# Supplementary material for: Construction of a radiation hybrid panel and the first yellowtail (Seriola quinqueradiata) radiation hybrid map using a nanofluidic dynamic array
Source: PubMed Central journal article supplement (PMC3943507; doi:10.1186/1471-2164-15-165), 2014-02-27

Additional file 1. Comparison of RH and genetic linkage maps. Genetic linkage maps of female is on the left and that of male is on the right, and the RH map is in the center. Solid lines connect the same marker placed on maps.

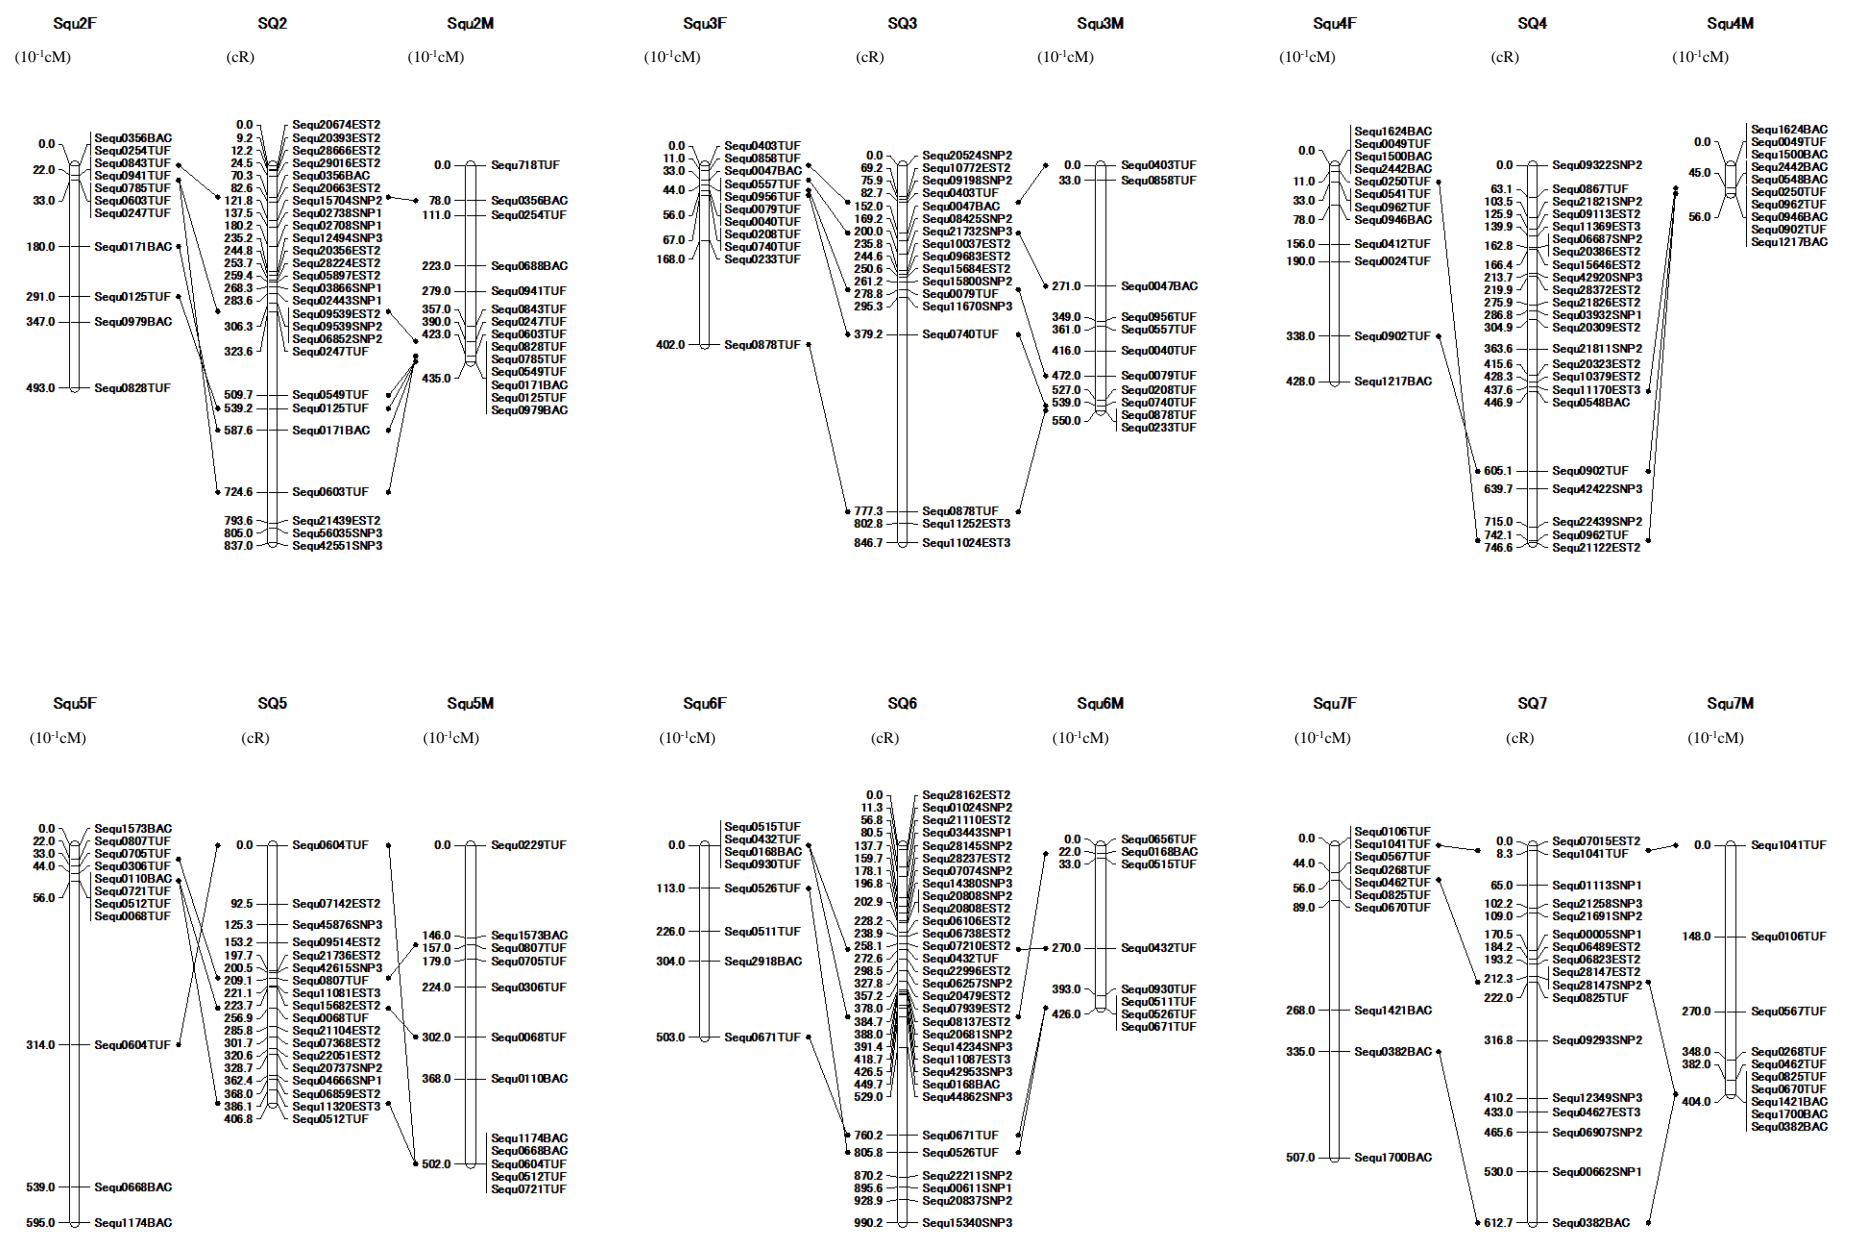

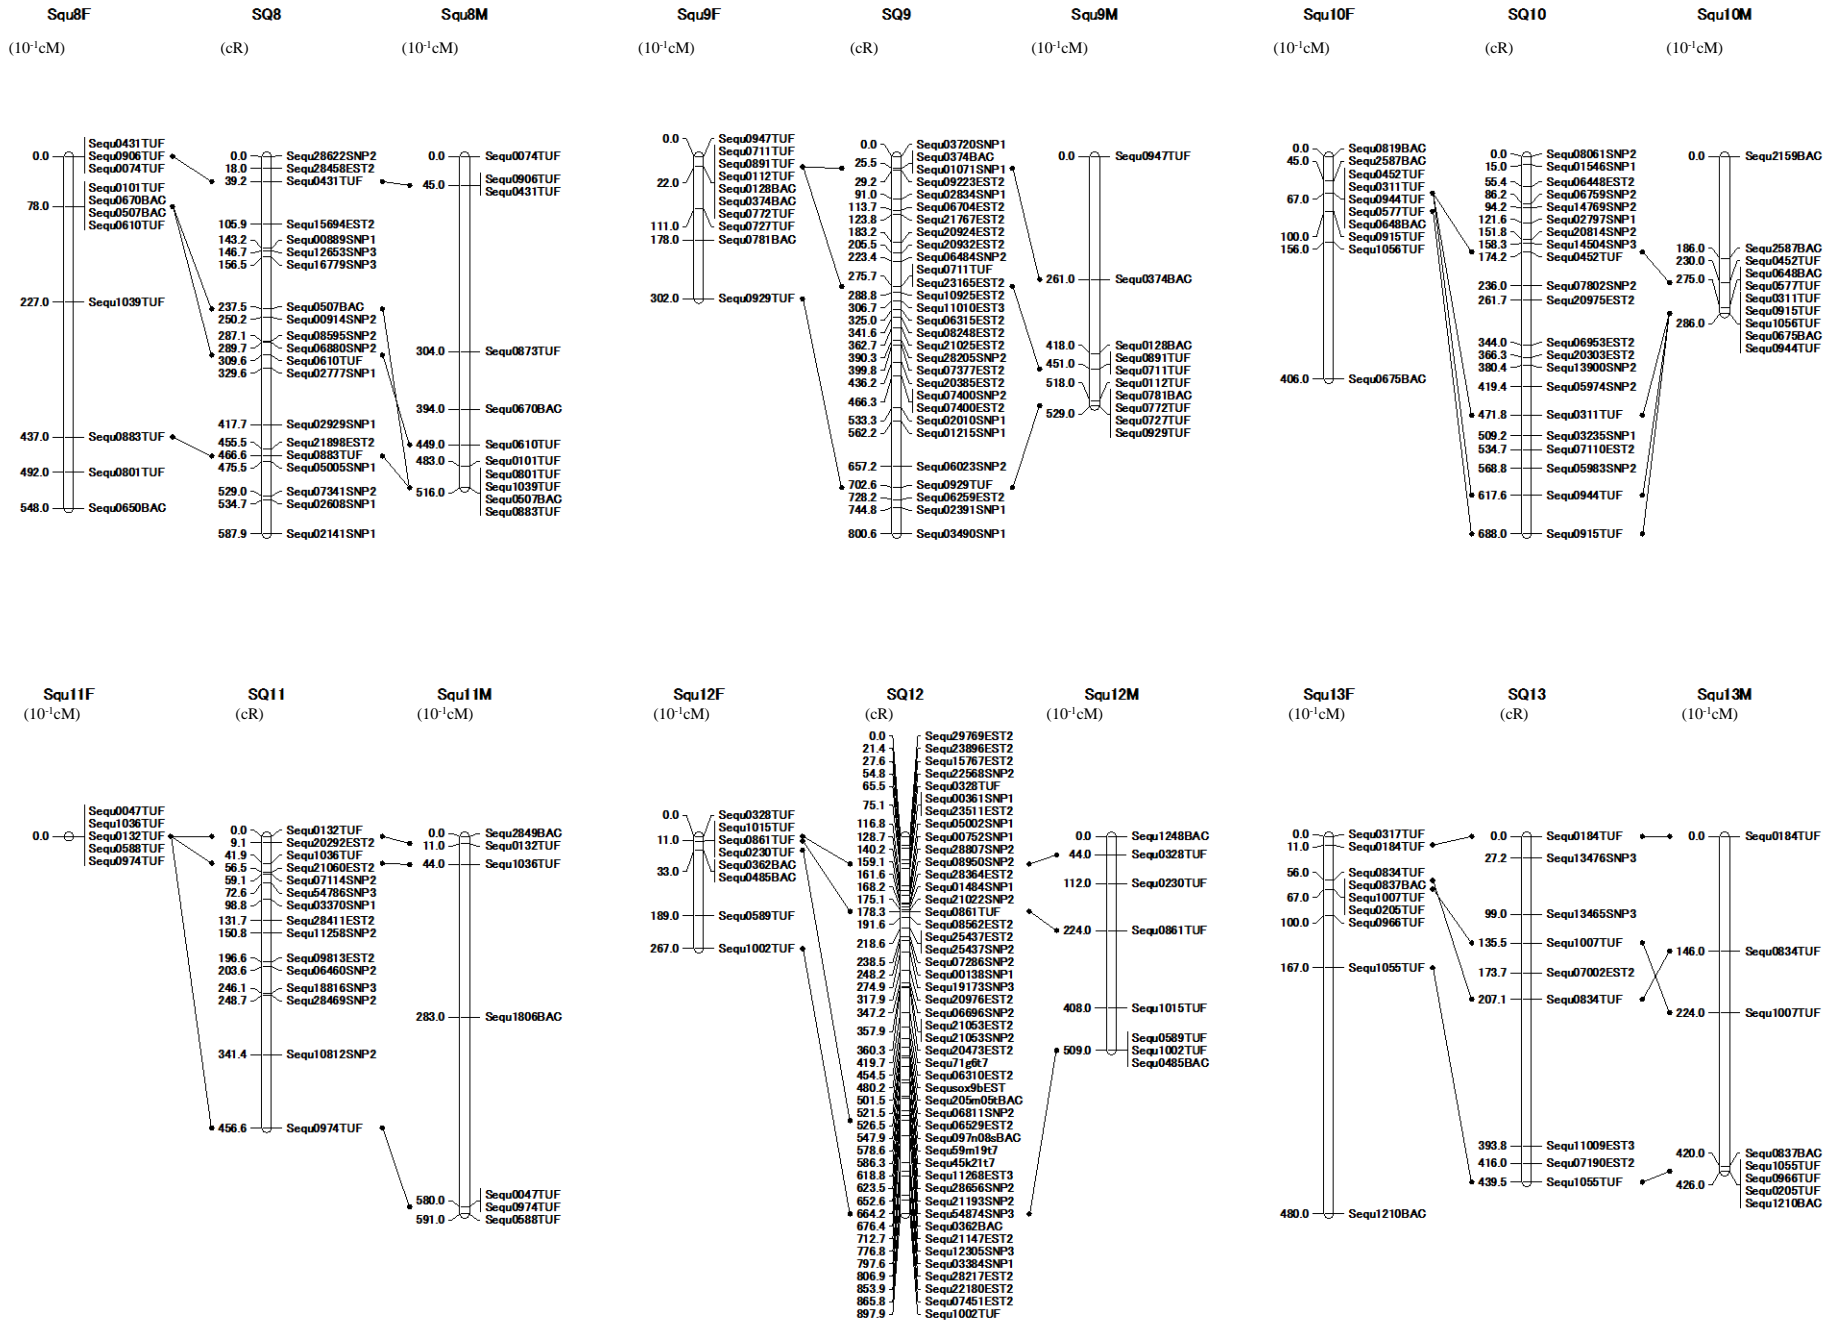

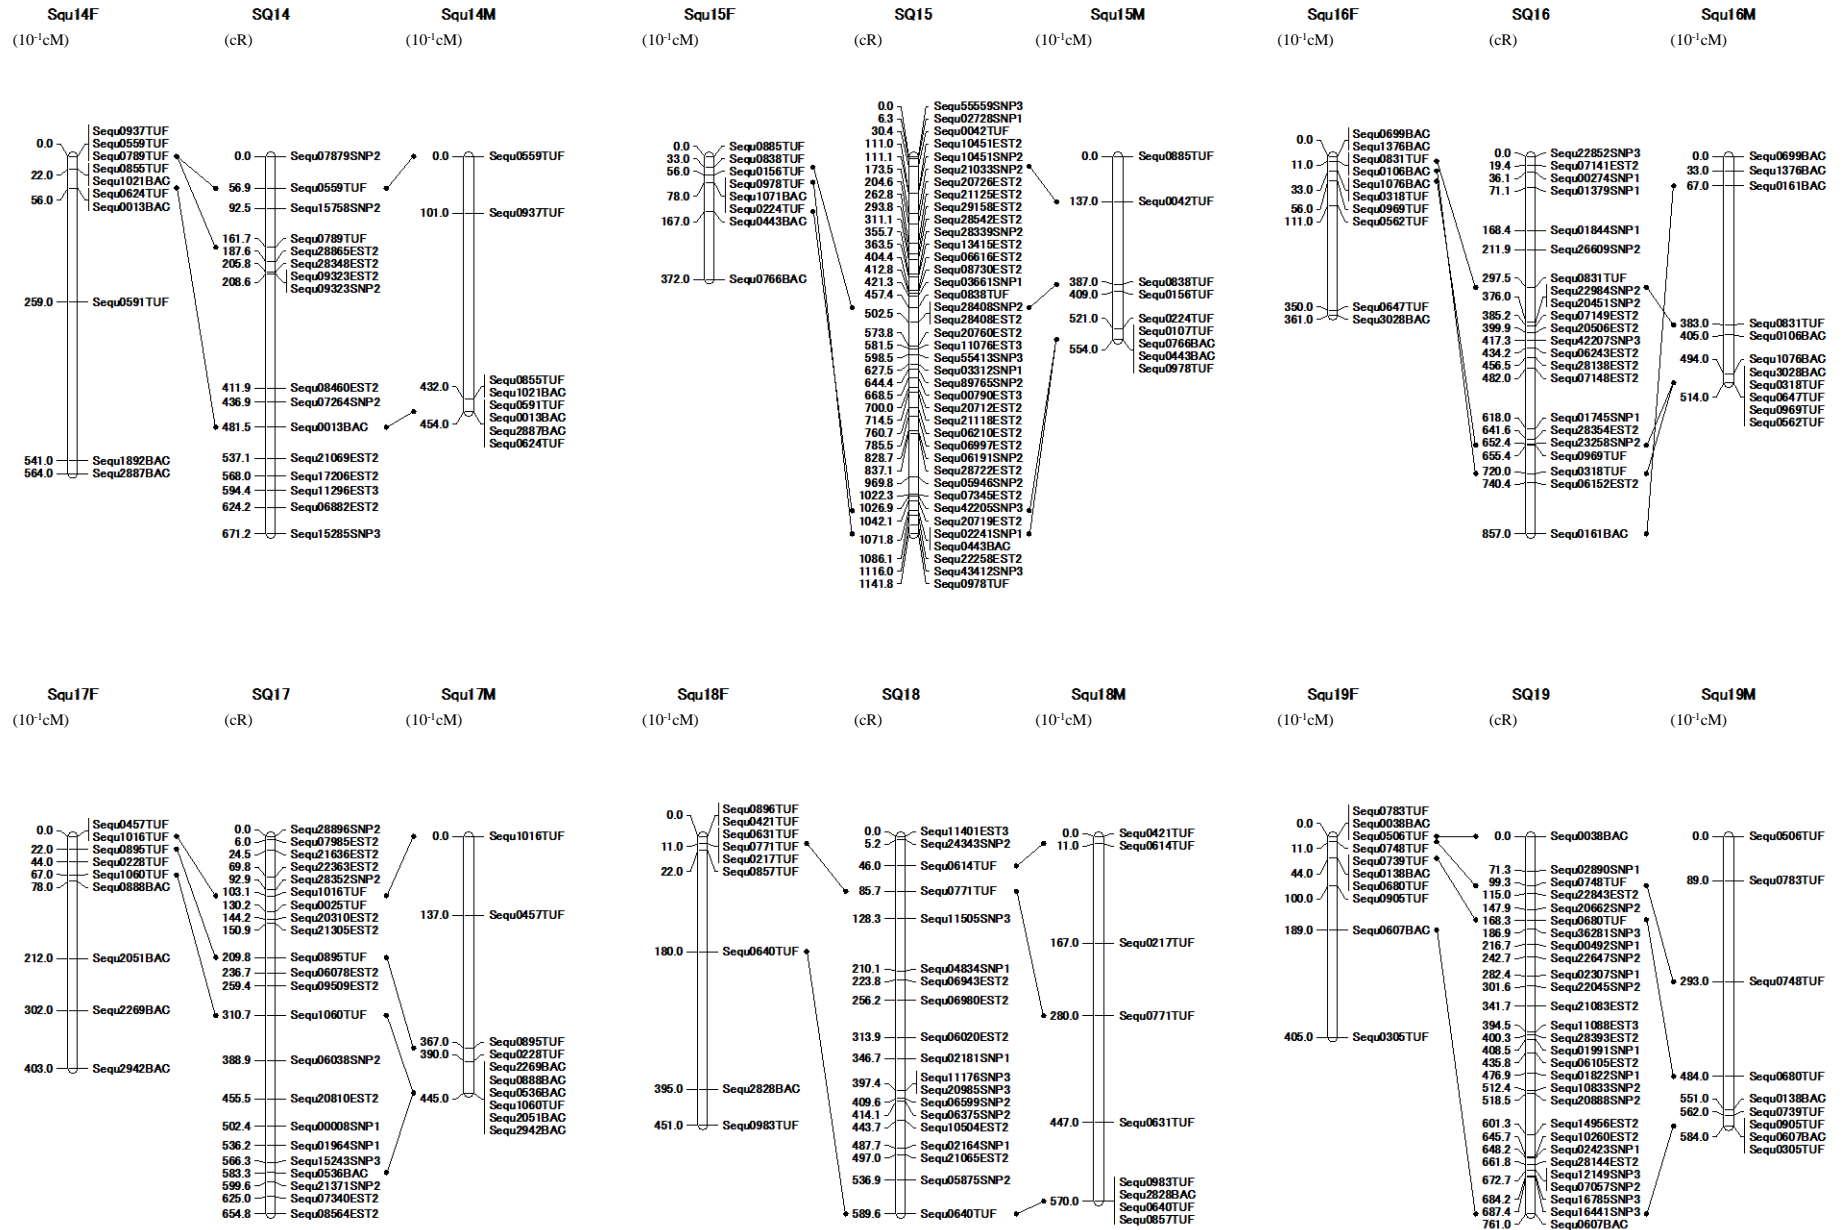

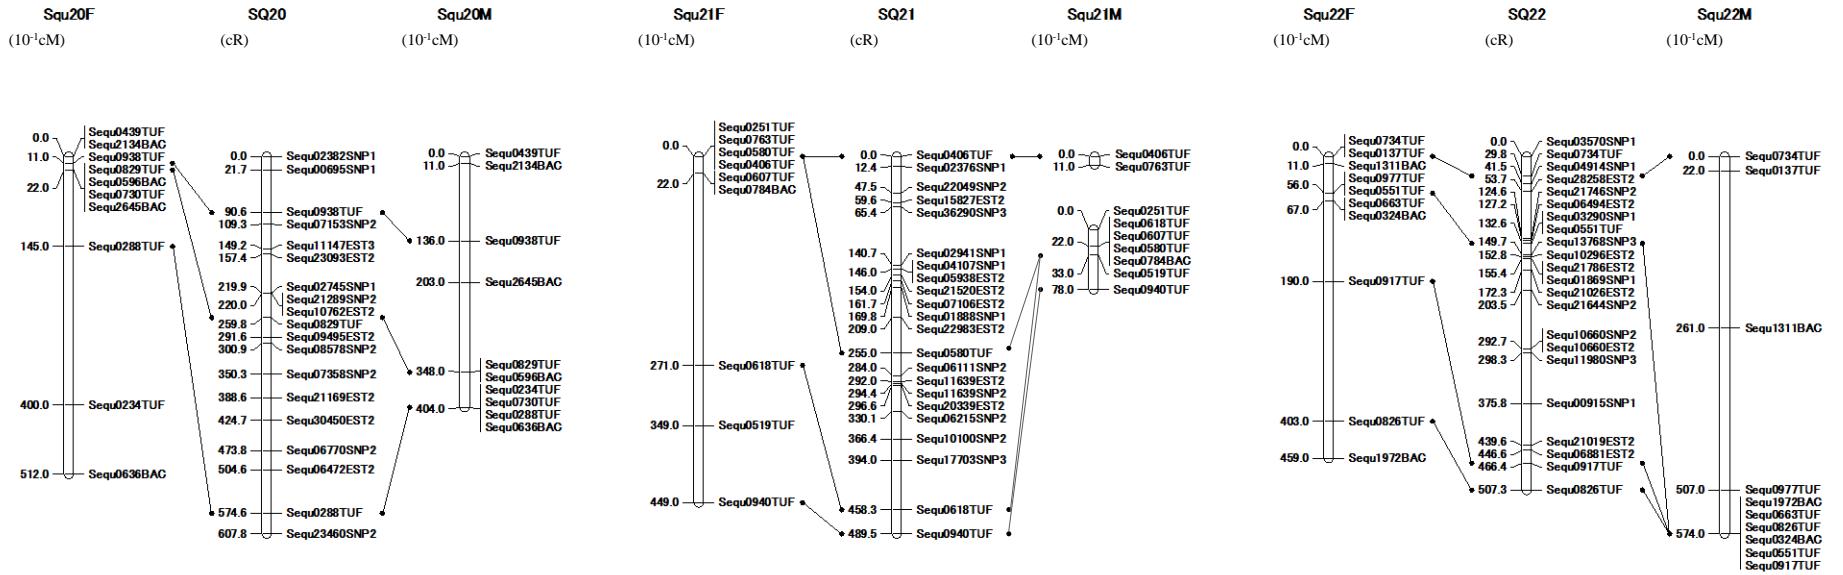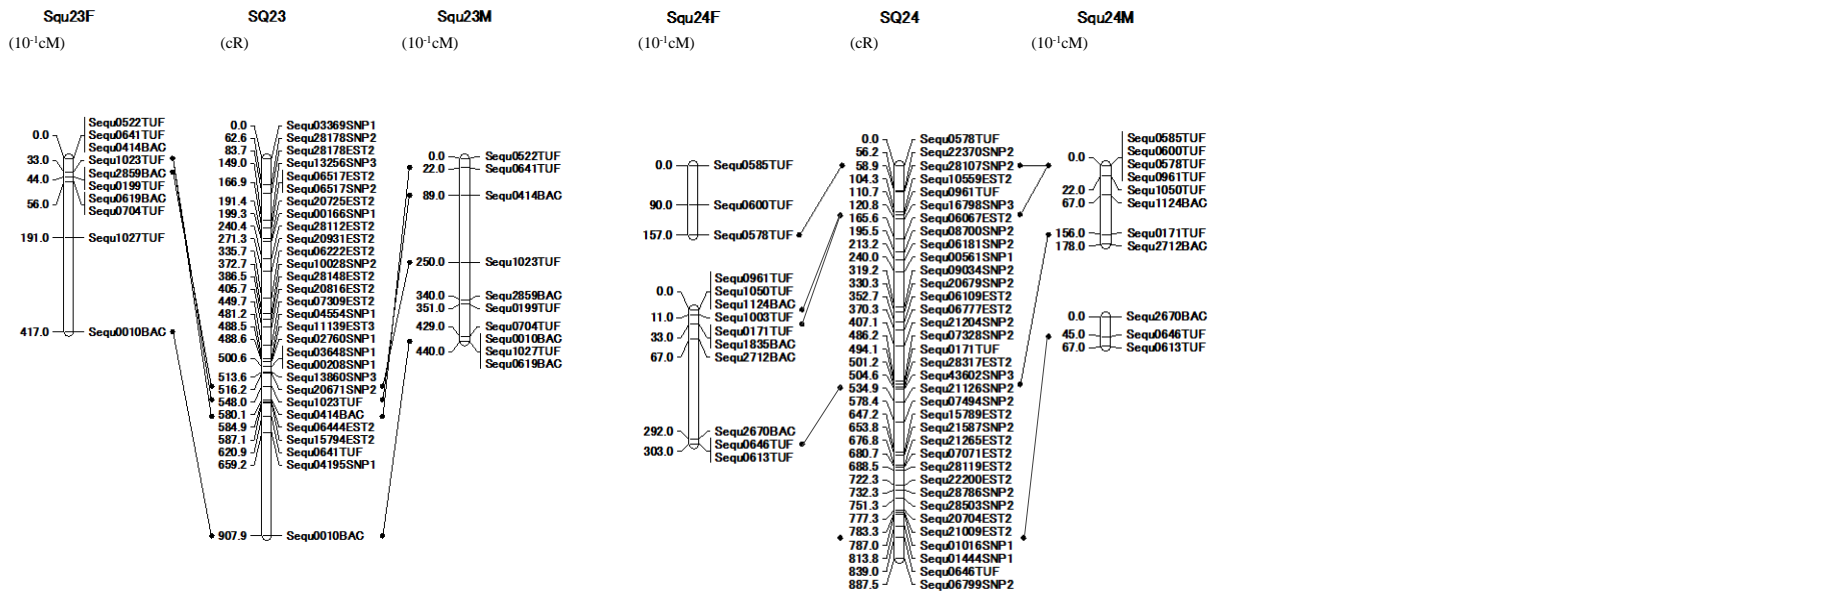

Supplement: 1471-2164-15-165-S1.pdf [file 1471-2164-15-165-S1.pdf]
