# Supplementary material for: Construction of a radiation hybrid panel and the first yellowtail (Seriola quinqueradiata) radiation hybrid map using a nanofluidic dynamic array
Source: PubMed Central journal article supplement (PMC3943507; doi:10.1186/1471-2164-15-165), 2014-02-27
Supplement: 1471-2164-15-165-S2.pdf [file 1471-2164-15-165-S2.pdf]

Additional file 2.

Names and nucleotide sequences of markers located on the RH map.

>Sequ00005SNP1

CCATCATTCAATTTATTTATTTATACTCATGCTTTACATTCTGTGACACATCGGAAAGTTTTTCCATTAGCTGGACTG  
ATAAATTTACCCCTTGACTCGATCATATCTTTGCTTAAAATTATAATGTGCCATGATAGATTTTTGCAAACAAGTAG  
CCTAAATTTTAAAGTCTCTTTATTTTCTGATTACTTTGCCAAATTATGAAATGGCCCTTAGTCTTTCATCACATAC  
GTGGCAAAGTCAGAAGTCAAATTCCTACAGACTAACTGCTGAATGAAACCCACCCAGTGTGTCGCGCTCCTTTTCAG  
GAGGCACACAATACTCATGTGCAATGTTTCATATATATTTAGATGTTTTATTTGTTCTTTGCCAAACAAGGCAGAA  
ATACCTGTTTACACGATTTAACTTGTGGATTTCGATCCAAAAATGAATGATGTAATCCAAGGAGTTACATTACAAGT  
CCAGGCAAACAGTAAACAGAGTAATTGCTAATATTGCATTATAACATCATTTCAGTGATAAGAATGACGCAGTGGGAT  
CTGAATAATTCATAAAGTACATTTCAAAAAATCAATCAGTTCAACAAAACAACCCAAAAGGACTTTGTGTATATACA  
ATATATATCATCAACAATAATATAGCTCTATTTGTTTCATCACCATCTTTCCAATCTCTTACATTTACAAAAAT  
GTCTCAGTACATGATTTTCAGTCTTTGCATAGCTGTGATTTCTCTGATAACTATTTGATATTGCTTGGCTTTTCT  
TTGCAGCACTACATTTGGATTTTAAACATTATTACGTTTGTCTGAATATGTACAAGTTAATCTGTCAAGGAGCTTTA  
GAGAAAGACAGTGTGAT

>Sequ00008SNP1

AAGCAGTCAAAGCAGATTTATTTCTTGTGTTAGCCTAATGGCTGATGGTTAGCTTTATAACAAAACGTTGTTAAAACATA  
AGCATTTTGGGAAGATATTGGCTTTAAAGCTTGCAGAAAATAAATTATACCCCGCTCTTTTGTATCTTCTTCATCTT  
TTGTGTTTTCTGTATACTTTAGATCAATTTCCCATATACTATATTTAAATTTGTTACCACAATATACTCCATTAGAAAT  
GTGTTTTTGTGCAAAAAGAGGGAATGTGATGCTTAAAGTTATTGTTGCTGGGATAAGAGCTTTATTAGAGCATCAACTTA  
AAAAGACTGTTTGGTGAGGTTATTCCAAATTTATATAGAAAGATGAGGGATCTTATCAGAGATTGGTGGACAACAAAGC  
TTTGTTTTACAGGACAGTGGTACAGAGTTTTCAGTGGGGTCCACACAGTCCAAGCAGGACCTTCTGATAGTGTTCCTCA  
GTGCTCTCAGTATGTGTTCTGTACACTAATGTACATACATGGCCCTGTATTCTCCACAATCTTCTTCAGGTCGACC  
TCAGAGCGACCCACTATCACCCCTGGTCAGCGTATCCTCACATGTGCCGTGACCCCTTCATGGCCAGATGGAGCTTCTCA  
GCAAAGAAAGCTGGTATGTTCCAGGCACATTTTACAATGTCAATGAGACAGTCTTCGATGTCTCCTTTTCAGCTCCATG  
TTCAGGGCTTT

>Sequ00138SNP1

GTAAATTTACAGTCAAGTAAATCCAGTTATTATTATATGACCAATATCTCACACTCCCCTTAATAGCTTAATATATAAC  
GGAGTTTTGAAATATCAAAAAGTTGCAGCGTAATGTTTGAAGAAGGGGATCAGATAGATTTCTTACATTACAAGTCTAT  
GTATGTGCAATATTTTAACTCACATAATAAGGTTATACACGACAAGCTGGGGTTAGCTGACTGACCCCTAGCTCTAC  
TCTTGGCTTCTATTGTATTCATGTATGCAAAGCCGGACTGAAACCAGAATCTCCTGTTTGAAGTAAATACACGAGTGT  
GGGGTTACGGGGCCAGCTGATATATTAGGGGCTATCAGTGTGTTGGCTGCTGTTGAAACTTCTTAATGCAAACCAT  
TTATTCCTAATTTAACTAGGTGAGGCACCAACAGGCCGTGTAATGTCATCCCCCTCAATGTGCATCAGTTAACACCC  
GTTTGAAGGACTATTCGCACACAGTAGTCTGTGGAGAGCATTTTCTTGGGTTTTGGTTTTAGTTTTGCTTGTGATGATCA  
AATGCTGTATATTAATATCTCTTTTGCAGTCTTATTCCCTTTTTGCTGAAATTTTGTCTGTCAATTTAAATCTAATAA  
ATGTGTCATTTA

>Sequ00166SNP1

TTTAAATTTGTGGATGAATGCACTTCTTAAACTGCAGGGATGACGTGATTTTCCCTCGGTAGGTCGTCCTGACAACACGA  
GCCTTCCAGCTTTGTGAAACATTTCCATTTAACAAGTCAGAGTAATTTAATTTGTCGGTGCAGTGTTTAATGGCGTGG  
TTGTTTTATTCTAAGGATAGTATGAAAGCTTTGATGCGGCTTTAGAAGCCGAGTGTAGTGTAGATCCTTTTCTCACA  
TGCTTGTAGCTACCTGCTTATTATTTCAATGAACACCTGTGTTGCTGTCAACGCGCTCTTCGTCAAGTCTTCACTCC  
GTCTGACAGTGGGATGTGTGTCTGTAGTCGTCTTTGAGCGCTGACTGTGTGATGTGATGAGTGTGTGTCGAGAGT  
CTTGTCTCCAAGCCAGTTTGTGTGATGTTTCCAGTTTTGTAGTTGATGTTCCACCTTAGCTGATAGACAGGATGCAG  
CGAATCAGCCAAGAGGTTCAATCTGGTTCAGGAAA

>Sequ00208SNP1

CAGTTAATATGCTTCATCAGGACTGTGTGGGTTGTGGGTTGATCAGATGTGACTGACAGTAACCAAACAACCCTGCTT  
AGTACATAACATAACTTCTCCTGTTGAGCCCCACCCACTTGAACCATGACACATAGACACAAACACAGAAATCTCA  
TCATGTGAAAAATAACCAAGATGGTGTAGATTTAAGCAGAACACTTTATCTTCTGTTAGGACAACATTACTCATAGTA  
AGAAGGTTGTTAGGGCTTTTCAGTTTACGGTGGGTAGAGAAGCCGTATCACTGACATCAGTGTGTCTCACTTGGGTG  
TGTTTTATTGGACAGTACGAGATTTAATATGACGACGCATGGCAGGAGAACTGGCATTACAAGAACGACAACCTCCAC  
CCTGCTCTGAGGTTTTGTGACCTTTGGTTCTCTTTGAATACTCTGCAAACCTCAGGTGCCACTCCCATCTCATCACAGT  
CTGCCAGGAGGGCCAACAAGGCTTTTTTTCTTTTAAATGTCTTTGTTTCCAGGACAAAACAGACCCACAAGTATCATGA  
ATGCCATGCATGTTTACAATTAAGGTAACGTACAGCCCAGACTTTATCTGTACCTGATGACCAGATCAGGAACAGTT  
CAGCACCAGACCGAAGAACTCTAGACCAGACGTAGAGGAACACAAAAGAACAAACAGAAAGTTGATCCCTTCATTGAT  
AATGAAAATACAAAGGTTAGAAAAA

>Sequ00274SNP1

TCTTACTTTTCTAGATCAGGGGAATGTGGCAATAATTCTCACCAACACTCTGTGCTGTACTTGTGTGGGATATATGA  
CAATCAGCCCTTGGCAGTGTGTTCTCTAAGGTGAATCTCATGTTGTATCTAGCTACGTTTGTATAATGAAGCACAAGT  
AAACACAAGGTCAGTGCCTCAAAATTCATACCCCTCATTAGCAGAATAATCCTTCTCAACTCCGATTAATCCTCA  
CTGTTCAACGTGTTCTGTGCCAAATGAGGAAAACATAAAATAGAGCAAACCTGCTGTGTGTTACTGTGGGTGCAGAA  
TTTCTTTCACACTTCTTGATCCAAGAGCAAAAACAGGTTGAGCATGTTTCAGTATGATATCCACCATGTTTCAGTTAT

CTATATAAGACAACACTACCCACATCCATTAACCAATAAGATAGAGTTTGCCAAATGTGAAATGGTAAT

>Sequ00361SNP1

ATGTTATCTTTTTTATTATTGGAGTGACGGTCAGACTGCAGTCCAGAGACATTCAGCTAATAGACAGTGACACACATCTC  
TGTACACGGCGTTTTTACACTGAAGAGCTCAAACACCTTCAGAACAGGAAGAAACAACCTCAGAAGAAACAAGTTAAAG  
GGGAAGCACACGACAAAATCAATGTTTACTTGTGGTAACTTGGGTTAGGTTTTTTTTCTTCTTTCATCATCTGCA  
TTAATGGGGGAGATGTTGTAATATTGACCTCATAGTTGATGTCACCTGGCGTTACTACATGTCATAACCTTTTTATCTCA  
GTCTAACAAAACGACGGCGTGATCACACGAAACTTTGATTTTGGTGCCGACGGCCCCCTTAATAGTGGTCAAACAAAG  
TATCTCCAACAAAGAGTGCATTCTAGATCATAAATAATCATCATTAAATATATTTTTTATTTTTCAGTAGTACAGGACA  
AACCAGACCTGGACATCATCACACACAGGTTCCATTTACTTCAATAACATACTGAATTTTACAATCAACCAATACCA  
CGGTAGTGTACATGGGCCGGAGCACGAAACACAGAAAATGCTTGTTTTTATTATTTTTTATCTACCACACTTGACTGAAG  
AGACCGAAGCACTGAGAACAATAATACAACCTGACCTGACAGCACCCC

>Sequ00492SNP1

CTCTGCTTCAACTGCCCAATAAAGGATGAAGGATCCTACACTGCAAGGTACAAAGCTGCCAGGTCCGAGGCCCTCAGCG  
CCAGCATCCGGGAAAGACTATGTGTGAAACTAGAGATCAGTATATGGCTTCCACAAAGCACTATTTACCGGAACAGAT  
GCACTGGTGTACTGAGTGTGATAATTCAGGATGTGCGCTGATCAAAAAGTTACTCCTCCTGAGTGTGGAAAGAAA  
TGGATAGCAGGACAGGAACCGCACGAAAGAGGAAATCCAATTCATATGTTAACACATTTGTTAGTATGTGTATGGC  
TGTTAATATGACTGTTTCGTAATTCAAAAGTCTTTTTCTTATTAGTATACACACTCTATAACCTCAGTCTTATTTTTGAAA  
ATCCTCTCTTTTCTTGACATGTATATGTGGGTTGTTTTTATAAACCATGTCTATGAGATTCACGATGGGCTGGTTAAA  
CTGTAATAAATAATTTGTTTA

>Sequ00561SNP1

AACACATCCTACTCCTGTTAGTAAAGCATCATCACAATCAACATTTTTCTCTTGAACATATGTTTGACATTCACATAGAG  
GCACTGTCCAGGAATTAGCCAGATCCTGCAACATTTCTGATCTCTATGGATCTGAATGTAGTGGATGAAAGAAAGATCA  
TCATAGCTGTAGCTTATGATGGTGGTAAGATCGATGTAGGGACCATCTCATAACCTGTGTGTACAGTGTGTTTCAGGG  
CTTTTGTCTGGGCAGGACTGGATATGGAGTATGCAGTACAGCACAAAGTCCCATCATTGTCTGGAATAGGTTCACT  
GTAACCTGCATCAAGAGGGCTGACTGTAAGGAGATGAGGTGGTTTTAATGATTTCTGTCACTTAATGGAGAAAATCTTCTGT  
ATTTTTAAAATTGTAATTTTAGTCACTGAGATAGTTGGCACTCACTTTTCATCCTAATTTCTGGTGCCATTTCTTGTTCAA  
ATCTCTGATCAAAAAGATTGGTGTAAGATGTA AAAACTTTGATTTAACATTTTCAGCTTGAGCGCGCGCGCAC

>Sequ00611SNP1

TACAATTGGCTTGGCCTTGCCCTTGACAAAATGCCATAATATGGAGTTCAGTTTAGGTCTAAGGC AAAACTTGAGATGC  
ACTCACTGTGAACTTCCAACAGAGAAACAAAAAACTCTTAAAAAGAACTAAATAGGTCTAAGTCTCATAATAAAAAATAAC  
AAAAATGAATAGCTGCCCTGAGGGAGAAAGTACGAGTTAACCTTAACCGTTCTTGTGTCACAACGGTCGTTTGTAAAGCA  
CTTTGGATCTTACAGACAGGCTGGTGTCTCAAGTATTGCTGGGTTGAGACGACCATTCTCCTCCTCGTTCGACTCGACG  
TTCGACCACAGCCGGCCGTAACACTGGAAGGCTTGGGCTGACTTCATCCACCTCAAGCAAATTCATGACATCACAAC

>Sequ00662SNP1

CTCCCCTTGTGGATTAGCTGAGTGTCAATGGAGAAAGGGCTAATCATATCGTCTGTGGGTTTACCTCTGCAGCCAGAA  
CAACAGTTGTTAATCTCTTCAAGGTAATAATTTGACATAACCTGGATCTTTACCCACAGAGTATTATCAGCGCAGGGG  
CCTGTAATTTACTTACTGCGCATATCACGCTCAGATTCGCTTGTATAGATCCGTGTACGCTGCAGCAGGAAAGATGG  
CCTACATTCAGAAAGCTTAAGCTTGTGTATCTTTGAAGATCCATCGAACTAATCTGTGAATCAGTTAATCTCGCGGAGA  
GAAAACACTGATGACTAATAGTGTGAGGCTGCAGACGTCACCGCATCAGAACCAGTCCAGCTCCTCGTAC

>Sequ00695SNP1

TTTTATTTTTCTGGTTTTGATTGTGTCTTTTTCTTTAACAGAGGGTTCGATGAAAACAATGAGCTCACAGTTGTGTCTG  
ATATTAACCTTGACCATTTCAATTATTGCTACATCTGAAAATCTGTTCTTGACGAAGCAACTCAATGTAATTCACAGAA  
GCGAGCAAATTCATCCTGTACAAACGCTAAGTAACATAACACCGGAGATGATAGAGAAAAGACGCGTCACAGTCGG  
GTGAGAAGGAACATATATGGACTGAACAACATGCCTTGATGCTAATAAAGCTGTGTTTGAACCTGGTAAATGTTGTT  
TCATTTATACAGGTA AAAAGGCTGAAGGTTACATCTGGGTTAGCTTTTTCTCAGTCCCCGCTCTCAGC

>Sequ00752SNP1

GGCGTTTTTCACATGTTCTGGACTGGCGCAATATATATATTTGACTATTTTTAAAGGAAGAGCTATGAAGAATATTTG  
ACATTACTGTAACATATGACCATTTGGGAAATGGTTGAGGAGACACCAGTGGAGAGGGGCTGTGTATGTTGTGGCATG  
GAACAGTTGCCCTCGTTGATCCCTCCAGGAAGTACAGCTACAATTGAGATTACATCGGTCTTCACATACACTTGGAAATG  
AACCCCTTCAACCTACGAGCTTGTACATGATATTAATAATGGTTATACTTATCATTTGTACAATTCGACTTTGCTAA  
CTGAGCTTTGCCACTATGTTTTCTTTTGGATCTTACATTTGTATATAACTGACTCATGAAA

>Sequ00790EST3

AGTGATCGTTAACTGATGGAGAGCGGTAGCCGGTTCGTTGAAATGTGTAAACGCTCACACTCAGAATGTCACATTACA  
GATTTGTGGGGAACAGAATAAAGAAAATTCACGTGGCAGCATCTCCAGTGTCCGGTATCTCATATTTGCACCTGAACACA  
ACGCAGAATTGTCGGGACTTCAAGGCTGTTCCGGCTACACAAGGGTGCAGTAGTACGTAGAAGTGGCGTTGTCTCTAT  
GGCTGCGGAGGACGCGGAGACTGATACCAGATTACGCACTGCCATTTCCAAAACCTGCGCTGTAAAGGTAAGATTGCACG  
ATGTATCACAAGAAAAGAGCATCCAGATCAAAAACAGCGCCTCGGCGCTATACAACAACCTCGGTGTCCTGCGCATC  
GCCCCGCGGCGCCTCACCTACTTACGGTGGTCCATGCTAACGTGGTCAACATGGTCAGCGCGCTCCTGGGACGGCCTC  
AACTACTCCCACCGTCAACTGCAGTCAAAGAGCCCAATGTTGCTACAAGCACTTCGCTGATCATGCAGGCTGCATTT  
TGTGCTCTGCCCTCTCGTGATCTGCTGGTCTGTGACCTCTCAGAAAGGCATCCAGATGTATGAATCAGATGGCTCCATC  
ATGGTATACTGGCATGCTCTGGATACTCCAGAAACACCTACAGCTCAGGCCGTGTTGCTCGAGGGATATCAGCTGTG  
TGGGAGAATTTATATATGTGTGGGCGTTTCATCAGGTGCAATTTTCGTATTTGATATTTCCAGTAAAGGCAGTAATATA

ACCCTGTCCGAGGTCTGGAGGAGCACAAGCAGTCTATCACTGACATGGCCTCTGAGTGCTCTGGTAGCCAGGAGTGC  
ATAGCTGATCTGGTCAGTGCAGATGATGGGGGCAACCTTTGTGTCTGGAAGTCGGGGGAGGAATTTTCAGCTGCTTAAC  
AAGATCCCTGGCTTTGATATGAGCTGCTCATCTGTTAAGTTGTGGAAAGGTACAGTGGTTGCAGGCTATGGCACAGGC  
CAGATCCGTCTCTATGAGGCAGTGCAGGGAATTTCTGCATGCTGAGGTCAACGCCCATGCTCGCTGGATATACTCATT  
GACATTGCTCCTTTTTCTGGACTGCTTCTGTCTGCTGCCGAGGATTCTCTAGTCAGGGTGTGGCATCTGACTTTGACC  
CCAGAGACAAACAGTGTGGAGGTCGCCATTTGCACAATGAGTGTGTGACAGACACACAAATCTGTGGCGCCAAGTTC  
TGTGATGGTGTATGGCTATGCCCTTTCAGTGCAGGT

>Sequ00889SNP1

AACTCATGAGAACATTTATTACAATACTGGGCTGGCAATGGGATCATTGGTTTCCCTGCTGGGGCTGAATTACAGCA  
CTAATCAGGTCTCAAACACCCCTGACATTTTCAGAAGCTAGCTCTGGACTTTTCCCTTCGACAGAGTTACACAAATTTTT  
TCAACAGTTTTAAGTTCACCTAAATGAAATAATGGATCTGTTGAGGGAAAACAAATTAAGTGAATAATGAAAGTGTG  
ACAACCTCAAACACAGCTTTTATTTTTGGTACGAGAGCAGGCGAAGCTCTGAACAGATTTCTTACCACAGAATCACTC  
CTGTTCAATTTCCCACTTTGTATAAAATTCAGTTTACAAAAGCTTTTTTTTT

>Sequ00914SNP2

GGAAGTTCAGTGCATATCGAAGCTCTGCGATGGCAGTTGGACTGGATTGGATTGGCTATGCTGCAGTCCATTGCTT  
TTGGAGGATTCATGGGATACAAGNGAAAAGCCAGCGTGATGTCCCTGATGGCTGGTTAGTTTTTGGTGGATTATCTGC  
TTATGGTGCCTATAACATCTCTAATGACCCAAAGGACATAAAGGCTCTCATTTGTCATCAGGAGTCTCTCAGTAGT  
GATGGGGAAGAGATACAAAAAAATCTGGAAAAATATTGCCTGCTGGCATTATGTCGGGGCTAAGTTTGTGATGGTGT  
TTCGACTGTTACTCCTGATCATGGTGTGATTGGAGGAACAACACTGACCAAACTCAATGAACAAGCCTTATTTTTAA  
GGAAACATCATTTCCAGTTAGCACAGTAAAAACAAATGTTATTTTTGTATGGTAATATGAGGTTTCATGTCACCAGAAAC  
CTTGCAAAAAGGTTTACAGATTTAAGATAACTCTTATTGCAGTAAATCCTTTTTGGTAATCTTGTATAACTTTTTTTGT  
ACTAGCTTGAACATAAACCTTATGATTAATTTTTAATCTTGTGTTATTACCAAGATTTATTCCCTCATAGTACGGGC  
AGCACAACATATGTACATGAGCTTTGTGAGTGCTATTGTTTGTCTATGGCAGTGTGTTTACTGTATACACTACAACATC  
AGTTTTTGCAGGCTCTTAAAAATATCAAGGTTTATAAACTGAAATATTCAACTTCTGAAAAAAGGACAAGATTGAAGGA  
TAAATTTGGATTCTTGACTCCTNACATGCTACGGGAAAGGAATTAAGTTAATATGTTTGCCTTTTTTGAATAACAGC  
AAAACAAATAAATTGATGTG

>Sequ00915SNP1

CTTGAACCTGAAGTGCAGGTTCTGATGCACAGGCCAGTCTCCAGCTCGCTATTTTAGAATCCCTCCCACGGTTCGGTGTGC  
AAGAAGCCAAATGAGCGACTGTTGGGAGACAGACGCGGAATGTGCTACAGTATGTCAGTTTTACTGCACCTCCTCATA  
TGAGGAGAAATGCAGTGAACACAAGCCAGGATACCTACACGGTGCCACACAGTGGACGCACACTGCAACAGCAACTC  
CACTCCACACCACACATGAATGTGATGACCAATGTGAATGGAATGCTTTTGTATGATTTCTATGTCGAATCTCTACAT  
TTTTGATTGATTGATTGATGTCGGCCAAGTGTACTGTAAAAACT

>Sequ01016SNP1

CCATATCAACTGTATTTTATTTTACAGTGAGTGCCACTTCATCAATGCTCAATCATATATATATCTTTATATTAGT  
AAGTAAATACAATGTCAATGTCTCAGTCATAAGCTAGTGAACAGCATTATGGGTCAACAATGACATCAAGCAACAACA  
TGGGAAAATGATGATTTGTAGTCAGAGACAACATGAAGTGAAGCCTAAAAACAGACAGTTAAAAACACCTAATCCTTTTTGC  
ACAAGGAAGGTTTTTACATTTCACTTTCAAGCCATTTTCAGACATGAAGTAATCACAGAAGAGATACAGGTTTTGATAT  
CAATTCAGACAGTAAAGTATCAGTTGTAGAAACTACCAACATTTGGAAACCACACTTTTTTCCAATGGTAATAACAG  
CTGGGTGCAAAATGTACCTGTATGCAACCAGTGGTTTCATCTGTGCTACACAGCAGTACACAGAACTACTAAGTGTGCG  
TAGGATGTTAAGCGAGAAAATGTGCGTGTGAATCTGAAAACATGACTCGTGATTTCAGACAGCTCAAGTAGTTTTATCT  
GTTCATTTTAGGCTCAGTGTGCTGCAGAGATGAGAAAAGTGCAGACAGACAGAGAGGTTGGTCAAGTGGACCTTGAAGT  
GGACTGTGGATGGTTAGAGCACAGAGCGATCCCTTTTTTAAAGTCTGCTTTATGGAAATGAGG

>Sequ01024SNP2

ATTATAAATCCATGCTGACCGTCAACCTGTGTGGAGTCATAGATGTGACACTCAGCGTCCCTTCTCATCAAGAAGG  
CCAAAGGGAGAGTGGTGAACGTTGCCAGCGTGTGGGGCAATCAGCCCGTTCGGCGGACCCTACTGTGTGTCCAAGT  
ACGGAGTGGAGTCCCTCAATGACAGTCTGCGTTTTAAACATGGCACCCTTTGGAGTCAAGGTCGCGTGCATTGAGCCAG  
GATTCCTTCAAACCAATGTGACTGATACAGTATACTGAAGAATAACCTGCAGAGGCTGTGGGACAGATTACCTCAGG  
ATGTGAAGGACGACTATGGAAAAGCTTTCTTGGACCAAGGTATGAAGGGGTTGGATGACAGGTTCAAGGTGTTACCGG  
ACTCGGACCTGATGAAGGTGGTTGGCTGTATGGAGCACGCTGTCTCTGCCGTTACCCTCGTACTCGCTACTCTCCTG  
GATGGGACGCAAAGTTCCTCTGGTTGCCTCTTTTCATACATGCCAACCTGCATCTCAGATAAACTTTTTCTTAAAAGTA  
ACCCCAAACCCCAAAATTTCTGTCTGTAGTTTCTGTAAAAGTAGTAATTTTTGTGGAAACAGGTTTACACAAAAGAGA  
GACATTTCTTTAATTTTTTACACACAATAAATGTTTGCAGTTAAGTATTCCACCATTTGATAACATCATATAAACATA  
TTCTGTATTATAAAACATGTTTGGTTTCGTATTATGTTTTTTGCTTACTCTGGACATTAGCATGCCTGTGTACAGA  
TTATAACATCTCAGTTAATGGCCTCTGATCACAGACGATGGCATTGCTTCTTGGACATCTTGAACACAGTGTACACA  
CCTCTGTCAACTTGAAGGCTTTTTGTTCTTGGATGGACTTTAGCTCCGCTGCGTCTGTTTGAAGTGAAGTTTTGATCAT  
TAACGTTCAATTTGTTCTCAATATCAAATACACAACAGCGTTTATCTGTAACCTTTGGCAGAATTGTTGTGTTTTCAGT  
AGTTCAGTAC

>Sequ01071SNP1

GTTTGTGTGTCGGCACAGTCTGTGAGTCCGTAGTTGTCTCATATTTCACTTGTCTTGGCTCAGATATCAGCTTTAACT  
TATACTGTGTTAATCCCAATGGAGATGTAACACTTGTACTTAACATTTCACTCATACTGACTGTGTAGTTACAGCCGC  
TTGGGACCAAAATTCAGTTGTAAGGCTAGAGCTTCTCTCAAGGGCAGTGGCATCAGGCACATTCCTAATACCTGGGAGT  
CATGTGGAAAGCAGAGCAAACAGAACCTGGATGTTATTATATGTCGCCGACTCTGGAAAACATCTTGTATTTGT  
CCTTCCAGCCTACAATAAATATGCTTTTTCAAA

>Sequ01113SNP1

GTTTCGTTTCAGAACATTTTAAAGTCCCGTGTTTAAACAGTATTATTGATGATCTCATTGTTTTAATTTAGGGTTTTTGC  
CACTTTTGAATGTCAATGTCACACACAGGAATGAATGTTAATATATGAAGCAGGATGTTTGAGAGAGGGAGTAGAGA  
TGTACAGGTCCCTCGCGTCAGCAGTGACGGGGCTGCAGGGAAAATAAATTATTGGCAGATTTTCGAAATCTAGTTTAAA  
TAAAGGTGAGACGTCTACGTCTGAAATCAGCAACTAGAATGAAAGTTTTCTTCACTCGGTGTCTGAGTATCTGCTGAG  
CCCTCACTGCCACAGTAACCACGACAACC

>Sequ01215SNP1

AAAGAGTGGCACTATTGCAGATAAATATGGGCCTCTCCTCTGTGTGGCCTACATATGTAGCATGCGGGTTGCCATGTTA  
GGATATTTCTTGCCTGAAAAATGAATTATTTCAGTGTCTTCTAGCAGTGGATGGACATGCATAAACACTTAATGCGGTA  
CTTGATATTGCTAGGGTTGAATCACGGGTAAAGCAGTCTGGCCTGGTATGTGTGTATAACTTTGCCGAACAGTTGG  
ATTGGTTGCTGCTGAACTATGACCTTGAAGCAAAGCTCCACCTCCTTTTCAATTATCAATCACAAAGTTAGCTGTTACGA  
TTAATGCCCAATAATTTGTCTGTTAAACAAGAGTCCCATCAATCATGCTGTTTCAGACCACATACAAACGCAGTGTTC  
GCACAGACACTGAGCCTTATGATACAAATATGAAGTGTGAGTAATCAATTCAAAATTC AACCCCTTGCTTTT

>Sequ01379SNP1

CTTCCCCAGTGCCTATTTATTGCTTTGTTTATTTCTGGTCCAACCTTTTGCTGAGCGAATATTCCTTATCAAAAAGGTA  
TTATATTAGATTTAAGTTTGACTAAATCAGGTCACCTTTAATTTCTGTTTGCATACATGTGTACGTCTGTATTTCTTTTG  
CTTTCTTATCCTCGTGTGCTTTGTTAATATGGAGCCTGAGTTCCTTATCTAGTGGACTTTGCGCTTCTCTCAAT  
ACTCTGATGCGCAGGAGTATACTTTTCAATGTGATGAACATGCTGTACAGGACATGAATGTACAGTAAGCTTAATAAAAT  
CTTGATAACAAC

>Sequ01444SNP1

AAATACTCTTTTATTTCAATCCATGATCCCTTGAGCCTGAACAAGAGCTACTGATCAGACAGTTTGGTGAAGCTA  
CACAAACCACAGATCAGCAGCTCTGTGAGTGGCCTGTTTGTATCTACTGCTCATCTAATGAATCCCTCTACAGTGTAT  
CTGTAATACATACACATGGAAAAGATTGTATGACCCACCAACCCGCATCAAAAATACACATGAAAAAAATTTATCGTCAT  
CTTCTCATCACTGTCTGTAACAGTTTCTGAAAAATCACACAGTTCGTTTTTTAAATAAATTACAAAGTAAAATACT  
ATTACCCACCTGAAATGGTTAAAACGTATTTTCTCCAGAAAATATGAAGACAAAGATGACGGCATTAACCTCTTTGA  
TTTCATTCTTTTAAATTAGGCATCTTCTGTTTAAAGTGTTTTACTTAATGATGTTAAATAAAACTCAAATAAAACACAC  
TCTCACACAAACACCACACACATCTTCTTTTAGGTTGCATTGTTTTTAGAGTCAGTTTCTGTTTGGCAGTTGAAGTAG  
TGACTCTGTTGCAGAGACAGAGCATGAATGACGAGCAGTGAGGAATAAATTACAC

>Sequ01484SNP1

TCTCTTTGTTCTTCTGTTACGCCTCAAAGGTTGTCTGTCTACTCCATGTAATACATAGGGCTTTCAATATTCCTTCT  
GCAAAAATGATACACCAATAGTTTGATGTACCTTTCAATTTTAACTCCAGCAACCTTGATGATGTCAATTCAGAAGA  
AAACAGCTGATGCAATTCAGGGATGTGTAATAGCAGTATACTGTGTGTAATTACCTTTGTACAGGCCACCATGACC  
CAGTGGCATTGTAAGTGTGCGGTTGGGGATGGTATAGAAGAGGCTGTGGCAATGGGGATTTCACTTTATGATTGTGT  
ACTGATAGCTTGTACAGTTCTTTAACACACTTTATTTACAACAGTATTTGTGTATATTTTATGAAGTAATAAAATGA  
ATAACGTT

>Sequ01546SNP1

CTTGTGTTGTAGTTGTTGGTTCCCTCGGTGACCCCGCATCATTTTGGACTTGAAATTC AATCGAGCCTAGAACCCAGACTC  
CATGATGTTTTGGGAATTGATAAATTATTTTCTGCGTCATTGTCCCATAATTTGTCTCTATTGTGCCATTAGGTTAA  
AAAATCAGTAAAGATTTTGATTGGGTGGAACCTGCAAAAATGTTTTTTTGTTCCTGTTTCTTATGAAAATGTGGCA  
CAAGGTGTTTCAGCAACCTGTGTTTATCACTCTGTCTCGACTGAAATACATGCAGGGGCTGTAAAACCTCAATAAATT  
G

>Sequ01628SNP2

CTTCAACATCAGACTGTGGAAAAATCAAAGCCTTAAAATGTGAAAAACAGCAAAACCNCTAAAAAGTCAGACACTGGA  
GACCNAAAAATCCCCTGCAGACAGGCTCTCATCTACAAAAAAGTGTGCAAACTACTGACAGTATTTCCATTGTCTG  
TGCCTTCCAAGTAAACTCCTGTCTGAGTTTCAACAACTTCAAAAGCCTGAGATGCTCTGACAATCGCTCACACAC  
CACTTACGCTGCTAAGCTGGTGGCATCACACACTTTCCCTCGGCCAAGCCACTAAACCCGGTGCCTAACCTTTGAC  
CCTTGAATGTTCCCTCAGTATTGAGTAAACATAGTGGTAGATTTAGGTGAGGCTTCTGTGGCATCCAAATTTCCAATT  
GTGTCTTGTACAGATGTGTGGACACAAAGTGAATGTAATCCAGTAAATAATGTAGATAGTTCAATCTTATTTACTA  
ATATTTCTCATCAATAATAAGTTGAGTATAAAAACAAGCCGTGTGCTTAAATAAAGCTAGTAAATCAGAATGGGTGGCC  
AGCTGTACTAAATGAATCTTCATAGGAATCACATTTGATTTGACCTTTTGTACTATTTAATGCGAAAAACATTGTGAC  
TGTAAGTGGGCTTTATTTATTTGGGGTTGTGTTTTCAGCAGTCACTTGTGATGTTGACCTGAAAGTCATGACTCTGAC  
CACTATCTGCCCTTTGTATTGAGGACCATTTGTTGAATAAAAATAACTATGCAAAAGAGGGTATAGTTATGCTTAAAGAAA  
ATGTTTGATAAAGGTGAATAAAGTCTTTTTTCAT

>Sequ01745SNP1

AAAACACTCGTATAATTACATAACAGCTTTTTTACATTTCTGAGTTTCAGCAGAGGTCAGTAAATGATTATGTACAGTCAG  
ACGCCCCCTCAGTGAACAGTAAGGCAGCAGCTCGGCCGTGATGGGTAAAGTCCGGTGAAGTAAACAAATGAAAGAAGAA  
GAGTTGGAATGAATTTCTCTGCATCAGCGCCACAACCTACAGTCTGACACCAAACAACGTGGTCTCAGCATGGACTG  
AACTTTATGGCGTTCACTCCCTGAACTCGTCTCAGGTGGGTGATATAAGGCTGAACACGGTCCCTCAGT

>Sequ01822SNP1

TGGGAAGAGACAGAAAAGAGAAAAGAAATGCCACTCAAGAAAAACTGCAGCTTCTTAAAAATGCAGGCTGAAATATCCCAA  
CAGAGGGCAACTCTGGACAGAAGTAGCAGTAAAAAGGATATTTTCAACAACACAGAGATCAAACCTGAGCGCACCAACAA  
AAGTGGACAAAAATCCAAAGAGATACTGAAATGGAGAGAAGTGCAGTCTCAGAAGCGGAAAGGAGAGAAAAGACAGAAA

AAAGGAACAGACACCTTTGAAAATGTGAAGGTAAAAGTCAGAAGAATCTTGGAAGAGATGAAGAACTTTGGGATTTG  
CTGGAAGACAGTAAACAACAACCTGGAAATTA CTCTTAGAGAGAAGCAAGAGCTAAACACAGAGAGCGGTCAAATCGAA  
AACATGAAATCTGACTCTCAAAAGCAACAACAAGACATGAAGGCTGATGTGGAGAAGCAAAAACAGCAACGGCATAAA  
CAGGAGCTGGACAACGAGTTACAAATTAC

>Sequ01844SNP1

CCGCTGTAACCTTAACGTAACATATCTGAACTGAGGGGAAGTGTGTGTGAGTGTAAATGTCACGTCAGCCAGCGAGTG  
TAAACGATGGCATGAGGATCATACAACACATCAGACAGCGGCTGTGAAATTTCTTAAAAACACATCGTTTACCTGCGCT  
GTGCTGACCACGCGCTGCTGACGTGACATTTCCCTTTTCCATTTCCCGCTCTTTCTCTCCCTCCTTCTCTTGTCCGGC  
GCTCTCTCGTCTCTCATCGATGCCGCTCTCTCGCTCCAGAACACGAAACTCCCAGTCCCTCAAAG

>Sequ01869SNP1

ATCATGTTTTCTTCTTTAATTACCCTTCTCAAAAAATATGTCATCTCAGAGAGAGGGCGGAGAGCAGGAGGCTTTGC  
TCAATGTAAGATTTTTTAAACTTCTTTCTCCCTCATCACCACCTTCTGTGAAACATCTCCTGAAGGCAGGTATGTTA  
TATGTATGCTGCTTACATAAGTTTCAAGTGAATACCCGCTCACTTCTGGTTTTTAAAGGCACTTGAAAAGAAATGAGG  
GACAGTCCAAACATAGTTTCTAAGATTTGAGCAGAGTCTTCTACTCTCACCTCTCTAGGCAGTGTTTACGGGGATG  
GAAAGAGCAGGGAGAAGGATGAGTGAAGGGGGAGGAAGTTAAGATTTGAAAGAGGAAAAGATGATAAGAACAAAGCAT  
ATAGAAGGACAGTGAAGGGTTTTAATTGCTCTCTCCAACAGGAGAAATAGGGGGAGCTGGGAAGAAGGGATGAGAG  
GAGGAGGTGAAGAGAAGCA

>Sequ01888SNP1

GTTGGTACACTGATCATTGTAAAGCCTTATCGACACGACACAGTAGTTGCTCCCTAAGAGCAAACCTTTCAGGCGCTGAC  
CAGGAAGGAGATTGTTACCTTAGCGAGCATGTGTGAAAACATGAGGCCCTCCATTACCAAACAAAGGAAAGAAAAAC  
AAACCTGTACAAATACTGAATAAATGAATAATACAAGAGTAGTTGTAACATGTACATATTCACAAATCCATAATCAT  
TTAACACTTTCCCAATTTTAGTCCAACAATATAAGTCATTTCCACACTTCAGACAGCGTGT

>Sequ01964SNP1

GTGTGTCGCAGGTTGTTTACAATGAACCCGAAGAAGACGTTTTGTGTTTTTGTGTCGTATAATCTGATTTTTAGGATATC  
TGCTGAACAGCGTGAAGCCAAAACCTCTCGTATACCTGTTCTGACTGTTACTGTATTCCCTTCATGCTAGTGTAAATGT  
ATACAGATCATGTCTTTTACTACTGAGTGAATGGTGGCAGCAGGTCGTGATTGCTGTGACTGCACCAGCAGCAGTT  
TGCTATCTTGTATATGATGGTATTTTTATCATGTGGTTGTTAATAAAAAGCCAAAGGGCACA

>Sequ01991SNP1

ACTTTTCAAAGTCATATTTATTGTTACATGTAAAGCACTTAAAGAGTAGACATGAAAATGAGACCAAATACAATTTGG  
CCACTGTACATAGAATATCATGAACCTACCTGGAATGAAGTAACTGTTTATATTTGGTAATGTTGAATACAAAAGGGAA  
AAAAGGAAAACCTCAAAGCGCAAAGGACAAGTCATCTCTATGACAAGAAGGCACAGCAGAAGGCAGGAGAGTCC  
AGTCAGCCTGCTCCTCATCCAACGTAACAGACGAAAATAAAAAAGACCAAAACACCAGACACCTCAATAACAGCATTTA  
CCTCATGTGATAATCCCAGAAAACAAAATGACGAGTACAAGCATAACAGACAGCACATCAGACTGGTCATTAATAA  
AATTTGACCACATGGCTCTGTATGCAGATATGTAGAAGTTTATGGCGCCAGTTATTAAGACATGCCTGTACTTTCATT

>Sequ02007SNP1

CTATCATAGAAATCCATCATAACAGTCTCCAATGCAGCAGTCACTGCAACTTACTCATTACAGTTTTAACATTATGGAT  
CTGAATTAGCATTGGCTTATTGCAACACAACACTTTCTTTCCACTTAACTGGTTGTTAGGAGAAGGAAAATCTACATT  
TTACAAATAATCCCCCTCAGCCAGAAAATATTGTACACGCAGTGCAAACGTGGGATTTCTGTAATGGAGACACCTTTGT  
TGTTAAAGGTGGTAGTTTACAGATCCAAATTTGTGCTTGTAGGCGGATGCTGTTTTTA

>Sequ02010SNP1

GCATCACACCAAGTAACTACTGTTAGTAAGTTCAAATATAGCACTTTGGCAAACAAAACCACAGAGTATAATTGTGCA  
GGCGAGAAACGAGATATGTAAGTGTGAAATCTCTATAGTTGTAGTGCCACCAGGATGTGTCATTTCCCTATCTAAAAG  
GCCTGCTCCCTGGAGTTTGTGCTTGTCTTCAAGTCTGCACTTCTGTGTGGCATATACTCAACTTCTCTACTACGGT  
ACAGTCAACCACCCACATAACAATCCATCTATTTCCAGGGTACTCACGGGACATTTAC

>Sequ02141SNP1

CTCAAAGCACTTTCAGTATAATAAAGGCAAATGCGGATTTAAAACATGAATACAGCAGCTCTGTTTATTTTTATCCTG  
GAGACTTCTGAGGCTGGTGGCAGTGTACCATCTGCAGCCAACCTGTCTGACATTTATGTTTCATCACAGCAGCTGAGAAA  
ATATCCCTACTGCCACCATCCAGGCTGAATGTAAACATCATGATACTAAAAAATGCAATAAAGATTCACTTTGGAAT  
GCATCAAATTTTCAAGCTCAGGGCAGATTTCATCAGGACATCTCTGAGGATTAATAACTCCAGTTTCATACCATTTTCAA  
TAAAACATTAGAAATATCTGTAATATACTACAGCCCTCTTCCAGCATTGTATATAGAAAATCTATGGAATGAAAA  
AGGT

>Sequ02164SNP1

GGTGACACCTCAGGAGACTACCGTAAAACGCTGTTGTTGCTTTGTGGAGGGGAAGATTAAACTTGTACATCCCTGCA  
GCTTCGTTACAGACTTCAGAGACAAACCACGAGACAAAGAGCGATCGCAAAGTGAACCTGGTGGTTAACGTCAGTCT  
CTATCATCATTGTTCTAACTGCCGCCACTCCTCAGCCAAACCAAGTGACCTGTGACCTCCCAGCCTACCAAGCCAGT  
CTTCTGCTCTCACGCTGATCGTTCTGCCCGTCTGAACTGAATTTCTTTTTT

>Sequ02181SNP1

GCATGTTGGAGCCCTGCAAACACATCAGTCTCATCTTCCACAGACAGCAGGTGGAGCTGTGACAGAGCAGTGGAGCT  
GACTTCAGTTTTATAACATGATGTTCTTGTAAAGGCCGTAATCATTAGAGAACATCGGGGGAATATGGTGTCAATTA  
ATTTAATATGTTGAATTTCTGTGCTGTGAGAGATGAGTACAGATCAATGATGTAATCAAACCTCCTCCCGTCCAATCA

GTGTCCAGACTCCATAAAGCTGCCGCAGGTCAGTTTGGTCTTCATCACATGAATAATAGAAACACAGCGTTCCTGCT  
GGTGTTCCTGCTCAGGTGAGAACCTGTTAGAGACATTTACTCTGAACCATCAGACTCAACTAAAAGCTCATAACT  
TCATCAAACAGCTTCTCTCCAGTGTCTAAAATAAACCTGTACATGTC

>Sequ02185SNP1

TCCTGTTGTTGACTTGTGTGCGTACAAGTCTGTCCCTGCACCTCGTCTTTCTCTCGGCATGTTTCACGCTGTTTCGGCC  
GCACCTCGGGTGTCTGTTGGGAATAGATCATTGTTAATCGTGTTCGTTGGGCGAAACAAGCCTTTTCAGAGCAATG  
AACAGTATTTACGCGCTGAACGTTAACCTTTAATGCTCCCCCTGGCCGCTGGGCTATATGTAGCTTTATCACATT  
ATGTAGTAGTGAATTAATGCTGAGGATAAGCCATGACCTCCAGTCATTTA

>Sequ02241SNP1

AACAGCAGTGCATAAAAAGTTTCAACAGAAACTAAACCAAATATAAAAATTTAAATACCCAGACTATAAATATTACAC  
TTAAACTGTATTGTTAGAGGTGATTGTTAAACACACCTGGCAGGTGATGAGATGTTTCAGTGTACTTGTGCAACACAG  
ACCTGAGATCGTGGAGATCATCCCTCCAAACACCACGTGGCTTCATAAACCTGTTAAAGGCTCTGAGGCAGAGATA  
GTCTGCTGGGCTGTACCCCAACTCTTCTATGGTACAGGACCACC

>Sequ02307SNP1

CAGTCATATGAAATTCACGGATGAATTCAGTCTTTTGTAGACCAGGAAGTACTGATGACTTGAACCTAAAACGACT  
AATCCTCCAATCAGAGGGGATAAAGATATCTTGAGGGTATCTGAAAATATTTACAAGTTTGTAAAGATCAAGTAA  
CTTTAAAGGGCAATTGAAAGGTGCTCAGGTGAAACCAGCACCCCTGCTGGTCAAACAGAGCAACACATAGAGTAA  
GAATCCAGTGGACTGTATGATAGAGGGATGGGAAAAGGAATGGGG

>Sequ02376SNP1

GTTTAAATTTAAAGTGTGCTGGTGGAGCGTCACTGTCTTCTGGTCTCATGTAGTTTCCACAGTGAATATCTCCCGG  
ACGATCGCTCGGTGTCAGTGACGCGTTCACACACTCATTGTTTACTATTTATTTCCCTGATGTTGTTCTATGTGCGA  
CAGCAAAGGGCCAAATAACAAACAATTTCTTCTTGTATTTAATATGAATGAACTGGATGATGCTGTGTTTATGGTC  
CATGTTTGATAATGCTCTGTATATACCTTATGATGTTTTACCT

>Sequ02382SNP1

CTCCCACTTTTGTGTAACCCGCACAGCAGGCAAATGTTAACGGTTTCCTCTTTGCACAGAAACGTTAAATGTCTAAG  
AAGTTCATTTTACTGTCATCTTCTTCAACGATATGTACTCCGACCCTACTGGTATCCCTTGGAAAATTTGTGATTA  
TTTTTTTTCCCTGCAAAAATGGTGTATTTTTCAAGTTTGTGTATATAATCTTGTATACATATTTGTAAAGTTTGTAG  
TCGGATATGTTGGCTATAGAATAAAAATATTTGTGGTTTTTTG

>Sequ02391SNP1

GTGGGATTCAGGCAGTGTCTGAAAAAAGACTGTCAGCACTTGACTTCTATAATGGCTACCTGCATCAGACGGTG  
AAGAAGACACCCCATGAGACAGCTGGAGGACTGTTTGTGTCAGTAGACAAGGAGGAAGTGTAGCACATCAGAGGAGAGAA  
AAATTAGTGTGTGATGTTTCAACAATAATTTCTATTTCCCTGATGTGAACACTGCAGACATGACATCACCTAATGGAAA  
TGACTTTAGTTAAGTGTACTCTCACTACTTACTGTCTGTTT

>Sequ02423SNP1

GCTGGGGTGTGTGAGTGACGATGTGGATGTACTTGAGTGAGCGTGTGACTGTATGTGCGTGTTTAAGGGACTATGAGA  
ACTTGTGAGGTTTAGAAGCGGCTTGGAAAGCCGTCGTGATAGATGGCTGGCGAAGCGTCTCTCTGTGCTGACAAACGAG  
AGAGACCTGCCCTCCCCGGTGAGTCTCGGTCAAATTAGCCCTATTTATTTAAATATATAATATGTGTGCCTGTAC  
AGTCTGTGCAACTAGAGAAATGCTCCAAGGAGTCTGTTTTTGAAGTTTATTCAGGTAGTGTATTTTTTAGTCT  
GATTTCTCATTCAACATGTCCATGGTTGGTAAGCTGTAACCTGAAAACATCACCAGAAAATCTGCCAATTAATTTTCAG  
ATCACTTCGTAGAGGAGACAGGCCACTCTGTGACATGAGGGTTGTTG

>Sequ02443SNP1

GTATTTAAGATGATATTTATTTGAGGGCTGTGCACCACGTTACATACAGTCTGATATACTTATGGTGTATTATGACAAAA  
CATTTGAAAGTATGCTGAGTTAATTCAGACACACATCCTCTGTTAGCTTTCCCGATTTATTTCTTTCTTAGTCTCATC  
TCCATATTTGTTTTATAAAAACAGCTGTTTGAAATATGGACTTCACAAGGTAGGTGCTTCCAAACTGGTGCCAATGAGT  
CCAAATGACAAACCATATCTGGTAAAGAAAATACATTTATGTAGTGTTCAAAACAACACTGAAGAAGGAAGGGAGAAA  
ATGTGAACATCAGTGTCCAGCTGGGTGAGATCAACACGGCATGCAAGCATCACAGAAAACACATCATGAAGTCAGAA  
CTTTTCCATGGAGGCTTTTATTTGATCCAAGGTGGTGTGAGTGTGTTGTGCTGAACACATTAAGAGTAGACTTCAA  
ACACATGTGTTTACTTTTTAGGAATCTCCAAGTCCGGCAAACCTGTTTCACACCGGCTGCTGTTACCCGCTGCTGCG  
ATGCGGCTGAGGGGAATGAGCTTCATGGTGGTCTCTTTTCAGCGAGTACCAGCGGTTGTGCCATGTGACCCAAATGATG  
CCGTTGTCGAAGCCGTATTCACCTGCATCCTTTTCTGTGACCTGCCACCCCTGGTAGTATTTGCCGTTCAAATGCGCA  
GCATGACACCTGTTTATCCACCAGCCAGAGCCGCTCCTGCTGAGCACAGCTGCCATCATACTTGTCAATGCTCCTGTCA  
ACGGTACTGAACTGCATGCCGTTGTGAGATGTGTAGAATTTGTCGCTGGGGTCTCTCCAAAGTCGAAGCCATCGAAA

>Sequ02608SNP1

CACCTGAGAGCAGGTCACGCTTGCACGGCACTGACATCACTATTCACGCAGAACAGACACAGTCTCTCCGCGGTTTA  
GGCCGGAGCCTGGGACCAGTGTGGATCCAGCTCCTCTGGGCTACATCTCATTTCTGCCTCACACTGTTTACCCTGCTACA  
TCACTGAAGTTATTGCTTTGAGAGAGAAGTGCATATATTCAGAAAGAAATCCAGACCGGAGCTTTTCTCTAACCTCC  
ACTTCATAAGTGAATATTTCTCTGTCAGAAAAAAGTCTAGCTGCTTTTTGTTTTTTGATCTACGCTGTAAGAGCC

>Sequ02708SNP1

CGGGCAGAGAGCCAGGCAGGCACCTTACAGCTGGGTGTCAAATCGTACGTGGGGCTGATGCTTGTAGGTAACAGAA  
GCACGAGCTGCATTTTAAACCACAGTTTACGTCACCTGCACAGCGTTCAATCCCTCTCTCCTCACCTGGGCGGCTTGT

CTACTTTCTCTAACTATTTCTATGATGTACCATTTTGAACCTGCACTGAGCTCAAATAAATTAAGCACACCCCACT  
GTCTTGTGTGTCGTAACAAAGACGCAAATCCAATGCTAAACATTTGAGAATGACGATCATTTGACAGAGCCCACTGT  
AGCGTCACGGCTCAAGGTTATTTATTTGCGAGGCGTAAGTCTGGTGTGCCG

>Sequ02728SNP1

CAGTACATAAAACATGGAAAATCATGAAAATTATGATGAATTTTACATGTCTCCAACAATATATCAGTATTATATTAG  
ACATGGAAGTTATTCACAAGGCCGGGCATCAGGTAATGGTTCACAACGATCCACAACAGCTCGGACTTCTCCAACCTG  
GACACCTTTGTACGTCCAGAGATGGATGTCCATCTGGTCTCTCCATTGCTGTAGGTGCGGCTGAGGCGTGCGGTGAA  
AGGGATGTCTGCGCTGTACTTATATGCCA

>Sequ02738SNP1

ATTACAATATCCATGTTGATGTACATTTCTAGGGCTATATTTCCATAAGCCCCAACAGGAGAAAAGATGACTAATCAG  
GCCTCGCCTCAGTAATTTAAAACAGGCTATTTTCCAGCAACAAACAGCAGGTGGACAGGCCAAGAGTCAAAGGTGAAGTC  
AATGGTTCGGGCTCTACTTGTATCTTGTATGCCGATGATCCTTGCATCACCCTGACGTCAAAGAAGTGTACTTGTATGTC  
CCCCAGACGGTTGGGGAAAATTCATCATGG

>Sequ02745SNP1

GCAGGGCTTTGCAAGAGGAGAGGAAGAGTCTTTATGAGAAGATGCAGGGAGCTGGAAGTCAACCAAGCGTCACCACTG  
CCGAACCAACAGAGGAGAAGGTCCCCGAGGTGCAGCAGACCGCTAAAGACCCAGAAGCCGACCACCTGTCCAGAATA  
CCGAAGCCACTGATGCCCCGCTGGGACCCCGACACTCAAACCTCCACTGACCAAGGAACTGGCTAAAACGAAAGCCG  
AGCAGGCCCGTCTGAAGGAGATTGCCGGTCTTTTACAATCTCTCATGTGCATACCCACAGAAACAGTTCGCTAGCCAA  
CACAAGGACACTCTGAAGGCGTCCAGGGGCCAGAGGAGAACCACATACAGGAGAGCAACGGCGAACACCTCCAGGAAG  
CCAAGGAGGATGGATACCAAGAACAGAGAGATTTGAAAATGGAGTCAGTTGATTAATGCTGCAACGACTGTGAAAAGA  
AACCTTG

>Sequ02760SNP1

CCTCCATACCTGAAATTACTTGAAGTGTGAGCCTGTGATGTTAATGATACACTTATAAAAACCTCTTTACAACGTTAG  
GGAGTGTAATTCAGCGCTGACATATTAACATTATTGCTGTTAAACGTGTCTGTGTACCTCTGGGTGGAGCCGCGT  
GATACGAACGAACACTAGCACATAATAAAGCACAATGATGTGAGAAGTCCGGTAGTCTGTCTCAAAGAGTCTGACT  
GAAACCATCGGTTGGTCTAAAGCAGCTTAGACACTGTCCATGAGTTATATTTAATAAACACAAATGTCAGCTTT  
AGGTTTAATACCTGCTCACTCTCTGAATATGTGGCCTTTTTACAGTGGAGCAGTCCGGACCGCACCTGTATACAGTTT  
GCGAAATAAAGAACGGCACTCAGTAATTTCCAGCAATAATAAATATTGTT

>Sequ02777SNP1

TCTGTGTTATTTGTTAATAAAAAGTTAAAGAATTTACATATATCTGCAAAGATCACACTGATACTAAGGAGGCTCTGG  
TGTGCCTTAGGGGCAATTTGAAAGCTGTGATATCCAGTGACAAGTGTACATTCAGTGACAGCCCGGGCACTCTTGAATG  
TGACCCATGCTAAAAGATTTCTCTCAGGCTATAGTGAGCAGAGATATTTGGCACAACCTCACTAACACTTTGCAAGA  
GTGAACCATGTCTTCACATGTAGTTCACACAGTACAATTTTCAACTGGTTCATGCATCATTTTAAACCCCTGGAGACTAG  
TCGTCAATAGGCTTCTTCTGATCATGATACAGAGTGGGTAAAACATTTTGTGCATCATTTTAGTAGTACAAGTAT  
CTGAATAACAGAAATACATGTTTCCAGAGATAAAAAGCTTTTATCCACCTCCACCTGTCAACATGATTTAATCCTACTTGT  
CAACACATTTACTGTGTAACACTGTATGTGTCTAAATGTGTCTGAAACTAATGCATAATGCACAATAAAGTAAAGTG  
ATATGAATGT

>Sequ02797SNP1

CGACATTTGACTACCTCACAACCTGAATGGTGTGCAATGGTGGCAAAGTGAACCTACCAATCAGAGCCTGAGAGCTGTG  
CTGGTGCAGCTGCTCCACATGTCATAAGACTTGATGTGAGGTGAACCTTGCAACCAACATTTGCACAGGAGCTTCCTG  
ACCAGCCACACCTCTGCTGCGGAGATCCTGTAGTGTCACTGCCTTCTGCTGGTAGGATAAGGAACAACAGTTGCTACC  
CCATGATCAATTACAGTTTAAACCTTT

>Sequ02834SNP1

TTTTCTCTGTCTTGTCTGCCACAGGGGCCACCTCACTGTTTTCTGTTGTTTGGTGGCTTTTACTTTTCACTTTTGA  
GCTTTTTCTCCTTTCTTTTCAACTTTATTTTCTTTTAGTAATCTCACTTTTGGACTCTTCTCCTGCCACAGCTT  
CTTTCTGGTGTGTTTLAGAGTGTGGTGGGTGAAGATTTGAGACTCTCTTGTGCTCAGTCTTGTATCTCATTTTLAG  
TCTGTTTGTATGATGGAGGTGGTGCACCAGATGATATGCTTTTTGGGTAGCCACTGGGTATCGCAGAAAGTCCAGGT  
GTTTCAGTTTCTCGAGGCCCTCGAAGATTTTATTTCTGGGGTGCATTTCTGGGAACAGCACCTGACTATCTTTTCTG  
ATGGACGGTGAGG

>Sequ02890SNP1

AAACAGGCCAGTGTGTTGAGGCACTGGTGCCATGTTTCATGTGCATATCACAATAAGCACAGGAGTGAAGACCCACTAAA  
CAAAGTCTGTTAGCGAGAAAGCTAACCGTTAGCCTGCGAGGTTTGGACATGGGCCACAGTCTCTGACAGTGGGACTTC  
ACCGACAGATTGATCAATTGATTAACATGTTTGGACGTCCACATCCAACACGGTGAGGTCAATTTGTTGTCACTGTGAA  
ATCAAATAATACCCACCAACAAA

>Sequ02929SNP1

CTCATAATTTAATTTATTCATGGACACAACTCACAAAACCATTTATGGTTGCACAACAAAGAATTAGTTTCTGCAGAC  
AGACGGGAATGTTTAGCATACTTTTGTATCCTCTTTTTTATAATACAAATCACAATAAATACAAATCAAACAATTTA  
ACACAATAATGTTAACATCCACTGTATTCTCTCAAGAGCAAGGTAGAGGAAGCAAGAGGGGAAGAAAGAGTCAAAGTC  
CTGGAGGCAATAGACAAACATGTGAACGCTGCCTGTGGCCAGAGTCCATCTGATTTAATTAACAGCAAACTGACGCC  
ACCAAATACAGCAGTTTCTTTTATGAAACAATAAACAGGAAGTGGACAAAAGTAAGAGAAATCCCAGACTGTAAAATCA  
ATGTCATGTACTGACAGGATTTTAGGGCATTATTTATTTTGTCAACATCCATATAGAAACATCTTTCTTCTGATGGAA

ACCTCCCTTTTCAGTGGGGGTGGATATTACATATCATTATTTGTAATAAAAAA

>Sequ02941SNP1

TTGCTCAGCAGTAAAAAGTACAGTGTATACTACAGTACAAAAATACATAATGTTGAACACTGCTCCACCGTGCCACT  
GAACGTTTTAGTAAAAATATCCACTTTTTTCAGCGTGCAAAAACAACAAGCCCAGCTGTGAGCATCCAATGCAGGAAATATC  
AATATGTTTAAACCGTGTATTACCACCACCGCTTGAATCAGTGATTTTCAGAACACATCGCACAAATGCAGAAAATCT  
TTAGCGACAATAGAGGCAGC

>Sequ03235SNP1

TTTTTTTTTGGTACAGCAGGTGTTTTCTACTCAGTCAAGACAAACAGTAACAGCATACACACGTAGAACATTTTTTGAT  
ATAAACATCTTATTAATCTCACAATTAAGAGTTTATCTTGCCATTGCTTTGATCAGAATATATCTTAAAGTCTGACATT  
TTGGTTTGGTGAAGGGACAGGCTTTGGGGCCTCCAGAATGACGATGAGTTGAATACATTTATCGATGCTCTGGGTGGG  
AGAACCAGTAACGCAATCAAC

>Sequ03290SNP1

TGATTTCCAGAATGTGTTAAATTTGGTTGTGCGGTGATTCTTTATCCTATAAATAAAATTTAAAGCTCTAAAAGATT  
AAACACGATTTTCGTTAAAGATTTCTTGATATAACTTTTTGTTGTACTGGGTAATATATTGTGATGAGAGACAGGAAAT  
GATGACCACAAATGTGCTTTCCACCCTGCTAAATGTCATCTTTGACCACAAGGGGGCACCCCAAACCTGCCTGTTGA  
GACAGAAAGCACTGGACTGTGTATTGTTTTGTTTATGCATCTTAGATATTTTGGAAAACCTTGTATTTCCAGAGGC  
CTTGCTCTGGTATGCAGCCTGTAGGAAATTATAATAAAATACAGTGGT

>Sequ03312SNP1

TAAAAAAGCTTTACAATTTGAATTTCTCCAGTTAGAATATTCACAGCATTACTATTTCAGTTAGGTCTAAATTTACACCT  
TTAATCAAGTGAAACTACTATGACCATTTATTCACAGATTCACAGACAATTGAAGTATAATCACTGGTTGAAACTACA  
AGGGTCAGTTTCCCTCAATCACTGTTGTATCAGCAGTGACTCTCAGTAGCTTGTGTTTTTGGATGGTGATCTTTTGAG  
CCTCCTTTATCTTGAATCATTGATACCTGACTGAGTGCATCGCCGTTAGAGGAGAGGTGCCAGTATCTGCGGTCCAC  
TCTGTCTGGCTGCTCTCCATTACCACACTTAAGAAAGTCCCCACAGGCTGGACTCCTTCTCAAACGTGAAGCCAA  
CATTTGTCCCTTGAGAAGTTCAAGGGCCTCCAACAGAGACCTGCCCTTTGGCACATCAACAGAG

>Sequ03369SNP1

TGTTTTACAGAGGAGCACATTGTTAACATCAGATAACGGCAGACAGCAAACCTAAAGTAGTGACATTGGAACAGTATAT  
ACATGTTAATATATCTAAAGCAAAATGAACCACTTTCTGTGACTTGTCCACATTTGAAGCTGTTTGTTCGAGGCGGA  
TCGTTTTTAATTTGGCTTTAATGGTTTTCTCGATCCAGTCGACAAACTGGAGACTCGAGCGTAGACGCCAGGTTTCAT  
GGCGTTGGCGCATCCCAAACCCAGGACGTGACGCCCTGCAGGATATACCTGTTCTGAGCATGGCACACCAGAGGACC  
ACCGCTGTCCCTGGCAGCTGTCTGTTCCCTCGATGTTTCCA

>Sequ03370SNP1

CTTTTGGCAGCAGGATTTGATGTTTTGTGTTTTACCTGATACAAGCCACTTGAATGTTGAAGAACACGGTTATAACAT  
ACAGCCAGAAAAACCGCACTGTCTGTTTGTGTGCGGCTTCTCATGAAGATCAACCGCTCTGCAAATTAGAAACAAAA  
GAAATCTTGTTTAATATTGGCTTCTCTCAAAGAAAACGCACTGTCTCAGAATTATAAAGCTTTAATCGGACTTAA  
GTGGAGCGAACACCAGTGTGACTCTAATGTCTTTAATACTGTATTAGTCAATTTATAACAGTAGAAACACTGAGTGACA  
ACTTCATTTGATCAAAGTCAAATCTTGTACCACCTAATAAAACGCTTATTGTAACAGTGCTGTTTCATTATGTG  
CACCAGGTACGTGTGCAGTGTATCTGTATCGGCTCTGTACAGGTAATGACAAAATGTTATT

>Sequ03384SNP1

CAACCTCAGTAACACATGCACTCAACACAGAGACGGCAGAATGACAGAGCTGAGAGGTCAGTGTGTCTGGACCATGAC  
AGCTTTGTTTCCATACTGTCTGAGACAGACGGGGTGTAGTGTCTTCCAGGGTTGTACAATATATTTAATGTGTTCAA  
CTGGGTATTACTCTCTCCTCAGCTGGGATTCGCATATACATGGGGATGGGGAGGACAAACCAGCATGGACACCTAAT  
CCACTGCTGCCGAGAAACATCCTGTGATCAGTACCACCGCTGTGAAGCTTCTAATGAGACAGTCACAAAACCTAAACG  
CTTACACAGGTGGTATGTGTTGCAGGGTTGGAGTACTGGACTGTATCAGATCACACAGGTGAGCATGACAGCATCCA  
CCTCTTCAACATGGTATAAGTGATACATTTTCTAAATGAAACATATTTACAGTGAGATCACAGAGAGAAGGGAGATC

>Sequ03443SNP1

CGGGATTTGAATGCATCTTGTCTATTGTTGTACATATACCTAACACTTGTGTTGATGTGTGTATGTTTGTCTTTTCCTG  
TTTGACAATTTGTTAACACATGGATTTTTCTATAAAGCATTTTCTTGTCTGATGTAGTTTCTAGGGTAATGTTTGTAGC  
TGATTTCTTGCACGGGATGGGCTGTGGAAATGGCTACTCTGTTGATGATCAACATTCGACTTTAAGCCTGAAAAACTC  
CAATTTATCCCAATAAGTTTGTAGCTTGGTCAATAATGAATAAAACATACAGATTAACAGA

>Sequ03490SNP1

AAATAGAATTTTTATTAACCACACCTGAACACAACATTTGTTCCCTGGCTGATTAGATGAGCTATAACTTAATAACATA  
GGGAGGTGGTTTTACTGTGATGTCATATTCAGGAAAACAGAGGGTTCTTGTGACTTCACATTAATTCAGACACAAT  
CTTCTTAATTACTGGCATTAATTCATTTAAAACATGCTTCTTCTTATATGTGCTTGAATGACATGAAAGAGCAGGAAG  
TCTGACAGAGGAAGCTCTGCTGCCATGTTGAACACATGGACACAGAGAGATTAAGTTTCATACCTTTACTGATGAGCC  
AGAGCATCATGACCACTCTCAGGTGATGCTGCTCATCTTCTAACTACGCAGCATGTTGAGCTTTGGAGACATATCAAC  
ACGTGTTAAGACCTGAGCCACTGTGCGACAGTATGGTCAGACTACCGGGCTGCTCCGGGCCAGCAGAGGGCCCGGGACA  
GGGCTCTGAGATGCTTATGGAGGAATGTGACACAGCCACAGGTTGGTCAGAGCACC TTGCTGCTCATCATGTTCTGGC  
TCATCAGTGAGGTACCTGTAGAAGCAGCTGTGAAGTGGTTTTCTGCAGAAGCAGTGAGACATGAACAGCATTAACACCT  
CAACATTTCTTTAACACACACACACACACTGTAACGCTGGACTCCCTTTAGAGTGTATCTGTGTCAAACCTCAAT  
AAAATGCTGAATAATAAATATTTAATTGATC



>Sequ03558SNP1

CCGGTTTACTGCTACATATTTAACTGTATTTAACAAAAACATATAATGTTTTCTACATGTATTTATGTTTGTCTGAG  
ACGTAATGCTGATCTACGCTGATAAGATCTAGGCTTCATACAAACCTGACGGGTGGATTTAAAGGCCTCAGTGGAAAC  
GCACATGAAATGGACCTTGCTTGAAAAATACATTATGTATAGCTTATTAATTCTGCCATGTAACATAAATTTATTATTC  
ACCTCAGTGTATATTAAGAAGACTCTATTTTTGATAGTTTTCTTTCTTCATGTAGAAGAATTTAGTACATTTTTCTCAG  
TGTTTATATAAACGTGTGTTTTGATAAGCAATTTTTTTTT

>Sequ03570SNP1

GAAAACCTCCTGCTGGTGTTCCTGGGTGTCAAACCTGGGATTTGAGAGAAACTTCCCTTCAGCAGATGAACGTGAAAAC  
AAACTCTGCTCATACATGATTGTGACTGATGAGGCTCTGTCAAATAACTGGAGGCTTTAACCTGAGTATTGTGAGCTA  
AATGTTCCCTCACAGTAAACATCCTCACTATGTACAACACCTACTTTACTTTGCTGTTTTCATTTTCTGGTTAAATCTAT  
AACTGTGCTTCATGTTCTATCAGCTGATGAAATGTCGTGTATGTTACATGCAAAATGAATGAATGTACTCAGTTGCTGA  
TTCATTTATGAAAAATTATGTGGAATAGAATACTCTGTTAGAACTCTTCTTTGTTGCTTTGACTTCTGAACTCATGT  
AAACTCAGAAAAATAAACATCTCCAGAATGAAATACACACAGATTAACAGATACACTGAGGTTAGTAAGGAGGAAGTGAC  
TAAGTAAAAAGGAAAAACTAGAATGAGATAATAAACAAATGTAAGTGAACAGAAAAATGTTCAAATGCAAAACATTG

>Sequ03648SNP1

ACTTTATTTCTTTGCTGTTATTTCTTGTGGTAAGAAACAAGCAGCCACTTACAGATTAACAGGTTCACTGTCCAACACA  
ACAAGAGTCTACAACACACACAGCCACTGACCAGTCACAGTGCCTTCAAACAACAAAACCATCCAACACTAAAATA  
ACGTTGTTGTAGTTAATCGTATAAAAACAGCACCAGTTGTTGTGAACCTGTGGGAGAGATTTCACTCCTCCGTCTCCAT  
GTGGTGCCTTTCATGCATGGGTGTTGGTGTGGCAGGGGTGATTCACATTTGGCACATTTATTTCTTCAACTAAAAAAAC  
AAACAACATCCTAAATATATAGTACACAGGCATGAAGACGTGATCATGTATAAATATAAATACTGCTAGGCAGGAATG  
AGACATCATCAGGAGGTGAGAGGATCAGTGGTTTTCTTACGCTGTGCAGCTCAATCTTCTGCTCTGTGGAGACACA  
CTACTCCTTAACAATGACATTTTATTTTCTACTAATAGGAAGTTTACTTTCAAATGCAGTCCATGAGATGCTACT  
GAAACTCAACAACATAAATTCATTTCTGTTGCTTACTTTCAAACCCGCT

>Sequ03661SNP1

CTCCCTTCATAAATTCACGAAACTTTTGATACTTTTCATTGCTGCTTGTATTTTGGTCTGTTATTACATTTCCACTGC  
CAACATCTTCTATCAGTTCAGTGTAAACAAAAAATCTGCCCTGTGTAACAGACTTGACTCTTTCAAGCTTTTGATG  
GTTTGATTACCATCTGGGAGCAATTTTCTGGTTTTAATGCTGCTTTCCAACAGATTATATTAAGGAGTGCCTTAAAT  
ATATGTGTAACAGAGTGTCTTTGGTGTGTATCAATGTGAACATGTGTTTCTTAAGATGATTTTGTCTAGATTTCTA  
TCTGCTTTGCTTTCAGTCTGCAATAAA

>Sequ03720SNP1

TCTTCACTTTTCTCGACTGTTTCTTCTCGGTGTGATCCTGCTGCTGTCTCGTCACCTCTTTACCAAACACAGGTGA  
CCTTTGGCCTCAGATTGAAGAGATCCGTAGCTGTGACCCGGTGTGAGCTTGACATGGCGCAGGAGGACGTGAACTG  
TTAGTTCGTAGTTGTAGTAAACATGGATGCTTAGAAACCGCATGAGCTGCTGTGTGATGTTGAGCTGATGATCAACATG  
TCTGCTTGCTTCGCTGCACTGTAGATTTCTACAGATTGTTTTTTGTATTCCCTTTTAATAAACACTCCAGAACAAA  
CAAAC

>Sequ03866SNP1

GGGAGAGGAGGAGGAGGTGGAAGAGAGGAGGGGCGAGGAGTCAAGGGAAGGAGGAGATCAGCAGAAGGCAGAGGT  
GGAGGAGGACGAGAGGAGAGTTCGTGGCCAGAGCCAAGGAGACAACGTTTGTGCTCTGACCTGGGTTCGTGAGACGGAC  
GAGGCCGCTTCGTTCCCGACTACAGCGAAGGTGAGGGCTCGGAGACGGAGAGGAAGAAGCGGCAGCCAAAGTCTG  
TCCCCAGCCAACAGTCCCACAGCCCCACCCGAGCAACCAGAGCGACACGGCAACCACCATGGGAGACAAGAAGAAG  
AAGAAACACAAGAAACATAAAAAACACAAAAA

>Sequ03932SNP1

GAAAGTAAACAAATGACAACCTTAAGCCAAATATTTCTTCAATAAATACCTAATGAGGATATTTTTGGCATAACTTAACT  
GATGTAAGAAGAAATGTAAGAACCACACTGTCAAAGGCATAAATACTGCTTCACTGGGTGGAGTAACTGCCTGTAGTT  
AATTTAAGCAGCACCATCTAGTGGTAACCGTTGAAATGTATGTACAAACCTCCCTGTGCATGACAGCGTCTCAGTAGA  
GTTCAAACAACCTCATAGGCTTCATTATGACAGCGACAGTGCCTCGTTCCCTGCATTGCAGGAACCTTACATTGACT  
CCATGAACAACTCGACTAACCAAGTGACATAAAGGCTTCTTGTTTTTTTCATTTCATGGCAGAAGAGAAGAGCAGAGTGAG  
TTCAAAGGTATTATATAAAACAGCATGAAAGGTAGAAAGAAAAAGTATAGAGTGAAGGAGGAGTTGGCCGTGAGCAGA  
GCTACGGGAATAGAAAGTGCACAGGTGATGTGATGTCAAGGTGGATGTGGAGGAG

>Sequ04107SNP1

CTTTTTTTTTTCTTCTTCTTGTAGAATGTAATCACCAAACAAGTTTTGCTCTTTACAGATATACAGTATTATGTATAC  
TATAACCTTCCGTGCGGTGACCCTCTGACAACAGTGTAAACAGAGAGAAAGAGCAGTTCCTGCTCTTACAGAAACACAT  
GCAGGGAGTTGGGAGAAACATGTCAACTGTATGCCAAGGTTTAGTAACAGGAGACACAGTAATCTGTCAACATTTTGT  
CAGATCAGATACTCTGGTACTGTTCTGCTCTCAGCTGAGGTACCCCGGAGTTGCAGCGTCTCGTTTTCTCCACAAGA  
GGGTGATAGTGACTCAGTGACAACAAGGTGAATGCCCTGGCGATACGAAGAAAAATCACTCTGGGTCAAACACAGGAC  
TAAGATACTACCAGTACTACTGTTTCTCCTCTAATGAGTGCAGTTAATAAATACTTAGTCTAGTAAACAAAAACACAG  
TTCAGAAAAATCACACCTACAGTTAGTTGCTGGTAGGGCATATCA

>Sequ04195SNP1

CAATAAAACAAGATGAGATAAGAAACACCTGAGATCATTTAAGGTTCTGTATCAAAGTTTTCTCTGCTGCTGAGGGTC  
GACCAGGTGACGCAGCTTACAGCATCAGGTAATGACACGTCAAGTGTGCTATCAGAGAGCTAGCTGTTAGCATGCTA  
ACTTCACTAGTACTTATCATTGGTGTCTTTTCTCAGCTGTTGCTCCAGAGGAATTAAGTTTTTCTAGACTGGTAAGCA  
AACAGCTGATAATACTAATGCTAATGCTAACGTTAGCTATGTAGCATTAAGCTTAAACTTACATACAGCTCCTTTAAAA

CAAATATAACTTCATAACCTGAGACCCAAACAAACAGAATTCATAAATATATCACACACACACCTGAGCAGAAACCCAA  
CGAACAGAAATATGTTTACACGCAAAACAGCTGATTACAAAGCAATCCATCAATCAATCAATATGTTGATTCAA  
TAATTGACTTTCCACAATATTGAAATGATTGATAATAATCTACTTTACATTTGACAGGAGGGGGAGG

>Sequ04554SNP1

AAAGTCATTATCATGTTTATTTTTGCGTATTAGGCCATGTTCTTTTCATAATGTATTGTGCTTTTCAACATAAAATATA  
AGCTCATTACTTTATATCACATTCATTTTCATATTTCTTGAACAGGAATCTCCATAAGACACACTGCGATGCACTGA  
TATCAGGTTAAGGCACTTATTTGGGGCACAAGCAAGATGCCCCAGTGAGGCAATAATTTTACCAAATTTGTAATTTAA  
GATTTTTTTTTGTGAAATTAACATCCACCATCAATTTTTCCCTCAACATCTCATGAATAGACACAATCAGAAGTATCTA  
TTAGAACAACATGAGTCCCCA

>Sequ04627EST3

GGATGTTTCATTTCAGCATCTTGTTCGGCGGATAGGTTAGAGCTGAGAGGCAGCCATGGCAGCTCCCAGCAGGAAGCAGGT  
TTTCAAGTTTTCTCAGCCAGTTTGGAGCGTTTTGTTTTGACCCGGTTTTGGATTTTGGAACTGCTTCTGTATGTTGATGCT  
GTTTGTGAGAGAGCGGACTCAAAAAGGAAGCCAGACATCCATGTACCCTACCTGTATGTGGATATGGGGGCCGAGT  
GCTCTGTGCCAGCTTCATGTCAATTTGGGGTGAAGAGGAGGTGGTTTTGCAATGGGTGCTGCCATAACAACCTGGCCATCAG  
CACTTATGCATCGTATGTTCGGAGAACAGGTGTACTACGGGGACTGGCTTAAGGTACGAATGTATTCCAGAGCGCTGGC  
TATTATCGGCGGCTTTCTGGTTCTGGCCAGTGGGGCGGGGAGGTGTACAGACAGAAACCTCGCAGCAGATCCCTGCA  
GTCCACGGGACAGTTTTTCCCTTGGAGTCTATCTCATTTGCACGGTGTACTCCCTCCAACACAGCAAAAGAGGACAGACA  
GGCCTATCTGAACCACATTTGCTGGGGGAGAGATCACTCTGATGCTGCTGGAGGTGCTGTTTGGGGTGTGGCTCTGGC  
CTTCTTTCTGGCTGCTACATCCGCCTGGCCGCTCAGATCCTGGCCACCGTCTTCTCTGGTGTATCCTGCTCATTGA  
CGGTAACCTGGGCTACTGGCACAACACTCGCAAGGTGGAGTTCTGGAACCAGATGAAGCTGATAGGACACAACGTGGG  
CATCTTTGGCGCAGCGCTGATCCTAGCTACTGACGGCTGAACCTCGGGCTCCACAGACAACCTTTTTTTTGCAGTGGC  
CAGGATGAGATTGTCTGCCTTTACTGTTTGTCACTGCCCCGACTTTGTTTTCAAAGCAGCTGTGGTTCAGTGACCTCTC  
AGGATTCAGACTCTCCAGCTGAGACAGTTGGATGAAAGCCAT

>Sequ04666SNP1

TACAAATTTTTGCTCAACTTTTCTACATATTTAAATATTTGATGTTTTGCCAGGCTTGGTTCTTTTTAAACAGCGGATG  
TAAATGTGCTTTTATTTGCCTTGACTGACTCATTTTGTTTACAAAAGAATAAAAAACATGTTGAAGGCACTGCTGTTTG  
TGCCAACCAACCATCACCTCCTCTGCTCATTCAAATCATCTGATGTGAGCGACCTGTCTGAGCATGTTACAAAATA  
CATCAGAAATGCAGTTCAACCAATTGTATGTGCCACCTGGAATAAACTGTGAAGGATGAATATGAAAAAAACTGATG  
AAAACAACCATATCCTTATACAAGGCAACACTGGTGTCCAATAAAAAGAAGGAAAAAT

>Sequ04834SNP1

ACTTCTCAATGTTAAGTTCTTTTTATGAAAAATGAGTTTCATAATGAGCTCTGGATCATTAAGAAAAACATTCGTCAAA  
TTGGGAAACCAAAACATTTATCCTTTATGAAAAATATTAGTGTACAAAAGAATAAGACAGTGTAAAGATGCAAAGGGCA  
GGTATTTACATAGGTCTTAACAAACTTTATTAATACATGAACCTTACTGTATTCTAGCATACTGTAGTAACATCCAGGG  
GTGTACAACCTGCTTTCTATAAACGTTCAAACGTCTGCTGATTTACTTGTATGGCCAAAGCTTGCATCTCTTGATTTTAC  
TGATGATCATGTTTTACCAAAGAGGCGAAAATAATAAAAGTGCCAGGCAGATTCCTCTGGATCGCCATCACGCACAGA  
TAAAC

>Sequ04914SNP1

AAATCTCAGAAATCACTCAGTCATTAACAAATAATTTAATGCAGTTTTGTACAAAGCCAGAGACTTGATTCCCTCGTATG  
GACAGGCACGCAGAGAGAAACTACAGGCAGCGTCAGGTGAAACCTCGTTCCCTCCGACAGACTCTCAACCATCAAAAC  
ACTTTCATTTTTAAATAAGCAGCCAGAGACTGAGAGGAGGCGGGCCCGACTCCGCCGCCAGGAAAACACTCAACGT  
CCGGATGGAGACGAAGAACCGAAGAAAATCTAATGAAATGAGCAAAGTGAATCTTTCAAACCTAAACAACAAGAATAA  
AACATGAAATATAAAAG

>Sequ05002SNP1

CGGAAATATTGTAGATAGTGTTCATGGATACGGGAATAAAC TGGGACAGAGCAGTTAGAAGCACAATGGAAGTCGCT  
CCTTTCTTTGTGCTGGAGATCCCTTCTTTTATTCTGTGCGCATCAGTTTCCAAAAGAATAGTATCAACAGAATTTATC  
AACAGCTCGAATAAAAAGAAAAAGACGATCCTGGCACTTAAAAGGAAAGAAGTGAAGCTCTGTCCACGTCAGAGGAGGG  
AAGAGCCGCGGATGGAAAAATGGGGCGGGTGGAGCCGGGGCTTCGTTCTCCATCATTCATCCCTCACTGGGCTGAAAC  
GAAGATTAACCTAGTGGTGAGATTCTTTATGTGAATCCAACCTGGGAACGAACTAATTTGTCCGTCACGGTGATCAAC  
TTAAGTCGCATTCACAGCAGCGGGCGTCATCTGCTTCCCCGCTACGAGATACAGGAGAAGTTGCATAGTAAAAAAA  
GAAATAATAATAATAAAGAAGAAGAACTGTTGCTGTGTGTTTGTGTTGGCTCAATTCATTCAGTCATTTTTATCCCA  
TATTTCTATAAAAAATGAATATAAACTTCTATAAATCCAAAAA

>Sequ05005SNP1

GCAACTTCAACACATGCATCAACTGTTGCAGGTAAAAATACATTCATTTGGTTCACTTTACACTTGACTCTGTCTGAA  
GCTGAAGCGGTTTTCAAAGCAGCTGACAGTGACCGCTGTCAATTAACACAGGCATGCAAAACAGTTCTGAAATGACGA  
GTAAGAAAAC TGACCATTTGTAATCCTTGTGCTGCTCACTCTGGGGTGTCCCTGACCTTTATTCTTCAACAGCAGCA  
GTGTAACAAATGCTCCATACTCAAATAACCGGATAAACATCTCAACGTGCAACCGGGCAGAAATAAGTCAATCAAC  
CGTCCATTTGAG

>Sequ05875SNP2

GTGACGTAGCAGATCGCGCACGGTGTATCTATCGGACAGAGTTCAGATAAGACTCCCCGGTTGACCTTGCTTTTCGAGA  
GCTGACCAGAAAACAACACAGTCCAGGGACAACATGACAACCTCGAGTTTATCTGCTATGCCGAGCTACCAATGCC  
TCCGCTGCCACATTAACAGCTCGGGATTTAGGTTATCTAAAGAGCATTGGTTCGTAGCGGTGCCAGTCGCAGTGGT  
TGCAGCTGTTGGAGGCTTCTTAGTCAGCCATTACCTGAGCAGGCGGAGCTGTAAAAGGGCCCTGGTGAACACGTCAT

CAGCAAAGACAGCCCCAAAGTGGTCCACAGCTTTGACATGGAGGACATCGGTACCAAGGCTGTGTACTGCCGCTGCTG  
GAAGTCCAAGAAGTTCCTTACTGTGACGGAGCCCCACACCAAACACAACGAGGAGACCCGGGGACAACGTTGGACCCCT  
CATCATCAAGAAGAAGGATGCTTAAGCCAACCAATCACAGATCTCCACCCCTCTCTTGACTTCTCATGCAGCCGCCCC  
AGTTTATACAATTGTTTACCATCATATTAACAGTATCGCACTAATGGTTGTGGTACAACACTGCTACAATCAAACAG  
TGGATATTCTTTGTAGCCCAGAATAGAGACCCAGAAAGTACTGAAAATATGCAAAATTTTGATTCTTGACCTTCCACA  
CTGCATTAGACAACATGACTTTGAAATCAAAGGTCATTTGAGGAGAGATAAGGAGAGACTTTGACAACCAGCACAGT  
AAGACATGGAGGTATGTGCTGTGCAGTTGAATTTTGACATATTTAACCTGAGCATTGTGATCAATATTCTCATCAC  
ACCTGAAATATTTCACTGTGTGGGCATTGTGTGCTCATGTCTGGTGTCCCTTCCCTTCTTGACTCCGCCAGGTGTGGA  
GCAGGTGGTTGAAACATGTAATGAACTGGCAGCTCTTTGCCTCAGTCAGTATTTCAATTGAAATTCAGCGCAGGCCTTA  
TATTCAAATCTAGAGACCAGAGTCTGAACACACACAACCCACATGAATGTTACATGCTTTGATTTTTGCACAAAGAGC  
TGCTTAGTCAGAGGAAAACAGAAGTTTGTGTTTGTCTTAAATTAATAATAATCTCCGATCTTGAGAGCTGTTGAAACAC  
TATCTGCTGTTTGTAACTACTTACTGTCTGCTTTCTGAGGAACTGTTGTATTTAATCTGTAAAGTGTTCAGGGTGA  
AAACTCTGCTTGTAAAGGATATATTTTGCCTTGTGCATCAGATTTATTTTCTACTGGCTGCGGTGTGTCTGACTTGATG  
AATCATTGTTCTGTATACTGTGAATAAAACTTGTGAGTGAATAAAAAAAAAAAAAAAAAAACCAGAACCTCCCTAATAG  
T

>Sequ05897EST2

TGATGAGTGGGAAACTCCAGAGAAGCTAGCCTTTCAAAGATTTTGGTAATATGCGTCACTGGATTGAGGACTCAGACT  
GTCGCGACCAGTACAGTGTGATCTACGAAGCTGGAGAGAGGACCGCCATTTTTTCCAATGATGCTAAGGAACCAATCA  
CAGTCAAGAGAGAGACGCTGGACAGAGACGTACGTGCGCTGGTCTCCCAAAGGCACCTATCTGGCCACATTCACC  
AACGTGGCATTGCATTTGTTGGGGCGGCGAGAAGTTCAAACAGATTCAGAGGTTCAAGCCATCAGGGCGTGTCCCTCATCG  
ACTTCTCACCATGTGAGAGGTATGTGGTGACCTTCAGTCCACTGATGGACACCAAGGAAGACCCGACAGGATCAATCA  
TCTGGGACATTTGACCCGACAGAAGAAGAGAGGCTTCCACTGCGAGAGCTCTGCACACTGGCCCATATTTAAATGGA  
GCCATGATGGAAGTTCTTTGCCAGGATGACCCCTGATACGCTGAGCATCTATGAAACTCCATCTATGGGCTTGCTCG  
ACAAGAAGAGTCTCAAGATTACTGGGATCAAGGACTTCTCATAGTCTCCTGGTGACAACATCATAGCGTCTGGGTAC  
CTGAGGACAAAGACATCCCAGCCAGAGTACTGATGCAGTTGCCTTCCCGTCAGGAGATCAGGGTCCGCAACCTCT  
TCAATGTTGTCGACTGCAAACCTGCACTGGCAGAGGAATGGGGATTACCTGTGTGTGAAAGTGGACAGGACTCCTAAAG  
GAACACAGGGCGTGGTTACCAACTTTGAAATCTTCCGCATGAGAGAGAAGCAGGTTCCCTGTGATGTGGTGGAGATGA  
AGGAAAGCATCATAGCTTTTGCATGGGAGCCCAACGGCAGCAAGTTTGTGTTCTCCACGGAGAGTCTCCAGAATCA  
ACGCCCTCTTCTATCATGTCAAAAACAACGGCAAGATTGAACTCATAAAGATGTTTGACAAGCAGCAGGCCAACAGCA  
TCTTCTGGAGCCCCAGGGACAGTTCATGGTCTGCTGGCTGGACTCAGGAGTATGAACGGAGCCCTTGCCCTTTGTGGAC  
ACGTGACTGCACCATGATGTACATAGCAGAGCACTACATGGCCTCTGACGTGGAGTGGGACCCAACCGGTGCTAC  
GTCGTCACTCCGTCTCCTGGTGGAGCCACAAGTGGACAATGCGTACTGGCTGTGGACGTTCCAGGGCCGTCTTCTT  
CAGAAGAACAACAAGGACCGCTTCTGCCAGCTGTGTGGAGACCCAGACCACCCTGCTGCTGACATCAGACCCAGATC  
AAGTTGATCAAGAAGGATCTCAAGAAATACTCAAAGATCTTTGAGCAGAAGGATCGTCTGAGCCAGTCAAGGCTTCG  
AAGGAGCTGGTGGACAAGCGCCGGTCCATGATGGAGGACTACCGTCTGCTACAGGGAGACAGCGCTGCAGACCTACCAG  
GAACAGAAGAGCATCCGCTCGAGCTCAGAGGAGGAGTGGACACCGATGAGCTGGACAGCAATGTGGACGACTGGGAG  
GAGGAGCCATTGAGTTTTTTATCAACGAAGAAATCATTTCCCTTGGAGATCTGTAGTCCCCTACGCAGTCCATCCGT  
TTTTGTGTGGAAGGAGGAGAGGAGTGTGTCTTATTGATTGGAGAAGGACGACGACCAGCTGTGAATCTTGAGGTTT  
ATCTCAAGCCTCAACTTCAACATTAGCGACACCATGAAAGCAGCCTTTGCGGATCTGCTGACATCAGAGGACGA  
GAGAGGATACTTTGTATTGAATATTTTCTCTTTGTCTCTCACCATCATCCGCCCATTTTTTTTTCTCTGTGGAACCTG  
ATATTTAGTAATACTGCCTCCATTTTTCTATTCACCAATTGGAGTCTGATCAGTCAACCGCAGCCCCGTCTCTTGAC  
CTTGTCTTCTCTCTGAGGTTGATTTCTGAACTAGCTTACCATGCTAGTGTGTATCACAGGGCAGCACAGAGTGCC  
ATACCAGTGGGGGGTGGAGGTGTTGTGACTAAACAAGTAGCCTTGTAAAGAAATGCGTTGATGTGGCGCTATAGTGGC  
TTGTATCTCTCTCTCAGACTAGGCTTTTACACAGGGAGGGTGTGTCAGTGGGAACTTTAAATAAACATTCA  
AACTCAGTAATACCGAG

>Sequ05938EST2

TTAGCAGCCTGTCACTCACCTTCCATGGACAAGAGCTGCTAGCAGACACCAGCCTGGAGCTCAACTCAGGCAGACGCT  
ATGGCCTCATCGGACTTAATGGCACNGGAAAAATCCATGCTGCTGTGTCAGCCATCGGGCATCGTGAGATTCCCATTCCAG  
AGCATAGATATTTACCCTTGACCCGGGAGATGGCCCCAGCGACAAGACAGCTCTGATGTGCGTTATGGAGTTG  
ATGAACAGAGGATATGCTGGAGAAGGAGGCAGAGACTTGCCTATGAGGACTCTGAGTGTGAGAAGCTGATGGAAC  
TGTATGAGCGTCTTGGAGGCTGGATGCAGACAAGGCAGAGATGCGAGCCTCACGGATCCTCCACGGTTTTGGGTTTCA  
GCACCGCTATGCAGCAGAAGAACTGAAGGACTTCAGTGGAGGATGGAGGATGCGTGTGCTCTGGCCAGAGCCCTGT  
TCATCAAGCCCTTATGCTGTTGCTGGATGAGCCCACTAACCCTTGGACCTGGATGCTTGTGTGTGGTTGGAAGAGG  
AGCTCAAGTCTTCAAGCGAATCCTTGTGCTCATCTCACACTCTCAAGACTTCTGAAACGGTGTGTGCACCAACATCA  
TCCACCTACATCAGAGAAAATGAAATACTACACGGGTAACATGACCAGTATGTGAAGACCAGGGAGGAGCTGGAAG  
AGAACCAGATGAAGCGCTTCAACTGGGAACAGGACCAAGATAGCACACATGAAAAATTACATAGCCAGGTTTGGTCAAG  
GCTCTGCCAAACTGGCAGCAGGACAGAGCAAAGAGAAGACACTGCAGAAGATGGTGGCATCAGGCTTGACTGAAC  
GAGTTGTGAATGACAAGACTCTGTCAATTTTTATTTTCTCCCTGTGGGAAGATTCCTCCTCCTGTTATCATGGTTTCA  
ATGTGAGCTTCAAGTACAGTGACAACACACCAATATATACAAAGACCTGGAGTTTGGTATTGACTGGATACACGAG  
TGGCTCTGGTGGGACCAATGGAGCGGGGAAGTCCACACTGCTGAAGCTGCTCATGGGAGAGCTCTGCCACCAGC  
GCATGATCCGCAACATTTCTCACGTCAGATTTGGCAGATATCATCAGCATCTGACAGAGCAGCTGGAGCTGGACCTGT  
CTCCTCTGGAGTACATGATGAAGTGTCTTCCCTGAGATCAAAGAAAAGGAGGAGATGAGGAAGATCATTGGTCTGACG  
GCCTGACAGGAAAACAGCAGGTGAGTCCAATCAGGAACCTGTGAGATGGTCAAGAGTCCCGGTGTGTTTTGCTGGC  
TGGCCTGGCAGAACCCTCATATGTTGTTTCTTGGATGAGCCCAACATCACCTGGATATCGAGACCATTGATGCATTAG  
CAGAAGCAGTCAACGAGTTTACGGCGGCATGATGCTAGTTAGCCACGACTTCAGGCTAATTCACAGGTTGGCTCAGG  
AGATCTGGGTGTGTGAGAGTCAAACCATCACAAAGTGAATAGGGACATCCTAGCGTATAAGGAGCACTTGAATCAA  
AGATCGAAAAGCAGGCGCATGACATCTAAAGCATCGTCACACTCTGAGCCACTCTTATCTTGATCATGTATTTGA  
CCTGCAAGCACCTGAAGGGAAGATCAGGGTTTTGCATTTGAGGAAATGTCCCAACAAGAACTGAAACAATCTCTTATGC

ATCTTATTGGACACGTCTCATGTACATGTTGTACTGTATTTCCATCTTGGTTTGACAGTGCTACACTGTACTGAACCT  
GACCCAACCCCTCCTCTCCCTTCACCTCAGGCTGCACTCTGATTGGCTGATTCACCTGAAGCATCTCAGTGCATTTTG  
GAATGCATTTCCATTTGTGCTGTCTTCATAGAAAACCATTTATTTTTCCAAACGTTCTGTTTTATCCCAACATGTATGC  
AGCAGCTTTTAGTTCATATTTTATGATATTTAAAAGTTGACTTTTTTTGTCTGTGTAAAAGCAGTTCTGCCTTATTTA  
ACAATGTAATGCAATAAAGGTTTGTCTGAATAAACAGAACAATAAAAAA

>Sequ05946SNP2

AATGCCAAAATCAAAGGAAGTGTCTTCCACATCTGGAAGTGACTCCGACAGTGAAGTGGAGACCAAGGCCAAAGAG  
AAAGAAGTCAAGTGCACCAGAGAAAAGCAGCCAAGAAAACCAAAGAGTGGAGAGAGCTCCAAGCCAGGTGGCTCATCCAA  
GGGCAGCAGTAATGCTGATGACAACATGTTCCAGATTGGAAAGATGAGATATGTCAGCGTCAGGGACTTCAAAGGTAA  
AGTCCTGATTGACATCAGAGAGTACTGGATGAACCAGGATGGGGAGATGAAGCCGGGGAAGAAAAGGTATCTCCCTGAA  
TCCTGAACAGTGGAAACCACTGAAGGACCAGATTTTCAGAAATCGATGATGCCATTAAGAGAATATAAGCATTCTCTGTC  
AGTATTATCTGTCGGCTCACCCGTTTTGTAAAAGCCTGGGATTGTTTTCTACTGTTTAATTTGTAGTTGTATAGCT  
CCAGTGTCACTGCATACTTCTGTGTTTTGTGTGAAATTTGTGTTTGAGCTGTGTAGTGAAGGTGTGTGTGGATGAGT  
AGGTGATCGATCATCACAGCTGGTGGGAAGGGTTTCGTCATACAGTGTATGTTTTGTATCAAATAATAAAAAATGAGGC  
ACTAGTTTTAATATGTTGTTTCAGTTAATGTTGAAGTTTGTGTTCAAAGTTTGACCCCTCATGTAAATAGAAATGATAAG  
AGTGCTTCAGCTGACCTTTGCTTTATATAGTACCCAATATTCATGTCTGAGAGACAAGCCAGACTGTTGCACTGTAC  
TTTTAGGTAAGTAGATTTCAGATTTGGAAAATAAAGATCCCATTTAACAGACTGGTATATTAACGATTGTAATGATT  
GAAAAGCACCTCTGTCAGTTGCAAAGAATGTGAGTTGGGGACCAGTGAATGAGGCTTGTGGTACTTTAGTGAGTAAAT  
ACAAAAGCTGTAATTTTCTCCAAACTTAGTGGATGTTTTGTGAGAAGATAAAAGTAGATCAGGGGACACCATAAGTCG  
TGTATGGGTCATAACAGTACTACAATTTTTAACTGAATGATGGACATTTACTTTTCATTAATGTCAATTTCCCTCAA  
ATTATTCACCTTAACTGAATTGACTGACATTAATTGGAAATACCTGAAACAATTTCTGCAGTTTATCAGATTTATAAT  
AGGATTATAATTTATATAGCTATGAGAAATGTGATGCCAGCAGTTAAGTGAATGACAGTTTACCTTGTAAAGTCCT  
TTAGTGAGCCTACTACATGTTATGATTATTGTAAGAAAGTATTATGACTGTTTTATGAGTGTCTGTAGTATAATTACTC  
AATGCTATAAGCCAATTATAATGTATGATGAATGTTTGTAAAACATTAAGACATGGGCTTCATGGAGTGTTAGAACA  
ACAATGTTCAAACCTGCTGCCTTGACAGTCCATATCTTAAACCCAAAAAAAAAAAAAAAAAACNGAAGACTCGACCGA  
AGGCACCAGGAGGGTA

>Sequ05974SNP2

CCTGTTGTGATTTTTTTATTTATTTAAAGACACTGAAAAGAAAAATACCTTTACCCATTTTGTGTTCCCTACAGTAATG  
TACAGTGTGTTCCAGTATGATTGGTAGATACCAATATACAAAAGAAAATATGCATTGCATTGATATGCATCTTGTCC  
AGATATAGATCACATTTTAATACCAGGTGTAACACAGGGTGAGAGTTAACCATAAGCAGATAAATTGATGTTATGTATTA  
AAGCAACAGCAAAATCTTTGAAGGTGTTAATGACATAGAACAAACAGTAACAAGAAAACACTTTTTATTATTAGG  
AGGCAGTGTATATGTTTACTGTGGGAGATCTATCATGCTACAAAGACTATGGCTCTGATAGTGAGGATGGACATTAAT  
TTACATTTTTTCATGATGAGACATCACTTCATTCCAGTTGGGAAACCTCGTGGAAATATGCACCCAGCATCTTGATTCC  
CTGAATATAGTTGGATCTGTTGAATTTCTCATTCTGGGAGTGAGCTCCATCATCAGAGGATCCAACCTGGAAGCAGCAT  
GACATTACGCCCTGTGGCTTCCTGGAAAGTCAGGGTGACGGGAATGCTTCCACCCTCACGTGTCAGGTCGGGCTCGAC  
ACCAAAGACTGTTTTTCATGGCCTTCCGACCAGCCATGTAGTGTGGGTGGTTGAAGTCAGAGACCCAGGCCCTGGCTCC  
GTGGCCCATGTACACTTTTCAGTTTGTGGGGTTTCCAGCTCAGCAAAATTTCTTCTGCAGATGGCCGATAACCTGCTT  
CTCCACATCTTTGGGTTCCATGTCCAGGACAGGGCGGATGGAGAACCTTGGCCGATGACCTTGCAGGAGATAACAGTCTT  
GGCTCCTGCTTCAGCGAAAAGCCCCCTCAATGCCATGAAGAGAAAGAGATGGGTACCTCCAGCGGTGCATTAGGATTTG  
CTCCTTGGTGTATGCAGCAGATGTTTAACTCCAACATCTTTCAGTACTCATCAAGTCAAACCTCAATTTTCTCATA  
CAGCTTCTTCTCCTCTTCTGTGTCAGAGGGGCCACGTCGTCGTACAACCCAGGGACCAAAATCTTCCCCTTCTGTCTAC  
CAGGGAGCCCAATAAGTGCAATAAGGTGAGTCAATGGCCCTCATGAACAGAGCCACCAAAACACCCCTGAGTGTAGGTCCTT  
CTCACAGCCCTCCACCTCAATGAAGAAGTAGCAGATTTCTCTCAGCCGTTAGGTGATGCAGGGTTTGGTCTTGCCACG  
CCAGTAGTTGTGTCAGAGATGCAGACATAGTCCAGCTTTTTTAAGAAGGTGCTTTTTTCGAGAAACNCCAGTTTCATCCAGG  
CCCTCAGATCCAGACTCCTCCATCCCCTCGAAGCAGAACTTGATGTTGATGGGAAGCTCCTGCTGGATCTTCTGGTAG  
GCCTCAATGCAGTTAAACCAGGCCAACACTGGACCCTTGTGTCAGTTGAACCTCTTCCATAGAGCTTACCATCTTTC  
TCCACCAGAGTGAAGGCTCTGTATCCCAGCCGTCATCAATATTGGCTGGCTGGACATCAAGGTGGCCGTAGATGCAC  
ACAGTCTTCTTACCCGGATCTGACCCAGACGCCCCAGGACGATAGGAGGCGAGGGGATCTCCTCTCCGGAGGGAAGC  
GTCTGGTTGCCAATGTCCACCATCTACTGTGCCCCCAGCTTCTCAATGTCTTGGCTGCCATCTCCATCACTCTTC  
TTGATCTCCCACGCTTCTCTGGCCAAAGCAGAAACGCTTGGACTCCCACCATTTCAGCAGACGCTCCACATACAGA  
TCCTGGTGTTCGTCCACATACTTGAAGAAGCGCTGTGAGATGAGCCATCTTTGCCAGTGACAGGAGGAGCTGACACACG  
GCTCCTGTGTTTTGTTACCGACGGACAGCGCTGTTTTCTTAAACTTTGACGCAATCTTTATTGAAGCCGTTATTGAGCC  
GACAACCTACCTAGCCAGGCACACACAGTG

>Sequ05983SNP2

CTATTTTTAGCGGGGATTAATCCACATTTGCTGCTGTAGTGGGTATTTTGTAGTAGCAGGCCGATGTGTGTGGGAGTG  
AGTGAATAAATAAATGTTGCACAGTGTGTGTTTCATGTAATGAAGGCTGTCACCAGCGCAACAGTGTGGCTCAGTGATG  
TGTTTTTAATGGTGTGTTGAAACAATGGAGCTCTATGGCTCAGAGGAGTGCAGATGCATCAGACTGTCACACACACAAT  
AGGAGATTATCTGTGTTGGTTTTGGTCTGCGGATGAGATTTAATGACTATAAGAGGAGGTGTGTCTGAAAGTCGTGGT  
GTGCTTTGCTCGTTTTATCTCCAGCAGCCGTACAGAGTTTCATTTGTGTTGCTTCTACTTGTCTGAATCTGTCTGTGAA  
GTCATTTCAACAGTCTGTGGAGTTTAAACAAGGAATCATTGAAAAACAACATGGTTGCGTTTTGCTTGTGTTTTATTATCA  
ACTACTTTTTTATGTTTATGATTAAGAAATGAAATACAGAGTAAAGACCATATACTGGAAGCTTGTGTTTATTTATTTCA  
TTGTGACTGTAACCAAAACATTTACGCACATAATCACACCAAAACAACCCACAGCAAAAAAGCTCATTAACACAAAACA  
TATTTACATATAAATAAATAAATAAATAAATAAATAAATAAATAAATAAATAAATAAATAAATAAATAAATAAATAAATAA  
TTTCAGACTGTTTCGTTTTTCATTAATTGACTAATCTGCATATTAATTTTTTCAGTTACTTCACTAATCATTAAGTCTTTAAA  
ATTTGCTGCTTTATAGAGAGGGAAATACTTTTACCCAATTACATTTATCTGAAAAGCTGTGATTACTTTACAGATTAAC  
ATTTTATTTGCACTGAATGAGAAGATTTTGTAAATTAGGGACTTTAGTTGTAGTAGCATATGTTACATTATACTGCCA  
CATTAGTGTAGTCTTTTACATGACATATACTCAGTTGTAGAAGAAGTACTCACATCATTATATAAGACAATAACAC

TACACTGGATTAGTTTTAGCTCGGTGTAGCTAATATATTGAGTGTACTAAATATGCGCCTCGTGGATTGATCCTAA  
AATCATTTTTCCTAATCAAAATAAACTTTTTGGTTTTCTTAAACCTATAAAAAATTATGACATTTCC TCTACAGTTTTCTTT  
GTTTTGTCTGATCAATAGTCCAAAACCTAGCTCAATCATTATTTGATTTCTATTTAATTGGTTGAACTCCAATGTTTG  
CTCAATGTGTATTGAACAAAAAGGGTTTTTTTACAGTACACATCAGAACATCTAAGATTGGAATTAACAAACCGAC  
ACAAAGCAATATTTCTATTTTTCAGCTACTGTCCAAAAC

>Sequ06020EST2

TGGTCTCCCGTACTGCTGAAGCGGTGCTGGCCGATGTGTCAAAATGGTCAGAGCTAACAACTAGAGTAGCCTGCTG  
GAGATGGGCTTTGACAGAAACAGAGCAGAGAAGGCGGTGGCCAACACGGGGAAACCAGGGGATAGAACAAGCCATGGAC  
TGGTTAATGGAACATGAGAACGACCTGACATTTGATGAGCCCTATGTGCCACCTGTGGGAAACGTCCTGGGAGGGGAA  
GCAGACAGCCAGTCCAACGCAGAACAGCAACCCTAGCCGACACCGCTGAAGTGGGGATATCGGCTACAACGAGACTGA  
TGAGAGTTCAAAAGCACCCAATGACAGAGGAGGAGAAACGTGAGCAAGTTAAGAGGCTAGAGGAACTGATGCGGGTGA  
AGCAGGCGGAGAGAGAGAGAGCGGAGAGCGGGCAGAAAGAGGTGGAGAGAGAGAGGTTTCGGAGGAGGCAGGGCCAAGAGT  
TGCAGCAGATCCGCCAAAAACTGCAGGATGATGATATGAAGAAGCTTGCTGATCAGCGCAGGAAAGAGAAAATG GAGG  
ACAAAATGGCAAGACAAAAGGGTCAAAGAGAAGATAGCGCGAGACAGAGAGAAAAGAGCGCAAAAGTTTTGGAGGCGGAG  
GACCCCGAGCACAGCTGCATCATTCCAACCTGCCAGCCAGCCCTCATCACCCACCAGTCAGGGCCCTCCACCCA  
CTAAGAAGGAGTATGATGAGTCCAGGATACAGGTACGTCTGCTGGACGGCTCCACCATCACGACGGTCTTCAAGGCC  
AGGAGCCGCTGGCGGCAGTGCCTGTCTACGTGCAAATGAACGGCAACACACCAGAGGGTCAAGACTTCATGCTGCTGT  
CGCCCTACCCGCGACAGCTTACACCGAACTGGACATGGAGAAGCCCTGAAAGAGCTGGGTTTTGGTGCCTTCAGCTG  
TGCTGGTTGTTGCCAAAAAGTGAAGATCAGGAGGATCTGCTCTGTGAGCCTACCTCACCACTTCCACTACATCACACC  
AGAGACACCTGAAACGGATGGATCCAGGAACAGAGCCGCCACCTTTTTTAGTATCACTCAATAAGCCAGCTAACTGAAC  
TAAAGCAGAGATGGAGCTGGAGGCTGTGTTCCAGACAATGTGTTATAGTTCTTAAAAATGAAGATATGGAAAAGTTATAA  
GGAAAAATGGTTTTGTTTTCTTTCTAAACTAACTGAATGCAGCTCCTTGTCTTTCTGGGCTGATTTCACTGGCTGTAGA  
TTGGATTGACAGTGACCTTTACCTATCAAGAACAAAGTGATGATAGCTGGCTTCTGACTGATACTGCCTCAAGAAGCA  
CCGCTCATGGTTTCAGCAACACATTTACAAAAATGATACAGAACAAATTTGTTTCAGTTTTAACCAGATCCTTATATAG  
CAAAGCACACACAAGACTTACTTGGATTGGTTCTGAAAGGGCCTTAAATTTAATCCCCACTATCTTCTGATTTTTGTG  
ACATCTACTTTGCCAGTTTTTTATAAGTTAAATATATTGACAGTTATGTCTACATAATCACCAAGAATCTACTTA  
CAATAAAGCTGACTTGGAGAATTGTGATGGTGGACTGGATTTTCTAAAAATCACTTGTGTAACCCCTCTGATATT  
CTGTATTTTCTTTTGTCAAACACTTTTTAGTTATTTTAAATATTAGGATTGATTTTCATTTTATTATGACCATGGAAG  
CTGGAATAGGCCAAAAGTATCACTGCCACTGGATTTTAAAGCACCTAGTGAGCTGGAACCTGTGTTACATATAAAATA  
AGATGAAAATGTTAAACATGAAAAAAGCAACGGCTAGTAAAATAATAAAAAATCATTAGCTGGCTAGAAAATTAACATAA  
AAAAAAAAAAAAACCAGCTACC

>Sequ06023SNP2

GGGGGTCATATCAGGTTCTGGATCTTGCTTTATACTGTGGGATTGTGTCTGTGTTTGTATGCATAGCTCACACTTTAAC  
ATCCTCTCTGCTCATGTTTCATCTTTGATTTTTATTGGGACCACATTTGTCAAATCAAAACCTCACCCGCTCCATTACACA  
GGTCACTTATAGTTCCAATATCCTGAACATAGCACCTGATTCATGGTGGTCTGCTCACACCTTGATTGGCTGGGTAT  
AAAACACTGGAGTGATCCAAGATCAGCATTTTTTTATAACTCTGTTTTCCATTTGCTTTGAGATCATGTGTTGGCTAAG  
AGCTTTGTTTAACTGTTCTAGAGTCATCTCTCTGCTGCTGAACACACTATATGTAACATCAATGAGCCGTTAAA  
GGGGTAGTGACAAATAATTTTCTTAAACATGTACATAGACCCTCCCTGACCTTTCTAATCTGCTCCTTTTGTG  
TTTATCTCCACATGACGAGGACTTAAAAACAAACAGGTAGAGTGTGAGGCAGAGAACAGTTTCTGTACACTCTGAGA  
TGGGCAAATGCTTTTTCAGCGTCTGTTAACTGTTTCTTTGGCGTTGTCCCAGATTGACTCTCAGGTAATGTGAGAATCT  
ACCTCTGTAGGTGAGACTAACTGTGAAAGAAGAGGCACGAGTCACCATCGCTTCAGAGAGCTTTATTTTTACTAAAAG  
AAGCCACACCCCTGATTGTACCTGTCTTTCTTTTCAATAAATATTTTGTAGAATTTGCAGTTTC TATTCATATGG  
ATTTCTTACTGGGCTGTTGTGAGTGAAGTGGACAGGAGGTGCTGATGTCATGTCAGCATTCTCAATTTTATATAA  
ACATATTTTTGAAAAGTTACAAAAGTTTTATTGTAATTTTGCATTACGTAACAGGAAGGAAAAGAGGTGTTCCCT  
CAAGTGCATTAATTTAGTCCACACTTTCACTCCAGCCGAATACTGAAGACTTAATGAACAGGAGGAAAATACAACAG  
GGAATGTTTCTTCAGAGGACAGCAGTGATATGTCGCTAAATGTGCAATCAGAACAAAACGACAGGTGTGAAAGAAAG  
CTTATGGACATGACCAGCATGGTTAGATTCACTGTACAGTTTCAGAGGGATGGAGGTGAGGTGCTTCTGTGCTCCT  
CTCAGTGGTTTTCTGGTGAAGTCAAAATGGTAAAATACCACCTTTATTTTCTCACATGATCCCTTTGAAATGAAC  
AGATGAACCTGTTCTAGTAGCTTTGTGTACTTTTAAAGTTTTCTGCTCCTTTGAAATTTCTCAAACACTGGAGAAACG  
ACCTGAGCACATCTCAAATCTTGAATGAGTGCATAGCTGCTGTTGGTACCTGGGCCACAGGGATGCTGAGCAAGAT  
AAGACTGAGTCCAACCTGTCTGTTAGCAAGAGTGGAGTCCATGCTGTCTCTGACCCTCCACACTGTTTCATCCATGTAGA  
GGCAAATCTTTCATTTTGCCTCAGGTTAAGCCAGAAAGGGAGGTGAAGTCTGAAGCTCAGGGGTGGAGGAGGGGT  
TGAACCTGGACAGGGTTTCATGCAGAGCTGGGTTAAGATCCCTGCGCCTCCAGCTCTGATGCGGGGGTGTGTCTGGC  
TCTTCGTCAATTTAGATGTTTTCCGCCATCTGCCAGACTTGCATGATGTTGTCTC

>Sequ06038SNP2

CCGCACTACTACATTTCTAATAATTTGATAATTTGTACATTTGATAAAACATTTCAATCATGTTAATGTTTCTCCTCTTT  
GCAACCTGTGCTCCTGGGCTGGCCCAAATATCTGTTTTTTCAGGTTCTGTGGGTTTCATTAGTATTAATGCGGTAACACA  
GTCAGCTCAGGTCAACCATCTGCTTTTCAGTGTGGCTAGTTTTACAGAAATCACTGCCAGTGATCAGTGAGTTCTTCAGC  
TGTTTTCTGCATCTTTGGGACAGCACCTTTTGGAGTTGCTACATTCGATGGCTGGCTGGATGTCTCAGAATGGTAGGA  
AGTCTAGTTAAAGCGTAGTTAATTACAAATTTGGCCTGTGTTTGAATTAACATCTCCCTGAAAAAGCTAAACCAATA  
GCTGCTTTGAGAAATAGTCTTGAGAATGTGAAAATGATTCAGAAATAATTTCCCTCTTGATAATAGTTAGTATACAAA  
GTCAGCCCTAGGAACAAATGTTCTGTTTATAGCTATATTCACCTCTTATGTCTTATGGGTATATTTATTAATTTTCA  
AGGTTCTCTGCAAAGCTAACAAAGTTCGTCATTTTCATAGGTTTCTTTTCATAGGTTTCTTTTCATACTTACAACAGGTTTA  
TGGAACATAATGCAAAAATAAAATGGCACATCTGAGTATGTGTCATTTGAGACTCTCACAAAGTGATAAACTTCATT  
AGAAGGTTTAAAGATGTGGTGGAAAGGGATGTTGTGAAGCACTGTTTTAAAAAATATACAGTGTGTTAGAAGACAACG  
GTGTGAAACGACTCATGAGAACTACTGGACTTCTTTAAATGTAATGTGTGGAATAATGTTATGCAGAAAACTCCAG  
CATAAATAAATAAAGTTGTTAAAGTTGGTT



GATCTGGGACGAAACCCTGTATAAGGCCTGGTCTAGCATAGTGTACCAGCTCATCCCGAACGTCCAGCAGCTGGAGAC  
AAACCTGAGAAATTTTGACAGATCATTGAGGCAGATGAAGTTCCTTCTGTTTGGAGAGGCCACCTTCCCTGGTATCTC  
TCACTATCAGTGCAAAGAGCAGCGCATGCTCACCGGTTTGGAGAAGATCAGTAACATTTAAGCAGTTCAAACCTCAG  
CTGTAGTAAACTTGCAGCCTCTTTCCAAAGCATGGAAGTGAGAACTCCAACCTTTCGCGGCCTTCACTTGCAGTCTTCC  
CTCCAACACATATGTCATGGTTCATCATGTGACACCCATCCATTTCCATCTGCAGCCACTCTCATCAATATCCGTAATGC  
TAGGAAACACTTTGAGAAGTTGGAGCGGGTGGATGGACCCAAGCACAGCCTGCACATGCGAATGCGCTAGCTGGCGCA  
TTTGTCCCAGTGGATACTCTCAGCCAATCAGTGCACAGACCACAGAAGGCATGTTGCGGCCTTCCACCTTGGCGATAC  
ATATGAGCAGCCCTGCACCGTTCCTCTATATTTTTCACATTTCAATCACAGTTATTACGAGAGAAATCATATTTTCTTTT  
GGTCTAATTTCTACAGTATCTTGAACAGTGCCTTTCTGTTGAAATATTTGTCCTAACTTGATGCATTAAGAAAAA  
ATTTATAGTTGTGCTTATTATGGAGGCGGCTACCTTTGCTGTGCACACTTTGTCATACATGGTAGATACATTCACCTCA  
TGCAATGCGTGAATCCCCGCAATCGGGGGATGTTATCCCCAAATTTGATTTTCAGATGCAGTTTGTAAAGCTGTTACTC  
TTTGACAGTACAAACAATATAGTTATATTTCAAAAAATATCATATGTGATGTGTTTTTCTGCTTTTATATTTTAAA  
GTCCTCACCACCTTGATCCACATTTACAAAAACATCATATTTATGGTGGTACATGTTATAAACAGATCTACATATTGGT  
ACATATTTACTTCCGTGACAAACTATCCTGCTTTGATAAGGTTTCATGTTATTTTCTCTATTCACTACAATGCCCGTGC  
ACATAAGACCCATTAACACTCTGCACCAAGTTGCTGTACACATGGCACATGGTGGCAAAAGTGTGTAGGGGGTTGG  
TTGGAGCTGCGTGGGAGGGGACATGATAAATGGGGTGCACCTGTTAAGCAAGCTGAATGGAAGTGAATGTCCCATGTTGG  
GCAGATGGAGCAGCATGTTCAATTTAGTGAGTTAACATGACAGCTGCATGTAGTGAAAAGTGAATGTCCCATGTTGG  
TACTGTATATAAGTATTACTCTGCAACATTAATATTTCAACTACATAAGC

>Sequ06106EST2

AGCTGATCTCTGCCAGAGAGAGGACGGAGAAAGATGTCGCTGACAAACTTGGGAAGGATGGAGGCTGTTTTATCCGTG  
GCGTTTTGCTTATGCTTGTGCTTCAACCGGTGTACATGGGGACAGCTTAAACAGTGTGCAGGCTCCAGAGTTTGTG  
TCCTTCCAGAAAGGAGACTGGCCTGTGTCGAGAGAAAGATCCCTGACCTGGTGGCTTTGACCATGGGCTTCTCTGTT  
CAGGAGGATCTGTCTGGCCAGGCTCCAGGCTGGTCCGTTATTCAGCGTCCCCGGGCTAACGTACTTGTGGTGGTG  
AGAGGAGTCGATAGCTTGGCCCTTCCCTCAGAGTGTGGCTTCCCTACCCGTTGGAGAATCCAGTACCCTTCCACTTGGAT  
AGTGTGTCAGAGACGGTGCACCTCTGTTTTGCTGAGGACACTCCTGTAGTGTGCAGCTGGCCCCCTAGTGAGGAGAG  
CTGTATATGCTGGCAAGGCCAATGCAGTGTGTTGAAGACCTCCAGTACCCTTGCAGCAGATCCGTGCCCGCTCC  
CAGGATGGCTCCGTGTGCTGGCCTCCCTGCCCCCTCAACTCCCTCAGCAGAAATGCAGAGGCTGATTTGCTCTTCTGTCT  
GAGGTCCAAGTGTGCATGATATCACAGCTCTTCTGCAGAGACACAGACATTTGGCAAAGGACCCTCCCTGACCTG  
TACTCCTTGGAGCTGTCTGGCCTGGAGGAGCTGAGCCGGCTCTACGGCCAAGACTCCCACAGTATCGTGATGCAACT  
GCCATTCCTCGCTCTGTCTTGCAGAAGTTTGGAGAGGATGTGTATGGTCTCTATGGCAACAGTGTGTGGTGGAGGTT  
GTGACGGTGAAGACTTTTGGAGGCTCCTTTGACCAGGAAGTCCCGTTGATCCTGCAATCCCCACAGATCAGTAACCCA  
GGCAGCCCATACAACCTGGCCTACAAGTACAACATCCATTATGCTGTGATCTTCAACATCGTGTGTGGCTAATGATT  
GCTCTGGCCCTCGCTGTGCTATTGCCATCGCTTACAACCTGTGGAACATGGACCCAGGATATGACAGCATCATCTCAGG  
ATGACCAATCAGAAGATCAGGATGGATTAAATCCATCAACACTCCAGCTGTGCTCTAAGATCCCTGTTGTGAATGTTA  
GTGTTTTGTGTGACGCTCTGTGTAGTGAAGAAGTGTGACAGCTTGTGGGAGAGAGCGTAACACTGAATCACCTTTT  
TGTTTACAGCACTGATAACGGACAAAAATAACAACATTACAGTAGTTGGCTTTTAAATTTGCCTACATAAAGCAATTA  
GATATCATCTCCACTGGTGTGTACACTGAACAAATTCAGACTTCCCTCCTTTCAAACACGCAGCTCACATCATTCCTT  
ATGACTCTTCACTATGTTTAAATTTCCATCCTGGTGATTGCAATTTGATTTTTTTATGTAAAAAATAAATAAATAA  
TTTTGTAATGTCATGAAAAGATGAGATTTGTCTGGTTTTCTGTGTGAAGTTGTGTGCTTGTCTTGGATATGTGAAC  
TTTTAAGTTAAATTAATCTATGTGTATATATTGAAAATAAGAATACAACCTGTATGAGAAACTGCTGTACTCTCATTGT  
GAAAAGATTTGTGCAGTGTATTATCCAGGTAGGTCCTGGTACCCCGCTTCTATCCAAATGATAACTACATATTGGAT  
TACGTAATACTTGTATCGTAATGTAGGTTGTTAGGATTGGATATGGATAAATGAAGCTCTGTAAATCGCAATAAAA TG  
CCTGACAATAAATTAATACATGGATCAAAAAAAAAAAAAAAAAAAAAAATAAATAAATAAATAAATAAATAAATAAATAA  
AAAAAAAAAAAAAAAAAAAAAATAAATAAATAAATAAATAAATAAATAAATAAATAAATAAATAAATAAATAAATAAATAA

>Sequ06109EST2

AGGGTTGCGATGTGCTGGCCAAGTCTCTGGAGAAAATGGGGTACAATGCGTGTACGCTGCACGGTGGCAAAGGCCAGG  
AGCAGAGAGAGTTTGCCTTTCCAATCTCAAAGCAGGGGCCAAAGATATTCTGGTGGCCACAGACGTTGCTGGTTCGAG  
GTATTGATATCCAGGACGTCTCGATGGTCATTAACACGACATGGCTAAGAACATTTGAAGACTACATCCATCGTATTG  
GTCGTACAGGTCGTGCTGGTAAGAGTGGTGTGGCCATGACTTTCTCACCAAAAGAGGACTCAGCTGTGTTCTATGACC  
TGAAGCAGGCCATCTCGAGAGCCCGGCTCCACCTGCCCTCCAGAGCTGGCCAAACCCAGACGCTCAGCACAACAA  
CGGGAACCATCTGAAAGAAAGAGACGCGAGGAGACCATCTTTGCTGATTTACTCCGACTGGTTCAGACTGTTTTG  
TCATGTTGCATCTTACACAATATCCGATTCTTTTTTCTGCAGTCGAGATATGGTCCACAAGTTAATTTCTGCCATG  
TCTTCAGTTGTTTTACACCTTCCCTCCGATTCTTTGTCGGTCTGTTTTTGTCTGTTGGCCAGTGTGCGAGTAGAAACA  
GACACATTAACCTGGTGCAGAGATAATCACAGCACTGGTTTTGAGGTGGCTCTAATGTGAACACTTCTTATCGATGTCT  
GTGAATTTGAATCTGTTACTCAGTTGGAAAATGTGTTAATGTAAGAGTCAGAGGTAGAAAATTTGTTAAACTTCTGTG  
AATAAGAGCGCAGGTCAGGATCACTTAGCAGGATGCTGATGAGCTGGACTGTAAGATGCTGCTCTTCAATAAATTA  
CAAGTGTGATAAATAACAGCCAAGATGCAAGTGTAGATGAGTAGAGAGTACTGTGTGTGCAATCTTATTAACCATTA  
CCATTTGAGTTTCTGACTGTTTAAAGAGACCAATGCCAGAAGTAATGGCTACTGTTTTCACTTACAGACACATCGACTG  
GCTAAATTTGAATTCGTTGTTTTTAAATATAAACATTTGTATGAAGTCAATACAGCAAATTTGAG

>Sequ06111SNP2

ACGCAATATTAAGAAAATCATGACTGTATGAGTATTTGCTCTTACCATTAAAAATAAATATGATGATGATCTTTAACTT  
CTGTTCCCTTCTTTTCACTGCCCATCATTGGAGCAGTATGCCATGAGGTCGTTTGCTGATGCTCTAGAGGTAATCCC  
AATGGCACTGGCTGAGAACAGTGGGCTTAAACCTATCCAGAACATGACAGAGGTCAGAGCCAGACAGGTCAGAGA

>Sequ06152EST2

TTTATCATATGTCAAGCTAGCTCCCAGTGATTAGCCACGTCATGTAAACTTAGCAGTGGAGGAATTTGTGATATCAACG







>Sequ06243EST2

GCCTGATCCTTGCACTTGAGCCTGTCTGCAGGCACAGGAGACTCTTTCTGGGTTATTGGTTTCATTGCACAACAGTTACA  
ACATTTAAATTAAGCGTAGTTACTGGGAACAAAAATAAGACCCGAAGATGACCTCCAAGAAAGTGATCGAGTTGTTT  
TACGTATGTGGTTTCTCCGTACTCCCTGGCTCGGCTTTGAGATCATGTGTGCTACAGGAACGTGTGGAACATAGAGC  
TCAAACGTGTCCTGCATTTCTGGGTGGCATCATGCAAGGATCAGGCAACAAACCTCCAGGTCTGGTTCCAAACAAAT  
TCATGTACATGACCAAGGATCTGAACCGCTTTGGCTCAGTATTTTTGATGTTCCCTGCAGCCTCCGTCTGATCCCTT  
CGAGGCCATGTTCAAAAAAGGCTCCTTGTCTGCAATGCGATTCTGGCAGCAGTACAAGAGAGGGAAAAAGGGCGGAGA  
CAAACAGGTGGAGCAGGTGTCCCGGGAGCTGTGGAGAAGGATCTGGAGTGAAGACAAAGACATCACAGAACCCGCATC  
ACTGCTGAGGCAGCGAAGAAAGCGGGCCTGTCTGACGGTGAGATTAAGAGAGGTGCTGCAGATGTCCACCTCAAAGAA  
GATCAAAGACAAGCTGAAAAAGCACAAACACAGGATGCACTTGATATTGGGGCGTTTGGCTTCCCTGGTGGTTTGT  
GTTGAGGAAAGCCAGAGATGTTTTTTGGATCTGACAGATTGAGCTGATGGCCACTGCATTGGAGAGAAGTGGCTGG  
GGCCTCATCTGGCAATCAGCTGCCAAGCTTTGAGACGGAAGCTGCCAATTATCTCAATTTAATGATGTCTTTTCATT  
TTCTCTAATACTAATACTCTAATTTGTATGCTGTGCCTCATTAACAAATATAACATGTAATAATCTAACATACCACT  
GAACTGTTTGATATGTGCCAATTAAAAAAGAGTG

>Sequ06257SNP2

GCTGGACGGTGGCCAGCTTCGATCGACGCGCTGTCTGAGATCGTGGACACGGTGCAGGGCAGGATCGAGATCTATCT  
GGACGGAGGCATCAGGACAGGAAGTGATGTATTGAAAGCCCTGGCCTTGGGAGCCAAGTGCCTTTTCATTGGCCGTCC  
AGCAGGGTGGGGCCTTGCAACAAGGGTGAGGAAGGAGTGAGGGAAAGTACTGCAAACTTAAATGACGAGTTCGGTCT  
ATCCATGGCTCTATCAGGTGACAGGAACGTGGCTGAAATCAACAGGAACCTGATCCAGTCTCCAACTCTAACTACT  
CCAGCAGAGGGCAGCACTGAGGAGGCCACTGAACAGGACTCACCTGACTCAAACCAAAGGTGTTGAACAAGAGC  
CTGCATCAGACTGCATCAAGTCAAAGTGAAGATGTTACCTCAGAACGCATGTCTTAATCACGTCAAAGGAAACATG  
ATACATGCAAGCAGCTTCCATGATTTGGAAATGACATCCACTGTGTATTCATGCCAGAGTGTATGGGTGCGAGATTGT  
CCTGGGGAAGCTGAGGGTCCGCAGCAGATTTAGCAAGTGA AAAATGAAAGTGT TATGCTTTTGGATTAGAGGGGGAT  
GGAGGCACTTAATGATCATGAAACCAACAAACCTCCTTTGGTTTTACTGTAACGAATGCAACAGATGATGACATACAC  
GACGGTTTGAATGCTGCCAGTGTCTGTGCTTTAATAAACACCTGCTGAGGGTGATGAAGACTTGTGTCTACCTTTCT  
GTATCTAGTTAAAAGCAGGTAGAAAACAGGATGTAGATGTAGCAGACGCTCTGTCTTTTGT TTTGTTTCATAAATTTAT  
ACATACATTTAATCCAGGGAAGAAAACATGACACAACATCTTTACAATACACGGGTTTAAGGGGATTATCTGAATGAAC  
AGGGCAGGAAAACCTAAGCTGGTCAAGTGTCTGAACTCGCTACAGCTGGAGGCCAGATCCCACCAGCTTCTAGAGAAC  
AAGAAGAACTATCAAAAAAAAAAAGGTCAAAAAGATGATTTTGTCTATTGTTTTTGCATTGGATTTTCAATCAGGAAA  
AGACATGAAAACTAATAAAAAACATGTAAGACTGAATGATAAACAGTTTTTGAAACAAAAACAAAAAACCAGAGA  
ACT

>Sequ06259EST2

AATATCAAAGAGGAGGAGACGTGAGCGAAGCGTTTTGTTCCGGGCAGCAGCGTGTTCAGTTCCTGCTGCAAAAATTA  
AAGCCAGTAACGTGTGTGTTGGCCTCGACATGGTGAAATATCCGCGGAGCTGATTGAGCAGGCTGCTCAGTATACC  
AACCTGTGAGAGACAGGGAGCTGGATTTACGAGGTTATAAAATCCCAGTGTTCGAAATCTTGGAGCTACACTGGAC  
CAGTTGACACTATAGATTTCTCTGATAATGAAGTCAGAAAACCTGGATGGCTTCCCTCTGCTCAAGAGACTGAAAACA  
CTTCTAATGAACAACAACAGGATTTGTGCGATAGGTGAGAATCTGGAGCAGTCTCTGCCAGGTGACAGAACTGGTC  
CTCACAACAACAACATTCAGGAGCTTGGTGACCTGGACCCACTGGCCTCGGTGAAGACATTTGAACCTTCTCAGCCTG  
TTAAGGAATCCAGTGACAAAACAAGAAGCATTACAGGCTCTATGTCATCAGCAAAATCCACAGATCCGTGTGCTTGAC  
TTCCAGAAGGTGAAGCTCAAGGAACGCCAGGAGGCGGAGAAAATGTTCAAAGGCAAACGAGGTGCTCAACTTGCAAAG  
GATATTGCCAGGCGAACAACAAACATTCACTCCTGGAGTGGCAGCAGCTTGAGAAGAAGAGGACGGGGCCGTCACAA  
GCAGACGTGGAAGCTGTCAAGAATGCCATCGCCAACGCTTTCATCAGTGCAGAGGTGGAGAGGTTGAAAGGGATGCTG  
CAGGCCGTCAGATCCAGGAGAGATCTCAGACAAGTCCAGTGGGATGGTGGAGGAGGAGGAAGAAGAGGAG  
GAAGATGCTGAACAGATGGCAGCACACATGGGTGGAGATGCTGGAGAGGAGATGAACGAGGGAGATCAAGAGGAGGAG  
GATGAAGATATGGAAGAAGAGCCACATGTTAATGGCTCCTGAGTACCCTGAAAGCATTTTCGTGTTGTTTTCCATGTTG  
TTAATTCCTGTGTGCATATAAAATACCAGGGCTGTTTTTTATTTGTAATTTGACAC

>Sequ06310EST2

GGGAAGGCTTGGATGTGATCATCATCATCCTTACTCTCGAGCGACAGGCCAATCCGTCCAGGAGGCTGCGGTG  
TGTTCCGGGACCAGGAAAGGGACCAAGCCAGGTTGGTGTGTGGTTCTGTCCGGAGCGGAGTACACATTGATCCCTGC  
TCCACCGACAACCTGACTCAGATCTGGGTACACTTCACTGTCACCATGGGCTCCTCCACCACATCTGCCGCTCTGTT  
GTGCTGCTTGGCGGGGCGCTGGCAGCCATCCAGACCCCCAGACAGTGTTCCTGGATAAGCAGCAAGCGAGCTTGGT  
GATCTCCGCTCAGAGGAGGGCCGTGGTGGCGAGTAACCCCTGCCCTCCAGCTGGAGCAGGCTTGCATGGAGAAGGTG  
TGCAGCTACGAGGAGGCCAGAAGTTCTTCCCTAGGACTCGTATCGTACGGATATCTTCTGGTCCGTCTACACTTGACG  
GAGACCAGTGTGCAAGGAGCCCTTGCAAGAATGGAGCCCTGTGTTTCAGACAGCGTGGGAGGTTATGACTGTGTCTGCA  
AGTCAGGTTTTCACAGGGTCCACTGTGAAAAAGACGAGACGCTGTGCACCCCTGGAAAAAGAACAGGGCTGCTCCAGT  
TCTGTAAACCAGGCTACACTTCTACCAGTGTCTTCTGCGCCCGTGGTTGGAAGCTCAGCCAGACGAACAGGGATAGGT  
GTGAGCCTGCAGTCAAGTTCCTGTGGTAAGGTGAGCAGTCTGAGTCCGTTGGGTTGACAGACAGTCAAGCAACACCC  
GCAGCAACTTTGAGGGACTAAGCTGTACTTCTACAGAGTGTCCCTGGCAGGCTCTACTGAAGGGCTCTGAGTGCAGT  
GATTCAGCAGCGAGTCACTTCTGAAGGAGAACCTGGTCTTGACTTCACTCAGCTCATTCGCAACAATAACAGGTCAATCC  
AGGTGGCGGTGGAAGCGCAGCAGCCGCTATGAAGATGGAGAGCAGACACTGTACATGAAAAATAATCCACTCCACC  
CGCGCTATGTGGAGGGTCTGCTGAAAATGACTTGGCCGTGGTTGAGCTCCGCGACCGCATCACCTTTAAGAGAGAAG  
TGTTTGCTGCCTGTCTGCCAGACAGAGACTTTGACAGAGAGCATCCTGATGACAGGAGAGTTACCCGCGAGTGGTCACTG  
GCTGGAAGACCCAAACAGGTATCAGCTTTTGAAGGCCCGCTCACCTTAACCACCTGGTGTACAACCAGCTGCCTCA  
GTGCTGAAGTCTCACCCCAACCTGATTACCAATAAAAATGGGCTGCACCTGCTCCCGACCAATGCCGACTGCACCAT  
GAGCTCCGGCAGCCCTTGTCTCACCTGTACAGGGAGGTGTTCTACCTCACTGGGGTGGTGGAGCCAGCCACAAGGGTC  
TGACTGTAGCAAAGGCTACATCTTCAAAAAGTGTACGCCACCTCCGGCTGGCTGCAGTCCATGGGCTCCCGTTA



CGGCTGCTCTTTGACGGTTTCCAGCAGCCGCTCCTCAACAAGCAGATGACGTACGTCTGCTGGACATCGCGGTGCAG  
GAGCTGTTTCCGAACTCAGCAAGGGAGTGAAGGAGGCGACCTTCATGTGAAGTCAACACTGAATCCACATCCTGGAC  
GATCGACGTGCAATACACAACGATTTCCAACACCTCTGGAACACCTCTACATTTCCAATGTTTATTAATGCACAAATA  
AAGATATATATTTATTGATGTCACCGC

>Sequ06448EST2

AACCTGACGACTGCACGGAGCACAAGGTCTTCATCAGCCTCAACTTCATTTTCTGCATCATTGTGTCCATCGTGGCCA  
TTCTTCCCAAAGTTCAGGAGGCTCAGCCCAGCTCGGGCCTGCTCCAGGCCCTCCCTCATCTCCCTCTACACCATGTACA  
TCACCTGGTCAGCCATGACCAACAACCCCAACCCGGCAGTGAACCCGAGTCTGTTGAGTGGTCCAGCGCACCAGTC  
CAACTCCACCACCGGGCCTGCTCCTGCCCTGGAACAGTCCAGTGGTGGGACGCGCAAGGCATCGTGGGATTGATGA  
TTTCTGTTTCTGCACTCTTTATGCCAGTATCCGCTCCTCCAACAACCCAGGTGAACAAGCTAATGCAGACTGAGGA  
GGCCAGGGTCTGACCGCTGACGAGGAGGCCGCCACAGGGGAGGACGGAGTCCGACGGGCTGTGGACAACGAAGAGGA  
GGCCGTACCTACAGTACTCCTTCTTCCACTTCAGCCTCTTACTGGCCTCCCTCTACATCATGATGACCCTCACCAA  
CTGGTACAAGCCCGAGAGCGACTACCAGGCCATGCAGACCACCATGCCGGCCGCTCTGGGTGAAGATCGGCTCCAGCTG  
GCTCGGCTTGGCCCTTACTGTGGACCCTGGTGGCTCCGCTGGTGTCTCCCGACAGAGACTTCAACTGAAAAACGGT  
AGAGTCTCTCCACATTGGTCGATAGCCTCTTGTGTTTTGCACCTTAAGGGAAGATAACTTTAGCTTCAAATCATCCAG  
CTTGAATGTTTTGATTTTACTCACAACCTCCACATTTAAAGTTGCAAACCTGAAATGTTAATGTGTCTTTTTGTTTTGACC  
CTAAGCCATTGCACAATTCACAGTTAACGTTAATGTGGGTTCTTGTCTCGATGAAATTTTCATTTTTGCAGAGGCTTA  
GTTGAGCTTTAATCACACACTGTTTTTCGCTCAGGTTATTTTTCTATTTTTCTCCACAGTTACAAATATGAGAATT  
GAGAGCACTACATGCCTTTATACAACAAGACCAATGAATCTTAAATTTATCTCTGTGGGAAATTCATGTTGTGACTCT  
GTTCACTACATTTACATTTGATTTG

>Sequ06460SNP2

ACATCCAGACAGGTTGGAGAGCGGACACTGACGGGGACCGTGATCGACAGCGGAGACGGAGTCAACACAGTTATCCCA  
GTGGCCGAAGGTACGTCATCGGTAGCTGCATTAAGCACATCCCCATCGCTGGTCGAGACATCACGTACTTCATCCAA  
CAGCTGCTGAGGGAGCGAGAGGTGGGGATACCTCCGGAACAGTCTCTAGAGACGGCTAAAGCTGTCAAGGAGCGGTTT  
AGTACGCTGCCCTGACCTTGTAAAGGAGTTTCAGCAAGTACGACACAGCGGCTCCAAGTGGATCAAACAGTACACA  
GGCGTGAACGCCATCAGCAAGAAGGAGTTACCATCGATGTTGGCTACGAACGCTTCTCGGGCCAGAGATCCTTTTT  
CATCCTGAGTTTGCCAACCCAGATTTACCCAGCCGATCTCGGAGGTGGTGGATGAGGTCATCCAGAACTGTCCCATC  
GACGTCCGGCGTCCGCTGTACAAGAACATTGTGCTCTCCGGAGGCTCCACCATGTTTCAAGGACTTTGGCAGACGCTC  
CAGAGGGACCTCAAGAGGACTGTGGACGCACGACTGAAAATAAGCGAAGAGCTGAGCGGCGGCAAGTTGAAGCCAAA  
CCCATTGACGTGCAAGTCACTCAACCATGCAGAGGTACGCCGTCTGGTTCGGAGGATCAATGCTGGCGTCTACT  
CCTGAGTTTTACCAAGTGTGCCACACTAAGAGAGACTCAGGAGAGACTCGGCCGAGCATCTGCCGCCACAACCCCGTA  
TTCGGAGTCAATGCTTTAGGCGCCGCGGGAGCACGTTCCGGCGGAGCCCTCGAGGAAAAACGAAAAAGGAAGCGGCAA  
GACCTCACATGCTGTGGAAGTCCCATGAGCCTTTGCACGGATGCTCCGACAGACCTGTTTCAATTCGGATAGAGCGACAG  
TGGACCAAAACAACTGCCAAAAGAGTGGCAATATCCTCGCAAATTAGAGGAAAAGAGGTGACTCAGCCCAAAGGATCCT  
CAAATAAAAAATGTTTACTGCAAGTAGGTTAATAATAGGTGATAAATCTTTAATTTCTGTGTGCCTCGTATATGTACTT  
ATTCTATCCTCACAGGGTTGTAATATGTAATTAATCAACATGAGTCTGTATAAAAAATGCACCTTCTGTGTATAAGGG  
TTGGTCTTGTCTATATGTTAAATGCAAACCTTTCTGATCGTGAAGTGTCTCAAGAAGCAAGAGCTGCTTAGCTAGATCACCTC  
ACCAAGCTCATCGAGTCAAACACCTTTCTGATCGTGAAGTCACTCAAACCTGGTGCAAAAAATGCAACACATGTTTACAAT  
AAGAAAAAACAAACAAAAAACAATCAGCAGACAACTGACCATTCTGATTTTTCTTTCTTTCTTTCTTTCTTTCTTTCTTT  
TTTTTTTTTTTTTTTTTTTTAAATTTGTCCTCAGTACCTGGAAGAAATGTTTATTTGAAATTAGATGAAAATAAGTCAG  
GCATTAAAAAACAAAAAGAAAAAACCTCTTTTAGGAATCTGTATCTGTTCAAATAAATTTGTTCCAGGTTTACTGAGA  
CGCGTCCCGTCTGTTTTTCTCCTGCAGCACTCTGACTGATCGTCCCGCTTCTCTTTGACCTTTTTTATTTGATTT  
AATCATCTCTTGAACAACCTGTATGGAAGAAAAAAGAAAAAAGAAAAAAGTCTG

>Sequ06472EST2

TCTCCAGGGCCAAAGCGACGTCCCTCTAGGTCACCCCAAGCGCAGAAGTCTCCTGCTCAAAGGAGACGCACACCTCCA  
TCCTCCTCATACCACCACCAAGACATAGGAGGAGCCCATGTTGCCTTCTGGCTGGCAAAGCAGGGACACACGATCC  
CCTGCTGCAGGAGCCGGCCGCTGTCCCATCTCCTGTAAACCGCAGTCCGAATCTTAGGGGTTCCACCAGTCCCCAG  
GGACGTTTTGAAAGTCTCCTGCACATCTCCATCAAACAGCAGCAAGCAACAGTCCCTTACACAGTGGCAACCCCTTC  
CGCAGAGTGTCCCGCAGCCAGGCGCGCAGCAACAGGACCCCTCCTCAAGCCCAAGCCTATGAGGAGAGCATCT  
TCCAGATCAAGATCTGTTTCTCCTCAACCAGCAGCTCAGAAACGTCCACCCCTGCATCTGCCTCCCCCTCACCGTCT  
CGCTCTGCTAGTGGTCCCAACCACCAGCCAAAAAGGCCAGCAGCGGTTCCGGCAGTCACTCCCAAGCAAGAACTCA  
GATGTTGACGGCAGTGGGAAGAAAAAGAAAGAAAGAAAGAAACACAAGAAAGAGAAGAAACATAAGAAGCAC  
AAGAAGCACAAGAAGGAGAAGAGTGGTGTGCTGGTAATGGAGATGGGCAAGAAAAACAGGTTGTGGAGGAGGATGGA  
GATTCAGAAGAAAGAAATCAGATAGTGAAGTAGATGACAGCTTGGACACCTAGAGAAGCACCTAAGA GAGAAGGCCCTG  
CGTCCATGAGGAAGGCCAGATGTCTCCATCACAGATGTCTGAAAAACAAGGGGCTTTCTCACTTTTGAATTTTCCA  
CTCACTCTTGATGTTCTGTCATCAACCTGGTTCAGCTTTAGAATGTACAAATGTTAATTTCTTGAGTCTTTTGT  
TTTTACTGGTTTTGGTACATTTCTGAAGAGTGCCTTGCATTAAGAGCTTGATTTGTGAGTTAGTGTATTATCTAACTGT  
AAAGAAGCTTGTGTGTCTATCATTTTTAAATTTGTTGAGCAGGGAACGGTTTAAAGCTCGGAGGTTAGAGTTGGGCAGG  
TTTCAATTTATTTCCACAGCCTACACTAGATTTCCATTGAGAAATTTATGTCATGTGTCAGTGTGCTCTGATGTGCAT  
GAACCACTGACCTTATGGAGTGTAGAGAAAAACAACATACAGTAACATACTGTACTACTGCCTTTTTATTAGTGGGA  
ACCAGTGACACAGCTGTGTGCACTGTTAGAGGCCCTAACAGAAATGCTTTGTCCACATTGTAACCTCAATAGAGGTT  
TGGCATTGTTTAACTGCTGTTTTTCTGACTTTAATGATCTTGTTTTTATGACTAAAAACAGTCTGATATGATACAGAGT  
ATGCTTTAATTTTTCAAATGAATTGATATGCAATTTTTATGTTGACACTCTTGCACCAAGCTAATCTCTGTGGGACTGC  
TCTATAATTTGATTTAGCAACCCCTGGCTCTTGTCTATCTGGTCTCCTTTTCAAGATTTAAACCTTTTTATAGGATTTG  
TGTATTTTCTTTAATAAAGGGGCTGGAAGATTTGATCAGTTTTGTGTTGGTGGGATCTATCAACTGACAATCGAT  
TTGGATGGATGCAGATAAAAAAATCTTTAAAGCAGGTAATAATGCAGAAATGGTCAATTTACTGGGTTTTGGTTCTGTT  
ACAGTTCACCTACATCTTCTGAAGCTGGGTGATGATATCTGCCTGCATGATAATTTCAATGAGACAGGGCC

AATCTTATGTATCTGCTAAGTCAAACATCTAATGACAACATGCTGCAGGATATTCAGCAGCTGATCAGAAAGTATGT  
GTTCTGTG

>Sequ06483EST2

ACGTCAGAGGGAACAGCAAAAAGAACAAAATGGAGGAATATGCTAGAGAACCATGCCCTGGAGGATTGTGGACGATTG  
TGGGGGAGCTTTCACCATGGGAGCAATTGGAGGAGGAATATTCAGGCAGTAAAAGGTTTCAGAAATGCACCC TCAGG  
GATGAGCCACAGAAATGAGAGGTAGCTTGACTGCCATCAAGACCAGAGCCCCACAGCTTGGAGGTAGCTTTGCAGTATG  
GGGAGGCCCTTCTCCATGATCGACTGTGGTTTAGTAAAAGTGGCAGGGGAAGGAAGATCCCTGGAACCTCAATAACAAG  
TGGGGCCATGACAGGAGCTATCCTCGCTGCAAGAAATGGACCAGTAGCCATGGTAGGATCTGCAGCCATGGGAGGTAT  
TTTGCTGGCATTGATAGAGGGCGCTGGAATCTTGCTCACTAGGTTTGCCCTTTCACAGTCCCAACCGGGCCTCAGTT  
TGCAGAGGAACCTGCCCTGCTCCCATGCCACCCCTTCCCTTTGGAGACTACAGACAATATCAGTGAGAGGACTCCCC  
ATGCTTTTATCCACTAGGCCTTTTTGAATTCCTTGCTGAAGTTACAAAGAAGAAATGGGGATGTAGAATACCACACAT  
CAAAATAGAAGCTGCACCCGATTTTATGGACTGTGTCAGAAGTGAAGGACAAAATACAACCTTAATTTTCTACTCAAG  
AGCCATGTACAGATCTGCCTTTTGCATTCTCAGCCTTGTCGTGTGCATCTGTTTACCCAACATTTGTTAAATACAG  
AGATGTGGTGGGATTTATTTGTTTGTATGTTTCATAGGCTTGTTGGGGATGAGGTGTGTTTTCTATTTTGTTCATATAAAG  
TATATATACTGCATGTAGCCCAACAAGGGAATTCAGGACAGACCAGCTTGGATAATGTTGAATCTTGCAAAAACACA  
TGTCACACATGGAACGTAATAAAATATACTTATATATAAGTATAATACTTATGTGTATATACAGTAAAAACTTTCTGC  
TTGTATTCAGTCATGTTAGTCTTTATTTGCCTTAAATATGTCACCTGCTTGTGCTGGCCACTGTCACCTGGCTGGCTC  
TTTTATTTGGTTTTATTCAGAGTTATGAAGGCAAACATCTATCAAATACAATCTATTCCTGGAATATTAGTTTTGTTT  
GAAAGTGATTTATTTATTTAGATTGTAAGAGTGTGTGCAAGATTGTTGTATTTCTATCAGACATTGCTTTTGCATTCA  
ACACAGAGGTGTGGAAAAGGCTGCTAATGACAAAGGATGGCAAAGACAGTACAAAATAAATGGAGAAACTCGAGCAAGG  
GATTGACGCATATACTGTATTAATCTGTATGACAGATTGTATTTGGTACAAATAAAAATGAGTTGTAAGATCTGTC  
TTGTAGCCTTATGAATACAGTTATCCTATTAGTTCTGGTCTTGATTGTGAAAAAT

>Sequ06484SNP2

GCTCTGTCCAAAGGTAACAAAATCCACCTACAAGCACTTCTGAACTCTCTAATTTCTCATGTTTGTCTAAGCTGTACA  
AAAACCAAACGTAAAAAGACAAGTGGTCAGTAGTTCTAGAGGATGCTTATGTGTAGGGTTATTGTTTTACACATTA  
GTGTTTTGTATGGATTAAACAAAAAACATAACCTCTTGATTTGTTGGCTTTATAGGTGCTATTAGGTGGATTTTTGTTG  
CTCTGGTCAGCAGCTGGCCGGCTGTTTTCCCTCTTTCCAGTCTTTATGCTAAGCTAAGATAACAGGCTCCTGGCTGT  
AGTCTTTGCAAAATATGCATATTTCTAGTGTATTCCTTTGCTTTAAATAAATAGTTTTATTTTTATTTTTTTATAAG  
AAAAGGGATAACATACATGCTTTGTTAGACTTTCCGGTGGATGAACTACCTGAGGTGAGTACATATCAAGATTACAT  
TACCTTCTAAGAGGAAAATATGGTCCAATTCCTTTACCTTTTATCTCAGTTCCCTGAGTTTGGTGTGTGTAACGACTTG  
TAGTTGCATGTGTGCTGTAATCATCAACGTATAAATTTGCTTTAGCTTTTCTCTACACTGTCACTCACACTGGAAAA  
GTTAAGAGGCAGAGTGTCTCCTCACCTGCAATGCTGCATTTGCAACACACAGAGGTGCTCAAGTATCACAGTCCCCTGCT  
CCACATACAGATGTGGTGTATTGACCATGTTTTTGTCTGTACAGTTGGTAATGTATGAATGAGTTCTTACTGCTAACAC  
AAAAAGAAAAGAAAAGAAATCAAAGAGGAGGGGTCCGTGTTGTATTACACAACCTAACAATAGAAAATGAACTCACAA  
AGGTTTTTATTAACTAAGTCAAAGTTGGTGTGCATATTTGCCATTGCAGTGTAACTTTTTACTTCACTTTTCACTGTAT  
TGTGTTTTTAAACAGTTCTTTCCATTCCACAGTATCCTTTGTGTTAATTTCTGGGTTTCTGTGCATGTGTAACATTTGTC  
TGACATTTTTTCTCTCAGGGTTCCACCCACATCTCAAAGAATCAGATGGTCTTTCTAGTAGACCTAAATGGTACCT  
TTAAACTATTTATAGATTCAGACTAAAACCTTGGGCATTTAAGTTAAGATTATGCTTTTGTGACTCTGTAATGTATG  
ATATTGGGCCATATTACAACCTGAAAAAGGTCCTTGATAGTTATATGCAGTTAATTTGTTGGAATGGTAATTGACATACT  
GTTTAAATATATTATCTTTAATGCTGAGTTTGGATATGTCAGATGACTATGAAATTTTTTTGTGTAGTTGTTAATGG  
CAAGCTAATACGGTATCATGCTGCTGGTAAACTAAGCAGTTTTTTAAGTGAATGGTAAAGTTCAGACACTATAATC  
AAGAGTGTGTTATTTGATGATTGAGAATTTCTGTTGAAATTTTTTTTCTCTCTTATTTCTCTGCACAGGAATAAATAA  
TGTTAAATAT

>Sequ06489EST2

CGCCGAGTGATTTCATCTGAACCACAGAGATGGCTTAGCTAGTTTGTAGTTTACTCTATGATAAACATGACTCCGAC  
TCGGATAAATGTGAACCTATCTATTTTACGCTCATAATACTCTTGTTTATATCATACAACCATCCAACCATGAAGCTG  
ATCCATAAAGACATTGAAAAAGATAATGCCGGTCAGGTGACTCTGATGCCAGAGGAGGCAGAGGATATGTGGCACACC  
TACAACCTGCTGCAAGTGAAGGACAGCCTGAGAGCCTCCACTATCAGGAAGGTGCAGACAGAGTCCACCCTGGAAGC  
GTGGCAGCTCCAGAGTTCGCACTACTCTTACTATATGTGTGGAGAGATTCGACTTTTGTGACTCCAGCCTGCCAGCTG  
AGAGTAAAGGGCACTAACATAGAGGAGAACCAGTATGTCAAGATGGGGGCTTACCACACTATTGAGCTTGAGCTTAAC  
AGGAAGTTCACTTTAGCTAAAAAACTGGGACAGTGTGTGCTGGATAGAATCGAGCAGGCATGTGATGCAACCCAGA  
AGGCAGATGTGGCAGCTGTGGTAATGCAGGAGGGTCTGGCCAACCTGGTGTGGTGACACCCGCCATGACTCTGCTCC  
GTGCAAAAGTGGAGGTACCATTCCTCGCAAGAGAAGAGGAAGCTGCACCTCAGCACGAGAAGGGCGTGAGAGGTTCT  
ATGAGGCTGTGATGCAGGCGATTCTTCGGCACATCAATTTGATGTGGTGAAGTGTCTCTGATTGCCAGTCCAGGGT  
TTGTGAGGGACCAAGTTCATCACCTACCTCTTTAAAGAGGCAGTGGCAGGACAACAAGATCCTGCTGGAGAATCGCC  
CCAAATTCATGCTGGTCCACTCGTCTTCGGGTCATAAGTACTCACTCAAAGAAATCCTCTCTGATCCCACAGTGACAA  
GCAGGCTTTCTGACACAAGGCAGCAGGAGAGGTGAAAGCCCTAGAGGATTTCTATAAGATGCTCCAGCATGAGCCTG  
ACAGAGCTTTCTATGGAGTGGCTCATGTGGAGAAAGCTGCTGATGCCCTTGCATCGACACTTTGCTGATAAGTGATA  
AGCTGTTTACAGACATCAGGACGTTCCGACGAGGAGTCTGTTACGTTCCGTTGGTGGACAGCGTGAGAGACAATGGCGGCA  
ATGTCAGAATATTTCAAGCCTTCATGTGTCTGGTGAACAACCTGACTCAGCTGAGCGGAGTGGCTGCCATCTGCGGT  
TTCCCATCGCCGACTTACAGAGGGCAGGATGACAGTAGCTCAGATGAAGACTGATCCCCGAGAATGGACCACAGAG  
GAAAAATCATTTGGAGAAAAGAGGTGGTCCATTGTTGCAGATAACACAAGACTGCGTTGACTCAGTGTGTTATA  
AAACAATAAAGCTGCTGTGTTATGGTCTATGTATTCCACCTCTGCAATATCCACACATCTCTCAGACCTAATTAACAC  
ACCTGCTTTTCTAAAGTGGCCATAATATCACATAATTAGATGAAGTTTTTTGTTTGGAGGTGAGTGTCTTTGAGATGGG  
GCATGTTAAGCAATGCCAGAGAATCTTCATAAGAATGCCAAACAAAAGGAATGTAATTTGTTGCCAAGTTTCAAT  
GAAAACGTTAGTTTTAAGAAACATTAAGCAATAGGAAAAATGATTTTTCTTTCCAAGTGTATATACAGTTTTATCTT

>Sequ06491EST2

GATCCATTATGAAAACAACACACCCCTTCCTCACCATCAGCAGCATCACTCGCACTATTGAGGTGTCTCACTGGGGCAA  
CATTGCTGTGGAAGAGACCATCGACCTGAGGCACACAGGAGCCGTCCTTAAGGGCCCTTTTACGTTACGATTACCA  
GCGTCAGTCAGACAGCGGCATCTCATCCGTCAAATCCTTCAAGACTATCCTTCTGCCTCAGCCCAGGATGTCTACTA  
CAGAGATGAGATCGGGAACATCTCCACCTCCCACCTTCAGATCCTGGATGACTCAGTGGAGGTGGAAGTCAGGCCCG  
CTTCCCCTTTGTTTGGAGGGTGAAGACCCACTACATCATTGGCTACAATCTGCCAGCTACGAGTACCTCTACACCT  
GGGTGACCAATATGCACTGAAGATGAGACTAGTTGACCATGTGTATGATGACCAGGTCATTGACTCCTTGACTGTGAA  
AATTATCCTGCCAGAGGGGGCCAGACACATCCATGTGGACACACCGTACAAAAATTGATCGTATGCCCAACCAGCTGCA  
CTACACATATCTGGATACCTTTGGCCGACCTGTGCTGGTCGCCACCAAGAACAACCTGGTTGAGCAGCACATTTCAGGA  
TGTGTGGTTTCATTATAACTTCAATAAGATCCTGATGCTGCAGGAGCCTCTGTTGGTTGTAGGGGCCTTCTACATTCT  
TTTCTTCACTGTCATCATCTATGTTCTGCTTTGACTTTGCCATCACAAAGGACCTGCTGCTGAGGTTTCGTATGAAAGT  
AGCCTCCATCACAGAACAGGTCTGACTCTGGTTAACAAACGCTCTGGGTCTGTACAGACACATGGACGAGGTGGTCAA  
CCGCTACAAGCAGTCCCAGGACACTGGTGCCTCAACAGTGGCCGGAAGACGCTTGAGGCTGACCACCGCACTCTCAC  
CAATGAAATCAGTCCCTTCAGGCCCGCCTCAAAGCTGAAGGCTGACTTGGCTGATAAGGTCGGGGAGGTGCAGAA  
GCTGGATGGCCAGGTGAAGGAGCTGGTGTGCTGTTCTTGCCTGGAGGCGGAGCCTGTTGGTGGCGGGTAAGGTCAAGAA  
GGAGGCTTACATCGAGAGTGAAGACTCTGACCAGCAGGAGACAGGAGCTTGTGACCCGTATCGACAGTCTGCTGGA  
TGCCCTCTAAACTACTCCTGCCACACTAGCACACAAAAACACACACATTCAGCACCCCTGCTACAACATAACAACCGAC  
TGCTGTATGTATGAGAATTAAGAAATGTGACACAATTTTAAACAATTTTTTTTTTTTACCATCAATTGTTCCCGA  
CATGGACTATTAACATCTCATCTTACAGTAGTGAAGGGTTTATCCAAACACTTGTGCCTTTGTGCCTTTGTGATAA  
TGAGTGCCTGACTGCTTCAAGTCTACAGCAGCTACATCACACGTTTGGCTTTTTGTTTCTGTTTTGATTTTGTAT  
AGCTACACTTTTGTACACTTTGTTTCAGACTTGACTCTTCAATTTTCAAATCTGGACTCAATTTTTTTTTTTCATTCTA  
TATGTGCGGTTAAGGATTTTTTTTTTATTTCTATGAATAGCTGAGGGGCCAAGTGTGTTGCAGTCTCATGTCTTTACTC  
AGATATGCCATATTTAAGATTGAATCATTTTTTAGCTCTTAAGAATGAAGGTGATAGTCTTTTCCAATCTTAGCTCTC  
TTGCACTTACTTTTTTCTACTCGCCCCTGACTGATGTTTATATTGAAAAAAGTTGAAGCTCTGATTCTGTGTCATCC  
CAAATGCTTGTTTTTGATGTCCCTCAGTCATATTTTCTATATTTTGTATCACTTTGTTTTGTAAGTGGTATTTTTTT  
TACCATGAGATTAGTGAATACATGAGATTAGGTTATATGTGAGAAAAGACATGAGAAATGGGACACAAATGTTTGTGA  
AATGGCAATGATATGAAAAGCTGTCAAATTTGAAATAAAATGTGGAGAACTACAAAAA

>Sequ06494EST2

GCGGAAACATGGAGGCTGTACTGAGTGATGTGGTAGCTCCTGAAGACCTTTTAAAAATTTGAGAAGAAATACAACAGTG  
AGCTGGTGAAGGGAGCAGTCTCCAAAGAAACAAAGTTGAATATGCTTGGTGTCTGATCAGGAGTAAATACTCGGAGG  
ATATCAAGAAGGAAATGCACCTTTGGAGGAGCTTGTCAAAGTTCATCAAAGGACGACTCCCAGGACTTCTTGTGTTT  
ACCTTGCAGTGGCCAAGTACAGACTCAAAGAATATGAAAAAGCCCTGAAGTACATCCGGACCTTCTTAAGAATGAGC  
CAGGGAACAAGCAGGCTCTGGAGCTGGAGAACTGATCGACAAGGCTTTAAAGAAAAGACGGCTTGGTTGGCATGGCGA  
TCGTTGGGGGAATCGGTCTCGGCGTGGCCGGCTTAGCGGGACTCATCGGCTGGCTGTGTCAAAGGGAGCTGCCAAAT  
CCTAACCTGGACATGAGAAGACGTGTCTTTGTTTTGCTGGACTGATACACTGACCTTTCGCTGCAGAGAAAATTA  
GCTTGTGTTAAAGCTTGTAAAGTTTGTGTTGAAGGATTAACATTTTGGTTTGAAGTTGAATATTTACTGAAGCTTA  
ATAAAGGTTTAAAGTAAAAGCTGATTAACCTGTTTCTATATTAACAGGGGTGAAAGTCACTATACATTTGACA  
TTACTCTGTCCCACTATAGTATTGCACCTTTCATATTTACTATGTAATAAATTAGAATAGATAAGGTGACGCTCAA  
CTCTATGTAATTTATAGTTAGTGCACCTCAGCCTAACTTCTAAGTTGAAATTTACATTTTGTAAAAA  
AACTATCTTTGTCAAAGTGCAGTTGTGGTTCTGTGACTGTGTCAATTTTCAATAGTTTGGACATAAAGAATTGTAAGG  
AAAGTGTACTGGTGCAGTGGGAAGTGTAGCCTGTAATGCCAAAAGGAACAGTGAAGTAAACAGTACTCTGCTACACT  
GCTGTTAGGAACTGTAAGTCCAGCTGCTGCTGCTGTGAGGCCAGAGAACAGATGCATTGCGTTTTATTTGGACA  
AGAAGTTTCTTTTCATTTGTTCTGAATACAACCTAAAGATAAGGGTGGCAGTGCATTTAAATTAATACATTTTGTCA  
GTAATTTGCATTTGCAAACATATATCTGTGCTGCATTTAATGACTTGTGTTTTCCATCTTAGTTAAATAAACAAT

>Sequ06517EST2, Sequ06517SNP2

GAGGGAAAGTCGTGACCCTCAGGCAGCGAAGAAGTGCCTGGCAGCCATTGAGGAGTGTGCCCAAACCAGAGAGGGCAA  
CCTTTTAGCCCTGGCCGTCGAGGCAGCTCGAGCCAGATGCTCTGTTGGTGAATCACTGATGCCATGAAGAAAGTGT  
TGGCGAACACAAGGCCAGCCAGGATGGTGGAGCGGGCTTACCCGACGAGTTTGGGGAGCATGAAGAGATTTGCCCT  
GACCCACAACAGGTTGCAGATTTTAAAGAACGAGGGCCAGGAACCTCGACTGCTTGTGGCAAAGATGGGGCAGGA  
TGGCCACGACAGAGGAGCCAAAGTCATTGCCACAGGGTTTGGCCACCTGGGCTTTGATGTGGACATCGGACCCTTT  
TCAGACTCCCCTTGAGGTTGCCAGCAGGCGGTGATGCTGATGTTCACTGTGTGCGGGTTCAGCACTCTTGGCCGAGG  
ACACAAGACCTGGTCCCAGAGCTCATCAAGGAACACGGAAGCTACAACAGGCCAGATATCTTGTGTCATCTGTGGAG  
GTGTCATCCCACCACAGGACTATGAGTTCTATACAGAGTGGTGTGTGCAATCTTCGGTCCAGGAACCAGGATCC  
CACAAGCTGCAGTGGAGGTTATTGACAACATTGAGAAGAGTCTGGAAAACATCCGGCAGGCCATGTGAACCTTAA  
AAAAACTACAACAAGAGCTGTCTATTCATGCTGTGCCAAGAACAGAGTCAACAAGTGCAGGCAACAATTTGTACAGA  
ATCTGTTTGTGCTGGTAGCATGAAGTCGTAAAAAAGTTCACAGCATGTACAGAAGTTAGAATCACTACCAACCTGTG  
GGGATGTTATGCTTGTATTAACACTCCATTTCCCTGTATATCAGATTTGATTTGAACTAGTAATAGGATCCCCAGAGTT  
TGCAGTAACTTCAAAAGAAACAAAATTAACATCACCATAAAGAGTGTAGTGTTTTTTTTTTTTTCATTGAGGGAA  
CACTCAAATCTAAAGAAATACTGTACACATAAACGTTTCAGATCGGTAATGGGGATTGAACACATGCTTGTGTGA  
GAATGCATTGGTTGCAGGGAGAGTAATATCACTGTAATATCTTTGAAATCTAAAATAAATTTGGGAACCTGGGACC  
CTTGGTGAACACTGTAGACTGTAATAGGATATAAATTAATTTACAGCAGGAAATCAGACTATATTAAGACCTTTACC  
CACACTTACACAATGGAACATAACATTACGTTTAAATCAAATTTGGAACAGCTTAAACAGACACAGTATCATGTGACAGAAA  
TTTGGCTTGGAAAGAGCAGAGCTTTTTTTTGGCCATCAGTATAAAACAAAGGACTATAAACCTTGGAAATGTAATGCTTTT  
TTCGTAAGATGCTGTGTATAATTTGCAGTTACCTAGCAGGGTGTGAATAGTGTAGTGTAGTGCAGGATGGATAGACA  
GAAATTCACATCAAACGAACCTCTGTGGAACCTTACCTCTGATTTTTATGTTTATGGATATATCATATTGACAGT  
GGCCTTTTTCAATAGTTGTTTTCGATCTTTCCCTCCCTGCATAATGTTTGAATTTGACCAGCTTCAGTCGGTGATCACAAT  
TATGAAGATTTCCGAAATGGTATTTTTCTATGTGTGATTTGAATCAGAGTTGGTGTCTTTCAGTCTAAATAAAGTAT

GTGAAC TTTGGAAATGTGACTTGCATCAGAAGATTGTGTAAC TTTCTACGCC TCCGCCCGGGCAGACGCCAGGGGCTTG  
GAGGCAATATGTTTCAGGTCATCCATCCATCCG TCCATTCTCGTGAACAGATATCTCAGTAATCTAATCTA

>Sequ06529EST2

CAGACTTGTGCTGGCATCTCAGAGGGCAGCCCCATTTTCCAGTCCAGTCC TAGATGTGCAAGCTGATCAACCCCCTTT  
GCTGCAGTTCACCTGACCTCTCAGTTAGAGCCTCCCCTGCTCTCCAGCCTTCTGTGGACTAAACTGACCTCTCAGGG  
CTGTCAATTCACAAC TCGGACATCCACAGCTGATCTACACAAGCAAAGGACCAGTAACACTAAGCTGTGGACCAAGGG  
GAGCAAAGAGAGTGCACCATACTTCATTTGAGGATACCCAACCTCGTCTAGTCCAAGTTGAACCCATCAACATCATCC  
CCCACAGACTGAGGATCCAGTGGTGGAGCAAGACATTTCCATAGACTGTACATTTCTTTGTGGGACTATACGTGGGC  
CCTTTACAACAGACAGAGACTGATATAAAAACCAAGACAAATCCATCTGATTCAAACAACATCTTTCCACATGGCAACC  
ACAGGTATGCAGTTGCTGGGCCTAATAATGTCCATTGTAGGCTGGGTGGGTGGGGCGGTAGTCTGTGCCATCCCCCTA  
TGGAGGGTCACTGCCCTTCATCGGTAACAACATAGTGACGGCTCAGATCATTTGGGAAGGCCTTTGGATGAATTGCATT  
GTCCAGAACACAGTTCAGATCCAGTGTAAAGGTGTATGACAGCTTACTGGCTCTGCCAGTGACATGCAGGCTGCCCGG  
GGCCTCACAGTGTCTCCATCCTGCTCTGTGGCCTGGCTCTGGCTCTGGGGTCTAGGAGTCAAGTGCACCTAAGTGC  
ATCGGTGTAACAGCCTCAAGGCCCGTATTGCTCGCATCTCGGAGCTCTTTTGGCATTGCAGGGTTCCTCTACCTT  
GTGCCCGTCTGTGACTGCCACTCCATCATCAGGGATTTCTATGACCCACATGTAGCGGCTCCACACAAGCGT GAG  
CTTGGCCCTGCCCTATACATTGGCTGGGCGGCTTCAGCTTTGCTCCTTATTGGAGGATCTCTGCTCTATGCTGGGTCA  
AGTCCACCTGGCATCCAGGCTCTCCCACCTTCAGCAGTGGAGAAAGTAGTCTCGCAGGGCACCTACTACACAAGTC  
AAAGGTTATGTCTAAGTTCCCAAAATGTCTGAATGCCTTCAAGTCTCACAAATCCACCCCAAAACAATGACAAACCTGT  
TTTTTCTCCTCTTGATTTTGTCTCCTTGTAATTTTTATATTTAATGTTATTCCAGTTTGCTTTTTTTCTTTGAAAAGC  
CGCAGGAGGCTGTTTAGGAAAAAATTGAACTCATTTTATTATTTTACATACCTGATATCTCAAATAACATTTTTTTCTGT  
TTGTCAGTGTAAAA TACAATAAAAACCTTTGGTTAGTACTAAAAA AAAAAAACCACCTACCT

>Sequ06599SNP2

GGACCTGGCTGATAGCAGTGGTGTGCCGGAGTTGGTTACACGGAGCTTTGCTGCAGCATTGGCAGGAAC TGCAGAGGC  
CATCCTGACGCCGTTTGAACCGGTGCAGACTCTCTACAAGACCATCGGCACCACGCCCGCTTCAAACAACACGGCCCA  
CACCTCCGGACACTTCTGACTGAGTATGGTGTAGAGAGTGTACCCTGGCCTTGTGCCTATACTACTCCGCAATGG  
CCCTAGCAATGTGCTCTTTTTTCGGGCTCCGGGGGCCATTAAAGGAGCAGCTCCAGAAAGC CACTAGCCGGGCGAGTCA  
CTTGGTGAATGATTTTGTGTGTGGAGGGGTGTTGGCGCAGCCCTTGGCATTATGTTCTATCCATTAAATGTGGTAAAG  
TCTCGTGTCTCAGTCTCAGGTTGGCGGGCCTTCCAGCCTTGTGGGAAGGTGCTGCTAACAGTTTGGAGAGAGAGGGGT  
GGCAGCTTGGCTATGCTCTCAGAGGGGCCACCTCAACTACCACCGTTCACCTCTCTCTGGGGGATCATCAATGCC  
ACCTACGAGCTGCTGCTGAAGCTCATATGAAGAGGGGGTGACAAAAAGAAAGAAAGAGAGAGAAAAATATTTAAAGGGA  
AAAACCTGTAAGGAGTAAATAGAGCCAGTTTGTAGAGAAGAAGGGTAAATGTAAAGTAAAGCCGATGCACCTTGTGTCT  
GGCATTTGTTGGAGTTTCCGTAAC TGAAGACAGCAATGAAGTTGCACCTTCTGACAGGGGCCAACAGTCAATTGTGAGA  
TAACCACCTGCCATTGTGACTATTTACTGTTGTGACAGTATTA AAAACTAAACACACGCTTTAGCCTACACAAAACCTT  
GTGCCAGGGTCCAATCAAATGCCCTTGT TTTGCTCTGTGTACAAAAATTTTGTGGAGCGAACTCCAGCGCTTTTTTTT  
ACAGTTTCAAGCAAAGCTTACTT GACTGGATAAACTGTTTTATAGGAGAAGCTGTTTCTTTCTATGTGCTGTGTGCTG  
TGCTGTTTTGTAGACAATATCCATCTGTTTTGTTTTTTGACCTAGAGCACTTTGTCTGTGAAGCTGAATTTCTGCCA  
TTAACTCAAACACTTTTGTGCTTTTGACCATTGAAATACCCCAACAATTACTGTCAAAAAGAATGTAATAAACTGTG  
TGAGCGTTGGCCCTTTTATTTCTCGTTACTACTCCACTCCACCAATTCAGAGTACATGTGCGAGAGATCAGGAGGCTA  
AGAAATTGCTAAAATGAGTATTGGAGATGTACATATTCTTGGACATACGTCCAGCAGACACAGGCTATTTTAAAACC  
ATTTCAACTTTTACACATAATT CATCTATGTGAAGTGCAGAGTCAAGTATTGTTTGTCTTGATTTATTTTCTGAAGTG  
CTAGTGGCAGGTTGTGCTGTTATTTGAGTGTGGACAAGTGCCATTGATGTATATGTG CAGTAAAACATACAGTTAAC  
AC

>Sequ06616EST2

ATGCCTCTATTGGAGACGTGGAGCTCTGCTGTACATGTACTGCCACACCCCTTCATCAACGAAAACAGTGGATCAAGAA  
AAACAAGGATACATTCCTTAAGTGTATTCAAGAAGGTGTGCGCTACCTGATGCGGATGCTGCAGGTGAGAAACTCTGT  
GAAGCTCAATGATGGGGTGGTGTCCATGACACTGCTACAGCAGGCTTCCGTCTGGAAGGCATCTTCTCAGACACACA  
CCTGTTGACGATGATGTACATTGGAGAAATGTGTTTTCTGGGCAGTCAAGTATGAAGACTGCAGTGTGACACAATGGA  
TCGGAAGAAGATCGGCTCCAAGTTTCGGGACATTTGGCATTGCATCCATCAACAAATATGTGCTTGCCTGCGAGGGCCC  
TCTGCAGGGCCAGGCTTGAACACCGGAGAATGCCAAGGAAATCCTTAGTATTTTACAGTCAACCAAGATGCTCCTGTG  
TTGAAGTTGCCCTCAGGCACAGATCTAAGTTCAGTATTCAAATGTGTGTCAACCCCAATAAAAATTGAACCCATCAGT  
GGGATGTAATGTTGTGGAAGTTAAGGGGAGGCACAAGGAGTATGTGAAGAGGAGTCTTTGGATCAGTGTCTACAGGCA  
ACCTAATCCGATTC AATCGGCTCCTGGCCGAAGCAGGTGAATGAGAGGTTAGAAAATATAAGATTGGTGGTGTAAAA  
CTGGCAGGGGCTGCAGGGGAGGCTGTTGAATAATTTTTTGGCCCTGTCTGCTGAAAAAGCAGTTATCATCCTGATTAC  
AGACTGTTGACTGGGGCCTTGT TTTGCTCTAAGAATGTGTTATAATAACATTAATATTAATAAAAAGGTTATTTAA  
TAAAATTGACCTTTTTTTTCCATTTTTTAAGATTTGTTACAAGTTTTTAAAGATAATCCAGCTAGGAAACAGACATTGCA  
CAGTAACATTTTTTA

>Sequ06687SNP2

AAACGCTCACTGAGATTTCTCAGTCTCTCTGGATGTTATCAAGTCACTGATTTGGGCTTGAGGGCTCTGTCTCAGCGT  
GGAGGGCTTCCCTGTCTTGAGCATCTCAACTTGTCCGGCTGCCTCTTCATCACTGAGGTGGGGCTGCAGGAGCTGGTG  
TCAGCCTGTCTTCCCTCAATGATGAACAGTTCTATTACTGCGACAACATCAACGGTCTCACGCAGACACGGCCAGC  
GGCTGCCAGAACCTGCAGTGTGGCTTCAGAGCCTGCTGTGCTCTGGAGAGTGATCCTGCCAAGCAACGCTCTCCTGA  
AAATGTCACGTCTCTTTTTATTGCACTTTATCCTGGGAATACCATTTGCTGTACTTTGTGTCACTTAAAAATGTTTC  
TGGATGAACTGTAATTTTTGCTCCTGTTTTTTCCATTTCCATCTATATTAATGACACGATCCTTCAGAGAAAGAAA  
ACAATGAGGGGTGATGATGAATTTGAAGCCTCTGCAAATGTACATCCTGGCTCCCTTTTTTTTTGGGTTTTGAAAAGT  
AAAAC TAGAGAAACATGACACCAAGTACGTAGTGTCTGTAGTTAAACTGTTTCTTTTCACTAAAAC TATACTCAT  
ATGTAATCTGCTTCTCCCTTGT TTTAGTTGACCTATTTATAATCAACAAAGTGTAACTGACTGACTGTACTGTCAA

AGTGTGTTTTACTTTGTTTTATCTTAAACAAGCTTTGTCATTTAATGGAGAGAGTGATGTGGAAAATTAACAGGAG  
TGAACCGTCACTGCCCTCCACTTAGACTGATGTGAACAGCTGTCACTGTTGATCTGCATATACGTTGATGAGCCAAGTGA  
CCACTCACAGATGTAGAGAATAACACTGAATGTGGCATAAATTAAGACATTTAATAGGATGATATTTTACTGTATTAAG  
TAAATAACAAGAGGCTCTACAGCAGCTTTTACACACAGCGTCACACTTTTGATAAGATGTCTGGCATTAAATATATGG  
GACATCTCGGGATTGCTGCATAATCTCTAACAATAAATAAAGTCAAGTCAAGTCAATAAGTCAAAACAGAAATGATTCCACA  
ATAGTTTTTTTTTTCTTTCAATAACAGACTGGAATGTAAAGTCCCAGCATTGTTTATGTGTTGGTCATTTGAAGTCATG  
AGCAAACCATGTGTACGGGCTGCCTGACTCTTGTACAGCGCCTCTTCACTTTTTTTTACATTTGTATGTTGCAGCC  
TGATGTGAAAAATCATTAATAATAAATTAATTTTTTACCCCAAAAAAAAAAAAAAACCACCTACCTACTAG

>Sequ06696SNP2

TTATCTTGTGGTAATCGTTACAGTCATCCATACTCACAACTTTATAAATGAGTGCAGTTGTGAATGGATGTGATAAA  
TTTAATATTGGCTTGTGTGAAAAATTGCATCACTGTGAGTGTCTTCCCAACCTGTGCTTTCCTCAGAATTTTTAAAA  
GTTTTGATATGTTTTGGTTTTCTTTTACAGTAATACCAGCAGTGCAACCAGTGGTTCGCTTTGTGGAGTAAATGCAGCAGC  
TAGAAAGGGCTAAACGCAGCTCATCATGGATAAAAACAAATCAGGATTGCTGGATTTTGTAGAGTACTAACACTGGA  
TAACATAGGTCTAAAGCGTTGAAAAATAACTCTGGAGGGGGTTTTTATACTTGATTCAAAGGGTCAGAGCAGGGAAA  
ACAGCATAACCCCTCTTTTACCAGCATGTCTCTTTACATTTCAAAGCAGGTTTCAGCTACTCCAGCTAAAAAATGCC  
CATGAAAAGACGGTGTGAGTTGCTGTGAGTAGCCACAAAGTATCACGTATTCTTTTTACTGTATGGCTTAAAAGTGTG  
ATATTGACCTTATTGTAGCATTTTTTTCTGCCTTGTACTACAAAACCTCCAGAATGGAAATAAAGTGTAAAAACAC  
ATACACACAACAACAACAACAACCTTATGGCATGAATAGTGTCACTGTATGTGTTTTTCAATTTGTTTCTGTGCCTTA  
TTTTATCACAGCTTTTCACTGACGATCATCGATAAAAACCTCACACTTGTGTTAATCCTGTATTTCTGTGTGTGTGC  
TTTTGTGGAGATGGATATTCATAGGTTCCGCTGTATCTGGCAAGTATTTTTTGTGAAAGAAAAAGAGATGACAGACAG  
AGGATAAAAAGGGACTGTGTTCTGTGATGGCAACCATGTTTTTCAAGTGAAGATATGAGAGAGCTAAAAGTACGCTTTGA  
CTGTTTGTATGGAAGAAGGGAAATGGTCTTACCAGGCATATACTCACACTCCCTGTAATAGTTTTATCATTTGTTAC  
AGTCTGCACCAGATGAACCTATAATAAAGTTTTAAATATATAATATACCTGTTTGT

>Sequ06704EST2

TGAGCCAGAAGAAGTGGAGAAGAACGTATTCTCCTTCTACCTGAACAGGAACCCAGACACTGCGCCCGGCGGTGAGC  
TGCTGCTGGGAGGAACCGACCCCAATACTACACCGGTGACTTCAACTACGTCAACGTCACCCGCCAGGCCTACTGGC  
AGGTCCACATGGACCGGATGGCAGTGGGCACCCAGTTGACCTGTGTAAGGACGGCTGCGAGGCCATCGTGGACCCG  
GGACGCTCTGATCACCAGCCCTCTGCCGAGGTCAAGGCCCTGCAGAAAGCCATCGGAGCCATTCCACTCATAACAGG  
GACAGTACATGGTGTGTGACAAGGTCCCGTTCGCTGCCGTCATCACCTTACCCTGGGCGGACAGAGCTACAGTC  
TGACCGGAGAGCAGTACGTCCTCAAGGAGAGTCAAGGTGGAAGACCAATTTGCCCTGAGCGGCTTCATGGGTCTGGACA  
TCCCGCCCGCCCGGCCCCCTGTGGATTCTGGGAGATGTATTTCATCGGCCAGTACTACACCGTGTTTGACCCGAGAGA  
ACAACAGAGTGGGCTTTGCTAAGTCCAAGTAAGCACAATGGCATTGAAACAATATGTTCAAGTGCAAAAGTAAAAGT  
ACGAGTTTCAGGAGAGAAAAATTCAGAGCTGCACGTTTTCTGTTGCTTTGCAATCAAAAAGTATTTAGCAATAGATGT  
TGTGTAGAGCATAAATGCACTGATTTCCAGCAGCGTGCCTGAACCAGACTGGAGAGTGGATAGGTTGTGTGATGGTT  
CATATGATCAGGGATGAGTTGATTGTATCGGTACTGTCCCTTTTCAAAC

>Sequ06738EST2

AGACGCGGAAGTATTTGCAGCTGTCAAACAGATTTTTGTAAATCAGTTTCAGTTTTCTGCTGAAAGGCGACTAACAC  
TTGACGTTACTGCAACATGGACTGTCCACGCTGGCTGCCTCTGGAGTCAAATCCAGAAGTCATGACAAAAGTTTGTTAA  
TTGTTTGGGTATGAGCCTACCTGGCAATTTGGAGATGTATATGGATTGGATCCAGAGCTTCTCAGCATGGTGCCAAG  
ACCTGTGTGCGCAGTGTACTCTCTTCCAGTGACAGAGAAGTATGAGGCATTCGAAGCAAGAAGAAGAAGAGAAACT  
TAAGGATCAGCGACAGGACGCTCTCGCTGACGTCTACTTCAATTAAGCAAACTATCGGAAACGCTGTGGAACAATAGG  
GTTAATTCACGAGTGGCAACAACAGACACATCTGGACTTTGAGCCTGATTCTGCTCTTAAGAAGTTTCTTGAACA  
AACCTCTAAAATGACCCAGAGGAAAGGGCTGCCTTCTGGAAAAGATGAGAGTATACGTGTACACATGAGTCCGAG  
TGCTCAAGAGGGACAGACTGAGGCTCCAGCTTAGATGAGAAAGTGAATCTGCATTTTATAGCTTTCTGTAATGTGCG  
AGGACAGTTATATGAACTGGATGGCCGGAAGCCTTTCCCTATTCTTACAGAAAAACCTCAGAAGATACCTTCCCTCGA  
GGATGCTGTAGAGTTTGTAAAGATCTTATGGCTCGCGACCCCTCAAGAAGTCCGTTTACCATCATTGCCCTCTCCAA  
AGATTCATACTGAGGAACCTTCTTGTGACCTGAGAAAACAAGAAAAGATTACTGCCAAACATTCTCAAGTGCTGAC  
TTCAATGGAAAATAGATTTCTTTTTCAAAAATCCTGAGCAAGTATGTGTTGGGAAAATCATAAAAATGTCAGGAAATGTC  
ATTTCTAAAGTAAATGTTATACATCACTTGTACGCTTTAGATGAAATGCAAGGGAATGCTGTGCAACTAAAAGTA  
ATTTCTGCTAAGATTAATACTTCCAGTTCGTCACCTGCTGAAACATCTCTAACTATAATACAGATATCAGCTGTACTG  
CATTGACACTGCACTAAAGTGTACATGGCGTGTGTTGGCTTTCAATGCGAAGGAAAATTTAACACATTTTTTTCATGTA  
ACAGAGGGAACCTCCTCACTTCTTTTTTTTTTTTTTTTTTAAATTTTTTTTTTTTAAATTTCTGGGTTTCAGAGATAGATACCGT  
ATGTAGTGATTTGCTTTTGTATCATATGTCTAACACATGGT

>Sequ06759SNP2

AAGGATTTGAACCTATTTCTAAGATCATGTTTACATCCCTGTAGGATTTGTGGACCAAACGCTCCCTTTAGATATGT  
TATAATGGTCTCCAGTGAACCAAACGTAACAAAAGTTGGTGTACTCTTGAACAAAATAAGTGGTTAAACATTTCAAGT  
AGTTGGCTGCTTAAATCTAGCATCCAGTTAGGCAGGATGAACAGCGTCTTTCTTAAACATCACATTTGGTGCCAATGTA  
TCTGCAATGCGCTTCGGGAGGTGGTTGTTCACTGTTGTATTAGCACTTACCCTGACATCTCCTACGTTTTCCGTAATTT  
TACTGTATAACTTGAAGCTTCAACAAAGCTTGGTGTCTGACTGACTGACTGGGGCAAAAAGACGCCAAAAACAT  
TTATAAGGGAGCATTTTCTGAGGGAGAGTAAACGATTTGGACCGAAAAGATGTTGAATCTTCTTCTTTCAACCAGT  
AGCTTTTCCCTTCTCTCTGTTATTCTATGTAAGTTTCACTGATTGTACTGGGCATGAAGATGCAGTAATGTGACTA  
TGCCTGAAACCTGCTCATTCTGAACAGACATAAAGGTGATAGCTGGTGTGTTAAATGACCCGACTCAGTCTTA  
CTAGCCTTAGGGAACAATCACCACATGGGAAAAATGAAGGCTTCACTTATTTGTGCTTTTCTATGATTTGTCATCATA  
CGTTTGATTAATCTCAGTTGAAATGTTTTTGTATCGCTTTCATGTTCTTTTTTTTTTTTAAATTTTATTGAGAATAACA  
TGTTTACTTCTATTACTCGTAACATCTGTCAAACCCCATGCTTTTATGATTTGTGTTGTTACGGTTGGGATCCAGA  
GAAATGCAGCCCTCACACACAATGTTTGTGCACTGTTTTGTAGGTCGGTGGTGTAGATGTTTGCCTGTTATTGATG



TATATTCACTATGAACCATGTTTTAGACATTCCACGTCTCTCTCTGAGCTCCTGCTTTGCTTTTGGACCAATTCCCCT  
TGGCCAAAAAAGAAGAAATAGGGAATAAAATGCTGTTGTCTTCCAAGAAGATTGTGAAAAGTGATTTATGGGTTAA  
AAAAATAAAATGGAGT

>Sequ06770SNP2

GAGTTAGCTTGCGGCTACAGCTGAACTGAAGACAGAAACATGGTGTGCTTGAAAAAGACTCGTTTCTCAGAGACTC  
ACACGGCTCTTCCAGAAGTGCAGGACATCTGGGAGTGTGTGCATCACACTAAAGAAATATGATGGGAGGACCAAGCCA  
GTGCCTAGAAAAGGCCACTCAGAGACATTTGAACCAGCAGACAACAAATGTCTCCTCAGAGCGTCTGATGGCAAGAGG  
AAAATTAGCACAGTGGTTCAGCACCAAGAAGTAATCAAGTTTCAAATGGCGTACTCCAACCTCCTTAGAGCTCACATG  
GATGGACTTAAGAAGAAAGATAAAGAAAAGCAAAAGCAAGAAAACCAAAGCCACCCAATGAGCAACAGACTCTTTAACA  
TATCCATGGTTACCTTAACTGGCCTGTGCGATCAGTGGGGGAAATCGGGAAAGGCCCTCCGCTTGGTTTTGTCGCCCCAC  
CCCACCTTCTCCCCCATTCATCTGAGGCCACAGAATCACTGTTTCATCCATCCGGTGACTGCTACGATATTATGCCATT  
GATTGCATGGTAAACATCTCATCCCTGGCTGTTTCATTGCCACCGGTGATCTGAAGGAGGATTTTTTCAAACCTCATACAA  
GATCAAGCAGGTGAGCTTTATCTCCATAGCTTATGCTTCAGAAACCAGGTCAACAAGCTGCGTGCCTCTGGAGCC  
AAATCCAGACGCCAATGATTAACCTGCCTTTCATACTATTTAATTGTTAGAGTGAGTCCCTATTTATGTTATATTAAC  
AGCTAACCTGTGAGCCCTGTAGCACATTTCAATTGGACTATTTCTTTAGAAGGATGTTAAATTTTCCAGTTATTTGA  
ATTTTCTTCTTTTAAATATAACATTTTTGCTTTGAAATTTAAGCATGGGTGCTCAAAAAATGCAGAAGTAAATATGAC  
CAGGGTGTTTTTATTTTTGTCAAATTTTACAGTATTTGACTTGGCTTGATATTGGAGATGAAATTTGTATGCTATGTTTT  
TATTTTACTTTTTGAAGTACAATGAATATTTCTTGTCCCCCATGTCAAGCTGTCAAACACCAATAAAATGTACAGTAT  
AGCTTCAGTTAATGTGGTGAATTCAAATTTGACATTTTTCTGAATGATGTGATTAAGTTAAATAGCACAAAAAACGT  
ATAAAGTTGTAGATTTACTTTAAATAATTTCTGAGTTATGAATACAGAGACAAAGTATTTGGCTGTAATTTAATCATT  
TCTCTTTATCACAACTACAAGGCAGTTTAGCCAGCTGCCATACCCATTTGTCAGCCATTTTGTGTCATGTCAGCCTC  
CCAAGTCTGATCTCATGGAAAAGGACTGCAGCAGAATTTAAGTTCAGAGATAAAGTGCTTTGTTAAAT

>Sequ06777EST2

GGTTTGGGGATGTAGCTGCAGAAAGCTGTGTGCCACTTCAGCGGGTTGGAGGAGGTGGGGGTGACCTTCTGTCTGG  
TCCCCTGATGGCAGCCACATCCTGGCTTCTACACCGTCTAACCTGTTTCCAGGGTTTGGGAGACCAGGATGTGGACCTGT  
GAGCTTTGGCCATGTGTGAAGGGGCGCTGCCAGTCTGGCTGTTGGAGTCCAGATGGGAGTGCCTGCTTTTCACTGTG  
CAGGGAGAGACGGTCATCTACGCTCTGACCTTCACTGACACACCAGGCATTTCTACAAGCACATCAGCAGGGCCACAG  
GCAGCAGCAGTGGTGGCTGACCTATCAGAGACGACCTTTAACACTCCAGATGGAGACATCATTGTTGGTGGAGAGATC  
CAGTGTTTAGCCTGGGATCCCAGAGGAGAGAGGCTCGCAGTGTCTTAAAGGTGATCCACACGCAGCAGACCGGCCT  
GCAATCATAGCAGTGTTCAAAGACAAGAACCAACCCATTTTTGAGCTTTTGCATGTGGTTTTGTTCAAGGAGAACCT  
GGTGGCGGACCCGAGACTGATGCAGTTCACCCGAATTTCCAGCAGGAGCTCTGCTCACTTTGTGTTGGTCCAATGGA  
AGAATTAACCCATGTGCCTTTCTACTTTGTGAGCAGCTGGCATAACCCATTTTTGGCCTGAGTGGCAGTCCGTTACTGCCT  
TGCCACAGGAAAGGCCCTTCTGCCCTTGCCAATCAGTCGCTCTTTACAGAGTTCATCTCTTGACCGACCATCACACAC  
CCATGAGTCATTTTTGTATACAGATTGTCAATAAATGTGTAGAAAGTTCTTGTATACTAAGACTTGTTCCTTAT  
TTGTCAAACATTTGAACCAATAGAAATCATTGTGAGGTCAAGATGAAATGTAGAGTTCATGCTCCAGGGCTGAAGTA  
TTTGCACTTAAAGTTAAAGAGTACTCTGCTGATTTAACTTTTGTACTTTTACAACATTTGTCGGACTCTCAATGGACA  
GTTTTTTAAAAAGAAATCAATCACTACAATCACTGCATCAGAGCTGAAATATTCGACATTTATGTTGTGTGCACACT  
AGAAAAGTGACAAAATAAAGTATACTATAAAGTATTTTTTTTTGATTTGTGCTGCTAATGTTTGGAGAAATGACAATA  
AATCTGAGCAAAATGATGCGTCTGCTCCTTTCCATGATAAG

>Sequ06799SNP2

TGTTGTTTGTAAATACTGATGACACTTGATCTGATTGGTCCAGTGTGATACTCAACCAGGAAGTGACAAAAGGTCA  
AAGTTCAACAATGAGCCATAAACATCAACGTAACCTCAGATCCAACTGATCTGACTCACGACGCTGCGTTCAGCTCCA  
GTCACTGTTGAATATGTTGAGTCGCAGCATCAGATCGTCTGATTCAAGGGACTG

>Sequ06811SNP2

ATAACTTTGTGGCGTCTCTGACCCAGAATTGGTGTGAGAAATTTCTGTATAAAACATTTTTACTGTGGTGATATG  
AATTACTGGGATTAAGTCAATGAAATTTCTAGTTTGGGAGGACTGTATATGCTTCAAAATTCACTATAAGCAGGGCAAC  
ATTAGAAAACGTATGAATCATGAGTTTTATTTCATTGCTTGTGAAGCACTGACTCTCATCAAAATAAAGGGTATTATTA  
CAACACTGCTTCAT

>Sequ06823EST2

GAGAGGATGGATGAAGAGTTTACCAAGATCATGCAGAACACTGATCCCCACTCACAAGAAATATGTTGACAATCTGAAG  
GATGAGGGACGGGTTTTCGGCATCATTGACCGGCTGCTGGACTACTTGGAGAACAAGGGCAGCAGAGGAGATTTGC  
CGTATCTATCTGCGTAGGATCATGCACACCTACTACAAGTTTACTACAAGGCCACCAGCCAGCTGGGCACTCCAG  
GGAGAGACCAAGTCCGAGCAGGACCAGGAGGAGAGCGAGGGGGAGGACAGCGCTGTGATCATGGACCGTCTCTGCAAG  
TTCATCTACGCCAAGGATCGCACCGACCGTATCCGTACCTGCGCTATCCTCTGCCACATTTACCACCACGCTCTGCAT  
TCACGCTGGTACCAGGCCCGGACCTGATGCTGATGAGCCACCTGCAGGACAATATCCAGCAGCTGACCCACCTGTA  
CAGATCCTTTACAACAGAACCATGGTCCAACCTGGGCATCTGCGCTTTTAGGCAGGGCATGATTAAGATGCCACAAT  
GCCCTGCTGGATATCCAGTCTCTGGCCGCGCAAGGAGCTGCTGGGTGAGGTTCTGCTCATGAGGAACATGCAGGAG  
AGGAACCGCCGAGCAGGAAAAAATTGAAAAGAGAAGACAAGTGCATTTCCATATGCACATCAACCTGGAGCTGCTGGAG  
TGTGTGTAACCTGGTGTGTCAGCCATGCTGCTGGAAATCCCCTACATGGCCGCCATGAGTTTGTGATGCCGCGCCAGGATG  
ATCAGCAAGCAGTTCATCACCAGCTGAGGGTGGGAGAGAGACAGCCACTGCTGGGACCCCAAGAGAGCATGAGGGAG  
CATGTGGTGGCCGCCAGCAAGGCCATGAAGATGGGAGACTGGCGTACCTGCCACTCATTTCATCATCAATGAGAAGATG  
AACAGTAAGGTGTGGACCTGTTTCTGAGACGCAGAGAGTACGCGAGATGCTTGTGAGGAAGATCCAAGAGGAGTCT  
CTGAGGACTTATCTGTTACAGTACAGCAGTGTGTACGACTCCATCAGCATGGAGACACTATCTGAGATGTTTGTGATTG  
GAGATAACCCACAGTTCACAGCATCATCAGCAAAATGATCATCAACGAGGAGCTGATGGCATCACTTGACCAGCCACA  
CAGACTGTTGTGATGCACCGCACAGAGCCATCCCTGCGAAGCATGGCTCTGCAGCTCGCTGAGAAACTGGGCGGC

TTGGTGGAGAACAACGAGCGCGTCTTCGACCTCAAACAGGGTGTCTACGGAGGCTACTTCAACAGAGATCAAAAAGGT  
GGCTACCAACAGAAACAGTCTTACCAGAGAGATCAGAAAGGTGGATACCAGCAGAAACAGGGGGGCTACCAGCGGGG  
GGCTACAGAAATCAAAACCAAAGCACTACTGAGCTTGCAACGTGTGGATTTTCACTCTTGCCACCTGAATTAGTCTTC  
ATTCCATAACAACACCACCTGGGTTTCTGTGCTTGGCACTTGGCTGTGTGCTGTTCTCCCTCATTGACTCAAAACT  
GATCCAGAAATAGCTGAAAAGTCATTGCAGCACAAGCCTTTCTCACTGCAACTGCACGGGGTGATATTCCAGTACATGA  
AGAGTTTTAAGGTTATTGATAATAGAACATTGTACAAAAGGGCATTGCAGTGTGGCTAGCTTGTGGCAGTGCAGTCA  
GACGATAGACGCTTCAAGTATTGTTGACTTATACTTAACAATAAACAATAA

>Sequ06852SNP2

ATCAACATAAAAATAATAGCATTAAATTTCTGTCAATCATGAAAATCTGCAGATAAAAAATGTAACCTGACCTTGTAAAT  
CCAAACTCAGTTTTTTTACCAGTAGATGCATCTCTACCGTTTTACAATATATTTTCAGGGAAAAACAATACTTGGAGCCAGT  
TTGATAGGAAGTTTACCTGATCTGTTTAAATCATGAAACCATAGATGGGCTTACTGCCCTCCAGCACCAACATGTCTA  
TAAGCAGTTTTAACT

>Sequ06859EST2

ACCGGTGTCCACGACTACGGCGACACCGTGGCCCTGGAGCTGCTCTATAGGAGTGACCAAAATCGCACAGGTCACCT  
GACCTTTAACAGCCTGTGTCTTTCCAACGGAGGCATATTTCCAGAAACACACTACCCACGGCTGCTGCAGACGCTTCT  
GAAGGACTCCAGTTTTCTGGCTCCGCTCCTGACTCGTCTCACCACATATATGATCTTCCAAAAGGGGGATCGGGGAAG  
TGTTCCGGTCCATACAGCAGCCCACAGACGCTGAGTTCTGGGACATGTGGACGGGTTTGCCTACAATGATGGCAACC  
TAGTTTTGGACAGTATTCTCCAGTACATCAACCAGAGATGAAACACAGAGAGCGGTGGGTGGGTGCGCTCACTTCCA  
CCTTCGTCACACTGCACATGATCTACGGACCCCTGGACCCGGTCAACCCCATCCTCAGTTTATCCGCGTTTACCAGC  
AGCTGGTCCAGAGTTCGACAGTCAACATTTTGGATGAACACATCAGTCACTACCCCTCAGCTGGAGGATCCCACTGGT  
TCCTCAATGCATATTTCAATTTTTATTCACTCTTTCTGACGGGAAATGCAACGGCCATGTTCAAGAATGATGCTAAAAC  
CTGTTCAAGCGAGTGTACCAAAGTGATAAATGATCACATGTGGTGGATAACACTCTCCTGATGATTGTAACCAGGAGA  
AACGCTGCTTTAACTGAGATTTAATCACAACTGATGGGTTACTTTACCAGCATTAATCTCTGAGATGTCAGGTCCCA  
TCACAGACATAAAATC

>Sequ06880SNP2

GCTGCAGACTCGGGGAAGGAGGTGGGCGTGACCACAGGCAGGAAGAGACGATGTGGTTGGCTGGACCTGGTGTCTCAT  
CAAATATGCACACATGATCAACGGCTTCACCGCTTTAGCGCTCACCAAACCTTGACATACTTGACGTGTTCCAGAGAT  
CAGAGTGGGCGTAGGCTACAAAGTCGACAACCAAACCTATACCTCACTTCCAGCCAATCAGGAGGTACTGCAGCGTGT  
TGAGGTCCAGTATGAGACGCTGCCCGGCTGGAAAAGCGACACCTCGGCTGCTAGAAGCTTCGCGGAGCTGCCTGAGAA  
CGCGCAGAAATATGTCCGCTTCAATTGAGGAGCAGCTGGGAGTGCCGTGCAAAATGGATCGGAGTGGGCAAGTCTCGGGA  
GTCCATGATCCAGCTGTTCTAGACGGAAGGGAGGAGACACAGGCAAAAGAAGATGCACAGCA GCGAAATCAACGGCA  
CCCTTCTCCCCCTCAGCCCCACACACAGCCTACCTACCTGTCTCAGCTCTCCGACAGAGACGCGACCATCATGTCTGT  
TCTTAACGCTTTACACCAGTGTGTATCAGACTGTCCCATGTTACAGACCAGACCGTCTGGATCGGACTCCCATCAG  
ACTGACCTCCCGTGCGAGTGGTTCOAACGCTCTCCATCTGGATTTTTTAAAGTTTTAAACTTTTAGGATAACAGCTCC  
ACAGTCAAGTCCCTCTTTAGTTTTGTCCCTGTTTTGTATCGTAGCCGTTTTATTTTCAGACATACAACTCACCAATCGGCAA  
CACCAGTGCCTCAGGCTGAGAGAGGACATGAGGAAATGGACTCGACACACGCAGACGCAGACAGGGGATCACTGC  
CCGGAGGAACGTCCACAGATGTTTTGGTCCGCTCAAACCTTTGTTCAAGTGTATTTTTGTTAATCTATGCTGTGTTTTAAA  
TGCGCTGTGCCAGTCCGGTGTAAACCAGTAAATAAGTTAAAATAAGTTTTTAACTCGGCCTTAAGATGCTTTGGACT  
ATTATCTGCTTTATGTTTTATTCTGCCAAGTCAACAACACATCCTGACTTGATAAAGGGATCCTTTAATATTTTTAAA  
AGTGTCTTTTTGTGTTTTGTTTTCTGTCATCAGACAAATGTGAGAGACTTCTTATATTGCCAAAAAATTAGCTTTGAAA  
TTTCTTGTAGCTATAGCGATCGCTTCCAGGGAGCGCTGTTGATGAAATGTTGACGTACATCTTCCCGTACTGCGAAAA  
GGAAAGGCTCCTTTCTCACTTTAACTTTAGCAGGTGAGTTTTTTCATGAACCAGAAAAATAACTATCACTTTTTTCAA  
ATGAAAATCAAATCATCAGGCCAGCATCTGTGATTTG

>Sequ06881EST2

GTTGTGCGTCCATCAGCGTGTGTTCCAAGGAGATTTTACCTGCAGAGTTATTCGAAAAATGGCGAGCCTGTGTGCCA  
GAGCAGTGAGACAGAGCTACTCACTAGTAGCTTCACTGTACTTACACGAACATCTCCACGATTGTTATGTACGGCCA  
CTCAGCAGAAGAAATGGCCACAGGTCAGAGGAGGACGCTGAGAAGCCAGAGCAGAGTGCAGCAGAGAAAGTCTGACGG  
AGGAGAAGACCCAGCTGGAGGAGCAGCTCAAGGAGATGACGGAAAAGTACAAGCGAGCCTTGGCTGACACAGAGAAC  
TCAGAACCGGGAGTCAAGAGATGATAGAAGATGCTAAATTTACGGGATCCAGGGCTTCTGTAAGACCTGCTGGAAG  
TGGCCGACATCCTGGAGAAAGCTACTGAGAGCGTGCCCAAGGAGGAGGTGACAACCAAGAACCCTCACCTGAAGAACC  
TGTACGACGGCTTGGTATGACTGAGGTCCAGATCCAGAAGGTGTTACCACAGCACGGCCTGGTCAAGCTGAACCCCG  
ACGGCCAGAAGTTCGACCCCTACGAGCACGAGGCCCTTCCACGCCCCGTGGAAGGCAAGGAGCCCGGCACTGTCTG  
CCGTAGTAACCAAAGTGGGCTACAAGATTTACCGTCCGACCTCAGGCCAGCGCTGGTGGGTGTGGCCAAAGCCCCCT  
AGAAATGATGACAACTGTGACAAAATGGGATTTGTTTTGTTGCTTGGTGGACGGGGGACCTCAGTTACAGTAGACTG  
GTCCAGCACCCCTGCCACCCTTTTTCCCATGGGTCACTCCCCCTCCTGCCTCGAAGAGACGTGAACCCAGCTGAAAT  
GAACTTTGTATCCGGACAATATTCATCTGTTCCCTAACAGATGCATAACACTCTGTCTGGCACAGGACAGTCTTTGCAG  
TAAAAATTAATTTAGTCATTACATAAGTCATTTTCAGGCAGTTATCGTCAGATGTTTAAAAAAGAAACAGCACCAGCTC  
ACAGACGGAGGCTTTCATGTCTCCTCATGCTGCCATAAATTTAACTGGAAGAGAAAGCAGTGGAAATATATTTCACTGA  
CTTATATTAATAAAAAAGTTTACCATCCGATCATAACCCTTCTAATTTCAATACTTTTGGATGAGAGCTGGTGTAAAA  
TCCATCCACAGGTGAACAGTACTCTGAACTGCTGATATCATTTCCGGACTTTTGTGAAAGCTCTAATAATGTTGAA  
ATTGACTCTTCAGTT

>Sequ06882EST2

GAACCGGACCGAGAAATGCCGCTACTACAGTCTCAGGGCCACATACTGGTCTTGGCTGGCTTCCGGAACTGCGGG  
GTCAGATGGAGGCTTGGGACGTTGAAGAAATACAAACAGGTGTCCAACCTCAGGCTCCAGATGCCACACATTTCTGCT  
GGTCTCTGACGGTGACACGTCATCACGGCAACCTGTTCTCCCGGCTGCGGGTCAGTAATGGTTATAAGATCTGGC

ACTACACTGGCTCGGTTCTGCACAAATGGGAAGTGGCGGCCGGTTCGGAGCTGTGGGAGGTTCACTGGCAGCCGTTCC  
CCGACGGCAGCTTCCCCGAGCGTGCCATCAAGTACCAGGCAGCACCCAGCGAGCTGGGGAGCAGCAGGCCCCACCCA  
CTCAGGCATACCCGCCACCTGCACCTGAGACATCTGCCGGCCACGCCAGCCAAACTGCATGAGGAGGAGCCCCCTC  
AGAAGCATGCGTCCAGTCTTTCGGGGGAGAAGAGTCTTTCTAAAGCAGCTCTGAAGAATCAGAGAAACGAGAAGCTA  
AGAAGGCAGCTAAACAGGAATCAAAGTCTGAACATGAGCCTCCGTCTGACCCCGCCCCGTACCAACAGCCAATCAG  
AACCAACCAGCGGTGACCCGGAGATGGACAAGAAGATAAAGAATTTAAAGAAGAAACTTAAAGCCATTGAGGAGCTGA  
AGGAGCAACAAGCATCTGGAAAAGTCTGCAGAAGAACCAGCTGGAGAAGATCCAGAAGGAGGACCAGCTGCTAAAGG  
AGCTGGAGGAGCTGCAGATCGGATAGTAGGGGTGCTGCTGGAGCTACAGTCTGCAACTCCAAATCCTACAATCCATC  
ACTCATGCACAAAACAGAGGAGGGGTGAGTGCCTGTGTTTCACTGAAGCTGCATCTGTTGCTTTAGTGTGAAATGT  
TTTCTGTTTCCCTTACCTGACACCCGAGGACAGGTGAGGAGGGGGCATGGAGTTCTGATACATTTCTATTTGGATCAG  
CCTGTGATCAATTCATTCTCTGAGACTTCTGCAGAGGAACCTCGGAAATGTAGTTGAACAGTTTGTACCAAAATAAC  
TGCTGTGTGTGTGTGTG

>Sequ06907SNP2

AAACCATGTGACGTTCTTTATNTCGGGTCACATTCTAAGTGGATAAGAGCGGTGTGATGTAACCTTACTGTGCCAACT  
TCACATTTCCATGCATTAGGAAATGAAAATGTGCTGAACGGAAAGTGCACCTGACTGACACAGGAGAGCAAACCTCCAG  
TGGTTTTGTAAATAATGACTGACCGTAATGTTGGTTATTCAACAGTAGCTGTTGTGCGACCTTTAGGACCAGGAAGCG  
TTCTCATTTTTCTAAAATCTGCACCACTGACTCTTCAGTTATCCATCATCACTGTTAACTGTTGGTCCATTTTTAGTG  
TTGAAATAAATGGCAACACTTTATTTTACAGTTTTGTAATTTCCCTAATAATCTACAAGAAAGATTACAAGAAGTAGAG  
TTTGTAAATTTGTACTATTTATAGGTAAATGAAGAGTTTGAAGCAGTTTCTTTAAAAGAATTGATCCATTTAAACC  
AAAACATAGTGATTTTCACTTCTGGAAACTGTATTCTACATTTTGCATGTTTCTGACCTTCTGAGCTCTTACAC  
AGGATTATCAAGGTTATATTAGCACTTAATTTGGAGGTGAAATGAACAATTTAAATTTGATACAAAATGTTAGTCAATTC  
TAGGAACCTTCTATGAATATTATTTAATTTCTTGGATATTAAGGAGAATATTTGACCCATACAGTAAGGTGTTTCC  
AGATAATTCATGTAGCTTTACAGTTGACTTAAATTAACATGAACTGATTGTAACAGTCTTTGACAAATTGATCCAAC  
TACCTTTTAAATAAGATTAAGATCTTATGATGTTTTTGTGCAATTTCTTGTGTACGTCTTGTGTGATCTGA  
AGGTGTGATTGTTGTTGTTGTTACTGATAAAGAAATGTTTGTTTTTTTGACTTGAATTAACGTGGAATAAATAAG  
TTAATTTG

>Sequ06943EST2

TAGGGTAGGTTCCGTTTTTTTTTTTTTTAGAGTTGGTTATAACGTTTTATTTAAAATGAACA TACATAAGCATAACCAA  
AGTGTTTTTAACAGTAGGTTTGTCTCCAGACATGAAAGTATACAATATACATTAGATATTGCTACAGGTAAATGGAAA  
ATGAACAATATTTGGGTTGAAACTAGTTCTATGCGTGAGTTGAGTACAGTATAGGGAAGGAAACAAGGAAACTGGAT  
CCTGTCAGTGCATTTCCCGCCTTTGCTGAATGACCAAAGTAAATAATTTAACAATTTGAAGTTATCAGTATAACATA  
GCTATGAAATCCAAAACCACATAACATGCTTTCTCAAACCTACATCAATTTGAAAAATCACACTAATTTTACTCCAGAAAA  
CAAAATCTAATCTAATGCTTAAAATGTAAATATTAGGATAAATCAGAACTTGTGCAAAAAACAATCCTACATCGAAAT  
TTTCAAAACAACGGGTGAACCGAATAAAAAAATAATCAACTCTAAACGACAACCACACGCCATCGGCGTGGGAACATA  
AAAGGGATCAC TGTGTTTTATTCTTCATGTTAATGTGTCCTAGTTGAACGGCAACAATCGCTGCTCGTTATTATCA  
GGTTTTCTGGGAAGTGACCTTCTACCTGTTTGGGTTTTTGGAGTCTTCAATTATGATTAGGGGTGTCTCTGTCCGTAT  
CTTGCCATGGTTGGGTTTACGGCAGACGCCCCGTAACGTAATTTGAGTTTGTAGTTCAAATCCTGGCTGGGAGGTA  
ATTTGTGGCAGGGGATGGGTGTTGACTTTCCATTGTACAGTCTCATCTAGTAGCCGCCCGCTAGCCCCCTTGG  
GTAGCCACCACCGCCCGCCTCTGGTGTATGGGGCAGCGCTCCTTTGACCGCCGAAGGGCCCTTTTATGGGGCCATA  
ACCAGACGAATGCTGGCCATAGCCGCTGCCAAACTCGTTGTAACCGTTTTCCACCACCATACCCACTTCCCTGGTCTCC  
GTAGCCGCCCCATATAGCCCGCCGTACCCCTCCGTAGCCGCCACAGTTGTAGCTCCGCCATTTCCGTAGTTGTAGTT  
TCCCGCGTAGTCCCTGCCGCGTAGCCATTTTGATTTCCCTCATGCCCTACCTGGTCTACCCCGAGGCGCCATAGC  
GCTTCTGTTGGCCGCTGCATCTCTGCTGGTCAGGGCTTTCTAACCTCAACCTTGTGTCCATTGACAGTGTGAAA  
TTTCAACAGCACCGCTTGTGTCAGCTGCGTGGTGGTCAAATACACAAGCCGAAACCCCTTTCTTTCCGGTCTC  
CTTCTCCGAGATGACTTCGGCCTTCTCGATCTGACCGTACTGGGAGAAGTATTCGGTCCAGATGTTTCTTCAATGTC  
GTCCTTTCAGGCCGCCGACAAAATATTTTCTTAACCTTTGCGAGTGCCTCTGGCTGTTAGCGTCTTCTCTCGCCACGGC  
CCGCTTACCTCGACAGCATTGCCGTCGACAGTGTGCGGCCCTAGCCGCCATTGCTGCATCGGCCTCCTCTGGTGTGGA  
GTAAGTTACAAAGCCGAAACAGCGGGACCGCTGCAACTGCTTGTTCACGACGACAACCGCAGTCCGTAAGCGTACCGTA  
CTGCTCGAAATGCTTGGCAGGCCATCGTCTGTCGGTGTCCACATTCAGTCCACCACGAAAAGTTTGAAGAGCTGGTC  
GGTCATTTTTGAACAACAGGGAGATGATAATTTCTCAACAAGTCAGTCTGTTAATCTCAAAATGGTC

>Sequ06953EST2

TGCCCTCCGTTGTTCAATCAACATGGCGGGCGGACCAATTTAGAAAAGAAACCAAGACGCCACTGTGTATGTCGGCGG  
CTTGATGAGAAAGTGTGAGAGCCGTTACTATGGGAGCTTTTCTGACGGCTGGTCTGTAGTCAACACTCACATGCC  
CAAAGACAGGGTCACTGGACAACATCAGGGCTATGGTTTTGTGGAGTTTCTCAGCGAAGAGGACGCTGACTATGCCAT  
CAAAATCATGAATATGATAAAGCTCTATGGCAAACCAATTCGAGTTAATAAGGCATCAGCGCACAAACAAAACCTTGA  
TGTGGGTGCAACATCTTCATTGGTAACTGGACCCGAAATTTGATGAGAAACTGCTCTATGACACATTCAGTGCCTT  
TGGCGTGATCCTCCAGACGCCAAAGATCATGCGAGACCCAGACACTGGCAACTCCAAGGGTTATGCTTTTCAATTT  
CGCCAGCTTTGACGCGTCAGATGCCGCCATTGAGGCCATGAATGGCCAGTACCTGTGCAACAGGCCCATCACGGTGT  
GTATGCCCTTCAAGAAGGATTTCAAAGGAGAACGACACGGCTCAGTGCAGAGCGACTCCTGGCGGCACAAAACCTCT  
ACTCCAGGCAGACAGACTCATCAGCTGTTTGCAGACGCTCCCCACCACCATCTGCTCCGACACCCAGTCTTGACCA  
CGCTGGGAACCTGGGATGCCCATGCCAGGCATGCCCTCCTGGTGTCTTTCCCTCCTGTTCCTC CGGGATCGATGC  
CTCCAACAATCGCCCCCTAGCATGGCCATGCCTCCAAATGCAGGGAATCCAGGCCACAGGGTGGGGCGGAGGACCTC  
CACCCGGACCACCACCTTCCCTCCTGCCAACATGCATCCAGGTATGCCTCAGATGCCCATGCCCCCTCCTGCTCCTC  
CTGGCATGGTACTCCAACCTCCTGCTCCTCCAGGATCAATCAACCACGGGACCGCCACCGCCTGGCATGCCTCCA  
CCCCACCCATGGGCATGCCACCCAGAGCACCATATGGACCTCCATGGGTCCACCTGTGCCTCCAGGTATGAGAGGG  
CCACCTCCACCATGCCTCCACCTGGCTACGGTGTGGTCTCCTCCTGTCACCTCCTTTTGGCTTCCAGAGAGGACCC  
CCAATGCCACCAAGGCCCTGGTGGTGCACCACCGCTCCCAATGAGAGCACAATGCCACCGTAATCCATCTCAGAC

TGTAGAAACAGGCTCGCATTTAGATTTTTCTTTTTACTACTACAATATGTAATTGTGAGAATAATTTAACCTGTTTTAT  
TTGTTTTGTTTTTTTTTGGTTCTATTGTACAGTTGAAGGACC

>Sequ06979EST2

GGATAAATTTTGGAGGTCATCAAGCCATTCTGTGCAGTCTGCCAGAAATTCAGAAACCAGAAAGAAATTTGTTTTGGAA  
TGATCATCACCATTGGACAGGCCATTGTATATGTAATGACTGGCATGTATGGAGACCCCTCAGAGATGGGTGCTGGGA  
TATGCTTGCTCATCATCCAGCTCTTTGTTGCAGGTCTGATTGTCTTGCTGCTGGATGAGCTCCTCCAGAAGGGCT  
ATGGTCTGGGCTCAGGTATCTCCCTCTTCATTGCAACCAACATCTGTGAGACGATTGTCTGGAAGGCTTTTCAGCCCCA  
CCACCGTCAACACTGGCAGAGGTACTGAGTTTGGAGGAGCCATCATTGCTCTCTCCATCTCCTGGCTACCCGCACTG  
ACAAGGTGCGTGCCCTGAGAGAAGCCTTCTACAGACAAAACCTGCCAACCTCATGAACCTCATCGCCACCGTCTTTG  
TGTTTTGCAGTGGTCATATACTTCCAGGGCTTCAGAGTGGATCTGCCCATCAAATCAGCACGTTATCGTGGCCAATACA  
ACACTTACCCCATCAAATATTCTACACCTCCAACATCCCCATCATCTGCAGTCTGCCCTGGTCTCCAATCTCTACG  
TAATTTACAGATGTGTGCGACACGTTTTCAGTGGCAACTTCTGGTCAACCTTCTGGGAACCTGGTCTGACACTTCGA  
GTGGAGGACCAGCTCGGGCCTACCCAGTGGGCGGTCTGTGCTACTACCTTTCGCCTCCAGAGTCATTTGGTTCTGTTT  
TAGATGACCCAGTTCACGCTGTCAATTTATATTGTCTTCATGCTCGGCTCCTGTGCCCTCTCTCCAAGACCTGGATTG  
AGGTGCTGGATCCTCTGCCAAAAGATGTTGCAAAGCAGCTGAAGGAGCAGCAGATGGTGATGAGAGGGCACAGAGAGA  
CCTCTATGGTGCATGAGCTTAAACAGGTACATCCCCACAGCTGCTGCCCTTGGTGGTCTGTGTATAGGAGGGCTGTCTG  
TCATGGCTGACTTCTTGGGTGCCATTGGCTCGGGCACAGGGATCCTCTTGGCTGTGACCATCATCTACCAGTACTTTG  
AGATCTTTGTGAAGGAGCAGAGTGAAGTGGGCAGCATGGGAGCAGTGCCTTCTAGAAAATACCAACCTTCTGACGCA  
AACCAGACACAGTTCATCCACCCCTCCCATCTTTTTTATTTGCATTTTTCAGTTCGCACAATCAGTACATTTTCCAG  
CTGGGATAGGTAATTTCTCTGCCACCTTTGTTCCCAACCATATTTCTTAGCATGTCAATGCTGAGAAAACCTGTTTTG  
GGTTACTGCCAGGTTGAGCATAGTATCAGTCTTTTTTATCCAAGAGCTACTACCCACTCTCTGACGGCTGCCTAAAT  
CCCCACTGACTGTCTCTTCAGCTGAAAAATGCCTATAAACACACAAGTGTGAGGTGTTGTCTCTGACTTACCTCAGGC  
ATTGTTCAATTGCAGCATGTACAAGGAACACTAGACACTTCAGACAGTGACAACATGTAAGTGCTTATTTCAAGCTGAA  
GGCACTGTGCCGGACTTTGCAGGGGGAGTTGAAAGAAAGCCATGTCAATGTTCAACATAACAGTCGTGCTTGAGGT  
TTCTAGGGCACTATAGTAGGATGTGAAAAGTATAAATAAAGTATGCTTACACTCCTAATAATGTTTTCTGGTAAACTCT  
GACAACCTGTTGGTGGTTTTCAATTTATCTTTATTTTGATATTTAAATGATGGACTATGTCTATATTTACTCTGGTCT  
TATGTAGGGCACAGTGTGTTGCTCTGTCTCTGATTCCTCAGAGGAAAGTGTGTTGTGTGTGCTGTTGTGCTCTTTTAT  
TCCCAGACTGAATCGCTGCACAATACTGCCGAGGTGGTGGGATGAGGGTGGGTTTTGATAGGGATGAAAAAGGGTTTT  
CATTTTGGTTTTACTTTATGTAACAGACATAATTGTGTTATTAACAAAAACAGGATCTTTTTT

>Sequ06980EST2

GGGGCGTCGGAGCGGGACGGGTGAGTAATGCCTAGGAAATTCGCTTGATGTGGGGGATAACCATTGGAAACGATGG  
CTAATACCGCATAAATGCCTACGGGCCAAAAGAGGGGGAAATTTTCATGTTCCCTCCCGCGGGTGGTGTGCTGAGCCTG  
AGAAGACTTGGTTTTATTTAACCAGCGCGCCAAGAAAGATTTTCCTCAGGTTACCTCGTGGTTCAGATCAGCCACCTCT  
AAAACATCAAGCAGCCCTGCCTTAAACTCCACCTGCCAGCTCTTTACTGTAACCAAGCAAACCTAAAGCCTTCAGAAT  
GATGCAGATCAGCAGCGACTCCGCCAGCAACAAGCACTCCCTCATCAACGTCATGCACCGCTTCATAGCAGCTGCCAA  
CAATATGGACGAGACCATCATGGTGGCCAGTCTGCTGCGAGACGCTGCCGCTGGAGGAGCAGGCGGCCAGGTCAGG  
GGCCAACAATAACAATGAACCGCCGTGTCCCAACAAGCAGAGGGATATGTATGAGCACTACCTGCTCCTCAAATCCAT  
AAAGAATGACATGGAGTGGGGTCTGCTGAAGAGGGAGATGAGCAGCGCGCCAGCTTCTGGAGATGGCGGTGAAGCA  
GGAGGAACAGCAGCCGGTACCAGGGGATCTGCTCCCGGACGACAACCTGGACCTGGAGCATCAGTTTCAATATCACCT  
CAGAGGACTGTTTGGAGTCTGTCCAAGCTCACAATGCAAGCAGACCACCTACCAACAGATAACAAGAGAGAAATAGG  
AGGAGGAAACTTCATGAGATAGAAGTCTCTACTGTCCCCCTCCCTCCCAACCTGACTGCTTGACCTCCAACAATGGG  
ATGTGTTGAAGGGGCCCCCATCTCTTCTTAATAGATCTCAATGGACAGTGAACCTGACCAGGGCAACCACTTTGTGA  
CTTCTCACTCCTGTGTAGCGACACTCCAACCTCCCTCTTCTCCCAACAAAACATACCTGAAACCAAGTACGCGCTG  
CACATGTCTACCTGCAGCTGCTGCTGAGTGCAGTGGTTTTGACATTTTCGTGCTTGGTGGAGTTAATTGATTCTGTTCC  
CAAGTCCAATGAAGCACAGCTCTGGTTTTATGCAGAACTTTCCACCCCTTTTTGTTTTCAATTTCAAAATTTGAACGTG  
AATTTGTCATCAGATCGATGTCTGATTGTGAATAAAAGGTTTACTGTAGGAGATATTGAATGCTGGTTATTCTGTCC  
CTCCTTTTTTAAACATGAAATGATTTTAAATGCTGAGCTGAAGGGCTTTAACCACAGAGGTTTCAAATCTTTCCACT  
TGGTGTACTGTAACATGGTGTGCCCTTGAATTTTTGTATACCCTCTTGGCCCTGTTGAGTTAACTCCCTCATTGTCTGT  
CTGCTTAAATGGTTTATCAGCGTATTTATGATGAAATGGCTCATTTGTTTGTCTTGGATATTTCAAACCAATTTTA  
TATTGACGCAGAAATGCAGTAAAAGTGAATAAATAATTGGAACCTTAAATTTTGGACTTTGTTTTCTTTTGTCACTGT  
CAACAGGAAGGATCTTAAAG

>Sequ06997EST2

ACTATAGGAGGTCGTTTTTTTTTTAGGGTTAATCACGAATTTATTCCAGAAAAGTTAACATATCCAGGACAAAAACA  
TTTCTATCCCTATGAAAAATACATTAATGTGAGAAATAATGTAACACATGGCTCATTGGAGAGTTTGGACATTT  
TAGTACTAAAACATAATTCAAAAGTACAAATAAAAAAAACAAAAAACAAAAACACATGCAACAGTTTTCAAAGTTCA  
AAAGTAACGCTCACTACCTGAACTTCAAATAACAGTGAATGAAAATGGAAAAAATAGATGTGATTCAAATCTGC  
GTTGCTTATTAGTCCATAGTCTCCAGGCCAGGAAGGCTCTGGGGAAGCCACCTGACCTCCTCCGGTTCATGTTGT  
TGTTTTCCCGGCCCGGCATCATTGAAGCATTCTCAGCAGCCATGCCAGAAGCACCAGCAGGACCAGAATTACCACCCA  
GAGAGTTCCTGTTTATGGGCATCCATGGCCGGCTTATGCATCTTATGCTTGTCTCCCTATTTTCAGAGAAGTTGC  
CTCTGAAGCTTCCCTGCTGCCCTTTATCATCTTCTGTTGCGCATGCTCATCTCCTCTCTCCTCCGCGCTTCT  
CCTCCTGTCGGAGCTCAGCTGTTTCTCTCTTCTGACCTCCTGACTGTGGAGCTCCTCCATCCTCCGAGCTCCTCCT  
GCCGCTCAGCAGGTCCGGCTCATCAGCATCACCTGATGCTGCTGCTGGCCGCTCCATCTCGGCCTCCAGCTTCT  
CCTGAGCCTCTTTTATGTTGCGGTCCACCATTTTCGTAAGTCTGCTGCTTCTCCATCTCCATCAGGGCTTTCCAGCGCATGG  
CATACTCATACTCAAAGGAGCCTGGCTGAGCAAATCGAGGTGGCTGCTCACGCTCTTTGTGATATTGCTGGTTTTTGT  
TTATGATCTTTTCTGACAGTCCCTCCTCTTCATCCATCCGATCCATAGGTTCCACTGTAACAGGGGCGAGGAAAAGCTG  
TGAGAAGATAAGCACCATCACTGCACCTATCCAGAGCTTTTCTTGCAGCTGGCTTTGAGGTGACTCCACTATTCTCT  
TCCCTGTAGGCCTCCTCTGTGCATCCTATGACCACAGCTCTTCTATCTGACCAACACAGGAAAGGCTCCTCCA

GCAGCTCGTTGGACACAAACTCTGGCAAATTCCTTACAGATAAAGCAGCGCCGTGTGTTGCAAACCTCACCCGTATGG  
GTCTGCCTCTGAACAGAGTATCATCCAACCTCGGCTCTGGCAATCTCTGCTATGATCCTGGTCTCCAGCCGGATGAAGC  
CGAAGCCCTTTTCCTTGTGTTGACAAAAGATCTCACTGGCCTTCCCGTACTTGGAGAACAGCTTCTCGATTTCTCTCCGG  
TTACTCCAGTTGGAGGTTTCTTACAAAACAGCCTGCTTCCGCTGTGTGAAGGTTCTTCTCCCGGGTTTCTGAAGCTGT  
GCAGGTCTAGGGTTAAGGCCTCATTGATGTTGGTATGCTCGCTCGGCTCAGGTTGCTGGCCGTTGGTGTGTTGTTCTC  
CGGGTTTTTTTCTGGTACCCGGGCGGTTGAGGCCGTGGTCTGCTGGGGCCCTTTGTTTCCCTGCATTTTTTGGCAAC  
AGAATTCAAACCCGAGTCGATGAACCGCTCAATAAAAGACGCAAACCTTAGCAGACAGTGGCGCACAAAGAGCTGCG  
AAAATGGCGAGGCTGCGTGCTGCCGCGACGCTAT

>Sequ07002EST2

CAGTTTCAAAGATGGCTCTTGCTAGTGTGTTGAACAGTGATTGTGCGGATTTTTCTTTTGGTAATTGTCAGCCTTTTTG  
CGTCTGGTTCTGGACCCGGACATAGCGGTCTGGGTTTTGAGGCTACTCCCGGAGACAGCCTCAGTTTTTCCGTTAAAA  
ACCCGCTGTCTGCCGGGACGATGATGGCGTCGAGAGGAAAATAGAGTTTCTGCATGGGACCACCACCTTAGCATTCA  
AATTCAGCATGGTGTATTGTTGCTGTGGACTCTCGAGCCACGGCGGGCTCTTACATCGCATCTCAAACAGTGAAGA  
AGGTGATTGAGATCAACCCCTACCTGCTGGGTACCATGGCTGGAGGAGCTGCAGACTGTAGCTTCTGGGAACGTCTGC  
TGGCCCGCAGTGGCGCATCTACGAGCTGCGCAACAAGGAGCGTATCTCAGTGGCAGCAGCCTCCAAGCTGCTCGCTA  
ACATGGTGTACCAGTACAAGGGCATGGGACTCAGCATGGGAACCATGGTGTGTGGCTGGGACAAGAGAGGCCAGGGC  
TGTACTACGTCGACTCAGAGGGAAACCGCGTGTGTGGCGACCTATTCCCGTGGGCTCGGGCTCCATGTACGCTTATG  
GTGTGATGGACAGTGGCCTGCGACAGGACCTGACCGTGGAGGAGGCCGCGAGCTAGGCCGCCGCCATCTACCAGG  
CCACATACCGCGACGCCCTACAGCGGAGGGCAGGTCAACCTTTACCACGTCCACAGCGAGGGCTGGACCAGGATCTCCC  
AGGATGATGTGCTCATGCTGCACACAGTACAAGATCAGGCATAGTCAGGAATAGGGAGGGTTAGGAGTTTATTCT  
AGTATCCAATGTGAAGATGTTCTGAAACGTGAGTGGGTTGACATATGAATAAAAAAGGACTCATTTGCCGATTGGC  
TTCACTTATATCACTTCTGTGGCCCGTTTTTGACTTGTGCTAGCTTAAATCTTTATATACAAGTTCAGTGAAGCTTCA  
TTCACCCGTCACGGTATGGGAGTATGATGTGAGGGTCTGGCGGGGGGGGGCTGATGACTCGAACATGCTTTAATATA  
GTGTGGGATCAGTGTGGTGTGTCCTACATACATTTAATTTAGTTTCATACCCGGGAAACTACATATTTCTCAATAAA  
ACCTGTCATGTTCTTTTTTCTTTTTCAAGACGGAAAAAACCACCTACCCCTATAGT

>Sequ07015EST2

CGGCTCCGGACCCAAATACCTGAAGGGCTGGAACGGTTAGACCCGGGTGAGTTGGTTGAGTTAGCCCGCTGCTGCGG  
TTCCGTGCTGAGATGTCCAGGGTTCTGATCGTCCGAGCCGGGCTGACAGGCAGCCTGTGCGCATGTCTGCTGAGGAGA  
GAGCTGCAGAGCAAAGTTTCCAGATAGTGGTGTGGGACAAAGCGCGGGGCTCGGGAGGCAGGATGTCCACCAGTCGTTCC  
CCTGACCCCTTCGTTCTCACTCTGCCGACCTGGGAGCTCAGTACATACCGCCACACCCGGCTACGCTCAGTCACACCAC  
AGTTTCTACTCGGAGCTGCTGTCTGCTGGCGTCTGACGCTCTCCCTCGCTCAGGTCGAAGGTTCTGAAGCAGAAAGAC  
GACAGTAAAGAACTACACAACGCCACTGGGACTGTGCAGTGTGGTCAAACACTTCTGTCTGAGTCAGAAGCAGATTTG  
TTCTTTGAGTGTGATGACTGGCCTGTACCGCCGCGGTGCATCATGGGAGGTTCCAGAGGAAAGAGGGAGACAGCGAG  
ACGTTTGTACGCTGTGGTCTGACGATGCCAGTCCCACAGATCCTGCAGCTTCAGGGAGACGTGGGACACTTCTTGTCT  
GTCCATCAGAAGCAGCAGTTAGAACGTGTCTGCTACTCGTCTCGTTTTCGCCCTCGCTCTCTTCTTCCCTCCAGACACC  
GTCTTCACTTCTCTTGGGCGGCTCGATACATCACTGACAACCTCTGCATCTGTACATCGCTGTGGATGCTCGAAA  
CGCAACCGCAGCCTCCTGGTTTTCGGTCCATCCCTCGTATCCACACCAGTGTGCCGTTTGGCCTGGAGCACCTGGAG  
CGAGACAAGGAGGACGTCAGCCCAATCATCTTACAAGAGCTCCACAAGCTCCTCCCGGTCTGCTCAGCCAATCAGC  
ATCAAGTGTGAGAAGTGAGGTACTCCAGGTGCTGACCTCGGTGCAGGACTGTCCGGGTACATGACCGTCTCGAC  
CGGCCATTGCTCGTCTGTGGCGGTGATGCATTACGCCACTCCAACCTTCGATGGCTGCGTGGAGTCCGCACTGAGCGTG  
CTCAGTGCCTGAAGCCCTCGCTGTGACACTGCCGCCACGACAGGAAGTCTCAAGGCAATGGACCAGGTTTCCAGAGCC  
CAACAGGAGGATCTGACCGATACTGACAGGATCAATGATCAATGGAGTCAATCAGTTAGGGTCAATACATGAAGTTTGA  
TGAAGTGGTTCATTAAGATTTGTCTTTAAATAAAGCCGTGTCTACATTAATAAAAAAAAAAACCACCTACCCCTAT

>Sequ07057SNP2

ACTATAGGTCAATGTGTCCCTTCCACACGTGTGTTTTCTGTGATCTTCCAGCAGCAGTAACGGGGACTCAGCCGGTCTGT  
GTGCTGTCAAACCTCATTTATTCTGTGCTTACACGCTTAAATATTTCTAACATGCTAAAGTCCGGTGGTCCGCGCGGTGG  
GAGCCGCTGTCCGCATGTCTCAGCCACCACGTCACAGCCCGGGCTCTGCCGCTCAGCTGCCCGACTCTGCGCTCTC  
CGTGTTCGGCTACAACCGGGCCCTTACCCGGTCTGTGGATGCTGAACAGCAAAGGAGCCTCGTCAGGATACAGGC  
CAAAACTGTTTCAGTCAAAGGTGTGCAACCCACGGTGTGCTGATGTTGGAGGACTGCACACAGAAGGTGACAAAG  
CATTTGGTGTATTTCTGTCTGATGAACTCAAAGAAGAGAAGAAGATCCAGAAAAACAAACTCTTCCCTAAGCTGTCTG  
GAGGATGGGAGCTGGAGATGAATGGCACAGAGGCTAAAACCTACAAGAAGTGTCTTGGAGAGAAAAATCTCTGTCTC  
ATTCACGTCAACAACAGCATTCCCTCCTAACTTTGAGGAAGAGGCAGAACAAGGTGACAGAGGATCAGCAGAGGAAGA  
GCCTGAAATTTGTCAACTCCCAATTTGTTGTTGAAGTCAAAAACAGGCTTCAAAAACATTTCCCTGGTGTGTTGACTG  
CCATTTCCCTGAAGACGAGATGAGTCAATGGCGAAGGAGAAGAGGAGAGCGACATCTTTGCCATCCGTGAGGTCAGTTT  
CCAGCCTGAGGGAGATACAGACTGGAAGGAGACCCAGCTACACACTCAACACAGACTCTCTGGACTGGGCCCTGTATGA  
CCACTTGATGGACTTCTTGGCCGACCGTGGGATCGACAACACCTTTGCTGATGAACTGATGGAGCTGAGCACCGCCAT  
TGAGCATCAAGAGTACATTAAGTTCCCTGGAAGACCTCCAAGGCTTTGTCAAATGTAACATAATGTTAGATAGAAGCTAA  
ATTTCACTTTTCTCAGTACACATCCGGAGATAGGATGATACAGTAAGACTAAAGCAAATGAAAGCACTGAATGATTG  
ATTTGTTTCCAGCGCACGAAGGAGACTGATGGTAGTTTTCTGTGACAGTGGAGCTTGTGTCAGCAACCGTCACTAAAGACT  
TATCTGCAAACATCTTCTTTGGTGAATGTGACTTTATTTTTCTGTAACCTAAACAACATAGTTTAAATTAATAT  
TTAAAGGCCATAAATAATGATAGTATGATAATCGTGCAGAAACCGTCAATGTAAGAAATGCTCTCAATTTTGAAGT  
TCCTGTCTTAACTGCACGGCTTCCAGGAGGTCAGTCAATTTATGAATGTTCACTTTCCAATAAAGGACAAATTTG  
TCAAGGTGCAAATCAAAAACAAAATATCAAAAAGTAAACAGTTTACAAAATCAACCTCACTTCAAAAATGTATGTGA  
CAGCTTCTGGCAATCCTGCTCCGAGTCTGACTTCTAGCTGGGCTTGTGAGGGAGTTCAGGTTGACCAACATTGATTC  
AACTCTGCCAGACCATAAGACATGAAGTCTACAGTTGAATGATATATATCCATGATGTTAAGAGAATGGAAGTTCTA  
TGTCCATTAACAGTTTGATAG



TAAATCACTGCTGCCTTCATCTAATTGTCACCTGAAGTTGTGTGTCTGTCCATTCTTATGTCCGTGGTGATGGCTCTGC  
AGTCCATGTGAACTCCTGGCCCTACGCCCCACATCTGTCCGACAGGCTGAGTATCTGTAGGTGTACAGCTTGTATCT  
GCTCCTCCACTCAACATCAGCCCGCTTCTGTCCAGTCCAAACAAACACTTTGTCTCGTGGGCGCCACGTCATAC  
AGAGGGCCCTTACAGCTTCTGGTGTCCCACAGTTTGCAGGTTGTCAAGGGAACCGGAGACCAGCTGGTGTCTCATGT  
GAAGGGCCCCACTTGACGGCGGTGACCCAGCCAGTATGCGAGGTTAGAGACAGCAGCACCAGTGACCCGCTCTTTGGTG  
CGAGGGTCCCACAGTCTGATGTGTCTGTCCGTGCTGCCTGAGGCCAGGCGTCGACACAGAGGTGAGTAGGAGATGCAG  
TTGAACACTTTACTGCCCGTACGCGTTGTCTTCATTCCCTCCAGTCTCAACGTCCCACACACGGATGGTGTGGTCCCAG  
GATGCACTGCAGACTTCCTCACTGTGCGACCAGAGGACAGAGGACACCGCCTCATTGTGCCCGGACAACGTATCAGG  
GGAGTCTGGTCAAGCCAGCTGTTGAGTCTTCTGTTTCTTCCCTCGGTCTGTCCGCAGTCTTCTCCACCTCGTCTGCC  
TCATCTGTGGGGACTGCGGACCAGATTTTTCAACATTTTGTCCCAGGAGCCACTGCAGAACTGGAGCCGGTGGGGTCT  
GTGGCAACAGTGTGACGCTCCCCGTGTGTCCCCGACAGCAGTGTCTGGCTTTCACCTTGTTCCTCTCAGAGTTCAC  
TCCCACATCAGGACGGTTTGGTCCAGAGAGGCCGTGAGAAGCACCAGCTCAGACCGTCTCTTTAACCAGGCTACA  
TCTTTGACTACATCTGTGTGTCCCAGCCAGCTCATCACCCTTGGCCCTCCGTGGACCAGATCCTGGCCGTCTTGTCA  
TAAGACCCTGTGAGGATCCATTGAGAATCTGCATCTACGGCGCTGATCCAGTCTCATGCATCATACTCCTCAGGC  
TCTGGAGCTGTGATTCGCTCCAGTACTCGATCTCCACCACATCTCCGTTGATATGCCTCTGTATCCATGTGAAAG  
GACAGCCAGTATCGCAGGAAGTACCCCTGACCCCTGACCAGGAAGTCAACCTCCACTTTACTGTGGACGCATCTTTAGCCAAC  
AGCAGCTTGTGATAACATTGCTGAGGTCCTCCACTTCAGAGCCAGCTGGGATGGAGAAGGGAACATCATCTACAACA  
TACCTTTTGTCTCAGTGAAGAACCTCGCCTGTAAGTGTGAGACATTTGTTCTGGCTCGTGTGTTCTCTATCAGACCGCCG  
GCTGTAGTAAAGTAAGAACGACTTCACCCTGCTCCTTGTCTGTCAGTACGCCATGTGGTACC

>Sequ07141EST2

CTAAAACCGGAACCGTTGAGCAGGGGAAAGAAAATGGCGAATCTCGTGGAGGGGACAACCCAACAGCAGTTTGAAGAC  
TTCTTAGCCAAAGCTGGAAAATGCCTGACCGTGGTACATTTCCAGGCGGCATGGGCTCCTCAGTGCGGCCACATGAAC  
GAGGTAATGGCCGAGCTGGCGAAGGAACACATAAGCACCACGTTTGTCAAGATGGAGGCGGAAGCGGTGCCGGAGGTG  
TCGGAGAAGTATGAAATCTCCTCTGTCCCCACTTTCTTTTCTTCAAAGGGGGGAGAAAGTGGACCCTGGACGGG  
GCCATGCCCGGAGCTGACCAAGAAGGTGCAGCGCTTGGCAGTGACCGGAAAGTCCGCGTGGAAAATGCCGAAAGTAGC  
AGCAGACAGCTGAAACAGCGGCTAAAGAAGCTAATCAACCGCCACCTGCATGCTGTTCATGAAGGGGTTCATCACAG  
GAGCCCGCTGCGGCTTCAGTCCGCGAGATAGTGGCCCTGCTGAAGGAGCACAAACATCCAGTTCAGCAGCTTCGACATC  
CTGTCCGACGAGGAGGTCCGACAGGAGCTCAAGACCTACTCCAAGTGGCCACCTACCCTCAGCTGTATGTGAA TGGA  
GAGCTGGTGGGAGGACTGGACATAGTGAAGGAGCTGGCAGAGTCTGGAGAGCTAGAGAACACCTGCCCAAGGCTGTC  
ACCTTGGAGCACCGGCTGAAGACCGTCAACCCAGGGCCAGTCACTGCTGTTTCATGAAGGGCAACAAGGAGGCTGCA  
AGATGCGGGCTTCAGCAAGCAGATACTGGAGATTTTGAATGGCACCGGGGTGATTATGACACCTTTGATATTCTGCAGG  
ATGAAGAGGTGCGTCAAGGCTGTAAGACTTATTCTAAGTGGCCACCTACCAGCTTACGTTGAAGGGAGAGCTCAT  
CGGAGGTTGGACATAGTCAAGGAGCTGAAGGAGAGCGGAGACCTGGTGTCAAGTGTGCTGAAGGGGAGCTGAAGGGGC  
AGTCTGAGGTGGATTGGCCATGTTCATCAGAGACAGGAAACAAGAAGCTGTTCACATATGCCTAGATCGGCCCTCTGTCT  
CCGATGCAAACTACAGGAGTCCAGGAAGTGAAGAAAC CATTGTGAAGAGAAAATAGAGTTAATTATCAAATAAAA  
CCTCTTCTAACCCTAAGTGTGTAGCATTGGATAGGTTTATGTTCTGTTTAAAGTTAAACAATGAAACTGCAGTTAACA  
ATGAGGACCGACGTTGGTTTTTCACTTACATTTTCCATATAGTGTACAAGAAGTTTTGCTTCGAGTAATCCTTGAAAA  
TACACTTCAGGAATGTGTAAGTGAAGTTAAGTGTTCCTGCTGCTGGCTAATATCATAAATCCTGCAATTAGT  
GATTGGTAGAAAACCTCCTCCTTGTCTATGTGACACTGGGTGGGAATAGTTGATGTTAGTTATATCTCTGTCT  
AGGTTACATTTTCCCTCCAGTATTCACAGCCTTGCCTTAAACAACAGGTTTATATTTAGTGTAGCTGACTCTTCCCTG  
CCGCTCCTGTCCAGCTGCTGTCCATGCATTTCTCACCTGAAAGACACTAAAACCTGCTTTTACCATATCCAAGAATCAC  
TCTGGTTTTAAATACTTTAAAACAAATTCTATGTTGCACCTATTGCTTTGTTTCTTCATCAGTAACAT

>Sequ07142EST2

TAACCGATGTCGGCTGACAGTTGGTCTAGTCTCTCGTGGTACCAGGCGAGATCATCATGTCTTCAGATCCGTGCTCC  
TTCTCCTCCTTACCAGGTGCGTACCAAAACACCTGAACCTTTCCCTCCAGCTGGACTTCGACAGACACGTCATCAGG  
GGAAAGGTGGAGCTCAGGTTGGAGGCTCTGGAGGACCGCTTCTCTGTTCTGACCTTGGACACCAGAGACCTGACGATC  
GTATCAGTGTACGCAATGGACAGGCGGCGCACTTCGGTCTGGGCCCAAACACAGCTTCAAGGGGACACAACCTGGAC  
ATCACGCTGCCCTTGACCTCTCCAGAGGGCAGCATGTGATGTGGAGGTGACCTATGAGACGCTTCCATCTGCGTCCG  
CCCTCAGTGGCTCACACTCAACAGACCCGGGGAAGAAGCAGCCTTATCTGTTACGCCAGTGTCAAGGCTCATCACT  
GCAGGATATGGTCCCTCCTCAGGACAGTCCGCTGCTCAAACACACCTACTACGCTCAGTGTCTGTACCTAAGGATC  
TGGTGGCTGTAATGAGTGCAGTGAAGAGACGGACAGGAAGTGCATCCTCAGGACAACAACCTGCATCATCTACAGATTCA  
GACAGCCGGTGGCCATGCCTTCTACCTGATAGCCATCGTGGTCCGAGCTCTGGAGAGCAGGGAGATCGGTCCAAGGT  
CCAGAGTTTGGCTGAGAAAAGGTTTGTGGATAAAGCAGCGTTTGTGTTCTCTGAGACGGAGACCATGTTGAAGAGCGC  
TGAGGATCTGGCTGGACCGTACGCTCTGGGGACAGTATGACATCCTGGTTCCTCCATCTTTCCCTATGGAGGCAT  
GGAGAACCCTGTCTGACCTTCGCCACGCCGACACTGTGGCAGGAGATAAATCTCTGTCTAATGTGATCGCCCATGA  
GATCTCCACAGCTGGACTGGTAATCTGGTGACCAACAAGACCTGGGAACAGGTACACTGTCTACCTGGAGAGGATG  
ATTGGGAGGAGTATGGAGAGTGAACAGTTCAGACAGTTTAAAGCCATGGGGGGCTGGAAGGACCTACAGGACTCGGTG  
AACACCTTCGGGGCAACAACCTTTGACGAACCTTATCCCCAGTCTGCAGGACGTCGACCCCGACGACGCTTCTCC  
TCTGTCCCTATGAGAAAGGCTTTGCTCTGCTGTATCACCTGGAGGAGCTGATGGGAGGCCAGAGGTGTTTCATGGGG  
TTTGTCAAGTCTACATCCAGATGTTTCGCTACAGCAGTGTCACTTCAGAGGAGTGGAAAAACTACCTGTTACCTAC  
TTCAAAGACAAGGTGGATGCTCCTGAACAAGGTGGACTGGAACGCCCTGGATGTTCACTCCAGGGATGCCCTCTGTCAA  
CCTCAGTATGACACCAGCTGGCAGACCGCTGCATCGCTCTGAGCCAGAGATGGATCAAGGCCAAAGACAGGATCTG  
AGCAGCTTTAAAGAGTGTGACGTGAAGGCTCTGTATCCACCAGCTAATCGAGTTCCTGTCCCTCCTGCTTCAGGAG  
GATCCTCTTCTCTGACTCATGTGAAGAAGATGCAGGATGTTTATGGTTTCAACACCTGTATGAACTCAGAGATCCAC  
TTCAGGTGGCTGAGGTTGTGTGTTCCGTCCAAGTGGGAAGAAGCTGTTCCATGGCACTGAAGATGGCGACTGAACAG  
GGACGGATGAAGTTCACAAGACCACCTGTTTCAGAGAGGCTTTAACTTTGAAAAGTACCGTGGAGGAGCGGTGCGAGTG  
TTCTGGCTCACCGGGCAGCAATGCACCCGGTCACTCCGGACTGGTCCCAAAGACCTGAAAGTGGACGACCCAGCCAA  
ACCACAGTCTGTAAAACCTAGTCAGAAAACAGTATTAATACCCGGACAACAGTATCAGCAGCAATCAAAGCTCTTC

ATTCTTCACGCTCACCTGTCAGCTGTTTCTCTCAGACTGTTTGTGATGATTTTTAGTTCTCTGGATGAACATGTTTC  
ATGTCAGAAGAAATTTATTTAANAAGAAATAAAATCTAGCCT

>Sequ07148EST2

CCACCCGTGAGCTTGCCAGCTTGTTAAAGAATTCTTTGGGGTAGTGGACAAAAACAGTGTGCTTTGAAGCTGGCCAT  
GGTTCCTCGCTCAGCCAACTTAACTATGGAACCGACCCTCAGACTGGACAACCTGCTCCGCTATCCACTGGTCACTGT  
GCATAATGTGTACATCGTTCTGGGATCCCGTCTCTGATGGAAAGGGCCTTCACTGGGCTGGAGCATCTCTTTGCTAG  
TTCAGGGACCCTTTTACACTCGTGAGGTGTTTGTGGATGCAGATGAAACAGAGATCGCCCCCTGTGCTGACCAA  
GCAGGCTGGTTGGGGTAAGAAGGTGGCTCTAGGCTCTACCCGACTGGCTGAGTAACTATCACCGAGTCAAGGCTGGT  
CCTGGACTCAGACAGCCAGGAAGAGGCGGACAAATCCCGGGCGCAGCTGTTAGATGAACTGCCCAAGGGCAGCGTGGT  
GCCCTTAGTCACTGACCCGGTGTCCATCGCCACTGCTGAGGTGTACACACTGGCCAACAACGGTACGCCGTTAGGTGA  
GAAAGTTATGTCTGCTCTGAAAACGATAGAGGCTGCCTGGATCAGTATTCAACAGGGGAAGTCTGTGTGGCTTCAA  
CGGAGGCAAAGACTGCACGGCGCTGCTCCATCTCTACTATGCTGCCTGAAACGACGGTATCCAGACGGTAAGGACAA  
GGTGAAGCTCTGTATATTCGTATCGTCTCTCCATTCCCAGAAATGGAGAGATTCTCCAGGACACAATTTAAAGGTA  
CGACCTGGATCTCTCTGTGGAAGGCAGTATTCCGGCAGGCGCTGAGCGAGGTGCAGGAGCGGAGGCGGAGCTGAG  
AGCCGCTCTGATGGGGACCAGGAGGAGTACCCCTACTCACACACACTCACATCCATGTGTCCCACCGACCCCGGCTG  
GCCAGACTACATGAGAGTCAACCCGTTACTAGACTGGACGTATCATGACATCTGGTCTGTTTGGAGACGCTATATGT  
GCCCTACTGCATTCTCTACGATAAAGGGTACACTTCACTGGGCAGCATGGACAACACCTGTGAAAACACGTCCCTCCA  
GATGGTGGATGGGAGGGGGTGCACGGTACAAGCCAGCCTACCTCCTGGAGAATGAAGAAGAGGAGCGAAACTCCCG  
TGCCTGATGTAGCCTCACTTCTCCCTGTACCTGTTGCTGATGGAGCCAGATTTTTCAGATCACCACTCACACTATTGT  
CCTTGTGAAGAAAAGACTCAACGCATCCGACTGCAGAATGAGATTGTGAAGGAAGTCTGGTTGTGTGTGTGTGTGTG

>Sequ07149EST2

CTGGACACTTGGTTCATCTGGCATTTCCTCTATCTTCCGATGGCCAAATGAGACACAGGACCTGAACGTG  
TTCTACCCTGGCACCTTGTGGAACGGGCCATGACATCCTGTTCTTCTGGTTCGCTCGTATGGTGTGATGGGCCCTC  
AACTGACCCGGCAAGCTGCCATTCAAAGAGGTCTATCTGCATGCGGTCTGAGGGATGCCACGGAAGGAAGATGAGC  
AAATCTCTGGGCAACCTCATTGATCCTCTGGACGCTATTACAGGGATCCCTAGAGGGTCTTCATGCCCAGTTGATG  
GACAGCAACTTGGATCCTTTGGAGGTGGAGAAGGCAAAGCAGGGCCAGAAGTCACTACCCAACTGGCATTCCAGAG  
TGCGGCACAGATGCTCTCCGGTTTGGCCTGTGTGCCTACACTAGCCAAGGTAGGGATATCAACCTGGATGTCAACCGC  
ATCCTCGGTTACCGTCACTTCTGCAACAACTGTGGAACGCTGTGAAGTTTGCATGAAGACTCTGGGAGACAACCTT  
GTACCATCAGAGAAAGCCAGCTGTGTGGAGAGGAGAGTGTGTGACAGAGGTGGATTCTGTCTAGACTGAGTGTGCT  
GTTGCTCTCTCGGATGCTGCCTTTAAGGCCTACGACTTCCCAGCCATCACCAACCGCCATCTACAACCTTCTGGCTATA  
GAGCTCTGTGATGTCTACCTGGAAAGTGTGAAACCTGTGTTTCAAGTAAAGCAGAGGAAGACAGTGCACGACGAGAG  
GCCCTGGTGTGCAGACAGACCCTTTACACCTGTCTAGAGGTCCGGTCTCCGCTCCTGTCTCCTTGATGCCCTTCTGTC  
ACTGAAGAGCTTTACCAGAGGTTACCACGAAGACGACCTCAGAGTGACCCCCCAGCATCAGTGTACATCCTATCCCA  
ACACAGAGGAGTTCTGTGACACAGTGAGGAGGTGCACCGTGCATGGAGTTCGTAATGACTGTGGTCAAGACAATCC  
GGTCACTCAGGGCCGACTACAACCTGACCAAGACCCGAGCTGACTGCTACCTCGAGTGCATAGACTCTGCAACTGTGT  
CCCTGGTGCAGAAGTACAGTCTGCAGATCCAGACCTTGTGCTATTCTCAGGCTATCATCCCTCTGACAGCCAACCCAG  
CTGTCCCAGAAGGCTGCGCTGTGGCTATCGCCTTGACAGATGCATGCAACCTTATGCTCAAGGGTCTCATTGATG  
TGGAGAAGGAGGTAGCCAAAGTGAATGACAAAAGAAAGGTGACTTGGAGAAAACAGATGGAGAAAATGGAGAGAAAATGG  
CAAAGAATGACTACAAAAGAAAGGTGCCAGTGAAGGTGCAGGAGCAGGATGCCGAGAAGCTACGGCAGAGCCAAACTG  
AACTTGAGAAAAGTGAAGAAGCCGTGGACAACCTCAGGAAAATGATGTAACCTTCCCTTTTAAAATTTATGTAATCAA  
GATTTATTTCCACTCTTTTGTATGTTAGTGTAAATTTTTCATATTCATTTATCAAATTTGATCATAGTATGGAGGGAATTC  
AATAAGCTCTGACAATTG

>Sequ07153SNP2

AACACTTTGAAATGAGGGTGTGAATTATACTTTATTATATAAGAAAGAGCAAGTTTTCTCGCTGGATTTTGATTAC  
ATTTAAATTCATGTGTGCTAGTTTCTCTTAACTGACTCTATGATTGCAAGAGAGGTCAATCGTTTTCATCAGGCTTATTCTT  
TAATAAGAGACATTAAGTGTACTGTTATAGACTTTTATTACCGTTTCCAGACGGTGTGCTGCCTCTGCGAACGGTGCCT  
GTAACGTTTATGAACTCGGTTGTTTTTTTTGCAACAGTGTGGAATCAGGAAAGTGTGACAATCAGTGTGTGAGACTG  
TCCTGATGAGACCCCAAACATCTGCCCTGTGATGTGCCCTCGAGCCGCTGCATCACCATACTCGTAGAGAGAAATCA  
GAGCAAGTGCAAAAGTATGATTTCAATAAATAAATATGCACAGGGCATTACATCCTTAAAATTTTCCCAGATTTCAA  
CAACCAAACCAAGTCTGTCTGAGTTTAGCATGTTCTTAAATATCGGTGTTTTGAAATTTAATGTGCGTTCCAAGGCTT  
TACATATAGCAGTGTTTAATTTAACATTGTGTCAATTTCAATTAACGCTTATCCGTCCATTTTAAATGTGCGCTGTCTG  
TTCAGTCACTCGTCCATTAACGGATTACAGGGACCATAACTCACTAAAGAGCTGTCAGGTATTAGAGATAACGTCTCT  
ACAAGTTGTATATACAGGAAGCTGATTTTAAATTAAGTGCCTGTGATGTTTTTGTATAGGATACAATAATGTGTTTCA  
CGATGTGATTTAAAACACAAACCTATTTGTAATTTCTGAGTTCTCCCTTTTCTGTTTGTGTTGTTGTTGTTGTTGTTG  
GAAAACCTTGTATTTTGTACAGAGTATTTCAGTTTGTATTGAAAGTTCCCTATTAATAATGAACTTTTTCAT  
AATACGAAAAAAAAAAAAAAAAACCGACCTACCCTAATA

>Sequ07190EST2

GAGACGAGGGGAAACAGATGACTCTGCTGCAGCTTTTCAAGTTGAGGTTGACTGAAAACATCCGAGGGCTGTTTCAGAA  
CATTTAAACCGCCAGAAGGAGTCACTTTGAGAGATGCAGTGTGAGTTTACCTGACTGAGTGTGAGTCCACGTTCCCA  
CGCTTAAACCGTGGCGAGCGGGGGCGTGCAGCCTTGCCAGAGTGGGCGTGGCCGGCGATGGACAGCCGATGCAGC  
AGCAGCGCCGATTACCGGCTGACCGGCAGAGGGTTGGGCTCTATCAACACCACGCCATCTGCGCGAGGGTGGAGTCC  
TACGAAGCCGTGGAGAAGAAGTGCATCTCTGACGTGAGGAGGACCTTCTGCCTTCTCGTCACTTTTACCTCTTGTTC  
ATCACCTTGTCTGGATCATAGAGCTCAATGTGAACAGCGGCATTACAGCAGCAGCTGGATAAAGAAGTCTGCCTAC  
GACTACCGCGCCTCTTCTTTCGACATCTTTCTGTGGCTGTCTTCAAGTTTGGCGCTCTCATCTGGCGTACGCCGCT  
TGTAAGCTTCGTCAGTGGGCCATCGCGATCACCAGTCCGGTCACTGTGCTTTCTCATCGTTAAAGTCAATTTTA  
TCAAAGCTGTCTCAGGGGGCTTTGGGTACCTGCTGCCATCATCTCCTTTGTGTTGGCGTGGATAGAAACATGG



CTGCTAGACTTCAAGGTTCTGCCTCAGGGAGGCCGAGGACGAAAACNGGTATCAGTCATTCATGGACGCCAACAAAGC  
GAGCTCCACTCATGT

>Sequ07210EST2

CAAGACGGATGTGCTCAAGTNCCGGGTTGCTCTNAACCCCAAAGAACTACCAGACGTTGCAGCTCAAAGTCACTCCNG  
AAAACACGGCCCCCTGGTCCAGGAGGAGCTTCAGGTTCTGGAGAAGTTCTTTGAGACACGGGTTGCTGGTCCCTCCTT  
CAAATACAACACTCTGAATGCCTTCACAAAGCTGCTGGGGGCACCCACTAACATCCCTTAGGGACTGTGTGCGCATCAT  
GAAGCTGGAACGTGTTCCCTGACCAGGCTGGACAGCTGAAGTGAACGTCCAGTTCCTGTCTCACCATCCCTCCCAGTGC  
TCCTCCCATCGCACCACCTGGGACCATCGCTGTGGTGTCTCAAGTCCAAGATGCTCTCTTTTTTGAGCTGACCCAGCG  
TATCCCAGTGCCCCAGGACCCAGTAAGCATTATTGTACCTATTGTGTACGACATGGCCACAGGCCTCACTCAGCAGGC  
TGACATCCCCAGACAGCACAGCTCATCTGGGGCTGCGGCACTCATGGTCTCCAATATCCTTAAGAGGTTCAATGAGCT  
GCACCCCGCAAGACAGGGTGTGATGTACGATATTTACATCTGTTACAGAGCTGATGGCCAACCTCACTCTACCCCCGG  
CACTCGTCAGTAGAAACAACAAATTCAGAACCAGTACTGGAACCTCGACTGGAGTCCCTTTGAGACCGAGGATAGGTCC  
ATCATTTAGCTAAGAAGAAAACAAGGGAGTAACAGCTGTGGTCCCCAGACATCAAAAATCCAGCATGTGTCTTTCTGTCT  
TCAACCACTGGACTTTTGACCTGATGTATTACTGTTTATGAAAGGGAGTACAATATGTACAGTCTGTGGACCCACAG  
TCTTTATTCTTGATAGAAGCTTACAAACAAGATTTACTGTTATGGTAGATCTCGGACAAGGGGGGCATTTGATGCAAA  
TGGATATAAATGTTATTTTTTTTTCTCGAGGTGCACCTGTAAACAAGATTATCTATTGAAATTTATGGTTGTTTACGAA  
AATAATGTACATTTGTGTATATTTGAGTGTGAAAAGAATCAGGTGAGTTAGAATTTTGTAGAGCCTTGTCTTCTAG  
TTTTTTTTTTTTTTTACAATGCCATACTGATATTATTGTAGTATCAGGAGATATATTCCTTAGCACACTATTTAAATGT  
CTTCTTGCCTTTACGCTGTCAAGACCTCTGAAGTTTTATTTCAAACCTTCACTTTGGATACTGTAAAACCTGTGACAAA  
CTTTATAAGCCAGTTGTATTTACTAAGACGCATTTTGTGCTTTGATTGAAAGATTTGAGACATCTTGTCTGACTTTG  
CTATTTAATAAAACCAAGCCACAGCTGGTTTGTGCTTTGAGGATCCCCAGAAAAAAAAAAAAAAAAAACC

>Sequ07264SNP2

GTTCCCTCTTTTTAATATTCACTTGCACATGATCCATTAAGGTGTGATCTTAATGTACAACAAAGGCTGGCCATGGTA  
ACAGGCATTACTCTACCCTCTACTGGCAGGACATGAAATCCTCTTCAGCTTCAAATGAAATTCATCTTCTCTGGTGAA  
GGATGAAATATCAGTGTGGTACAAAGTAATTTTACTAAAACAAAATACCAAAAAGGATGAATCATAGATTTTTACAC  
TCTTCTCCACAAAACCCAGTGAAGGAATAAGCTCAAAAATACAGACTGCCTTCGCTTTTAAACCTCCAACACCA  
AGATTACAGACTTAAGCATATACTACACAACCTTCAAATATACAAAAAGATAGTAAAACAGCTACAAGCACGTTAGTAT  
TTACAGCAAAGTCTCTCTCTGTTGAAATCAAAGGAACATGGGTACACATTCAGAACACCTGTCTTGTTTTTTCAATTTG  
TAACTTCCAAAAGGTTCTGGTGGTGTAAAATAAAGTAGGAACACAAGCCTCTGCACCCCTCTCAGGGCACATCAGTA  
CTTGTGTAACAGATGTCTTGATGTTTATTAGTATCTGTACAGTGGTTCAGCATCCATTCCCGTAAGGTCCGAGCCA  
AGCTCTACCATCTCCCTCTGTGAAAGGTGGGCACCCGAAACCTGGCTCCCATTTTCGAAATGCCTCCCTTCTCTGT  
CATCCATGCCCTCTGGTCCCATAGACGGATGTCTGATGGAAGGAGGACNCAGAGGAGGGAAGGGCAATTGGCATTTGA  
ACCTGTCCGGTGGAAACATGGGTCTCCGGGCATCATTTGCGGAGGCATGTGTGGCATGTTTGGAGGTGAGAGGAATG  
GAGGTAGATGAGGATTTGGCATGCCAGGAGGAGGCTGCAGAGGAGGCATACCCGGTCTGGGACCCTGTATGACTGCTG  
GGCCTGGCAGAGTCATCACTGGTGTGCAGGAGAGCCAGCTGGTTGTCACTACCTGCATCTGAGAGTGTACCTTTTT  
CTCTATTAGAATCCTTGGTGGAGTCTCTGGAGGTTTTAGACTCCCTGGTGCCTAATTTGAAGGGTCAAACCTCAGGGG  
GGATGAACGGGGCTCTCCTCGAGGCAAGGCTGTAGGGGACAGGATAATGGGGCCAGGGAAGCAGGTGGACTTCTGA  
TGGGTCTGTCTGTGAACCGCTGGCACCTGAATGTGAGCAGGATCGTTCCATCTGCTGGTACACTTTCCAATGCTC  
CATTTAAGTGCTGCTTATTGAGGTCCCTGGCATTATTCCATTCTGGATTTAGTGTCTCTGTATCCAGCATCG

>Sequ07286SNP2

TAGGGTAGGTCGGTTTTTTTTTTTTTGGTAGTGTGGAGTTTAAATAAGCACTTGTGAAGGATTCAGTTAGAGAATGC  
TGAATAAACAAATATCCATAAAAAATAAACATTACCCTCATTTTTTACAGCTGACCCACAAATAGCCCCAAAACAAGAA  
GTAGATCCACATGTACAGTCCCACCAAAAATCTTTTTTCTTCCCCCATTTGTTTTTACAAATGTATTACTGTACGAAC  
ATATTCATTTTTCAATTTATTTCTTTACGTGTATCAATTAGCGTACACCCACTACCACCAGTGGCTGAAGCGAAAACGC  
CAACACACCTTAAATCACACATCTAAAGATTGTTGTAAGAGTTGAACCGATAGTTTGTAGTACGATGGAGCATTGTGG  
CATCGGTGGAGGCCACAGGAAGCAGCAGGAGCCCTGTGCTGATGTCTCTTACACCGATCCATCGCCTGCTTGTATG  
TTATCTTCTCTTTGGTGATGGGGTCTACCAGCTCTTTTGTGTAGGAAGCCTCGTCTGCAGATGACTGTGTGTTTAC  
TGTCAATTAGTTTTGGCGGCGAGAGCTTCTTCGACAGTGGCCAGCTGCTTTAGCGGGATTACCAACCCCGCTTCA  
GGTACTGCGCTCCATGTACTTCTGGCATTTTCTGCGGATATTCCTTTCTGCGCTGCCAGACCTCATCGGAGAC  
GGTCTTTGGTACAGGATCCTCGACTCCAGTGAAGGCTTTCTGGGCATTCAGGAGTTTATACATGTGAGCTGTATCAA  
TGAGACCATATTCAGCTGCCTTATGGACAGAAAATTTGTCCTTTTTTGGCGATATCAACAATTCACCCGGAGGCTGCCT  
GTGCCTCAAGCAACCTAAAAGCTGTATCGGTATCAATGAGTTTGGGGTACAGCGCTTCTGACGGACATGCGGCTTT  
CAGTGGTGTGTCGTAATAACAGAGATTGGGAAATGCTCATCGCCTGAAGCATTGAGGCTGTTTGAAGTCCGCTGA  
GGTGTGTTGAGGTTGGTGTAGGAGGACCTCAGAGAGGTTGACATGGAGTTCAAGGGAGAGGTCGGGGTGGGTTTGG  
TGGGTGATCTTGGGTTGTTAAT

>Sequ07309EST2

TTGCGTCAATTAATTTATTCAATTTCCCTCCCCATCATAAAAAGAAATGCGGTTTACCAAAGCTACTACATACATACAAA  
TGGCCATACAACAGCAGTTAACCATCTTGTGCTCAATAAATCCCTGAACCAAGTTTGTTTTTTTTTCAGTTTCTCTTGT  
TTGTGGGTTCTTCTACTGTGAAAGAAGTGCAGGCGGGCAGGACACACAGCTTAGGAACAAAACAACTAAGCAA  
CATTTACAGAGGTCATCTATATTTTATACAACAAATGTTTCGTTTTCTTTTTTTTTTTTTTTTTTTTTTTTTTTT  
ACTAACTTGAGCTAAATCTGCTTGTAACTAATCCAGAAGTACACACAGCTTGTGTGAGGAGGACAAAAATTTATTTT  
TTTTTTTTTTGCATAGTTTCTCTTAAGGCACATTGGCTCTTGATAAACACGTAAGTGTGAGTCTCTGCTGCTGGAAG  
AACCACCTTCAATTTTCAATCAGACAGATTATAACCAGCGTTGAAAGGCAGAGCAGGTCTCACTCATTTTCAATTTGATG  
TTAAGTGGATCGACACTAGCAGCACACATCCATTTCTGTTGGTTTGTAAAGTGTGACACAAACATCTGGCGTTAAAAC  
GAAAATGTGCATATTCAGACATTCAGTTGTCTGCTGTAACCTCCACGTGTATCAAAATGTCTACACACAACAAATTTG  
TGCAACAGGTTGGGTTAAGCAAGTGAAAAGGCAATGTGAATCAGAATCAAAGAAGACTTTGCATAAAAAGAGGCGTC

GTGGCAAGTGACGGTTTTCCGTAACAAGGAAGAGGACTTGGATGCACAAACGTCCACTCATCAGTTGTAAGTTTTAAA  
ATAATTTTTCTTTAAATTTATCTTTTTTACGTGTATTTAAATTTCAAATGAAATGATTTTTTTTTTCTACTTCACATATTTTCG  
ACACCATGGCAGCAGAGAAAAGTCCAGCGAGTGTTCAGTTGTGTTAATGGTGAAGTCAAGTTCATTGTCTCTTTTCAGA  
TAGAAGGAAAAGTAGAGAGGGGTGTTTGGGGCAATAGACAAGTCTGACCCACCTCTCTAACCCAACTGGTCCATATTT  
GCTTACGGAAGCAGTCTCCAGTAGGGAAGAAGTCCCAGCATCTCTCCTGGTACATCTTCCACACATATGACTCCTGAC  
CCGTGTGTTTTCAGTCTCGTCTTGTAAATCAGGTACATCAAGAAGAACAGGTAGTTGGCTAGGTTGTGCTCTTGTAAAGG  
TGTGGGTTTTCAAACCGTGAGGCGTCCGATCAAAGTAGTCGTTGCCAATGCCACAGATGAAGCATTGTTGGTCTCCATGT  
CCTCCTTACCTGCTCCTGCTGGTCTCTCAGCTCACCAAAGGCATCAATGATCAAACCTGAATGATGGCCAGCAGGA  
TGACGATGACAAAAGAAGAAGGTGATGTCAAACAGGATGCGGTAGAGCTCATAAGGGTCTCCAGCTGGGTCTCCCA  
GCTCATCTCCAATACCTCCTCCAGCTCTCACACCGACATACATGTGGAACAAATAGCACGTCATCATGTCTGTCACACT  
TCAT

>Sequ07328SNP2

ATATAAACTTCAGTCTTTGTTTTCTTCTGTGAAAGTATGAGCTAATGAGTTAAAGTTGTTTTCTTTGACCAGTGAT  
TGTTTTTTATTTATGAAGAGTAAATTAACAACAGGCCTGTATGTATCAGCACTCACTCAGGCTCTGAGTCTGCACTGT  
GGTGTCAACAACGAAATACAGAAAAGAAAATAAGATCAAACTTTAAGGCTTAGTCCAAACATATTAACAACTGTTCTCT  
CTCCTTTTCAGAGTAAAATAATGGTTCGATAGAACAACAAACAGCTGCTGATGAACAGTTAGGTCAACCAAGTTTACTCGTG  
GTCACAGTGGAAAAATTTGGCCTAAATTTATCTGTTTACAGCTTCATCCTGAGTAGGAGCAGAGTGTGCTTTGGTACA  
GAAAAGAGTAAGACAACGTTGGAGAGATTGAGGTAAAGAAAAGGTAGTGAATAGAAGAAGAAAACGGAATCATAGAGT  
TCACTGAGGCTCGGCAGGTTTCAGCTCTAATCCAGACTCATGTCTTCGTCTCCTCTTTCTTCTTTTGGAGTCTCCTT  
TGGTGCCCTGCATGGCTCTGGCAAACGCCTCCACATCTCCTCTGTTGGCGCGTCCACAGCCTCCGCGGCAGACCAA  
ACTGACTCATGAGAGGGCCGAGCTGCCCGGAGGCCAAGGCACCTGCTGAACATACTCATCGACTGCTGGAACCTGAGGTG  
AATTGAGTGTGTTCTGGATCTCTTCGGCACTCTGTGGTAAACTCTCTCCGCTGGGGAGGAAGGGGAGGAGCCTCTGCT  
GGACCTCAGCATTAGTCAAGATGGGAGCCATCATCTCTGGGGTGCAAACACTCGCCAGGTCCACTGCTGATCCCTGAG  
CAGCCGTTGCTGGACGTTTCATGGTGGCGAGGATGCTCTGAAGGTCACCTCAGCTGGATGGGCTGGTGGGGGGCAGGGC  
TTCCAACAGAGGCTGGGGCCAGAGGAGTCTGAGCTGAGGCTGGTGTGGAGGGAGCAACACCAGTAGGTGACACGGCTG  
AGGCAGCAGGAGTCAAGGGGTGGTGGGAGCCTGAGAGGAACCTCAGTCTGGGGGCGCCGCCGATGAAGGAGTGGCTG  
CTGTGATTGGCTACGAGAGCTGGATGAGGAGCTACTTGTGGCTGGTCCCTCCACTGCCAGCAAGTTGGCAAGTCTCTG  
GCCCTGCTAGAGTCCCAGGCCCCAGTCCACCCAGTCCCCTGGTCCAATCAGCTGCATCAGCTGGTTGTGGCTCATG  
TTTCCCAGGAGTTTTGAGGCCCCCTTCTCCTCCGAGCGCAGAGAGCTCATGGCCGCTGCCGCTTCCGCTGCCTGGT  
GCTCCGGGGATCGGTGGGTTGTTT

>Sequ07340EST2

GATCGGGGGTGTAGTGCAGATATTTGACCTGGGCCGAGGTCCTGAGGCCAGTCGCCACCATAGAGCAGGGGGGCTG  
CGGGACAAGCTGCTACTTGTGTTGGCCTTCAACTGTGAGAGCACCATCTGTTGGCGGTGGGAAAACACAGACGGGACGG  
TTGGTGTGTTGGCAGTGTAGTCAAATCTGACCGAGCAAAGCCCCAGAGAGCAGCACTGGAGCAGATAGCCAATC  
AGGTGGCAGAAATGAGACACATGACCTGTTTTCATCCTCTGTTTATATCAACTGTGTTTTGTAAAAAACAAATGAAAAA  
ATGTTTTTTGTAATTTTAAAAAAGACTCAGTGTGGAAGTGAAAAAAAGGAGTGAACAGAGGTTTTCCAGTTCTAACCA  
TAGCCTTTATTAAGCACACTGCAGTTGTTTTCAGGTGTTGGTACAACATTAATGTTACTATTAGGTTCTTAAATTCATC  
GAAAGCACAAAGCTAAAAACAGCTAAAAACAATCACATTTCAAATGCAGCAGATCCACTATGCTGAGAACTGACAAA  
GTTAAGGTAGAGCGAGATAAATAGAACAGACAGTTGTTATTAGTGAGTTTTCTGGTGCCACAGTCATGCAGTTTTCAGC  
CGTGTGTTCTGTTGAAAGTGTGTGAGGGAAAACCGCTCCCGATTGGTCACTGGGGGGCGGGGGATCAGTTGACGAAGA  
GCGAGCGGGTGAATTCGACAAAGTCGAAGGCTGACGGCAGCTCGCGGCCCTTGTCTGTCGAGGTAGGGCTTCATGTGTG  
AGAGACAGTAGTCCGCTGCTCCTTGGTCAAGTTCTGGTAGAGCTCTTCTTTAGTCACGTAAGGTTTTGTTTTCGGTGC  
TCAGACTCGGAACCGCTCTCTATCTCCTCACTGGACTTGACGTTCTCTGTCTCAGGCTGATCAAGCCATGAT  
ACTCCTGCAGCGACAGCTTGGCATCCCTGTTGGGATCCACCGTGTCTGAGTATGGCTCGAACTCAGGATCAGGTTCTC  
CCTCCTCCACCATGGGCAGGTCGTAGCCTAACGAGCGCAGACACGACTTGAACCTCCTGGTGGTTCAGACGACCAGACT  
TCTCCTTGTGCAAGTGTGTTGAACATCATGCTGAACCTCCTCAGAGCCTCCTCCGTCACTCCAGTGGTGTTCCTGGCCT  
GTATCTGCTGCTCAGGTTATGCTGCATCCTCATTCCAGTTGGTCCAGTTGGTCCACTGCTGGGCCAGGCCACTG  
TGCTGTGCTCTGTGTAATGTTGTTGTTAAGATCAATGCCTCCTCCATAGCTGCTCCAGGCTTCAATCTTCTTTCAGT  
GGTCCGCTGAGCCCGGATCTCCTGGTGTCTTACGTTAGTGGCTCCAGTGGGACTCCAGGGTACCGGACTCCTCCA  
CCATACAGGACCAATCCAGAAGATACGCTCCTGGTCTCCTGCAGCCACTGGTGGAAAGCGTTGGCGTCTGCGCAAAC  
CCTGACGCAGTTTTGTCGTTTTCTCCTGTCTCCTCTGCTCCTTCTGCAGCTCCAGCTCTCGCTCCTTGATGATCTTCT  
GCAGGTTCCCTCAGGTTCTCCTCCAGCGCTCCATGGTGAACCAGGTGTAGGGTTGGAAACCACCTGGTAGCTCTTGA  
TCTGCTGGTCCAGCTCGGCCAGCTGGTTGAAGTCGGCCTGAGCCGAGCTCAGCGAGGAGCGGAAGGCCTCGTGGGCCT  
CTCTCAGTGCCCGGATCTCCTCCAGAGAGTTGCACCTGACCGGGTCTGTGAGGTTCTCCTCTGCGTTCTCGAACCAAGC  
TGTTGAAGGCTGAAGCTTCTGGCGAATGTGAGGAACAAGTCTCAACCTTTCTGAAGTGTCTCTGAGCCTCCAGAAG  
CTTCTTCTTGCAGCGGCTGAGTTAGACAGCAGTGGTTCCAGGCTTCAATCAAGGCAGCGTGGCGAGTTTCCA

>Sequ07341SNP2

AGGAGTGAAAGTACTCGAACTCCTCCGCTTGGACTCATTCTATGTTGGCTTTTATTTAAAAATTAATAATCCTTTTTT  
TTTTTTTCTTCTCCAAACATGTGATGGGACTGCTGTGTTGCTGAGTGTGAAGTGCAGTCAAGTTCAGACTGAGTGTGCT  
TGGTTGCAGACACAGTGAACACTCGGACAGTGGAAATTTGAATGAGTCAATGAGTGCAGTGCAGCTTTGGCAGGACT  
CCTTTGGAAATTAAGGGTCAAGTTCACCCAAATGACAAGCCATATTTTCTCACTTAATACAAGTGGTGCAGATAGTTT  
GTTTTTGATTTCTGCTTCCACCCTGACACTACAGATAAATGTCATTGAAAATGTGCCCTTTCATTTTTTAAAAATCTAA  
TTTTGGGATAATTTCTCAGTAGACAATGAAAACCTTTTCTCTTGTATAAATTTAAATGCCATTACTAAATCAGAAGA  
GATTAACCTGGGGAGAAAATAGCTTGATAAATAAAGCTCTGGATCTGCATTAAGGCCAGGAGAGAGGGGGCTTATTATC  
TCTGAACTGACTCTTAAATGTTGCTTTACATGATACGAAAGAGGTTGTAATCATTTGGGAGCATAATGTGACTATCAG  
GTTCATTCATTTCTGTGGCAAATCTTGGTGTGTTTTGCTGTTTTCTGCCCTCAGGTGAGAAACATGAGAACCTGTG  
GTATGTGACGCAACCGCAACACTTGAATATTGAACCTGCACATGTAACACTGTGCTGCTTTACAGATGTCTCTCC

ACCATCTGCAAACCCAGCTTCCCCAGCACATTCACCGTTCAGTCTCCGCTCTGCCAGAAGAGACGTCTCAAGCGTGA  
ACTGTGTTGTACAGAAGTTGCTTCTGACTTAAAGAGTTAAAATGGTACCAGTTCTGTGAATAAAGGTATTT

>Sequ07345EST2

GACGCACTATATACAGACACTATACGAAGTATGCTGCCAGGGCAGCCATTTTGTCTTAGGTTTTTTAGGATTGCCAAG  
CCGTCCCCTGCCTCGTCCCCGTCCTCCTCGTCTTGCACCCCCACCCCGATGCATGAAGTGCCTCATGGTGGCATGTTT  
AAGCTCCACCAGATCCTGGAAAACCGGATCACAGAAAACACAGCCGGTGTGTTGGGTCTCGCTGGCAGGAAGTGGAGT  
GCGTGTCTTGTGAAGTGCAGTGCAGACCAGAGAGGGCGTGCAGGCATCGCAGGTCTCCTGAGCAACCTGCACTCTGTG  
TGCATGTTCAAAGAAATGTACCACCACGTTGCATTTATTACAGGCCATTTCCATTTTGGTCCAGAGGTGGGATCCAG  
CACTAAGACTCCACCATCACACTCCACACACTGTCCAATGCCCAAAGAGTTGAGAGAGTGTGACAGGACGGATGAGT  
ACATTCATTGCATCCCATACCTTTTTTTCATGTCCCTAAAAGGCGGGTGTGCTAAAGCAGTAAGGGCACAGGGGGTGC  
TCTTGGCCCCGGGCCAGAGGTCCACAGCACAAAGCTCAAACCTATCCAGTGGACAGCGCAGCTCCTTGTACAGCTTGA  
TGGCTCCATTCGTGGAAGACTGTAGGTCTCGTACAGTGGGAGCAATGGAGCCTGCTGGGCTTGGCCTGAATGTACT  
TCATGAAGCGGTGGCACTTGGCACAGCGAGACAGGGGCTTTCCTGAGGCAGCAATGGGAGAAAAGGAGACCTCCATCA  
ACTCATCCATGCTGGTGTGGAATCCACAAAAGAGTGAACCTTCTCTTGAAGATATCCAGTGTATGCCCC

>Sequ07358SNP2

GCAGTGTGGCAAAAAGTATGTGTCAGTGTCAACCTTGCTTTTGACCAGTACATGCTTGTGCACCATGTATTGTCTTGCAG  
TGCAACCTCAAAGTTTTTCTCTAAGGAAACATTTTCAGTGTGATATGTTTAAAGCAGGTGGACACTGAACTGACTGATTT  
ATCATGAATCTGTGTCATAATGGCACTTGAAGTATTTCTTCATATCACCAGAGAGTTGAATTAAGTTTTTATACGTGTAA  
AATGTAAAATAACTGGGCTGTGTCAATTAATGGTTCTTTTACTGTGCAAGTGTGAGTGGTAGTCTCTTTCAGCATT  
ACACTTATTTCTATAGACCAACTGGTGAAACTGGAGAGAACATTAGTGTGTTTATTTATTTGTTGTGTGATGTTTTC  
TGCGTGGTTGGTCCCTGTATGAAAACAACATGGTGCCTTTTTCAGATGTTGTGCCTGACTGTTCTGACCTATTTCTGTGC  
AAAAAGACAAGAATATTCCTGAAGATGAACATGAATCCGAACAATCCGATTTTAAATTTTAAAAGAAACTGCCCGA  
GGTGTCTAATGTATTTTTTCCACTTAGTTTTTTGTCTTGTGCCAATGTGAGTTATAGTACCTCTTCTCTTATTTA  
ATGCTGTCTAACCCTGTTGCCTGTTTTGTGCACATTAATTTGTTAAATAACTATTTAACTGCACGTGAGTAAAAAGA  
AGACTGTGTTGCTAACATGGGCTCAACTTGATGGATGTGAACGTTTACACAATAAGCAGATGTTCTGTGCCCTGTGTT  
CTAATGATGTGTATATTTCTCATTCTTTCTTTGCTTTTTAAATATTACCCATATGTTCACTTTTTTTAAAGTTTCTTGC  
TTGCATTACCTATGCACATCTCAAAAATAAAATCTTTATTATGCATTTTGTGCATTTTTTAAACATTAATACATGATCTT  
GTATTGCACATACCTGGCAAAATACAAATCACAGCTGCTTCATTTGTTTAGTAGCAGGAATTCAGTCCAGTGTCAAAATG  
CCCAGGCCAGAAATTTTTTCTTAACTGTTTTTCACTGGTTCACAGAGGAGGCTGCTCTCAGGGCTCTTGGCGTCCACGT  
CTCCCCAGTAAGGCAGAATGAAGGGCAGGTTGGCCACTCGGCTCTCCAGCAGCCCCACAGGTGCTGGGCCACAACT  
GGTTTCCCTTCTCTGAGAGATGTAATCCGTGACACAAGTAGACTGTGTAGTCCGTGTCATCTTCTGTCATGAGTGTCC  
AGAGTCCAGGACATCTGTGCCACACTGACTGGCAGCCTGAACACAAGCCTGGGCATATGTTCACTTTTTTTAAAGTTTCTTGC  
GGCGATTGAGAGAAAATCCTTTCAAAATGCACCTGCTTCTCCAGGCTGGTTCATGGATAGGTGGGGGTGATGAAGAT  
AACTTTGTCTGCTGACACTCCAGCTGAAGCCAGAAAGCGGGTGTCTCCTTCAGTTCTCTGAATACTCCTGCAGAGG  
GATGTGCTGCTGGGGTTTTTATCTTCCAGTGAAGAGTCTGTTGGCTCCAAAGAAGACAGTGCAGCAGCTATGTTGTT  
GTCTGCTGAGCTCTGGCTGTTGATGAGGCGAGGAAGAACAATCTTACCCCATTTGGAGTTGTAGCCAGACAGCCCTCT  
GTTTACAACATCACACTTCTTGTCTAATTTGTCCGCAATTTCTGCACCCCATCCATGGGTGAAATGAAAACCTGTGT  
GATGGAGTCGCCAAATAAAATCACTTTAGGCCAAGTTACGGTTTTTGAACCTTAGACATCATGAGGCTATAAGTAGGAAC  
TTACGAACACACCCCTTCTGTT

>Sequ07368EST2

CACAGGCTTTTATTTTGCAAAAAGATAAACACAATTCAAAAGACAACAGTGATTCAAATTTGTCTGTGTGCGTAAATGA  
GTTTACATGGCTGAGTCTGAGCCAGTGGGTCGAGTCTCGGTCCAACAGAGAGAGCGACTCCCTCAACTTCTGC  
AGGAACCTCCTCAACTCCTCTTTGGAGAAAACCTGGTAGAGCCGGTGTGTTGTCAGATGAGATGATGTGAGCGAGTCCG  
AGCGCCTCCTGGTGTCTGGAGGAGTTCTGCAGCACACTGAGCAGCAAGAAGCTGAGGCGAGGACACAGAGAACGC  
AACGCTGCCATCTGGTGGCTGCGCTCTGAATCAGGCTCTGAATCCTGTCTGTGTCGACCATCCATCCTCCATCGACA  
AACAGCAGCAGTGTGATGATCTCTCCTTTCACATCTTCAGTCAGAAGCTCCAGACGGCAAGCAGACCAGGCGGACAGAGAA  
GTCTGGTACTCCTTTTCTCTCATCTCATTGGCTACCCCTCTGTGAATTTAGCTTCAGGGGCAGGTGCTGGCTTCTGA  
GGGCGGAGCTACTATGGCTGAACAGTCAAGTAAAGCCTCATGAGCTTCCAGGTACGCTGATACACAGGTTCTCT  
CTGATGAGGTTCTCTGCTCCTCAGCAGGTAAGGTGGTCTGACCGATCCCCGCCACTGGCAGCAAAATCCTTCAATGAA  
TCCTCTGGAACTTAGAGAACACCGCCTTAGCTGCGTCTGTGTTTCTGCAAGGCCAGAAACTTCTCATGATGGCGTTG  
GACTGTTTTCAGGGCTCGGCTCGATGGGCGGGGTCAAATAGCAGCCAGTCGATAACATCAATCTTCTTTGGTCCCTCC  
TTTGTAGTTGCCGTCTCCAGCGTCTGGTTGTGGTGTGTAACCTCAGTGTCTCTCTCCTTCCAGTCTCCACCACC  
AGCTTAGTTATCGCAGCAACATCCAGACCGGCTTCACTGGCGAGCTGCAGGCAGCGGGGGGAGCTCTGCCTGGGGT  
ACGGTCTCCAAGAAAGCAGCGTACTGAGCTGTGGCGAGCTCGGCCGGGAGCCCCG

>Sequ07377EST2

ATTACTTTTATTTCTGTACAGCATACCTTTTCTCCTTTTAGCAAATTTAAATGCAAAAACAATGCAAAAATACATTTGCC  
CACCTGAATTTATGACAGGTGCATCAGAGGACAACCTTGAAGAAAAGCGACAAAATCCTGCACACTGTTATGTGCTGC  
CGGTATATTTTCATATATCATTTCAACAGAAATCTTTTCACTTTTATTTAAGTCCAATCTTTAGCTGCAAAATACTGTGTG  
TATACATATTTCTTGTCTTCTGCCCTGTGTAAAAGTCTGTGGTGTGGTTTCAAGTACGGAATCTAAAACACACCTT  
TGGTGTGAGTTCTGGACTTCAGTAGGATGGATAAACAACAGCTCTTAAAGTCAAGTACAGTCTCTGTGCCAA  
CCTGCTGCCAATGGCCGAGTACTTTCACTGTTTTAATTCAGCCACTGTGACAGCGAACAGAATACAAGAGTTTACATG  
TGAATTACAAATGAGGATACATGTTTTTTCAGTTCTGGCTATTTACACAATGACCAAACCTTTCGAAAAGACACAACAA  
TACCTGCTCAATAGTGTGGTAGACTGGAGATGATTGGCCCATATCCAGGAGCCTTGTATACAGTTCAAACAGTGGT  
GCAGCCACCAGTTTATAGTTCTTGGGGACAGCAACAGCGCTTTTTCTGCACTGGACCAGGAACAGCTTCTTATGC  
TCCTTAGCTTGGTGTGAGCTGGAATATAGGGGTACTGTGGAGGCTCAAAGTTGGGGCGCCACAGTTGCCGATA  
CAGTCGTCAATCACCCAGTCTGCTTACCCCGCTGCTGCCCGGAGGATCTCTGTATCAGGCGTTTTTTCAGACCCCTC

ACCTCATCTTCTCCGGGACTCAGCTCTCCACCGGGCAGTTTTAAAGAAAGTGGTACCCAGCTGCAGGAGTAACACGTGA  
GGCAGCCTGTGTTTCATGGACAATGAGGACACCTTCCACAGTCTCCGCATTTCCATTTTATCAAACCTCCTCACGCATC  
CGCTGGAACCGGGCTGCCACTGAACTGTCTTCTCGTACAAAGGCTCCTTGGTGCCCGAATGTGTAGTTG

>Sequ07395EST2

ACTATAGGGTAGGTCCGGTTTTTTTTTTTTTTTTAGGTTTGTCTAACATTTTTATTTTCATGAATATTAATGTACTTACA  
GTTTTGTATAAAAAAATATAGCAAAAGCTAAAGGCCAAACAGCTGGCAAGAGGACCAATACTTAATCAGTCTGGGGGT  
GTAATGACAATGTCTCCCTATAACAGAGAGAAAGAAAGAGCTAAGTTTCAACAGGGAAGACAACACCTGGTCAAGTAC  
TGGGGAAAAGAAAAGACATTTATGCTTTTCCATGCATGCATAAATAGGAATGCAGGAAGCATAAATATGTACAGATGG  
GACTAAAAATAGAAACCGTGAATTTGGCGCTGTCAAGTCTCTTTCCAGTCAGATAACATATCAAATGCATACACCAT  
TTGCCTTCTGTTAATAAAAACTATAGAGGTATTGGTAAGCTCTTAAAGAACATCAGTTATGTTTTTATAGAAAGTGTA  
AATTAGTTGCTACATGAAAGTCAAAGGGGCTTTGGGAGGATGTGTGCCATTTGAAGCACTGAGGGATCAGTAACTGT  
ATGCTATGCGAGAGTTGAATGGCAAACCTTTCACAGTGTCACTAAAGGCATGTTTGTGTAAGAAAATAAATAATACG  
TCTGTAATGAGTGTAAGTTACACCACTCAATGTCAATGTAAATGAAGGCATCCCTTCTTAGTGCTCAACAGAAGCTG  
TAACGCTCTCTTTAGAGGGACATACAGGATGTTATGTTGTGTACACACTTTGTGCGAGCTTCAGCCTCTCCACATC  
AGTTTTGTCTGTAACCCCGCAGCCTCTGTCTCTAAGCATTCTGCATCTCTTTGCCGATCTTGTAGCTGAGGATCTT  
GTTCCAGTCGATCTTGGTGCGGGTGACCGGGAGCTGTCTACGTAAGGCTTTGAAGGTGGTGTCTGACATGGTCTGATA  
GTTCTCACTGATGGCCACCTGGTATTCATTCTCTGCATCCTCGATAATTTTACCAACTCCTTTGCAGTCTGGCTCTC  
ATTAGACACAGTCAGTGCTTCCCTGTACATCTTTGTGGCTGACCAGTTGCACATTTCCATCCTCATAAATAATGTACCTG  
TATTTTCAAGACTCCAACCACCTGTGCTGTGATTGCGAGACACTGAACTTCCATTCAGACCGGCAGCGACCGTTCCA  
GAAGTTTTTAGGCTCAAATGATGACCTCGATACAAGCATAAATGGTCTGCTGGCCATCAATCGTTTTCCATAAAC  
GGTGACAGACTCCAGTGGGGTAGTGCTCCTTGACATAGGCCCTCAGCGCAGAATCACAGGCGTCTCCTCAGCTGAG  
GGCTGACTCGCCCTCATGGGGCTGGGGGTGCTGGCCTCTTTCCCTCAGGTGGTCAAACCTGAAGGAGATTTTTATTGTG  
TGGGTCAAAGAAGCGGCCATTACCCAGATCTCCATGCTCTGTTATCAGGACCTGATCTTCATATCCATCAATTTTGGC  
AAGAGTGAAGTGCATCCATGTTGTACTGGGCAAAGGCGTGAGCCGCGCCCTCTCTGAGAAGATTATCATTATTAAGCAG  
CAGACGCACATCATTGAAGACTTCATTGAAGTCCCCTGGAGGAGCGTGCATCAAAAATTAGCTGCAATACGGATCTT  
CTCCTCATCGTGAGCTCTCGAAATCTGCCATCTTGGTTCAATGAAGTGTTAACAA

>Sequ07400EST2, Sequ07400SNP2

CAGTCTCGGTTTTTTTTTTTTTCTAGTCTTTTACATTTATTAAGAATGTAAAAAGAATAGCAGGGTATATATCCTTC  
CAAACGTAATGAAAAATCCAAACAGAGGCAGAATCTAGGCATGGGTGAGGGAAGAACTTGCTTCTCAGAACAGGAGT  
GCTGATCTAGAATCAGGTTGGCAATCCACAAAAACAGGATGTGTGAATAATGAAAAATATGAAGGGAGTAATTTGTGGA  
AAGCAGGAGAAGAGCATACATTTGAAATAAATGTAGACAGTCAACTGATATCAAAAAGGAAAAATCAGCTCCCCAGTAA  
AAGCTCACATAAGAGGCCACCTGAACAACCTCTGGATCAAAAACCTGTTTTAAGAACTTGATGTAAAAGGGCCAA  
ACCAACAGTGTGAATGTGGAAGAAGACAGACCAAAGAAGAAAGCAGATGGAAAGATCATTTTTACTCCTCAGTCTTTCC  
TCAAAGGTACAGTCTGCTCATTAAATGCCCTCCTTAGTGATGACGCAGACCCGAAGGCATCCCCGGTGTAGACATCTC  
TCTCTGCAGCTGAGATGAAGACATCTTTGACCAGCTGAACCGCCTTGCTCAGTGCAGAGGGACATGCTGCACACCCCT  
CCATGTTCTTAAAACCAATCTGGTTGTCAAGCAGTGGCTGCAGCATGGCACTTGCCGATCCTCCAGCCTTGTAGGTGT  
CTCTCTGGTAAAGGCCACTGGGTCAAACACTGTACACTGCTCCCTTGCCCTCTTCATCCAGTCCCTCAATGATGTTGT  
AGACGTAGTAGGGGAAGAACCTCCTGTGATAGGATGGTAGACAACATGGCTGCGATGGCTCCGCTGGTCAATTTGTCT  
TGTGTTTTGAATGTTTGTACATCTTTAATCTGGCATCAATGATTTTTGGTGCAGAGTCAGGCAGTCCGATGGAACCGC  
TGCATCCAATGACGTTGTGTCTGTGACGTTGTAGCATTTTTGGTGAGTCCCGCTGTGGATTGAGTAGCCTTCACTCA  
GCCTGGTGTCTGAGGCTACGATGGCGAAGTCTTCCCCGGCAACCGCTAGTACAGTTCTCCGTTGAAAGCGTACGGTG  
AGAACCGGTGCTTACCGGACCGGTATAATGATATTCTTTTATCTTCCAGAGTCTCCAAAAGTCTGCGCAGAGAGCA  
TCTTTGTTACGGATAGACAACAGTGTTCAGCTTTCTGCCAGGTAAGTTCGCTGTATCACTGCAATATGGCAGCTTCTT  
CTTTACTTCTCC

>Sequ07451EST2

GTCCCAGATCCGTGAGAAGATTGTTTCAGCAAGAAGTGGTAAAGATGGAAGAAGACCCTCTCCTCAGGTCAGAGTGTGA  
CACCTTCTCACAAAACATCAGCACTGAGCAGAAACACAAGAGAGCCTGAAAACAGAGCTCTTCCAAGTCAAAGACA  
GAAGGCTGACCTGGATCTGCAACTAGAGGAACACTAGAGCGTGAGCGCAAGGCAAGGCGTATGACAGAATGGAGATCCA  
AAGGCTTCAATCAGACTTAATGAACCTGGAGTCCCGTGACAAAGAGAACCCTGAGAAGGTGACAGTCAAACAGAAGGT  
AGTGCTGCAGCAGGATCCCCAGCAGGAGAAGGAACACTCCATCCTTAGACTACAGCTCGATGAAGAGAGGCACAAACG  
CACCTGCTTGAGAAGGAGTTGAATGCCCTGATCCAGCAGCAACTCACCTGGAGAAGATGGATGTGAAGGAAAGAGT  
TGTCCGCACTGAGAAAGTTCAAGTTGAAAGGGACCCAGAAGCTGAGATTGAGATTGAGAACCTAAGGAGGACTCTGGA  
AGAGGAGAAAAGGAGAAGACGAGAACCTTGACCAGGAGCTGTCCATCCTCACTTCCAGGCTCTCAGATATGGAGTTCTC  
TAACACCAAGTCTTCTAAAGAAGTGGACTACATCCGTGATGAAAGTAGCCGTCTGCAGCAAGAAAACCAAAGGATGCA  
GAACGAGATCCGCAACTGCGTTCTGAGATCGATATCACAGCAAAGAGACTCGGATTATTACTGAGTCAGCACCAAG  
GGAAGATGGAAGAAGCTGGAGTTGAGGCTTGATTATTACAGAGGGAACTCGCAAGACTCAGAGGCATAACTATCCA  
AAAAGATGAGGAAAATCGATAAGCTTCAAAGAAGCTGTGCGGAGTGAATAAAGAGGGAGCAGAGGGAGAGCCATCT  
CCGTCGATCTATCGTCTGATCCAGATACAGGCAAGGAGATGCGACCAGAGGAGGCGTACAAGCTAGGGCTGAT  
CGACTGGAAGATGTTCTGTAACCTGCAGAGCCAGGAGTGTGACTGGGAGGAGATCAGAGTGAAGGGTCCCAAAGGAGA  
ATCTCGGTTCTTACAGACAGAAAATCAGGGAAAAAGTTCTCCATTGATGATGCGTGTGCGTCTTGGGCACATCACAAA  
TCGCCAGCTTACAGACTACATAAACAAGAAATCTCCATCCAGGAGTTTGGTGAATGGTGTGCGGCAAAAAAATAAGT  
AAATGTAAGAAAATGCATTTTTGGTTTTGACTGTAAAAGCTTTAATCTGTTTTCATCTGTGTTGTTTTAACTCTCCTTG  
CTTTTTATTGTACTTCTGCTCTGACTTCAATTTCTTTGGTGATTTGGCATTATTTTGTACTTTATCCACGATTCGTA  
TGCATATGATTTATTTGCTTATTTCATATTTAGTTTTGTGGGACTGGCATGGATATCTGGATTAATATTACTATCGT  
TACAGCCAACATACATAACACTTACAGATAACACTGTGGTAGGAAAAGTTTGTCTCAGCTGAGCCTTAATTTCTTAGACT  
GGGTACGAGGGTGGAGAATATATCTTTGATTTGATATTTGATTCATTGAAATTCACAAAGGTAATAATGTTTCATTTATT  
TGTGGGGTTTTCCAGGTTTATCTGATGTGTGCTCTCAAGCTTCAATAAAAAGTCAAATCAAACCAAAAAA

AAAAAAAAACCGAACCTACCCTAACTAAGT

>Sequ07494SNP2

TGCTGCTTTGGTTTAGGAGCTGATCAACCAAATAGAGAAGGAAATAGGAAGCTAATGAGTTTCATTGCTTTTGTGTAT  
GTACTGTATGTTCTGTGGTGCTTTGTTCGAGGACCCGGGGGATTTTAAATGAGAGTTGTGTATGTTTGTCAATAGAAT  
ATGCGAGAAGAAAATGAAGGCTGGGGTTTATCTTATTTAAACAATCACTGTATGTTGTAGTATGTTTGTCTCAGTCTG  
CAGATTTATATTCATTCAGCAGTAGCAGCAGCAGGAGGGCGGTTGGGATGACGTGTTTGCCTGTAAGCTCCTGTAGCC  
TTCATGTTTTTCATGTATGTTTTCAGTGTAGAAAACCTCTCCACACTCTTCCACTTCATTATATTCAGGGCCTGTTGTGC  
TTTAGAGCCAAATATGAGTTCAACTTTTGTACGCATGGGGGCACTTTGTGTGTATGGGTCTATATTTTTTGTACCATT  
TTGAAGTGCACATCTTTTCAGCATTCAAAAATATTCAGTTGCAGGATTTTGTGTTATAGAAAATAATCAACCCATAAAT  
CATTTATTAGCCGGTCAGATTACCTCGTGATTGTGAGATGGAGGAAAAATAGAACGATTTATAACTCCATGTCTTAC  
ACTGAGAAGAGCAGCTTCTGATGTGCTGTTTAAATGTTTCTACATTGTTCTTTTAGCCATGAATACATGGGTTTTAA  
TTAGAAAAGAACAAAGCGGTTTTTAGCTGAAATGTTTTCTTTTGTAGTTTGCAAATGAACACAGCCCACTGGTTATTC  
ATTGTTTTTCATGCAAAAACAGAAAAATCCTCAAGCACTCAACTAAACACTGCAGTTCTAATAAATGTCCCATGATCTCA  
TATTTCTCATCAATTTGGCATGATATCAATGGTACGTGCAATAAAAACACTAGTATTCGTATAGATCAGTGTAAATGTATTGT  
AGAAGCCATTTTGTTTTGTTCAGTTTTAGTGCCTTTAATGAAAATCAAAATAACATTGCTGAATTTGAAGAAATGCATTT  
GTGTGGCCAAATATGGTCAAAAACACTACAAAGCTCAGATTAATAAAAAACTTTTACAAACAAAAA

>Sequ07802SNP2

GTATCGTGGCGTTTGTGATGTGTTTAGATTTCTCTTGGACTTCCACAGTTAAGCTGTTACCTGATAACTGTCATTT  
CTGCTTTACTTGATCTCATTTTTTGGCCGTCAAATTAATAAACCACCGGGCAGTATTTCCCTTAGCGGGTCAAGATG  
AGGCGCTCGGTTTGGGTGAAGGAGGCTCTGGGAATTTATGTGGCAAGTGGATACAGTATGCATGAAGAGGAAAAATGAA  
CATCTACAGGAGGGACTGAGAGCCAAAGTCAACGCTTTGAAAAGTCTGTCTATTGACATTGGAACGGAAGTGAATAC  
CAGAATAAATGCTGGATGATATGGACACAGACTTTGACTCAACAGGCGGCTGCTTGGTGCCACCATTGGCAGAGTG  
AAGCAGCTATCCAGAGGCACTCAAACCAAACCTTTTGTGCTACATGCTCCTTCTGCTTTTTCGTCTTCTTCATCCTG  
TACTGGTTCATCAAGCTGAGGTGATAAGAGGATCCTCCTGGATTTGGCCCTTTTAACTTCACATCTTCTCCTCCAGCT  
TGTGCCATTTGATGATATCTCGAAACTAGACCAACATAACGATGATGAGGAAAGGCAGGATTTTTGTGTCTCAGCTTT  
ACTGGTTCTGTGAGCACTTCATACAATGACCCCAAAATCAAAATTTAGTTCATGACAGGAATCTTGTGATGCTATTT  
GATGGAGTCTTAACACATTACAACCTTGTGCAAAAAGGTCGAGCTGACTAATGATCACGTGGAGGTATCATATATACCA  
TAAGTAGACAGTGCCAGTATTTGTATGTACATGATATCAGCCCAATTCACCTGAATTGAGAAGATGCATCATAACATT  
AAACATAACTGGAGAACATACTACTGTGTCAAGAATCTTAAAGCAGTAGTGTGCATATTGAATGGTAAACAGCAACAA  
ATCTGTGGATTCTTTATCAAACCACTCCCGTGTCAAAAAGTGAATTAAGTTATAGAATGCTAGTGAAACAAAATAATTG  
TATTTGCTTTTTAAGAAATGAATGGAATATTTACAGCATTCTCATTACATACAAAATGATTAATAGCAGTGTACGTCATTA  
CCGTTTTAAATTTTGTGTGTA AAAATGTTTTTAAATGTAATAAAGACATTTTAAAGCTACTAG

>Sequ07879SNP2

TAGCTGTGCTGCAACTAATATGGAAGTAAACCAAATATCTCCTGCCTAACGGATGACATAGCTGACATGTCTTGGGG  
GCTTGGAGACCAAGCAGCAGCTGTTGAAGCCAAATGCAAAACAGAACATGCAGGATTTGATTTCACTTTGGGTATATTA  
ACAGCCATAATCAACAGTTGGTTTTCTGGGTTCTCAGTACATCGTGAACCTGACCAGTATAATTTACAAGAATGT  
TGATTTCTTCAACTTGAATTTTGTGGCATAAGCCAAATGACAAAACCTGTAGAAACATGAATTTTTTCTTAATGA  
AAACCTTTATTAAGCCCTGACATTGGAGGCAGTTATGGAACGCTGTTGAAATCGCCTGAATCCTGCACATAGCTTT  
TGCATGCTCAAATGCTTGTAGTATAGAACATTCATTGCTTTGACTCTCATCTACACAGCACACCTGTAGCTGATATTT  
GGCAGAGGTGTATGATGTTTTGTTAGTATAGATTCAAGGTGTGTGCTGAGGAACCCAGGCTGCAGCAGTAACCTACCA  
GCATGACGTGGACTGTTGTAAGTTTACGAGTCTTGGACCTTTTTTTTTTCCCTCATCTGGTGGATGTGATCAGTGGT  
TCAAGGAAGGCATCAATGCAGAGTGACATCAGTCCAGAACCTGTCATCGTCTCCTCCATCTATAAGTTTTTCTTTATTT  
TTCCCATTTATATACCCCTTCCCACATGTCTACCAGCCCTGACCTACCCCTATGTTTTTGGTTTTTACATGTAAGT  
TATGGACTTTGGGGGAAAAAAAAAACTTATTTACAGTGTAAAGATGGGTTGATATCCACTGACAAAATGTGAACGCT  
TTGATTTATAAAAGCAAACCTGATCAGTGGAAAGGATGAAATGAATAAATGTAATAAATAAAGCATCATTACAGAAAGA  
TCAATATGTTTGCACATAAAGGGACTGGCAGGCAAGCAGTTTTTGTTCATTTGCTTTTTTCTTTTGGACGGTGTA  
TGTGCTAAAGCTGTGTTTTGTACAGTTTTCAGAAAAGCAAACCTGGTTATATACATATGTTTTTTTTCTTTTTTACAGC  
AGGGGATGCAGACTTGATTTCAAACATTTTAGGGTTGCAATTTGTTTACTGTTTGTAGTCTGCACGTGTTTCATG  
TCCAATCCAATTTTATTCAATAATAAATGAGTTATG

>Sequ07939EST2

GGGCGAGCGGGGAGCTTCTACCAGAATAACCATGAAAGCTTTTCTTTCGACAGAGATCCTCAGCTGTACTTTCGATGAT  
ACCTGTGTGGTCCCTGAAAAGATTAGAGGGCAAAGTGAACAGGAGCCCTCTGTGTATCGTGACGGACCTCCTTACCAG  
CGCCGGCTCCCTGCAGCTCTGGCAGTTCTTGGTCACTTTACTGGACGACCCAGCCAACGGCCACTTCATAGCCTGG  
ACCGGTCGTGGCATGGAGTTCAAACCTCATCGAGCCGAGGAGGTGGCTCGTTCGCTGGGGAATCCAGAAGAACAGGCCG  
GCGATGAACTACGACAAGCTGAGCCGCTCGCTGCGTTACTACTACGAGAAGGGCATCATGCAGAAGGTGGCCGGTGAG  
AGGTACGTGTACAAGTTCGTGTGCGACCCCGAGGCTCTCTTCTCCATGGCGTTCCCGACAACCCAGAGGCCCAACCTG  
AAGGCCGACCCGACAGTCTGCCGGGGCTGGACGAAGACACCGTGCCTTCAACCTTACGACGAAAGCGCTCCCTAC  
CTGCTGGACGGCGGGGAGCAGTGCCTGGCGGGCTTGGCGTTTCCAGACGGATACGGCTACTAAACGAGCGCGCAGGGG  
CGTTTCTGACGCCAACAAACACACATGTACACGCAAAAAAAAAAAAAAAAAACAAAAAAAAAAAAAAAAAACTAAGAGACTAG  
CGAACGACGACACAGGAGTAG

>Sequ07985EST2

ATCTGGCACAACAACGAGAAGACCTTCTGATCTGGGTGAACGAGGAGGACCACACCAGAGTCATCTCCATGGAGAAG  
GGAGGCAACATGAAGAGGGTGTGTTGAGAGGTTCTGCAGAGGACTCAAGCAGGTGGAGCATCTGATCCAGGAGAGAGGG  
TGGGAGTTCATGTGGAACGAGCGCTCTGGGCTACGTCCTCAGTCTCCCTCAACTTGGGCAACCGCCCTCAGGGCGGGT  
GTGCACGTACGCTGCCAAAGCTCAGCAAGGACTCACGATTTCTCAAGATCCTGGACAACCTGCGGCTGCAGAAGAGA

GGCACAGGAGGAGTGGACACCGCCGCCACCGGAGACACCTTCGACATTTCCAACAACGACCGTCTGGGCAAGTCTGAG  
GTGGAGCTGGTGCAGCTGCTGGTTCGACGGAGTCAACTACCTGATTGAGTGTGAGAAGAGGCTGGAGAAGGGCCAGGAC  
ATCAAAGTCCCGGCTCCCATCACTCAGTTCAGGAAGTAAAGAGCTGGACTCATGATGCCGTGACGGTTGGCAGGAGGT  
CAGTCTCTGCTGCTGCTCCCTCCCTCCCAAACCGAGCCCGGAGAAAACCTCAGAACGACGCTCGGTCCGCCGCCACAG  
AGGAGGCTGCTTCTTTACACCTCCCTCACTAAGATTTCAAATCTTTAGTGTAGCCTAAACTTAGACATGGTCTGCTGT  
TAGGGGAAAATTTACTACCTAAGTTAAGGTCTTCCGTGTAACCCTGACTCCAATAAAGCCGACAGTAT

>Sequ08061SNP2

GCTGTCTGCAGGAGCCCAAAGACACAATGTTGTTCCACGTCTTCCCTCCTGTTGGCGGGCGACTAACGCCGCCTTCAGCT  
TTGACGACAGGATCGTCGGGGGTTACGAGTGTAGACCTCACTCCGTCCCCGAGGTGTCGCTCAACAACGGCTGGC  
ACTTCTGCGGAGGAACCTGATCAACAGCCGCTGGGTGCTCAGTGTGCTCACTGCTATAAGGATGAGAACATTGAGC  
TGCCTTTGGGTGAGCACCACATTCGCTACAAGGACGGCCCCGAGCAGTTCATCGCCGCTGCTGCCGTGCTCCGCCACC  
CCGAGTACGACCGTTACACCATCAACAACGACATCATGATGATCAAACGAGCGGCGGAGGCTTAATGAGTCCG  
TGCAGCCGGTGTCCCTGCCAGCAGATGTGCCCTGCAGGGACCCAGTGTCTGGTGTGAGGGTGGGGGCCACTCAGAG  
TCCCTTCGGATGTCTGAAGTGTCTTCACTGCCTGGACCTGCCCGTCTGTCCAGCAGGACTGTGAGCGCTCCTACCC  
CGACAGGATCACCGCCCATGTTCTGTGCCGGCTTCTGTGGGGAGGAAAGGACTCCTGCCAGGGAGACTCTGGGGG  
TCCTCTGGTGTGTAACGGCGAGCTGCAGGGGGTGGTGTCTGGGGATGGGGCTGTGCTGAGGTGAATCGTCCCGGAGT  
CTACGCCAAGGTCTGCCACTTCTCTGACTGGATCCAGTCCACCATGTCCTCTCACTGACGCTCCTCTGCAGAGGACAG  
ATCCACTCTGTCTGCAGCTGCTGTCCATTTTCATGTATCACACTGACTCTTTATAAGAGGAACATATTTTACTGCTTTG  
TTAAGCAGCTGTTGACTGTTTACTGTTTGTGGATCATGTTTTTAACAATGACAGTAAAAATATCACCATGAACAACCT  
AACAAAAAAAAAAAAA

>Sequ08137EST2

TCAACAACCTGAAGTCCAGGAGCGTCAGAACAGAGTCTGCACGACCGTGGCCATCGCCATCGTCGCCGAGACCTGTT  
CGCCGTTACGGTGTGCCGGCGCTCATGAACGAATACCGCGTGGCCGAGCTCAACGTGCAGAACGGCGTGTCAAGT  
CCCTCTCCTTCTGTTCCAGTAATCGGAGAGATGGGCAAAGACTACATCTACGCTGTACGCGGCTGCTGGAGGACGC  
GCTCATGGACAGAGACCTGGTCCACAGACAGACCGCCAGCGCGTCCAGCAGTGTCTCTGGGCGTCTACGGTTTT  
CGGATCGGAAGACTCGCTCAACCACCTGCTGAACCTACGTGTGGGCCAATGTATTCGAGACGTCGCCCTCACGTGATCCA  
GGCGGTGATGGGCGCCCTGGAGGGGCTGAGGGTGGCCATCGGACCCCTGCCGATGTTGAGTACTGCTTACAGGGTTTT  
GTTCCATCCGGCCAGGAAGGTGAGAGACGCTACTGGAAGATCTACAACCTCATCTACATCGGCTCACAAGACGCCCT  
CATCGCCCATTACCACAAGTCAACAACGACGAGAAAAACATTTACGTCGCTACGAGCTCGAGTACGCTTTGTAAT  
ACAAATTTGTGTGGTCTTTGTTTTTCTCCTCCCTCGACCATCACCCCTCCTCCGGCATCCATCTCTCTCTCTCTCT  
TCTCTTTCTCGTTTTAGGACTGAGTCACTGTTTTATTTAGCGGTGATGTCGGTCTGAACAGTCCGTTGCTCTGAATGC  
CACTTATTGATCCTTGATTGAAAGTGAAGTGAATATTAGGGGAAATAAAAGAAGAACATTGTGGCGTCTGTATGTAT  
TTTTTTAATTTCTTTGTTTGGTTCCTGTGAGGAATGGTTTTAAGGTCCGATGAGCCTTGGTAGAGGAATGCAGCGC  
AGTCATGACAATGTTTTTAAAGATTTGGAATTTTTTTTTGTTTTTTTTGTTCTTTGTGTATTGATAGGCTCCTGTATCA  
GCTGTACACACCTCTCCATGTTTACACCTCCTCTGTTCTTATTAGATTGTTGCTTTATTTAACCAAATAAAATGTT  
TGTGTATAAAAATCAACTGCGTGTCAAGTTTTGTTTAGTCAAAGTAATTTAAGGGTCCGACAACCAGCTGAAGCCCTC  
GCCTGCTGCACTGCAACGTTC

>Sequ08208EST2

GTCATCCAGAAGCTGTGAAAAGACTCTGGTGTGCAGGCCGGCTTTGATAGAGCTGCTGAGTACCAACTGAACGACTCT  
GCTGGCTACTACCTCAATGAAATGGACAGAATCTGCAAGCCTGATTACCTCCCACTGAGCAGGACGCTGCTGCGATCT  
CGAGTCAAAAACAACTGGTATCATTGAAGAACAGTCTCTCGTCAAGAGCTGCACTTCAGGATGTTTACGCTGGGTGGC  
CAGAGTTCAGAGAAAAGAAGTGGATTCACTGTTTCGAAGGTGTACCTGTATCATCTTCAATTGCTGCTTTGAGCGCC  
TACGACATGGTCTGGTGGAGGATGATGAAGTGAATCGAATGCACGAGAGTCTGCACTTGTTCACAGTATCTGCAAC  
CACCGCTACTTCGCCACCACCTCCATCGTACTCTTCTCAACAAAAAAGACGTGTTGTTGAGAAGATCAAGAAAGCT  
CATCTCAGCATGTGCTTCCCTGAATACGATGGACCCAACACCTACGAGGATGCTGGAAACTACATCAAAATGCAGTTT  
TTGGACCTGAACCTGCGCCGAGACGTCAAAGAAATCTACTCTCACATGACCTGTGCCACAGACACAGAAAACGTCAG  
TTTGTGTTGATGCCGTAACCGACATCATCAAAAGAAAACCTGAAAGATTGTGGTCTCTTCTAAGAGCCACGCTCA  
GGACCCAATGACGGGTGCTGTTGTCGCCCCGTGACACTCCAAAATCCCTCCTCAATTGAAGCTGAGGACCCCAAGT  
GAGAAAATGGTCTCCCGAAAATATCAATTTCTCAACAGGCGAACGAAAAGAAAATAAAAAATCAATTTGTTGTTCAAAA  
AAAGTTGTAGCTTTGACCAAAAGACTTCAGGTCAACTCAGACCAGAAGACAGCTCAGATTAAGTCAAGAACTTCTGTGC  
AGATTTTCAAGTGAAGTGAAGTGAAGTGAAGTGAAGTGAAGTGAAGTGAAGTGAAGTGAAGTGAAGTGAAGTGAAGT  
ATCTGTAGTTAACACATCAAAAGCTTCTGTGACGATAAAGTGAATTTCTTCTCACATGTATTAATGTGAATAGATGTCA  
GGCTAACGCATTCGCTCTATGCTCCAGTAACTGGTCAAGTATATACCGCAAAAAAATAAAATAAAATAAAATGCA  
AAACAAGATGGCTCACACCTGCAACGCACTTCGACCTCTGTTAGAGATTTAAAAAACTTGTCACTAGAAACACC  
ACAGAGCAGTTTGAACACAACCTCAGGCAGGTTACTCACTGAATTTTTTAAGTAAGAAAATTTAAACTTTTTTTTTTTT

>Sequ08248EST2

CCAGAGACGGGACGACATGAATCCAAGATGATCGAGAAACACGGCGGTACAAGTTCACGGCGCCAGTGGTGCCATC  
TACTTTCAACTTTTGGAGGCACTGCTCCAGGAATGAATGAGTCACTGTTCTACTTTTTATTACTCTGTGACTGATT  
GTAGTGAAGTGAAAAAAGCTTGTGTTTCCCTTAAGTAGTGGTTCAGAACTGGTCTTCTCAGTCACTTCTTCAAT  
CTGTCAAATGGGAAATAGCACCAGAAGATGGGAAAGCAACAAAATGCAACCAATGGCTGGGGAACCAACCAAG  
AACTTGAGCAGATGCAAGAGAAGGCTCTGAACAACGTTGTCTTCTGGAGCCAGTGTGGAGGGGATACCATGACG  
GCAACTCTTTTGTTTTTTCCCACTTAAACAAAATTTGGGGGATTAACAGTTAGAAATTTGATAATGGGACTAAATATTT  
CATTATCACTGTTGTGGCCAAATGGCCGTAATAAGATTATACCTCTGGTAGTGGTATATCTACGTTATTTTCTGCAT  
AAACTCATGTTTATGTACATACAAGCCAAGGTTATTGATTTTTCAAGTAGCCTTGA AAAACAACAGAGGCATTTG  
TAAGGTGTCAACAGCTGATTATGATGATGATGATGATGATGATGATGATGATGATGATGATGATGATGATGATGAT  
AATGACTAGCACTTTCATATTGTTTCCAGTCTCCTAGCCTTCTGTATCAGACTGCAAAATTTTTTAAATTTGAAGACTATT

TAAAATGAAAACAGCTGTAAC TTTGTTACTTAGCAAGCGACTTCTGTAATGACTGGTTGTCACGCATCTGGTTACAGA  
GTGGATCAGTGGGCAACTCGGAAACATTGATTTTCAGGAAAAAGAGAATGCTCTTGGTGTTCAGTATGGCTACAGGACA  
TGTGTTTGTGAGCACTGAAAGTACAATTGGATACATCATTGAAGCATGTACAATTGGACTTATCGTGGAGGTCTCAAG  
CTTTTGGTTGGTGATGGATGAACCATCTATATATAACAACAATAATTA AAAAAAAAAAAG

>Sequ08425SNP2

TCATATTGTGATAGTTTGGACTCTGATCTGTCTGACTCTGACTCGTCTCGGCCTGGTAGCTGTCTGGACTCGGACTC  
GTCTGAGTGTGTGGGGTTTTTAATTCGGGCTTGTAAGAGACAGACTTGT TTTGGTCTCATACCCGTCTGGACTCTT  
GAGTCTTGTGGCGTTTTGACCTGGATTTGTTCTGACTCGGACTCGTCTGGATCTTGTGAATGTTGACGCTGAGACTT  
GTAACGAGTCTCTCACGTGTCTGACTCAGTCCGGTCGTGGTGTAACGGATGTTTGGACTGTTTTCTGTCTCGGCC  
ACGAGTCTGACCTGTTACAGGCTGCTGTGAGTCAAGTGTAAAGTGGTATCAACTGCATTTATTCAGCATATAAGTAGA  
TTAGAACTACTACATAAATCTTAGCTTGTGCACTTTTTTAATAGTTTTAACTATTTTAAATAATAAAAAAAAAAAAA  
TTGAATTATCTGTACATGTTTTAAGGATGCCAGACACCCTCCAGTCAATCCAGGGTCAGTCATGTGATCACGAGGG  
GTTTCATGTAGAAGGTAATCTCTTGCACATGGTCACTTGGAAAGGAACTTAATGCTGACAGGTGATTTATTTTC  
AAGTGTGAATTTTCTGTAAACAGTCCCGTCTTTGTTCTTCAGCTGTCTGAGTGTCTGTTACGCTCTGCTTCTCA  
AACACATCCATTAGTCTGCTCCCGTCTCATCGTTCCCTCAGGAAGACCTGAGCTTCAATCGTAGCTATGAATTTG  
TATTTTTACTTATACTAATTTCCAGCAAT

>Sequ08460EST2

GACTGACGGTGTCTTTTCGTTCCATTTGTTTGGAGCGTACCGACGCACAGCTGGCTTCATATAGCGCTGTAGGGAAAGCC  
AAGATGGTGAAGGATCCAAAGAAGCCGAGGGGCAAAATGTCTCATATGCTTACTTTGTGCAAACATGCCGAGAGGAG  
CACAAGAAGAAACATCCTGATGCCAGTGTCAACTTTGCAGATTTCCAAAGAAATGCTCTGAGCGATGGAAGACAATG  
TCACCGAAAGAGAAAGGCAAGTTTGAAGATATGGCCAAACAAGACAAGGTGCGTTATGAGAGGGAAATGAAGAATTAC  
ATTCCCCCAAGGGCCAAAAGAAGCGATTCAAGGACCCCAATGCCCCAAAGAGACCACCGTCTGCATTCTTCCCTA  
TTCTGTGCAGACTTCGCCCCAAAGGTAAAAGGTGAGACTCCTGGACTCTCCATCGGAGACACAGCAAAGAAGTTGGGA  
GAGATGTGGAATAGCTCATCTGCAGAGGACAAGCAGCCGATGAGAAGAAGGCTGCCAAGTTGAAGGAGAAATACGAC  
AAGGATATTGTTGCTTACCGCACGAAGGGCAAGTGGATTCTGCTGCTGCTGCGGCAGACGATGATGAGGAAGAC  
GAAGAAGATGAGGGAGAGGAGGATGACGATGACGATGAGGACGACGATGACGAGTAGATTGCATCGAAATGGGACCTG  
AAGTTTTGTTTTATGCCATATAACCTAATATACTCAATTCACCATCTTGAACAAGTCAGATTGAACAAGAACATGTG  
TATATTTAATGTTTTAACATGTACAGTGTATGCTCCTTTTTTTGTAAAGTTAACTACATATCTTAAGTTGAGAT  
TTTCTAGTGGTAGTCTTTATCCCTGCCATATTCTGTAACAATTTAGGAGGACTACAAATCAGTATGAAAGTAATTAG  
TCGATAGGTGTTACAAC TCAAAAATGAGATTTCTGAGTTGGTAGTGTATTTTTCTTTATTTTTGAAAAATATTTTTTTA  
TGTGCTGTCCCAATGTCTTTTTATTGTTCTTTGAATACCACTCTAATATCAAATGCAGCTGTGCGACATTCAAGAATGT  
CTTCAATAAAGGTGCTTTTTTTTTTAAAGAACGAAAAAAAAAAACC GAAACCTCCCTAATAGT

>Sequ08562EST2

TCTCACTCGTCAGGGGCGACGTCAACCTGCTGATGCTGGGAGATCCTGGTACAGCCAAGTCTCAGCTGCTCAAGTTCCG  
TGGAGAGATGCTCACCTATCGGGGTTTACACCTCGGGTAAAGGCAGGTCAGCCGGTCTGACCGCCTCCGTGCTGA  
GGGACCCCAACACTCGTGGATTATCATATGGGAGGGGGGGCCATGGTGTGCTGAGCGCGGAGTCTGATGCATCGAT  
GAGTTTTGACAAGATGAGAGAGGACGACAGAGTGGCAATCCACAGGCCATGGAGCAGCAGACCATCTCCATCGTAAG  
GCTGGCATCACACCACGCTGAACTCCCGCTGCTCGGTCTCGCCGCCGCTAACTCCGTGTTCCGGCCGCTGGGACGAC  
ACAAAGGGGGAGGACAACATCGACTTCATGCCACCATCTTGTCCCGTTTCGACATGATCTTCATCATCAAAGACCAG  
CACGACCAGCAGAGAGACATGACTCTGGCTCGTACGATGAACGTCCACCTCAGCGCCCGGACGACAGCCGAGGGT  
GTTGAGGGCGAGATCCCGCTGGCCACCTTTAAGAAATACATCGCCTACTCCAGAGCTAAGTGCAGCCCTCGGCTCTCC  
GCGGCGGCTGCTGAGAAGCTGAAGAACAGATACGTGGTGTGATGAGGAGCGGAGCGAGGGAGCACGAAAGAGAGAGCGAC  
AAGAGACCTCCATCCCATCACCGTCAAGCAGCTGGAGGCGGTGCTGCTATCGCAGAGTCTCTGGCTAAGATGAAG  
CTGCAGGCGGTGGCTGGAGAGGAAGAGGTGGACGAGGCTCTCAGACTCTTCCAGGTTTCTACACTGGAAGCTGCGCTG  
TCGGGAAGCCTGTCAGGAGTGGAGGGCTTACCTCGCAGGAGGACCAGGAAATGGTCTCGCGCTCGAGAAGCAGCTG  
AAGAGACGCTTCGCTATCGGCTCCAGGTGTCCGAGCACAGCATCGTCCAGGACTTCACCAAACAGAAGTATCCAGAG  
CAGGCCATCTACAAAGTGTGACCTGATGCTGAGGCGGGGGAGCTGCAGCACCGCATGCAGAGGAAAGTGTCTCTAC  
AGTCAAGTAGAGCTAACCGTGTCTCCGATACTTCCGTACTGTTGTTGATGTAATAGTTTTTTTTCTCTGCATATT  
TGTGCTGCTGTATTTTACCAATAACAATAATTAATTTCAAACCTGGGATGAGTTGAGTTGGATCTGGATTCTTCT  
CTCGTCTGCTCACATGCTCCAG

>Sequ08564EST2

AAACACAAATCTTCATTCACCAAGATGGCGACATTGACAGTGAGCCGGCCACCGATCGCGGGTTTCAGTTTCGAAAAC  
TGCAAGAGAAATGCAGTCTTGAAGGCGAAGTTAACAAAGTGGGATGCAGTTTACCTGCTCGTAAAACAGGAACT  
ACCATCTGCGGTGTGTCTTCAAGGATGGCATTGTCTGGGAGCTGACACCAGAGCCACTGAGGGCATGGTGGTGGCA  
GACAAGAATGCTCCAAGATCCACTACATCTCCCCAACATTTACTGTTGTGGAGCAGGAACAGCTGCAGACACAGAG  
ATGACCACACAGATCATCTCTCCAACCTGGAGCTGCACTCGCTCTCCACCGGCAGGCTGCCACGTGTGGCCACCGCT  
AACCGCATGCTCAAACAGATGCTGTTTCAAGGATCAGGGCTACATCGGAGCTGCTCTGGTCTGGGTGGAGTGGACTGT  
AACGGACCTCACCTTTACAGTATCTACCCTCACGGCTCCACTGACAAGCTGCCCTACGTCACCATGGGCTCCGGTCT  
CTGGCTGCTATGGCCGTGTTTGAAGACCGCTACAAGCTGACATGAGGAGGAGGAGGACCCAAAGCGGCTGGTGGTAC  
GCCATCGTGCAGGTATCTTCAATGACCTGGGCTCTGGCAGCAACATCGACCTGTGTGTCATCTCCAAGGGCAAAGTG  
GACTACATCCGGCCCCACGATGAGGCCAACAAAGAAGGGGGTCAAGTGGTGACTACAAAGTACAAACGAGGAACCACC  
AGTGTGTTGACGAAGAAGGTGACCCCCCTGGACCTGGAGGTGGTGGATGAATCTGTACAGACTATGGATACGTCCTAA  
AATACTTTGACCATGTTTTCTTGGATGTAACCTACCACCCGTCAGAAATCC TAAATGCAAATGGCTCCTTTTTTCCATGAT  
TTACAATAAAGTGTGTTGAGTTAGCAAAAAAAAAAAAAAAAAACC GACCT

>Sequ08572EST2

GTGATGGTGTGACCGCCATGCATAAAGTTTTTGGACTGGGCCGGCACAAGTCGACGAGGGCTGCTGCTATTTGTTGATG  
AAGCTGATGCCTTCCCTTCGCAAGAGATCCACTGAGAAGATCAGTGAAGACCTCAGAGCCACTTTGAATGCGTTCTTGT  
ATCGCACCCTGGAGAACAGAGCAACAAATTCATGCTGGTGTGGCCAGTAACCAACCAGAGCAGTTTGGACTGGGCCATAA  
ACGACCCTATAGTGAATTTTGGCTCTGCCGGGCTCAGGAGAGGGGAGAGGCTGGTGCAGTTGACTCTTGT  
ACAGATATGTGCTGGAGCCGACTGGAGGGAGGCAGAGGATGAAGCTGGCACAGTTTGGACTACGGTAAAAAGTGCTC  
TGAGATTGCGAAGAGGACAGAGGGCATGTCAGGAAGAGAGATCTCCAAGCTGGGTGTGGCCTGGCAGGCAGCAGCATA  
TTCCCTCAGAAGATGGGGTCTGACAGAGGCTATGATTGACGCTCGGGTTGACGACGCTGTC AAGCAACACGTTTCAGAA  
GATGGACTGGCTGCGTGGAGATGAGGAGGCTCAGGTCAAGACCCCTTACCCCTCCTGCAGCTGGGGTGGCAGGCAGTGG  
GGCAAAATGGGCTCAATCTGCCTCTCAGTGAAGCACCCGAGGCTCAGGAGGTGATCGCGCCAGTCTTTGAGATAAAT  
GCAAAGCAAGAAGTGACAATATACCACCTCCTTCTGATATCGACCAATCGGCAGAGGGCAAAAATGCCGTTGGGCAG  
GACTGTGAAGACGCTGTCAAAGCAGAAGCTACAACAGCAGCGGAGAGTTTAGCCCCGCTGCTACCTCCACTGACAGT  
GAGAGCAAGGTGGAAGGAAAGACAAGACTGGATCCTCTCCTCAAAGGATGGAACCTCAGTTTGAATCCAAGATTTT  
TTTCCAGCGGGTGCAGGATTTAAAAGATTAGTGTCTGCCCTTTAACTATTTCTGTCAATGTCCATAAACATGTTGG  
ACTGTCTTTTATGACAGAAGATGAGTTACATGGTTGGGGAGATAATCCATTAACAAAAACAATGCTGGAGACTTTTCAT  
TCTAATATATAATGTATACATTGTAAGTGTACTTTACATGGGAATCAGATTCTGTGTCTGTAATAACAGTATATAA  
ATGTTGTGCACAGTGGAGTGTCTCTGTTGAAATGATTAATGGGTCTGTGTTTATAAACACTAAAAAAAAA

>Sequ08578SNP2

CACTGTGACTGACTTTGGTTCGTTGTCCATGTGCACAACATAGAAACTTGACATATTTTGGAAACCATTTGCGCAGGTT  
CAAGAACGTGGCAGAAGAGTCAAAGACACTATTTCCAGGTTAAGAGTCTTTGAAAAATAATATTGTGTATTTTCATGCTG  
CTGGTCTACATAAATATAATGCGTATCTTTTTTGGACTTTTTAAATGCAGCATAATATAAACAGGATTTATATTATAT  
GGATATCTGTACTTAAGATGTACAGGCAGGCCACTCATGTCAGATTGATATCGAAA ACTGATATTGGCTGATAAAC  
TCAAAGCCAAATCATGTTTTTGAATCTCTGAAAAATGATATATAGACAGTACCAATGTTGGCATCAATGTGGTTATG  
TTAATGTTGAAACAATGACATCTTTGATTATAGCTGTTGATCATGTGATCACACTCTTAAAGTTGTTGCAGAGGGTG  
TTGCATGTTTGGGCAGATGATCTCAGATGTTAATTGTCACATTAATTTCTCAGTCAGCTTGTAGCAGCTGCTGTTTACA  
TATGGCTCTTTACATTTTGGCTCCATATGCTGCATAGAAGACAGTTATAACAGCTTGCAGTACTAATCTGAGTCCACAT  
AAATGTAATCCACTTATATTCTTATTAATAATATAGGAACACACTTTTGGTGCATAAGACCCCTCTGCAGCTCACACC  
GAGCTCAGGCTCCAGTAACTGTAGTGAACAGCTGGAGTTTTTGTGGTGTGATGTGACTGTTGAAGTTGTGGGTAAAGACA  
CTGTCTGTCTTTGAATATTTGTAGAAGTTATTGGATTTTAGGAAAGAAGATGTGTAACACTAAAAACATTTTGGATTGAT  
GGCGGCAACAGATTATTTGTCTCAGTCGTGTTAACTGAATTATATCAGAAGACTCACTTTTACCAAGTGAATACGTGC  
AATACATAAATATCTCTGCTTTGATGAAGCACTGTATGTTTGTCTGACAGTCTTAGAATGAAATGTGCATGATGTGTG  
TTTTTATTTTATGCTCTCAAATGTTTATATTATAATTTTCCCAACCTTGAGAATGGCAACACTAAATACTTGAACCT  
ATGAATCCAATAAATGACATTTTGTCTCTGTGTAGTGTGCTAACATCATATAATACAGTTACATAACTGTAATTA  
AGTAACCTCATTTGTAATAGTTAAATGAATGAAAAAATAGACTAGAGATTGCTGAAAAATGATGTTTTCAATCATTAC  
TACTGAAAGTGCTCTTTAGCTTCAAATCACATTATGTTTCATTTGTGTCAGTGACACCTTCATTTTGTCTGTGAATAGAA  
GCTATTTAACATTAACAATAGCAATGCAATGAACAAAAAATAAATACTACG

>Sequ08595SNP2

GAAGGGGAGTCTGTAAAAACCTTTATGGCTGCCGTCTGGTTTCATCTCACCTCGTACAGGACTGCAAAAAATAACA  
CAATAAACCTTCAGAGTTAAGAGACCCAAAGAAGCTGTAGGAGTTATAAACACACCCCCACATTTCTATCCACTGCAGA  
CTATGTGGAATTAAGTGTAAAAACATAAAATTCCTGCTTAATTTTCAGAAAAATTTTCTCTAAAAATTCAGTTGAGTTG  
TTTTAAACATTCACATCCATTTTGGACTCTGGCTTTCCCTGACTGCTACTTCTAATTTGCAATTTCTGGAGACATACACC  
AGTTTCATGAAAAATGTTTGTGTTTGTGAATGTTTGTGCTGCTGTAAAGTGTCTCCATCGCTTCCCCAAATCAAATCTCTAA  
TTTCACACAGGAGCCATAAACAGACTGCTGCTGCTGCTGTTGTTGATTGAAAGCCTTTATCTATATCATGTAATCT  
TTCTTTGATCATGTGAAATTCACGGTAAGGTAACATGATTTGTGGGGGATGAAATTTTTTTTCCACAAAAACGCAA  
CAAGTACTCAAAGCAACAAAGACCCAGGACTGAACATTTTCATGACTCCAAACACCTTTACTGTATGTTTGATCT  
TTGAACTCATAGGACGATGTCATATATCCAAAAAACCTGCTACTGTTACGTGCAAACTGTGAGACTGTGTATATTGT  
TTTTGTATATAAAGAATAATGACGAAAAA

>Sequ08700SNP2

TCTTGCAAAACATAACAGATGAATACATTTTGGCAGGTATATCGTCCACTAAGTAGAAGTTTTTGGGTTTTTTTGT  
TTGTTGCTTTTAACTATTGATCTTGAATTTAACAGTGAACCTGATTGCAAAAAATGGTTGATCAGTGACAAAAGGCCA  
CATTTACGTCCCTCAGATTTTGCAGTAGGGTTTGTGAAACATACTTTCCCATGCACAGAGAGAAATGGAGAACGGGGC  
ATTTAACAGAGCTTTAAAGCCATCCTCACATGAATCAAATCTCTGCCGCTGGAGAAATCCTAAATCAGTAAAGCTGC  
TGATAATGCGGTTACCTGTGGCAGAATCAGGATGCCTCATGGCTTTGAAAGGCCCTGGTGTGCATCATTATGTGTCAG  
TGAATTTCCCTTCACAGTCTGAAGCCTGCTGTTGGGGAAATTTTTAATATGACAAAGAAAAGGTACGCTGACTCACAC  
GAATCATGCACAAATGTGAACCTGCTGAAGATTTATTTGTCTGTAATGCTTTATTTGATCACTGAAGTGTTTTTGATTGA  
CTGATTTTAAGTATAATTCATATCAGTGTTTTTTATTTATATTTCTCCTCCAGCCAAACTGGAGTATTCCACTGCTTGT  
GTCTCTACATTCGGCTTGATGTGAAATAAAAAAGAATACTCTGGTTGAGTGCAAGATTTTTTGGTCAATCTTCTGGATG  
TTTGGGAGTAATCTTTTGGGTGCTGCAAAATTTTATTTCCCTTTGTGAGTACCAGTACTGTTTATTGGCACTAGAGGGC  
GACAGAGGACACAATATGTCGGCCGTCTGCTTCTCTGCCGAGAGAAATCCTGCTTTATCATCAAATGAATCCT

>Sequ08730EST2

AAAACAGCCAGGAACCTCAATCAGCCCATGTGCAAGGCAGCCAAAACCCTATAGTTGAGGTGGAGGAGGTGGTGGAC  
GTTGGGGACCTTTGCTGAAGAGGACATCCACATACCCAGCATCTATGTCCACAAGGTTGTCAAGGGAGCCAGCTACGA  
GAAAAGGATTGAGAAACGCACAGTAAGGAAAAGCCAGGAACAGAAGCCCAAACCAAGAAGGACTCGGATATTGTTCCG  
GGAAAGGATCATTCGCCGGGCTGCTCTGGAGTTTCAGGATGGGATGTATGCAAACTTTGGTATAGGTATACCCCATGT  
TGGCGAGCAACCTCATAAAACAGACATCACTGTACATCTTCAAAGTGAAAAATGGAATTTCTGGGACTGGGCCCCGTACC  
CCACTGAGGATGCGGTGGATGCGGACCTGATTAACGCTGGAAAGGAGACCCTCAGTGTCTCCCTGGGGCCGCTTATT  
TCTCCAGTGACGAGTCAATTTGCCATGATCCGTGGGGGTCACATCAACCTGACAAATGCTGGGAGCCATGCAGGTGTCAA





CGCCCTTACCCCCCAATCCTCCTGGACCATGGCGAACCCTCTGAGAGCTGAAGTGGTTCGACTCTATAAAAATCTC  
CTCTACCTCGGTGAGAGTACCCCAAAGGAGGCGAGTACTTCAGAGACCGACTGAGAGCGGGTTCACCAAGAACAAG  
TCAGTCCAGGACCCGGAGCAGATCAAGGAGATGATCGCTCGTGGGGAGTACGTGGCCCGAGAGCTGGAGCGCTCTAC  
TACCTGAGGAAGTACAGAGCGCTGAAGAAAACGCTACTATGAGGAATAAACAGCTGCCGCGAGAGACTCAGGACAGACTC  
CACCCACTGAAACCACCTGTGTAAATCACCATCAGCTGCCAGAAAAACAAGACACGTACAAAAATATAAAGAGTCTTT  
GTTTATTTTTCAGGCTCATTA AAAACTGGAATGACAGAACAACAGAAATGAGCAGCAGCTTCGAGGTTTTAATGTTTTAT  
TCCTGTGAGTTCATTCAGCTCTGAGAGAAAACACTTAAATAAAGTCATAAAAAAAGA

>Sequ09223EST2

CACCGTGGCCGAGCTCCGGGAAGACGAGGACAGGCCTACTTCAGTTCCTACGGCCATTATAGCATCCACGAGGAGATG  
CTGAAGNNTAAAGTGCACAGAGAGTTACCGTGACTTCATGTACCGCAACCCTGAGGTGTTCAAAGACAAGGTGGTG  
CTCGATGTGGGCTGTGGGACTGGCATACTGTCCATGTTTTGCCGCCAGAGCTGGGGCCAAGAAAGTGATAGCAGTTGAC  
CAATCAGAAATCATCTATCAAGCCATGGACATAGTCAGGTCCAACCAGCTGGAGCTGGAGGACAAGATCACTCTGATC  
AAAGGCCGCATAGAAGACATCAACCTCCCAGTGGAGAAGGTGGACATCATCTCAGAGTGGATGGGTACTTCTCTG  
CTGTTTGTAGTCCATGTTGGACTCAGTCTGTACGCCAGAGACCTCTACTTGGCTGACGGTGGCTCAGTCTATCCAGAC  
CTTTGTAATATCAGCCTGGCAGCAGTGGGTGACACACAGAAGCAAGACCGCATTGCATTCTGGGACGACGTGTAT  
GGCTTCAACATGGCATGCATGAAGAAGGCTGTGGTGCCTGAGGCTATGGTGAAGTGGTGAAAGCAGATACCCTCATC  
TCTGAGCCGACAGTCATACAGACGATTGACTGTAACAGAGTGTGTCTGTCTGAGCTGGAGTTCGCATCAGATTTCT

>Sequ09293SNP2

TCCAGGGTCGTCACTATGAGTGCAGTAATGACTGTCTGAGATGCAAACTACTTCAGCCGCTGTAACCTCGATAAGAG  
TGGAGAGCGGTTGTTGGGTGGCCTACGAGAAGCCCAATTATGGCGGCTACCAGTATATGCTGCACAAGGGCGAGTACC  
CCGACTACCAACGCTGGGCAGGCTTCAATGACTGCATCCGCTCCTGCCGTATGGTGCCACCTTATAATGGAACTACA  
GGATGAAGATCTTTGAGCGGTCTGACTTTGGGGCCAGAATCTGGAGCTAATGGACGACTGCCAGATCTGCACGAGC  
GTTTCCACACCCGTGACATCTCCTCCGTCAACGTCATGGAGGGCTACTGGATGCTGCATGAACACCCTAATTACAGGG  
GACGCCAGTACTTCTTTCGCTCCCGGAGAGTACAGGAGGCACAGTGTGGGGAAGCACCAGCCCTACCATTGGCTCTC  
TGAGACGTACTGACTGAGATCAACTGATTCCCAGTTGTTTTGTTTTACCCTTACTGAAGCCCAGTGTGAGCTTTCC  
ACCCTTTTGTTCATCCTAATGCCAACAGTGTTCATGTCACAACAATGTGGTGTCTAACCTGAAATATACATTTTA  
ATTGATGGGAGTTTTGGTGCCTGATGTTGGGTTCTGGTTTTGTTGGGTTGCTCTGCATTGTTGGGTAAGTTCTCTC  
CCCACTCAGTGTCAAGCAATGCTCACAGTAAATAGTGATGATCTTTTTTGTCTTGGTGTCCATTGCAAAATGGT  
TTTGCCTCACTAGTCCCAACCTCCTGTCTACTGGAATCACAATAAATGAAAACCTTGATTAAAGTACAAAAA  
AAAAACGAAACCTACCC

>Sequ09322SNP2

AAGAGCTGATGGAACAGGACGCACCTGCTGCACGCTTTATGAAGACCATAACATCTAAATGCTGGGCCTACTCCAAAG  
AGGCTATGAAGACAAAGAGGGACGTGTACTTCAGACCTGGCTTCGCTCTTATGACGCCTATGCAATGGCGGCCTGCA  
TCGACGGCAGCGTGGTGACGGAGAGCATCGAGTGTCTGTCCGTGTGGAGCTGCAGGGGTCGATGTGTGCGGCATGA  
TGGCTCTCGATCGCCTAATAAGCTGAAGAAGAGTCAAGTGTGTTTTGTTATGTCTAAATGTGACGTGGCCAAGTTTA  
GTCAGCTACTAATGGAGTCTCTAAGACAACCGTGAATAAATAAATCTTTGGTGTAAATCGAGGAAAATAGATATCTGG  
CTCATAAGGCTGAGAAAATAACTTAACTAAATAAATTTAAACCGAATGGTTTTCATGAGTAAACATGATGTGAATC  
AGATGCCGTGACCTTCAGTTAGAAAATGAAGAAGACGTTAGACAGCGCTCTCCACCACCATCATTCACGCAACAAACA  
GGGAATATCTTTGAGAAGAAATGGTGTTCATCTCTCCAGTAGAGATTCACAGACACAGAAGATGTTTTTCTCTTTTC  
TTTCTCTAATCTGTACCGATGTGTAAGTGTGTAGATGCAAATGGAATGAAATCACAAAAAACAGATGTTTTTGCAGAA  
ATCCTTTATTTAAATTTGCTGACAAAAAAG

>Sequ09323EST2, Sequ09323SNP2

GCATATACAAACACTCAGTCAAGCATCCACGCTCACCCCAAACTGCTCTAGTGGCCAGCAGAGAAGTACTGATTC  
CTTCATACAGGCGCATGGCTAACAAGGTCCATCCTACGGCATGAGCCGGCAGGTTCCAGGATAAAAATTGACAGCAAG  
TATGACCCGTAAGTGGAGCAGATCCTGGTGGAGTGGATTGCCCGTCAGTGTGGCTCCAGTGTGGGGAATCCAGAACCC  
GGCAAAATGGGCTTCCAGGCTGGCTTAAAGACGGATGTGTCTTATCACGCTGATTAACAGTCTGTCTACTGGAGAC  
GGTCCCTTGAAGAAGGCCACACCTCACCCATGGCCTTCAAACAGATGGAGCAGATCTCCAGTTCCTCAGTGTGCT  
GGAAGTATGGCTCATCAAGACTGACATGTTCCAGACCGTGGACCTCTGGGAAGGGAAGGACCTGGCGCGGTGCAG  
AGGACCCGTGTCGGCTCTGGGCAGCTTGGCTGTTACCAAGGATGAAGGCACATACAAAGGAGACCCCTAGCTGGTTCTTC  
AAGAAAGCACAGGAGAACAAGCGAGATTTTCAGCGATGAGCAGATGAAGGCGGGCAAAAATGTTATTGGCCTACAGATG  
GGCTCCAATAAGGGAGCCAGTCAGGAGGGTATGAGCTACGGAAGACCCCGGCAGATCATGTAAAACCACTGAGCCACA  
AGATACCAAAACCTCTGCTGCCCTGACACCCCTCTAAGACCGCTGTAAGCGTCTAATGCTTCCCTTTTCATCGTAAAC  
CTTCTCTGCTTTAGAAAATGATTTACTTTTCAAACAAGTTCCCTCTCCTCTCTAGTCTTGACACTTGGCCGAGAACCCCT  
TATGTAGATGCTTACACTGGTGACCGTTGCAGAGCTCACCATGCTTTGTCTTCCACTGCAGTTAGGACCAGTAAAA  
CTGATAAAAAAATAACCATAAAAAATGACCAACTCATTGCCTTGGAGTTAAAAACACGAAGACGACCATGTTCCAAAAG  
TCATGTTGTTCTTCTTAATATGAAACAGCATTGATATTACAGATGACTGAGCACTGTCTCATCTCTGTGTACCAAC  
ATCTGAATCATGGCACCCTTTTCTAAATTTTACAAATAGGCTATTGCTTCTGGATTCTGACTCAGAGATCGATTTTT  
GTATGTAATTTGCAGAAGGGACATTTCTTTACAATTATAGTGGTGCACAACTGTGGCATAACCAGTAACTACTCCTTA  
ATTTTACTGTTACAATATTGTTCCACCCTTCCCACAATGCTCTGCCTGCCATATCAGTGGCCATATTTTTGTACATT  
GTCTTATTAATAATGACTTTGAAATACATCTCTGAATTGACTTTGTGATTCTGGTATTGAGTGTGTTTTGAAGACAG  
ACTTAATAAATGTGCTTCCA

>Sequ09495EST2

AGGGAGCTCACTCAGGACAGGACTTGGAAATGCCTTCTCTCCACATCAGTGTTCGACGGCATCTTCCACATGA  
CCCGTGTCTTTGATGATGAGGATATTATCCACGTGGAGGGTAACGTGGACCCAGTGGGGACATCGAAATCATCCAG  
AGGAGCTGCAGCTAAAAGATGAGGAAATGATGGCTCCAATTATTGACAACTGGAGAAAACCGCCGTGAGAGGGGG

ACAAAAAACTCAAACCTGAATATGATATCATATTGAAGGTAAAGAAC TGGGTGGTGGACGAGAAGAAACACGTCAGA  
TTCTACCATGACTGGAATGACAAAAGAGATTGAGGTGTTGAACAATACCTGTTTCTTACATCCAAGCCCATGATCTACC  
TGGTGAATCTCTCGGAGAAAAGATTACATACAGAAAAAAGAACAAGTAGGTTGGTAAAAATCAAGGAGTGGATAGACGC  
TCATGATCCTGGTCTGGTTCATTCCCCCTGAGTGGAGCTCTGGAGTCCAAGCTGCTGGACATGGAAGATGAAGAGG  
AGAGGAATAAGTACTGCGAGGAAAATGAAGACACAGAGTGTCTGACCAAAATAATAAAGACCGGCTATTCAGCACTG  
CAGCTGGAATACTTCTTACAGCAGGACCAGATGAGGTGCGAGCGTGGACCGTCAGGAAAGGTTCCAAGGCTCCTCAA  
GCTGCAGGAAAGATCCACACTGACTTTGAGAAAGGCTTTATCATGGCCGAGGTGATGAAATACAGTGACTTCAAAGAG  
GAGGGCAGTGAATAATGCAGTCAAGGCTGCTGGGAAATACAGGCAACAGGGCAGGAACTACATCGTGGAGGATGGGGAC  
ATTATCTTTTTCAAATCAACACACCAAAACGCCCCATAAAAGAAATGAGACCATACAATCACCAGAGGGGAGAACTCAG  
AATACGTTCAGTCCGGCCCCCTGAGAGCTACACTGTCTGCTGGCTTTCATACTTCTCTTGGATTTTCAGAGGATCAAC  
ATGCAGCCTGGTCCGCCAGAGATAATTTACTCACCTGGCCTGGTCTGGAGCAGAATCTATCAAAAATGATTCTGTATAAT  
ACGAATCTATACAAAACACACCATAACATTCCTATGTATAAGAATATGAACAAAATTTTGAATGGTACCAACTGCACTG  
CCAGTCAAACATTGTTGAACACACTCACAGTCAAGAAGAGATGTGACTGTAAT

>Sequ09509EST2

ATTAGGTCCCAGTCCCAGTCCACACCTGACAGCAAAATGTCTGACAAAGGAAC TTCGATACCAACGTGCTGACCCTC  
ACCAGGTTTGTCTGGAGAGGGCAGGAAGGCACAAGGGACAGGTGAGCTGACTAACCTGCTCAACTCCATCTGCACTG  
CTGTCAAAGCCATTTCCACTGCTGTGAGGAAGGCTGGGATCGCTAACCTATATGGCATCGCTGGAAGCACCAACGTGA  
CAGGGGACCAGGTGAAGAAGCTGGATGTCCTGTCCAACGACCTGGTTCATCAACATGCTCAAGTCTCCTTCTCCTCCTG  
CATGCTTGTGTGAGAGGAAGACGAGAGGGCCCTCATTGTGGAGCCAGACAAGAGAGGAAAAATACATTGTGTGCTTTGA  
TCCTCTGGATGGTTCTCAAACATTGACTGTCTGGTCTCTATTGGAACAAATTTTGGCATCTACAAAAAGACCACAGA  
TGACGACCATCTGAGAAGGATGCTTTGCAGCTGGAAGAAACATTGTTGCTGCTGGTTATGCTCTGTATGGAAGTGC  
CACCATGATGGTCTCTCCACTGGTCAGGGCGTCAACTGCTTCATGCTTGACCCTGCGATCGGTGAGTTTCATCTTGGT  
AGATCGAGATGTGAAGATTAAGAAAAGGGGAAAAATCTACAGTTTGAATGAAGGATATGCGCAGCACTTTTACCCAGA  
TGTGACAGAGTACCTGCAAAAAGAAATACCCGGAGGATGGTTCTGCTCCATATGGCAGTGCATATGTTGGTTCAAT  
GGTAGCTGATGTTACCCGTACTTTGGTGTATGGAGGAATCTTTTATATCCTGCTAATGTCAAGAGTCTTAAGGGCAA  
GCTGAGGCTGCTGTATGAGTGCAACCCCATGGCCTTCATCATGGAGCAGGCAGGAGGCATGGCCACGACAGGATCCAT  
GAATGTTCTGGACATCCAGCCCCACCAATATCCACCAGCGAGTCCCTGTGGTCTTGGATCCCTGATGATGTGCAAGA  
ATATCTTTCAATCTACAAGAAGCATAACAAATGAGGTAATCAGATCTGCTAAAAATACTCAAGACAGTTTAAAGTAA  
TCATCGACTGCCAACTCTCTGGGAAAATAAATTAGCCCCCCCCCAGTCTCTTTGAATACAGCAGGTCAA  
GTCTGGTGTGAGCAGAACTAACACTAAGAGACTCTATCGGGACATTTTCACTCATTCCTCAGCTGCACTGATGAAG  
GAACCATGAGCTTCACTGGACCCACGAACCTCACCTCACACTGTGCCACTTCCAGCTCATTGCTGTGTGTGTTATTTG  
AAGGGACTGTAACCTGTA

>Sequ09514EST2

ACGACTATGCCGCAAGAAGATGGGCATCGACCACAAAGGCCAGGTGTGTGTGATGATCCACAGTGGCAGCAGAGGGCC  
TAGGACACCAGGTGGCCACAGATGCTCTTGTGGCCATGGAGAAGGCGATGAAGAGGGGATAAGATCATAGTGAACGACC  
GTCAGCTGGCGTGCGCCCATCACCTCTCAGGAGGGTCAAGACTACCTGAAGGGGATGGCTGCCGCCGAAACTATG  
CTGGGTCAACCGCTCGTCCATGACCTTCTCACCAGACAGGCGTCTCTGAGGTCTTCAACCACCGCCGACGACC  
TGGACATGCACATCATCTACGAGCTCTCGACAACATCGCCAAGGTTGAAGAACACATTTGACGACGGGACGAAACAGA  
CTCTGCTGATTACCAGCAAAGGATCCACCCGAGCTTTCCCCCACACCACCCCTCATACTGTAGACTACCAGCTC  
ACAGGTGAGCCGTTGTGATCGGAGGGACAATGGGAACCTGCAGTTACGCTTAAAGGGGACGGAGCAGGGGATGACG  
GAGACGTTCCGTTACCACCTGTGACGGAGCGGGTTCGCGCTCTCTCGAGCGAAGTCCCGCAGGAACCTGGACTTCCAG  
GACGTTCTGGACAACTGGCCGACAGGGCATCGCCATCCGAGTGGCTTCAACCAAACTGGTCATGGAGGAGGCTCCT  
GAATCGTACAAAACTGACGGACGTCGTCAACACGTTGTCACGACGCTGGGATCAGTAAGAAGGCAGTCAAACCTGAGA  
CCCATCGCTGTGATTAAGGCTGAAGCTGACAGACTCTTTATTTAAAGACAATTTACAACAAAAGGACATGAAG  
ACAAAAAACTCAAGACGCAAAATCCACAGGAATCTTTAAAGACAGAAGATATTTGCTCAAATATTTTTTTTTTTGG  
AATTTATGTTGAAGAGCTGAAATACACTAATAAGAAAATAATTGATTGAACATTTTATTTCTCTGTTTATGCCAAAT  
CTGTGGTCCAAATAAAGGTGATCACTAGAAAAAACCGAAAAAACCAGGACCT

>Sequ09539EST2, Sequ09539SNP2

AGTGCAGAAACAAC TGGAGAAGCAGAGGAAGCTGAAACAAAAGCAGCTTCTAAAAGATTCTGGGGAGAAAGTGGCAG  
AACAGATTAAGTGTCTGGTAATGGTGAGAATGACAATGATCCTGATAGGAGGAACAACATTGTTTTCAACGCCACCT  
CAGAGTTTTGCAGAACTCTGGGTGATATTTCCAACCTTATGGACTGTGAGGCAACAGAGAGGACCAAGAAGACATTATGG  
ACTTTGAACAGGAGGAAGAGAAAAGATGATGCTGGAGATTGAGACTCTGAAAAATGGATGAGAACGTTGGATGGAGCACA  
GTCAACCTGGATGAAGAGCAAAAAACAACCTGACTTCTCCACAGCCTCAGCCACCATTTTAGATGAAGAGCCCCATCGTC  
AATCTGGCCTTGCTGCTGCCTTGCTTTTGTGCAAAAAACAAGGTTCTGTTGGACACTCAAATGCAGAAGGTAGCCGCT  
GTCAAAGCCCAAAGGGCGCCCTGCCCAACGACAACACTACTGCATGAGGACAAGATGGGCTTTGATGACAAGTACAGT  
CGCAGAGAAGAATACAGAGGCTTCACTCAAGACTTCAAGGAGAAGGATGGGTACAAGCCTGACGTTAAGATTGAATAT  
GTGGATGAGTCTGGGCGAAACTCACTCCAAAAGAAGCTTTCAGGCAGCTTTCACATCGATTCCATGGGAAAGGATCT  
GGAAAGATGAAGCAGAGAGAAGGATGAAAAGCTGGAGGAAGAGGCACTGCTGAAGAAGATGAGCAGCAGTGAATACT  
CCTCTGGGGACTGTTGCCTTGCTTCAAGAGAAGCAGAAGTCTCAGAAAACACCATATATTGTGCTTAGTGGGAGTGGAA  
AAAAGTATGAATGCAACACCATCACTAAATGAGTGAATGGAGAAGGATGATATCTTTAATACAAACGTTACACATT  
CATACACAGGATGTTTTAAGTAAAGTAACTGCTATAATGTGATGACCCAGTACATACAAGTGTCACTGCTGTAGTAAAG  
AATTGTTGAATAAAAAAT

>Sequ09683EST2

TGACAAAGTTGAGCTGGAAGCCACTGATAATGCTATTGATACCCTGGGCTTCACTGGTGGAGGAGAAGATGAGCATCTA  
CAAGATGACTGGTGTCTGTCTCCACCATGGTAACATGAAGTTCAAGCAGAAGCAGCGTGGAGCAGGCTGAGCCCCGA  
TGGCACAGAGGATGCTGACAAGGTTGCTTACTTGTGGGTCTGAACTCCGCTGACATGCTGAAGGCTCTGTGCTATCC

CAGAGTGAAGGTCGGAATGAGTTCGTACCAAGGGACAGACTGTACCTCAGGTCCTGAACTCAGTCACTGCCCTGGC  
CAAGTCTATCTATGAGAGGATGTTCTTGTGGATGGTCATCCGTATCAACCAGATGTTGGACACTAAGCAGCAAAGGAA  
CTTCTTCATTGGTGTCTCGGATATTGCTGGCTTTGAAATCTTTGATTACAACAGCATGGAGCAGCTGTGCATCAACT  
CACCATTGAGAACTGCAACAGTTCCTCAACCACCATATGTTTGTCTGGAGCAAGAGGAGTACAAGAAGGAGGGTAT  
TATCTGGGAGTTCATTGACTTCGGTATGGACTTGGCTGCCTGCATTGAGCTGATTGAAAAGCCCATGGGAATCTTCTC  
CATCCTTGAGGAGGAGTGCATGTTCCCCAAGGCCTCTGACACAATCCTTCAAGAATAAGCTGTATGACCAGCATCTTG  
GCAAAAACAGAGCATTTGAGAAGCCAAAGCCCAGGCAAGGGCTGAGGCCACTTCTCCCTGGTGCATTATGCTG  
GCACTGTGGACTACAATATCACTGGCTGGCTGGACAAGAACAAGGACCCACTGAATGAGTCTGTCTGCAGCTGTACC  
AGAAGTCCCCAGTTAACTGTTGGCATTTCCTGTATCCACCTGTTGTTGAGGAGACCCGGTGGTGGAAAAGAAGGGAGGCA  
AGAAGAAGGGTGGCTCTATGCAGACTGTGTCTTACAGTTCAGGGAGAACCTGGGCAAGCCGATGACTAACTTGAGGA  
GCACCCATCCTCACTTTGTGCGCTGCCTGATTCCCAATGAGTCAAAGACTCCAGGTCTGATGGAGAACTTCTGGTCA  
TCCACCAGCTCAGGTGTAACGGTGTGCTGGAGGGTATCAGAATCTGCAGAAAAGGTTTCCCAGCAGAATCCTCTATG  
GTGACTTCAAACAGAGTACAAGGTACTGAATGCCAGTGTATCCCTGAGGGCCAGTTCATTGACAACAAGAAGGCTG  
CAGAGAAGCTACTTGGATCCATTGATGTTGATCATGAACAGTACAATTCGGACACACCAAGGTGTTCTTCAAGGCCG  
GTTTGTGGTACCCTTGGAGAAATGAGAGATGAAAACCTGGCAGCTCTGGTTACCATGACTCAGGCTCTCTGCCGTG  
GATACCTCATGAGAAAGGAGTTTGTGAAGATGATGAAAGGAGGGAAGCCATCTATACCATCCAGTACAACAGTCCGCT  
CATTTCATGAATGTCAAGCACTGGCCATGGATGAAGGTGTACTACAAGATCAAGCCACTGCTGAAGAGTGTGAAACTG  
AGAAGGAGCTGGCTCAGATGAAGGAAAACATGAGAAGATGAAAACGACTTGGCTACTGCACTGGCCAAGAAGAAGG  
AACTGGAAGAGAAGATGGTGTCTCTTCTGCAGGAGAAAACGATCTGCAGCTCCAAGTAGCATCCGAATCAGAGAATC  
TGTCAGATGCTGAGGAGAGATGTGAGGGACTCATCAAGAGCAAGATTCAGCTGGAGGC

>Sequ09813EST2

TGGAGATTGAGGTCAGCGTCTGATGGGGCCAAACATCGCTAGCGAGGTGGCAGATGAGAAGTTCGCGAAACCACCA  
TTGGAGCCAAAAATGAGGGAAACGGCCAAATCTTCAAAGAGCTGCTTCAGACTTCCAACTTTCGCATCAACGTCGTAC  
ATGAGAGCGACACAGTGGAGATGTGCGGAGCCTTAAAGAATATTGTGGCAGTAGGTGCTGGATTCTGCGACGGCCTCG  
GTTTCGGCGACAAACCAAAGCGGCGGTGATCAGGCTGGGTCTGATGGAAATGGTGCCTTCTCCAAACTGTTCTGCA  
AAACCAAGTGAGCTCCTCCACCTTCTTGGAAAGCTGCGGCTGGCCGACCTCATCACACCTGCTACGGCGGACGGA  
ACCGTAAAGTTGCCGAGGCCTTCGTCAAAAACAGGCAAGTCAATCGCTGAACTGGAGGCAGAAATGCTCAACGGCCGGA  
AGCTTCAGGGTCCCCAGACTTCGGCTGAGGTCTACAAGATCCTGCAAAAAGAACGACATAGTCAACCAGTTCCTTGT  
TTGCAGCCGCTTACCAGATCTGCTTTGAGGGCAAAGAGGTGAAAGAGTTCATCACCTGTCTGCAGAACCATCCAGAAC  
ACATGTAATGTGGCCAGTGTGCAGGCAGGTCCACCAGCTGCTCCTCAGTACAATTTACCATCACTAGAGGGTGA  
GAGGTTTCATAAGGTAGAAAACGCACAATACAACAAAGCAAACCAACCCTTTTACTTAAGATCATTTTTTATCGGTG  
ACATTTTCATTTAAAAAACTAACAACATATATTTGTTCTTAGCTCAAAAAGCAATTTATTAATTGACTTTATTTCTTAT  
TTGCGAAAGGTTCTTTAATATTTTTTGGGCTTTTTGTGTCAGTGAAGTAAAAATATCAATTAATGATACAAAGCTGTAT  
TTTTTAACGTGGTGTAGTATAAAAACCTCTCTTAAGGCAGACCCTCCACTTGTATTCTACTATAAATTGCTGTAAAA  
GTAATTTTGTATTGTGTACATAAATGCAACAATGTGGTCTTGATTTCACTACATGCACGTGTGTTTACAATCTCAA  
AATTATTTATTTTTTATCCGTATGTGGAGTTGTTTTCTCAATTAATCAATTCAT

>Sequ09916EST2

AGCGACTCAACTTTCATCTCTACAGTGCCCTAAAGAAGGCCTTGTTCAAACCAGGGGCATGGTTTAAAGGTATTCTGA  
TTCCTCTGTGTGAATCGGGGACTTGTACTCTCAGGGAAGCCATCATCATCGGGAGCATACTCACAAAGTGCTCAATCC  
CTGTGCTCCACTCCAGCGCTGCGATGCTTAAAGTTGGCAGAGATGGAGTATAACGGCGCCAACAGCATTTTTCTGCGTC  
TCTTGCTTGACAAGAAATACGCCCTGCCTTTCCGTGTCTTAGATGCCTTGGTGGCCCACTTCTGTCTTCCGCAATG  
AAAAACGTGTGCTTCTGTGCTGTGGCATCAGAGTTTACTCACCTGGCTCAGCGCTACAAAGCTGACCTGGCCTCCG  
AACAGAAGACGGCACTGCTGGAGCTGCTAAAGATACAACACACCCCTCAGATATCTGCAGAGATTGCGCAGAGAAGTGC  
AAAACCTCAGAAATCAAGGATATTGAAATTTGGGCTCCCTGCTCAGTGGAAATGGATTGAGGATTCAGTCTGGTCTGTT  
CTTCTGCTTGGATGAGTTCAGTAGTGTAGATGTTGTAATTTTCATATCATGAATCTCTGAGCTTTTTTCTGCCAT  
TGCAGTGCAGTGTGCTTAGAAATACAAAGACTGGTATTTGTGTACATTTGATTACATTTAATGCAAAAATTTGGA  
TTAAAAACAAACTG

>Sequ10028SNP2

ATCTTTTCTTGTAGTGTGACTGTACTTCACTTCCAGCACTAAGGCCGGTGGTTGTTGAAATGATGCTTTTACTTGGCT  
CTCCTTCTCCTCGCTCTCTTCTTTAAACCATGCTGTTATTTTCTATGAAAAGGGGTGTGACTGTGGTCCAATATTG  
CTAGCTTCTGTTTTCAAGTAGCCCATTCAGCAGCACTTACCGATTAGGGCTTGGTCAATAAGTTGTCTTTAGGTGGCACT  
TTACAACGTAGAAGTGGTTTAGATCAGTGTGAAGATGCTTTGGCATTGAGCACACGGTTTTGACGGGTGTTTGTCAA  
CAGGTTTGGTGAATGATGTGTGCTTTTCTATGTCTAAATGAAACTGATGCATGCAACAAGCTTGCTTCTGGAGTTG  
TTTTAGTTTTTATTTTAAATCAATGGTGTAGATGATTAAGTAAATTTATCATGCAAAATAGTGTGTTTGTGCTGAGTAAAGC  
CGTCAACATTTAGATTTTCGTCTCTGAAGCATTTGTTTTCTTTCATGGCTGAGGCATTTGTGTGACACCATAGCTAAAA  
TGTGCCCTCGCCACTTAGAAATTCAGTTATTGCCTCTGACCAATCTTATCTGTTAAATGTTTGGAGATCTCTCTGCTG  
GTTTGCCTACTGTACACTTTTACATCCTGTTGGAAATGTCTGTGGCCTCTGGCTTCTTACACCAACAGGAGGAAG  
ATAGATGATTGAAATGGCGTCATTAACACTGAAGTCAAGTCAAGTCTTGGCTACTCTATGCTATGACTACCTTCT  
GTTAGGGTCTGTAGATACTGCGGATACAAGTGTGAACTGCCTGGCATGCTTGTAAACCTTGTACACTGTATGCT  
GGACACTGGTCTGTTTCTGTACGCTATTTACCCCTTTTTTACCCTCTGAAATAAAAATTACACTATCAGACAACC  
AAAAAAAAAAAAACCGACTA

>Sequ10037EST2

GCCAGAGAAGGAGAGAATTNAGGCTCAAACAAACCTTTGATGCCAAGAGTGCCTGCTATGTCTGTTGATGCCAAGGAG  
CTCTACTTGAAGGCAACAATCCTCAAGAAAGACGGTGGCAAAGTCAAGTCAAGTCTGGACACTCAGGAGGAGAAG  
ACAGTTAAAGAAGATGATGTCACTCCAATGAACCTCCCAAGTTCGACAAAAATGAGGATATGGCCATGATGACCCAT  
CTCAATGAAGCCTCTGCTCTGATAAATCTCAAAGAGCGTTATGAGCATGGATGATCTACACCTACTCTGGGTTGTTT





AGCAGGGTTTTGTTTCTCTTTGACGCTTACACCTTGAGACAAAAGAACTGAACCTGGCTGTGCCATGTTGGTAAC  
CTTTGTTTAAACAGACAAGTTTGGAGGTGATGAAATAAACAGCAAAAGGACAGGCTTGTTTCAGATCAACTGCCAAAAGAA  
AAGTGCCACACAGAAAAGACAGAACCTAGTCGCCTATTAGTCCCTGTACGGCACAAAACCTGAACAAGCCTCAACAGA  
ACAACGCAGATCTAGAGTTGAAGCCCTTGATAAAAACAGGGGAACATATAAAAAACAAAACAGACATTATCACCACCTTT  
TCTTTCCCTGATGGTAGGTAGCTACTGAATATTTGTAGACCTACTCAGTTATGAGTGAGAGACCTTCTCTCGTCTT  
TTTACATCTCTACGCCTGGCCTTAGATGTGGTTTTATTACGTGTGAATGTACATATAGATTTTTTTTCCAATTATTTAT  
TAAAATTCATCTCTAATTAACCCAAAAGGAAGGTGAGAAAACAGAGTGAGGGAGAGAGAGATGAAAAACGAAGACA  
AAAAAGAAAAAAAAGAGGGGAGAATAGCATTGACGAGGCAATATCCCCCTCTTTTCCCCAGGTCCAGTGCATCTCGTT  
TTGCCCTGCAGTGGCTTATTTACCGAAGGCTTTGATGCCAATTGCAGCTTCTTCATCCATTGCATTTAGAACGGTGA  
TCAGGATCTCCTCTCCGGCATCGTGCTTGCTCTCTATCTCTTTTCCCAGGTCTCCCTCAGGAATCTTGAGGTCTCTC  
TCACCTCCCCGCTGTCTGGAGCAGGGACAGGTAGCCATCTTGATCCCAATGAGCTGGTAATCCATTCTCTTGATGT  
TGGGGACGTCCATGTTGTGGGTGGAGGGACAAATATCTTCATACTTCTTACCAGAGAAGATGTCGATACCAACCAAGT  
GCACCTTAGCGTGGCGGTGCTTGCCGGTCTTGAGAGGTGGACATCTCAACGATCTTGACAGGGTCGACCTTTTCAGCACAC  
AAAGCCATTTTTGCGCAGGG

>Sequ10762EST2

TGTTATCTCATCTTCATTTATTTAAGAATATCAAGAATCCATCAAGGTTGGAGATAAAATAAATGGCTTTACCTCAAC  
TGACCTTCTGTTTTTGTATTTATTTGCACTTCAGGCCATCTTGCTTGATAAGAGGTCCTCATTAATAACTTAAAAAG  
ATTACAATGGTAAACAGAAAGCTGCAGGTTTACTATACAAGATATTTCTAGACTGATGAAATAAACCTTTAAAGCTGCGT  
CAGGGTCTGATGGCCGACTTCAGCTTCCGGGAAGAGTCCGAGAGCGTTCTGCGTGCCTCCATCACCTTCTCCAGC  
GACACTCTTTAATCTTACTGATGTACTCAGCAGAGATACAGATGTTTTTTGGCTCATTTCTCACCTGCTTTTTCTGGA  
CCCAGAGCAGGTGAATCTGTTTTCCAGGCAGATGTTCTTAATGGTAACGTTTACAAGTTTTCTGCTGTTCCGCTCCGT  
ATTATGGATGGTGGGATAGAGAAAAGAAATATCCAGCCTTCACTCCCTCCATGGCAACAGACGGTTTTCCATCGAAAGC  
ATGAAGCAGGACTTTTTTCGACACCTTGCTTCTTTGAGGAGGTTGATCGTGGGTCTTCTGCAGACCGTAAATGGACAT  
TTAGAGGAAGATCCAGCTCCTTGCTATCTGTGCTTGACGAATGAGGACCTGCTCTGGCTCTCTGTATCAGTGTCTAT  
TGCTGACATATCTGGGTGTAATAATCCAAACCGACCTCCCCAATAGCAACTAGGTGGTCTTTGTATTTCTCTATGAGGG  
GTAAGCAGCATCGAGATCCTGGAGAGAAGCACCTCTCTGCTGCTCTGGGAAACTTCTTGAACAGGGTGGACTCCTA  
AGCAGGGGAAAAATAAAACCTGGAAACCTTTCTGACAACGCAATAATCTTGTCAAATTTCCCAGCATGCTCTGCGACGG  
CTAACAGCGCCAAACAATCCAGCCTTTTTTTGAATTCTCAACCACCTCCTCTATGTCTTGTCAAATTTCCCAGCAGAGA  
TATGACAGTGACAGTCAACGTAGCCATGCATGTGGACAAT

>Sequ10772EST2

CTGCCAGAGACTGGCTCCTGAAGACGGCCAATGACAAATCTGCTGTGCCAAACATTTCTGGCTCTGTCCACCAACG  
CAGCTAAAGTCAAGGATTTTGGCATCGACACAGCGAACATGTTTCAGTCTTGGATGGGTGGAGGTCGTTACTCAC  
TGTGGTCAGCCATCGGTCTGTCCATCGCTCTGCACGTAGGCTTTGAGAACTTCGAGCAGCTGCTGGCGGGAGCTCACT  
GGATGGACAACCATTTCCGACGCGCCCCCTGGAGAAGAAGCTCCCCGCTCTATTTGGCTCTTCTCGGAGTCTGGTACA  
TCAACTTCTTCCAGCTGAGACTCACGCCATGCTGCCCTACGACCAGTACATGCACCGCTTCGCCCGCTACTTCCAAC  
AGGGCGACATGGAGTCAAACCGGAAGTACATCACCAAGACGGCGCCCGCTCAACTACCACACCGGCCCTCGTGT  
GGGGGAGCCGGGACCAACGGACAGACGCCTTCTACAGCTGATCCACCAAGGTAATCGTATGATTTCTGCTGACT  
TCCTCATTTCTGCCAGTCTCAGCATCCAATCAGACAACTCCACCACAAGATCCTGGTGGCAGACTTCTCTGGCTC  
AGACAGAAGCTCTGATGAAGGGAAAAGACTTCCGACGAGGCTCGTAAGGAGCTGGAGGCCGGCGGCTGAAGAGGGACG  
CTCTGGAGAAGCTGCTGCCTCACAAAGTCTTCCAGGGAAACAAGCCGAGCAACTCCATCGTTTTTAAAGAAGCTGACTC  
CGTTCTACTGGGAGCTCTGGTCCGCATGTACGAACACAAGATCTTTGTTACAGGCATCATGTGGGACATCAACAGCT  
ACGACCAGTGGGGTGGAGCTGGGGAAGCAGCTGGCGAAGAAGATCGAGCCGGAGCTGCAGGACGCCTCGGAGGTCAC  
TCCCACGACTCGTCCACCAACGGCCTCATCAGCTTCTGAAGAAGAACTTCGCTGAGTCTGACTCCTCCTCTCTGC  
TCCTCTGCTGGACCCACC

>Sequ10812SNP2

TGCTGCCGATGGAGCTCACAGCCAACCTTAAATAGTTCTTAGAGACAACAGGTAGTGATACATCACATTTGTAAGG  
CAAGACTGAAAAAAAAGGTCTCACGGTTCCGACACAAGCTGAGAAGACTGTCGAGTTTGAAGTAAAACACAAAAA  
GCATGTAAGCAACCACAGGAACCATGGGTGAGTGTCCAGGCTGGCACATCAACACATTCAGAGAACAGAGTTTAAAGA  
CAAACCTGGCAGAAAGACTGATATAACAACAATGAGCTTCCAGCCATGATTTCTGCAAAGTGCATTAAGCATGGAAGCAAT  
AATAATCACATGCAATACACATGGGAACAAAGAAGCTTTTACCAATGCTGCCATCAGGTACAACAATTCAGAGAGGCTT  
TATAAAGTAGCAAGGTACATACATTTGCTACCAAAAGCTGTCCAATTTCTTCTGAATATCCTTTGTAGTTTAAACTG  
AACTGTTGTCTACAAAAAGATGACTAAAGGCTGCAGCAGAGTAAAAGTCTGACAGTTCTCTACCTGCTTTGGTTTCAGT  
CAGCGAGCAGCTGAACACAGTGTAGCATTTAGCAGCTGAAGAGCCAAAACAGAGCTGACAGGAGAGTGAGTATTGGA  
CTTACATTCATCATTTGGACACATCAAAATGAATGAAACATAAAAACACTTAATGCAGCTTTTATTTCTGTGTTTCTC  
AGAGTGAAGGCAGGAGCTAAAGGTCAGTGTTCAGGCGGTTCTCCGGAGCCCGTCTAACTCTACAAAGTCAAGGAACC  
GACGCTTTCACGACCGGGGTTAATTCATTGAATGAAATTTGAAGCAGAGAAGCAAGAAGTGTGGAATGTGGTGAAGT  
TTGTAATCTTCTTAAACAAGAACTTTGTGAGAGTTTACCACATTTGTGGTCAACAATTAACCTGGAGAGAAACAGCAG  
AGGTACAGTCCGGCTTTTGGGACGTAGACTTGTCTGCAGTCATACCCGGAGTCAAGAGGACACAGATCGGTTTCATCT  
GTGTGTGTCGAGGACACAGATATGTCACAGGATATGGTTAGTCTCTCAAACATATATTAGATAGCTAGCTACTTACAAA  
TATATCCAAGTGTGTGCTTTACAT

>Sequ10833SNP2

AATGCACCTGAAAACCTCAGGAGGAATCTCCATTGATAGATGATAGATGATAGATTGATAGTATTTTTTTTTTTTTTCAA  
CCTCTTAAACGTTTAAATATGCCATATACATTTGTAGGGAAATTTGTTGAAAAAGTGAAGCAAAATCTCATGTACAGTTTA  
TTTAAAACGTGATTTGCGACTAGTCAGTTGGTAAGAATCTTAAATCTGGTGACTCCTGACTATAAATCTGTCTCACAG  
TTATTGCTGGGGCAGCATGATACATTAATGGAAGTTGTACTATAATTAGTACTGGATAACTCAAATCATTGTGTCA  
GATCAGATTAATTTCTACTAAAAACAAGTCAGTCACAAGAAGGATAGGATAATATACATGACCAGAAAATGCTGAAGG

TGGATCTACTTGGTTGATAACACAACACTACTGAAGATGTGTCCTTCAGTGATGTCACCTTACGTTTCTATTTTTTTTTTTAG  
TTTTAGTTTTGCTCTCTTGATGGAAGTTGTTTTCTGGTGAACGTCCAATATTACACAGTCCCAGAAGTTCATACTCCCC  
ACCAGCATTTAGAGTTTCTTTTACTTCTGACTGAACAGAATCATGCTTACCTCAAAAAGAGACACATGCTTGGGTCC  
ATAATGTAGCCATTAGTGTCTGTGAATGACTGCTCAGGTTCTCCGTCGACACTGAGAAGTGTATAAAAAGTGAATT  
GCCAATAGCTATACATATATGCTAAACATCACAGAAGAGGTGGTGTGTAGCATTGTACCGTTC TTGACCTCAACA  
TGCCCTGTGGTGCCGATTCTTGTGAGATGTTGGCTCCATTTTTTTTTTCCCCCATCAGAACAGGAAGGGGTTATGGACT  
CTGTATTAGAAGGTGGGTGAGTTTTGTGCTACCGCTGCAGCACTCTGGATTATTTGAAGGTGGAACGGAAAAATACA  
AACAAAGCCAAGAAAGGAGACACAAAAAATGTAGTTTTCTAAAACCTGTTAATAAAAAATCTTTTTTTTTTAGACTAA  
AAAAAAGGACCTACCTAATAGT

>Sequ10925EST2

CCGACATTATTTAGGAGTGTGTGACATGTTCTGCGATGAATATTTAATAACAATTGCAAAGACTTTTTTTTTTCACTAT  
TTCTTCCCTCTTCCCTTTCCCTCTCCCTCTTGTGCTTTTTCCCTCTGTGGCCCGTCCGGCTGCCTTCAAAGACAGATCGG  
GCTGTAACCATAGCAACTTACAGCCACCATCGCTGTCTCGCCGGAGCTGCTGCTGCTGCCCCGACCCTTTGAGGT  
AGACTCTTAGTAGACTGAGGGACGACCTTCACTGAGAGGGACTCCTGGCTGGTGTGCTGCACATCCTTGAGAGGTGTA  
GGCGGAGATTACCAATCACCTCCGACCCAGAAAACCTCCTCCGACAGGATTCTCCTCTTTCTCCCCTTCT  
CCTTTCTTTGCATTCTTGTGTTGCCGCTTCCCTCTCTTGGGTTTACTGGGGAAGGCTTTTCTCCTCACTGTCTCTCC  
TCCCCTCCCTCTCTCTTTTTCTTTCAGGCAGGTGACTGCTCGGCGGAGTCCGCTGGCTGCGGATCGCCTGCTTTTTCC  
TGTTGCTCCATGCGAAGAATGAGTCGATCCGCAGCTGAGTCTGCTGGGCGTTGAGCTGCTTGATCACAGGCTGAAGA  
GTCTCCTCTGTTTTCCGACTGCTCCAGCCGAAACGACTGAGACAGAACTCTTTGATCATGTGAGTGTGGGCGTCCC  
CAGCAGAAGGAGCTGTCTGACTGGTCCACAGCCGGTCCAGGTAAGCTGAGCCACCACAGGGTTGGGGAACCAGGC  
TGCAGTTTTAGTCCCTCAGTTTTTTCTTACCTTCTGTGTCGAGGATCACCCATCAGACGCTTTTTCTCCTGAGCC  
TCTGACCACCATTTACTAAAAGTGTAGTGGCTCCAACCTGGCCCTGGGAACTCATTGAGAATCTCCATGCCAGTC  
ACATATCCGACCCCTGGCACACCTCTGTGTAGTCACTTCCAAGCAGGTAAGCCAGATTTATCAGTTTTCAGTCTCTGTC  
CAGACCCAGTTGGTCTGACAGGTCACTGTACTGGTAGTGTTCGACATATTTGTTCTGGCTGAAGAAATTTTTATACAC  
ATGTCGCCCTCCGAAACAGCCACACATCTGAGTCGTCTGTGATGGTCCCATGAGTTTGGTCCGTGCGGTGCGAGCTGC  
ACACTGAGACTCGGCTCCGTGCGGCCACCAGGAACGGCACGCCAACAGACGCAGGAGCTCCTGGCTCTCCAGGTA  
CATCTGTCCGGTACTGTGTTCCGACATCCTCTCTGCTGCTGTTTTCTGCTCCCTCAGGTTGC

>Sequ11009EST3

TGGAGGTGATCCATTGTTGATGAGAGCTCAGATCTTTACCTCATCTGATCTGCTCTGCTCATCAGCACTCCAGTCCA  
GTAGGTGGGGTAAAACCAAGTTTGCACACCGCCGCAATGCAAAGAAGAAGAAGAGACGAACAGGAAGTGAGGAAGT  
GAGGAAGTAAGGAAGCGTAGACCCGACAGCTGAACATGCAGATATCTGCTGCCCTGAAAAATCCTGTGTTTCTCTGAAC  
AACCATGCTGCGTCCAAACATGTCCAAAAACACGGTGTCCGACCGCTTCAGGAAAGTGGACGTGGATGAATACGACG  
AGAACAAGTTCGTGGACGAGGACGACGGAGGAGAGAACCAGGGAGGTCCGGACGAAGCAGAAGTGCACGGTCTGCTCA  
GACAGGGGAACATAAACGGTGTCTTCCACGCTGTGCTGAAGAACCCTCCAATCAACACCAAGAACCAGAATGCCAAGG  
AGCGAGCAGAGCAGCTGGTGGTCAAAGTGTGAGCAGCTTTAAGAGCAGTGACATAGAGAAAGCTGTGGGCTCTCTGG  
ACAAAGCGGGAGTGGACCTGCTGATGAAATACATCTACAGAGGCTTCGAGAAACCATCGGACAACAGCAGCGCTGTGC  
TGCTGCAGTGGCAGAAAAGGCCCTGGCTGTGGGAGGGGTGGGCTCCATAGTAAGAGTCTTGACCGCCAGGAAGACCG  
TCTGATGGTCCAGGACCCAACAGATTCCATCTGTGAATGGACATTAGACAAGAATATGGCCGAACACAAAAGTCCACGG  
AGCCGACGACAGAGACGCGTCTTCTTCTTCTGCTGCTGCTTTTTGGACATGATCCCTGTTTGTTTTTGTACTGGAAC  
TGAGTGTCTTCTTGATGCAACTCCTTCCCTTTTTTCTGCATTCACTATTTTCAGACACATGTCTGGGATTTAGACGT  
GCTGGCAGTGAGACAGGAGGTGCTGGCACCTCACACTATGTTTCCAGCAGTCCACACAGAAGAACTTAGGATGCTT  
CACTCAGACACTTCTGTCCACAGCGGCTCTTCCGCTCCTTTCAAACCTGCTTCACAGCTGCTCTGATGCCTCTGCTGGC  
TCGCTTAACATCTCTCCTCCTCTTCTTCCCTTGTGCTCTTCCCCCTCCTTCCCCTCTGAAGCCTCTGAGTCA  
CCAGTTTGGGAAATGGAAAAGATTGTTCTGGGCTGGGCTGCTCAGACTGGTGAACCTGTCCAGGTTGTTTTCCCGCCTT  
TGGCCCAGTGATGCTGGGTTCTTTTTCCCTAATGCTCTAACTTCTGAACATCTGTTCTATTTTTTTTTTCATTTTAG

>Sequ11010EST3

GTAGCACACGTTTATGTGTAGACGTTTACGCTGCGACGCTCAGTTGATCCTCTCGTTAGCGGACAGTGAAGGTTACCTG  
CTTCAACAGTGTGTAACGGCAACCTTTCTAACTGTCTTCAAACACCACAGGACGGGACTAATAGCTCTGATCACTCA  
GATTTCAATCGACAACATCAGATCAAATTTAATAACAGTAAAACCTCAGCTAGCTCCGTTATCCTAAACAAATTTAG  
CTTGACAGCTAGCTAACTGTTTGTGTTTGTAAACAACGCAAGCCACAGCTTTTTCGACCTCCTCACAGGAAAGAAGACCT  
GCCACTGATATTTGAACCATGAGTTCCTCAAGTGTGAGACAGAATTCACCAGGACTGCGAGGCTGCAATCAACAGGCAG  
ATCAACCTGGAGCTGTACGCTCCTACGTCTACCTGTCTATGGCATACTACTTTGACCGTGATGACCAGGCATTGCAC  
AACTTTGCTAAGTCTTCCGTAATCAGTCACATGAGGAGCGTGAGCACGCTGAAAAGCTCATGAAAACCTCAGAACCCAG  
AGGGGGGAAGGATCTTCTACAGGATGTCAGGAAGCCAGAGAGGGATGAGTGGGGCAGTGGTGTGAGGCTCTTGAA  
TGTGCCCTGCAGCTTGAGAAGAGCGTGAACAGTCACTGCTGGACCTGCACAAGCTCTGCTCTGATCACAATGACCCA  
CATTTGTGTGATTTCACTGAGACGCACTACCTGGACGAGCAGGTGAAGTCCATCAAAGAGCTTGCA GACTGGGTGACC  
AACCTGCGCCGATGGGAGCTCCTCAGAATGGCTTGGCCGAATACTTGTGTTGACAAAACACACCCTGGGCAAAGAAAGC  
AGCTAAATCCCTCATATCACATTTACAAAAGCTTCTATATGTGTATATTTGTATCTTGTCTCCAAATATTTTCAAAG  
CCATCTGCATGGTAGTGGCTAGTCATTA AAAACCTCTTATATTACTCATGTTGTTAATGCCATTTTCTCCATATTACAA  
AAGTATTTGCCCTGAGACATTCAAATCCCACCTTGTATCTCGCACTTCTCTCTGCTATCAGCTATGTCTTTGAC  
ATTACTATATTTTGTGCTGTTTTATGCCAGGAGCTGTTTGTCAAACCAATAAATGGAACCCCTCTGGATTCTGATCAGCC  
TCTTTCGCAGT

>Sequ11024EST3

GGTCTACTGGCCAATCAGCGGGCGGTAATAATTTCCGTGGAGGCCCTTCAACCAGGAGCAGCGGTAGTGTGTGTGTGT  
GTGGCAGTTAAACAACGTTAGTTTTAGGCGTCTTTAGCTTCAATAATGCCGTATGCTAACCAGCCGACGGTGAAAATC  
ACAGAACGTACAGACGAAAATGTCAAGTTCGTCAATTGAAAACACTGATTTGGCGGTTGCAAATTTCTATACGCCGTGT



TTCATGTCAGAAGTTCCCACTATAGCGATTGATTGGATCCAGATCGATGCCAATTCCCTCAGTACTGCATGATGAGTTC  
ATTGCGCACAGAGTCGGTCTCATACCTCTCACGAGTGTGACATTTGTGGACAAAATGCAGTATTCTAGGGACTGTACC  
TGTGATGATTTCTGTCCAGAGTGTCTGTGGAGTTGACCTGGATGTTTCGATGTACTGAAGATCAGACGCGCTATGTC  
ACCTCAGTGACCTTTTATCCAACAACCCAGAGTCACTCCCGGTGACTTCCAGGAGTCGAGACAATGATCCCAATGAC  
TACGTTGAACAAGACGACATTTTGTGTTGAAAGCTTCGTAAGGTCAGGAGCTGCGACTCAGGGCGTACGCAAGAAA  
GGCTTTGGTAAGGAGCACGCCAAGTGGAAACCAACAGCAGGGGTGTCCCTCGAGTATGATCCAGACAACGCACTCAGG  
CACACAGTCTACCCACGACCTGAGGAGTGGCCGAAGAGTGAATACTCAGAGATCGAGGAGGATGAGGTTTCAGGCTCCC  
TACGACCCCAATGGAAAACAGAAAGGTTCTTTTACAACGTGGAGTCACTGTGGCTCCCTGCGACCGCAGACCATTGTC  
ATGTCAGCGCTGGCCGTCTCAAGAAGAAGCTGAGTGCCTGCAGACCAGCTGAGCCATGAGATCCAGAGCGACGTG  
CTCACCATCAACTGAGGACATCTCACTTACAGACCAGGACTTGCCCTCACTCAGCTTTGTAATGATCAGAGGGGCTGA  
CTTTAGGATCACCGTTGAGGTACATGGCACACGTCCAGTATTGTTTATGGAGTTGATGGATTTTTCCAGCAGCAGC  
GATTGTGACATAAAGCGGTTGTGCTAAGGAGGGCAATGCAGGTTCAAGTGTGTGAGAGGGAGCTTGTCTCAGAAATTT  
ATTTGTTGCTGTCAGTGAATGTTGCCTT

>Sequ11076EST3

GGGCCAGGAGCTGACGGCCGAAAAGCATGGACATTCGTCAGGATGAGCTGGGAGATCTGGTGCACAAAAGAAATGGCTG  
CAACATCGGCAGCTATTGAGGAGGCAGTCCGAGGATTGATGAAATGATGAATCAGGCTCGAAAAGGACACATCAGGAG  
TTAAACTGGAGGTCAATGAGAGAATCCTTTTACAGCTGCACAGACCTGATGAAGGCCATCCGCATGCTGATTATAGCAT  
CTACAGATTTGCAAAAGGAGATCGTTGAGGGTGGAGGGGTGCAGCCACCTTAAAGAGTTCTACGCCAGAAACTCCCG  
CTGGACTGAGGGACTCATCTCTGCTGCCAAGGCTGTGGGCTGGGGAGCCACAGAGATGGTAGAGTCTGCTGATAAGGT  
GGTGTGCACACAGGCAAAATAGAGGAGTTGATCGTCTGCTCATGAGATTGCTGCTAGCACAGCACAGCTGGTCCG  
CGTTTCAAAGGTTAAAGCAGACCCGCAACAGTAAAGGCTGACAGTTCCTTCCACAGGCCCTCGCCGTTGGAATGAAAT  
GGCAGCTAATGTAGTGGCTCAACAAAAGACAGGCCAGGAGAACCCTGGAGGAAAAAGATAACCATGGACTTCTCTGGGAT  
GTCCCTCATCAAGTTAAGAAAAGAAGAAATGGAGTACAGGTGAAAGTGTGGAATTAGAAAAGTCAATTGGAGAACGA  
GCGACTGCGTTTGGGCGAGCTGAGGAAGAAGCACTATGACTTGGCTGGAGTTCCTCTAGAGCAGGTTTCTGAGGGGAA  
CGGCGAAGCCTCCTCGCTGGTCCATCCTGTAACCTATGTCACAAAACCCAGCAAACTGCTCTCATGAAGAACTGCTG  
GTTGGCCAGAAAACCCACATTCACCCCAAATTTAACTAAATGCCGTGAGCAGAGGATGATAATGCTCCACTACTGGAT  
GTTTGGACTGACCAGAGAAAGATCGCCTTTTTTGTGGACATACAGTTCCTTTAAGTTGCATGCTGACAATCCTCTGCCT  
CATCCTGCATCTCGCTGTTTATCCCTCCTTTGTTTTTCTTTTCTTTATGCCAAAATGGACCAGAAGCCTGTTTTTTTT  
TTTTTTAAACCTGCGATGCCTGGAAGGGATATGCTGCCTTTACTCCTTTTTTAAAAGATACATATGCATGCCATCCA  
GGCAGAACCCTTTTTATTTAGAACTGGCATCAAGAACAAAAGGTTAATATATAATTTTAGGCTGTTTTGAAAGTTG  
TTGTTTTTCTTCTGCATCACACAGATTTTAGACTATTAAGCACTACTGCTTTTAGAATACAAAACCTTGATGATGACCA  
CAAATCGACAGCATATCTTGTATGTGAATAGGTAGTTTTAGTTTTGATCATGCTTTGGACAACCTTTTTGCACCATGTT  
TTGGACATTTCAACAGAGCACATTACATTTTTCTTAAAGGTACACTGTATGCTATTTATGTTGTGGTGGGCGGTAAAG  
GAAACTGGGAAATGTGTTGTGTGCGTCCATTTTGCAGCAGAAGTTTTACATACCTCTGGCTTTGCCTTCATGATGGA  
CAATGTTCCCTCGTATGTGCAAAATAGCTTTCTTTCTCAGCAGTACAAGATTGCTCTCAGAGGCCTTGAACGTA  
CTAAAGCATTAATAATACCTGTAAAGACATACAGTCTGTATAGGAATGTGCAATTCACACCTAGTAAATATCTACAC  
TCATCTCTTGAATGTCCCTTTAGAGGAGAACCTGGATATTATGTTAAAGCATATAGACAGACTTAATTTCTGCACACA  
AATATCAGATGATAGTGTCTTAATTAATAACTTCTTCTAGGCTGAATATGAAGATGTAGGTTAGTTAATGTAT  
AATATTAAGTTTACCTCCACTTTGCCTCTGGCCTTTTTCTTACAGGTTCTTAAATGCATCTTTTTATGTTCTG  
TCCTTTCTCTGTACGAAATGTCTTTATACACTCAGATCTATTAATATATTTTAGTAAAGATATTGGTGGTTTTCTCCT  
TGTAAGAAGTATAAATGTAACAAAATGAACAATAAATGTTTGATTTGATGTCCAGT

>Sequ11081EST3

TCCTGCGTGTCTGACCTTCATAGGAGTAACCATGTTTCGCCAGGACCAGCGCTTGGTGTCTCCCCACAATGTGGGCA  
GGTCAGGAACATGGCTACCTTGAAGGACATCACCATTTCGGTTGAAGTCCATCAAGAACATCCAGAAAATCACAAAGTC  
CATGAAAATGGTGGCCGCTGCCAAGTACGCTCGTGCTGAGAGGCAGCTGAAGCCAGCCGTTTATGGCACCGGTGC  
TCTGGCTCTGTACGAGAAGGCTGAAATCAAAGCTCCCAGGACAAGGCCGCCAAGCATTGATCGTTGGTGTGACCTC  
TGACCGTGGCCTCTGTTGTCATCCACTCTGGTGTGGCTAAGGCCATTAAGAGCGAGATCGCCAACCTGACTGGCGC  
TGGCAAGGAGGTGATGGTGTCAATGTGGGAGACAAGCTGAGAGGCCCTGTCGCACAGAACTCATGGAAAGCACATCAT  
GCTGAACGTCAAGGAAATCGGCCGCAAGCCCCAGCTTCGGTACGCCCTCCATCATCGCCACCGAGCTGCTCAACT  
TGGATACGAGTTTCAGCCAGGCTCCATCATCTTCAACAGATTTCAAGTCTGTTATCTCATACAAGACGGACAACAAGCC  
TGTGTTCTCCACAGACATCGTTGCCAACTCAGAGAGCATGGGCGTCTATGATGACATCGATGCCGACGTGCTGAGGAA  
CTACCAGGAGTTTGTATGGTCAACATCATCTACCTGGCCCTGAGGGAGTCTCCACAGCAGAGCA GAGCGCCAGGAT  
GACTGCCATGGACAGCGCCAGCAAGAACGCTTCCGAGATGATTGACAAGCTGACCCCTCACCTTCAACCGTACCAGACA  
GGCCGTATACCAAGGAGCTCATTGAGATCATCTCCGGAGCTGCTGCTCTATAAACGGGCCAGGTTCATCGTTTTCCAT  
TGCTAAAAGCTCTCAAAAAAGTACTTCGGACAAGTGTGTCGAGAGTCAAAATGAACATTTGTGCTTCTATTTGTA  
AAATATATGGAGAAAATAAACCTCTTACACAGAACCTTCATCCTTTCTCAGTCCCTGTATCTCATTCCTCACAAATA  
AACCTGACGACTGAGAAAAATGAATGTTGATGCTTCTCTTCTGAAGGTGTCGCTACTTTTAAATCATCAGTTTGTG  
TTTTTGAATTTCTCTAGAAAAGGAATTTAGTCTCAGACGCTTAAAGATTGTTTCGACGGTGAATTTATTCATGTGGATT  
GTAATCTAATTTATCTCAGTTGTGTTATTAACAGAGGATGGACAAAATAGCTGAAACACGTTATGTAATCCAAAC  
AATAATAAATAAATAAATGCCACCTCTGGGCTCTACACTGG

>Sequ11087EST3

CACACACACACACACACGAAGGAAGGACAAAATAAATACACTTCTTTACCAGCTGTGTTAATACAAAACCTTATAGTGT  
TGTAGTCTGAATTTGTTAAAAGTCATGCTTGATTCCATGAATGAGTCCGTCATGTTATGTGTTTCATGATGCA  
GTAATAATCACATGGTCTCTGCTCCCACACTGAGAGGAGTCGTTAGTGAATACAGGCTGATGCTCTGGGTTTTTACCT  
GCCGCTGAGATATTTAAAACAGGACAAGAGCTAGGAGACGATCAGAGTGACACAAAACGAATAAGGCAGTGAGG  
GTCTCGAGTCTCTCCCTCGGACTAATGCTGTCCCGGCTTAGCAGATCACATAACAGATACTGACGACACGTTGCC  
GACGCTCACTTACAGGGGACCAGTGCAATCAGGGTAAACAAGGTCACAGGTGGCGTCCAGTGATGCTCTGGACTC

TGTTATTGTTGTGTTTTCTCTCTGTACAGGTTGGCTTGTCTGTCTAGTAAACAGGGATGTCCCCCCCCGACCCCC  
CCCCGGTCTTTTTTAGGAATGACTTCATCTCCTGGAGTCTGGGGCTCGCTCCTCCTCCCCGCTGCAGTGTAGTTCCA  
TCGCTGTGTAGACGCTCTCTGTGTGCGTGAGGCATGTGTTTTAGTGTGTTTTGTGTCTGTGTGAGGCGTCAGAGGCG  
ACATCACAGCTTGGCCTTCAGGTTGTCTGCCAGCTTGTCCAGGAACCTCAAAGGTGTTCAAGTAGTCGGCAGCAGTCC  
ATTTGGCATTCTTTGATGCAGATCGCCAAATCCTTGGTCATGAAGCCGGCCTCGATGGTCTCGACGCAAACGGCCTC  
CAGCGCCTCAGAGAACTCGCAGCTCTGCGTTGTTGTCCAGCTTCGCCCCGTTGGAGCAGACCCCGCTCCACGCAA  
GATGGAGGCTATGGGGTTGGTGGAAAGTCTCCTTCCCCTGCTGGTGTCTGTCTGTAGTGGCGGGTCACTGTGCCGTGGGC  
GGCCTCCGACTCCACCGTGCCTCCATCGGGACAGATCAACACGCTGGTTCATGCCCAGGGAGCCGTAGCCTTGTGC  
CACGGAGTCAGACTGGACGCTCCTCGTGTAGTTCTTGCAGGCCAGATGAAGCCTCCTCGGACTTCATGGCCTGGGC  
CACCATGTCTCGATCAGACGGTGTCTGTACCAGATGCCTTTGGCCTCAAACCTGAGCGCGGTACTCCTTCTCGTAGAT  
CTCCTGGAAGATGTCTTGAAGCGGCCGTCGTACTTCTTCCAGGATGGTGTCTTGGTGTCTGAGGTAAAGCGGCCAGGC  
TTTAGTCAGAGCCATCTGGAAGGAGCTGTGGGCGAAATCCTGATGGACTTGTCTGTATTGTACATCCCCAAAGCCAC  
ACCCCTGTGCCCTCGAACTCGTGCACGACGAATTTAACTGGCTCTCCGCTGGTGGGCGGTGTAGGTTCATCTCCACTTT  
CCCGGGCCCGGGCACCACAAAGTCTGTGGCTTTGTACTGGTCTCCATGTGCATGTCTGCCGATGATGATGGGTTTGG  
CCAGCCGGGACCCAGGCGGGGGATGTTCTTACAGATGATGGCCTCTGAAACACGGTGCCACCCAGGATGTTACGGAT  
GGTCCCGTTGGCGGAGCGCCACATCTGCTTCCAGCTTGAACCTCCACTCGCTTCTCATCTGGAGTGTGGTGGCGCA  
CTTGATGCCACGTTGTAGCGGCGGACCGCCTCCGCCGATCAACCGTCAACCGGTCTCGTCCGTGGCGTCTCGGTTCTC  
CATGCCAGGTCTGTAGTGTGCAGGTCCAGCTCCAGGTAGGGGAAGATCAGCTTCTCCTTAATGAGCTCCAGATGAC  
CCGAGTCATTTCTCCTCGCATCTCCACCACAGAGCCTGCCTTGATCTTCTGAGACATGTCCGGAGCCTTGTTTTAT  
TCAAACGTCCACAACAGAAACGGCGAAACGAGATGAGGAGGCGGACCGACGTCGTGAACCGTAGCACAGGTTGACTGG  
GCTGGGACTGCCGGAGGAGCAGCGGCAGGAG

>Sequ11088EST3

TTGGAACGCACCTTTTCTACAGGAAGTGACGTACAGCGTTGTATCGGGTCTTCAATTTTTGTCTGTGGTAGCAGCTTC  
GAGAACCATCCAAGATGACTACAGCTGCAAGACCAACATTTAGCCGGAAGAGGGAGAGGTAAAGGAGAAGGTG  
ATCTGAGTGTCTCTCCAAGCAATATTTCCAGCCGAGATCTTCCGGGTCACTAAGATCAAGTACAGGCAACCTACCC  
AGGATGCCCTGAGGAGGTGCGTGGCGTACTTCCGAGGGAGCTGGAAGAGAGGGAGCGGTGTAGCTGCACGTGATA  
AGACCAGAGAGGGGAGCCAAAGAGAGCACACCACATCATCTTCTCGTATCATCTTCAAAGAGGCCAGACTGG  
ATCAGATCCCAGCAGCCAACCTTGATGCAGATGACCCTCTCACTGATGATGATGAGGACGAGGACTCTGAGGAGGACA  
GTGATGACGATGACACTGCAGCTCTTCTGGCAGAAGTGGAGAAGATCAAGAAGGAGCGGGCTGAAGAGCAAGAGCGCA  
AAGAGCGAGAGCAAAGGCAGAGGAGGAGAGGATTGCGATGGAGAATATCTTGAGTGGCAATCCATTGATTAATTTGG  
CGGGGCAACAACAGCAACAACAACAACAACAACAACAGCAGCAACAGATGAACCAGAGTCAGAATACATTTAGGGTCA  
AGAGAAGGTGGATGATGATGTTGTGTTCAAAAACCTGTCTAAAGGAGTGGACGAGGCAAGAGAAAGCAAGCTTCCG  
TCAATGATACACTGCGCTCGGAGTCCACAAAGAAATTTATGGAGAAATATGTAAGTAAAGTAAAGTAAAGTAAAGTAA  
TTTACTGTTTCTTTTTTTTTTAATCTAATTTCTTTGATCTCCTACTTCCATTTGTTTTTTAGCATTTAAATTAAT  
GCATCAGTCTCTGTACAGTCAACAGGTAATAATGTTGTATATAAATGAGTTGATGAGTTACATCCTTTGAACAAAGCTC  
AAAACAAGGTGGAAT

>Sequ11139EST3

GCACGTTGAGCGCGGTGGCAACCTGAAACC GCCACAACAGGAGGACCCGTGACGTCATATCTCAGCGACGACACGT  
CTTCAGATTGCACCATGGCGGAGGCTGAGTCAAAAAAGGTGATCAAGTTAGTTCTCCTGAGTATCTACTGAAGAAGAGGA  
AAGCTTACCAGGCCATTAAGCCACACAAGCCAAGCTTGCACCTCTTGAGAAGAGAAAGGTATCGAAAGGCCAAACCAT  
TGAATTTCAAACGTTTGAAGACTTCTTGAAAGCCAGCCACAAGAAGCATCGTATGAAACTCGCATCCGCAGAACAC  
AGCACAGGCCCGCTGCCCTCTGCCTCCTGCTAAGAATAAGCTAGCCTTTGTTGTCCGCATCAGAGAGATTAAGGTG  
TCAGCCCCAAAGTGTGATGAAGGTGATCCAGATGTTGAGGCTGAGGAAGATCTTCAAGCGGGCCTTCGTCAAAATCAACA  
AGACCTCCGTAGCGATGATGAAGGTGGTGGAGCCTTATGTGGCCTGGGGGTTTCCAACTTGAAGTCTGTTCTGTGAGC  
TCATTTGAAAGAGGACAGACCAGGATAGGCAGGAGGAGAGTCCACTCACAGACAACGCCTTCATTGAGCAGCACA  
TGGGTAAACACGGCATCATCTGTCTGGAGGACCTGATCCATGAGATCTACTCAGTCGGTAAGGGCTTCAGGGCAACCA  
ACAACCTCCTGTGCTTTCAAGCTGTGAGTGGCTCGTACGCCGCCAGGGATAAAGCTGGGCTCC TGAAGGACCTGG  
GAAACCCCTGGATTTCTGTTGACGGACATTAACACTATCATCAGACAGCTGAACCTGAGGAGAAACGCTTGAAGATGGA  
CACCACGGCATCTTACAGGATGCTGACTTCTGAGGAGCAACGCCACTGACAACAAAATATTTAAATTTGTTTT  
CATTTGGCAGAGAAGCTTGTGGGCTTACACTGTACTGATCTTCTGGTTACATTTCTGGACACTGGGAGATATCAG  
AAAAGTGGAGTCTTTCCGTAATCATGTTGTTTTGTTTTGTGCTCATGTTTTATAAAAAATATATATAAACGTGGTG  
CCCCTGACAGTGGACAGATGGAAGCAGCTCTATGGTGAATAATGCTGTATGTTAATTAGTACATGTAATATTCCTCAG  
GTTGTCAGAGGAACGGATCAATACTTTCTACATATAACAAGGACAGGAAATGATTAATTAGGATGAGTTGTCCTACGT  
GCAGGAGCCACCAGCCATCTACAGCAAATTCATTTACTGCAGTCAATAGGTTTCAATGTGAAAAGGGGTAAAAAAT  
CTGTTTAACTGATTCACTGATTGATTGACTGTTGTACACTGTTTTTACAATAAACAATAATATTCAGTACT  
TTTGAGTGATAGCTACAATGTTTGATACATAATGAGAGG

>Sequ11146EST3

ATGCTGGCGAGCATGATCTTCAGGAAGGAGCCCTTCTTCCATGGCCATGACAACCTATGACCAGTTGGTGAGAATA GCC  
AAGGTTCTGGGAACCTGAAGACCTGTACGACTACATTTGCAAGTACAACATGAGCTGGAACCTCGTTCATGACATT  
CTGGGAAGCATTACAGTAAGCGGTGGGAGAGTTCTGTCCACAGTGAAGAACAGCACTTGGTCAGCCCCGAGGCTCTG  
GATTTCTTGGACAAGCTGCTGCCTATGACCACCAAGCCCGGTGACCCGCCATGAGGCCATGGATCAACCTTACTTC  
TTCCCCATTGTGAAAGATCAGTCTCGTGTGGCCGGATCAGCCAACCTGCCCAGTGGGAATACAGCTGTTAGCACAGCC  
AGCATGATCACTGGTATCTCTGCCTTGGCAGCCTCCACTGCCCTGGGCCCTCTCATTGGCAGCCGGTCTGTCTGCT  
GCCACCAATGCCCTGAGCACCCCGGTGCCCGCTGCTGCCGGTGGCCACAGTGACACCCCATCTAAATCCTCATCTCT  
CCCATCTCCACCACCACCACCACCAGCTCGGGTGAAGAACTAGACAGGTGCCATTTCTGCCAGCCCTCACCACACCT  
GTCTAACTCAGTGAACCTGGCTGGAGGACACTGTCTCAAAGAAAAAAGCTTTGAGATTTCTTCTTCTTCTTCTT  
AATGAACGTTAACTGACATCTGAAATGAATGTTCTGTGTAACCTGAAATATACAGATAATCCCTCCATTTTCTCAC

AAGCTGTAGTGATTACATGGGTGTGTGTTTGTGTGGTGAGTCTGAGAACGAGTGTGTCCATGCGGGATTTGGGTCTC  
ATGACCCGCCAGCCCCACCCATATGTTTTAGTTTTGGACAGTGAAGGCCTGGTCAATAAGTACATCAACAGAAGGCCAA  
AAGAAAAAAGATGTTCAAGAGGAGCACATCCTGTGTAGTTCTACTACTGCAGCTTTGTCATAAAACAACATCTGATGAAA  
ACACTAGTTTTACCTCCCAGACAGCTCTTTACACCCCTCCATGTTGCAGCATTTTGGAAAGTGTGGTGTCTGTCTGT  
GCTCCAGCTGTATGTGAACGCAATGACACTTGAACACTTTCTCTGCCTGAGTAGTCTGTCTTGCCTTTCTTACCACA  
CCAGATCACCAGTCTTCTTTGATAATACGACTCCCCGTATGTCATCCATTATTAACCTGTTTTGTATTGCAATGTT  
GTGGACTGCTGGATAAGGTTTACCTACCATCAGGTGGTTTTGATCAACTCTAGTGTGTACTCTGATCTCTTAAGAAACC  
AGGTAAGTTTCATTCAGGTTCTCAAAGAAAAGTTTTCTCAAACGTGCTGCTTTCCAGATCCTTGAACCTGCTTCAAGTGGC  
TTTTCTTGAATTACTCCAAGACATAACCAAAGTTTTACCCAGATGGTTGGAAGAAGAGACTCAGACCTAGTTTTATTTGT  
GGAAGTTACTTATGGAGACGCCCTTGACACAGGTTGAAAGTGTGGGTTCTAGTGAATAAGATCACGGCATGATACAATA  
ATCATCTGCAGGTGACTGAAGTGCTATTAGTGTGTGACACGGGTGAGCTTAGTGATGAGTAATACAGTTAATTGGCC  
TTCACCACCATGTTGAGGGAAGTATTGAAGTTGAATTGTTGAATAGCACTTGAAGGGTAGCGTGTGCGCAGTGT  
AGTGTGACAGTTTTGAAAGTTTAAAGTTTTAGACCCTGCAGTACATACGCATCTTTTATTTTCCCATTACAAAACCTTA  
TAATGCAATAAATCAGAAAATGTATACGTTGACCTGTGAACAGAGCAGTTCGAGTCCCTACATCACTGTATA TATTT  
TTATGTTCTTATGTAGAAGACTAGTATTTGAAAATATTTGTGTAATAAACACGTGTTAATTATCAGGTACATCTGA  
CTGATTTATATGTCATGTTTCATACAGACCACTCTTCTCACACACACTTTCCTCACAGCATCAAGGTTACAGAGTGCAT  
ATGATCA

>Sequ11147EST3

GCACGGCGACTTAAACGCGGGAGCACCCGCTACAGAGAGCCAGCACCCAGCCAGAGGCTTCTAGAAAACAACGTGCACCGGG  
ACAGTACCAGCGCAACACACTTGTCTCCGCACGAAACGTTACACAGTATAACTTTTTTTATTATCATTTAGCTGGAT  
AAATGGCGAAGTGGGGAGAAGGGGACCCTCGCTGGATTGTAGAGGAGAGAGCGGATGCGACTAATGTCAACAATGGC  
ACTGGACTGAACGAGATGCAACAAACTGGTCTCAGACAAATTAATAATCATTGCTCCTCGGGTTGAGCGTGGAGAACG  
AAGACGGGACGTGTGAGGTGACCGAAGTCAGCAAGCTGGAGGGAGAGGCCCTCGATTAAACAACCGCAAAGGGAAACTTA  
TTTTCTATGAATGGAACCTGAAAGCTGCTTGGACTGGAAAGTCAAAATCAGGAGTGAATTATAAAGGAACACTTGAA  
GTTCCGAACCTGTCTGATGAAAACGACATGGAGGATCTTGATATTTCTGTTTCGTTGAACAAAGACGAACCCGAAACG  
CCGCTGACCAACCTGATGAAAACGAAAGGAGCTGAGAAGGTGCGTGAAGCCCTGGGAAGCTACGTCGAGTTCTTAAAA  
ACAGAGTTCACGCAGGGAATGATCCTGCCACAGCCAACGGTGTGGCCAAAGCCGAGTCCACATCACAGTCCAAAGCC  
AAGCTGGATAAAAACCTCAGATTTTCTCCTCAGGCAGCACCACTGCTCCAGTCAACACCGGCGTCAAGATCCCCACCTGT  
AAATTCAGCATTAGAGAAACGTTTCTCACCTCACCCAGCTGATCTCTACAGGGTGTCTCTCAACCAGGAGATGGTCCAG  
GCGTTCACACATGCTCCAGCCACAGTGGACGGAGAGAGGGGCGGAAAGTTTCGCTGTGTAGAAGGAAATGTTTTCGGT  
GAATTTACGGAGCTGATACCTGATGAGAAAATAATTATGAAGTGGAGGTATAACAACCTGGCCCTGCGAGCATTACGCA  
ACAATCACCATGACCTTCTTGGACCGGAGCAGCGAGACGGAGCTGAAGGTGGAGTGTGAGGCGTCCCGGAGAGCGAG  
GAGGAGCCGGACGAAAGAGGGCTGGAAGAGATACTACTTCGAAGCTATTAACAGACTTTTGGCTACCGAGCAGCGACTC  
TTCTGAAGACGGCGTGTGTAGTACTGTTTTCTTTTTCTGTTTTTTGGATTTTTAAAACTTCTTGTCTTTCGATCTC  
TCTGGAACGAGAAGTCCATTTGTAACCTCATAGCACGAGTTAACGAAAGAGAAGAAAATAGGTGAGGCCAGCCTGTC  
ACCTGTCTGTGTACGTGTAATGTTTTAATTTCTCAACATATTTAAATCTAGTTTCTCCCCGTCAGTATTTGGGTGAG  
TTTTTAAACCGGAGCGTAAATGGACTGTGCCTCTGGACTCTGGATGAAAAATACATTGAATAAAGCAAAGGAGAATTT  
ATTGAACCATAATGCAAAATGGCCTTTACTTCTATAAATATGTAATTTATGCAAGAGTTAAAAATAAATGTTGTTTT  
TCTTTTTATTGAAAAAATATTCTGTTGCTTTGAAAAATGAATGTTTTTACTTTTACTTTTATTTCAAGTTGATA  
CTGTAGTGACGATGCTTTCAGCCGAGATGCATGTTCCATTTCAAACCTTCAGAGGGAGGAATCACCACTGGACTTGAA  
CCTTACACGTGTTAAATCTAAGCAGTACTGTACGTTTCAAGTGTGTTCAATGAGACTTGATTTTATGCACATTATGAGCC  
CAGCGTCCGTCTGGGGATCAGCTCAGCTCGGACCTTCAGCGGGAGCGTTAAGGCAAATGTTTCAAGTGTGGAACAT  
GAAAACAGTTTCAATCTCTTATGCAGGTAGCTAGCGTAGCAACTAAAGAGAGATGTTCTGCTATATTTGGCTTCAAAC  
TGTAATTTCA

>Sequ11170EST3

AAAGCTGAGGAAGAGGAGGGAGTGGCAGAAACTGCTCAGCCAGAGGAGGAAAAGGCAGGACCTTTCACAGGGAGCTGTG  
GAGGAGAGTGACAGCGACTCAGATGACAGCAGCGACGATGAGAAGGAGATCACCAGGATGAAGCAGGCCAGGGGGGCT  
GGTGGGACGTCGGGAGGAGCCGATGCTGACGACTTCCAGTTGTTCTGTAGAAAAGCACCAGTAAGAAAAGCCAGGATC  
CTAGATGACAGAAGGCTTGGCCTCGGCTGTGCTCAGTACGCTACGCTAAGAAGAGAGCCAGGGACCTGGTGGACAGCTCC  
TTTCATAGTTTTGCAAACTCCGACGAGCGTGAAGGTTTCTGAAATGGTTCTTGGACGATGAACGCAACAGCGGAAG  
AAGCCAGTGCCAGTCAACAAAAGAGATGGTGGAGGAGTACAACAGAAATGGAAGGAGATCGATTCCCGACCTATCAAA  
CGAGTTGCTGAGGCCAAGGCCAGGAAGAAGAGGAGGATGCTGAAAAAGATGGAGCAGGCTAAGAAGAAAGCGGAGGCA  
GTCGTCAATACAGTGACATCTCTGAAAGGGAGAAGATGGCTCAGCTAAAGAGTATCTACAAGAAAGCAGGGGTTGGA  
AAGGAGAAGAGAGAAGTAACATACGTTGTGAGCAAAAAGGGAGCCGGCAAGAAGGTGAGACGGCCACCTGGTGTCAAG  
GGAGTCTTCAAAGTGGTGGACAGTCCGATGAAGAAGACATGCGGGAATGCAGAGGAAAGACCAACATGCTAAAGGA  
GGCAAAGGAAAAGGTGGCAAAGGCAAAGGCAAAGGAAAGGCCGTTCAAAGGTTGGCAAAGGAGGAATGAAGGGTGGTAAA  
GGGCGAAAAGGAAAATAAATTTGAACCCACAACATTTCTGCAATCTTGCCTTTCTATCTAACGATTAACATTTGCCTGG  
ACTCATGTGTGACGTAAGCATTTATGGAGCTTTGTGAGCTGAGATGGGTCTCACACTTTGGGCTCCTGTATCATGGA  
CACAGTGAACCTTTGGTCATTGACATGGATGCCCTCTTTTTAGCAACCTTCGCTGAGGTTCCTTAAACCCCTGGACACT  
AGAGATATGATCTACAGGTATTACAGTGTGTTCTGGTTACATCTTCTGAAGATGTACATTATCTGCCTTGAGC  
TCCTCGAATGGAGCTGTTTCAACCGAAG

>Sequ11176SNP3

CTGTTTTCTGCTGTGGCACCGGTAAGTGAACCCGATGTTGTCTGAATGTCAAAGATGGCGACGGACATGTCACGCTGAA  
CTCGTAGCAAAATGTTCCACAGTATGATTTTTAAGGATATAAAGCCTTACCAGATGCTAGCACACTGACCGACTCTGTG  
TTTTAGTTTTGTGAGGTGAACACAGCTGAGGAATAAATGGCTCTGAGTGATTTAAATCGCTGTGTGCGCCAGTTGTTAG  
GTCAAATTCACGCTGTGCCCCGTTGACGCTACAACCCAGCAGCTCGGTGCTCAGCCAAGCAGCTCTCAGCCGG  
AGCCCAGCGCAACGAAAATGAAGCCGTGAACCCGACTTTGTGAACAGAAAACCCCGGAACCTGGAGCAGATGGCCG

TGGCTGTGAAGGACCGGGGCTGGAAAACGACCTGGCCCCACCGGGAGTTCTACCACAGGTTGGTGTCTTCTCGCACCC  
AACATTATGTGACAGCACAAGTGTCTCCAGCAGTTCTCCTGTCCCAGTGTGACCTGCTCAACCACAGAGTGGGCAT  
TGAAAAAGGAATGGCTTCTACAAGGTGTGTGGCAGCATGTCCAGGCTGTGGGTGAGGTGCTGGCAGCTCGATGTCAAC  
AGGCTGGCATACCAGGATGGTGTACAGGGCTATTCCCTGGGCCATCGCTCTGACGCTGTTTCAGGCTTTTCAGGAAAG  
GAATGAAAGAAGGAGGAATCACGCTCAGTGAACCCAGAAGAAAATACATTGGGACCTAAATTTTTGTGTCTATCTATCA  
CATCTGCTGCTTTATTTAAATATCCTCTGTAACCTTATTATATCTGCTATGTTGTGAATTTATCACTGTACTGATAT  
TAAGATGACAAGCACTACAGTGAATACAATACAGAGAATCAAAATGAGCGCTGAAAGTAATGTTGCTTGTCCCTCTG  
CTTTGTTTTCATGTGGATAAAGTGTCTTGAATATAACCAGTCTGCTCTCTGCTCTGGTGTGTTATTTAATCAAGGA  
ACAAAGCAGTTGGTTGAGGATAATCATTTATTTTCTACTCATAGTGTCTGTTGTAACAAGAGTGTGGTGCAGACAG  
TGGAGGCTAAACATAAGAAGGCATATAAATGTT

>Sequ11252EST3

AGAGGCTACTCTGCTAAAGCGGGAGAGGGATTAAAAACAACTGCGAAGAAGACTGCATTTCTTACCAGCCCACCAAAC  
TTTGTAGCAGACACTCTGTGCTTTCCGGTCGAGTTAAACAGGAGGAGAAACACACTAAAAAGAGTTTCTACCAGCATG  
GACAGAGGGCCAACAGAGGGTGTAGGGGTGGTGGAGGTCCCTGCCAAAGACTTCCCCTCCATCCAGGCCGTTACAGC  
CAGGATGCCATGGTTGCTGACCTCCTCCAGCAAGCTGCAGAGGCCGGGGTGTGGTAGAGGGACAAGCTGGAGTCGTC  
CTTGAACAAGTTCATGGAGAAGGAATGGTATCAGCCACTCAGGCCAGCAGCAGCTGATGGGAGCTGGGGTGGGGT  
GGTGTAGAAGGCGGAGCAGGGGTTGAAATGATGGTTATGGACTCACTGGATCCCACCCTGTTGCAGATGAAGACTGAG  
GTGATAGATGCTGCAGTGGGGGGATCATCAGCAGCAGTGGGTGTTGTTGGAGGGTTCGCTGGTGTCTCACCAGCA  
ACTGTAACAACAGTGGACCAGACCCAAATTTATCACACTACAGGTGGTAAACATGGAGGAGCAGGCAGCCCTGGGCCTC  
GGGAGCTCCAGCTGGTCCAGGTGCCTGTTTCTGCCACCACCCTGGAGGCTCTGCAGCAAGGCACCTTTGTAGACACC  
ACTGCAATGCCAAAGGATGGAGACCCAGTCACTGCCACACCCTGCCCTTGC CCGAGGGCTTTCAGGTAGTCAAGGTT  
GGTGTAAATGGGGAGGTGGAGACAGTGAACAGGAAGAGGGAGGGAGAGGGCCCAAGAGGAAGAAGATGAGGAG  
GTGGGAACCAGCTGCTGGAAGAAGGGGAAGATGAGCCATTTCAGCTCCGAATGATGACCCAACTGGGCTAAAGAC  
CCAGACTATCAACTCCATCCGGAGCAGTCAAGAAGACCAAAAAGGGTAAAAAGAGTTCGCTGCGTTACGCTGATGGA  
GATAAGGACATGGACGTCAGTGTGTATGACTTTGAAGAAGAAGCAGCAGGAGGGCCTTCTGTCTGAAGTCAATGCTGAG  
AAAGTGGTGGGCAATATGAAACCACCCAAACCCACAAGATCAAGAAGAAGGAGTGAAGAAGACGTTTCAGTGTGAA  
CTGTGCAGCTACACCTGCCCGGACGCTCCAACCTGGACAGACACCTGAAGAGCCACACTGACGAGAGACCTCACAA  
TGTACCTGTGTGGAAGAGCCTTTAGGACGGTACCTTGCTAAGAAACCATCTCAACACACACACCCGAACTCGTCCA  
CACAAGTGCACAGACTGTGATATGGCTTTTGTGACTAGCGGGGAGCTGGTTCGTCATCGCTACAAACACACACAT  
GAAAAACCTTTAAATGCTCGATGTGCGACTATGCCAGTGTGGAGGTGAGTAACTAAAGCGTCACATTCGTTCCAC  
ACCGGTGAGCGTCCATTCAGTGCAGTCTCTGCAGTATGCCAGCAGAGACAGTACAAGCTGAAGAGACACATGAGG  
ACACCTCAGGAGAGAAACCTTATGAGTGTACATCTGCCATGCCGGTTTACCAGAGTGAACCATGAAGATGCAC  
ATCCTGCAGAAAACACACAGAGAATGTGGCCAAATTCACCTGTCCACACTGTGACACTGTGACACTGTTGACAGCA  
TTGGGTGTCCATCTTCGTAAGCAGCACTCATTTATTGAGACTGGAAAGAAGTGTGCTTACTGCGACGCTGTTTTCCAC  
GAGCGCTATGCTCTGATCCAGCATCAGAAGTCCCATAGAATGAGAAAAGGTTCAAATGTGACATGTGCGACTACTGC  
TGCCGCCAGGAGCGCCACATGGTGTATGCACCGTCCGAACCCACACCCGGAGAGAAACCATATGCCTGCAGCCAGTGTGAG  
AAGACCTTCAGACAGAAGCAGCTGTGGACATGCACCTTCAAACGCTATCACGACCCCAACTTTGTGCCACCAGCCTTC  
GCTGCCCAAAGTGTAGCAAGACCTTCACTCGCAGGAACACTATGGCGGCCATGCTGAGAAGTGCAGTGGTGGAGT  
GAGGATGCCGAGAAATGGAGTCCAAACCCAAAGAGAGGGGAGAAAGAGGAAGAAAGAGGAAGATGAGGAGCAGGAGAT  
GAGGATGACAGCGAGGAAGATCACGTTGAACCTGACGAGGAGGAGGAGGGTGGAGGTGAGGGTGGAGGAAGAATCATCA  
CTGCTACAGGAAGAGGAGGAACAGAGGGTATGGAACCTGGACCAGGCCCTGCTGCCATTCCTGTACCGGCCCGGACG  
AGCCACCAGTCAAGAGGAAACGAGGCAGACCCCGAAGAATGCCCTAAGCCTCCCGCAGCCAGCAAGCCAGTCAGGG  
TGGCTGCCAAGACAACAGCTTCTGCTGCTGCCATCATTTCAGGTGGAGGATGAGAGCACCGGAGCAGTGGAGAATCA  
TAGTGAAGAAAGAGAGGGGCGACGCTCTGCAGCGACACCCCTGGAGCAGGGAGTGGCCCTGACAGTGGAGGGGTGGG  
CTAGATGGGGACGGGTGGAGACTGTTGAGCTGGTGTGAATGAGGAAACGGCAGCCGCTGCTGCTAATGGAGCTTGA  
CGCCAGAAATGATCCTCAGCATGATGGACCGGTGAACACATCACAGACGCACACACGCAGTCGGACTCTGTGAAAAAT  
TGGCGAATACAAATTAACGTTTCTGCATCCTCAGCCTTACCTCATGTTCCATCTGTGTGTGCGCTTAAGTGGCAGCC  
ATTTTGCCTTCATGAGTGGCTGCAAAAATGGTGACAGCAAAAACAACCATGCACAAAGTAAGGAAGCCACATGTAA  
ATACTTACACAGCAACTTCACATCTACGTATGTCAACCTGCAGACTGACGTTTGTGGGTCTCATAACAAAAATCCCC  
TGCATACACTGTGCTCCTCCTACATCATATAAGGATATTGTCCAAACTAATGACTGACTGCTCTTTGCTCTTAAAT  
GCTTTTTTCTGCTGAAATGCTTCTGAAATGAATGATGTTTTTGTACTTGTGTCTACCCAAAGCCACATCTGT  
GTCAGTCTCACCCACACCTTCTGCAGTTAATTTCTCTATGTTGCTCTGCCACAAGGGGTCAATCTTTTCATCCACTTT  
CTCTTTTTACTTTGTTTTTCTGTCTGCTTGGAGTTTCTGCAGCTTTGCTGATTTAGGAGATTCCAAGCCTTTATTTG  
TGTACGTATAGATCTAAATGTAGTTTTTTCTAATGAAAATGTAGTGTATGGTACTTCAGTTTGCCTCTGAGATATCA  
CCTGCTCTCAGTCATGATCTGTATATTTTTCTTCTTGGCCTGTGTAACACATGGTCTGTTATGTTATCAGTCAGT  
GTTGTACATTTGACAGAAGGATTTTATAAATGAGCTAATGAGGCAGGTGATTTCAAATGAACATAAGTCAAGTATA  
ACTTTTTCTCAGCTTCTAGTTTCTATCATCCGATTGCCAGCACCAACCCCTGTTCTTATGAGACTTGCCTCAGTCA  
GCTCATGTACATTAATACTTGGAGTGTGTTCCAGAACCAACAGAGTGTGAGATGAAGCTATTTTTGACTGTTTTT  
TATTTTCTGCGACCTGTCACTGACAAAAGATACTTCTCATTCGTAGCTAGTGTCTCCTGTTTGGAAAGAGAACATAG  
ATAGTTTGGCATCAGATAAAGTGAATGATCCCTGCTGGATGGAGAAGATGCAGATGATCCTGATTGTTACATATTGAT  
CATTGAACATTCAGATACTTGAAGTAAATATGGAATATGCTGTGCGTTAGAATCATCTCATCTGAAGAACCTCGGA  
GTAACAAACTCAGTATTCACACCCAGTTCACACTGTGTTGGAACAGTTATCAAAGAGGTTGTCAATACCCCTCCCC  
GCCCTCCCCACAATAATGATACCAACTGTGGCAGGTTGCAATGTAATAACATCATATTTTAAACCTTTTGC  
TCTTTGATTTCTGGTGAACCTTTTTAATGTTTTTAAATAGCTGGTTTTGGAGATGTTTTGGTAAAGAAGGACATCATGG  
TTTCACTTGTGGTCAACATGTGACTGTGCTGGTACTTGCAGTCTTCAGCTGTAAGGTTGCTTTTCTTCCACA  
GATGAACCCATCTTAACCAACCGTGTGACTTGAACATACTGAATCACTATGGTTTTCTGTCTGTATTCTGTTGCTC  
ATAGCCATTTTCTATCTGCTTTGATACTGTTTTTAGTTTTTCACTTCTAGCCATTCCTTTGAGTGGTCACTGGGTTT  
CCTGCAGGCTGGTTGGTTCAAGTTCAGTCTATGACAGAAGCTTTGCTCTACTCTGTCTCCTTTAACCTTTGGCCCAA  
AGGCATGAGGCTTTCATCCATGAAGGATCGAGAGGTTTTTGTAGTCTGCTGAAAGACAAAACCTGTTTCACTGAATGA

AGTTCAGCTAGTAAATTGTAATTAATGACAACAAAACAGCCTTCATGGTCTTTTTGACAGGTTTTAAAAC TGTTTTTA  
GAAGGATGACAGTTTTGTGGAAGCTGTGTATTTTTGCTGTAATATGATTAACATATGTAATCAAGAGGGCTAATCCACAC  
TGTTCTCAGCCTGGACTAAGGCCCTGTTAGCCCAGGTTTTGCAGCTCCACTAGTATTTTTCAGTCACTGTCCATTTGCC  
ACTGATTTAAGTTATGTCCTAACCTCAGCAGAGGCAATCCTGATCAGAGCTGTCCTGATATTTTTTTTTTATA  
AAACACAGAATAAAATCACTCACAGGAATTTTTCACAGTCCGGATCTCAACAAACGTGAATATGTTTCATCCTCAGACT  
CGGGCTAAAAGTTCGGGGTTTTGACCACAGGTTATGATGGTCGTTATGTGGCCTTCATTTTTCTTTACCTGTTTTTGT  
ATATATAACATCTCCTCTGTAACATGACACTGGTTAGATGCCAATATTAATGTAATAATGAGGATCTAAAGAACCA  
TGGTCACAAGATATCTGAGGGAATCAATGTTTCATGCATCAAACCTGACACTGTATGTTCTGTGACTGTACTGCTGTGGT  
CTGTTATCTGTCAATCATGTTATTCTGCAGACGGACAGATGATGCTTCGCTGTTCTCATAGCAACAGTATTGTTTTGT  
CTTTGCACATTGCTTGTGTTTTGTTTGGC

>Sequ11253SNP2

CAGTCTCGTTTTTTTTTTTTGTTTCAGCTTCCTGGAGAAGACATTCCTGTTTCGTTTATTTCGAGCCCAACATGGATGTAC  
AGATTGAATTTGTTTCATATGAGTATGTGAATGTACATGGGAAGTAGAGAAGTTCTACATTATTATCATGTGTTTCGCAG  
ATGCTGTTGAATTACCGTGAATAATTAAGAGGAGCAGAAATAATTCATACAAAACAGAGTATGTTTCAGAAATTAATA  
TGGAGCTGTATAGCAAGTAGGAAGCTTGGCTACAGAGCAGCAGTTGCACAAAAGTCAAACAACACAAGACAAGACCA  
GGATTTCAGAAGATATAATCCAAGATGGAAAATGCGGTCTTCAGAGGAGGGTTAAAGCTGGAGATCTTGGCTTGGTCT  
CACAACCAAAGCAGAAGTATTCAAAAATTCAAAAATAGAAACAAAACAAAAGTCTGACACATTTTCTTACATCACTT  
ACATGGAGTTAATTTTCAGTTTCATAGAGTGGCTTTCACTCTCTATCAGCTGATGAAGTCACTGTATCAGGGTCGTCT  
GTGTGTGGACGATGAGCAGAGGGTTTTCTGCGAGGGCTCAGCTCTAAGAAAAGTCCCACCCTGCTCTTCCCAGATGTTG  
CTCCAGCTTTTGCCTCGGCGGTGCTCAGCTGTGAACGGTCTCTCCCTGCTTTGTAGCTGGAGTCTTGGAGATTTTCA  
GCTCCTCCACCACCGCTCCCAAGCTCCTGGATCAGCTGTCTGGTGTCTTCTGAAGCTGAGGGGAGGGCGTCCACTT  
TCCTCTCCGCGGAGGAGACTGTGCTTGTGGCTCCTGGGGATGGGAGAGGCAGCGGAGGTGGGTTGGGGCTGGAGAG  
GGTTGCTCTTAGACGCTCTCTCCTCCTCCTCCTGGTTGGATTTCGGTGCAGACTTGCCCTTCAGCCTCAGATTCTT  
CACTCTCATCAGACGAGCCGCTG

>Sequ11258SNP2

TAGTAGGAGGTTTTCGGGTTTTTTTTGTAATTTGCATTTATTCTAAAGGAAAATATATAAATCAATAAAATATTGTGGC  
AACAAATCGGCAAAGACATTTTTGAAGGTGACATCAACATTCAGAAAACAAGATAATGTACATGGGGAGGAGACAAC  
AGATTAGAAAATGAAGATAAGAGTCCGGGGCCGGGGGCTCTGCCAAGTGCAGACGCGCCGATTTCAACAAGCTAAT  
GGGGGAGTTTTGAAAGTTACAATAAAAGTGCATCAATGCCTGATATTCAAACAGCTTCTTAATTGCAGTGTAGAGGAA  
AACCACAAATTCGAACACACTGTTTTTCCAGACAAGTTGACCATTTGTTGTTTACATTTTGTGCATGTTTCAAAAAGT  
AACCAGCGTGTAGGAAAAATAAAATCCTCCAATTTTGTAGTTACACCAGAAAAGCGTCTTGAATATGTGGTGGGGC  
CAATTAGTAAACTACTGCAGCTGGCGAGCTAACCGCTAACACACTATCCAGCTGACTAAGCTAGTCAGATACAATA  
GCCCCGTGAGCTAATGTCTATTTTCTCTCTTTGTAAGTATTCCCTCCTGCCATTAATATTCTCAGGATTTTACAT  
CATTTTCATTAATAAAAGCTACTGAAGGGAGGAAAACACTCCATGCTAACAGGTGTGCTAAGTGTAGCTAGCAGGT  
TTTGTGCTAACAGTCAACAAGTTTACACAGTTTAAATCAAAGTCAATCTGTACCAACGAATCCTGTCTCAAACCA  
CCTTTTCTATTTGTGGAGCAGTTAATTAGGTTAAATAAAAGTGAACACAGCTAATTAGCTACGCTAGCTTCTCTAG  
CTCCGTGTTAGCACTGTCAAAAAGCTGTTACACTATCG

>Sequ11268EST3

ACTAGGTTGTGTGTAACGACCCGGCGATGACTAGCCATTAGCTTGTTTTTCTCAAGAAAACTTACACAGTGTTCATCGT  
CTCCGACTGCCTTGTTAACCTGTCCGCTCGAGGCAGTCCCGGTGCAGCTGAATCTCGCTTAAACTGTGACCCAGTGT  
GGAGGTGCACCATTAGGATGTTCTATCAATACCACCACCTCCTCTCCCTCTTCCCCTCCTCCTGCTGCTGGGTGTGG  
GAGTCTCTCGGTGGAAGTGAACGACCTCGCGGTGTACCTTTATCAAACGGCAGTTCATGAAGAGGGCAAACCAT  
TTACTTGTCTGGATAACTCCGGCACTATTTCCCTTTGACAGAGTGAATGATGACTACTGTGATTGCCAGGATGGCTCTG  
ATGAGCCAGGCACTGCTGCTTGTCCCAACGGCAGCTTCCACTGCACCAATGCAGGTTTTCAGAGAAGCCTTCATCCCCT  
CCTCCCGCATTAATGATGGAATCTGTGACTGCTGTGACACAACAGATGAGTACAACAGTGGTGCCGCTGTGAGAAC  
CCTGCAGGGAAATGGGGCGTAAAGAGAGGGGAGAGCCTGCAGAAGATGGCAGAGATCGCAAAGGAGGGCTTTCTGCTTA  
AACAACTCATAACAGGAGGCCAAGAGGGGCTAGAGGATAAGAAGGCCAACTTGTAGATGTTTCAGGTTCAGTAAGA  
AGGATCTGGAAGACAAGGTGGAGCCTGAGAAGTGAAGGAGATGCAGAGCAGCCAGAGAAGAAGCTAAAGAGC  
GCCATCTGCAGGCTGGGAAGATCAAAAAGCTCTTGTTCGATGGAGAAGGACAAGACCAGAATGGCTGAGGTTTTTC  
TTGAGCTTGTGATGATGCAGATGGCTTCTGCTCAGTGGCTGAACTTCTGTCCCATTCTGAGCTCGATCCAGATTTCAG  
ATGGTTTCATTCACCGAAGCAGAGGCTCAGGCATCGTTGGGAGGAATGGACAAAAGTGGACACAGTACATTTGAGGCTG  
TTTGGAAATAACATCAAAGAAAAATACACATCAGAGGCCCGCCGAGACACCCAGCAGTGGAGACTCCACAGGAGG  
AGCCAATCTCCGACAATGACTCTGAGCAGTACCCTGAAGATGACATCCCAGAGGATGAAGAGGAGGAGGACGAAGAGG  
ATGAAGATGAAGAACCAGATGATGGAGATTATAAGACCCCTCTCCGACGCCAACTCAGGAAAAGAAAGACGACGATGA  
GGGACTATGCCGCCCTATGACCAAGAAACGACAGAGCTCATTGATGCTGCACAGAAAAGCCAGGGATGAGTTTTGACAC  
GGCTGAGAGAGCTCTCCGGAAAGTGGATGATCAGATCAGGAACCTTGAGAAGGAAATTTCTTTGACTTTGGACCCAA  
TGCTGAGTTTTGCTCATCTCTACAGCCAATGTTATGAGTTAACTACTAGCGAGTACATCTACAGGCTGTGTCCGTTCAA  
CAGAGTATCCCAGAAACCAAGTACGGTGGATCTGAAACTAATCTAGGAACATGGGAAAATGGGCAGGTCTGAGGA  
TAACATCTATTCGGTGTGAAAGTATGAACATGGAACAGGATGCTGGCAAGGCCGAACAGGTCCACCATGGTTAAGTT  
AACATGTGGAAGGAGACGGTTGTGACATTAACCTCAGAGCCAGTCCGCTGCGAGTACCTGATGGAGTTTACCAGCCC  
TGCTGTCTGCCAGGACCCCTCCAGCCTGGATCTTTGCTTACAGCAGCAAGAGCTCTAGGTCCTGATTTGTTG  
TTCTGAGGGTACCACACAGTCACTGCAGCAACACGACGTTGCCATGCTGTGAGCAGCACCAACTTGTGTGCGGATAA  
CAATCGAGAATAGATGATGAAATTTCAACAGGTTATGTCGCTACACTTTAAACTTCCACTGCTACCTGTTGTGTTG  
ACTTTCTGATTAATCTCAAATGTAGTGTCAAT

>Sequ11296EST3

CCCTTCTGCTACCGGCTTTTTGGAAGATGGCGGTGCAATCTCCAAGAAGAGGAAGTTCGTCTCAGACGGTATCTT

CAAGGCCGAGCTGAACGAGTTCCTGACTCGCGAGCTTGCCGAGGATGGCTACTCCGGTGTGGAGGTGCGTGTGACTCC  
AACCAGGACTGAGATCATCATCTCTGGCTACAAGGACCCAGAATGTTCTGGGAGAGAAGGGTTCGTCGGATCAGAGAGCT  
GACCCGTGTGGTCCAGAAGAGGTTTGGTTTCCCCGAGGGCAGCGTGGAGCTGTATGCTGAGAAAGTTGCCACTCGTGG  
TCTGTGTGCTCCGATCGTACGAGAGTCTCTGCGCTACAAGCTTGGGAGGCCGCTGGCTGTTTGGGAAACGTTGCCCGCTACTTCGGGA  
TGTTCTGAGGTTTCATCATGGAGAGCGGTGCCAAGGGCTGCGAGGTTGTTGTGTCTGGCAAGCTGAGGGGTGAGAGGGC  
TAAGTCCATGAAGTTTGTGGACGGCCTGATGATCCACAGCGGAGACCCCGTCAACTATTACGTCGACACAGCTGTCCG  
CCACGTCTGTAGGACAGGGTGTGCTGGGCATCAAGGTCAAGATCATGCTGCCCTGGGACCCCGAGTGGTAAGATTGG  
ACCAAGAAGCCCTGCCCGACACGTCAGCATTGTGGAGCCCAAGGAGGAGACCCCTGCCACCACACCCATGTCTGA  
GCAGAAGGGGGCCAAGCCAGAGGTGCCCGTTCATGCCCCAGGGAGCACCTGTCCCCACAGCATAAAAAGGGTTTTTCAACT  
GTTCCACCACATGGAAGCAAGACCCTGTGTTTTTTTTGTGTACAAAAACATAAAAATCTGGAAT

>Sequ11320EST3

ACACGCCTATCGGACAACATAAACCCGTTACCCCTAATACTTCCGGCGCTTGTGGCTGGCGGTTTTGAAATGAGATTG  
CTGCTGTAAAAAACAACACTTTTCGTGCTTAAATGGCAGGTCTATTAAGAGAGAGTATACGCTGCGGAGCAAGGAGA  
GTATTATAGAGCGTAATACGGGTTCAACTTCACTCTCGCTTACTGTACTATGTTCAAAAAGATGACTGAATTTGGTC  
CAGATTCGGGGGGGAGTTAAGGGAGTGACTATTGTGAAGCCTATAGTGTGGGAAACGTTGCCCGCTACTTCGGGA  
AGAAGAGAGAGGAGGATGGACACACACATCAGTGGTCTGTCTATGTGAAGCCTTACAGAAATGAGGATATGTCAGCTT  
ATGTGAAGAAGATCCAGTTCAGTTACATGAGAGTTATGGTAACCCACTGAGAGTGGTGACAAAGCCTCCATATGAGA  
TTACAGAGACGGGCTGGGGCGAGTTGAGATCATCATTAAAGATCTTCTTCATTGACCCCAATGAGAGACCTGTGACTC  
TGTACCATCTATTGAAGCTGTTCAGTCAGACTCCAGTGCCATGCCTAAGAAGACAGTTGTCTCTGAATTTCTATGATG  
AAATGATCTTTTCCAGTCTTACAGCCATGATGCAGCAGCTACTGACCACATCAAGACAACACTACCCTTGGTGCATACA  
AGCATGAGACAGAGTTCAGTGAGTTGGAGCAAAGGACCAAGGAGAAAAATGGAAGCGGCAAGAAGAGAACCAGCCAGG  
AGATCGCAGAGCTGAAAAGACAATTTAAAAGCCAGCAGAGAAAACATCAACCACCTGAAGTCAGAGATCAGGAAACTGGA  
GGAGGACGGAGACCACAAGGAGCACTGAGAAATGGACAACACAGCACACATGTGAACGTGATCATTTTGGTATGGCTC  
CTGACCCCATCCCTGATTTGAAAAGAAAACAAATGCATTTTTTAGTGATCTACTGTGTGTTCAAAGTAATGGTAAAAACTT  
AATCAATTTCAATTTTATTTGTTGTTGTTTTTTAGTTTTGTTTTTAACTGATCTTGTCAATTTTGTATCTAAAGT

>Sequ11351EST3

GGTATGAGTATGACAAGTGCACTATATGATGCAACGAAGACACTTGAACAAATATTAACATGCAGGTTTTAAAACGACA  
GGAAGCGGTCACAGATAACAGACTTTGAACTACCTCAGCTACAGCCAAGCAAAGAAGCTAACTACCCTACTTGTCTTTT  
AAAAGCACCCGTTACGTTTTCAACCGGTTGAGGAACTTTACGACGCTCCCTAATCACCCTTCCAACACAACCTTTGC  
CCTTCGTTCGCGTAGCTCGCTGCAGTTTTGTAGCATGCAGTGGGTAATAACAGGAGGACTGTGCACACTACGACAGAGC  
CTCATATCAGAGCGTGTAAACACATTTGCCAAGGTTGGTGACTCGTCGGAACATGTGCTCAAGCGAAACCGCCG  
GTTTTCTTACTGGAACTATGGCGTTCCGTTGGCCGAGTTGACGCCGAGCAGAGCCTGGAGATGGTGCAAGCTTTCTG  
AGCAGGGGACACAAGCAGCTGGACACAGCCCTCATGTACGTGGATGGGAAGTCAGAGACCGTCATAGGGGGCATGAAT  
CTCCCCAAAACAGTAAGCATTGCTACCAAGGCCAACCCCTGGGATGGGAAGACGCTGAAGCCAGACAGTGTGCGCTCC  
CAGCTGGAAACCTCCCTTCAGAGGCTGCAGACCGATTCTGTGGACTTTTTCTACCTCCATGCCCTGACCACAAAAC  
CCCATCCAGGATACCCTTAGGGCCTGCAATGAACTCCACAAGAGGGGAAAAATTCAGGAGTTTGGCCTGTCAAACAT  
GCATCATGGGAAGTGGCTGAAATTTGCCACCATCTGCAGACACAACAACCTGGATCGCTCCCCTGTTTATCAGGGGATG  
TACAATGCCACTACAAGACAGGTTGAGACAGAGTTGCTGCCATGTTTTGAGATACTACGGAATGAGATTTCTACGCATAC  
AATCCTCTAGCAGGTGGTCTTCTGACAGGGAAAGTATCATTATCAAGACAAAGATGGTTCCAGCCTGCTGGTCCGTTT  
TTTGGTAACAGCTGGGCCACAGCATATCGGGACAGATACTGGAAGGAAAGTCATTTCCAGGCCATAGAGGTGGTTCTG  
AAGGCCTTGGAGACGGTGTACGGCTCAGAAAAACCCACCCTGACTTCTGCTGCTATGCGCTGGATGTACCACCCTCC  
CAACTTAAGGGCGATCTTGGAGATGGAGTTATCATTGGCATGTCCAGCATGGAGCAACTTCAGCAGAAGCTGGCTGCT  
TCAGAGGAAGTCTCTGGATGAGCGAGTGGTTGCAGCCTTCAATGAAGCCTGGAATCTCGTAGCCACGAGTGTCCA  
AACTACTTCAGATGAGGACCCCTCTTTTTTAATGTAGAGCCAAAATCTCCATTACAGTCCAATCAAATATTTCAACTT  
TTTACAGAGATCTGCTAAAAGCCCATTCCTTTTCAAGTTACTTAATAGTTTTTCTGAAATCACACTTAAAAATTTGCATTT  
TTTTGCATCAATTTGAAACCATTTATGTAATATGCAAGAGCATTTTCAAGTGTGATGTATAAATGTAAAAATGACAAGAT  
ATTTCTTCAGGGACAATAACTTTTTTCTGGAGCCCGCCTTAATTAACCTGTACATTTAAAAAGATAACAAAAATTTT  
TGATGTCAACAAAATGTTTTTCTTACACATAAAATGCATCAAATGGGTAGTTGTAACACATGAAACGCTATGTGCTTA  
TTTGTTTTTGGCTGCATGCAAAGTACTTGCATGGAATACAATCTTTTTGTCAATACATTTGACAAATATTGACAAAAGC  
AAGTGGCATCAAGGTGATTACATGTAACAAGATTGTTGAGTCTTGACTCCAGTCACCAGTGTCTCCTGAACAACAATTC  
AGTCCAAAGCTAAATATCAGGGGGGATGACAGATGTTTCATGTTTTGGGGTGAAGCAAGACAGATGAGAGAGATTAAC  
AAAGAGTCCAGGGACAGAACAGGCAGTCCGGATGAATGGTTTCAACAACAATGTCCCTCTGGTGTGAGGTTGGCAAA  
AAGACTTTTTAAAAACAGACGTGTAACAAGCCCTGCCCATGCCGATGTTTTATCTGCATCGTCATCTTCTTCATCAT  
CTTCATTTCTTCGATAGACTCTTCTCCCGAGCAAAGTTGTCAAACCTCACCTGTTTCTGAGTTCACATACATTTGTA  
TTTGCACCTTGAATCTGCCATCTCGATGCCAAAGAGTTTCAAGATACGACCTGCTCAGGAGACAGCATATCTCCCT  
CCTTACAGACCTCATGGTCTTTCAGCAGTGTACCACCTCTTCTTGGAGAGCGGTAGGAAGTCCCAATTTGTTCAACT  
GGGGCTCCATTGAGTGAGGAAACTGTTCCAGGGGTCCCTCATCCAGTGTATATCCATCTGTGCCTGGTTGCCAGCTC  
GCGCATAATCCACCTCTTTGAAATGATTGAAATACTCTTGTACCTCATCTTTGTTTTATTTGTGAATAGTACACCCA  
CTTCTCCTCGTAGATATTTGCAAACCTTGTGCAAATATCTTTGTATTCACTGTTTCTCCTTTACCAAGGCGATCA  
TCATGACCTTATTTTTGCCGAAGAAGAATCTGCTGTGTTTTCCATGCTGTCCCTGATGTCTTTTCAAGCTTGTATTCTCA  
TATTGGCCACAGAGAATATGAACAAGTTTTCTGTAGGTGTCCACACATTTCCGTAACCTCCTCGATTAATTTCTGTTTCA  
ACTCCAGTCCCTTCTTGGCTGTCTTCAATGAAATTTTTCTTGTCCCTTTGACTTCGGCATGGTTTTCTCTCACG  
ATGGCAGCGCAGCAGACGCACA

>Sequ11369EST3

AGGGCGTGGCAATGCGCGGAGTTCGCGGTGGTGTGGTCTGTGGTGGTGGCGGGTGAACATCAGTGAACACTCGGCTC  
ATGTGACTCGGGAGACTCAAACAGGAACAAAATGGCTGCAACTGGAGACGACGCCAGCGGATGGAGAGCATCTCCA  
GGGCGCCAGCGGCTCATACGGCGGCCCCGATCCCGCTCCGAGCTCCAGCAGCCGACAGAAGTCCCGCAGGATGCGG

AGGACAGCCCGGCGGCCGCTCCGAAGAAACCCACACCAACAGTGTGGAGGTGTGGAGACAGCAGAGGAGGCTGTGG  
AGCCTGCAGAGCCTGACATCAACGAGTTGTGCACTGATATGTTTAAAAAGATGGCCGCTTCTCCTGCAAGGAGAACTCA  
CAGCCACCTGCGAGGATTACCGCCTGCTGGAGAACATGAACAAGCTAACCCAGCCTGAAGTACATGGAAAATGAAAGACA  
TCAGCATTAATATCAGGTAACTGCAGGATCTCAACAACAAGTATGCCAGCCTACAGCCTTACTTGGACCAAATAA  
ATCAGATTGAGGAGCAAGTGTCTTCACTTGAACAAGCTGCTTACAAACTGGACGCATACTCCAAGAAGCTGGAGGCCA  
GATTCAAAAAACTGGAGAAGCGATGAGGAGGAAGAAGAGGCAGACTGAGAGTTACGGTGCCTTCTCGCCTTCTTTTAC  
CCTGCCCTTGCCTCAGTCGTTCCCTGCCAGCGGAGCCAGGAGCTGCGGGGCAGGATGTGAAGTACAGACTGAAACAACAA  
ACAGTCCGAGCCACATTTGACACTTAGAATCGACCGAGGAGGAAGCAGCTGAAGGCACATGAATTAGTACTGCAGTGTCT  
TGGCTTAGATTTAACTCCAGTATCACAGTTTTTTGGCGGCAGTCGTGCAGCCAAGTTCACGGTGTACAGCCGCGTTCT  
TTTTGCAGACACACTTTACGTTGAATAAATCTGCCTGATGACCTGCATATCCTAACTGAGGGCTGGAATCAGAGTGTA  
CTAATCTAATACTAAACATTAAGACACACAGCAGCTACTTAAACCAGTGGAGTATATAATGACACTTTGGTCATGTAT  
AGATCATTTTACATGACGAAGCATGCTCATTGTTTTAATAATGACCCAGAGGTTAATAGTAGCCTAAAATCTACATTG  
GGAGATTGAATTTATCTCATTACAGATTTGTTTTCTGGCTGGTGTGAACAGCACCACAGTCTGTTAACGTTATTGA  
GAGTTTCTTATGTTAAAGGTTACTGTGTAGAGCACAGCTGAAAATCACTCTAGCTTTGTACAGTGAGTTTTAAGTTTG  
TAATTTAAAAAGATGAATATTTGACATGGATGAACTATTGTATGATGTGTATTTTGGAGATATTGACACTGAAAACCTGG  
AGGCTT

>Sequ11401EST3

TTTCTAGAGGAGTGGAGCATGGAGAACCTGGAGGAGATCTCACCTGCCGCCATCGCAGATGCCACTAAGATCTTTGTG  
AACGGCTGCTGGGTCCGAATCCACAAAAGATCCCGAACAGCTGATGAACACACTGAGGAAAACCTGCGGCGACAGATGGAC  
ATCATCGTGTCTGAGGTGTGATGATCAGAGACATCAGAGAACGTGAGATCAGGATTTACACAGATGCTGGGCGAATC  
TGTCAGCCGCTGCTGATCGTCCGAGAAACAAAACACTGCTGAAGAGACGCACACATCGACCAGCTGAAGGAGAGAGAGT  
ACAACAACCTACAGCTGGCAGGACTTGGTGGCGAGCGGCGTGGTTGAGTACATCGACACTCTGGAGGAGGAGACGGTGA  
TGCTCGCCATGACCCCTGATGACCTCCAGGAGAAGGGCGTGGCATACTGCTCCACCTACACCCACTGTGAGATTCACC  
CGTCCATGATCCTCGGAGTTTGTGCCTCCATCATCCCCTTCCCTGACCACAACAGTCTCCCAGGAACACATACCAGT  
CTGCCATGGGTAAACAGGCCATGGGCGTCTACATCACCAACTTCCACGTACGAATGGACACACTGGCTCACGTTTTGT  
ACTACCCTCAGAAAACCGCTGGTACCACCCGATCTATGGAGTACCTGCGCTTCAGAGAGCTGCCTGCAGGTATCAATT  
CCATCGTGGCGATTGCCTCGTACACAGGATACAACCAGGAAGACTCTGTGATCATGAACAGGTCCGCTGTGGATCGAG  
GCTTCTCAGGTCTGTTTTCTATCGGTCTACAAAGAGCAAGAGTCAAAGAAAAGTTTTGACCAGGAGGAGATTTTTG  
AGAAGCCGACACGTGAAACCTGTCAGGGTATGAGACACGCCATCTATGACAAGCTGGATGACGATGGCCTGATCGCGC  
CCGGAGTCCGTGTCAGGTGAAGACGTGATCATTGGGAAAACGGTGACGCTGCCAGAGAATGACGACGAGCTTGACA  
GCACCAACCGCCGCTACACAAAAGGGACTGCAGCACCTTCTGAGAACGAGTGAGACCGGCATTGTGGACCAGGTGA  
TGGTAGCCCTGAACCAGGAAGGCTACAAGTTCTGCAAGATCAGGTTGCGTTCAGTCCGGATTCCTCAGATCGGAGACA  
AATTTGCCAGCCGACATGGACAGAAAAGGAACCTGTGGATCCAGTACAGACAGGAGGACATGCCGTTCCACTGTGAGG  
GAATCACACCTGACATCATCAATCCTCACGCCATCCCCTCCAGAATGACAGTCCGTCATTTGATCGAGTGTCTGC  
AGGGGAAGGTGTCTGCAACAAAAGGTGAGATCGGTGACGCGACACCATTTAACGACGCCGTCACAGTACAGAAAAGTAT  
CGAACCTGCTGTGACAGTACGGATACCACCTGAGAGGAAATGAGGTTCTGTATAACGGCTTCACGGGAAGGAAGCTGA  
CCTCTCAGATCTTCATCGGCCAACGATTTATCAGCGTGTAAACACATGGTGGATGACAAGATCCACTCGAGGGGCC  
GGGCCCCGTCAGATACTCAACAGGCAGCCGATGGAGGGACGATCACGTGATGGCGGCTGCGGTTCCGGGGAGATGGA  
GCGTGCATGCTCAGATCTCATGAGCGGCTCAATTTCTCCGAGACGCTTTTTTCGAGGCGCTTCTTATCAAGT  
TCACGTCTGTAACCTGTGTGGACTAATGGCCATCGCCAACACACGGACGCACACGTACGAGTGTGAGGCTGCCGGAA  
CAAGACACAGATCTCTTTGGTCCGGATGCCGATGCTTGTAAACTTCTCTCCAGGAGTTGATGTGATGAGCATCGC  
CCCTCGTATGATGACATCATAGAGTGGCTCGGCCTATCAAACACCTCCCTGCAGAGTTAAGTGTGAGATCATCAGCA  
GGAAGTGAAGTTAAGTTAGTTTACGTTTATGTTTTTACAGTTTTCATGTTGTCGCTCACTTTGTTTTTGTAAAAGTA  
GAATAAATCGGATTTTCTTGGCAAAAAAAGACTAATAATTGATATATCAAAACACTAATGAATAACAATACCAA  
ATATAAACCTACAAAATCCATTCTCTCTGGAATCATTTCATGAGTCC

>Sequ11505SNP3

CTGGGTAGTTTTACGCCCCAGCACAGAGTCCAGGACAGAGGACCAACACCATCATCATCACGTCAAGGCCCCAAGTAAA  
GACGAGTTGAATCGCCTCTCTGACAGCCAGGTGCAGGAGTTGAGCAATCAAGTCCGGGTTTATTGCATCATATGGTA  
CAGCCAAAGATCCTTGTCTTACTGGCTACAGACTATGGACACTGGAGCAAACACTGTGACAAGGCTGTGTTTTACACC  
TCAGAGTCTCTAAAGCGCTCGATGCCATGACATGAAAGAAAAGATGACTGGGCAAGGTACGTAAAGCTCTGAAG  
CATGCTTATGAGAAATGCCGGCGACCTGCGCTGGTCTTTGTGGCACAGCCGACTACTTTTGCATCATTGAGAACCCTC  
AAATACCTGGTGTCTGCAAAGGATCCCAGTGCAGCCCTTCTATCTGGGCAATGCTATGAAGTACAGGGGAGCTTGAGTAT  
GTGGCGTATGATAGTGGCATTGTTCTAAGCTATGAAGCTCTGAAAAGGCTGGTTCACGTGTTTACAGGACGAAGACAAA  
TGTCCAGAGAGAGGACGACCCCTGTGGAAGCTGAGTGTGACAAGCAGCTGGCCGTGTGTCTCAAATATACAGGTGTG  
TTTGCAGAGAACCGGAGAAGATGCACACGGAAAGGGCTGTTCACAGCAAGAGTGTGACAGCCTGATAACAGACAGC  
ATGAAGGACAACCCCAACATGTGGTGGAGGGCTGCTGCTCCGACTTGGCAGTAACATTCAGCGGGATGTCACCAAAT  
CAGATGCAGGTTCATGATGTTTTGGAGTTTACAGACTCCGACCTTACGGGCACGATTTTCATGACTCGTTAACATTTTAC  
CCTCCTGAAGGATCAGACAATGACTAGAGACTTATTCCTTCAAGCTGGATCTTGCATTTTAATATTTTGCCTCTGTG  
ATGGCAAAACTCGGTATTGGGAGATGGTTTTCTTATGCTGTTTGTAAAACCTGATCCTGGGTGGGAACAACACTTTTA  
TGTATATTTGTAACCTTTGCACTTGGCACAATCAGCACCAACTTTCTTTGTTGGTGTAGGTACACAGCTGATGGGAGTG  
CCGCTCTTTGAAATGAAGATGACTGGGAAATACATCAAGCTGTGACATAAGATTACCTGGAAGTTTTGGTTATTG  
TAATATTGTTATGTATCTTAAATGTTTGTCTTTTTGTGCTTAAAGCTGCATTAGTTATTGAGTGATACCTGTTTTGA  
AATCATTTAACGTTTAAACAAATGCTCGGCCCTTTCACATTACGAATGACTTTTTCTTTCTCTGAGAATTGAATC  
AAACATGCTCTAACCCAGTTCTAAATTAAGTGCATTTCTTGTGATGTAATGCTGTTTATCTCTACATATTACGAATT  
GGCCATCACTGCTTAATTAATGAATGAGTAAAGTATATTTCTTCTGTCACACATATAAAAAAAGAAAAGAAAACACTCGG  
TGATATTTTAAAAACACCTGGCTTCAGACTCACCATATGATGCCTTTTTAAAAGAAAAGAAAAGAAAACACTCGG  
TAATAAAAGTAAATAAATGAATCACTGACTGACTATTACAGGGTGGGAATGAGGATGAACGAATGCTAGTAGCTT

>Sequ11639EST2, Sequ11639SNP2

GAAGGCAGCAAAGGAGTTGAGCCAGCGTTCTCCTCCCATTCTCTGGCCAAGGTGGACGCCACTGTGGAGAATGAGAT  
CGCCACACGCTTTGAAGTCACAGGCTATCCCACCCTCAAGATCTTCAGGAAGGGCAAGGCGTTTGTACTACGAGCGGAC  
CCAGAGAGAAGTATGGTATTGTTGACTACATGGGTGAGCAAGCAGGGCCCTCCCTCCAAACAGGTCCAGGCAGCAAAAC  
AGGTGCAGGAGCTTATCAAGGATGGGGATGATGCTGTATAGTCCGGTGTGTTCTCCGGCGAGCAGGATGCAGCCTATG  
AGATCTACATCGAGGCTTGTAAATGTACTGAGGAAGACTTCACCTTCGTCACTCCTTCAGCTCTGAAGTGAAGCAACTG  
CTCAAAGCGTCAACTGGTCAGGTTGTTCATTGTTTCAGCCTGAAAAGTTTTCGCTCCAAGTTTTCAGCCAGCGTCACACACA  
CTTTCAGTCAAGGACTCTACGTCAAGTGTGAGAAAGTACAGGAGTTCTTCAAAAAGCATGTGATTCTCTGGTGGGCCAC  
AGGAAACCAAGCAATGATGCTAAGCGCTACACAAAACGACCCCTGGTGGTTGTGATATATGGAGTAGACTTCAGCTTT  
GACTACAGGAAAAGTACACAGTTCTGGAGGTCCAAGGTGCTGGAGGTGGCCAAAGAGTTCCCAAGAAATACACGTTTGCC  
ATTGCTGATGAGGAAAGACTACGCAGAGGAGCTGAAGAGCCTGGGTCTGAGTGAAGAGCGGAGAAAGTAAATGTGGGA  
ATTCTGGCAGATGGAGGCAAAAAGTTTGGCATGGAGCCCGAGGAGTTTGACGCTGAGGTGCTGCAAGACTTTGTTATG  
GCTTTTAAAGAAAGGAAAGCTCAAACCCATTGTCAAGTCCCAGCCAGTGCCAAAGAACAACAAGGACCAGTTAAAGTT  
GTGGTAGGAAAACTTTTATGATGAGATTGTTCATGGATACCCAGAAGGACGTCCTGATTGAGTTTTATGCTCCCTGGTGT  
GGCCACTGTAAGAAACTGGAGCCTGATTATTTGGCTCTGGGCAAAAAGTACAAAAGGGGAGAAGAACCCTGGTGTATCGCC  
AAGATGGACACCCAGCAAGCAACGACGTGCCAAACGAGAGCTACAAAGTGAAGGCTTTCCACGATATACTTTGCCCA  
AGCAACAGCAAGCAGAGCCAGTCAAATTTGAAGGCGGAGACAGAACAATAGAAGGATTGAGTAAAGTTCATAGAAAA  
CACGCCACAAAACACAGAAGAGAGATGAACTTTGAACTTTCTCTCCTGACCAGTAGCTAAGAACTCTTACCGCTCT  
CAGGCGGCGCTTGGAGGAAGCTGAGAGGGGCTCTGGGAAGGTGAAGGGAACACAGTGGAGTTAAACGGTGTACTG  
AGTTGAATGATGATTATATGTTCAATCATCCTTTTTAGTTTCTGTTCAATTTGAAGAGATTGAGCTTTCTTCTGTTT  
TAAAGCATGTAAGCACTGTTGAAGATTTAAGTCTTTTTAAATAAAAATCAAAAATGACATCAGCTTTGTGTGCCAACA  
CTAC

>Sequ11670SNP3

GTGTCCAATGAGCCAGGAAATCGCTACAACATCCAGCTGATCAATGCTCTAGTGTGTATGTAGGCACACAGGCTATT  
GCTCACATCCACAACAAGGGCAGCAGCCCTCCATGAGCAGCATCACTCACTCTGCACACATGGACATCTTCCAGAAC  
CTGGCTGTGGATCTGGACACTGAAGGACGTTACCTGTTCTGTAATGCAATCGCCAAATCAGCTGCGATACCCCAACAGC  
CACACTCACTACTTCAGCTGCACTATGCTCTATCTGTTTGTCTGAGGCAAAACACAGAGGCCATACAGGACAGATCACC  
AGGGTCTGTTGGAGCGGCTGATAGTGAACAGGCCTCACCCATGGGGTCTCCTTATCACCTTCATCGAGCTGATCAAG  
AATCCTGCCCTCAAGTCTGGAGCCACGACTTTGTGCACTGTGCCCTGAGATTGAAAAGCTGTTCCAGTCAGTAGCC  
CAGTGTGCATGGACAGAAAGCAGGCCAGCAGGTGATGGAAGGACCCGTTGCCAGCTAGCCTGTGCACCAGCCAGCT  
CGTAGCCCTTGGGAGAGATGCCCGGGCCTTGACCCACTCCCCACCACACATGTTGGCACTGGATAAACTGGCAAC  
CACAGTCAATTTGAAATGTGGCTGAAAGGACTACTGCTCAGGATCTAAAGATTGATTTTGTATCCCTTTGGGGCTG  
AATGAGAAGGAGAAATGGGTTGGGACATGCTGTTTAAATATACTTTTTTGTATGCTTTGATGCTTTGATGAAATATTGAAAAAG  
GGAGAACGGGAGAGTAAATAAGTGGAGAACAATTCACATGTCAAATAAAAATGATCCTGACATGTAAGACATCTTAA  
CATATTTTCACTCACTACCAAAGTCTTGGTTTTGCTTCTCTCCACACAGATCCTTTTTTTCAGACCGTTTTTGTGTTT  
ATTTTCAGAGGCTGAATGGTAGATGATTGAAGAAAAAGCTGCCTGCTATTTTCATTTGATTCCCTTTTTATCCCTGAGT  
GGGACAGGAAGATGTAGTTTAGTCTGCCAGGTGGGTTGGGGTCTGCTCCTGGTGTGTTGGTGGAGACAGTTTGTCTGAT  
GGTTTGCCAAACTGGCTCTGGACGCTCTCCCTGGCATTGTAATAATGTGCAAGTGTGTTGACATCGTATCTTG  
ACAATTTGTACAAAAGATCCAAATTTGAAGAACAAACAATAGAAGGACCAATACAGCCCATTTTGTAAATTTTGAATGTT  
TTGTAATGATTTGGTCCATGTGTTGATTTTTGTAGTCTTTCTAGTTTGGCTTTAGTTCTTGTACTTAACTGCAGT  
ATGCATACATACAGGAAATAAAGCATTCAAACGCAATGCATCTGTGTTCTTTTAGGACTACAAAATTAAGATGATGT  
TGCTAATATATCAGGTGTTTCGATTACAAGGTATCTTCTAGTATCTAGAAAACCAACAATTCATAGTAAATACTCAGAT  
TTCCAGAGTCGGGTGCAGGTCATACTTAAATATTTGAATTGAGTGAAGGTTTATATCTTGTGTTTATTGAAAATGTGAAA  
GTTCTGATTGATGATACATCCAGAGGACTGGATTACCTGCCAGTCCATGTTTACAAAACAGAAATGTTAGCTCAAAT  
GCCAAT

>Sequ11980SNP3

CCAAATCTGTCACTTCCACTTTTTTCGGAGCTTCTCAACAAGCTCTACTGCCAGCTGGCAAAAACCACCCCTGTGGAAG  
TGCTGGTGGACAGGAGCTTCTCAGGGTGTCTCCTCAGGGCCACAGCAGTTTATAAGAAGACGGAGCATGTGGCTG  
ATGTGGTTGCGAGATGTTCCACATCACCAGAATAAGATATGCAAGCAGATCGCAGCCATCTGATCAGAGTGAAGGCA  
GCCAGAGGCTCAGTATTTTGAAGATCCACACACAAGAGGCGAGGTGTGACGGTCCCTTTATGACCCCCCAGGTTGG  
GTTTCAGAGATGACAACCATCTGCTGAGCTTCATGTGCAACAGCTCCTGCATGGGCGGCATGAACCGCAGGCCTATCC  
TCACCATCCTGACCTCGAGTCTCCAGAGGGACTGGTGTGGGCCGGAGATGCTTCAGGTTGCGTGTCTGCGCATGTC  
CAGGCAGGGACCGCAAAACAGAGGAGGACAACAGCACCAAGGCGCAGAACGGCACCACAAACCAAAAACGAAAAGA  
GCATCCTGCCCCGACACGACTTCTGTGAAGAAGTCCAAGTCTGCCTCCAGTGCAGAGGAGGAAGACAAGGATGTCT  
ATGTTCTGCGGTTTCAATGTTGAGCTGTTATGAAATGCTAAAGAAAATCAACGATGGTCTGGAGCTGCTTGACAAA  
AAAGCAAAACCAAGTCTAAGGTCTCTGTGAAACATGAGGTCCCTCTGCCCCTCAGCGGAAAGAGACTCCTGCAGAGAG  
GAGAGCGGAGCGACAGTACTGAGAAGCTTGTAGCCGTGATCATGAGGGAACAACGTCATCTCTTAATCCTTCCAAG  
CCATCACGTTTACTTCAGGTTTTTAACCGTATTGGAACCCCAAGTCACCTCCTGCCTCACCTCATCACTTGAGCTGAT  
AACTTAACTGCCTGACCATTTACTGTACTGTACTGTACTGTACAGTGTCTTGTGTTTATGACATATGCAAAATGAATA  
AAGGAGAGCAATTCATATTTGATAGGACGGCTTGGCCTCCTCCTCACTGCTCTCATTTGATAGTGGTCTGTGAAATA  
GCTGTGAGACCTTAACTTTCTGTGATTGCAAGAACAGGATGCTGGGGTGGGACTTAAATTTGGGAAGGACTGGATT  
TAATCAGTGTAAATTTTGGCTGGGATTTTAAATTTGAGTTTCAATGACTCCGTTTTTAAATTTGTTGTCAGTCTTGTCA  
TTTATGATGCATTACATTTAGTCTATTTAGTTAGTAGATGAAAACCAAGAGATTGTTTCTTGGTTTTTTCAGTGACAT  
TTATTTTTTTTATGTTTGTGCAATATTTGATTATTTATCTGAATTGAGCAGTTTTTGTGAGTTGAGTCCCGACTGAGGGAG  
ACGTGTGACTGCAAGGATCATAATTTGAACAAGTCACTGCCATTTATTAGAAAAAGTCAAAAATCACCCCTTGTGAAA  
CTTGAATCGGTGTTTACCTCCAATAATGTTGCTGTATTACTGCACCACAGCCCAACACATTTACTGCAACAGATCC  
CAACACGCAATTAAGTGCAGCACAGCATAACAATTTTACACATTTTTATGTACCTGTATGAGGAAATTCAGTCCATGT  
GTTGCTGTCCAGCTGTGATTAATGTGCTGTGCAAGCTTACAAGACATTTATAGATAA



>Sequ12149SNP3

GTCATTGTATTTTTTTCAGTCTTCTGATGTATTATAAACTGATGATTGACTGAGAAAAATAAAAGATGCCTGCTTCAGTG  
CAGCTTTTTGCCCTGACGCACATCTGTGCAGGTTGTTTTCCAAAGGAATTGAACTGGGAGTCATTGACACGATGTGCAGAT  
CTTTATTCTTTTTCTCCCTTTTTCTTGCTTCCAGACATTATTTCAAACGAGCAGGACTGGTTTCTGCATGGTGTAAAA  
TCTAAAGGGAAATCCATCCTTAAATCTTTCAGTCTGCTGTTGCTTGGAGTTCTCTATGTTGTTGTTTTTCATCTATTTTT  
GTTGCTTGGTGTATTTTTTTTTGTTTTTTTTTCTTACCCCAGAGGAGAACCAGCCAAACTTAGACGGCATGACATCA  
TTGAGTCCAGATATTTCCAGGTCCACATTCTCTCTGGGGTCAATGGTTGGAACGTACAGTAGGAAATCACTCACTCCA  
GCAGAAGTTGATAATGATTAAGGGGAAGGACACTAAAAAGTCAATAACAACACGTCAGCAGAAACAACATGCTCTGAA  
CATCACAGAATAATGATTTAAGGGTGGACTATTCCCTTTAATTTTTTATCCAGACGCTAGATTTTTGATTATGTTTGAC  
ATAAACAGCCTTTTACATTGAGTATTATTACGTTTCTTTTTTTTTTTTTTACCACCATGACAATGACAATGTGGCACCT  
CTGTCCAGACCAGCAGACACCCGTCCTCCGTCAGGGCTCCATGGCTCTGTAACATGCTGGCACTCTGGCCACCCGGC  
ACTATAGGTCTGTATAGCCTTGTATTTACTACTGACTCCTCAACTCTGTACAGAAGAGGAGAATATGATCGCATGGA  
ACCTTGTACTGTAAATAAACCCTATACAGTATATAATATTTAATTTTTGATAACTTTAATCAATTAATCTACTTAC  
CAACAACAGACAGACTTGCAGAAAACCATTTTTTTATGTTTCTTTTTGAGCAGATGTTTTTTTTGTAGAATAGAAA  
GTTGTTTTCTTCTTCCGTTTGGTTTTTACAGTTACTGGGTTTTTTTTGTGCTTTTACTGTAGGGAAAAGAATAT  
GACGTTATCACTTTAAAGATAGACAAGAGTCAATGCTTACGCTAATTAATGATGATGACCCTGATCATGCCAGTGATA  
GTTATCCAGTGTGAGAAATGTTCAAGAATTTGTGAATGAACTGTGCTGGTTTACTGAGCGATTAGCAGTGTGAAT  
CCTGGCTTATGAAGTTTATGACTGTATATTGAAGGGCTTGGTGGAGATGCAGGCTCTAGAGACCCGTCAGAGTCCAG  
CGCGTTCTCAAAGTCACTGCCACCATAAAAAACCAACCTCCCTTCTTACAGTGAAGGAGTGTATCGGTTTTCATATCA  
ATAACATTTGACCAGTGGTTTCTTTATTCATTGTCTGTATAGACAAGTGAACAGTCTCTAGAGCCTGAGTTCACCT  
CTGAGAAATTAAGGATTCTCTGTATTGCCTTGTAAATATTAATTTGTGGACACAATAATTTATAAATGACAAAAGACGT  
GGAT

>Sequ12305SNP3

TCCCCCTCCAACAGCGCCTGCCCTCCCCTGGAGTCTGCAGACCCGGGGTGGACTGCACAACCTGGTGGAGTCTTAGCATT  
GACTGCTCTGCTCTTCAAATGGAGGAGGCCAACATCGCCAGCAGAGCCAAAGCACAAGAGTTTCATCCAAGCAACCAG  
CCAGATTTCTTCAAGCCAATCAGAGCCAGTCTCAGCAGCAGCCTCCCCCTGCTCTGCTTCCCTCCTCCTCCTC  
ACAGATCCCTCCCCCTCCTTCTATCCCTCCGCTCCTTGTCTGAGCCAGCCAGTTTATCCTCCACAGCTCCCTCCC  
ATTGGTTGGATGCACAAAACCCACCCTCTCACCTGCACCCTTCCATGAGTGGCGGTTGTGCACAGACCCCAACCC  
CATCATGCCAGTGGGACTGTCTGGAGTACTGGGAGTTCTGGTGCACCTGGATGGGACAGTGAGAACAAGACCCCTGA  
CAAGTACCTGAAGAAGCTGCACACCCAGGAGCGAGCAGTGGAGGAGGTGAAGCTTGCCATCAAACCTTACTATCAACG  
CAAAGACATCAACAAGGATGAATACAAAGACATCCTCAGGAAGCTGTGCACAAGATCTGCCACAGCCGCATGGAGA  
GATCAACCCGGTCAAAGTCAAGAACCTTGTGAAGCTCTACGTCAGCGCTACAAATACTTCCGAAACATGGACGTAA  
AATGGATGAGGAGGAGAGGGATGACAGGGAGCCAGGAGTGTCCACTCCTCTGCCTGAGAGGAGACCCTCCGCCTTG  
TGCTCAGACCTGGGCCACCCTCTGATTGTTTGTCTGATATTTTTATTGCTTTCATAGCCACCTGTCTGTTTTTATGTG  
ATCTCCCTTCTCTCTGTGATCTCACTGTAAATATGTTTCATTTAGAAAATGTATCACTTATACCATGTTGAAGAGGTG  
GATGCTGTCTGCTCACCTGTGTGATCTGATACAGTCCAGTACTCCAACCTGCAACACATACCACCTGTGTGAAGCG  
TTTAGTTTTGTGACTGTCTCATTAGAAGCTTACAGCGGTGGTACTGATCAGAGGATGTTTCTCGGCAGCAGTGGAT  
TAGCTTCCATGCTGGTTTTGCTCCCCATCCCCATGTATATGCAAGTCCAGCTGAGGAGGAGTAATACCCAGTT  
GAACACATTAATAATATTTGTACAACCCCTGAAGGACACTACCCCCGTCTGTCTCAGACAGTATGGAACAAGCTGT  
CATGGTCCAGACACACTGACCTCTCAGCTCTGTCAATCTGCCGCTCTGTGTTGAGTGCATGTGTTACTGAGGTTGAG  
AAAGTTGCTAAATCTTTTATAAAATGACTTGACCAACAAAATATAAATGTTGCTTGAAAACCAAGTT

>Sequ12349SNP3

GAAGAAAAAGAGCGTCAATCGCTTCCGCAACAACCGTTAGTGCAACAACATGGATGTTACAGCTGAAATTAGTCAGGA  
GGATGGATTTGCTGGTGAAAGCGGTGCCGCCAAGATAAAAAGAGCGACTTGAGAAAACGGAATCAGGCCAGAATAGAGGA  
TGCCGAGCGCGTAAAGAAGAGAAAGAGAGCCAGTCTGTCCGCGAGGAGAAGGACGAGTTTTTCTCCAAGACTTTTCAG  
CAGGGAGCGGGTGTGATCAGAGGAGCTGCTGTCCAGCTGCTCCGGAGCTGACCGAGCCGTTGGTACTCAGAGGCTGGA  
GGAGGCGACGGTCAAACCGTGCAGCTCCAAAAGTTTTCTGAATGACAGCGTGTGTTTCTGACGCGAGTACGAGCTGAG  
ACAATCCCAGGCGACTCTCCAGAAACTCCAGACATCCCTTGGCGAGCCAGAGAGACGGCTCTGCCCAAGAAGAAGTT  
TGCCTTCCAGCTCGCTTAAAGCTGCCAGTGCAGATAAAGTCTCTGCACAGTGTGACACACAGCTCAAGCTGATGTTGCCAC  
ATCTGCACCTGCATCTGGTGAAGTGGATGGAGATGCAGCGTCAGAGCAGTGTGGCTTCTCCAACATGGACAATGAGTT  
TCTGACCAAAACATCTGAGGAGATCCAGAAAAGAGACATGCTCTTGACTCACCTGTCCAACCTGCAAGGTCCGCTGCT  
CGGTTCCCCCAGCACATTGCACCTGAAGCACATCGACAGCTGTGAGATCCTCTGCGGGCCGGTGTCTAGTTCTGTATT  
TGTTGATCATTGCAGAAAACGACTACGCTTCCCCTGTGACAGCTGCGGACCCACAACACCAAAAGA CACACAGGT  
GTACTGCAATGTCACCAGCCGAGCCATCATAGAGGACTGTCTGGAGTGAATTCGCCCCGTTTTCTGGTCTTATCC  
CACTCTGGAAGAGGACTTTAGTGTGTCTGGCCTAGACCAGGACCGGAACAACTGGAATCAGGTGGATGATTTCAACTG  
GCTCGCTGCAGGAACACCTTCCCCAACTGGACTGTATCCAGAACAGACAGGAAAACCAACTGGGATCCTTAACT  
TTAAAGCCTTTATTTGTCAAATTAACACCTGTCAAACCAATGACATGTTGACAGCCTGAATACACATACGTAGTCTT  
GTCCATAATCTTGAATTTAAGGTGGTTTTAATGAATTTTTCTTTGAAGTGGCTGCTTTTTTTTTATTGATAAACTATAA  
CAACAATAATGTAACATACATAGCCACACACAAAATACACACACTCAAAAAGGCAGAGAACAACGAATAAATGC  
ATCATATTTCTATCTCAGCGCTACAAAAATGACATTTTTGATCCTTAACCGTGTCTGAAGCATGTGTCTAAACACAA  
GTTTTAATTGAAAATACTCTGAACCTGGTTGTATGCTGTACTTGTCCATATGGCTACAAAAAAGGGCACTTTGTA  
TCATAAGGTTTTAAGTACATTAATAAATTTAAATAAAAAATCCACCTGTCTTATCAGCCTGAATAACTGTGGGGCTTTA  
GTACTTAGGAGCATCACATCTCCCCTGAGGCAGAGCATCCACACTCTTGCCGAAATTAACCTCAAGCTTTTTATTCTT  
CTGCTCATGATTACACTAGTTCACACAGAGAAAGCTGCTCTCCAACATTAGATTTTTATTCCCATTATTCTGTGATATT  
CAAAAATTTCAAATCAGCCATATTGGAATAGTTAACTAGTGTGAATTTACAGGCTTCTGTTGAGGCAAGTTGATAT  
TACTTTATTCAGAGATATATGTATAATGTATTGTGTTAGAAACCAATTTATAAACTGT

>Sequ12494SNP3

TGTCCTCAACAACTGTGATGAAGGGCAGCCATCTTGTGCCATTTTGCAGTACATGTATAATTATTAGAATATGCATTT  
TAGCTTATCTGTTCTCCAACAATACGATACAATACACTTGGAAAGTAATTTTCATATATAAAAATGAACTGTCTGAGAA  
GACGTGTGTTTTCATGTGCGGCAGGTTGTATTTTCTTTTTGTAACGTGTATTTGATGCAGGGTAGTAACAATGTGTCA  
AATCTTGTCTTTG

>Sequ12653SNP3

TAGCAGGTTTTATTGGCTGGATAACGTCGTTTTCTGTAAAAAATAAACTACGGTACCCATCATGCCTCTCGGGTGCCT  
GATGACGCCACAGAACATCAACAACTCACATGTGGCGTACGTGAGCCGTTGCTGTGCCGTGCTAGCAACAACTGGGTA  
ATGTGGAGCTGACGTCCCAGCTGAAATACCACGTTAAAAATAAATATCACACAGCTACCTACACGCGTTTTGTACACAG  
CTTAACCTGAGCCAACATGCCTCCGAAGAAACCCGCCAGCCTGCGGGAAATAAAAACTCAAGAGAAGAAAAAGGAA  
AAGATAATTGAGGACAAGACATTTGGCCTCAAGAACAAGAAAGGGGCCAAACAGCAGAAGTTCATCAAGAACGTTACT  
CAGCAAGTGAAATATGGACAACAAAGTGCAAGACAGGCTGAGGCAGACAAGACTGCTAAGAAAACCTGACAAGAAGAAA  
GAGTTGGACGAACTCAACGAGCTGTTCAAACCTGTAGTTGCTGCCAGAAAGTCAGCAAAGGTGTCGACCCAAAGTCC  
GTGCTGTGTGCATTTTAAAGCAGGGCCAGTGCACCAAGGTGACAAGTGCAAGTTCAGCCATGATTTGTCAATGGAG  
AGGAAATGTGAGAAGAGAGTGTCTACGTGGATGAAAGAGACGAAGACCTGGAGAAAAGACACAATGGAGAAGTGGAG  
GAGAAGAAGCTGGAGGAGGTGGTCAATAAAAAACACGGAGAAGCTGAGAAGAAAAAGCCAAAAACAAAATTTGTGTGCA  
AGTACTTCTTGGAGGCCATAGAGAATAATAAGTACGGCTGGTCTGGGTGTGTCCAGGGGGGGGCGATACTTGCATGT  
ACCGGCACGCTCTGCCGCCCGGCTTCGTACTCAAGAAAGACAAGAAGAAGGAGGAGAAAATTTTCGTTGG  
AGGAAGTGATAGAAAACGAGCGTGCAGCTCTGGGTGTCAACGTGACTCGGATCACCCCTGGAGACTTTTCTGGCTTGG  
AGAAGAGGAAAAGGCAGGAGAAGGTGGACAAGCGAGGGAGGAGCTGGAGAAGAAGAAGGCCGACTTCAAGGCTGGAA  
AGTCGCTAGTAGTGAGCGGCCGCGAGGTGTTTCGAGTTCCGTCCAGAGCTGGTTCGACGACGACGACGCTGAAGCCGAC  
ACACTCGATACGAGAGCGAAGAAGAGGAAGACGACGAAGTGAATTGATACCACAGAGGTCCAGGACATAGACTTATCTC  
GTTTTGTTCCACAAGAGGTGACACAACACAGGCATTACCGTAGCATCCGTGGACCGTTTTACCTCGAGGAATAAGAACC  
GTGAGAACAGTGAACCGACAGAAGAAGACAACGAGGAACAGCTGAACGGAGCTTGCAGCGCGCTGAGGCCAATGGGC  
TTTCAGGAGCAGAGGGGGGAGGGGAGGACGGAGGAGGGGAGGATGAAGAGGATGAGGAGGAGGTGGAGGAAGAAGAGG  
TTCCGGTGGACGAGAACCCTGTTACGGGTGAAGATCTGGAGGAACGACGAGGAGCTCAACACACTGACGCTGGAAG  
AATGAGGGGGCGCGGAGGTGGAGGTTAGGACGGAAGTAAAGTACAAAGGATGGACCGATGGATGCATGGAGCTTA  
ACAACAAAGAGACCCGGATGTTTGAATGATTTTAAATTTTTCAGAGACTCCAGTAATAAAGCCTGATTATATCATTACATC  
ACTGCCGTGTCTCTGCCCTCTGTTTTCTGTATCGCCCTCTCACATCCCAGACGTTCTGTCCATCGGGTGTCCAAAT  
TTCCACAGCAGGGCCAATAAGGGTCAACCAGGGCCAACCTCCACATGAATGTCGCTTGTCAACAATTCCTAATACGAGAG  
AATTCGGCTGCTGCTGTTGTGCACTTTTTGTTGCTCAACGCTGGCTTACGTTGAAACTGAAATTTACTTTAGATAAAAA  
AATTAGGCTTCGAGTGTCTCTACCTGATCATTAAATATCGAACAGGGTGATTTGCTGAGTGAGACATTACAAG  
GGCGTAAAAATCAAAGCACTGCTGGAAACGGCTTCAGTAACTTAAATAACATTTATCGATGGATGTTTTAAAAAAGCTT  
TTGTAACCTGAATTTATACAAAAGTGGGAAATGAACAGGAGTGAATCTGTGGTAAGAAATCTGTTTCAGAGCTTCGCCTG  
CTCTCGTACCAAAAATAAAGCTGTAGTTTGGAGTTGTGAGCACTTTTCAATATTCAGTAATTTGTTTTCCCTCAACAG  
ATCCATTATTTCAATTAAGTGAACCTAAAACCTGTTGAAAAAATTTGTGTAACCTGTGCGAAGGAAAAGTCCAGACCTA  
GCTTCTGAAATGTCAGGGGTGTTTGGAGACCTGATTAGTGCTGTAATTCAGCCCCAGCAGGGAAAACCAATGATCCCAT  
TGCCAGCCCAGTATTGTAATAATGTTCTCATGAGTTGCCTCCT

>Sequ13256SNP3

ATTGAGGGAATCACTCAAAATCTAAAGAAATACTGTACACATAAACGTTTTTCAGATCGGTAATGGGGATTGAACACA  
TGCTTGTGTGAGAAATTCATTGGTTGCAGGGAGAGTAATATCACTGTAATAATCTTTGAAATTTCTAAAATA TAATTGG  
GAACCTGGGACCCCTGGTGAACACTGTAGACTGTAATAGGATATAATTCATATTCACGACGGAAATCAGACTATATTA  
AGACTTTACCACACTTACACAATGGAACATACATTACGTTTTAATCAAATTTGGAACAGCTTAACAGACACAGTATCA  
TGTGACAGAAATTTGGCTTGAGAAGAGCAGAGCTTTTTTTGCCATCAGTATAAAACAAAGGACTATAAACCTTGAAT  
GTAATGCTTTTTTCGTAAGATGTCTGTGTATAAATTTGCAGTTACCTAGCAGGGTGTGAATAGTGCTAGTGTAGTGCGG  
ATGGATAGACAGAAATTCACATCAAAAACGAACCTCTGTGGAACCCCTTACCTCTGATTTTTATGTTTATGGATATTATC  
ATATTGACAGTGGCTTTTTCAATAGTTGTTTCGATCTTTCCCTCCCTGCATAATGTTTGAATTTGACCAGCTTCAGTCCG  
TGATCACAATTTATGAAGATTTCCGAAATGGTATTTTTCTATGTGTGATTTGAAATCAGAGTTGGTGTCTTTCAGTCT  
AAATAAAGTATGTGAACCTTTGAAATGTGACTTGCATCAGAAGATTTGTGTAACCTTTCTACGCCTCCGCCGGCAGAC  
CCAGGGCTTGAGGCATTATGTTTTTCAGGTCATCCATCCATCCCTCCATTTCTCGTGAACAAGATATCTCAGTAATCT  
AATCTATCTCAAGGAATTTCTACAAAATTTGGCATAAACATTCACTTGGACTCAAGGATAAACTGATTTGATTTTGTG  
ATAAAGGTGAGGCTATACTTGAATTTGCTTGGCCTTCAGATGAAAAAATGACCCAGTTAGCACATGTAAGGATCTG  
CACTGTCTACTGCAAAAACCTGACCTGACGTCACACTGGCT

>Sequ13415EST2

CACACTCGTACAGGATTTTCAAGAATATTTGGTTACCCTGTCCGAATCATTGGCAACAACGGAGTCTTGTTTTTCAGA  
ATCTGCAAAAAAGGGGCGCATTTTCATCGAGTTATGTTGCCAGCGAAACATTCCTACTATTTTTCTACAAAACATAACA  
GGCTTCATGGTGGCAGAGAATATGAAGCAGGAGGAATTGCCAAAGATGGAGCCAAGATGGTAACCTGCAGTGCCTGT  
GCCAATGTACCAAGATTAAGTATCATTGGAGGCTCGTACGGCGCAGGAACTACGGCATGTGTGGCAGAGCCTAC  
AGCCCACGATTCCTGTACATGTGGCCAAAATTTCCCGTATCTCAGTGATGGGTGGTGAGCAGGAGCCACTGTCTGGCC  
ACCCTCACTAAGGATCAGAGGGCGCGAGAAGGAAGGAGTTACAGCAGAGCAAGAGGCTGCCATGAAGGAACCAATA  
GTGCGCGGTTTTGAAGAGGAAGGCAGCCATACTATTCTAGTGCAGACTGTGGGATGACGGGATATTGATCTGCT  
GATACTCGTCTGGTTTTGGGACTGAGTATCAGTGCAGCACTGAATGCACCAACAAAAGAAGACACGGTTTTGGAGTGTTC  
AGGATGTAATGTTTCACTCGGCCTGTACAGGTGTAGACCTCAGACTTTCCAGAGATGACTGTAGTTATTCTAGGTTTT  
GTAGTTTTATTTCTGATATTATTAAGAATAACAAAACAGAGAAAAAACAACCTACGAAAAATAAAATCACAGGAGTGGAA  
TCACACAATCTTCATATTAAGTATTGTGAGACCTTTCCACTGTCACGTTTTGTCCTTAACTGTTACTACACCAGTGT  
AAATGCAACTGTAGTTAAAAAAGCTGTTTCTTTTTGGTGGTTTTTTTTTTTTTTT

>Sequ13465SNP3

GCTAAAGAGGAAACACTTTTCATAACATGGCGTTGGGACAAAGCACATATTGTACTTAATTAATGGATGAGTGACATCA  
ACATTGTTTTATCTACAGGAAGCGCCGAGGGGAGACAAACTGTAGTACGACCTGGTTTCAGTGGTAGTTTGTACATT  
CACAAAATGTAATTTGTCAATGAGGCTCTGCTCTGGCTTAACAGAGCAATGGGAGCCATTGTTGGATCAGTGTGGCAG  
ATGCAGCAGCGCAGCCCTCCACTGGGTGTACGACCTCCAGAAGCTGCAGGTGATTCTGGCTCAGGATCCAAACCCCG  
AGTTCGGCTCTGAGTCCGCCAACCCGTTCTACAGGAGGCAGACGGGCCAGCAGAGCTGCTATGGAGACCAGGCGTATG  
TTCTGCTGGAGTCCCTGTCTGAATGTGGAGGTCTAAATGTTGAGGATCTGAAGCAGCGCACGGTGAATTTCTTCGGTC  
CTGGATCAGAGTATGACACGCCTATCAACGATCCTTACAGAGAGAGAGGAGGGCCAAAGACCCGAGCTGCCCATCGAGG  
GACCATGGAGACATGCGAGTTTAAAGGGCTTCCCTGAAGAATGTGGACGCAGGCAAGAGGAGACAGGATGTGAGAACG  
ACTGTCAGATCGATGGAATAACCAAACCTGGCTCCTGTAGTGGCTTTTTATGCAGGAAAGCCTGACATGCTGGAGAAGG  
TTGAGCAGGCCACACGTGTCAACCAGAACAACGACGCATGTGTGGCAGAGACTCTGGCAGCAGCAAGGTTCTGGAGC  
ATTTTCATCCTGAACGGTCTGACCCTAAAGCCTTGGACGCAGTGTCTGATCAGTCTAGTGACAACAACAGAAAGCAGC  
CGCAGGACCTGGACAAGCAGTCCCGGGCAGCTTTTACCAGGTGAAGGAGAACTCTCCAGGACTCCTCGGGAGCTAA  
TCCCCACTGAGTTTCCAAAACACTGAGGTTTGGCAGGTGCGTTCCAAGCAGCGCTGCATGGAGTCTGACAGCAAAGC  
AGTATGAGCAGGCTGTGAGAGATACCATGAGCTGCGGGGGATGCACCTGCAGTGCAGGATCCTTCAATTGGGGCATGTC  
TTGGGGCACAGACTGGACTGGAGGAAATTCATCTTCTGGACGCCAAAACCTGCGATACGACTCAGTGTGGCAC  
ATGCCAAGAAGATAACCAAACACCACCAATAGTTTCTG

>Sequ13476SNP3

ACAACCAGCTATTCTTAAAGGAGCCACGCCACTCGTGTAACATTATCTTTCGTCAAAGAGACATAGTGCCAAATCGCCG  
GCACGCATGAACAATACATATGACATAACTTAATTTTCAGGCTGGATCATGTGTTTCAGGGGAGGGGAGTTTACACCCCTG  
CACAAAATGTAATTTGTCAATGAGGCTCTGCTCTGGCTTAACAGAGCAATGGGAGCCATTGTTGGATCAGTGTGGCAG  
CCCTCTCTTTTTCTTTCTCTTTTTCTTTCTTTGCTCCCACATAGAGTAACGAGTGACGACTGAGAAAAGACGAGACACCA  
ACAAACACTCAGCACTCCACCGGGTGAAGACAGGACGGTCTGACGGTGGTTAAGATCGTAGCGTCTTCACTATCAACC  
GTCCACTCACAAAGACTTTTCTAGTCATACAGACCAGTACAGTACATTACCTATTCCCTCACACACACGTCATCA  
CACCCACACACTGATGGAACAGCCCCGAGGACACTTCAACACGTGGACCCGAGGAGCCGGGGATCGAACCACCGACCTT  
GTGATTAGCAATACAACAACCAAGAAAATAATCTTTAAGTGGTGAACAAATTTGAAGTGTGAGAGTGTAAACAC  
CAACGATGACTTTATAAAGACTCATGACATATAAAACTATCTGCTTTAACTTTTTCATTTTTTCAGCAGCTGCAGTTCAA  
ACCTCCACTGACATTAATCTGAGCTGCAGACGTGTGTTGTGATTTTACACACTTTTTTCCAGGACTCTCAGCCTCTC  
TAACAAAGAGGCCCTGTGTTAAAGGCCAAATGAAACATCGTATGAAACCTCATTCATTTTCTGCACAGAATTGACAT  
TAAGTCTGGATGTGTTGGGCGAGGCTGGGCGACGCCTCTGAAGTGTGTCCTGTTTCGTCCACAGAGACACGTCATTGAAC  
TACAACGCAGTCCAGGACAATGTCCAGAGGTTTACTGGACGGATCAGTTCCTGTCTGTGGACTGAGACTCCACACAGG  
CCTCTGATGTTCCGAATGTGAGCATCAGAAAACCTCATGATCTTGTTGTTTTTCATGTGAGAGTGTGGTTTTCTGGA  
GCACCCGCTGGTGGACGATAGAGGAACCTGCAGCAGTGGAGGCTGGTCTGATCGCTTTGAATATCTGACATTTGTG  
TAAATCTTTATGTTTCAGCAGCTCATCAAGAACTGAGAGCTGAAGCTAACGGAGGAAAATACTGAGAATAACCACCTGA  
ACAGGTGAACAGGAACCACCCCGCAT

>Sequ13632SNP3

GCCACTGATGTTGCTGCGCTGAAGCTGACACGATAAAGGTGAAATCCCAAGATTCTCTGAAGATCTTGTGTCAGTCAACTC  
CCACATGGCAGTGAACCTCTCAACTGAAGATTAACCACCTTCAGCTCCAAAGCATTGCCCACTTAGATGCCGCTCGG  
TCTTACCTTTTTCAAATGGCTTGCTGTCTGAAGGACGAGCTCCTCTGTTCCATCTGCCTCAGCATCTACCAGGACCCG  
GTCAGCTTTGGCTGCGAGCATTACTTCTGCAGAAAGTGCATTACCGAGCACTGGAGCAGACAGGAGCCTCACGGAACA  
CGAGACTGCCAGAGTGCCGGAGGACCTTACCAGATCCTCTCCTCTCCCCGAGTCTCAAGTTGTCCAACATTGTGGAG  
CGTACTCCGCTTCCCCTGGACGCCATCCTTAACGCTCAGAGGAGCTCCTATCCCTGCAAGGACCACGAGAAGGT  
AAGCTTTCTGCTCACTGATAAAAGTCTGGTGTGCTTCTTCTGCGACGAGCCAGCACTACACGAGCAGCAACCAAGT  
ACCCTATTGACGAGCTTACGAGGAGATACAGAGGAGATGAAGGAGCAGCTGGCCACTCTGCAGCAGTGTGCAAG  
GGACACACTGAGGCCCTGCAGCTCCTGCAGAGACAACCTACTGAGACCAAGTCTCAGGCAAAAAGTCTGCGCGCAACC  
ATCGGAGATGCATTCGAGCGCCTTACCCTTTCTGCGCGAGCGTCAAGAGCATGCTGGAAGAGTTAGAGATGGAT  
ACGGCCCGCAAGTTCGCCGACATCGAGCACAAGATCCAGCGCTACAGTCAAGCAGCTGCGCGACGTCAGGAGGGC  
CAGATCCTGCAGGAGCGCTTAATGAGACGGGACGACACGACTTCTTGGAGGGAGTAGCCGTACAGTCTGAGAGGAT  
AAAGGGAAGATACATGAGACCAATCTGACGTACGAAAGACTTCCCAACATCCAAGTACATGGGACCTTACAGTACAG  
ATATGGAAGTCTGCTTCCAGGATATTTCCAGAGTCCAGCAGCGTTGACCTCGACCCCATCAGCCACCAAAAGA  
CTGATCCTTTTCAGACGACTGTACCATCGTGGCCTACGGGAATCTCCATCCGACGCCCTGCAGGACTCCCGCGCCG  
TTTGATGTGGAGGTGCTGTTCTGGGCGCAGAGGGCTTCGCCTCAGGTGTCCATTAAGTGGGAAGTGTGTTGCGGAG  
AAGACCCAGTGGATGATCGGTGTGGCCACGAGACAGTCAAGTGGAGGAGCAGTCCAGATCCAGCCAGTCCGCGG  
TTCTACTGCATCGTATGCACGACGGGAACCAAGTGCCTGCACCCGAGCCCTGGACCCGTCTCAACGTCAAGAGC  
AAGCTGGAGAAGTGGGGTGTATCTGGACTACCCGAAAGGCTTCTCATCTTCAACGCGGATGACATGCTCCTGG  
CTCTACACCTACCGAGAGAAAATCCCCGCCAAGGTCTTCCCCTATTTTCAGCCCCGGCCAGAGCCATGCTAACGGCAAG  
AACGTGCAGCCATTGCGAATCAACACTGTACGCCTTAAAGAGCTACACACATCTGTGGTTTTGATTGTCTGACAGAT  
GAATCCATCGTAGGTGAAATCTCAGGACTTAAAGAAAAATAATTAATAAATCTGTTTAAAAAAAACGTGTTTTAATA  
GGGTGTTTTGAAATGTTTATTCCTTCAAGTTCGGTGTAAAGAATTTGTGCTTGTGCTCTAAAAACCTGTGCTTGA  
AGATGACACTAAATGGAGACAGCGGGACCCCTGGGCTCCCCGGGGTCTGTGGCAGCGTGTGTTTTGAAAAAGAAAAAGC  
GATACCTCGCTCAAAGTGACTCCAGGCCACCTTGCACACTCCAGGGGACACCACTCCCATTTAATTAAGCTCCAGG  
CTTGTGACAGCTGAGTCCCTCTCTGTCACAGGCAAGCAGGACACTGAAGACTGGTCAAGTCTGCTGCTGTGTA  
CAGTTGGCTTAGCTGTGTTTGTGGAACGTGATTGACAGCAGTCTGCTCTTTATTTTGAAGTGTGCGAGTCCGTTGGCA  
CTTTTTACTCTGTCTGAGACCATGAACTTGGTTCTCCTGTAAGACGTATCCACATCTGTCTGCTCAGTCTTCTTCAT  
AACAAGGAAAGTCTTAGTCCATGTGCACCAATGATTCTGCAGTTACCTAAGACAAAATAAATCAATGAAAAAGTAG  
TTCATAGGCTGCCATCCCCATCCACTGCCAGTCTTACCATGCGTGATAGGAAGCTCTGTTTGGAGGTGGAGATTG  
TCAAGAAATATGCTGCTATTGACGGAGTAAGGACTTTTCATATTTGATTTAGCATATTAAGGTTAAAAGGTTTTGAT  
CTTTCATCATCTGGCTCATGTTTTGCCTCTTTGGTTTTGCTAGCCTTTCAGCATACACTACACATGTGGGCTTTTTG

TCCACTTTAAGTGGATTGGATTGGATTCAAGCACATTTCTGCTTCCTGTCATGATGTTTTATCATTGTTGCTTTGGAAT  
CAAAGAATATGAAGTCATGCTGTCTAACTAGATATCCGCATGAGGCAGAGACCTCTGGTTGTTCTCAGATATGAAAA  
TCTGAAAAGTTAAAGATGAAAATTTGCTTTAAAAGAAAAAGGCTACAGAGACCAACTGTACTCCATTTATTTAAATCG  
TATCTTTTATGTAATGAAATGAAATGAAATGAAATGAAATGAAATGAAATGAAATGAAATGAAATGAAATGAAATGAAAT  
GACTTGAGCACAACTTATGTGATCCTGGCATCGCTTTGGCTGCTGCTGTTACATAATGATGAAATCACTGATAATT  
CCTCTGAGGCTCAAGTCATCTTTTATTCTTTGCCCCACGTGCCCTCAAGTGCTCTTGTATTATCATTAGTTGCACACAAG  
TCCTGCAGAATCTGCTCCAAGAGGCTCTTGTCCCTCCGCCAAGTCCGGCACACTGAGAGATGTGTGTGCTTTGTTT  
AGCATGTTACGGGTATGTTTGTAGTGGCGTGCTTCAAGTGTAAATTTAAATCCAGCTTTGGATGTGCTTGATAAAGCC  
CATCTGGCCCTCAAAGCAAAACCATGCAGTGGCCAAAAGTGTATTATGAAATCTTTAGAAATCAGAGAGAAGTTGA  
CAGATCTTTCTTTGGGAAATCTAAAAAAGGACAAAACAAAAGGATCACCTCACCTTCCTTTGCCACTGTACATCTTC  
ATCCGTGCATTAGTGTATGTGTAGTCTGTGTTGTCCATTTAGAAGAAAATTTGGGCGAGTGCCCTTGTTTTTGTAGGAT  
GTGATTCGGGTATGTGCAGTATGATGCAAACTAGGGTCAAATTTGTGAGCATCTCCAACTAGTCTTGGTTGTTTGT  
TAACTTGCACAGATCTGCAGTGTATGATTAACCAGGCACAGCTCATTGTCTGTCAGTTTTCTGGGATTTACTCAT  
TAAATTTATCCAGATAACTTGATGAGCTTGTCTGCTGAAAAAGATTTTATTATTAATGTGTGGTTTTCGAGTCCCGCAT  
CGGACAAGCCTTTACCTGTATGTCAATCCCTTCTCTGTCATCCCATTTCTGTCTCTCTACTGCATATCAAT  
AAAGGCACAAAAGCCTGAAAAATTAATTTAAAAAGTTAATTAATGTGTGGTTTTAGAGAATCAGGACTGTATTCAGTT  
ATTTTTCACTTTTATCCTCTTGATCTGTCTATCACTATATAAAATGTCTTCCAAAAGTAAATCCCAACCTGCTGGGCT  
CATGCAGGTTAAAACAAATGTTAAAATTTGACCCAGTTTGTGTGTTGCAGACCTCAGTGCAGTCCGCTCATTAAG  
ACTTTCTGTTTGAATAGTAAGAAGGAGATTATCGTGAGGTGGTGTGGGTTACTGGTGATGCTGATGATGCTAATGGT  
TAAAATGATTTGATGATGATGATGATGATGATGATAATATAACTATGACACTTTTAAATGATTATGTCTTTT  
GATGATGGCCGCTGTGCACCCATCACTGTATGAACACACTCTAGTGTGCTTTTGTGCTGGAGGTTTGTGGGAAATGT  
TTAATGTACAATAAATTAAGTCCG

>Sequ13768SNP3

AAGTAGGAAGTTTCTGTTAATTCAGTTTTTCATCGCACAGGCAGCGACGCGGACCACAAAATGGACACAGAGACGC  
CCACCAAGCTGGAGTTTGCAGTGCAGATGACATGCGAGAGCTGTGCAGAGAAAGTCAGTGTCTGCTGGAGGGGAAAC  
CAGGAGTGAAGTCTGTCAGCATTTGATCTCAGTAGGGAAGAGGTGTTGGTGGAAATCGGCTCTGACCAAGTCCGAAGTGC  
AGGCTCTGATAGAAAAGCCTGAAACCGGACGACGAGGGCGGTGCTGAAAGGCATCGGAGGATCGGTGCAAGATCTGGGTGCAGCG  
TGGCCATGCTGGATGGTGTGCGAAAAGATCCAAGGGGTGGTGCCTTTCTGCAGTTATCGGAGGAGCGCTGCTTGATAG  
ATGGGGCCGTCGATGGGTGGAGCCTGGACTCCACGGCTCCACATTCACACCTGGGGGACCTCACGCAGGACTGCA  
GCAGTTGTGGAGAGCACTATAACCGTTTGAAGACAGCAGGTTGGACCAGGGGACTCTGAAAGGCATGTAGGTGATC  
TGGGAAATATTTGCCGGACAGATGGCAGAGCCTCATTTAGACTAGAAGACAGTCAAGTAAAGGTATGGGATGTGA  
TTGGCCGATCGCTGGTGGTGGATGCAGGGGAGGACGACTTGGCCGAGGCAGTCAACCTCTCTCCAAACAGACCGGGGA  
ACTCGTGGGAAAAGCTGGCATGTGGATCATCGCCGATCTGCGGGCTTTTCCAAAATCCCAACAGATCTGGGTGCAGCGT  
GTGACGGGGTGCAGCTGTGGGAGGAGAGACAGGCCGATAGCTGGGAAAAGCCGAAAACAAGACCAACGCAGCGACAC  
CGGCAGCGCACCTGTGAACCTCGGGCACAAACACTGAGCCATCTCCAAGAGAAATGCAGAGGATGTTTGTGACAGAG  
GGTCCGGCAGGCGACGAGCACTGAGGAATGTGTTTACAGACAGCTGGAGGGAGAACCAAGAAAAATGAATTCCTGAT  
TTCCTTGAATTTTCTGTGATAAAATCAAACGCTCTCAGTTCGAGTTAGTGTCTCTGAGGGTTTTAAATGCACAT  
AAAGCAGATTAACAGACAGCACTTTGTAAAAGTCCCCCTGATTAGCTGTATATATATTTGTATAACTAGTCTGC  
CTCGGACACAATCGTCTCATCACCATCAAATTTGATGTACATGTGAGATCTTAGGTATCATTTTACTGTGTGCTGG  
TAGGGATAAATCCCTTCAATTTGCTATAAAAAAAGGGTCTAAGCCTCTAAAAACAGTGGTAAGTAATAAAAAA  
AATATAACACTGCTCTCACATCAGCTCACTCTCCACCCAGGAACAATCATAACCAGGGAAACATTTGTGGAGTGGCT  
CAGCTGATTTAGAAAAAAGCGGTTAGTGACTTGAATTTAAATCTATCCACAGCTTTTCAAGTTAGGAGAGAATATA  
ACAAATGTGTGATGCTGAAATCTGTGATCTTACACTTTTGGTCAAGTTGTAGCTATAAGTGTGTGACTGAAAAGACAT  
ACAGGTTAGCTAGTTAACAGAGAAAAGTTGAAAAGAAATAGTTATAACAGACAAAATGATTGAAACATCTGCGACTGTCA  
GAAGGATGAATACAAGCTTGACCAAACCTCAGATGTGGACTCACACAGCGCGTTATCTTGAATAATAAAGGGGAACAA  
TGAGAGAGCACTTAATAAAAAAAGAGGAAAAA

>Sequ13860SNP3

CTTACGCTGCGCTCGCACGCGGCACGCTGTGGCGCGAAAACCCCTTCAAGTTGTGCGGTGAGACGGCAGCGGGGAACAC  
GGAGCCACAAACTCTGAGCAACATCTGAAGCGTTTTTCAAGAAGAATAAAAAAATCATACAACATGGCAACCGAC  
TCTGTCGACGACGAGAGATGAGGGAGGCTCAGCGGGATTACCTGGACTTCTTGGACGACATCAAGACCAGGGGGTT  
TATCAGAGCAAAGTCCGCGACATGATCAGCGAGAATAAAGCCCGGCTCACCGTCAACATCAACGACCTGAGGAGACGC  
AACGAGGCCCCGGCTGCAAAACTGATGAGCAATGCCTTTGAGGAGCTGCTTGCCTTCCAGCGGGCGTTGAAGGACATG  
GTCGCCCTCTGTGGACGCCACCTACGCCAAGCAGTACGAGGAGTTCTTCGTGCGCTTGGAGGGCAGCTTCGGCTCCAAG  
CAGCTCACCCCTCGTACCCTGACCTCCCGACTGCTGGGAGCATGGTCTGCGTGGAGGGCATCATACCAAGTGTCT  
CTGGTGCCTCCAAAAGTGGTGGCAGCGTCCACTACTGCCCGCCACCAAGAAGACGATGGAGAGGAAGTACACGGAC  
ATGACCTCCCTGAGCGCTTTCCCTTCCAGTGCCATCTACCCACCAAGGATGAGGAGAACAACCCCTCTGGAGACAGAG  
TTCGGTCTGTCCGTCTACAAGGACCACCAGACCATCACGGTGCAGGAGATGCCGGAGAAGGGCGCCCGGGCAGCTC  
CCCCGGTCTGTGGACATCATCCTGGACAACGACCTGGTGGACGTGGTCAAACCGGGAGACAGGGTCCAGGTGCTTGGG  
ACGTACCGCTGTCTGCCCGAAAAGAGGGAGGGTTACCTCCGGCACGTTCAAGACCATCATGATCGCCTGCCACGTC  
AAACAAATGAGCAAGGAGGTGTCCCCCTCTCTGCGGATGATGTGGCCAAAATCAGAACTTCAAGCCGACCCCG  
TCCAAGGATGTGTGAGCAGCTGGCTCGCTCCCTGGCACCAGCATCCACGGACACGAGTACATCAAGAAGGCCATC  
CTCTGCATGCTGTGGCGCGGTGGAGAAGGTGCTGGAGAACGGCTCGCGCATCAGAGGAGACATCAACATCCTGCTC  
ATCGGTGATCCCTCAGTGGCCAAGTCCCAGCTGCTGCGTTATGTGCTACACACGGCGCCAGAGCCATCCCCACCAG  
GGACGAGGCTCCTCTGGTGTGGGTCTGACTGCCGCCGTACCACCTGACCAGGAGACCGGTGAGCGCCGGCTGGAGGCG  
GGCGCCATGGTGTGGCTGACCGCGCGGTGGTGTGCATCGACGAGTTCGACAAGATGTCCGACATGGACCGCACGGCC  
ATCCACGAGGTGATGGAGCAGGGTCTGTACCATCGCCAAGGCTGGGATCCACGCCCGCTCAACGCTCGTGTCTC  
GTGCTGGCAGCCGCAACCCCTGTCTACGGCAGATACGATCAGTATAAAACCCCATGGAGAACATCGGCCTCCAGGAC  
TCCCTGCTGTCGCGTTTCGACCTCCTTTCATCGTGGATGGACCCCGAGCAGGACCGGGAGATCTCCGAC

CACGTGCTGAGGATGCACCGCTACCGTGACCCCCGCGAGCAGGAGGGAACAGCCATGGCTCTGGGCGGGACAGTCGAC  
GTCCTGGCTACTGAGGACCCAGACGCAGTAGCAGAGGAGCAGGAGGAATTGCAGATCTACGAGAAACACAACAACCTG  
CTGCACGGAAGCAAGAGGAAGAAGGATAAGATTGTGAGTAAGGAGTTCATGAGGAAGTACATCCACATCGCCAAGATT  
GTGACACCTGTGCTGACGGAGGAGGCGGCCAATCACATCGCAGAGGAGTACTCGAGGCTGAGGAGCCAGGAGCAGCTG  
GCTGCAGATATCGCCAGGACCTCTCCAGTGACGGCCCCAACTCTGGAGACCATGATCCGTCTGTCCACGGCACACGCC  
AAGGCCCGCATGAGCAAAAACCGTGGAGCTGGAGGACTCGGAGGTGGCCGTGGAGCTCGTCCAGTTTCGCCTACTTCAA  
AAGGTTCTGGAGAAGGAGAAGAAACGTTTCGAGACAGGAGCGGGACTCTGGCTCGGAGGAGGAGGAGGAGGATTTCG  
TCAACTCAGCGTTTACAGAAAACCTCAGAGGAAGAGGGGGCGCCGTGGCTCTCAGGGCAGCGAGCCCTACAGCCCATAT  
GACTTCAGTGAGGAGCAGAACGTCCTCCGAGATTTCAGGCCGGCAGCCGAAACCAGCCAAGCCGAGCGAGAGGAGGAG  
GAGCCCATGGACGCGCCTCACAGGCTGAAGACACTGAGCTCTCTGCAGACAGACTGAAAGAATCCAAGTCGTCCCTG  
TTCGCCGTGTTCCAGTCCGCTCACGCTCAGTCCGTGAAGATGAAGACGCTGATGGACAACGTCACAAGGAGCGCCAG  
AATCAGTTCACGGAGCCAGAGGTTTCGCGCCGCTCTGGCCCGCATGCAGGACGACAACCAGGTCATGGTTCGCTGATGAC  
ATCATCTTCCATCTGAGGAATGACGAGGAGGATGACTGTTTTCTGAAATTTAATAACATGGACTTTGAAAGAAACAG  
ATTTATATCAAACTGTACGTTTTATTTTTCATCTGATATTGGACACTTCTTTTATTTTTTTCACGCTGTTTTTTCGTCTCTCA  
TTTTCTGAAAAGACACCTGACCTCTGATGCGCATGAGGCACCAAGAAAGACTGAAACCGGTTTTATTCCTGTGGTGGG  
TTTTGATCCACATAAGGTGCAGGTTGATCTATTAGCAAGACAGTTTTTATTCATATATGATGCACCTGTTTTCTTTCA  
GGTAATATCACCTTCAAAATGGTTTTTATTACCTCGTCTCAACAGATTAATGTTGTGTGTAATAATGAGCATTTCAGTTCA  
TATAAAGGAGGACAGTGTTCAGCCAGTGCAGGTACAGTCTTCATTTAGCAATGAAACATACTGTGCATTACTGCAT  
CAGAATCAGGACATTTGTGAAGTTAGTGTACCAACACTTCTGTTGTCTGGGTTTTGTATATAGTTGAAGAGGAGTTTTG  
AAATTGTTAATTAACGTAGTTGTGTATAAAAA

>Sequ13900SNP2

AACCGATGTGCAATAACAGTCTGTGACGAGTTTGTGTTGACTAAGCAAGAAGTGGTTCGGTTAGCTAATATCGTTTTAC  
TGCGGCGGCCCTAGCTAACATTAGCTAGCGCTGTGAAGTTGGGACAGTCCTTTTCATTTTCATGAGCTCACTGTGAGGGCC  
TCTTTTTAACCTGCTGTGCTTTCCATGATACTACAGCTCCACCTGGAATTTATTTTCATATCACTGTGGCTATATTGATC  
AAAGCTTATCGTACCTTTAGTGGAAAGCCAGATCCTCGAAAGCCAGAGTGAGTACGGCTTCTTGAGAACAATCAAGG  
GGAAGTGGTTATCCATGTCCACGAGCTACTGCGGATTAATAATCTTTAATAACATCAGCAAACATGTCTTTAGTCGCC  
TATGGCAGCAGTATGATAGTACTCCGAGGAAACCTCCACTTCTGCCGACGCGGAGAGCAAAAGTCAAGCAGGAGGG  
CTCTTCTCTCTCTGCTGCTCCTAAAAAGCCAGGATCTGCAGGTGGAACGATGGACCAAGAAAGGAGACAAAAGCA  
AACCTTTCAGTGGGGACAGCAGTCAAACGATGACCTACATCCTCCAGCATCTAAAGGAGGCTTCTTTCTAGTCTG  
CCTAAGCCGAGGAAGCGAACAGAGCCTGTCAAGATCACTGTGCCAGAGATCCAGAGACACGATTCAGACTCTGATGAT  
GATGAACCG

>Sequ14234SNP3

GGCAGTCCGGTCTCATTCACACCACACGGCCGCTCTCTCTGCAGGAGTTATATCATCCCGTGTGACACCTTGTAG  
CAGCTACAAGCCTTTTACACCACAAAGATGTTTTCGTCTCCCAACAGTCATGAAGCAGGTGAGGCCTGTGTGCCGGGCG  
CTGGCTCCTCACCTGACACGAGCCTACGCTAAAGACGTGAAGTTTTGGAGCCGACGCTCGCGCCCTCATGCTGCAGGGA  
GTCGACCTGCTGGCGGACGCTGTGGCCGTCAACATGGGCCCAAAGGGTCTGACCGTTCATCATTGAGCAGAGCTGGGGC  
AGCCCTAAAGTACCAAGGACGGCGTGACCTGGCCAAAGCAAGGACTGACCTGAAGGACAAGTACAAGAACATCGGCC  
AAGCTGGTGCAGGACGTGGCCAACAACACCAACAGGAGGCGCGCACGCCACCACCAGCCAGGTCGTTGCTCGT  
GCCATCGCCAAGGAGGGCTTCGACACCATCAGCAAAGGCGCCAACCCCGTGGAGATCCGCCGTGGAGTCATGATGGCC  
GTGGAATACGTCATCAGCGAGCTGAAGAAGCTCTCCAAGCCGTCACAACCCCGAGGAGATCGCACAGGTTGCTACA  
ATCTCAGCCAATGGAGACGTGGAGATCGGTAACATCATCTCTAACGCCATGAAGAAAGTTGGCCGCAAGGGAGTCATC  
ACTGTCAAGGACGGGAAGACGCTGCACGACGAGCTGGAGATCATCGAGGGCATGAAGTTTGACCGTGGTTACATCTCC  
CCGTACTTTCATCAACACCCGCAAAAGGTCAGAAGTGTGAGTTCAGGACGCCACCTGCTGCTGAGTGAGAAGAAGATC  
TCCAGTGTCCAGGCATCGTTCCAGCCCTGGAGATCGCCAACCGACCGCAAGCCGCTGGTCATCGTGGCGAGGAC  
GTGGACGGAGAGGCCCTGAGCACCTTGGTTCTCAACAGGCTGAAGGTGGGGCTTCAGGTGGTTCGCTGTCAAGGCCCCG  
GGCTTCGGAGACAACAGGAAGAACCAGCTGAAGGATATGGCCATCGCCACCGGGGGCACCGTGTGGAGACGAGGCT  
GTGGGCGTGGCCCTGGAAGACATCCAGGCTCACGACTTCGGTAAGGTTCGGCAGGTTGCAGATCACCAGGACGACACC  
CTGCTGCTGAGGGGAGGCGGCAGCCAGCCGAGGTGGACAACCGCGCAGCGGAGATCGTGGAGCAGCTGGAGAACACC  
ACCAGGACTACGAGAAGGAGAAGCTCAACGAGAGGCTCGCCAAGCTGTCGGACGGCGTGGCCGTGCTCAAGATCGGA  
GGAACGAGTGACGTGGAGGTGAACGAGAAGAAGGACCGTGTGACGGACGCTCTGAACGCCACCCGGCAGCTGTGGAG  
GAGGGGATCGTTCCAGGTGGAGGCTGCGCTCTGCTGCGCTGCATCCCATCGCTCGACAGCCTCAAAAACCGCCAACGCC  
GACCAGAAGATCGGTGTGGACATCATCAGGCGAGCGCTGCGTATCCCCTCGATGACCATCGCTAAGAACGCCGGTGTG  
GAGGGCTCACTGGTGGTGGAGAAGATCCTGCAGGAGTCAGCTGATATCGGCTACGACGCCATGCAGGGGGAGTACGTC  
AACATGGTGGAGAAGGGCATCATTGACCCACCAAGGTGGTGGAGGACGGCGCTGCTGGAGCCCGCAGGAGTGCCTCC  
CTGCTTCCACCGCCGAGGCGCTGCTCACGGAGATCCCCAAGGAGGAGAAGGAGATGCCGGGAGGTGGCATGGGCGGC  
ATGGGAGGCATGGGCGGCATGGGAGGAGGATGGGTTTTCTAAGCCGTTCTCTGACTTGTGTGCTGTACAGACTAAAA  
GGCAGAGCGGTGCTGGGGTGGCTGTGGAGCACACGCAGAAGAAGAAAAAACAACAACAACCCCTCCAAGAATC  
TGCAACCACCTCCAGGAGCTCTGCCCACACTGACTGGCCATGAGTATGTTGGAGATGCCACGCTGTTTTAATTTCTGT  
CTCCTGCCCTCCGAGGACCCGGTCCGGAGCAGGAGACCCCATCGAGCCAGTTACTTACTACACCAGAACCCTCCGAC  
GGCTCTGCTCATCGAACCAATCCACATGTTCAAACCTCATAGTTCTTTCATGTAACCGCTCGTACAGGTGATGCCACTG  
TGATCTGTAAAGAGGTAGGAAAGTAATTCAGTCTGCTAAGAAGAAACTTCAGAACTAACATAGTTCATGCTGTTATTG  
ATGCTCTGTATTACTGCAAAAAGAGAGCAGGACAGTACGAGAGAAGCAAGCCTAGCCAGGAATGTGTCTGTCTTTATT  
TTTGTCTTGTAGTATTTTGTAAATTCGTTTTGTTTTTTTTATATATATATATATCTGTTATGGTTTTTTTTCCCCCA  
GCTGATAACGACGTGGGTTAAATCTCTCATTTGATTTTAATTAACAGTTTTCTTTCAGAGCCTGAGCATTGTCTG  
TGTCCTGAAGTGACGTTACATTTTTGTTTTGTCTGGTGTGATGAGGAAAGATCACCTGTTCCCTCGTACCTG

>Sequ14380SNP3

ATCACAGTGGCTAAGATAGGCAGTTGCTCCTGATGGCATGGAACAAGGGAGAAAATCAAGGTCAAAATTTCTACAC

GTGACTAAGTAACTATTGGATATCGAAGTTACATAATCACAAGTGAACAAAAGATGCCATGGAGCAGCTAGAAGAGGA  
ACTTACCTGCCAATCTGCTGCGGTCTCTTCGAGGACCCACGGGTCTTGTGTGCTCACACAGCTTTTTGCAAGAAATG  
CTTGGAGGGACTCTTGGAAAGGAAACCGAGGTCACGCTTTTCAGAACACCTTTCAAATGCCCCACATGCCGCAAAGAGAC  
CCCTCACAAACGGCGAAACAGCCTGCAGATCAACTACTCTTCGCGGGAATAGTGGAGAAGTACAGCAAAAATAAGGGT  
TCTGCCTAAGATGCTGCTTGTAAACAACACTGCGACCAGCCTCTTAACATATTTTTGCGCCACGGACTTGAAACTAAT  
TTGTGGGTTTTTGCGCAACTACAGATGACCACAAAGGGCATAAATTTCTGCTCCTTGGAGGAGGCATATGACCATGAGAA  
GGAGGCGTTTTGAAGAGCTGCTTCACGGGGTGGAGAGCTGGCAGAGCGCAGATATCCTGTCTGCCTGGAGACACTACA  
AACCAGTAAGAAAAAGGCTCTTCAGTCCGTGACCAAGGACGCAGAAAAAGTAAACAGACTATTTTTGACAAGCTGATCAG  
TGCACCTGAATGCAAAAAGAATGAGATCCTCTCCGATTTTTGAAACACTGAAGCTGGTGGTGTGCAAGCATATGACCC  
GGAGATACCAAGCTGAGCGCAGCACTGGAAGAGCAGAGACTGGCGCTCAGCATCGCGGAGTCTTT CAGGAGCGTCTC  
CGACCCCTTGTGCTTTCTGCGCAGATGCAGGAGTTTTCGGGAGAGATTACAGGTCTTAAGGAGACTCCCCTGCCCTC  
CCGAAAGAGATGGACGTCGGCCCCCTTGTGCGCAATTTTCGATGTAAAAAAGTGGGATTAAGGCTCAGAGACGT  
GGACAAGATCTCAGTCCCCCATGAGAATGGCTCGTACAGAGTGGGGGGCTCAGGATGGCAGCGCTCGGTGGATCAC  
CTTATTTATGAGTTTGTGCTGTCAACTCTGCTCCTGCTGCAGCCGCACAACCTTACAGCCTACGTAACCTCTCAGAT  
TGAACATTTCTTACTACAGTTTTCTCGCACCTCAGCCACACTGCTGTGTACCTGCAGGAAATGACTGACATGTGCAC  
AAGTTTAAATGAGCGCAGGCCAGGAATGTGTGTCGTCAGTCACTTAATTGACTCTACTGTCAGTTTTATTGGCAGTTGTAAGTT  
GTTTTAATTACTAGCCTGTGGCATCTCACGCACTCACAGCTACAAATGTTTTCCCAAGTGACCCGTGTGATGCACAAA  
AGTAGTGACAAATATGCACCTGAGCATATGTAAACATTTGTTTTATCTAATTTGTTTATTATGTCTTTTGTCTTTTTTTT  
GCTCAACCTCTCTGAAGCCACAGAATCGATCATTCAATTCAGAGATTCAAGCCTTCAATTTACATAGGACAGACACTAAA  
TCACACCTCTTTCCACAAAATGTGCGATCTATTCTTAATACGATGACACTTTTATACTTCTCCAAGATGATCTTGATAA  
ATAAACTGAGAAATGTAAGACACATCCATGTTTTGA

>Sequ14504SNP3

GGAGCCTCTTAAAGAAGAAGTACAGAAAGCTGGAGGAAAGGGTGCCAAAGGCAGGTGGAGGAGGAGGAGATGACGATGA  
GCTGGCACCCCTCCAGATTGGACATCAGAGTGGGCAAGGTCATCAGTGTGGAGAAGCATCCAGACGCTGATTAAGTGT  
CCTGGAGAAGATCGACGTGGGCGAGGCGGAGCCAGGACGGTAGTCAGCGGGCTGGTGGCCTATGTTTTACAGGAGGA  
CCTGCAGGACAGAAATGGTGTGTTGTTGTTGTCGAATCTCAAACCCAGAAGATGCGAGGGATCGAGTCGCAAGCCATGCT  
GCTGTGCGCCTCTGTTGAAGGGGAGCCAGGAGGGTGGAGCCTCTAGACCCCTCAGAGGGTTCGTCCACAGGGGAACG  
GGTCTTTGTGGAAGGATATGAGACAGGCAAAGCAGACGACAGACTCAACCCAAAGAAGAAGGTGTGGGAGAACTACA  
GGTCGACCTGAAGGTCTCAGACGAGTGTGTAGCTCAGTGGAAAGACAAGCAGCTGATGACCAAACTGGGACAGATCAC  
ATGTAAAACACTGAAAGGAGGCAACATCAGTTAAATACACTCAAGCTACATTCACCCTGAAGCTGCTGCTGCCACC  
ACCTCAAAACAACAATACGCTCATACCAAATTTGCCATGGCGACAACGGTCAATCTTCATCTGGATGTTTTCTCAGAA  
AAGGACATCGATGCCAAAAGTCTCAGATGCTTTTCAGACTGGCTTTGACAAAATCTGTTACCTTGTCTTTGACTTCATTA  
GGAAAGATGTATGTAATTTCTCTAAACATAAAGCAACTTCAAAGAAAAATATGAAACTAATCAACCTTTGATTTCAATC  
GTTTTATCTTTTTGTTTACTGGGCATTGATGGTTTTTACTAATGCACCTTAAATGTACACATACAACAAATGTTCTGCAAA  
TCGGAGATAGCGGGCCTGATCAGATAAAGAAGGACTGATTGCTTGAATGTTGACGTACCAGTCGCTCATTCTGGTA  
GTAGCTGATAAGGATTTCTCAGGTGTTTTAAAAAGGGACTTAATGTATCAGTACTTTTCTGGGTAAAATTCGACTTGTG  
TTGTTTTGCCTTCATGGTAAATGTGATGCCAACCTGCCAACCTAATTAATAAGAATGGTTTTTATGGGGTTTTTCAGTCA  
TCAGATGTGTGAAAAGATGATTTGCCTTGTGCTATAGGACGGTTGCATTTGGGGGTT

>Sequ14769SNP2

TACAGGTGTTGGTCAGAAAAACGCTAAAGCAAGTTTTAGATAATGCGTGATTGCGTGCAGAGCCAACGGGAAGATGCA  
CGACTGTCCAAGGCTTTACAGCTCTACTTTCATGAACGTAGAGAGAGAGACTGAAGGAAACTGATGTTCTGATATTTAA  
AACTGACAACAACACTCAAGCAAACAACCTTCCACAGCAACTTTGCTTCGTATGTTGCGAGCTAGCTCAAGTTACAAC  
GAGGCTGTACAGTTGGCAGATTCGGCTGTTTTGTTTCTGTCTGACAACCCGTATCATGATTTATCACAGTGA  
TCAGTTCAATTCAGAGGAATCACACAGCTGTTGAACCTACGCAAGAGATACAGATACCAGTGTGTTCTCTTGA  
ATTAACCGTGGTTTTCTTATTGTTCCCGGGGTTAGCAACCAAGCCGGTTAGCTTTTTGAACGCTAGCAAGCAAGCTATTT  
TGTTTGGAGCCTGTTACCAGATAGCTAAACTAGCCGCAACAAAAGATAGCTACGGCGGACTCCACGGCTAGCCGCT  
ACATCGCTAAGCTCCAGTAGCACCTTTTTTTCGCAAGGACTATGCGGTGTAGCCAGGCGCTAACACCATTGTACACT  
TCGTCTCTTTTTCTCTTTTTGACTTCCAGTCCATCGATTGATTTGATTTCTTTATATCAAAAATGTAATATATAATATCA  
GTGTAAGAGAATCAGAAGAAGATGTTAGCATACGTGTACTAAAGACCTCAGAGTTGGTATCGATGGCTGAGACGAGC  
TTCACAGAAACACTGGGAGTGTGATCGGACAGATTTCTATCGACGTTTTCTCCCGCCTCTGTGCCATTACACTGGAAT  
ACTTATGAATTTGACTGTCTTAGATTAACCTATCATTACGTGTGACGTATAATTTGTTATAAATAAACGTTAAAGAAG

>Sequ14956EST2

TCAGGAGGTGACACTTCTGGGGTTGGGGGCGAGGTGGTTCGTACAGCGGGTCTGACTGGCGTTTTGGGGGGTGGACCTC  
GTCGCGGCTCCTGAGTCGACGGCTGTGATCTGAGAACCCTAGGGACGCTTGTATAGTGGGCGAGGAATCCATCCGAT  
GTCACACTGAGGTGAGACACGAACCTGGACCAGCAGCACATTGCCACTGGTAATAATGGGTTGCGGGGCTGATCGCCA  
CAGTATTTTCCAATCAGCCGTGAATCATCTTTCTCTCCACCGTTAAAGAACGCCACGTAGTCAAAAAGCGACAGTAGGT  
GTCAGACTCCAAGAGGAACCTTATCAAACCTTACCCTGGATTACCATTTTCCAGCTCCACCGTGATAAGCCAGGAGCAGC  
TGGTTCCCTGGTGGTATTTCTTGTGAGCCAGTTGGGCGTCATGATCTCTCCCTGGGCTTTGGTTATCTTCCCCCGC  
AGAACCTGCTGGTCAATCCACATATGGTTTTGGCTCCACTGAAATAGGCCACAAAATCCTCTGCCCTGCGTCTCTGCA  
ACCCATCTCAACATCATGTTGTTGTTGTTGTTGTTGTTGTTGTTGTTGTTGTTGTTGTTGTTGTTGTTGTTGTTGTT  
TTTTGCAACCAAGTTGAAATGGCCATTGTAACATCCAGATAGTCTGAGGCGGCGGAAAGTTCCACAAAATCGACCCAGTT  
TGCGGAAGGAGAGCATGACCACGTTTTCCCTCAGGGACAGTGATACGCCAGGTGCATTTGCTGTTAGGTTTTGTAGAAGC  
TTGGGAACCCTTNACTGCCAACAAACCCTGAGTCCGCCACCAGGTGCGCTCCGAGTAAAACACAGGCCTGGTGTAAAT  
TCGTCTGCTGAGCCTTCGTCCATCTTAAACTCAGAGACAGGATCAAGGACAGACCCAGATGCAGCCACACACACCA  
TGATGCCGCGTGCACAC

>Sequ15243SNP3

TCTTCCCCCGAGTCCCCTCCTCGGAAGTAGACGCATCTGTCTATATTCCGTTCTTTTATTTAATACATTTTTTACA  
GCAACCCCTTTTCCCCAGCACATAGCACCATGGAAGCCAAGATGGACGACTAAATTAACAACCGGGTACCCGATTTTCA  
CCCCATAATTAATGCTGAATTTAGTGGACCGGATGAAATCCAACCTGTGGTTTTCTCCGCTTCGCAGGGGAGGTAGCTG  
TATCCAGTGGGGTAGGCTCAACCAGGGGAGGAAAGAATGAAGTTTACTCAACCCTGGGGACGCCAGAGGCTGTCT  
TTTTCTTCTGGAAAAGGCTGCCTCTAGGGAAGCCAAGATGTGGAAGGTCTACGTGCCAAAAGAAGCCCTCCTCACAGGAT  
ACAGACATCTCCCCGGCCAGCGGGACGAGGCCGTGCGCTGGTTGACGGAGCTCCACAGCAGGCTGCAGCTGTACCCA  
GAGACCCCTGGTGTAGCTGTAGCATTCTGGACCGCTTCCCTCGCTCCCATCAAGGCCCGTCCAAAGTACCTGCGCTGC  
ATCGCCATCGCTGCTTCTTCCCTGGCTGCCAAGACATGTGAGGAGGACGAGTGTGTGCCCTCTCTGAGGGAGCTGGCT  
GCCTCCAGCAGCTGTGGCTGTCTCCATCAGAGATCCTGAGGATGGAGAGGATCATCTGGACAAATTTGAAGTGGGAC  
CTGCACACCGCCACAGCACTGGACTTCCCTGCACATTTTCCATGCGATGGTGTGTGTCGTGCTTCTGGGTTTTGGAC  
TCCATGTTGGGATTTGAACCGCTCTCAGCACCTCGCCCTGCTCACACAGCGACTGTACCCTGTCTGGCTGACCACACT  
CTCATAACAGCTCAGAGGATCCATGCTGGCCTTGGCCCTCATCACCCCTGGAACCTGGAGACCTGCTGTCTGACTGGCTG  
GCTCTACTATTGACTGCTGAAGAGGGCACAGATCAACAGTTCGTAGTTGATCAGGAGTCGAGAGCTGGTGGCTCGT  
AGACTGTCCACACTGAGAGCTTCCCTGCCTCCAAACACTGTCTACATCTACCAACCCCTGCAGAGCCAAACCGCTCTG  
CGGCACCCGGCCAGAGGACCCCCACCCCTGCTGCACACTGGGGACCGTCACTCCACCACCGAGTCTTCGAGGA  
ACCACGCCCTCGTCAACACCTCCCCTGCCAGCTACAGACACCTGCTGGAGGGGAGGAGGGGATCCGACGCTTGGG  
GCTCCATCTCCTCCTCACCGACAGCAGCATGCCGACTCTGCTCTCTCCACCCAAAAACCTTACCATCGCAACCGCC  
TGCAGAAGGTCACGCTGCGCTGCAAAGCCTCCGCCAAGCGGAAGGTGGAGGAGATGGAGGTGGACGACTTCTTCGACG  
GCATCAAACGCTGTACAACGAAGACGTCACCACCACCATCACCGTCCAGGAGGGGGCGACACCTGCGACGGGGCGA  
TAACATCAGGTGGAGGAGGAGGAGGAGGTCTGAACACCTGCAGTGTCTTGTCTCGACAGGAAGGCAGTTCTTCCC  
CTGCCCGCTCTGCAGCAGTCACTGCTTCTAGTGTACGGAAGCCGTTTACCAAAACCACTCAACACCGACATCAT  
CTTCTGTTTTCACTCTCAGACTAAAATAAAGTATTTAAACTACGGTCACTTAAATTTAGGCAGCAACCGTGTGCTG  
ACTCCCTCAGCAATAGTCACTGTAGGGGGAGAAAAGAGAGAGATTTTGTAAATTTGCATTAATAAAGCAATACAGAGGC  
AGCTCCTGGGGGACGGTGTCTATCAGAGTTGTCACTGAAAATCGTCTTCCATGTTGCTTCTGCTGATGAAACATTAC  
TGAAGAGTTAAATATTTGTTACAACACAAACAAAGCAGTGAACAGATGATGTCAGAGGTTAAGGTGGTTTTGGTGCA  
AATGACCCAGCGTGACCCGGAGCTGTTTCACTGCCCCGAGGTCAGTTCCCATCATCCCCTGCTGCAGGACAACAGAG  
CCCAAAAAATTTAACTTCAAAAAATAAAACTGCTGCTACTATCTGATTAATGATATTTGTTGAAAATGAATAACAGT  
ATTACAAAAGGTTTAAAAAATAAATAAAGAGAAAAAGTTATCTTAAAAAAACCTAGAATTTAGACTTCTCTCCCCTGT  
CTCGCTCTCAGTCTCTCGTGAAAGATTTTGTGTTGTAACCTATATTTGTTGTTCACTTTTTAAACTCTTCTTTTATT  
TCACATATTTGTGTTTTTATTGCTTCTTCCCTTCCCTTACTCACTCTGCATGGTTTCACTCTATTTATAACTTCCCT  
CTTAAAGAGTCTAAATCATACGTATGAATGTTACTGTATAGACGATTATCTGTCGTAAGTCTGCCCCAGATAGAAAAAGT  
TTAGGTTTTTTTTGTTTTGTTTGTATCGTTTTTGTGTTTTGTTTTTGTGTTTGTGTTTGTGTTTGTGTTTGTGTTT  
ATGTAACATCTTACCTATGAATCACTTTGTGTTGTTTCCCTTCCCTCAGCTTGTGTTGAAAAGCTTGCATGAATGA  
AAGTTTTCTCAGGTTGTTTTATTACAAAGTTCCCTGTCAGATGTCACAGCTGCCAAATGCATTCAGTTTGTATGTAG  
CCCAACTCATCTTGAGATAAATATTAGTTACTACAGCAGCTCTCAGTGGCTGGAGTCGACCACAGTCTACCCATCTG  
GTTCTTGTGCAAGTTTAAAACAAATGCTGTGAAAACTCTGGAGGACCTGCGGTTCTTAAACCTGTTTTAACTAATT  
CAGGTTATAATGATCCTGCTTCTTCTAATTAATCTTTTTTAAACACAGAGACACCAAGAGATCTAGATAAATTTCTATTT  
AAAACCATGAAAGTCGTGGTTATGAGGACGTGTTGCTATGACAACAGCTCCAGTTATATTCAGAAAAATCCAGGCTTT  
ACAGTCAACCTAATGAAAGGGCCCTGGTAAAAAAATAAGATGGCATGTGGTTTCTGTGTTGAAGCAACAAGAGGA  
AAACTTTTCATATGTAATAAAACAACCTTGAGTTATTGAAAGCATTTTAATAGTAAGCTAAGAGACAAACATTAGGTTTT  
TTGAGTTGGTGTCTGAGCTGAGCTGACTCAGAAAAGGAACACGAGTGACAATCTTCACTTTGATGTTAAAAA  
AAAACGCTAAAGCAACATGCTCTGTTTTAATCTCTTGAAGTCTGTTTAAATATATTTTATTCTGCAAAAAGCTCT  
GTTCTTCTGCTGATGAGTGGCTGCCGGTGGCTGCTCCGGGTCCCTGAACACACCGCGCTCCAATAAAGATATAAGAGT  
ATGAAAACGACCATGAGCTCTTTGTCTTCAATTTCTTCTCATTACAGTAGGTTAGGATTCATTGCTCATTAGAAGGA  
AATGAGACGAGGAGCAGATAAGAGAAAAGGAAGGGCAAAAGGATGTGGAGAATCAAACCCACTCATGATATAACG  
TTCACCAGCTAAAGAGCCAGATGTTCTCAGGTACTGGAGAACAGGACCGGTTGCTAACAGGAGAGTCAGTACAGGGATGA

>Sequ15285SNP3

GAAAAAATAATCTGCACTAAGACAGAGCTGAGCTGAAAATCACTGTTTTAACTCAACAACATAAATAACTTTTTCTA  
CTCTTTCTACTTCTGGTCACTGTTTTTATTTGAATAAAAAACAACGTTGGCCCTCAACACGTCAAATTTATGAGTGAAT  
CTCCGAGCTCCCAGTCTCAGTGTAAAGCTAACCACAACACAGGCTGTAGATTCATCTGAGGCTTGTCTTAAATAT  
TTTTCTGAGGATGATGGTTTTAGGGATTTGTGAAATTTTTATATTCTGTGATTTAAAGACATTTCCACTGGTTTTA  
GTTACATTTGTACATTTGTGACTTTTAGGGCAATAGAAGTAAATAATTACATAAAGGATTGATATAAATAAATAA  
ATACAAAAGAATAATGCTATTTTTATAGGTCATTTATCTGAGATTTCCCTGGAAGTTTCTGGAAGTGACTGTAATCA  
GGACAAGTTATAAAGGACTGGGACAGTTGTGAGACATTTAAACAGATTTTATGTGGGTGTGTGGAGCAACTTGTA  
AAGTTGAAGAAAATGTGTTAATCCTGAAACTTACATGGACCTATCACGTACTGGACCTCTGCCTTCTCATGTGACT  
CTGGGAATCACAAGAACAAGGACTTAAAAGGTAAGGTTGGACTGTAACCTCAGTGTGTATCAGTTTAAATAGA  
AACAACAGAGGCCCCAGGATACTTCCCTGAGGGACCCATGTGTTTTATTAAAGACAGGGAACAGGATTCCTCCATCTT  
TACCAGCAGACTTGTCTCTGTATGTCGCTGAACAGAACATTCAGCAGTGAATCTCTTGGGTTTGAAGTAGCCTTTGTG  
TCTCATTATAACTGATTGCACTAATCTGTTGATGCTGAAAATTTATGATCTTCAATTTATTGATTAGTTTTGGTTGAAGT  
TGTGTAGAGACGATGCAGAAGACATGTGTTGTCCTGTTTCTTTTTGTTCTGTGAGATTAATAAGTTTTGATTTTTGC  
TGTGACTACTTTTTGATTTTTCTTTTTGTGTGGAATGATGGCTGGTACTTAAAGCCTTCTGACTTTGGGATCACACATTT  
CATTGTAAATGTTTTCTTTTGTGATCATGATAACTGAGCTGTTGTTACATTTGATTAATTCATTACAATGCATTTGATTT  
ACAGTAGGGGTGAATAACGTCGTAATTGCAGCACTGTGAGAGTTTTATATGTTCAAACCTGTCTAAGACAGAAACACA  
CCATCCAGGTAGCTGTTAGCATCGTTAGCTATCCCCATTGAGAACACAAGTGGAAAGCTAACGGACAAGCATCCAGCTG  
TGTTCCCAAGTGTTTAGGCTTACTAGCAGCTTACTTGCAGATCTTACACATTAGATTTTAGATGCCTGAGTTGTGATT  
TCCACCTCAAACATCTCACATTTATGCTATTTGAATAAATGTGTGAGGATCAAAGAGGTGAAACAATCCAATGTTTCA  
CTAAAAGAGATTCAGTTTTGTGCAGCGGGTTTTAGTTTTTCTTTGATCCATCAGATTTCAACTTGTGACCCACCAAAG  
GGTCTGACCTTTTAAATCAGAAACACTAGCCCTGTTTCGCTGAAAGCTGCTGTAACCTCCTCAGTTTACCACAGTTT  
AGACACTTTGTGAGGGAT

>Sequ15340SNP3

ACAAAGTGTGGTGACCCAGATTGAGTGCCTGCTAATGCGCATGCGCTGATGTGACTGCAATTTCCCTTTCCCTGAATC  
TGGCGAACCTAGTGTCCGGTGGTATTAGTTTTTATTTTACCGACTGTTTTTGTCTATAAAGAGGATTTTCGAGAGTTTT  
TTATGAGTAATCAAAGGCAGCAGAAGCCTACGCTAACAGGCCAGCGTTTTTAAACTCGCAAAAGAGATGAAAAGGAGA  
GGTTCGACCCCTCCAGTTTTCAGGAAAGTATCATACAAGGTCTGAACCAAACGGCACTGATTTGGAAGCTGTTGCAA  
AGTTCCCTTGATGCCCTCTGGTGCCAAACTTACTACCGACGCTATGCTGAGACTCTGTTTCGACATCCTGGTGGCTGGTG  
GAATGCTGGCCCCAGGGGTACCTTGTTCGGACGACGTGACATGCACAGACTTCTGTCTCTTCAAAGCACAAGAGGACA  
TGGAGACCATGCAGGCATATGCACAGGTCTTTAACAAGCTCATCAGGCGTTACAAAATACTGGAGAAAGGATTTGAGG  
AGGAGATTA AAAAGCTGCTGCTGTTTTCTCAAGGGCTTACAGAGTCTGAGCGCAACAAGCTGGCCATGCTAACAGGAA  
TTCTGCTTGCCAAACGGCAATATCTCTGCATCCATTCTTAGCAGCCTCTTCAATGAGAACCTGGTCAAAGAAGGTGTTT  
CTGCATGCTTTGCTGTAAAACCTCTTCAAATCCTGGCTTTCTGAAAAGGACATCAACTCTGTTGCTGCCAGTCTCCGAA  
AGGTTGGCATGGACAACAGGCTCACGGAGCTGTTCCCTGCAAACAAACGCAGTTGTGAGCACTTCTCCAAGTACTTCA  
CAGACGCTGGGCTCAAGGAGCTTTCCGACTTTGCAAGAAACCAGCAGTCCATAGGTGCTCGCAAGGAGCTGCAGAAAG  
AGCTTCAGGAGCAGATGTCGCGTGGGGACCCCTCAGAGATATCATCACCTACCTCCGAGAGGAAATCAAGAAGAACA  
ACATGCCGAGCAGACGATGATTGGATTAATTTGGTCCAGTGAATGAGCTCCGTGGAGTGGAACAAGAAGGAGGAGG  
TGGTACAGAACAGCCATCAAACATTTAAAGCAATACAGCCCCTGTTGAAGGCTTTACCTCCCAGGGCCTCTCTG  
AATTACTCTCTCTGTAAGATCCAGGAGTACTGTTATGACAACATCCATTTTCAATGAAGGCTTCCAGAAAATAGTTG  
TGCTGCTCTACAAAGCGGATGCTTGTAGTGAGGAGGCGATTTGAAATGGTACAATGAAGCCACCTAGCCAAAGGAA  
AGAGCGTTTTCTTGAACAGATGAAAAAGTTTTGTTGAATGGCTCAAGAATGCAGAGGAAAGAGTCCGAATCTGA GGAAG  
AGGAGCAGACTGAGCTCTACTTGTATAACTACCATCTTGAGTTGTATTTTTACATAAACGCAGCACCAGATGCAGT  
AGAGGATTTGTTACTGAAAGTCTGTCTATATTTCTTTTTCTTTATCTCTTCTTACCTCCTCACATCTAGTTCAACT  
GTAATGGAAGGGCTTTAATACTGTTTTTATTTTTCTACATGTTTTGGGCTGAATCAATACTTGTACTCTCCTTTATAC  
TCTCCAGGAGCCGGTACAGTGCCACAGTTAGCTAAATAGATTGAAACCCCTTTCATGTAACAAAGGGAGGGAGGGGT  
GGGGTTTTGGAAAGATAGTCTTTAAAATTAGCCAGTTTGAAGGCATATTTACAGTTATTGTATTTAGTCATGGAAC  
TCTTACTTGCCAGAGGTCTATCTGTGTAGCCATGATATCTTGGTGTCTGAGAGGCAAACCTGTTTTTGTAAATCTCATT  
TTATGCTCTGCCAATATGTGACAACCTCTGAATTTATTGCCAGTTTTTAGATACTGTCTCATTATTGGTGTATGGAG  
CTGTGTTGTTTTCAAAGGTGATGGTGGCAATGCCCCATAAAAATGAATTTAATGCTTACACATCTTAAGTAACAGAAC  
CATGCTAGCTT

>Sequ15646EST2

AGTCTTTGCGGTCTACGAGTCGGGGGGTGTGACTCGACCTTGGAGTTTGACGTGCAGCAGCATGGCGAACAAAGGAGC  
CCAATCGCTTCGTCAGCACCTGAGGGATCTGGCGGGCCGGATGTCTTCGCTGGTGGCAGAGGGGCAGGATTAGGAC  
TGAAGCTGCTGTTGGGAGCTGGTCTTTGGCATATGGTGTAAAGAAGCCACCTACACAGTGGAAGGTGGTACAGAG  
CCATCATCTTCAACAGGATTGGAGGGATGCAGATGGACACTGTTCTGGCTGAGGGGCTGCATTTTCAGGATCCCCTGGT  
TCCAGTATCCCATCATCTATGATATCAGAGCCAAACCCAGGAAGATCTCCTCTCTGACTGGCAGCAAAGATCTGCAGA  
TGGTGAACATAGCGGTGCGAGTGTGTCCAGACCCATGGCGTCCAACCTCCCGGTGCATGTACCAGCGGCTGGGGAAGG  
ACTACGACGAGAGAGTCTCCTCCCTCCATCGTCAACGAGGTCCTGAAGTCTGTGGTGGCGAAGTTTAAACGCCTCGCAGC  
CTACACACAGAGAGCTCAGGTGTCCCTGCTGGTCCGCGAGGAGCTGTTTGGAGAGCCCAAGACTTAAACATCATT  
TGGACGACGTGTTCCATCAGGAGCTGAGCTTACGACGCCAGTACACCGCTGCAGTGGAGGCCAAAGCAACTCGCCAGC  
AAGAGGCCAGAGAGCCAGTTCTATGTGGAGAAAGCCAAACAGGATCAGAGACAGAAGATCATCCAGGCTGAAGGAG  
AGGCTGAAGCTGCCAAAATGTTGGGTCAAGCAGTGACTAAGAACCCAGGTTACCTGAAGCTGAGGCCAATCAGAGCGG  
CACAGACCATCGCTAAGACGGTGGCAACATCTCAGAACAAGGTTTTACCTTAAACGCTGAAAGTTTTGGTCTGAACTTAC  
AAGACCAGGTGCTTTTAAACAATTTGTCTCTGGGTCCAAAGAAGTAATGAAGAGGACGTGGAGAGAAGCAGCAGAAGT  
TTCCCTGCTCGGCTCCGTCTGAACACTCAGTTTACCTGTTGCATTAGAGGATCAACATACATGACTCTAGACACGT  
CTGAATGTGGACAACATCAAAGAACAATTACATTTTTTTATGTTTTTATGTTTTTTTTTGTCTTCTGACATAAATATAAG  
ACTTTAGGGAGTGGCCTGTATTATGCTAAAAGTTTTGTGAATGAATTTATGACAACGTGATCTCATTTCACCTTGACAG  
TGAACAAATCAAAGACGTGTCAAACAGAAAGTACTTCCCTGCACAGGATCAGTGTGTAAGGACTTTTCATGAAGAAGA  
ATTAGTGCAACAATACTTGGAGAATATTTAGGAGATCAGTGTCTTCTGTGAGGAGGAGCTGCCAGGTCTCATGTCCAAA  
ATATCAAACAAGCTATCATGTATTAATGACGTATGTTTCACTGCTGTGTTAATCTCCAGAGTTGGTCTGATCTGG  
CTGCCAGTCTTCTCTGCTACACACATCTCATCTCACAGTTTGGACTGCACTGCACTGAGTGTGTCAGGGGTGTTACAC  
ACGTTAGGAGTGTGTGTGATTTCATGCAGAAAACAGATAACACAGCCAGTGTGGCAGACCAACTTAATACTAATT  
TATCTGTTAATAAACTTTTGTTTTTAAGGACTAAAGAAAAAAAAAAAAACCGAACCTACCCCTAACTA

>Sequ15682EST2

GCTGGCCTGCGTGTCTGACCTTCATAGGAGTAACCATGTTTCGCCAGGACCAGCGGTTGGTGTCTCCCCACAATGTG  
GGCAGGTCAGGAACATGGCTACCTTGAAGGACATCACCATTGCGTTGAAGTCCATCAAGAACATCCAGAAAATCACAA  
AGTCCATGAAAATGGTGGCCGCTGCCAAGTACGCTCGTGCTGAGAGGCAGCTGAAGCCAGCCGTTTATGGCACCG  
GTGCTCTGGCTCTGTACGAGAAGGCTGAAATCAAAGCTCCCGAGGACAAGGCCGCAAGCATTGATCGTTGGTGTGA  
CCTCTGACCGTGGCTCTGTGGTGCCATCCACTCCGGTGTGGCTAAGGCCATTAAGAGCGAGATCGCCAACCTGACTG  
GCGCTGGCAAGGAGGTGATGGTGTCAATGTGGGAGACAAGCTGAGAGGCCCTGCTGCACAGAACTCATGGAAGGACA  
TCATGCTGAACGCAAGGAAATCGGCCGCAAGCCCCAGCTTCGGTGCAGCCTCCATCATCGCCACCGAGCTGCTCA  
ACTCTGGATACGATTCGACAGGCTCCATCATCTTCAACAGATTCAGGCTGTTATCTCATACAAGACGGGACAACA  
AGCCTGTGTTCTCCACAGACATCGTTGCCAACTCAGAGAGCATGGGCGTCTATGATGACATCGCCAGCTGCTGA  
GGAACCTACCAGGAGTTTGTATGGTCAACATCATCTACCTGGCCCTGAGGGAGTCTCCACAGCAGAGCAGAGCGCCA  
GGATGACTGCCATGGACAGCGCCAGCAAGAACGCTTCCGAGATGATTGACAAGCTGACCCCTCACCTTCAACCGTACCA  
GACAGGCCGCTCATACCAAGGAGCTCATTGAGATCATCTCCGGAGCTGCTGCTCTATAAACGGGCCAGGTCATCGTTT  
CCATTGCCATAAGCTCTTCAAAAAAAGTACTTCCGACAAGTGTGTCGAGAGTCTAAAATGAACATTTGTGCTTCTATT  
TGAAAAATATATGGAGAAAATAAACCTCTTACACAGAACCTTATCCTTTCTCAGTCCCTGTATCTCATTCTCACA  
ATAAACCTGACGACTGAGAAAATGAATGTTGATGCTTCTCTTCTGAAGGTGTCGCTACTTTTTAAATCATCAGTT



TGTGTTTTTGAATTTTCTTCTAGAAAGGAATTTAGTCTCAGACGCTTAAGAGTTGTTTCGACGGTGAATTATTCATGTG  
GATTGTAATCTAATTTATTCCTCAGTTGTGTTATTAACAGAGGATGGACAAAATAGCTGAAACACGTTATGTAATCC  
AAACAATAAATAAATAAATAAAT

>Sequ15684EST2

AGCAAGATTCAGCTGGAGGCCAAACTCAAAGAGACATCTGAGAGACTGGAGGATGAAGAGGAAATCAATTCTGAGCTT  
ACCGCTAAGAAGAGGAAAGCTTGAGGATGAATGCTCTGAGCTCAAGAAGGATATGATGACCTGGAGCTTACCTTGGCC  
AAAGTGGAAAAAGAGAAACATGCCACTGAGAACAAGGTGAAGAACCTGACAGAGGAGATGGCTTCTCAGGATGAGAGC  
ATTGCTAAGCTGACCAAGGAGAAGAAAGCCCTTCAGGAGGCTCATCAGCAGACTCTTGATGACCTGCAGGCAGAGGAA  
GACAAAGTCAACACTCTGACCAAGGCCAAGACCAAGCTTGAACAGCAAGTTGATGATCTTGAGGGATCTCTGGAGCAA  
GAGAAGAAGCTGCGTATGGACCTTGAGAGAGCCAAGAGAAAGCTTGAGGGTGATCTGAAACTGGCCAGGAATCTATC  
ATGGATCTTGAGAAATGACAAGCAGCAGTCTGAGGAGAAACTGAAAAAGAAGGACTTTGAAATCAGCCAGCTCCTTAGC  
AAGGTTGAGGATGAGCAGTCAATGGGCGCTCAGCTTCCAGAAGAAGATCAAGGAGCTTCAGGCCCGTATTGAGGAACTG  
GAGGAAGAGATTGAGGCTGAGCGTGCTGCTCGTGCCAAGGTTGAGAAGCAGAGGGCTGACCTCTCCAGGGAACCTGGAG  
GAGATCAGTGAGAGGCTGGAGGAGGCCGGTGGTGCCACTGCTGCTCAGATTGAGATGAACAAGAAGCGTGAGGCTGAG  
TTCCAGAAGCTCCGTCGTGACCTTGAGGAGTCCACTCTGCAGCATGAAGCCACCCTGCTCTTCGCAAGAAGCAG  
GCTGACAGCGTTGCTGAGCTGGGAGAGCAGATCGACAACCTCCAGCGTGTCAAGCAGAAGCTTGAGAAGGAAAAGAGT  
GAATACAAGATGGAGATCGATGACCTCTCCAGCAACATGGAAGCTGTTGCCAAAAGCAAAGGGAAATCTTGAAAAGATG  
AGCCGTACTCTTGAGGACCAACTTAGCGAACTGAAGACCAAGAATGATGAAAATATCCGTCAAAAACAATGACTTGAGT  
GCACAGAAAGCAGCTCTCCTGACAGAGAATGGTGAGTTCCGGCCGCCAAATTAAGAGAAAAGAAGCTCTTGTCTCCCAG  
CTGACCAGAGCAACACAGGCCCTTACACACAGCAGATTGAGGAGCTGAAGAGACAGATTGAAGAGGAAGTTAAGGCCAAG  
AATGCTCTTGCCATGGACTGCAATCCGCGCCACTGACTGCGATCTGCTGAGGGAGCAGTTTGAAGGAGCAGGCCAG  
GCCAAGGCTGAGCTGCAGCGTGGAATGTCCAAGGCCAACAGTGAGGTGGCTCAGTGGAGAACTAAAATATGAAACTGAT  
GCTATCCAGCGCACTGAGGAGCTTGAGGAGGCCAAGAAAAGCTGGCTCAGCGCTTCAGGAGGCTGAGGAGCAGATT  
GAGGCTGTGAATCCAAGTGTGCCTCTCTGGAGAAAACCAAACAGAGGCTCCAGAGTGAGGTGGAGGACCTCATGATT  
GATGTGGAGAGGGCTAATGGGCTGGCTGCTAACCTGGACAAGAAGCAGAGGAACTTTGACAAGGTGTTGGCAGAATGG  
AAGCAAAAGTATGAGGAGGGCTCAGGCAGAGCTTGAAGGAGCTCAGAAGGAGGCTCGTCTCTTAGCACTGAGCTGTT  
AAGATGAAGAACCTCATATGAGGAAGCTCTGGATCAGCTGGAGACCATGAAGCGTGAAAACAAGAACCTGCAGCAGGAG  
ATCTCAGATCTGACTGAACAGATTGGTGAGACTGGCAAGAGCATCCATGAGCTGGAGAAGGCCAAGAAGCAGGTGGAA  
ACAGAGAAGTCTGAGATCCAGACAGCTCTTGAGGAGGCTGAGGGAACTCTGGAACCGAAGAGTCTAAGATCCTGCGT  
GTCCAGCTGGAGCTCAACCAGATTAAGGGTGAGGTGGACAGGAAGCTCGCAGAAAAAGATGAGGAGATGGAGCAGATC  
AAGAGGAACAGCCAGAGGGTGACTGACTCCATGCAGAGCACTCTGGATTCGAGGTGAGGAGCAGGAATGATGCCTTG  
AGAATCAAGAAGAAGATGGAGGGAGACCTGAATGAGATGAGATTCAGCTGAGCCATGCCAATCGCCAGGCTTCTGAG  
TCCCAGAAGCAGCTGAGGAATGTGCAGGCACAACCTGAAGGATGCTCAACTGCACCTTGATGATGCTGCAGAGCCAG  
GAAGACCTCAAGGAACAGGCTGCTATGGTGGACCGCAGAAAACGGTCTCATGGTGGCTGAAAATTGAGGAACTTAGAGCT  
GCTCTGGAACAGACAGAGAGGTCGCAAGATCGCTGAGCAGGAGCTGGTGGATGCCAGTGAGCGTGTGGACTTCTG  
CACTCTCAGAACAACAGCCTTATGAACACCAAGAAGAAGCTTGAGACTGACCTGGTCCAGATCCAGAGTGAAGTTGAT  
GACACTGTTTCAGGAAGCAAGGAATGCAGAGGAGAAGGCCAAGAAGGCCATCACTGATGCTGCAATGATGGCTGAGGAG  
CTGAAGAAGGAGCAGGATACTAGCGCTCACCTGGAGAGGATGAAGAAGAACCTGGAGGTGCTGTTAAGGACCTGCAG  
CACCGCTGGATGAGGCTGAGAACCTGGCCATGAAGGGTGGCAAGAAGCAGCTCCAGAACTTGAGCTTAGGGTTCGCT  
GAGCTGGAGTCAAGGTTGAGGGTGAGCAGAGACGTGGAGCAGATGCTGTTAAGGGTGTCCGCAAAATACGAGAGGAGG  
GTGAAGGAGCTCACCTATCAGACTGAGGAGGACAAGAAGAACGTTACCAGGCTGCAGGATCTGGTTGACAAGCTGCAG  
CTCAAGGTTAAGGCTACAAGAGGCAGGCTGAGGAAGCGGAGGAGCAGGCCAATGTTTCATCTGTCCAAGTGCAGGAAG  
GTCCAGCATGAGCTGGAGGAGGCTGAGGAGCGTGCTGACATCGCTGAGTCCCAGGTCAACAAGCTGAGAGCCAAGAGC  
CGTACTCTGGCAAGGGA

>Sequ15694EST2

CGACAATCCAGACGACGGGGAGTTTTCTGGGCATGAAGGGGATAAAGGGTCACTGGGCCGACAGGTGGCCGACGAGGT  
GTGGCAGGCGGGGAAAGCGTCAAGGCGTCTAAAGCCTTTAACCTTTATGCCAACATCGACATCCTGAGGCCGTACTTTGA  
CGTGGAGCCGGTTCAAGTCCGAGCAGGCTGATCGAGTCCATGATACCTGTCGCGATGATCAACTTCCCCCAGAAGAT  
CGCAGGTGAGCTGACGGTCTCTGATGCTGGTCTTTACCCTGGTGCCATCCTGCTGCACGGGATGAAGACCTCAGG  
AACTGTCATAAAGGAGGGGACTCTGATGGGCACAGCTATAGGAACGTGTTTCGGGTACTGGCTCGGCTTTCTCCTT  
CATCTACTTCCGCGTACCTGGTCAACGCTCAGATCACCATGCTGCAAAATGCTGTCCCTGCTGGGTTACGGTTTGT  
TGGTCACTGCGCCGTCTCCTCATCACCTACAACATCCACTTCCACTTCTGTTCTACGGTCTGTGGCTGCTGGTTG  
GAGGACTGTCACCTGCGTATGGTGCAGCTCTGCTGCTCGTACAGTCGGACAGACGCCTCGTCTCCTCCTCTGTGGG  
ACTCTGTCTCTGCTGCACATGCTCTTCTGCTCTACTGCCTTCGCTACCACAAGATCGTAGAAGGGGCTGCTAGAC  
ACTCTGGAAGGACCAACCTGGCTCCCATGCAGCGTGTGGCCAGAGACGTGCCTGAACTGACACTCAACGCCACATTG  
AGGAACCTGGGGGCTCACTGAGGGTCCACTGAGGCCACTGAGGCCACTCTCTCATAGACGCTCTCAGTCATCTTTTAAAGAA  
GAAAGTTTCTGTTTCACTATAAAAAGTTCATTGGTGGGAAACCTAAAATAACAGAAATGATCACAACCTCAAAGGTCTGAG  
TGGAATCACATCAGCATGTGACAACCTGAGCAGATGAAGACCATGACGGCTCTGAAAAAGCTAATAAGTGGCCTTTGA  
GTAGAGATGATTTCTGTGTTAATGGCCTCTGAAGATGAAGCTTCATGTTCAAGAGTCAAACGTTTTCTCTCTCAGCTC  
TTGTACATTTTTTATTCATTTCTGTAACATTTTTGTTTTGGCTTTGGTGTGTTGTTCTCTCATGTTTCAGATGTATTTATAG  
TTTTCTGTACAGAAAACCCGAGTAAACTTTATGGACTTTGGTGGGACTGACTGAGATAATCCACACTTTATTTAGTAAA  
ACGACATCATTTAAATTTACAACAGATTTCTTCTGACATTTGGTATTTCATCTATCAGCAGAGTTTTCAAGATGAA  
TGTTTGGCGTCTCAAAAACATTATAATGATCAAGATTATTTAATTGTAAGCAGAAAAATCTGAGGTCAAACAGCAGCT  
TAATTCAGACTTAATGCAGAGTTCACGCTTCATTTGTAATAATAACTCCACCATTAACCTAATTCACAAGACAAAAGT  
ATCATCAGAAATAGTTAAAGACAAAAGTAAAAGTACCCAGTATGCAGAGTCATATATAATGCTGTATTATAAATAC  
TGATGCATTAATGTGTTCACTTTAATGGTTTTATTTGAATTTATTTATATCTGCTGGGTAGTTTTGTAATTTCCC  
CTGTGGATGAATAAAGTTTTATCT

>Sequ15704SNP2

TCGATTGCCTTTGTTCCACTTCGATTGTAAGGCATTTATGGATGAACCATCTGATTTCAAGGAAGGCATAACTCTTTTC  
TAGTCAGTCTTCAAACGGAAACCCCTAAAATTGAACGAGGGGGGACAAAATTGCTCACGTGAAATTAATAAATGTTGTTTT  
TAAATCAGCACATTCTCAGGCAATGTAACGCACTGGCCAATCAAATCTTTGGGATGCGTTTTGCAGAAAAACAATTA  
ATCCAACATCTTAC

>Sequ15758SNP2

CGGATGTGTCTGACTAGTGTAGCTAGAGGACACAGTCTGTCTCAGTGCGGCGCTGACCTCCGGCTGTGATGAGAA  
AAGTCAAATGGCGGGGAGCAGACTAGAGAAGTTTGAACCCGATTCACCCGGGTTTCGAGACCTGATGCGCTCCGGAGT  
CATAAAGCCGTCAGAGAAACCCGCTCTGGTATGATGTGTACCAGGCTTTCCACCGAAGAGGGACCCGCTCCACGTGAA  
GCCACACTTCAGACCCAGCACCAAGAAACAGGAGACGGTGCCTGAGATCTTCTACAGAGAGGATGAAGTGAGAGCGAA  
GTTCTATGAGCGCTACGGGGCGGGCGGCCTCTCGATCTCGCCAAATCAAATCTTGTCTCTACGTGTGAGAGATTTGT  
GGACAAGTACACGGAGTTAAAGAGCCGAGCGAGCTGGATGACTCCGCCCTGTTTGGAGGAGACTGGGAAGGCTTTACT  
CGCCGAGGGCATCGTGTGAGGAGGAGAGGAGCTCCTCCTGTGGCAGCAGAGTCCAGGGATCCGGTGTGAGACTGAA  
GCTGACAGACATGCTGGCAGAGCAGCAGTCAAGCCGGTGTGGACAGCAAAGAGACAGTGGACCACAGCGCACACACACA  
CACATCATAGACTTCAACTGGAGAGCGAGTGGACGAGCTGCAGATTTCTGCACTCGAGACGTGTGAGCGACATTAGACG  
CTGTGGTCTGTTGCTGCTCCTCCAGTCCGTCATGGATCTGCTCTCTGGACTGTGTGAAGACCAGCTTCATGTTTCT  
GACGTCACCTTAGATATAAAATCACTGCGAGCCACAAACGCTGAGTCTACATCACAGCAGAGGATGGGCTGTAAAATAC  
CTGGACATGGTCTATGCACATGTTTTATATATATAACACATGATTTATGTACAGACAGGTGCAAATTAAGGAAGAAC  
CAACATACAGTGTGTTAGTCAGGTGTTGTTTCCATCCCGTGTCTCCAGAGCAGCGTCACTGCTCCAGGTCTCGTATTTCC  
TCATGTGATGACGGAGGTGCAGAGCGCCGCTGACACGTCGCTCCAACATAGCCCATGGGNTTTCACCTGGACTGATG  
GGAGGGTCTGTTCCAGGACGACAGTGTCTCCACCCACAGGACACCAGGGCTCACTGA

>Sequ15767EST2

GGACTTTCTCCTCCAGCTGAAGCAGAAAGACAGCCTTCTTACCCTCATCACCAGACATCATGACGTCCATGATGATG  
CGAAGCTCCAGGTCCATGGGTGGCGGGCCTACAGGGCCAGCGCGGCTCCATGCACGGAGGTGCTGGTGGCAGCAGT  
GTCCGTATCTCCTCTGGCGGCTCCTCCATGTCCATGTATGTTGGTGGCGGGTGGAAAGTGGTGGAGCGTCTACAGC  
TTCAGCTACGGCGGTGAGGTTGGTGGCGGGCGGGTTTGGCGGGTTCGGTGGCGCCGGCGGGCGGGCGGGCGGCAC  
AGCATGGACATCTCGGCCAACGAGAAGGCCACCATGCAGAACCTGAACGACCGTCTGGCCACGTACCTGGAGAAGGTC  
CGCAAGCTGGAGGCGGCCAACGCCGAGCTGGAGCTGAAGATCAGGCAGTTCCTGGAGAGCAAGACCGCCCCCTCCTCC  
AGAGACTACAGCGCTTCTACGTCAACATCGCAGAGCTGCAGGGAAAGATCCAGGACGCCACCAAAGTCAACGGTGGC  
ATCTACCTCGCCATTGACAACGCCAAGCTGGCCGCGCAGCACTTCCAGGCTCAAGTTCGAGAACGAGCTGGCCATGCGT  
CAGTCGGTGGAGGCGCACATCGCCGGGCTGAGGAGGGTTCCTGGACGAGTCACTCTGGCCAGGACCGACCTGGAGATG  
CAGATCGAGGTTGAAAGGAGGAGCTGATCTTCTCAAGAAGAACCAGGAGGAGCTGCTGGCCATGCGAGTCAAGT  
ATGAGCGGACAGGTGAACGTGGAGGTGGACGCGCTCCTCAGGAGGACCTCAACAAAATCCTGGAGGAGATGAGAGAG  
TACTACGAGTCCGTACCGCCAAGAGCCGCAAAGACCTGGAGGCTGGTTCAGGCCAAGTCAGAAACACTAAACAAA  
GAAGTCGCCGCCAGCACAGAAACCATCCAGACGTCGAAGTCGGAGCTCACAGAGATCAAACGGACGCTGCAGGGCCTG  
GAGATCGAGCTGCAGTCAAGACTCAGCATGAAAGCCGGTCTGGAGGGAAACCTGGCTGAGACTCAGAGCCGGTACGCC  
ATGCAGCTGGCCGTTACCAGAACAGGTAGTCACTGCTGGAGGAGCAGTGGTGCAGCTGAGGGCCGACCTGGAGCGT  
CAGGGACAGGAGTACCAGATGCTGTGCACATCAAGACCAGTGGAGATGGAGATCGCCGAGTACAGGAGGCTGCTG  
GACGGAGAGGGCGGGCAGCATCTCCACCTCCTCCTCCTCCTCCTCCTCCTCCTCCTCCTCCTCCTCCTCCTCCTCCT  
TCCAACCTCCACCTCCACCTCCTCCACCACCACCAAAACAGAAAGTCATCACAGTCATAGAGGAGATCGTGGATGGAAG  
GTGGTGGCTCCACAGAGACCGTCACTCCAGCGAGTGGACCAACTGCTCTCACTGCACCTCTCAAAAAAATAAAA  
GTCTGCTGAGGTGCTTCAAAAAAAAAAAAAA

>Sequ15789EST2

ATTTTCCACAGTAAAAATTTATGCTTCGGCTTTGCTCAGAGCCAGATTCCAAACCTGAACAACGCTCAGACGCCTCGTT  
CAGACAGCAACCAGTCTAACCACAAGTTGATTGAGCTTTTTTTTTCTTTTATATCACTGACATTGATCGCACTTTTC  
ATGGAGACAAAAATACTGACCTTGTGACATCTTTGAAGAAACACTGCGACACCATCATAGCTGCAGTGTAAAAAAT  
CTAGTTGAAAACATACGCTGAAAACAAGATCACCATTTTGCATAGGTCGACTCTTTCATCTCCAACAATGTACCATGGC  
ACAGACACAACACTAGTACACAGAAACAAAACATTTCTCCAGTTTACTCTTTTGTAAATTTGTTAATATCAATAAT  
AAAGTTTTTACAGTTTGGCACACCGTACGAAACAATATCAAACGCACAATACTATGTGTCAATATAAGGGATAAATG  
ATTTATTAATCAAGTCTTTGTTTTCATCTGTACAACAAAACAGTACATTGTAGTCTGGAGTTTCTGACCTCCGGGAC  
ACTGTACACAGTCAAGCACATTTAGCACGTTGGGTTGGAAAGGTAGAAAATATCACATCAGCACAAACAATCTTCCAC  
TACCTCATAACTCGAGAGAAATCATTTTCCATTTGTCGTATGTTTTCATGTGGTTGTAATTTGTGGTGTATCCAGTA  
ATCTTGTAGGAGAGATTTCCACAAAGAGGAAGTCGGAGCAGTACAGGTTAGTAACACATTAATTTTAAAAAACGGTT  
GAACATTTCTGTAGCGAACGCCACTTTTTAGTGTCTAAAAGAGCAAGAAGGGCACACCAAAAAGTGAAGAGAATTAG  
GCAAATACACTTTAAAATFATGCAAGAATTTTTGCAATCCTAACGCCACGTGGCTCTGTGGAAATGATCTGCTTCACT  
GATCCGTTTCAATAATTTTCTTAAAGGTATTTTCAAGAGGAGGAGAAGCTTCTTCTTAGTGTCCGGACACAGTGGGTT  
GTCATCTTCTTGGCAGCTCTTTCAGACACCACCTTGGATGTTTTCTCGGGGCTGGGAGCTGGACTGGGATTCGGAGTG  
TTTGCTGCGCTGTTCGGATACTCCCTGTTGCCGAATATGATGCTGCCACTCGCACGTTGGTGGCGCCAACCTCGATC  
GCATGTTCAAAGTCTGTGGACATACCCATGCTGAGCTCCACCTCCCTCCAGAGGCAGCTTCAGACTGTACACACCTCC  
TGCTCCGACTCAGCAGCATTTGAAAGTCCGGGTTGGGACCCAGGTTGAGGTTGAGCCATAGCCCCGATGGTCTATG  
AGTCTGAGAAGTGAAGGGCAGAACACTGGGACAGTGTGTTTTACGGTGTTCACCGTCTCCTCCGGGGCAGGCCA  
TGTTTACTCTGTTCTCCGCTGGTGTGATCTGCACCATGACCTTTTAAACCTCTGCATGACTGGCTCCCCTGAGCCGCT  
GCCATGAGCTGTTGACCTTGTGCGCCAGTTTTTCGCCGAGTCAACCGTCTCAACGAGGAACAGGTTTGGCACGCCCAGA  
AGTTTTGTTGACATATTTCTTGTAGGTGGCCGATGAAGTCCACTTGATTTCCGGACATGATTTAAAATCAGAGGA  
TCTGAAGCTTTGTCCACAAGTTCATTAACGTAATTTTCTCAAAGTTGCGCTGCCCTTGTCTGTAGGCCCTCCACAACC  
ATCTCTGGTGGTTTTAGTCTTGTGCTGACAGCTACGAGGCGGGGCGGCACAGCCGGCAGTGTCTTGGGCGCCGTGCCGC  
GCCTGTTTTACCCGATCCACTACAGACTGTAGCGCTTCCCAACCTCCTCCGACATTGCTACTTTT



GAATATTATTGTTGTTGGTCTCAGAATCACAGCACTGCAAAATGATACCGAGCTATGATCCCAAAATATGTTCTCTCC  
ATGATAAAAATCACAATCTAACT

>Sequ16779SNP3

ACCAACACCATGGCAACAGGACTACGTACCCCCCGCACCCCTGCTGCCAGGACAGGATACTACAGGAAGCCAGAAC  
CTGATGGCTCTGACCAACATCGACACTCCCCTGAAGGGAGGCCCTCAACACTCCGCTGCACGAGAGCGACTTCAGTGGA  
GTGACGCCCTCAGCGCCAGCAGATACAGACACCCAACTGTTCTCAGCACACCATTCAGAACTCCCGGACCAGGTCAA  
GGGTCAGAGAGTATGACCCCTCAAGCCGGAGGAGTGATGACACCCGCTGGGGCCGTCACCCCAAGTTTACCCCTGGC  
CGTACACCCCTGAGAGACAACTGAATATTAACAGTGAGGAGCAACTGACTGACCCCTGCGTACGCTAAACACATGCAA  
AGGGAAAGCCTGCAGCAGCTGAGGCAGGGACTGATGTCACTTCCCTGTTCCCTAAGAACGATTTTGAGATTGTTCTTCCA  
GAAAACGCAGAGAAAAGAACTCGAGGAAAACAGAAACGGACACCCGGTTCTGGAGGACTCGGCCGACATAGAGGCGCGC  
AAGCAGGCTGTACGGGAGGCAGAAAGAGAGAAGGAGCTGAAGCTGCGACACACTGCTGTTTACAGAGGAGTCTCCCCAGA  
CCTACTGAGGTAAACGAGTCCGCTCCTCCGTCCTCCGCTCCATAGAGGCGCTCCCTGACCTCCAGCTGGCCGAGGAGCTG  
ATCAAACAGGAGATGATCACCATGCTGCACCACGACTGCCTGCACCACCCGTCGGCCAACGCCGCAACAGCTGCAG  
CGCGGCAAAAGCAGAGGCCCACTCCACATCTAAACAACGCGTCGCACATATCTTACCTGGAAAACACACCCCTACAAGC  
CGATCAGCACAGAGGAGATGGAGCAGGCTAAAGCAATGCTGGCAGCAGAAAATGGAGGTAGTGAAGACAGGAATGGGCC  
ACGGTGACCTCAGCATGGAGGCCACAGCCAGGTGTGGGAGGAATGCTACGGACAGGTGTTATATCTACCTGGTCAGA  
ACAGATACACCCGAGCTAACCTGGCATCAAAGAAAGATCGTATCGAAAGCCTGGAGAAAAAACTAGATGTGAACCGTG  
GTCACATGACAGCGAGGCCAGGAGAGCAGCCAAGCTGGAGAAGAAGCTCAAAATCCTGCTGGGAGGGTTTCAGTCCA  
GAGCGCTGGGGCTCCTGAAGCAGCACAATGAACTCTGGGAACAGGTGGAGCAGGCAGCCACAGAGCTCCAGACCTTCA  
CTCAGCTGAAGAAACAGGAAGATACGGCCATTCCCAGGAGACAAGAGGGTCTGCGGGAGGACGTTGGAGAGGCAGATGG  
AGAGAGCGAGAGGTCACAGCAGAGATACGGAGAGTTGCTGATGGAGAGGGAGTCGCTGATCAACAGCGCTCAGAAAT  
ACTGAGCAACACACGCTAATCACACACACACACGCGCGCTACACACACTCAAATCCTCCTCATGGAGACACGGA  
TATCAAGCGAACAGCAGCTCTGAGGAACACAAAGGTTTCCGAGTCGACGTAATAACCTTCTATCATTTTTTCAATTA  
TTCAATTGTTGCGGCATTTCCAGAGATAAGCCCCGCTCCATGTGCTCATGTTGCTATGATGTCACACGCTGAGTTTTT  
GAGCATGCTCAGTAGCCCCTTTT

>Sequ16785SNP3

GTGTTATTTCCGGTGCAAAGGTCGTAGTTACTATAGGTCAATGTGTCTTCCACACGTGTGTTTTCTGTGATCTTCCAG  
CAGCAGTAACGGGACTCAGCCGGTCTGTGTGCTGTCAAACCTATTTATTTCTGTGTTACACGCTTAAATATTTCTAA  
CATGCTAAAGTCCGTTGGTCCGCGCGGTGGGAGCCGCTGTCCGCATGCTCTCAGCCACCACGTCCACAGCCCGGGCTCT  
GCCGCTCAGCTGCCCCGACTCTGTGCTCTCCGTTGTTCCGGTACAACCGGGCCCTTCAACCCGGTCTCTGTGGATGCTGAA  
CAGCAAAAGGACCTCGTCAGGATACAGGCCAAAATGTTTCAGTTCAAAGGTGTGCAACCCACGGTGTCTGTGGATG  
TGGAGGACTGCACACAGAAGGTGACAAAGCATTTGGTGATTTCCTGTCTGATGAACTCAAAGAAGAGAAGAAGATCCA  
GAAAACAAAACCTCTTCCCTAAGCTGTCTGGAGGATGGGAGCTGGAGATGAATGGCACAGAAGCTAAA-CTCACAAGAA  
GTGTTTTCTGGAGAGAAA-TCTCTGTCTCATTCAACGTCAACAACAGCATTCCTCCTAACTTTGAGGAAGAGGCAGAA  
CAAGGTCAGCAGAAGTCAGCAGAGGAAGAGCCTGAAATTTGTGTCAACTCCCAATTTTGTGTTGAAGTCACAAAACAG  
GCTTCAAACATTTCCCTGGTGTGTTGACTGCCATTTCCCTGAAGACGAGATGAGTCATGGCGAAGGA GAAGAGGAGAGC  
GACATCTTTGCCATCCGTGAGGTCAGTTTCCAGCCTGAGGGAGATACAGACTGGAAGGAGACCAGCTACACACTCAAC  
ACAGCTCTCTGGACTGGGCCCTGTATGACCACTTGTGACTTTCCTGGCCGACCGTGGGATCCGACAAACCTTTGCT  
GATGAACTGATGGAGCTGAGCACCGCCATTGAGCATCAAGAGTACATTAAGTTCCCTGGAAGACCTCCAAGGCTTTGTC  
AAATGTAACATAATGTTAGATAGAAGCTAAATTTCACTTTTCTTCAGTACACATCCGGAGATAGGATGATACAGTAAGA  
CTAAAGCAAAATGAAAGCACTGAATGATTGATTTGTTTCAGCGCACGAAGGAGACTGATGGTTGTGTCTGTGACAGTGAG  
CCTTGTGTCAGCAACTGTCACTAAGACTTATCTGCAAAACATCTTTCCCTTTGGTGAATGTGACTTTATTTTTCTGTA  
ACTTAAACAACATAGTTTAAATTAATATTTAAAGGCCATAAATAATGTAGGTGATGATAATCGTGCAGAAACCGTCA  
TTGTAAGAAATGCTCTCAATTTTAGAGTTCTGTCTTAACTCAACCGCTTCAGGAGGGTCCAGTCAGTATTTATGAA  
TGTTCACTTTCCAATAAAGGACAAAATTTGTCAAGGTGCAAATTCAAA

>Sequ16798SNP3

CTTATCATCGACACCGGGGCGTACAGAGCGCCTTCTCTGCTGCCCGCACGAGAGAGACACAGCACCGTCCCTTGACACA  
CAGTTAGGCCGAAAGATCCAGAACCATGTCCATCCTGAAGATCCACGCCGTGAGATTTTACTCCCGTGGAACCC  
CCACTGTGGAGTTGATCTCTACACCAAGAAAGGCTTTTTTTCAGAGCTGCAGTACCCAGTGGTGTCTCCACAGGCATCT  
ATGAGGCTCTGGAGCTCCGCGACAATGACAAAACACGCTACATGGGCAAAGGTGTCTCAAAGCTGTTGAGCATATCA  
ATAAAACAATGACCTGCACTGGTTAGCAAGGATGTGAGTGTACGGAGCAGGAGAAGATTGACAAGCTGATGCTGG  
ACATGGATGGCACAGAAAACAAGTCTAAGTTTGGTGCTAATGCCATCCTGGGCGCTCCTCCCTGGCTGTGTGCAAGGCTG  
GTGCAGCAGAGAAGGGTGTCCCCCTTACCGCCACATTTGCTGACCTGGCTGGCAACCCCTGAAGTCATCCTCCCAGTCC  
CTGCTTTCAACGTCATCAATGGCGGCTCTCATGAGCAAGCAACAGCTGCCATGCAAGGAGTTCATGATCCTGCCTGTGG  
GAGCAAGCAGCTTCAAGGAAGCCATGCGTATTGGTGTGAGGCTTACCACAACCTGAAGAATGTATCAAGGAGAAAT  
ATGGCAAGGACGCCACCAATGTAGGGGACGAAGGAGGCTTCGCCCCAACATCCTGGAGAACAAGGAAGCTCTGGAGC  
TGCTGAAGAACGCCATCGTAAGGCCGCTACACTGATAAGATTGTTATTGGCATGGATGTGGCCGCTCAGAATTCT  
ACAAAGGTGAAAAGTACGACCTGGACTTCAAGTCTCCTGACGACCCTAGCCGCTACATTTCTCTGACAAGCTGGCTG  
ACCTCTACAGGAGCTTTGTCAAAGATTACCCTGTTGTGCTCATTTGAGGACCCCTTTGACCAGGATGACTGGGAGGGAT  
GGTCCAAATTCATGCCAGCACCAGTATCCAGTGGTGGTGATGACCTCACTGTCAACCAACCCAAACGCATCCGCA  
AGGGCGTACTGAAAAGCCCTGCAACTGCTACTCAAAGTCAACCAGATTGGCTCTGTACAGAGTCCCTGCAGG  
CCTGCAAGATGGCCAGAGTAGCGGCTGGGGTGTGATGGTTAGCCATCGCTCTGGAGAGACAGAGGATACCTTCATTG  
CTGACCTGGTGGTGGTCTCTGCACTGGACAGATCAAGACAGGTGCACCTGCCGATCCGAGCGCTTGGCCAAGTACA  
ACCAGTTGCTCAGGATTGAAGAGGAGCTCGGCGACAAGGCCGTTTTGCTGGCCAGAACTTCAGGCACCCCATCTGAG  
CAGGCTTTGTTCCACGGGCCACTGTGTGTTTCAATGCTCATAAATAACCCCAACATATACGCCACGCTAGGTGCCT  
GTCCTGTCTGGAGAGAAGATGGAGAAAAACACCGCTGAAATCCAAGTCCAAGTCTGTGGTCTGTGGCGTGGAGAAGC  
TGCAGTACGCTTAGTACAACCACAGTTTCACTTCACTAAAACATATGCTTTAGCTCCTGATTAGTGTGCTGGTCCCTAT

TTTTGTGTCCGTATAACTGTGTGAGAGATTTTTCTTAGCTTCTTGTGAGTTGTTGTAATTTTTGGTCCCTACTGAGT  
ATTTGAGCTACTGTAACCTTAGTATGGCTCTGCCTCGAGCAGTGGTAAGAGTACTGTATGTTCAATCTGTGCGCATCTG  
ACAAGGTCTCGTGTGCTGTAAGCGTTTGGCAGT

>Sequ17206EST2

GGGGTTTTGAGCCCCGTCAGCCACCGTATCAGGCTGAGCATGAGACTGAGCTAAGCCAGTTATCGAAGGTTAACACAA  
ACCTTTGGCTGCAACTTTAAGAAGCTGCAACCTGCAACTAAACTGTTGCTTTGTACATCGGTCTGTGTTTCTGCTTC  
TGTACATTTGCTGGCCACCGGCGAACTTTACAGACAGTAGGTAAGACACTTGTTTAAGAGCAGTTAGCATCAGTTAGC  
TCTAGGCTAATGTTAATTAGTAGGGCAGCAGGCTAAGTGAATCAGTTCCTCCCTGTTTGTGCTGCAGTTTTATTGATCAGT  
AAAGACTCTGGACTCTGAGATCTGCGAACCTGCGAACCTGCGATGTTGTGATCATTGTCAGGTCAACTCTCACAAA  
TACAGGGGCTTGTGGGTGCCCAGTCAGTCTGTGGTTCAGAGCCATGTGCTTTCAGCTGCTCCTACCTCTCCTTACACC  
ACCCTGGCCATCAGCCACCGGCAGAGTCTGTACACATGTGGAGCTTACCCTGCTGAGAAACGCAATGCCATGAAC  
AAAGCCTTCTGGAGTGAGATGGTGGATTGCTTTAATGAAATAGCCGGAGACCGGACTGCAGAGTGGTGGTGGTTTCT  
GGAGCAGGGAAGATCTTACAGCTGGTATTGACCTGATGGACATGGCCAGCGACGTACTCCAGCCACAGGGCGACGAC  
ACGGCCAGAGTTTCTTGAACCTCAGACAAAAGATCGCCAAGTATCAAGAGACATCTCCGTCATAGAGAAGTGTCCA  
AAGCCTGTTGTGGTGGCCGTCACGGAGCCTGTGTGCGAGGAGGTTGACTTGTGATCAGCCTGTGACATCCGCTG  
TGTACCCAGGACGCTGGTTCAGGTCAAGGAAGTTGATATCGGGCTTGCAGCAGACGTTGGGACTCTCCAGAGACTT  
CCTAAAGTCATTTGGTAGCAGCAGCCTGGTGAACGACTTGGCTTTGACCGCCAGGAAGATGTATGCAGATGAAGCCAAG  
AGCAGCGGCTGGTCAGCCGAGTGTTCAGATAAAGGAGGCCATGATGGCCGGACTCTGGAGATGGCCGATGAGATT  
GCTGCTCGCAGTCTATAGCTGTGCAGGGCACAAAATCAACCTCATCTACGCCAGAGACCACAGTGTGGCAGAGGGA  
CTGGACTACATGGCCACGTGGAACATGAGCATGCTTCAGACTCAAGATGTGATGAAATCCGCTCAGGCTGCCATGGAG  
AAGAAGAGTCCAAGACAATAGCCTTCTCAAACCTGAACCTCAGTGGGCACAGTTCAGATATAACACAATTTGTGG  
CCTTCTGTGGGAAGGGGATCCAGTCTGTTCTACTCTGAGCTTTTAAACCCCCCGTTTTGTACATCTGTAATGACT  
TCATGAATGTTTTACCTTATTAATAAAGAAAACCTCATTTGAAAAGACTAAAAAAAAAAAA

>Sequ17703SNP3

AGCCACATATCGCCGTCACCTGCAGCGTACGTTTATACATAACCGAGCAGGTGGTGGATGACCTTCCTAGTTTGCATGTG  
CAACGTGTGAATCTTAATTTGTAGTGTTCAGCATGTTGTCAATGGATGACTTTGACAGCCACAGTTTAAATAGCTATGA  
CAATTTTTGTAATTTTTTCGACACATCAACGTATTTTATTTTAAATCACGTGGTGTGTGTTGCTCTTTTTTAAAGCCAA  
TGGGGTGTACGCGCCGCTAAACAAACCAATGAAAAATCGTGATGTCAGAAAACAGGGAGTGAAAGCTAGGTGCTCC  
GACTACAGCAGTGTGCTGTAATAATGTGCGCCGTAACAAACGGATAATACGTTAAAAGACGCGGTTTATCCAGCGGAGA  
CAGGAGAGTACTTCTCTCAATCCGTGTGATTGGTTTTCCGTTTCCGTCAGGCGATGGTGCAGGGCTGTTTGGGCGGTG  
CTTCCGGAGAGTGTCTGCGACAGGGCCGCTGCTGAAACCAACGTACCTGCAACTGGGAGAGCCGCAGCACTGTGG  
AGCAGACCCGTCGCGACGCTATCATTACCTGCTGCAGAGCTTTAGCCAGTGTGAGGTGAGACACCTGCAGTCTACAGTC  
AGAATGCCTGAGATAACCCACAGATCACCTGGACGAGAAGCAGGTGCAGCTACTGGCTGAAATGTGCATCCTCATCGAC  
GAGAACGACAGCAGGACCGGAGCTGATACCAAGAAAACCTGCCACCTCAACTCCAACATCGACAAAAGGTTTATTGCAC  
AGAGCCTTCAGCCTCTTCAATTTCAACAGTGAAGAGAAGCTGCTCTTACAACAGCGGCTGATGCCCCAAATCACTTTT  
CCAGCTGTTTTCAAAAACAGATGCTGCAGTATCCTCTACACACAGCAGTGTGAGCTGGAGGAGAAGGATGCTATAGGA  
GTGAGGAGAGCTGCTCAGAGAGACTCAAAGCTGAACTGGGTATCCCCGATGGAACAGGTGACACCAGATGAAATGAC  
ATATCTAACAGGATCCACTACAAGGCCAGTCAAGCGGTTTTGGGGAGAACATGAGATCGACTACATCCTCTTCAT  
GCAGAAGGACGTGGAGTTGAGTCCCGACCCCAACGAGATCAAAGCCACTGTTATGTGAGCAAGGAGGAGCTGAAGGA  
GATGTTAGAGAAGGCCAAGCGCAAGGAACCTGGAGATCACACCTTGGTTTACGCTCATCGCAGAGACCTTCTCTTCAA  
GTGGTGGGACAACCTGCAGAACCTCAAACAGTTCATGGATCACAACAACATCCACCGCATGTAACATAACAGGAAT  
CAGCCTTACCTGTTGCTCTCAAAAACCTGCTTGTGTACAGTACTTGCCTGACATTCAGCTAAGCTAGCCTAAGCTG  
CTGGAGACGCTGACCTCAGATCACTGGCCATTTATGTCAAGTTGTTGTAAGTGTAGGATTTCTGCACTAAATAAG  
GAATGTTTTAGCCTTGCTAAAAGTAAGAGGTGACATGGTTTTACAGTGGTTTTGTAGCTGTAGGTTGTAAGTGTGAA  
CACAAGAGGTGATTTCTATTGATTCTAGAGTCTTTAATAAAGAAAATGTCATGTAGACAATTTCTAATGGATTACAGAC  
TGAATAGAAGATGTCGAATGTCTTAATTTATTAGGCAGAAAATGAAGAGAATAGCATATTTTTATATAAAAATGTGAA  
GTGCCTGAGTACAGTCTTTAAGCTGAGGTAATAGAGTCTCCAAGTCAACAACCACTGTCACTCTGTATTTGTTT  
ACAATGATATCAGTGAACAAACTGAATCTTTGACCC

>Sequ18816SNP3

GCAGTGGGCGGAGCATACTAGGTCTGACGGGAAGGTCTTTTTGTTTTGGGCCGCTGAGAGATTGACACTTGGTTTTGA  
TTCCCTTGTTAAACAACCGTTTTTTATCTGCATTAATTTCCGGTGTCTTTTATGAATAATCAAAGCAGCAAAAGCCA  
ACGCTAACCGGCCAGCCTTTCAAACGAGGAAAAGAGATGAAAAGGAGAGATTTGACCCTACTCAGTTTTCAAGAAAGT  
ATCGTACAAGGCTGAATCAAACCTGGCACTGATTTGGAAGCGGTGCGCAAGTTCCCTGATGCTCTGGCGCCAAGCTT  
GACTACCGCCGATGACGAGACACTCTTTGACATCCTGGTGGCCGTTGGATGCTGGCCCGGACTCTATCT  
GACGACATGACCCGACCGGATTTGCTCTTACGGCACAAAGAAGACCTGGAGACAATGCAAGCATATGCTCAGGTT  
TTTAAACAAGCTGATCAGGCGTTACAAGTACCTGGAGAAGGTTTTCGAGGAGGAGATCAAGAAGTTGCTGCTGTTTCTA  
AAAGGTTTCCAGGCTGAGCGCAACAAGCTGGCCATGCTGACCGGTATCCTGCTGGCCAACGGCAACATATCGGCC  
TCCATCCTGAGCAGCTCTTCAACGAGAACCTCGTCAAAGAGGGAGTATTCGACGCTTCGCTGTCAAGCTGTTCAAG  
TCATGGATCAATGAGAAGGACATCAACTCTGTGCGCCGAGTCTCCGCAAAGTCCGATGGACAACAGGCTGATGGAA  
CTCTTTCTGCCAACAAACGAGCTGCGGACTTTTTCAAGTACTTACTGACGCGGGCTGAAGGAGTATCCGACT  
TCGCCCCAAACCAATCCATCGGTGCCCGCAAGGAGTGCAGAAGGAGCTACAGGAGATGATGGCCCGGCTGACC  
CTCAGAAGGAGATTATCGCCTTACCAAAGAGGAAATGAAAAGGCCAGCCTCTCTGAGCAGGCCATGATCAGCATCA  
TCTGGACCAGTGTGATGAGCTCCGTGGAGTGGAAACAAAAGGAAGAGCTGGTGACCGAACAAGCCATCAAACACTTGA  
AGCAATACAGCCTCTGCTGAAAGCCTTACCTCCAGGGTCTGTCTGAGCTCAGCCTGCTACTGAAGATTGAGGAGT  
ACTGCTACGACAACATCCACTTCATGAAGGCCTTTGAGAAGATCGTGGTGTCTCTTACAAAAGCGGATGTATTGAGCG  
AAGAGGCCATACTGAAGTGGTACACCGAAGCCACCTTGCCAAAGGGGAAGAGTGTTCCTGGAGCAGATGAAAAAAT  
TTGTCGAGTGGCTGAAGAATGCAGAGGAAGAGTCCGAGTCCGAGGAGGAGCAAGCAGACTAAAACCTCCATCGCCAGA

TGAGCTTTTCTTTTTTCTTTTTTTTTTTTTTTTTTTTTTTAACAAGCAGGAGCAGTAGAATGTGTTTTCCCTTCTTTCTC  
TTCTACCTCCTGTTACTACTTTATCCCCAAACACACACACCTCCACTTAAACATTTAAACGTTAATTAAGCAAAATAA  
AAAAGGGCTCAGTCCCTATTCGTAATGTTGTATGTCGGCTGACAGTGGAAAGCGGAAAACATATGGATCCTCCTCTCT  
TTATTTTTGGGTATTTATTTGTAATGCCTTCTGTAAATTTGGATACAAAACATTTCCATGTATCTCTATAGCCGCTG  
CTTGTATGAATCTGAACCAGAATTTGGTAAAAAATCAAGTTTGCCTTTTTTGCATGCGACTACGAGGCTGACAAAAAT  
GTTAATGTAATTCAGCCAAAGTTTCTTATTCTTTCTTTCTCCCTCTCCTTTT

>Sequ19173SNP3

GGGGGGTTAACAAGGCCAGTGGGTGGGAAGGGAGACATAGATGGAGGGGGCGAGAGGGAGAGGATGATGGTTCGGGTG  
GGGAGAACGAAACAGAGAGCTGTTAGTGGGCAGAGGGGAAGCCAGGTAGAGTTATTAGACCTCTGTGTTAACTCTC  
AGAGACGGCCGGGATACGTGAGAGAAGACATGACCAACATCCTGAGGTGACAAAATAAAGGTTTTACTTGGAGGAAAAT  
CACAACCATCTCGTAGTCGATTGAAATGTGGGACGCTGACTCTGCCTTTCTGCAGAAATGGGTAACATATCAAGGG  
AAGACATAGAGCTGGTTGACTGGTTTTGACTGGTATACGAATAGATTTATGATTACAGTGGAGAAAATGTTTATCATGA  
AAAGATTTATAACATTCAGTAGGTTTTCTCGCTTAGATTTTTAGAGCCCCGGTGTGAAAATTTGATATATGTTGTTTG  
AAGTTTTACTTAATTTGATGAGGAAATTTCTTCAGCTGCGGTTATTCATTTTTCTGGAAAAGCTATAGACACATTCAG  
TTCAGCTTTGCAGCGTTTGGAGAATAAGCTCCTGTGGTCACAACAGAACCTCGTGTGGAGCGTTGAATAACAGAGGTCAC  
TGTGTAACACTCCATGATACATTTTCCAGCACAAATGGAGTCATTTTTCCAGGTATAATGTTGCTGCTACTTCTACCC  
AGAGAACCTACAGCTCTGTTTGTGCCTACTCACACCAATCTATCATCTGTATTTGATCATGTGGCCATATCAATGAAT  
TAAAGCATTTGCAACTGGTACACCTTCATGGATTCTGCTTTTTTTTACTTTTTTTGGTTAGTTGACATCT

>Sequ20292EST2

GCCCCGGTCAAAACCGGCCAGTGTTTACGTAACCTTTGGCGTAGACTACATAGGCGACCATGACGTTAGCATGGGAGGC  
CACACCTGTCTGCAGTGGGCGTCGCCGAGGCCACGGCCCTCAGCCGGGACAAGGAGTTCATCCCAGAAGTCAGCCTG  
CAGGGGAACAAGTGTGTAACCTGACAACGACCCCGAGGGCCCTGGTGTACGTGGAGGTACCTGGAAATGTGACC  
GTGGACTACTGTGACCTGCATCTCTGTGAGGACCAGTTGCTTGTGACTTGTGACAACAGAGACTGGAGGGACGGAG  
CGCTCCGTCCTGGGTCCCAACAGGAAAACCTTTTTCAATCCTCGTACCTTTGGACAAGGAGAGAGTGTGACTG  
CGCCCCGTTTGAAGAAGGGTAAAAAGGACACGAAGGAGGAAGAGCTGTGGAGTCGTA CAGAGACAAACGCATC  
GTTGGGGTGCAGCGGATGTGGCCCTCAGCACCATGGCAGGTGATGCTGTACAAGCGCAGCCCCAGGAGCTGCTG  
TGTGGAGCCAGTCTGATCAGTGTCAATGGATCCTCACCGCCGCTCAGTGCATCCTCTACCCGCCCTGGAACAAGAAC  
TTCACCAGCAAGGACATACTGGTCCGCCTGGGGAACACAACAGAGCCAAGTTTGAGCGCGGCACCCGAGAAGATCGTG  
GCAATTTGATGACATCATCGTCCATCCCAAGTACAACCTGGAAGGAAAACCTGAACCGTGACATCGCTTTGCTGCACCTG  
AGACGGCCAGTCAATTCACAGATGAGATCTTCCCCGTGTGCCTGCCAGCAGGAAGGTGCGCCAGACCCTTATGACA  
GAGGCTATAAGGGCCGAGTACCGGTTGGGGGAACCTGAAGGAAACCTGGAACCCATCAGCAAGAAATTTACCAACG  
GTCCTCCAGCAAAATCCACCTGCCAATCCAGGACCAAGGACACCTGCCCGAGCTCCACATCAGTCAGGATCACAGACAAC  
ATGTTCTGTGCTGGTTATAGACCGGAGGACGCCAAGCATGGTGACGCTGTGAGGGAGACAGTGGTGGACCATTCTGTG  
ATGAAGTACCCGGCAGAAAACCGCTGGTATCAGATGGGCATCGTGTGCTGGGGCGAGGGCTGCGACCCGGACGGAAAG  
TACGGCTTCTACACTCACCTGTTTCAGGATGAGCAGGTGGATGAGGAAAAGTTATTGAAAAGGCAGGAAAACGACGACTAA  
ACACAAGCATTTCTCACTTCTGTTGTTGATGCTAATAAAGTCTGTTCCCTTAACCACCAAAAAAAAAAAAAAAAAACCGA  
CCTACCCCTA

>Sequ20303EST2

GCGCTAACTGTGCAACTTCATCAGGTAAGTGGGGCGCTGTGCGGAGGGGAAGCGGTTTTCAATTTCAAACCCAAACAGT  
CCGAGGGACGAGCCAGTGCATTGTGGGATAACGTGTAACCAGATAGTTACAGCATTTAAGTTGAATTTGTAACGTTA  
TTTAAACACACACCAGAACGGTGTGCTACTACCGACTGGTTACAGTCCACAGGATCCGCGAAAAAAGTGCCTG  
TCGGCTCTCGCTCCAGTTTTTCCGCGCCTGGTTTTATTGGATGACAAACCGACGCTGGCTTGTGTTGTCAGGTTGCT  
GACCAATCCGGATTTTGTTCACATTAATAACTACCCTGTGTTTTAATTACACATATCTGACATAGCAAGCATTCT  
TCAAGAAACATGCCGAGGTCCAACAGGCAAAAAGGAATACAAACCTGGAGATCTTGTGTTTGTGTAATAAAGGGGTAC  
CCACACTGGCCTGCGAGGATTGATGAATTACCTGAAGGAGCAGTGAAGTCGCCCTCAAACAAATACCAGGTGTTCTTT  
TTTGGAACACATGAGACGGCATTCTGGGGGCAAGGATTTGTTCCCGTATGATGAATGTAAGGAGAAGTTTGGAAAA  
GCAACAAAAGGAAGGGCTTTGCTGAGGGACTCTGGGAGATCGAAAACAACCCACCGTCAACATGAAGGCTACGAG  
TCATCAAAGAAAAGCAATGCATCAGAAGGACCGGGGATACAGGTAGTTTCGGAGAAAGCAGATGCTGAGGGCAGTAGT  
GATGAGGATGAAGGGGCCCTGGTCACTCGACGAGAAGAACAGAGGGGAGGAACCAAACGAAAAGCAGAGGAGTCCACA  
GAGGCATCTCCCAAGCGGCCGAAGGATACAGGAGTGAAGGGGACTCTAAAGTAGAGAGCAACAAGTCTAACACAGAG  
GCCAAGCTCAACGATGTGGCTGGACCCAAGGCAACTGCTCCCTCCTCGCAGAGTGAAGTCAAAGCCAGAGGCCAGGAA  
AATGCTCCAGCAGGAGGCCAATTAACAGCAGATAAGCCTGTGACAGATAGTGTAAACATCAACTCAGAAGAAAACCA  
AGAACCTTTGACGCTTCTCTCTGGAATTTAGGCATCAACATGGTTACCTGCAGGATGCCAGATTTTACGCTGTTTCATT  
AATAGGAAGAAAACATAAAAAAAAAAAAAACCGACTACCCCT

>Sequ20309EST2

TTCCCTGCCTATGCCCTCGTGAGGTGGGCAGTGTAAAAATTTCCCTGTCTCTTTTCTCCACCAAGCGAATCCAAAACCA  
TCCGTCAAAATGTTGAACTTTACCGTAGACCAGATCCGTGCCATCATGGACAAAAAGGCCAACATCCGTAACATGTCT  
GTGATTTGCGCACGTCGACCATGGAAAGTCAACTCTGACAGACTCGCTGGTGTGCGAAGGCTGGCATCATTGCCCTCAGT  
CGTGTGGAGAGACCCGATTCACAGACACGCGCAAAGATGAACAGGAACGCTGCATTACCATCAAGTCCACTGCCATC  
TCCTTGTACTATGACTGGCTGGCTGAAAATGACTTGGCCTTCATTAAGCAGACCAAGGATGGAGCCGGCTTCTTGTATCAAC  
CTGATTGACTCACCAGGGCACGTTGACTTCTCCTCTGAAGTGACTGCTGCTCCTCGTGTGACTGATGGAGCCCTGGTT  
GTAGTGGACTGCGTGTCTGGTGTGTTGTGTGCAAACTGAGACAGTGTCCGTGAGGCCATTTGCGAGCGTATCAAGCCA  
GTCCTGATGATGAACAAGATGGACCGTGCCTTGTGGAGTTGCAGCTTGAACCTGAAGACCTTTACCAGACTTTCCAG  
CGCATTTGTTGAGACGGTCAATGTCATCATCTCCACTTATGGAGAAGATGAGCATGGACCTATGGGCAACATCATGGTT  
GATCCAGTCATTTGGTACTGTGCGCTTTGGCTCTGGACTCCATGGCTGGGCTTTACCCTGAAGCAGTTTGTGCTGAGATG  
TATGCTGCCAAGTTTCGACGTAAGGGTAACACCCAGATGACTCCAGTGCAGCCTGCAAGAAGGTGGAAGATATGATG

AGGAAACTGTGGGGTGACAGGTACTTTGATGCGGAAACTGGAAAGTTCAGCAAGAGTGCTAATGGACCCGATGGCAAA  
AAGTACCCCGTACCTTTGTTGCTCTTATCCTGGACCCCATCTTCAAGGTGTTTGTATGCCATCATGAACCTTCAAGAAG  
GAGGAAACTGCCAAACTGATCCAGAAACTGGAAATCAAGCTGGATACTGAGGACAAGGACAAGGAGGGTAAAGCCTCTC  
CTGAAGGCTGTCATGCGTGGCTGGCTGCCCGCTGGTGAAGCCCTTCTGCAATGATCACCATCCACCTGCCTTCCCC  
GTCACTGCCCAGAAGTACCCTGCGAGCTGCTCTATGAAGGACCTGGAGATGATGAGGCTGCCATGGGTATCAAGAAC  
TGTGACTCCAAGGCTCCCTTGTATGATGTACATCTCAAAGATGGTACCTACCAGTGACAAGGGTTCGCTTCTACGCCTTT  
GGCCGTGTGTTCTCTGGATCTGTCTCCACCGACTGAAAGTACGCATCATGGGACCAAACCTTTGTCCCTGGAAAGAAG  
GACGACCTCTACCTGAAGCCAATTCAGAGGACATTTTTGATGATGGGCCGTTACGTTGAGCCCCATTGAAGATGTGCCAT  
GCGGTAACATCGTGGGTCTGGTGGTGTGGACCAGTACCTTGTCAAGACCGGAACAATCACCACCTTTGAGCAGGCAC  
ACAACATGAAAGTCATGAAGTTCAGTGTGACCCCTGTCTGAGAGTTCGCTGTTGAGGCCAAAAACCCAGCTGACCTGC  
CCAAGCTGGTGGAGGATTGAAGCGTCTGTCCAAGTCCGATCCTATGGTGCAGTGTATCATTGAGGAGTCTGGAGAAC  
ATATCATTGCAGGAGCTGGAGAGCTGCATCTGGAGATCTGTCTGAAGGATCTGGAGGAGGACCATGCTTGCATTCCAC  
TCAAGAAATCTGAACCAGTGGTGTCTACAGAGAGACGGTCAAGTGAAGAATCAAATACCATGTGTCTGTCAAAGTAC  
CCAACAAGCACAACCGTCTGTTTCATGAGGGCCCGTCCCTTCAAGATGGCCTGGCAGAGGACATTGAGAAGGGTGTATG  
TTAGCGCTCGTCAGGAGCTCAAGGCCCGTGGCCGTTACCTTGTGACAAGTATGAGTGGGATGTCACTGAGGCCAGAA  
AGATCTGGTGCCTTGGCCCTGATGGAAATGGCCCCAACATGCTGGTGGACGTTACCAAGGAGTGCAGTACCTTAATG  
AGATCAAGGATAGCGTGTGGCAGGCTTCCAGTGGGCAGTCAAGGAGGGTGTCTCTGTGAAGAGAACATGCGTGCCA  
TTCGCTTCGACATCCATGATGTGACCCTGCACACAGATGCTATTACCCTGGTGGTGGTGCAGATTATCCCCACTGCC  
GCAGAGCTCTGTACGCTGTGAGCTGACAGCTGAGCCAGACTCATGGAGCTGTCTATCTGGTGGAGATCCAGTGCC  
CTGAAGTTGCAATGGGTGGAATCTATGGTGTGTTGACCAAGAGGGCTGGTCAAGTGTGTTGAGGAGTCCAGTGTGATGG  
GAACACCCATGCGTGTATCAAGGCCTACCTGCCTGTCTGGAGTCAATTTGGTTCACAGCTGACCTTCGCTCCAACA  
CTGGTGGCCAGGCTTCCACAGTGTGTGTTGACCACCTGGCAGATCCTTCCAGGAAACCAATGGACACCCACAAGCA  
AGCCTGGTGTAGTGTGTCATGGAGACACGCAAACTGAAGGGTCTCAAGGAAGGTATCCCAGCCTTGGACAACCTACCTGG  
ACAAATGTAAAAGCCTGAACCCATCTGGCTCATGCCTCATTCCTCGTTTCCATCAAATTTAAGTCTACATCATGGG  
ACCGACTGTACGAAACATAGGGAGCACTAATGTTTGCCAAAAGCATTGACAATAATGAATAAACATCTACAAAAATT  
GTAAACGATAATAAAA

>Sequ20310EST2

TCGAGAAAGAAGTGCAGACGGCGGATATGACGTGCACATCAGCAACGTGACGGAGGACATAGGCGTGCTCGGCATCG  
CGGGACCCAACTCGCGCAAAGTTCCTTCAGAAGCTGACGGAGGAGGATATGAGCGACGCCGTTTCAAGTTTCTCCACT  
GCAAGTCCATCAAGCTGGCCGGCATCCCCGTCCGCGCCATCAGGATCTCCTACACCGGCGAGCTCGGCTGGGAGCTGT  
ACCTCGACCAGAAGAACATGGCCGGCTGTACCAGGCCATGATGGAGGCAGGAAAAGACGAAGGCATCGACAACCTCG  
GCACCTAGCCATGTCTCCCTCAGACTGGAGAAAGGCTTTAGAGGCTGGGGAGCTGAGATGAACCTGTGACACGAATC  
CTCTGGAGGCTGGTGGATTATTTTCATCAAACCTGAACAAGCCGGCTGACTTCATTGGCAAAGCCGCTTCCAGCAGA  
TCAAAGCCAAAGGCTGAAGAGGAAGCTGTCTACATCAAGCTGGATACGGACGATATCGACCCCGAGGGCAACGAGA  
CCGCTCTGGCACAACGGCAAGGTGGTTCGGCAACACGACGTCCGGAGCCTACAGCTACAGCAGCCAGCAGAGCCTGGCGT  
TCGCCTACCTGCCATGGAGCTGTGCTCCGTGGGCCAGAAGGTGGAGGTGGAGCTGCTGGGGAGGAAATACGCCGCCA  
TGGTCTACCCAGGAGCCTTTAGTCTCACCAGCCAACCGGACCCGGCTGCGAGAAGAAAGCAAAGGCAAAGCATAAG  
CAGGACTTCTCCTCCATCAGTTTATCAGCAGCTAATGAAGACAACATCCACGGAATATGAATGAGAGGTAAGACTG  
TTATGGAAGAAATCATGTGCGAGCCATGTGCCAGGTTGTTGTGTCTGCGGCCACTTTAGGAAAAAAGAGGCTCGTT  
CACATCAGTCAACAATCTCTCTTCTCGTCTGAAAACAGACCCGGCATGTGAGAACGCTCAGTGTCTTACGACTGTGT  
TTTTGAGAAATAATAACCGTATGTGGTGTATTTGCACCACAGTGTCTGTAAGTGTGAAAGAGTAATTTACATTTTT  
TGTGTAATTCATGAATGGATGTTAACGGTTTATGGGTCAATACAATACTTGAACATTTTCAAACAAAAGGGTCAAAT  
GAAAAATACAGCTTTTTGTGTTTTATTTGAGAGTCAAGAGATGATGTGCGTGCATTTTACACAGTCTCATCAGCTGTT  
ATAAACACCAACAACCGAAAGAAACAGAATGTTTGCAAACCTTGTACAAAGATGTTTTTTAAAATCTGTTTTTTTTT  
TTTACTAATATGTAATTAATTAGGTGTACATTTGTATACCTTGTATAAATTAAGCAATAGC

>Sequ20323EST2

TGCCATCGCTCTGACCTGTGGCAACGTCTGCCTCTGGAAAGGAGCTCCAACCACACCTCTCACGAGTGTGTCAGTTAC  
CAAGATTGTGGCTGAAGTGTGGAGCAGAAACAACCTGCCCGGCCAATCTGCCCATGACCTGCGGAGGCGCTGATAT  
CGGCACCCCATGGCGAAGGATGAGCGCGTGGATCTGTCTGTTACTGGGACGACCCATGTTGGCAAGATGGTGG  
CCATGATGGTGCAGGAAAGGTTCCGTCGCAAACTGTGGAGCTCGCGGAAACAATGCTATCTGTGTTTTGAGGACG  
CTGACCTAAATCTTGTGGTGCCTCTGCTGTCTTCGCATCCGTGGGAACCGCTGGCCAGCGCTGCACCACAACCAGGA  
GGCTGATGCTGCATGAGAGCGTTCACGACACAGTGGTTCGAGAGGATCACCAAAGCCTACAAACAAGTCCGCATCGGAG  
ACCCCTGGGATCCAGCACCCCTGTATGGGCCTCTGCACACCAACAAGCGGTGGATCAGTACCTGGCAGCTATTGAGC  
AGGCCAAGAAACAGGGCGGCACTCTGGTCTGTGGAGGAAAGGTGATGGACCGTCTTGGAAACTACGTGGAGCCCACCA  
TCATCAGGGCTGGCTCAGCAGCTCCCATCGTGCACATAACAGAAACCTTCGTCCCCATCCTCTATGTCTCAAGTTCA  
AAACAGAAGAGGACGCATTTGCGTGGAAACAACGAGGTCAAGCAGGGTCTGTCCAGCAGCATCTCAOCAAAGATATGG  
GCCGGTTTTTCCGCTGGCTGGGACCCAAAGGATCCGACTGCGGCATCGTGAATGTCAACATTCCTACCAGCGGAGCTG  
AGATCAGAGGAGCCTTTGGTGGGGAGAAACACACTGGAGGTGGAAGAGAGTCTGGCAGTACTCGTGGAAAGCAGTATA  
TGAGGCGTTCAACGTGCACAATAAATACAGCAAGGATCTTCCCTTGGCCAGGGAATCAAGTTCGAGTGAAGCCTTG  
AAGTAGTTTTAATTAAGCTTCGATGAGCCCCAAAAGGACAACACTACATGTTTTCAAGTGTGCTTAATAATGCAAGACA  
TTTTTTTTGCATTTTTGAATTCAGAAAGGTCAGTTTTAATTTGAACAGAATTTGAAACTTTTTGGATGGGTCTCATT  
GTCATGCATCAAATCTATGTATGTGGTGTGGCTTTAGATACTAATCCTGGATTTGAAGTTGCAAATGTTTTTATGT  
TTAAGGTCAAATACTGTTTCTCAAAGGTTGGGGTGCATTTTTCTACAAGCACTTAGAAACTGGGTTTGGAGCTAGA  
TGACTGTAGCAGATACTTTATACGGTATAAAAAATAAAAAAAGTGATGTTGACATTATCAACATGTCAAATTAGAATA  
TGACGGTCAAATAAGGTGCAGATTTGCATTTGTTTTGATGGTTGATTTTTATAAACAGAAAGACACATGAGAATGCGA  
GATACAGTATTTCTGACATGGTAAATAGCATTTTCATCACAGACTGCTTGAAGGAGTAAAGTGTAAAACACTGTTG  
TTTTGCATCTTACAGCATTAATATACTGTGCTTTGCATCTAAAGCGCCCTTAAAGAAATGGTCAAAATGTGCTTTTTCA  
GACTAACCAAAATAAAAGCTTCTTGTGATACGTAATAAAAAAACGAAAACCTCCCTACTA





CTGCTGCCACCGTACGCCACTATCCGCCGCCCGGAGGCTGGAGCTGGAGAATCACCCCTCAGTGTGCTTGTGAGCGCGG  
TGCTGTCTGCTACTTCCCTGACGGAGCGGCTGAACCTGCATGGGAAGCTCGGCTGCATGCTCAGCATCCTGGGGCTCC  
ACCACAATGGTGATTCACGCACCCGCAAGAGGAAGAGATCAGCAGCCTCGACCACATGGCCAGGAAGCTGGTCGACCCA  
GGGTTTTTCATCTTTGCCACTCTCGTCATCATCTGGGCCATCATCTTCATATTTGTTGTGGGTCCCGTACCGTCCAG  
ACCAACATCCTCGTGTACATCACCATCTGCTCGGTAATCGGGGCGCTGTCGGTGTCTTGCCTCAAAGGACTTGGCATC  
GCCATAAAGGAAGCGATCTCTGGGAAGAATGTTGTGAGGAACCCGCTGGCATGGTTCCTGCTTCTGGGTCTGGTGGCC  
TGTGTGAGCACACAGATCAACTACTTGAACAAGGCTCTGGACATATTC AACACCTCCCTGGTACTCCCATCTATTAC  
GTGTTCTTACCACGCTGTGTGCTCACCTGCTCCGCCATCCTCTTCAAGGAGTGGGAGCACATGGGCACCGACGACGTG  
ATCGGCACCCCTCAGTGGCTTCCTCACAATCATCGTGGGCATCTTCCCTGCTCCACGCCTCAAAGACATCAGCGTGAGC  
TTGGCTACTCTCGCCGTGCCATGAGGAAGGAAGAACGGGCGTTCCTGCAGCCAATGGCATGACTTCCACAGCACG  
TACGAACTGCTGCACAACGAGTCCACTGGGGACGTGGAGGACAGAGAAAATGGGTTTGCCTTTTGGACAGCATCTCCAGA  
AGGAACGGGGCAATGACTTCCTCATTGGATCATTAAGGAAGTTTTTTTTCTTTTTTCCCAGCCCCGACTGACTGAC  
CAATCGTGGCATTGTTGTGTAAGAACAAGACAATCAGCTGTATGGGGAGAAGTACTTGGACAGACCAGTGGATTGTA  
TTAATGCTTTAATTTGCCTTACTTTTTACTCAGAATATGACCTGCTCATATTCAGTTACAGTTAAAACCTAATTTTCT  
TCCTCTGTAGCGCTGTAATAATGAGTTTTTTAAAAGAAATGTTTTGTTATATGTACATGCATATTCATGTAATGAATT  
ACTTTCTATAAAATCAGAAGGTTTTAATATATCTTCTATATGAGGTCCTGCTGACGATGACTGCGGTAAAGAGGACGTT  
CACTATGATTTGAGTTTTCGTGATACTTGAAGGTAACAACAGTTTTTTGTTGGGAGTCATTCTGAACTTTTTTTTTGTAG  
TGTTTACATGAAAAGCTCTCGAGACGAACCAACAGATTTGTTACATATTTATGAAATAAAATGATTAACATTTTGA  
AACACAAGGCACAAATGAATAAATGCTTAACATGAGTATGAGTTACTTTTTCAATTTCCCTTTTTAAACTGTTTAGCATGC  
ATGTTCAACAGTATAGAAAAATACAAATTTACTTTTACCCCCACTTAAAAATAGGTAACCTGCTCACCCCTAATAATCCAC  
CACTGCAAAACCCCTAAAATATTTACCTGATAAAAATAATTTCCCTCTATAGCTTCTGCAAGTATAAAAACAAAGGATAG  
TTCATGCCATAAAAAGGGGAAATATCTATCATTTTCTGATAAGGCACAAGTGAATACAAAAAAAAGTGGCCCAACTTCC  
TTACATTTAACGGTCTTCCGCTACTGAAGACCTAAAGTAAATAAGGAGGAATATTTCTAGCTGGTCTGGTAATGGTGGC  
AGTGTGTTGGTACTTCATGCTGGTGCAGGGTTTTAGCTGCTGGCCAGCGACTGGTGTATCGGTGGTTGGAAGCATCGGA  
CGTGTTCACCGGATGTTCTCTCCGCTCTCCGACTTCATGTACTTGTTCAGGATGGCAAAGATCTCGTTGTTGAGGA  
CTTGGAACTTGCGGATTTCTGTCAACCATTTTTCTTCACTGGCACACTCTTGATGACCTCGTCTTTGCCGTCGTGTTTCT  
GCACCTTCAGGAGGTGGTAGCTGAAGTCGAGGATGTCGAAGCGTCTCTGCTGTCCAGCAGGGCAGTATCATGTCAGC  
CCGCCAGTGGAGCCGCTCTCCGAAGCACTGCTCTACTGTGAACCTCGTGGGCTCCACAGGGA TGCAGTACACAAACT  
GCATGGCACTCCAGAGACGGTGGAACTCCACACACTCGTCCACGTGCATCACACCGTTGCTGGGCAGCGGCCCGCGCC  
AGATGGGGTCACTAGGAACCCCTCGCACGCGCTGAGGATGACTTCGAACATGGACAAACCACAGCACAGCCTCTCTT  
TGGTGAGAAGGTCGCCCTCGCGAGCGATGGCTATTTGCTGTGGGGTGCCGAGTGCCTCTATCAGTGAACCATATGCA  
GTGCTGTGATTTGGCTTCTAAGCGCTTCATCTTGGCGTCCAGACGTTCCCCCTCTTTGACATGGACTCTGGGAAGAA  
TGTTTTGAAAAGGTGCAG

>Sequ20393EST2

GAGAGTTCGGATGTCTTTCAGTGACTTCCCTGCGTCACTACTCCCGGATCGAGGTGTGCACTCTGACGCCCCGACACCA  
TCGGTGACGACTCCGTCAAACACTGGAGCGTCAGCAAGTTTTGACGGCACCTGGAGGAAGGGCTCGACGGCTGGGGGCT  
GCAGGAACACCCCTACACGTTCTGGATGAACCTCAGTTCTGTAATCCGGCTGGAGGAGGAGGACGACGACCCCGATG  
ACGGCGAGGTGGGCTGCAGCTCGTTGTCGGTCTGATCCAGAAGAACCCGAGGAAGCTGCGAAAACAAGGCGAGGACA  
TGCACACCATTTGGGTTCCGCATCTACGAGGTTCCACAACAGTTCCACGGGACGCGGGAAGTGCACCTGGACAAGAACT  
ACTTCTGACACACGCTCAGACGGCGAAGTCAGAAACCTTCATCAACCTGCGCGAGGTGAGTTCCCGCTTCAAGCTCC  
CTCCTGGAGAATACCTGATCGTCCCCTCCACCTTCGAGCCGCACATGAACGGGACTTCTGTATCCGGGTGTTCTCCG  
AGAAGCAGACAGACCCCAACCCCTGTGATGACCCGGTCCACGCTGACCTGGAGGACGAGACGGTGTCTGACGAGGAGG  
TGGACGCAGGGTTCCGAGGCTCTTACCAAACCTGGCCGGAGACGACATGGAGATCTCTGCGGCGGAACCTCAGGACCA  
TCATGAACAAGATCGTGGCCAAACGAACATGACATCAAGACGGGACGGCTCAGCATGGACACCTGCAGGATCATGGTCA  
ACCTGATGGACGACAGCGGGAACGGGAAGCTGGGCTCGGAGAGTTCGCCACGCTGTGGAAGAAGGTTTCAGAGATACC  
TGTCCATCTACAAGAAGAATGACTCTGATGACTCGGGCACCATGAGCACGCCAGAGATGAGAGTGGCCTTCAAAGACG  
CAGGTTTTACCCTCAACAACACCATCTACCAGCAGCTGGTGACTCGATACTCCGACCCGACATGACCGTCTGACTTCG  
ACAACCTCGTGGGTGTCTGATGAGACTGGAGATGATGTTCAAGATCTTTAAGAAGCTCGACGCTCACGAAAGCGGCT  
CCATTGAGCTCAACTCAATCAGTGGTTAAACTTCGCCATGATCTGAGCCGTGACTCCTTGTTCGCCTGGAGCCTCAG  
TGTTAAAGCAGCAAGCCATATTCCTGTTTACAGCCCGCTTCTTTTAGACTCCTAATGTTTTATATGTGAGGCTTGT  
GTTTTATTATCTATACACTACCTGACTTACAGTCGATGTAAGACAATAAATTTATAACCAAAAAAAAAAAAAAAAAAA  
AACTAAACGTAGAACG

>Sequ20398EST2

CCTCTCTGCCACTATCCGTGCGCCAGGCTGCTGCAGCGCTCAACCTGCCCGGAATACAACACCAGAAATCAGCCATGT  
CTGACAAACTCCCCTCAAAGTTGCTGACATCACCCCTGGCCGAGTGGGGCGTAAGGCCATTGATATCGCAGAGAATG  
AGATGCCCGGTCTGATGAAGATGAGGGAGATGTACAGTCAGTCCAAGCCTTGAAGGGCGCCCGCATCGCCGGCTGCC  
TCCACATGACCCCTGCAGACCGCGTGTCTATCGAGACCCTCATCGCCCTCGGAGCTGAGGTTAGTGGTCCAGCTGTA  
ACATCTTCTCCACTCAGGATCACGCTGCTGCCGCCATCGCCAAGGCTGGTATTCAGTGTACGCGTGGAAAGGAGAGA  
CAGATGAGGAGTACTGTGGTGCATCGAACAGACTGTGTACTTCAAAGACGGTCAAGCCCTCAACATGATCCTGGACG  
ACGGAGGAGACCTCACCAACCTGGTCCACAAGAAGTACCCCAACTGCTGGCAGGTATCCGTGGAGTGTCTGAGGAAA  
CGACCACAGGTGTCCACAACCTGTACAAGATGATGAAGAAGGGCGATCTGAAGATCCCCGCCATCAATGTCAACGACT  
CTGTCAACCAAGATAAGTTTGAACAACCTGTACGGCTCGAGGAGAGTCTGATCGACGGCATCAAGCGCGCCACCGACG  
TCATGATCGCCGGGAAAAGTTCGCCGTGGTGGCGGGTTACGGTGACGTGGGCAAAGGCTGCGTCCAGGCTCTGCGCGGGT  
TCGGAGCTCGCGTCACTGTCACCGAGATCGACCCCATCAACGCCCTGCAGGCCGCATGGAGGGTTATGAGGTCACCA  
CCATGGACGAGGCTGTAAAGAGGGGAAACATCTTCTGTCACCACCACCGGCTGCGAGGACATCATCTGGGACAACACT  
TTGAGAACATGAAGGACGACGCCATCGTCTGTAACATCGACACTTCGACTGCGAGATCGACATGAGCTGGCTCACCA  
AGAATGCTCGGGAGAAGGTCAACATCAAGCCTCAGGTTGATCGTTACCCTGCTGAAGAGCGGGCGTACATCATCTGCTC  
TGGCTGAGGGCAGACTGGTGAACCTGGGCTGTGCCATGGACACCCGCTCTCGTCAAGGACACTCCTTACCAATC

AGGTGCTGGCTCAGATCGAGTTGTGGGTGAACACCTCCAAATACCCCGTGGGAGTTTACTTCTGCCCAAGAAGCTGG  
ACGAGCAGGTGGCCGCCACCTGGACAACTGGGGGTGAAGCTGACCAAGCTGACAGACAAGCAGGCCAAGTACC  
TGGGTCTGCCAACGAGGGGCCCTTCAAACCGGACCCTACCGCTACTGAGCCCCCCCCCCCCGAGCCCTGTCTGG  
GGAGAGGAGAAGAGGAGGAGGTGGCTGGACAGGTGGTGGTGGATGATGGGAGCTCTGGGACAGTTTC  
TCCAGGTTTCACTCTGGGAGCCAAATATCAAGTTTTTCAGGGACAGAAACAGTTTGATTTTCTCTCTTAAAAAACAAA  
AACTTTTCAAACGCCGTGTCTGCTTTTACTGATCCTCCATAGAGCTGCTGAGTAGAAACAGGAAGTAGACACAAAGC  
TTCATCAGTAGTGTGATGTGGGAGTGTAAAGTGTCAATAAGTCAACATCAGCCGAAAGTTTAGTTTTGTCTCA  
TCATGTTATTTCCCTCCGACACCTTCATCCCTCGTCCGTCTCTCTCTTCCCTCATCAGCTCTCTGAAACACCGTCAG  
TGGCCGTGAGAGACTCTTCTCTTGTTCATGTCAATCCCTCTTTAATGGAAAAATAAACCTCTTCTATCCGACCTCC  
ATCTCGCAGCGTCTCCAGGAGAGAAGTTTTTCGAGGCAGACGGTTTTAGTGTACAGTGGCCTTATCCATAAACACTGCC  
TGTGTTAGCACTTAACTCAAACGTGACGTGAACTGAAGACGAGCGCCGTGCCAAAGGAACCTCCAACGCTCCTCTG  
TTTCTGCCTGAGTCTTATCTGTTGCCTCATTTCCTCTTTATTGTGATTTTTATTTAATTTGACTTAAAGGGCCAA  
AACATGTGCAACAGCCCC

>Sequ20407EST2

AGTCATCGTTGACTAGCTGATAGTAGCGAACGACAGACTCCGTCTACACAAGAAAACCTCAGTTTTGCGTGTGTTTT  
GTATACTTTTGTAGTGAATAATGCCGTGGAGAATTTGGAGGAGGAGGTCTGCCCAAGAACCCCGACCTGAGGATAGCA  
CAGTTGAAGTTCCTGCTGACGATGGACGGTCACCGACAGGATGCTAAAGTGAAGACTGAGCTCATGGACGCTATCAAA  
GCTAACAAATATGGCCCTTATTATGAGGGTCTGTGTAAGACCTGAAGTGGCAGCTTGACGGTGACCTGCTGAGTAAA  
ATGAAGAAGGCCAACGAGGAAGAGCTGAAGCGTCTGGACGATGTGTTGGAGGATGCGGAGAAGAACCTGGGAGAGAT  
GAGATACGAGACGCCATGATGGCCAAAGCTGAATACCTGATCAGAATTGGAGACAAGGAGGGCGCCCTAACAGCCTTC  
AGGAAGACCTATGACAAGACGGTCCGTCTGGGTACAGGCTAGACATTGTCTTCTACCTGCTGAGGATCGGCCCTCTC  
TACATGGATAGCGACCTCATCACACGCAACTCGGAGAAAGCCAAGAGCCTTATTGAGGAGGGGGGAGACTGGGACAGG  
AGGAATCGCCTGAAGTCTACCAGGGCCTGTACTGTGTTGCCATCAGAGATTTCAAGCAAGCTGCTGAGCTCTTCTT  
GACACAGTCTCCACCTTCACCTCCTATGAGCTCATGGACTACAAGACCTTTGTTACCTACACTGTCTACGTCTGCATG  
ATCGCCCTCAAAGGCCGTGACCTCCGTGAAAAGGTAATAAAGGGTGCAGAGATCTTGGAGGTGCTGCACAGTCTGCCT  
GCTGTTCCGACGATCTTTTCTCACTCTACGAGTGGCGTACTCTGTCTTCTTCCAGTCTTTGGCCATGGTGGAGCAG  
GAGATGAAGAAAAGACTGGCTCTTTGCGCCACACTACCGCTATTATGTGAGGAGATGAGGATCCAGGCCTACAGCCAG  
CTGCTAGAGTCTTCCCTCACCTGGGCTACATGGCTGAGGCCCTTGGTGTGAGCACAGAGTTCATTGACCAG  
GAACTGTCCGATTCATAGCTGCTGGCCGTCTCCACTGCAAAATGATAAAGTGAATGAGATTGTGGAAACCAATAGA  
CCTGATAGCAAAACTGGCAGTACCAGGAAACCATCAAGAAGGGCGACCTGCTGCTCAACAGAGTCCAGAAGTTGTGCG  
AGAGTTATCAATATGTAACAGCGCCATATTCTCTCATTACAGCAGGGGGGGATTAATCTTGGTATACCCACACCTGT  
AGTTTGTCTGGCAAAGTGAATCTTATATTGTGTATATAATAAAATTTGTTAACTAGTAACGAAAAAAAAAAAAAAC  
GAACTACCCTAA

>Sequ20451SNP2

TTCTATACTGAATTTAAATGAAACAATAAAAAAACACATGTTGAAAAACAGCTCAAGAGAGACATTCAAAAGGAAGAA  
CATTAAACAATATTGGTGAGATAGGAAAAAGTGAGAGATTTGTGTCTCGTTTTGCTTTTGTGTTGGTTTTAGTTATTTT  
TGCTGGTTTTTCAGGAGGCTATTCTGAAACTGTAACAGCAGAGCAGGGTTTTGTGTTTTTACAAAAGACACAGGACA  
CCAACCAAGGCTTT

>Sequ20473EST2

TCTGTGCGCTTCTGAGCCAAGAGGAGATCTACACTTTTCCACCAGCCTTCTGAGGACCAAGACCAGCCAAGATGATGC  
AGTGTTTTCACTTCATGGTGGAGCCGGCCAAAAACTTCCAGGCCAAGATAAAGGAATCACACAAGAGAGCAAAGAAGG  
ACAAGAGGGAGCCTCTGGATGAGGATCAGCTGTTTTGTGGTGGATCTGGCTAGGGACCTCAGCCGAGTGTGTGAGAGGT  
CAGCAGTCCCTGGAGCACATCTGGAACCAGGATGACACCTGGCCAACCTCTCTGCAAGCTTTTTCATCCAGTGGG  
CCTCTATGCTGGAGAGCAAGAGGAGGCCTCTGCAGACTGATGGCTGGCCAGAGATGGATGAGGGCAAACCTGCCAGATC  
TGATTAATGAGCAGGACCTGATGCAGGCCAAAAATGTGATTTCTCAACTGGATCAAGGATGTGAGAGCTCAGCCTGAGC  
AAAGTGTATGGCTGGGGAACCTGTGGCAAAGGTTCTGGAGGACCTGCAGTCAAGCTGGCGTTGGGGCCGTGCACCCA  
ATCTGCTGACTGCAATGGAGCTGGTCATAGTGGACTTTAATGCTGCAGCGCCCCAGATAAGGACACCCATCCCGGCAG  
CAGTGGCTCATGTGGAAGCAGAGGACTCAGAATATTGGTGCCATATCCCTACGTTCTCAACAGACTGTGGGACTGGATC  
TCAGATGCCGCTGAGGTGACTCTGGATCTGGATCTGGACACAGCCAAACCCAGATCTGCTCATCTCCAGTGACGAGAAG  
ATGCGCTGTGGCTTTGAGAGGAAGGATGTTCCCAACTACCACCAACGCTTCGACGGCTGGTGGTGTGCTGTGCGGGGTG  
GAGGGCTTCGGCTCTGGCCGCCACTACTGGGAGGTGGAGGTCGGTGGAGCGGACTGGCGGCTGGGCGTGGCTAAAGAG  
TCGGCCCTGAGGAAAGGCTTCAAGTCCGCTGAACACCAATACAGGGTACCTGACCCTGCGGCTGGAGAGGGGCACTGAG  
CTGAAGGCGCTGACTGTGCCCTTCACTGCCCTGCCGCTGGTCTCATCCCCCGCAAAGTGGGCATCTATCTCGACTAC  
GACCAGGCCAGCTGTCTTCTATGACGTCGACAACACTTGCACATTTACCTTACAATGAGAGCTTCACTGAGAAG  
CTGTTCCCTTGTGTTGGTACAGTGGAGATTTATCAAGGATCTGGTGTATCAAGTCCCCAGCAGCTAAGACCCAAATGTCTC  
TGCTCCACATCTGCTCTGGGGTTGAGCTTCTTCTGTCCCTCTTCCCTTCCAAATCCAGTAGACATCATGTTAAAGT  
ATAATAAACAGGTTATGTAATACTGTAATCAGAATCAGAGATCCTGATGTAAGAACCATCAATAGCTCCAGTATGT  
GACCAGCTCTATGCTGCTACTGCTTCACTGTGATTGTTGCTGCCACTTTCTCTTATAGAGTTATCATGTTGCCCGC  
GTAGAAGGAGTCTGTTGCGCTACAGTCCGTCCATAAAACAGGTCGGACCTCTCAGAATAAGACAATATACTACACAG  
TTCAATGGCCCTCTGTCAACAACACTGAACCCATGTTACCATGTTATCATGTTTCCCTTTGCTCACATAACATAATGTAT  
TTTCATACATTTAAACAAAGCCTATAGCATTAAATGACTGTATTGTGCAATATTAATCCTGCAGTAAGAATGCACTC  
TGTGAATAATAAATAAAGCAAATGTGTAGGAACAAAAAACCAGAACCTCCCTA

>Sequ20479EST2

GTACAATTCAGTCGCAGAAATAGGCTCGGTGATTTTTCGGGTCAGGTCGGAGGGTTCTTGGAGGACAGTTAATCATGGC  
CCTAAGGGTGATCCGGCTGGTTCATCCCGTCCGGAGCAAATGCTTTCAAATCGGTGAATGCTGTGCAGAAGGCAGGTGT  
TCACACAAGCTCAGTGAGAAGCCTGCGGTATGGCTGGTGGCCATGCACCTGGGCGAAAGGACGACACCACGGTTAAC

GCAGAACAGCAAAATCATCTCTGTGGATGGAACTTGGCCTCAGGGAAAGGAGCACTGGCCCAGAAGCTGGCTGACAA  
GCTGGGGATGCTTACATGCCTGAGCCTGACACCTTCTACTTGGACAAGATGTGCGGAGAGAAGCAGCCGCTCTCTGT  
CGACTTCAATGGGATGTGCAGCCTGGAGAAGTTCTACGTCGACCCCAAAGCTGCTGATGGAAACAGCTACAGGCTGCA  
GCTGTGGATGTACACCATGAGGCTGCTTTCAGTACGCTGACGCCATCGAACACCTGCTCACCACAGGCCAGGGAGTGAT  
CCTGGAGCGTTCCCCATTCAGTGACATGGTCTTCTGGAGGCCATGTCCAAAGAAGGCTACATCAGGAAAGATTGTGT  
GCAGCACTACTATGAGGTGAAGAACATTAGCGTCTGTGAGTTTCTGCCTCCACACCTTGTCTATGTAGACCTGCC  
AGCCGAGGAGGTGCAGAAGAAGCTGAAACAGAGCAGCAAGTCCATCTCAGAATGTGCCCTGACATATTTGAAGAG  
CATCGAGGAGGGATACAAGAAGTCTTTTCTGCCAAAATCAGTGAAGTGTGAGAGGTGCTCGCTTACGATGCAACCCA  
ACCCCAAGACGTTGAAAGGGTGGCTGAAGACATTGAGTATTTGAAGTTGAAAAGGGGCGCTGGTTGGAGCAGGATGA  
CGTCACCTACCACCACATGAGGATGCTCGTGGAAGACAAACAGCAGGTGGCAACCCTGACCCACATACCTAGATTCCCT  
GCCGGAGATCACCATCGGGGCTCACGACTATGATGAAAAATACTACGCCCTATAAATCACTGCCTGGGAAGAAGTACGC  
CCCCGGTTATAATGCAGATGTTGGAGACAAATACATCTGGCTGAAGTGAGCGATTTTCATCGGCCCTCAACAAATTCA  
ACCCTCGTCACTGGCTGATCGGCTCCCTGGGTGAATCTGGACCCTCGTCCATTATTGATCCGGTTGTCTTCTGTTGT  
ATATCCCAAATAATATGTATGTAATAAAAATAAATTTTGAATCTATTAACGAAAAAAAAAAAAAAAAAACCACCTACC  
T

>Sequ20506EST2

CCGCTCTCTTGGCCAGACGAAGTGCACAGTGGTGTATTGTGCGGTACCGTTTTTAATTCTCACAAACACCTTCCCGAA  
AAAACCCGCAAACATGACCAGGAAATTTCTTCGTGCGGTGGAACCTGGAAGATGAACGGCGACAAGAAAAGCCTTGGGGA  
GCTCATCCATACCATGAACGGAGCCAAGGTGGACCCCAATGTGAGGTGGTGTGCGGGCGCTCCAGCAATCTACCTGGA  
CTTTGTGTCAGGTCCAAGCTGGATGCCAAGTTCGGTGTGGCTGCTCAGAAGTGTACAAAAGTTGCCAAGGGTGCCTTAC  
TGGGAGATCAGCCCTGCGATGATCAAAGACTGTGGTGTGCACCTGGGTGATCCTGGGCCACTCTGAGAGGCCCATGCT  
CTTCGGAGAGAGCGATGAGCTCATTGGCCAGAAGACAGCCACGCTCTGGAGAATGGTCTCGGTGTGATCGCCTGCAT  
CGGCGAGAAGCTGGACGAGAGAGAGGGCGGCATCACAGAGAAGGTGCTCTTTGCTCAGACCAAGGTGATCGCAGACAA  
TGTAAGGACTGGAGCAAGGTGCTGCTTGCTTATGAGCCTGTGTGGGCCATTGGCACCCGGCAAGACTGCCTCCCCACA  
GCAGGCTCAGGAGGTTTCATGATAAACTGAGGGGATGGCTGAAGACCCATGTATCTGAGGCTGTTGCCAGTTCTGTGAG  
GATCATCTACGGAGGTTCTGTGACCGGTGGTACCTGCAAAGAAGTTCCTCCAGAAGGACGTTGACGGTTTTCTCTGT  
TGGTGGAGCCTCCCTCAAGCCAGAGATTATCGAGATCATCAACGCCAAGGCA

>Sequ20524SNP2

ACTGGACCTACAGCAGAACAGACAAGTGAAGTACTCTGCTGTAGTCTGAGCTGAAGGAGTGAAGCTTGCAAGAAAAT  
CATGGCTGCAAGGTATGCATTTTTTATTTTTGACCCTTACATTAATCTGAAAAATGAATTTACTCCCTGTACACAAGTTC  
AATTTAGCCACATTTTTGCAGTTTTGTAACCTGTCTGTTGT

>Sequ20554SNP2

GGGAGTAAGTATGGCCAAAGAGAAGAACATGGCGGTCCCACAGTTACTCAGTAACGCCGAGTTAGTAAAACAAGGAGC  
TGAAGCTCGGGTTTACCAGGACAGAGTTTCTGGGAAAACCGACTATAGTGAAGGAACGGTTTCCGAAAACGGTACAGACA  
CCCAGTGTGGATCAAAAAGTTGACTCACCGGAGGACGGTGCAGGAGGTGCGATCCATACTGCGCTGTGCGAGGGCAGG  
CATATCTACCCCTGTAGTCTACTTTGTGGACTACATCTCCCACTGATTTTTCTTGGAGGAAGTGGTGGGTTCTTTGAG  
TGTGTGTGACCCACATCGCTCCATGCAGCAGTCTGAATCCTGTGAGGACCCAGGAGCTGGAGTGGCTGGCTCAGAGGGT  
GGGCCAGATCCTGGCCAAAATGCACGATGAGGACGTGATCCACGGAGACCTGACCACCTCCAACATGCTGTTGAGACG  
TGGCCCGGAGGACCCAGAGTCCAACCTGGTCCCTCATTGACTTTGGCTTGAGTTACATCTCTGCTCTGCCAGAGGATAA  
GGGGGTTGACTTGTATGTGTTGGAGAAGGCATTCCTCAGTACTCACCCCAACACAGAGGCACTGTTTGGAGAAGCTGCT  
GAAGAGCTACACAGCGTTCATCCAAGAAGTCTGTCAGCAGTCAATCAAAAAGCTGGATGAGGTTCCGGCTGAGAGGTAGAAA  
GAGTCCATGGTGGATGAAGATCCGAGCTGTGCTCAGGGCAGGCTCTGTGGAGAAAACATCCAAAACATGTTGG  
ATTTCTAACAGACTGTTGTAAGGGAAGTAAATAAAAAGTGTCTTGTAGTGAATGGACAGAAGTTTTCTTCTTATTG  
TAATGATGTTGGAACATCTCAGAGCAGGTTATTTGCTGACAGGTGATGAAATGTCAACAAGACAGACTTACAGATAATG  
TGTTAATGTACAAAAGATCTATGGTTACACGTACTCATGCCTGTGGCCTAGATATCTGTGCCAACTTCAGTTCTCAAGT  
AAGAGCTAACTGACTGACAAGTGTTCCTTCAAACCTTGTAAATGTAAGAGACAGCACAGATCAGACTACAGGCAGGA  
GTTCACTGACCATCAGCTGTTACACACTGACTTTAATGGGATGTCTCTCACTGCACAGTCACTGGATGTATTACTT  
TTCTTAATAATAAAAATGATATT

>Sequ20598SNP2

GGAAGAAGGACACACATCAGTGGATTGCCCTGAATACACTAAATGAACCGATCGAGGATGTGAAGTATGCAGTCAAAG  
ATATCACTGAGGGAACAGACTACGAGTTTCCAGGGTTTTAGCAATCAATGAGTCTGGATCTGGAGATCCGAGCCCTCCA  
TCTGCAATGGTGTGTGCAAGAATCCCAACATGAGACCTCATTTTAAAGACCCAGAGGACTTCATTGTTGTGTCAGAGCA  
GAAATTTGCTCGCTCAAATTTGCTATGAGGCTGAACCTCCACCTCAGATCACCTGGCTGAAAGACGATGAGCCA  
ATATCTCCGTGGTTAATATCGTCAATACAGAGGGAATGTCTCAGCTTGTATTCCTCATCAAAGCGGTCAGATTCA  
GGCATCTACATATCAAAGCCAAAAACTCTGTGGGTGAGGCTTCATTTGACATGAGGTTAGAGTACAGACGAACC  
AAGACTCCAGGGCCAGTGGAGTTGGAGCAAACAGTCTATGGCAAAGTGGTGGTATCATGGGCTCCCTCTCCAGACGAG  
GAGCTCGATGACCGCTGTACTATATGGTGTCTCAACGCGACTCCAACACCAGAGTGTGGAAGACTGTAGCAGACCGC  
CTCTTCACTCACACATACAGTCAACAACATCTTCTGGGATAGAGTATCATTTCCGGATCTACGCCAAGAACGAC  
ATGGGCCCCCTCAGATCCATCTCAGTCACTTACAGGGCCCAATAGCAACAGAGTCAAAATAGCTTCAAATGGAGCT  
AATTCGGCGGATGCTGCTTTGAGAGGCTCCATCCATCTTGGTCCCTCTGAAAGTCCACACACCACCTAAAGGTTAC  
CAACTTTTTCATGACATGCGCTGTCCGAGGATGCCCTACGCCAGTGTTCCTGGTACCTGAACGACGTCTGCATCAAC  
TCAGACAACAACACTACTACATACCAACTCATTGGTGTGTGCTCCATGTATATCCTCAGAGTCCGACCAATCGACGGC  
GGTGAATATAAGTGTGTCGAGTCAACTCTTTCCGCAAAGCTGAGTGTCCACTAACTTACTGTTAGAGATTAATAA  
GGCCTGAAGGTTTCATGCAAGTCTTCTTACTGAGATATCGTGAAAGTAAGGAAGTAGAATGTTTTAGTTGACAG  
CAAAGACTGCATTGAAATGGTGTATATTGTTATGCAATAGTGAAGATAAAATCATATAAAAATAGTCTAAATACTAG  
CTTATTTAATTTATTTGAAATGCTACTCATTTATGATTGTTACCCTGTCTCATATAAATAACTGTTTTGACAAAGATGTG

TCAAAATGTTTAAGCTCTTAACTGCAATAAATCAACAAAAGACAAAAAAAAAAAAAAAAACCGACCTACCCTAT

>Sequ20655SNP2

GATCGCTGCAACACAAATGCAATAACCATGAATACCTTTACAGTGAAAGGCATGAAGTCATTGGCCATGTACTGGGTG  
AGAGTAATTGCTACTAATGATGGAGGAGAGGGAGAGCCGAGGAGCTGGATAATTACATCCTCGCTATGCCTCCTCCT  
GTGAGGCCACGGTTCACAGATGCAAAAATCAAGAGTTTCATGGTGGTGAGAGCAGGAAATTCTGCCCGATTGAACATT  
AATTTGAGGCCTCCCTTGGCCTGAGGTCATCTGGCTGAAAGATGGAGCACCAGTGTCCAAAAAGTGACCGTCAGC  
AATGCAGAGGGTACATCCCAGCTTCTGATTCCCTCCTCTGAGCGCTCAGATACTGGAATCTACACAATCATTGTTAAG  
AACATTGTTGGCCAAGAAACATTCAGCATTGAAATTAGAGTCACAGATGAACCTAAGCCACCAGGTCTGTGGAGCTT  
GATGAAAACGTGCCGTGACAGTACTATGTCATGGTCCGCATCTCCAGATGAGAAAACGTGACGACAGGCTGCACTAC  
ATTATCACCAAGCGTGATTCTGTTAAGCGTACATGGCAAACCGTGGCAGACCATCTCTTCAACAACAAGTTACGGCC  
ATCAACATCATGCCGGGAAGGCAGTACAAGTTCCGGGTCTATGCCAAGAAATGACATGGGGTCTTCCAAACCTTCTGAG  
TCAGCGACCTGGGAAGTGAAGAGAAAGAAAGAGACATTTTTCTTTGAACCTTCTGCCTCTAAGGACTGCAACTTTGAG  
ACGCCTCCATCATTCTCCGTTCCACTAAAAACCCACAACAGCCAGAGAGTTACGAGTGCTACATGAGCTGCGCAGTG  
ACAGGAAACCCGAGCCATGTTACCTGGTACAGGAATAACATCAGCCTCAACACCAACTAACTACTACATCACC  
AATACATGTGGGTCTGCTCCATGGTGATACTCAAAGTTGGGCCAAAGGACAGCGGAGATTACACAGTCATAGCAGAA  
AACCTCTGGGCAGGTGGAGTGTCAACTAAACTCGCTGTTAAAGATTAGGATGAAACTGTGCTCCTGAACTCCTGA  
CTAAGCCTGCTCCATTTAAATGCATGGAAGGTGCCAATTGAAACCTGTTGTTATCTGTTTGTGTTTTGTTCTTGT  
TTTTTTGTTGTGAATTATTGTATTAATGTGTTTTAAATACACTGAGAGAAAGAAAGGAAGAACTCTTGATAACAATCCA  
CAAATGCAAAAAGCACTGATAACAAATGTCAAAGATTGAGCTTTAGAATTTATCTACCGCATGCAAAAGAA CACTTTG  
AGGAGGGACATTTGAGATTC AACATTAGAGATATGCTAATCTGCACCCAAACATGTTTATTTATTGACCTATTTTTT  
CTGGAGCTGCGACTACACTAAGTTTTCTCTTCTGTTTTCTGAATAAGACAGAACATTTACTGATTTCTTGAAGTTAC  
CATCTCATGGATAATTGACATGAAATTTGAAATTTATATGATAATATGGCTACAACCTGAGTATGTTTTAGTGTGTGAT  
GTTTAGTGTGTTGAATTATTAATCATTGTGCAAAAATGTAAATAAATCCATTTCAGTTCAAACGTAACAAAAAACCGAAA  
CCT

>Sequ20662SNP2

GGTTCTGCTCCTAATGGTGTGTGATACCTTTTTTCGCTCCACATTGAATGATGCTGGGCCAAGTCTTCCCTAATTCTGACG  
TGTATCATATTCGAGCATGCACCTGTTGCTTTTTACCGTCATGGCCGTCTCCTGTGTGCTCACGGTTGGACTCTTTAT  
GAAGGATCTGGCAGCTCTTCTGGACGGGTGGAGATTGTGGGTGTTGGGTGGGAAGCGGGTGGGAGGTTGGCAGGGTG  
TGTGTGAGTGGAGGATCTTAGAAGATGTGAATGAAGCATGCCATATTATGCCAAACCGTCATAAGTAACGTTGGTG  
ACCTGCATTTACTTGCATCTTTTTCCCTCTTTGTGTGATTTCTCTGTCTTCATCTTTGGTTAGAATTGCGTCTCTAAT  
GCAAAATGCCTTAACATTTGCTGTTTTTGGGGTGGGGGGGGGGGGTTTTGTTTCACATATCGCGTATTGTAAAACGC  
ACCCGTTTTCCGAATCAAATCCAGACACAATGCTCGTGTTTTTCCACCTCTGAGCTCCGAGAAGCTCAAATGACCACGC  
TTGCTGTCTGCTAGCTTTGAATCTGCTCCACTATATCACTGAAGACTGGAGTTAAAAACAGTGGAGCCATATTCTCCTCCC  
TGGCTTTTACATAAAGCAAAACACACACAGGAGTCTCGTATATAAGGCTGCCATTTACCTTGATATCCTTTCTGTCA  
TATTAGCAGCGCTTACAGGCTAGTATTAAGCCAACCTCTGTGCCCTTCTGCACGTGTCGAGCTGCATCCTCTTCCCTGTAC  
ATACAGTAGATAGGACCATAGGTTTTAATGTGGCTAGGATGTCATTCAAATCCTTTTCCCTCTCCAGTGGAACTGCTGT  
ACATGAATCAAGTTTAAATAAATGCTCTCTAAAGATAACAAAAAAAAAAAAA

>Sequ20663EST2

CAGCAAACAGCCGGTCTTCTCTGCGCAGCAACCCCGTGGCTCTGGAAGGTTCTAACCGGGACCGGGTGGAAAGCAAC  
AGAATCTGAGACCATCCGAAGCCGAACCGCTGCGTACCAGCGCCGGGACTGATCCGTCCTTCTGAAGACTCGTCTT  
AACATTTCCCGTCGATTATAAAAAGTTGCGATGCCCGAAGCAATGGCGGCACCGAAAGCCTTAACCGGAGGCAAAAACA  
AAGGAGGGCGTATGTGGACCGGACAAAGCCGGCCAGATTCGGTTCAGT AACATCTCTGCTGCTAAAGCTGTTGCAG  
ATGCCATCAGAACAAGCTTGGGACCCAAAGGCATGGACAAGATGATCCAGGACGAGAAAGGTGACGTGACCTATTACCA  
ACGACGGGGCCACCATCCTCAAGCAGATGCAGGTGCTCCACCCTGCCGCCAAAATGCTGGTGGAACTGTCCAAAGCCC  
AGGACATCGAGGCAGGCGACGGCACCCCTCTGTGGTGGTGATCGCCGGAGCGCTGCTGGACTCCTGCTCCAACCTGC  
TGCAGAGAGGCATCCACCCACCATCATCTCCGAGTGGTCCAGAAGGCCGTGGAGAAAGGCGTGGAGGTGCTGACGG  
GCATGAGCCGGCCGGTGCAGCTGAGCGACCCGAGAGCGTGTGAACAGCGCCACCACGTCGCTGTGCTCCAAGGTGG  
TGTGCGACTACTCCAGCCTGCTGGCGCCCATGAGCGTGGACGCCGTCATGAGAGTCATCGACCCGGCCACCGCCACCA  
CGCTCGACCTGCAGACATCAAATCATCAAGAAGCTCGTGGGACCATCGATGACTGCGAGCTGGTGGACGGCCTGG  
TGCTGACCCAGAGGGTGGCCAACACCGGCGTGTCCCGCTTGAAGAAGGCCAAGATCGGCCTCATCCAGTTCTGCCTGT  
CCCCTCCAAAACCGACATGGACAACCAGATCGTGGTCTCAGACTACGCCAGATGGACCGCGTCTTCCGGGAGGAAC  
GCGCTTACATCCTGAACCTGGTGAACAGATTAAGAAGGCCGGCTGCAACGTGCTCATCCAGAAGTCCATCCTCA  
GAGACGCTCTGAGCGACCTCGCCCTGCATTTCTCAACAAAATGAAGATCATGGTGGTGAAGAAATCGAGAGAGAGG  
ACATCGAGTTTCTGCAAGACGATCGGCACCAAGCCCATCGCCACATCGACCACTTCACTCCAGAGATGCTCGGCA  
CAGCAGAGCTGGCAAGGAGGTGACCTGAGCCTGGACCGCTCCGGCAAGCTGGTCAAGATCACAGGCTGCACCCAGCCCCGGA  
AGACGGTGAGCATCGTGGTCCGCGGCTCCAACAAGCTGGTGTGATCGAGGAGGCCGAGCGCTCCATCCACGACGCGCTGT  
GTGTCATCCGCTGCCTGGTCAAGAAGAGGGCCTTGATAGCCGGCGGTGGCGCTCCAGAGATCGAGCTGGCTGTGCGTC  
TGGCCGAGTACTCCCGTACCCTGGCCGGCATGGAGGCCTACTCGCTGCGGGCGTACGGCGACGCCCTGGAGGTGGTCC  
CCTCACGCTGGCCGAGAACCGCCGCTGAACCCCATCTCCACTGTGACGGAGCTCCGCAACAGGCACGCCAGGGTG  
ACAAGATGGCCGGCATCAACGTCGCGCAAGGGTGGGATCTCCAACATCTCGACGAGCTGGTGGTGCAGCTCTTCTGG  
TTTTCCATCAGTGCACTGACCTGGCCACAGAGCGGTCCGACGATCCTCAAGATTGATGACGTGGTGAACACTCGAT  
AAGAGACTTGAGTCTGTCCAGTGAGTTCTGTCACTAAGCCTGTTCTGTGCTGTGAGGGATCAGAGGACTCTGTGTCGAC  
ACCAGTCTGTTTCCACTGTAGTTGTTACGTTGCATAATTTAATAAAAAACAAGGCTTGTTTTTTTTGTAGAC  
ACTACGAAAAAAAAAAAAAAAAAACC

>Sequ20671SNP2

CTGTTGGTGTGCTGTATATCAGCATATTGTCGCTGAATGCTACCAGCAACACAGATGATTACACAATTTACAATGAG

TCTGTAACATATGAAGAAGGGAGCTGTAATCTAAATTGTTACCTGGTAAAAGATGAAAAACAGTATGATGTGTTTGAGT AACACTGGACACACAGATGTAGTTTAAAGCCCTAGTCAGTCAGAACC AAAACGAGTCCAAAACCAAGAGGCTTCTTCAGT TTTTGATTTACAGAGTACTCACCAGTCAATACACTTAACACACAAAAGCATCTGAATAAAAATAAAATCAGATTTCCCA GGGTTCATCGTCTCACGCTAATTCTCTGCTGCATAAATTTCTGGGATTTGTTCTGTCTGTCTGGGACATCTGTGTGTG CTAAACTTACACTAAATGGCTTATGAATATAAAATGAAGAAATCTGGCTTCTGTTTCTTTCTACGGTGTCTAAGGGA GTGAAATTTAAAAATAAAAAAATCTTTTAAAAAAGCTTGAAGAGTGAGGAAGCTCTGCTGTATTCTGCCATTTTCCGG CTCCTTTGTGAAACTTTTAACTGTAGTGTAGTTGTAGATCAGTGACATGCATTTGAGTCTCTTAGATTTAGAGCACTGA TTGCACTCTTATTTTCAATTAAGCACAACTCAAAAGCACATGCATACAAGAAGGGCAGTGGATATTTACAGTAAAAACGA CAATAACATCACAGGGAGGCAAAGTAGTGTAGTGACAGTTGTTTCCAGGACTTGGACTAATTTGGTTCGCAGTATGAGTT TGGGGCTTCTCTGGCTAACCCAGTAGTCTCTGTTTGGCTTTGGCATGTGTCTACTGTGTGCTCTGATTGTCAGTTTATGGT TTTCAAGGGAATTAGAGTAAACAGGAAGATGAAATATTTGCTCGAGTTGTTGAGTCATACTGACTTGATTGAAATGTC TAAAATATTTGCACTGTAACCTTGGGGAGTCGTAACACGGGGTTGTACTTGTCTGTAACCTGTGTGTGCTGTATGTCTT TGAGGCTGGGTTGATTGTATCTATTTGGCATGGTCAGTAAAACAGCTTAGAAACTAAAAA AAAAAAAAAAAAAACCGACCTA CCCTATA

>Sequ20674EST2

TACGTCAGCACCCGACACATGCGGCAGCCTCTCTCCCCGTGTTAGCCGTTAGCCGCGCAGTGCAGACGGTTGAAGTC TTTCTCCGGACTCGGTGAGTTCAGGTCGAATAAAACGCTCAGAGGACGATGGCTGCCACCCGGGACGCAGGGCAGGAAG AGGCTCCTGAAGGAGGAGGACATGACCAAGGTAGAGTTCCAGACTAGCGAGGAGGTGGATGTGACCCCCACCTTCGAC ACCATGGGACTCCGAGAGGACCTGCTCCGCGGCATCTACGCTTACGGTTTTGAGAAAACCGTCTGCGATCCAGCAGAGA GCCATAACACAGATCATCAAAGGCAGAGACGTCATCGCACAGTCTCAGTCTGGAACAGGAAACACCGGACCTTCTGT GTGTGAGTGTGCTGAGTGCCTGGACATCCAGTGTAGGGAGACCCAGGCTCTGATCCTCGCTCCCACAGAGAGCTGGCA GGACAGATTCAGAAGGTGCTGCTTGGCTCTGGGAGACTACATGAACGTTTCAAGTGTACAGCCTGCATCGGAGGGACCAAC GTGGGTGAGGACATCAGGAAGCTGGACTACGGTCAGCACGTGGTGGCGGGGACACCTGGACGAGTGTTCGATATGATT CGTCCGAGGAGTCTGAGGACAAGAGCCATCAAGATGCTGGTTCTGGACGAGGCTGATGAGATGCTCAACAAAGGTTTT AAGGAGCAGATCTACGACGTGTACCGTTACCTGCCCCCGGCCACACAGGTTGGTTCTGATCAGCGCCACGCTGCCACAC GAGATCCTGGAGATGACCAACAAGTTTATGACGGACCCGATCCGGATCCTGGTCAAGCGTGACGAGCTGACCCCTGGAG GGGATCAAGCAGTCTTTGTGGCCGTGGAGAGAGAGGAGTGAAGTTTCGACACTCTGTGTGACTGTACGACACTCTG ACCATCACACAGGCCGTGATCTTCTGTAACACCAAGAGGAAGGTGGACTGGCTGACGGAGAAGATGAGGGAGGC CAAC TTCACGGTGTCTGTCGATGCACGGAGACATGCCTCAGAAAGAGAGGGAGTCCATCATGAAGGAGTTCAGATCAGGAGCC AGTCCGCTGTTGATCTCCACTGATGTCTGGGCTCGAGGTTTGGACGTTCCCAAGTTTTCTGTGATCATCAACTACGAC CTGCCAACACAGAGAGCTCTACATCCACAGGATTTGGTTCGATCTGGTTCGTTATGGTTCGTAAGGGCGTGGCCATTAAC TTTGTGAAGAACGACGACATCAGGATCCTGAGAGACATCGAGCAGTACTACTCCACCAGATCGACGAGATGCCCATG AACGTGGCCGACCTGATCTGATCTTACCTGGATGACATCACACCAGAGGCCACCCTCTGACCTGTTCTTTTCTGTCTG TTTTTTATTTTTTCTTAATAGTTTTAGAGTGTTTTTCTTAATGCGACTGTTGGGGTGAAAACGACTGTAATACTCCAGA TTTGTTTTTGTAAATAAAGTTGTTTTTGGTAACTAAAGAAAAAAAAAAAAAAAAACGAAAAACAACGTAGTACGGT

>Sequ20679SNP2

GCAGCCACGGGAGATATTGTTTCAAGTGTACAAGGACGTGTGGAGCACTCCAGTGACTAAACCCTACATGGCTCACAGA GCTCAGGGAACAGTGTGGGGGCTGCACTTCTGTCCCTTTGAGGACGTCCTCGGGGTGCGACACGGAGACGGTTTTACC AGCATGCTCGTACCAGGTGCGGGTGAACCTAACTTTGACGGTCTGGATGCAAAATCCATACCCGAGTGCAAAGCAGAGG CAGGAGTGGGAGGTTAAAGCCCTGCTGGAGAAGATCCAGCCGGAGCTCATACCCTGGACCCCAATGAACTGGGACAA GTTGACCACGCCACTTTCAACAAAGGCACCAAGACAGGGTCCAAGCTCTGGGCTTTGACCCACTTGCCAAAGAAAAAT TTATTTCCCAAGTTTAAAGAAAAAAGGTGCTAGTCTGCTGGCAGTGTGAAAGGCGCAAGAAGCAAGTGGCTCATGAGG ACCAGAGGATATAATCAGGAAACTGTGGAGGACAAAATGAAGATGAAAAAGAAAGAGAGAGGGAGAAAAGAAAGG CAGTATTATCTAGCTCGAGATCCGCTCTGGACAGATTTCAAAAAATAGAAAAGGAGGACCTTTGTGCCGCCAAACC CCACTGACATTTCTGTGGGAGTGACTTTTGAACCTTACATAAAAGGACACATTTCTTGGAGACATTACTCAACTGTGGGA ACAAACACAAAACCTGCTGAAATTTCCCTATATGGTCTGCTAATGGTTAGCAGTTCATCTGTAATCAATTTTGTAGTGCA GTAGTGGGCTGTTCTATTTAAAGCCTGTAGCATGAAGAACCTTTCTGTCTATGTGGGCAATAATGTGAGGTGCAAGGC TGGCATAAGTGTACCTAGAATAAAGGTTTAGTGTGTTTTTCTCTAATGATAAAACAAATTTTCACTCACTTTTGAC CTTTTCAAAATGATATGCTTTGGTGGCGGAGCTGACTGAACATGTGTCAAATGTTTTATATTAATATGTTATAAAAAAT AAACAAC

>Sequ20681SNP2

GCCAAGCTGTGCGATGGCGTGGCCGTGCTCAAGATCGGAGGAACAAGTGACGTGGAAGGTGAACGAGAAGAAGGACCG TGTGACGGACGCTCTGAACGCCACCCGGGACGCTGTGGAGGAGGGGATCGTTCCAGGTGGAGGCTGCGCTCTGTCTGCG CTCATCCCCTCGATCGACAGCCTCAAACCCGCTCAACGCCGACCCAGAGATCGGTGTGGACATCATCAGGCGAGCGCT CGGTATCCCCTCGATGACCATGCTAAGAACCGCCGGTGTGGAGGGCTCACTGGTGGTGGAGAAGATCTGCGAGGAGTCA GCTGATATCGGCTACGACGCCATGCAGGGGAGTACGTCAACATGGTGGAGAAGGGCATCATTGACCCCAACAGGTG GTGAGGACGGCGCTGCTGGACGCCGAGGAGTGCCTCCCTGCTCTCCACCGCCGAGGCCGTCGTCACGGAGATCCCC AAGGAGGAGAAGGAGATGCCGGGAGGTGGCATGGGCGGCATGGGAGGCATGGGCGGCATGGGAGGAGGCATGGGTTT TAAGCCGGTCTCTGACTTGTGCTGTACAGACTAAAAGGCAGAGCGGTGCTGGGGGTGGCTGTGGAGCACACGCAG AAGAAGAAAAAACAACAAAACAAAACCTTCAAGAATCTGCAACCACCTCCAGCGAGCTCTGCCACACTGACTG CCGATAGTATGTTGGAGATGCCACGCTGTTTAAATCTGTCTCTCCCTCCGGAGGACCCGGTCCGAGCAGGAGAC CCCATCGAGCCAGTTACTTACTACACCAGAACCCTCCGACGGCTCTGCTCATCGAACCAATCCACATGTTCAAACCTC ATAGTTCTTTCATGTAACCGCTCGTACAGGTGATGCCACTGTGATCTCTGTAAGAGGTAGGAAAGTGAATCAAGTCTG TAAAGAAGAACTTCAGAACTAACATAGTCATGCGTATTGATGCTCTGTATTACTGCAAAAAGAGAGCAGGGCAGGTA CGAGAGAAGATGCCATAGCCAGGAATGTGTCTGTCTTTATTTTGTCTTTGTTAGTATTTTGTAAATTCGTTTTGTTTT TATATATATATATATATATATCTGTTATGGTTTTCTTCCCCCCAGCTGATAACGACGTGGGTTAAAATCTCTCATT TGATTTTAAATTAACAGTTTTCTTTTCCAGAGCCTGAGCATTTGCTGTGTCTGTTCCCTGAAGTGACGTTACATTTTGTGTTGTC

TGGTGATGATGGAGGAAAGATCACCTGTTCCCTCGTACCTGACCGCGGCTGGACAAAGAGTGCCTACGAGTCAAAACA  
CCAGAGTCTGAGTATCACCAGGGGCTGTTGAAAACAACGTAAAAAAGTAAAGTAAATGTTTACCGAGATGTC  
TGGCCTTTTTCTTTTAAAGCCTTTGTGAGTTGTTTTACGAATGACAGCGTTTTTCTAAACATCAGTTTTGACGTGCGA  
GAAGATTAATTTCAACAACCCAGGAGGATGATGATGAGAGCGGAGGTTTACAGACAAAATGTGAAAATTTGTGGCCT  
CCAGGTGCTGCTCTGTTCTGACTACGAGTACACAGAAAACCTACCGACATTTATCACTTACATAAAAAATCTGAGAGC  
GTGGTGTAGTTTTACACATAATTACATTATTCCTTTGCAAAATGGCAAATAGCTGTGATCATTCGACTTCTGTTTTG  
TACAATGTAAA

>Sequ20704EST2

GCTATCCACTCTGGTCTGCCCCCTCTGCCTGCCTGCTCGCCTTGCCAACCGAGCCCTTCGGTCTGACCTTCCCAGACT  
CAATTCATCCAAAAGAAAAGATCCACTCCAGATTTTCAAGATGTCTTCAGCATATAGGACCACCTCTTACAGTGTG  
AAGAGTTCCAACGCCACGGAGCTTCAGCAGCAGCTCCTATGCTGGACCAGGCGGTGTCACCTCCCGCAAGAGCTAC  
AGTGTCAAGGATTCCTTTGGAGGAAGCAACAGGGGCTATGGAGGAGCTGGCATCACTAGCTCCTCTTCTATGGCCTA  
AGTCAAGCGCAGGCATGGGCATGGGCATGGGTGGTGGCTATGGTGGTGGCTTTGGTGGTGGCTTTGGTGGTGGCATG  
GTTGCTCAGGCCCCATCACCGCCGTACAGTGAACAAGAGCCTTCTGGCCCCCTGAACCTCGAGATCGACCCAC C  
ATCCAAGCCGTCCGACCCAGGAGAAGGAGCAGATCAAGAGCCTCAACAACCGCTTTGCTTCTTCAATTGACAAGGTC  
CGCTTCTGGAGCAACAGAAAATGCTGGAGACCAAGTGAACCTGCTGCAGGGACAGACCACCTCGCTCCAAC  
ATCGACGCCATGTTGAGGCTACATCGGCAACCTGCGCAGACAGCTCGACAGCCTGGGCAACGACAAGATGAAGCTG  
GAGGCTGACCTGCACAACATGCAGGGCCTGGTGGAGGACTTCAAGAATAAGTATGAAGATGAGATCAACAAGCGCACA  
GAATGTAAAAATGACTTCGTCTCATCAAGAAGGATGTGATGAGGCCACATGAATAAGGTTGAGCTGGAGGCCAAG  
CTCGAGAGTCTGACAGATGAGATCAACTTCTGAGTGCATCTACGAGGAGGAACCTGCGTGAAGTCCAGAGCCAGATC  
AAGGACACTTTCAGTCAATTGTGGAGATGGACAACAGCCGCAACCTGGACATGGACGCTATTGTGGCTGAAGTGAAGGCT  
CAGTATGAGGACATCGCCAACCGCACCCGTGCCGAAGCAGAGACATGGTACAAGACCAAGTATGAGGAGATGCAGACA  
TCCGCCAACAGATATGGGGATGACCTGAGATCCACCAGGACAGAGATCGCAGACCTCAACCGCATGATCCAGAGACTG  
ACATCAGAGATCGATGCTGTAAGGGACAGCGTGCCAACCTGGAGGCCAGATCGCAGAGGCTGAGGAGCGCGGTGAG  
CTGGCTGTGAAGGACGCCAAGCTCCGCATCAAGGACCTGGAAGACGCCCTGCAGAGAGCCAAACAGGACATGGCCCCG  
CAGATCAGAGAATACCAGGACCTGATGAACGTCAAGCTGGCTCTAGACATGAGATCGCCACATACAGGAAAATGCTG  
GAGGGAGGGAAGCAGGCTGGTGAATGGCATCAAGGCTATCAACATCTCCCAACAGAGCACAAGCTACAGCGTTTT  
CCCATGGACACCATGAAGAGTAGCTACTCCAGCGGGTACTCCAGCGGTTTTAGCGGTGGATACGGCAGCGGTAGTGCA  
TACGGCAGCGGGTGGATACAGCAGCGGGTGGATACAGCAGTGGCAGTGGATACGGCAGCGGCATTGGCGGCTTC  
AGCGGCGGCAGTGTGGCGGATACAGCACCACCCAGAGCAAGAAGAAGCTCGTTATCAAAATGATCGAGACCAAGGAC  
GGTAGAGTGGTGTCCGAGTCTCTGAGGTCAATTGAGGATTGAGCTGTCTAGTTTAGAGGTGTAGCTACCTGTCTGCTA  
TGATCTCTCTGCCCTCTCCGGTAGTTTTATACTCACAGTTCACCCCTCGCCAAAACCTTTCATAATAAACAAGTGTG  
AAGTAAAATGCTTGGCAGCCACTCTCCAATACAGCTTAACATGTTTTTTCATGAAACAGTAAATGAACACTACCCAA  
GCCCTGAAAGGGACCAAAAAGAAATTTATGATCTGATGTCTAACTGTCTGTACTAAAAGAAA

>Sequ20712EST2

TGGGGGCTTGTAAAGTCTTCCCTCATTCACGCAACCATCTGCTATCGAAATTAAGCTAAGAAATAACATTAATTTGA  
ATCAAAATCCCGTGTGGCAAAAACCTTTAGAAGGAGAAGGGATTCTGTCAGATGTAGAGGAAGAAGAGACAACCTGAAGAA  
GTCAGATCAAAAAGTAGAAGAGGCTAAAGAGCTTCAGAGTTTTGCGGAAACGACAGAGCGGAGTCAGTGTACC GCCCTG  
TTGGTTGGAGAGAACTGCCACCAGAGGCTGAAATTTGATAATGACCCATTCAAACCTAAAGACTGGAGGAGTTGTAGAC  
ATGAAGAAAGTCAAAGACAGGAACAGGGACATGACAGAAGACGAGACAGACCTCAACCTGGGCACCTCTTTCTCTGCT  
GAAACTAACAGAAAGACGAGGATGCAGACATGATGAAATATATTGAGACTGAGCTGAAAAAGAAGAAGGGCTTGGTG  
GAGGCTGAGGAACAGAAAAGTTAAGGTGAAAAATGCAGAGGACCACCTGTATGAGCTGCCTGAGAACATCCGAGTCAAC  
TCTGCCAAGAAGACTGAGAGATGTTATTTCCAATCAGATGTTGAGTGGGATCCCTGAAGTTGATCTTGGCATTGATGCA  
AAGATAAAGAACATTTATCCAACAGAAAGACGCAAAAAGCCAAAGCTTCTGGCAGAACAAGGAACAGAAAATGACATG  
GCACATCATTTGTACCAACCAACATCGCTGTCAACTATGTCCAACATAACCGCTTCTATCATGAGGATGTGAATGCAC  
CACAGCGGCATCACAGACAGAGAAGAGCCCAAGGCAAGACCGCTGCGTGTGGGAGACACCGAGAAAACCCGGTCCAG  
AAACATCATCGCCACCTAACTACCGCAACCTGCAAAACAAAAGGCCACAGATGACTACCCTATGAGAAATTC  
AGAAGATGAATCGACGATATTGAGGAGCTACACGTTCTTTGTTTTGTTTTAAGAGTTACTCGACATGATGCCACT  
TTTTAAAGAAATGAGACATAAAGATTACTTGTAGACTAGTTTCCCAAAGCAACTGTTAGGGACAGAACTCCCAAGACA  
CTGTTGTACTTTGTAAATATTGTATATAGCTCCGCTGCTATTATCTGCAGGACGATACATCTGCTTTGTAATGTGTTTTG  
GTTAAAGGACAATTCATCTAGAAGAAATCATGTATGCTCATTGTTGTTTCAAGGATGTCTGATAAAAAATGAATTCAGAAA  
AAATAAGACCATAATGTTTTAGGAAATACAGGAAGGACTTGATATATGTCAAACCTGATTGGTATTCTGCTCTG

>Sequ20719EST2

CTTCCATTCCAAGACTGGAGATGCCATGGGGATGAATGATCTCTAAGGGTACAGAGCAGGCTCTGAGCAGACTGCA  
GCAGAACTTCCAGACCTGCAGGTGGTGGCTGTGACGCGAAACTACTGCACTGACAAGAAACCAGCCGCCATCAACTG  
GATCGAAGGCAGGGGCAAGTCTGCCGTCTGTGAAGCCACCATCCCCGCTAAAGTGGTCAGAGAGGTTTTGAAGACGAC  
AACACAAGCTCTGGTGGAGGTGAACATCAGTAAGAACCTGGTGGGCTCCGCCATGGCAGGGAGCATCGGTGGATTCAA  
CGCTCACGCAGCAACCTGGTGGCTGCCATCTACATCGCTTGTGGACAGGATCCAGCCAGTCAGTGGGCAGCAGTAA  
CTGCATCACCCGTATGGAGGCATCAGGACCAACAGGAGGATCTGTACATCAGCTGCACCATGCCTTCTATAGAGCT  
GGCAGCTGTGGGAGGAGGACCAACCTGCCCCAGGCAAGCTTCCAGATGCTGGGTGTGAGGGGAGCCAGTCA  
GGACTGTCCAGGGGAGAACCGCCGCGAGCTGGCCAGGTCGATGTGCCACCGTCTGCTGGCCGGAGAGCTCTCTGAT  
GGCTGCTCTGGCGGCTGGACACCTGGTCAAGAGTACATGACACACAACAGGTCCAAGGTGAATCTCCAGGAGACTCC  
AGGAACCTGCAGCAGGAAAGCGTCTGAGAGCAGTGTGGCCTCCTGCAGGAGCAGTAACTTCAAGGATCTATGGACAA  
TCTAGAAAAAGACTAATCATTCAATAGAAAAAACAGACCTCAGACGTTCTCTGAGTGACACAGGAGTATCATGTG  
ACCAATCTCTATGCTGGCTATGAAAAGGATTCATTCAAGCTAATGGGGACTGTTCTGTGGGAAATATAAATGTATCTG  
GTTATGCTTATGGAGCTAGAAGCAGCTAATTACTGGCTTCTTTTCAAGGTTAAGAATGTCTTAGGCTTTTTG  
GTTTCAGATGAAACAGCTCTCCGGTCACCAACAGCAGCAGCTGAACACAGAAACACTGATAACTAAAGGAGCCTGCAG



CATCGCCATGTTACTGCATACAGACGGCCGTCACGAGAGGCCCGGAGGTGATGCCACGGTCAACCATTCTCACCGTTA  
CACTCCAAAGGAGCAACTTTGCCAACACACTAAAATCGTGATATCATCGTGGCTGCTGCAGGGATTCCAAACCTCAT  
CACTCGGGACATGATCAAAGAGGGCGCAGCAGTGTATGATGTTGGAATAAACAGAGTGCAGGACCCGGTCAGTGGAAA  
GAACAGACTGGTTGGAGCGTGGATTTTGAAGGCGTGAGACAGAAGCGAGGCTTCATCACTCCAGTGCCTGGAGGTGT  
GGGACCCATGACTGTGGCGATGCTCATGAAGAACAATCAAAGCAGCTAAGAACGTTCTGCTGTATCCGCCAGAGAG  
GATCCGCATGGCGGCTGCGTCTTAATGGCCTGGCGCAAATCCCAGCAACAGTGACACATTCACCCACTCCAACACTA  
CCACCCACCCCTCATTTTTACTCGGAGCAACCTGATGATCTCCCTTGCACATGGACTGGGAAGATGATAGCTTTA  
AGCCTCTTTTGTGCTGACATCTTTAACCTTTTCTAACTTCAAGTCCAGCCATGTTTAGACTGTTACATTCACTCATG  
CTGCTGCATGTTTTATGTAACAGGGTCTCAGTATTTATCATTTGCCATGTATTTCTGTGGGATTTTGGGAGTTTTAA  
AGAATCTTGAGAGGTGTTTTATTTATTTATTACAATAGGATAAATTTTAAACATGAATGGAGCCATGTTACAGTGT  
AACTCAAAGCTGGTGGAGCAGTAAAGCAAAAACAAGTGGCCTGTTTTTTGGGTTTTTTTCAGATAGTTTAGCCTTAT  
GTGTCAAGAGTGAAGGGCTAACATCATCAGGAACAAGTATGTTTATCAATATACAAGCTTTAAAGATTCACAATTG  
CCTTTGTA AAAACTTTGAAATAAATATTACAAATATGTTCTAAAAA AAAAAAAAAAAAAAAAAAACTAAGAGA

>Sequ20808EST2, Sequ20808SNP2

CTCATGTTGTTTTGTA AAAAGTAGCGTTTACTTTTCTCAGGACCGAGAGTGTTTTAGCCCAGAAAAGAATTA AATTCATA  
TCTGTACTAAACCACGTA AACAGAACTCATCCGTTTAGGCTGAATTATACAAAATGGACCTCTAAAAAGAAGCGAAC  
GCCTAATGTACAAAATGACAGCTGGGTTGTCGTTGCTGCAGACTCTGTATCGACACACAGAAGCCCGACAGTGATCC  
AGCTTTTGTGAGACTAAGGAATCCATCTACAGATGCAGCATCTCTGTATATGCTGGGTAGTGGTGTATGTCAGCTGTA  
TGAGGTCAAAGCATTTGAAGAAGATTTCCACTCCTGGTTTGTGGTGCAGACTGTACAAAAGAGATGGGAGACTTCTGTT  
CATAACACCAATGGATCCTCTCTATCTCATTTTTGCCCTATTTGATTACGGCTGGAAAAGAGGGGAAGTTCCAGCCTGT  
GGATCAGGTTGTTATGGATGAGGAATTTCCAGTTTGTCTAAGGCTGCTGAGCTGCACACGTTCCCTGGCCGCCCTGCA  
CCACATTGCCGAGGAAAAAGAGGTGGGAAGCCGAAATTTTCATCGATACAGCCAAGAGAAGACAATGAACTGGTTAAA  
GAAAAGGTGGAGAGGACAGTCGTTGCCCTCAAGAAGAGAAATATCTCAGTGGGAGAAGGAGTCAAATCCACAACATA  
TGTCAGAATGAAGTCAGAATCAGACTACCATGAGGAGGACTACCTTCGCTATGCCACGGCCTGATATCGGAGTACAT  
CAGTGAAGACCTGAGCAAAGCCCTTCTCAAACACCTGCAGTTACCAGAGCTCACAAGCCCAAAGGAGACAGAGCCGCC  
CTCCAAGAAGCGGAACTGTGATAAACCCTGGAGGCCGGAGGACTACACCAATTC AACAGTGCAGACTTTTT  
GAGGAAACCACCAAGAAGATGACGGCTGCTCAGAAAACCTGGCTAAGGTGGACAAGACCCGGCATGAAGCCTATGTC  
ATCCTTCTTCAGCCCAAGGGCAAGGCAGAAAAGAATGAATGTTGTATAGTTTCTGGTTTGTACATGATAAATTTGTA  
AATAAGAAAAGAAACATAAGAAAAA AAAAAAAAAAAACCGNGAAC TGCCAA

>Sequ20810EST2

ACACACTGAGCTGTCTTCTTGATCCCTGATTTCACTTGAAGTCACCTGCAACACAGTGGACATGGCATCAGTGTGCGC  
CAGCTCTCGCCTCAACAAGTCCGTGCGCCAGCAGTACATGAGCCTGCCGCAGGGAGACAAGTGCCAGGTACCTACAT  
CTGGATCGACGGCACCGGAGAGGGGCTTCGCAACAAGACCCGAACCTGGACAAAAGAACTGAAAGCATAGAAGAAAT  
TCCTGAATGGAAC TCGATGGCTCGAGCACGTACCAGGCCAAAGGCTCCAACAGTGACATGTACCTTATCCCGGTCTG  
CATGTT CAGGGATCTTTACCCCTGGACCCCAACAAACTGGTCTCTGTGAGGTCTCAAGTACAACCGTTTTACCTAC  
AGAGAGTAACCATCGAGCTAGCTGCAACAAGGTGATGGAGGAAATGAAAGAGCACTGCATGTGGTTTGGTATGGAGCA  
GGAGTACACACTCTTAGGGACAGATGGACATCTTTTAGTTGGCCATAAATGGATACCATCACCCAGGGCCCTTA  
CTACTGTGGCGTGGGGCAACAATGCTTATGGACGGGACATCGTGGAGTGTCACTACAAGGCTGCCCTACCGCAGG  
GATCAAAATCTGTGGCACCAATGCTGAAGTTATGCCATCTCAGTGGGAGTTCAGGTGGGTCCCTGTGAGGGTATTGA  
GATGGGCGACCATCTGTGGCCGCACGCTTCCCTGCTGCACCCGCTGTGTGAAGATTTTGGGGTTGTTGCAACTTTGGA  
CCCCAACCAATTACGGGCAACTGGAACGGTGCCGGTTGTACACGAACGTGAGCACAAGCAGATGAGGGAAGAAGAC  
GGACTGCAATACATCGAGCAGGCCATCGAGAAAACCTGAGCAAAAACACATGGAGCACATCCGTATGTATGACCCCGT  
GGAGCCAGGACAACACCAAGCTCTCACAGGTCTCCAGGAACTCCAGCATCACAGACTCTCTGCTGGAGCTGGCC  
AACCGAGGCGCCAGCATCCGTATCCCCCGCCAGGTGGCCAAAGAGAAGAGAGGGTACTTCGAGGACCCGCTCCCTGCA  
GCAAACCTGTGACCATACTCGTGACAAAAGGTGATCGCGTGCACCTGCCCTGCTGGATCCAGAAGAGGATGAGGAGTGC  
AAGTAGGAGAAAGGTGCAGCCTGTTGTACTGGCTATGTAGCAATGTTTAAATAATATACATTCCTCTGTGCGTTACCT  
GAGGTGGACTCTTGA AAAACACAAGATAAAGAAATTTGGCATGGTTAATGGTTATTGTGATAGCATGTTTATTGATC  
TAAGTTTAGCCATATAGTATAGACTTCCATCTGCACATACAGGTAATTTTCAGTACTGTAAGTGTCTTTAGAAGGAGA  
CATTTAAAGTTTTGCACAGCAGCTTTGTGAGAATGGGAAATAACCGTGTGTTATGGCTATTCTGAGCTTACATGTTCA  
TCATCTGCATTA AAAATATGAATGAGCTTGTTTTACAGGTGTTAGTTTGAATAAAGACAATG

>Sequ20814SNP2

TCATCCTTGCCACTGGCTCTGCAGACAAGACTGTGGCTCTTTGGGATTTGAGAAAACCTGAAACTGAAGCTGCATTCCCT  
TTGAGTCAACAAGGATGAGATCTTCCAGGTTTCAAGTGGTGCCTCATAATGAAACTATATTTGGCATCCAGTGGAACAG  
ACCGTCGCCTCAATGTCTGGGATCTCAGTAAAATCGGAGAGGAGCAGTCCCAGAAGATGCTGAGGATGGTCCCTCCTG  
AGCTACTGCTTATCCATGGAGGACACACAGCCAAAGATCTCAGACTTCTCCTGGAAACCCCAATGAGCCCTGGGTGATTT  
GCTCTGTGCTGAAGACAACATTATGCAAGTCTGGCAAATGGCTGAGAACATCTACAATGATGAAGATCCTGAGGGTG  
CAACAGACCCTGAAGCCACAGCGTAACACATTTACCCACATTTGTCTTAACCTTAAACCTCATCACAAACTGCCACTT  
CAGAAGATCCATGCAGTACTTCTTCCCATCCTGTTCTACTTTACTGGTGGGACACAATATGTACAAAATCACTGTAA  
ATACAGGAAAGAGAGTAAGCATGTACAGCCTGGTCTGTTTGGAAATATTCAAAAGTGAAGACCTCTCTTTTATTTCAG  
TGATTTATTGCCTCAGCCATGTTATTTGCACCTCATATAAAAAGTATATTTTGTAAACCAATTTGGCTTTCCCATATA  
CACTGAAAATGTTTTAGCCAATGCTTTTTTCAAAAAGCTTTTTCTCAACAACAAGGGGGCGATCATACTGAGAGCCCAA  
GAAAATGCTTATTACAGTAACCTGCTGTTGTGTACACACACAGCTCCCTCCACACATGTTAAAAGTGTAGAGAATG  
TCAAGTTTAAATGTA AAAAGCAAATAATGAGTCAGTTTGGTCAACACTGAATGTTCTGAACTCCGATTTCCACACCAG  
CTGTTTCTGAATCTGTGTTGAATGTCCAGTTGTTTTCCCATGTCCAGTCACTTAAACATTACATTA CTGCTAAA  
GGAATTAATAAATTTACTAATCATTTTTGTGCTTGTGAAATACATTTTTCTATGTTTGGATTTTGTCTATTTGTACA  
GTTAAATGTTAGTGCATTTCTTAATAAAAACCTGTCTTTTATTAGTCTTTG



>Sequ20816EST2

CTTGTCCCCACTGAGCTGTGACCGGTCCCCGCTTTTCATGTGCGACTGCGGTGCTAATTGCCGCTGTTGTGCGGCGAGGGG  
TCCTATACGTTATGCGCCGTTTGTTCCTCCGCTCAGAAAAGCCGAAAGCTGCTCCGGTATCCAGCCGACACCATGCGGG  
GAAAGACAGTCACTCGTACCGGGCTAACTGCGGGATAGGCAAGGCCCTGGCCGCGAGAGCTCCTGAAGCTCCGAGCCC  
GGGTCACTCATGGCCTGTCGGGACCAGCGGAGCGCCGAGGAGGCAGCTCAGGACATTAAGAAAACAAGCGGGACCTGAGC  
AAGGGGAGGTGGTCAACAAACCTGGACCTCGCCTCTCTTGGATCAGTACGAAGATTTTGCAGGAAATTAATGAGG  
AGGAGTCCAAAATGACGTGCTCATCAACAATGCAGGCATCTTCCAGTGTCTTACACGAAGACAGAGGATGGTTTTG  
AGATGCAGCTCGGTGTGAACCACCTGGGTCACTTCTCTCTACTCACCTCCTGCTGGACCTCCTGAAGACTTCTGCTC  
CCAGCCGCATCGTTGTGGTTTCTCTAAGCTTTACAAGTATGGCCACATCAACTTTGATGACCTGAACAGTGAANAATA  
ACTACAACAAGGCCCTCTGCTACAGTCAGAGCAAGTTGGCCAACCTGCTGTTTACACTCGA ACTGGCTCGTCAGCTGG  
AGGGCACAGAGGTCACAGTCAATGCTCTCACCCCGGGCATCGTAAGGACCAGACTAGGCAGGCATGTTCAAATCTCCC  
TCCTGGCAAAGCCGCTGTTCTACCTCGCCTCACTGATCTTTTTTAAGAGTCCACTTGAGGGGGCCAGACTCCTCTCT  
ATCTGGCCTGCTCCCGAGAGGTGGAAGGAGTGTGAGGAAAGTGTTCGCTAAC TGCAGGAGGAGGAGCTGATGGCCA  
AAGCTACAGATGAGCAGGCAGCCAAGAAGCTGTGGGACATAAGCAGCAGGATGGTTGGACTCACTAACTAAGCAGAGT  
CCTGTTCTGTGGAGGGTGTTCAGGGGACTTAAAGTATTCCTGGACAAGATAATTAATCCTTAGCAGCCCCACAGACTG  
TACAGAGAGAGATGGCCTTGTGAAAAGATTGCCACCTTTCAGATAAAAATCATTAAATTGACTGACATATTGTGCGCAGTGA  
AGTGTGTGAATTAAGTCTCTGTAAGCAAGTGCCTGCGAGTGTATTGCACAGAGATTGTATAAAAATTTGAACAATTA  
AAAATGTGCCAACTAACAAAAAACCAGCAACTA

>Sequ20837SNP2

AAGGTAGGCACCTGACGTTTTTCCATGGACGCACAGAAGTTTGTGCTGTAGCGGAGAGGTTGGCCCGCTTGCAGTCCGGAGG  
ACCTGTTCTGAATGCTGCCGTGGCCCCGTTCTGCTGGGTGGGGTTTGGGTGTACAGCGTGGTGTGAAGCAGGTGTT  
CGGACTCCACGCTGGGCCTGCGCTGTTTCGGGAGCTGCGAACATTGTGGCGCTGGGCCTCGGTGCCGTGTCTACTT  
GCTCACCTCGGATGCTGTGAGCCAGTGGATTGACTACAGCTCAGACAAAAATGCGGCTGCACTGTACGCGATTATGC  
CAAAGGAGGGGTTGAGTTTTACGATAAGATTTTGTCCAGAAAACAAGACTCTGCGCTCTCTGAGGGGGCCAGAAGGGAGA  
GGAGATGTATGCTCCAGTGGGAACTTGTTCCTGCTCACCTCCTCAGCTGAAACATACTCCGTATACATCCAGGAG  
GGAAGGATCCTAGCTTTACTGAAAGAAGAGAAAGTTTGAAGAAGAAAGGGGAGGAGGGCTGTTATGTTAAGAGTTAA  
ATCATTGTAACTGGCCTCACATGAACGACTGTAATTTATCTACTTGGCCTTGTCTCTGAATAGACTCCAGTGGCGTAG  
GAAGTCTCTGAGCTTAACATTTCTTTTCAAAGAGATATGTATCCACATGTTCTGAATGTTATTTTGTGAATCATGA  
AGTGCAGAACAAATCAAATTAAGAAGTCTAGTAAACCCCTGGGGTCTCAGATTTTGTAGTGGCGTGTGTGACTGGT  
GACTTATTTTATCCAACAGATTAATTTCTGGATCCAGAGTACAAGTAAATTTACTGTATCATTAACATGTGTTAATACAAC  
CACATGTTCCAACAGAAAAATAAAAAATAAATAAGAAGTGTCTTTTTAAGGTGTTTTTTATGTCTCTAGATATTACAA  
TTACAACCTGCAAGGAATGATCTGTGTGGCAAAACTCGGTTAAACAGGCCAAAATTTCTAAATTACATTTATTACAT  
CCTATTATTGTTATCTAGCCATGCATATAAATTTTCTGAGTAATATTGTTTTTTCAGAAACGCATATTTTAAATTTCT  
GTGACTGCCATTTTTCATATCTCAGAACCTGAAACCCCTTTATTTCTCCCCATTTTTCAAAAAGAGAGGGGAATCATC  
ATAATAATCATGCATCACTGGAGATTTCTATTGCACATCGTAGCCTCACTTCAACAGACTAGTTAGACAAAAGCATT  
TTCTTTCATTTTGAAGAATTTGTGGTGGAGAATGTGAGGCGTCTTGGGTTCAGCATCTCCAGGTGTGTTACCCTCA  
ATGAAAGTCAGGAAAAACCATTATGGAGGAAAATATCTGGATTTCTCTGGAATGGACTGGTACTTAAAAAGCTGTGTA  
CTGTTTTTGTGGTGGAAATGTTAAGCCATATTAATGAATGAATC

>Sequ20888SNP2

CCTTTTTTTTTTCTTCTCATACCGGCAAGGACAAGTCAACCTCGCCGCTGTCCATCCCAACACAACACCTACAGTCAT  
CCACGGTTCAACAATTCGGAACATGTCTAAGGGACCAGCAGTTGGTATCGATCTTGGGACCACCTACTCCTGTGTTG  
GTGTGTTCCAGCATGGCAAAGTTGAAATCATTGCCAATGACCAGGGCAATAGGACCACACCCAGCTATGTGGCCTTCA  
CGGATAGTGAGAGGCTAATTTGAGATGCAGCCAGAAATCAGGTTGCCATGAACCCCAACAACAGTTTTTGTATGCCA  
AAAGACTGATTGGCCCGGTTTGTATGACACAGTTGTGCAGTCAGACATGAAGCACTGGCCATTTAATGTCAATG  
ACAACACTCGTCCCAAGGTTTCCAGTTGAGTACAAGGGTGAAGTCCAAGTCTTCTACCCAGAAGAGATCTCTTCCATGG  
TGCTGACAAAGATGAAGGAGATTGCTGAAGCCTACCTCGGAAAACTGTCAACAATGCTGTAATTACAGTGCCAGCCT  
ACTTCAATGACTCCAGCGCCAGGCCACTAAGGATGCTGGCACAATCTCTGGTCTCAATGTTTTCGAATCATCAATG  
AACCAACTGCGCTGCCATTGCTACGGGTTGGACAAAAGTTGGGTGAGAGAGGAAAGTCTCATCTTTGATCTTTG  
GTGGTGGCACTTTTGTATGTTGCTCATCTTGACCTGAGGATGTTGATCTTTGAGGTCAGTCTACTGCTGGAGACACT  
ATCTTGGCCGGGAAAGATTTGCAACAACCGTATGGTCAACCACTTCACTCGCAGAGTTCAAACGCAAGTACAAGAAGGACA  
TCAGTGACAACAAGAGAGCTGTCCGCCGCTGCGCACCGCTTGTGAGAGGGCAAAGCGCACACTGTCTTCCAGCACCC  
AGGCCAGCATTGAAATGACTCTCTGTATGAGGGAGTTGATTTCTACACCTCCATCACCAGGGCTCGTTTTGAGGAGC  
TCAATGCAGACCTCTTCCGTGGCACTTTGGACCCCGTTGAGAAGTCTCTCCGTGATGCCAAGATGGATAAAGGGCAGA  
TTCATGACATTTGTGTTGGTTGGGGGCTCCACCCGATCCCAAGATCCAGAAGTTGCTCCAGGACTTCTTCAATGGAA  
AGGAGCTCAACAAGAGTATCAATCCAGATGAAGCTGTGGCCTATGGAGCTGCTGTCCAGGCTGCCATCTGTCTGGTG  
ACAAGTCAGAAAAATGTGCAAGACCTGCTGCTTCTGGATGTCACCCCTCTGTCCCTGGGTATTGAGACAGCTGGAGGTG  
TCATGACTGCTTGTATCAAACGTAACACCACCTTCTACCAAGCAGACCCAGACCTTCAACACTACTCTGACAACC  
AGCCCGGTGTGCTCATCCAGGTTTATGAGGGTGAGCGTGCTATGACCAGGGACAACAACCTGCTGGGTAAATTTGAGC  
TTACAGGCATCCCTCCTGCTCCTCGTGGTGTTCCTCAGATTGAAGTGACATTTGATATTGATGCCAATGGCATTATGA  
ATGCTCTGCTGTGCGACAAGAGCACTGGAAAGGGAACAAGATCACCATCACCACGACAAGGGTGTCTGAGCAAGG  
AGGACATGAACGCATGGTCCAGGAAGCTGAGAAGTACAAGGCAGGAGGATGACGTTTCCAGCTGACAAGGTGTCTGTCA  
AGAACGGCCTGGAGTCTGATGCTTTCAACATGAAGTCAACTGTGGAAGATGAGAAGCTTGGCAAGATCGCTGATG  
ATGACAAGCAGAAGATCTTGGACAAGTGTAAATGAGGTCTCAGCTGGCTTGACAAGAACCAGACTGCCGAGAGGGATG  
AGTATGAGCATCAACAGAAGGAGCTGGAGAAGGTGTGCAACCCCATCATCACCAACTGTACCAGAGTGTGTTGGTGGCA  
TGCCCTGGCGGTATGCCAGAGGGCATGCCTGGTGGCTTCCCTGGAGCTGGTGGTGTGCTCCTGGTGGTGGATCCTCTG  
GACCAACTATTGAGGAGGTTGACTAAACATTTTCTAATCATTTTCACTACCTCTGAGATGTTTGTGTTTTTTTTT  
AAGAAGTTAACCTCTTATAGCAGTTACAACAAGCTAAAGAGTGAATTTAACAAAGTAAAATAGGGTTCCAGGGATCA  
ATTTTGCATCATTTGTGACAACCTGGGAACAGCTTGTAGTTGGTAAATTTGATGGTTTCGTTTACATGTCAAGTGTGTTTGT

ATTCTGAGATGTCACTGCCTTGACAATAAAAGTCTT

>Sequ20924EST2

GTTTGGCGGTTGCATTGAGTACCTCTGAAAAGCATCGTCTTAAAACATGTGAGAAAAGGAGAAGTTGACTTAACTGG  
TGCCAAGCAGAACACGGGTGTGTGGCTTGTAAAGGTGCCAAATATCTCTCTCAGCAATGGGCAAAAAGCAACTGGCAG  
AGGAGAGGTCGGGAAACTCCGAATCTGCAAGAAAGGGAACCAAGGAAAACCAGAGGTCAGTTTCACTTTGAATGAAGA  
GCTGACTGTGATTACAGGTATAGAAGACAAAACGGTGTCTGCGCCCCGAGACCACCGTTCACCATGCAGTCAGTGGG  
AGGTCAGATGTTGGCAGTCTTACAGAAAAGTTTCATCAGGCCAGTCAGAAGAGAGATCTGATGGCAGCAGCTCAGGTTT  
GGGGCGGGCAGGTCAAAATAAAATAGCCTTGGAGGGAGTGGTGGTACAGAGAGCAGAGTGCAGACCTGTGTAGTGTG  
AAAGCTATATGAGACTAAAGAGGTTACAAATAGAAGAGTCCCTAAGCCAGCCAGGCTGTCACAACAGTTGGATAAAG  
CTGTCAACCAGCAACTACAAACCTGTGGCCAACCATGCTTACAATCTTGAGTATGAGCGGAAAAAGAAGGAGGAGGGCA  
AGAGAGCAAGAGCTGACAAACAGCAGGTGTTGGACATGCTGTTTTCTGCTTTTGAAGACACCAGTACTACAACATCA  
AAGACCTGGTGGATATCACGAAACAGCCTGTGAGTTACTTGAAGGAAATCTTGCAGATATTGGCA TCTACAATGTGA  
AGGGAACACACAAAAATACCTGGGAGCTCAAGCCAGAGTACCGACATTACCAAGGCAGGAAAAGACTGACGAGTAGT  
TTCTGACCCCTTTGAAAGGTCGATGCACCACCTCTTCATTTGACAGAGGTCACCCCAAGGTCGGGCTTGGAGCTCACT  
CCTGATTTCCCTTACAATCAGGTCACAAAACACACCAGATGATGAGGTCAGCAAGAAAGATTGAATTTTACAAGGAGAGG  
TGTTGTATCTTCTGTTATTTTGTAGGAGACAAAAGGAGGGACAGTGGGAAAACAACCTGAGGTTTATGCTCAAGTGC  
ACACCATCATAGCTCCTGTAAGGCCTCAAGGTAAGCCCTGGTATTTGACTTAGTGTGTTTTGTCTGTGTCAGAGGCA  
TAGGTTGTAGTATTTAATGAAGCAAAAGATGTGTTTATGAACCTCTCGTTCCTGGCATTGAATTATTTTTCTAATGTTT  
TGACAAGTATATCCAGAGGGAAAGGAGCTTAATGTTAATGGATAAATGTTAACAAAAGGAAGGATGTGACACTGGTAAT  
GGCCCCCACCACCTGAATGATGTGTTGAGGTTTCTTTTTCTACATGTGTAATGTTTTTAGAAATACAAATTAACCTGG  
TTTTCCCCACCATGACTTGCAAAAGACAAATTTCTGCTGAACCTTGCATTGGCAAAATTTTAAAATCTACACCATTGCTGT  
TGTGTGTTATGTTAACTGTTAATTTTAAAAGTGTTTTACATTTGATTGACTTATGCAATAAATGTTTCAATAACAAAA  
AAAAACCGAAACCTCCCTA

>Sequ20931EST2

TACTTAATGTTTGGGTATTAGCTGCGTAAAGGCAGGGCAGGGCTTGGCCAGATCATAACTTGGGATTTTCACTGCTTT  
CTTTCTTTTTCGTTGCGGGTCCAGGACAGGGGGGAGACTACATGGATTGGTGGACTTCGTTGGCAGCGTGTATTGCC  
TGCTGTGGATATTCTGCTTCATAGACGGCAACGCCGTGCTTGAGCTGCGGCTGCTCTTCCATGCTCTGACCAAAGCAG  
CTTGTACCTGTACCTGGCTCTGCTCCCGCTGCGCCGAGCCGCCACGCACCTCGCCGACTGTGCAAGATACCTTTTCA  
ACCATGCCAGCAGACCCCTCCCTCACGGCTACCCCCACCAAGGCCAACCCCTGGCCAGGAAAAGGCACGCTGCACTT  
CCTGAGGGCATGTGCGTGGTGTGCGAGACGGTGCCTAACCTGATGGGCGCAGCGCTCAGTGTGGGCGCCGCTTCTGC  
CACATGCTGCAGGAGGCTTCTACGTCCTGGCGGGCAGCGCTGCGCACCATCCAAGTCAACCTGTTTCCCAAATGAAC  
GGCAGAAAGGAGAGATGGGACAAAAGAGCGACACAGAGCCAGAGAGAGCGAGAAAAGTTAAATTTCTAAAAGTGTGGAA  
ACATCTCGGTGTTTTGTCAAGACCCTGTGAGCGCTTTACGCATCAAGGTCGACGCTGCCACCTGTGTATAGATAATCTT  
TGTCCTTGTAATAAATTCCTGGTTAATTGGCACATAAGAGGCCTTCTTCTAATGCTGAGGAGTTACAGGTGCAGGC  
AGAGTGTGATTGGTTTGCAGAGAGGACAGGAGGTTGAACCTTTCAGCTCTGGTGTGTTGAGGGAATAGTACCAACAG  
AATCAGAAAAGAAATGATATTCAAGTGTGAAAAGATAAAAACAATCTATGGTGCATTTTGTACATTTGTTTTACATT  
TATTGAGATGTAAAGAAATTTAAAATAAATTTCTCAAAACGAAAAAAAAAAAAAAAAAACTACGTA

>Sequ20932EST2

GGGAAAGATGAGGGGTTTAGCACCAAGCAAGAAGATTGCTGCTGTGCAGCAGAAAAATGTTGATCTGAAAAGTAAAAA  
GGCAAAACAGAAGACCCAGGGCCGGGTGAGGGTACCAGCAGTGGGGAACGCCACAGGGACCACGAAAAAGAGGGC  
TCGGGTGATCCCACTGTGGAGAGTGAGGAGATGTTTACCAACCGTGTGGAGGTGAAGGTGAAGATCCCCGAGGAGCT  
GAAGCCCTGGCTGGTAGACGACTGGGACCTCATCACCAGCAGAAAACAGTTGTTTCACTGCCTGCTAAGAAGAATAT  
AGAGACTGTCCTGGAGGACTATGCAAACTATAAGAAATCAAAAAGGAAAACCTCGGACAATAAGGAGTATGCAGTAAACGA  
AGTGGTGGCAGGGATTTCGGGAGTACTTCAACGTCATGCTGGGTACGCAGCTGCTTTACAAGTTCGAGAGGCCGCAGTA  
TGCTGAGGTCCTGACTGAACACCCAGACATGCCGATGTCTCAAGTTTATGGAGCCCGCACTTGTGCGCCTATTTGT  
TCGTATTGGAGCCATGCTGGCCTATACTCCACTGGACGAGAAGAGTCTGGCTTTGCTGCTCAGTTACCTCCAAGATTT  
CCTCAAGTACCTGGTAAAAAATTCATCCACCTCTTTCAGTGCAGTACTACGAGGTTGCACCCCAAGATATCACCG  
CAAGCTGTGTAAGAGCTCTCAGTACACCGTGTCTTCAAGGACAGTCACTCCCCCTCTCCAGCCACATGTAA  
ATAACCTTACTACCTTCTGAGTGCAGACTTCGATGAGATTTTTTCACTTGAAGTACTGATGCGCTTCCACACAGTGGTC  
TCAGGAGCTTGGCAGAGTTGAGTAGTCAAAAATTTGAGGAAACCTTTTGTAGCTCACTTTTCTCTCCCTTTGCCTTTT  
TTCTCTCACTTATTTGAAAAGACACAAGAAAAAAGTTTCTGTTGAACAGTACTGTTTCCACAAGCAGCTCTTTGGT  
GTTTTTGTGCATTCATCTGATAGGATTTTGTACTGTTGCATGTCTGTAATTTATAGTGTTCCTTCTGCCACATGAG  
GTGCAATTTAATGCTGGACCACATGGTCAGCACTCAGCAGTTAATGTTTTTGGATCTGTATCTTGTGTATTTGTATCA  
AATTTAGTAAAAAAGGTTATACACAGACCAATAAAAAAAAAAAAAACCGAACCTACC

>Sequ20975EST2

CCGGAAGTAGCCAGGGTGGGATTTAGAACAGGACGAAAACGAAGGCATGGGTGTGCATATGTTGTGAGACGCCATGTC  
CTCCTAGTTTCATCGTAGCTTTTATATTTATGTGTAGGTGTGTAGACTAAACAGCGCAATGGCGGCGTGGACCAGCCG  
GTTTCTTCTCAGCGTGAAGTCTGACTCGTTTCTCTCCGAGCAGTAGCTGAAAGCAGTCTGTCCAGTTGGTGGGTTG  
TATTAGGACAGTAAAAACCAACATAGTTTGAAGAACACCTCACAAGGACAACCAGGATACATGAGGAAAGAGCGT  
GGCAGAGGAATACAGAAGACAGATAGCTGATAAGCTCAACCCACTCAAAGATGAGCCCTGGCAACGGCAGGAATGGTC  
AGAGGGGAGCCGAAGAGTGGGATTAGTTGCTGTGAAATTTGGGGATGGCTCCTATCTGGACGAAAACAGGAGAAAGACA  
TGTTGTTACCATGTTACAGGTGCAGGACTGCCATGTAATAAAGCAGTGTCCAAAAGAAATATGATGGACACACAGA  
CGCTCTCATTGTAGGAGGGAAAAACGCATCACCATTCATAGGTCGAAAATGAATTGGAGATGTTGAGGAATGCTGG  
AGTGGCCCCGAAACAGAAGGTTGTACCTTTAGAGTCTCTGACAACGCTCTCATTAAGCCAGGCACTCCTCTGTATGC  
AGCACATTTCCGTCAGGCCAATATGTGGACGCTCACAGCCAAATCCATTGGTAAAGGTTTTCAAGGAGTAATGAAGCG  
ATGGGGGTTCAAGGTCAGCCCGCCAGCCACGGCCAAAACAAAACCTACCCGACAGCAGGAGCTTCTGGACCTGGAGG

GGATCCAGCCAAAGTTTTCAAAGGGGAAGAAGATGCCCGGCAGAATGGGGAACACCTACATCACAGCTTATGGATTGAA  
GATATGGAGGGTCAATACCAAGTATAATGTGCTGTATGTTAACGGCTCCATCCCTGGCCACAGGAACTGCTTACTGAA  
GGTAAGAGATACTGTGCTGCCAACAGGAGCTCCACACTGCTCAACCCCTCTTTCCCCACCTACTTTACCGAAGAGGA  
GGCTGACCTTACGAAAGACCTGTACGATGATGACTTCTTCACTCACACAGAACCATCATTAACTGACTGACCTGACGACG  
CAACACACACACATTTCTCATTACATACCTAAACCTGCAAACCTGTATCTGGATCCTGTAATAAAGAGTAATTTACTTAA  
CGAAAAAAAAAAAAAAAAACCGCTACCGTACCGACCTACTCGTCG

>Sequ20976EST2

AGTTTCGGGGCGGGCTATAAGGCTTGTTTTTCCAGTCTTACGGACTCGACGATCTCCATTTTGTGTGAGCTGTGAAAGC  
CGAGCAAGCGTCGTCCCCGCAAAGGCAAACCCAGGAAAGACATAAAAAGTCAAAGTTAGCCGACGAACCGCTCGCTA  
ACCAAGTTATATCCGAAAGGAAAGCAAATCTTATCGTATGTCCGCTATCCAGAACCTCCAAACTTTTGACCCCTTTG  
CTGATGCAACTAAGGGTGTGACCGCTCCCAGCCGGGACAGAGGACTACATCCACATAAGAATCCAACAGCGGAACG  
GCAGGAAGACCTCACCCTGTCCAGGGCATCTCCGCCGACTATGACAAGAAGAAGCTAGTCAAGGCCTTCAAGAAGA  
AGTTTGCTGCAATGGGACAGTGATTGAGCACCCAGAGTATGGTGAAGTGATCCAGCTACAGGGAGACCAGCGCAAGA  
ATATCTGCCAGTTCCTCATTGAGATTGACTTGGCCAAGGAGGAGCAGCTGAAAGTCCACGGCTTCTAGAAGCTGCAAA  
TCAGCCCTCTCCCATCTCTCCTGGAAGGCCATTACACCCCTCCCGTCCCTCCTCCTCCTTATGTGCTGTTGCTCT  
TCCTCCCTCTTCCCTCCTTGCAGCCCTACCAGCTCCTATTAGCTAACACGTGAATTACCTCTGACAAACATGGGACT  
CTGTAACACCCTGCCCCCTACAACACCAGGGGGCAGGCTCGCTCTCACAAGACACACCCTGCAGCTCCACACAA  
CATCAGGGATGAGTGGTGTGACCCCTCCACACACACTTCCCTCCTTCCCTTCCCTTGTATTTCTTTTTAATTT  
TTTCTTTTTAGGTCTTGTGCCACAGTAAGGAGGCACCGTTTCATGTAACCTTTTTGTGTTGTAAGGTGTTTCAAT  
AAAACGATGAGTCTCCATATGCTGGAGTGGAGTGGTGTCTGGGGAATGGGGTGGGGCTGGATGTGTACAGGAGGGT  
CATACATTTTCTAATGGTGTCTACTGATGAAGTGGGTTAGAAGAACAAGGCTTTTAGGTGGGAGGATGGGGGAAAGGG  
GATTGCCAACATAAGTAATTACCCTCTTTTTCAGTCTTTCAACATCCCACTGGCGTTTACATGTTTCAAGTTCCTGCTC  
TCAGTTTACAGAGCCAAGTTTGTAAAACGCTGACTGTCTCCACCACCGCTCCCGGAAAATGTGTTTTTGTCTTTTAT  
TTAATGGCACATTTTTCTAATTGCTTTTTATTTTTAATTTTTTCTTCTTTTGTGCTGCCATGTGAGTTTTGAAA  
CTAAATGGGTGTTCTCTGGTGGTCTTATTTTTGGTCAAAGCAGGGCATGTGATATGAAAAGGCTGAGTCAAGTCACTATG  
TGATCAGATGAACCATAGAGTGGGAAATGAAATCAAATGCTGGTAAATCTTTGCCCTAGTGTAGATCGATGGCACT  
AAGCGATATGATTTCTAGGTGGAAAAATTAAGAACATAAATTTTACCCTGTAATGAAGTGAAGTTAGTTTCTACTCTGGC  
ATTTGACCAGCTTCTGGTGGTCTAAAAACAAATCTGGTACCAAACCTGTGGTTATACACACTTGAATCTTTAAT  
TCCTATAATGCAATAATTTATAAATACAAGTAAAGATGTAGTAATGCTGAAATAATACAGTAAAAAATAAAGCCATGG  
CCAGGTCACACTGTGCTCCTGTGACTGGAGGTGAGAGAGCAAGTCTGTTTTGCAAAATCCACATTTGGTTCAATAAAA  
TTTCTGCAGTTGATGAACCAAAAAAAAAAACCGCTACCT

>Sequ20985SNP3

GAAGATGCGGTGTTGCGCTCCATCCGTTCCAGCCCCCTGTTTCTCTGTACCCAGCCGTTTGCTCCAGCAGCCACTCTCC  
CCTCTGGCCAGTTGTGTCCCTGCGTCCACCAGTCAACCCACCACCTTCCCTCCTGCCGCACTCCTGGAGCACTGGG  
AGCCTGTGTGCCCCCCGGTGTGTGCTGCTCCACGCCACTTCCACCTCCATCCCCACAGCACAGAGGGGGGAACCTGCCAA  
TGGACTGTGGGGATGGATAGTTATCCTGAGTCACTACAGGCCAAAATGAGGAATGTATTTTACAGTGAATTTTTTTT  
TTTTTACCAGAAAGGTCAGAGTGTGTAGGTTTTGTACATATTTGGAGCATGAATAGAGTGAATCGGTTTTTATACTT  
GGTCAAGTATGTTGATATATTGTGATTTTTTATAAATAAGTCTGAAAGAGCTGTGATACAGGGTCTGACAATAATGT  
GTACAGAATGAGGGATGGAGTCTTTTCTATTATATATTTCTGTCTTTTTCTTATAAGCTTCCCTGTAATATAAAATAT  
GCTATGGGTGAGAAAATGATCTAGGTGCCTTTTGAGTGGGTTGAGAATCTCAGGTAGTTACTGGTTCCCTCTTCTCTG  
ATGTGGGATTAATCATATAAAAAATGTTGATCATAATTTTGTCTTCTGTAATAATGATTTTACACCCTGA  
AACAGTATCTTATTTATCTCCAATAATACAATTTGCTTAGGTATAATGGTTCAGTGCTGTCTGTAATGTGAAAGGTAT  
AAATGAGGGACTACAGTTGGGAAGAAAAAGAGTGTGAACCATAACAATACCAGAGTGAATTATGATGCACCTGTGAGG  
AAGATGTTCTGTGTGACTGTTAAACAAAAAAT

>Sequ21009EST2

AGCAACAATGAAAACCTCCAAGCAAACCTACATACTCTATGCGCTCCTCCACCAGTAGCAGGGCTCCTGCTATATCAAT  
CTCCCGTACCTCTTTTCTGTCTACAAGGCCCTTCCATCCACGGTGGGGCCGGTGGGGACCGCATCAGCATCTCCTC  
CAGCTCCGACGGTCTGGGATCTGGGATGGGAGCTGGGATGGGAATGGGCTCCATGAGAGTGGGGCTTCTCCAG  
CAACATCCAGTGAAGTCCAGCGGGGAACAGCGCCGACATCATGGGCAATGAGAAGTTCGCCATGCAGAACCTGAATGA  
CCGCTGGCCAGCTACCTGGAGACGGTGGAGAACCTGGAGCAGGCCAACCAAGCTGGAGATTAAGATCAAGGAGGC  
CCTGGAGAAGAGTGGACCCGACTTACAGAGACTACAGCAAGTACCAGGCCATCCTGGACGACCTGAGGAGGAAGGTGTT  
TTGATGCCACCACGACAATGCCCCGCTGGTTCTCAACATCGACAACGCTCGCTGGCAGCCGATGACTTCAGAGTGA  
AATTCGAGTCTGAGCTGGCCATCCGCCAGTCTGTGGAGGCCGACATCGTCCGGTCTGAGGAAGTCACTGACGACACCA  
ACATGGCCGCATGAATCTGGAGAGCGAGATCGAATCCCTGAAGGAGGAATCATCCACCTCAAGAAAGAACCATGAAA  
ATGAAGTAATGGAGCTGCGTAACCAGATTGCCAGTCCAGGAGTCCACGTGGATGTTGACGCTCCCAAGGGACAAGACC  
TGGCTCAGATCATGGCAGAAAATCAGGGCCAAGTATGAGAAAATGGCAGTGAAGAACCAGGAAGAAGTGAAGCATGGC  
ACGAAACTCAGATAACAGAAGTGCAGACCCAGGTCCAGCCAGAACACAGAGGCCCTGAAGGGCGCCAGACAGAGGTGA  
ATGACCTGCGCAGACAGATCCAACCCCTGGAGATCGACCTGGAGTCCAGAGGAGCCTGAAAAGTCTCTCTGGAGGGCA  
CGCTGAGGGACACGGAGATGCGTTACAACATGGAGATCGAGTCTCTCAACACCGTCACTCTGAGTCTGGAGGGCGGAGC  
TCACACAGTGCCTAACAACATCCAGCTGCAGTGCAGGAGTCAAGCCCTGCTCAACATGAAGATGAAGCTGGAGG  
CCGAGATCGCAACATACAGACAGCTCCTGGACGGCGGAGACTCAAGCTCCAGGACGCTTTGGAAGACAGAAAACAG  
TGAAGACCAAAGTGTGACTGTACACAGACCCTGGTGGATGGAAAGGTGGTTTTCTCCAGCACAAAAACCAAGGACC  
TTTGAACACCAGAAGCAACCACCTGCCACCTCCCAACCATCACTTTCCCTGCATCATAACACTAACAAACGATTGGCC  
AAAATTTTTATTTCAATGGGTTTTTCTGAGCTCTTAGTCTGACAGCTAACCCCTCTGAGCTGTGCTGCCATTAG  
TTTACTTCTGGGTATACAGCTCTTCCACAGGCTGATAATAAAAACTGGATCAGAGGAAAACATAATCATCTTTTAT  
TTATTTTATCATGGTGTATTTATGTGTTTTTGTATTGACCGGCAGATGTTTCAAGTAAATAAATAAAGAGTCTTAATTAATGCAAAAC

ATTTTTTTTTTATACTTCATCATCTTTGGTTTTCTTTCTGTCCAGTTAAGTCTGCCCTGTTGCGCTGTCATGTTCAAAC  
ATTTCAATAAAGTCCATTTGAAGG

>Sequ21019EST2

TTGTGCGGCGGTTTCTGTGCGGTGAGGCGGTGCCTTCCCTGCCTGCTCCAGACTGCGGCGGGTAGAGCTCTTCGGTAC  
AGAAATGGCGGAGGGGAGTTGGACGTCGACTCGCTGATTTCCAGGCTTTTAGAGGTGCGAGGATGTCGTCCAGGGAA  
GATTGTCCAGATGACGGAGGCTGAGGTGCGCGGCTCTGCATCAAGTCCCGGAGATCTTCCTCAGTCAGCCAATCCT  
CCTGGAGCTGGAGGCTCCACTCAAAATCTGTGGTGACATCCACGGACAATACACAGACTTGCTGAGGCTCTTTGAGTA  
TGGCGGCTTCCCCCAGAGGCCAACTACCTGTTCTGGGCGACTACGTGGACAGAGGGAAGCAGTCTCTGGAGACCAT  
CTGTCTGCTGTTGGCGTACAAGATCAAATACCCCGAGAACTTCTTCCTGCTCAGGGGCAACCACGAGTGTGCCTCCAT  
CAACCGCATCTATGGCTTCTATGACGAGTGTAACGCAGATTCAACATCAAGCTGTGGAAGACGTTACCCGACTGCTT  
CAACTGCCCTGCCATCGCTGCCATAGTGGACGAGAAGATCTTCTGCTGTCACGGAGGTCTCTCTCCTGACCTACAGTC  
TATGGAGCAGATCAGACGCATCATGAGACCCACAGATGTGCCTGACACAGGCCCTCCTGTGTGATCTGCTGTGGTCTGA  
CCCAGACAAGGACGTCACGGGCTGGGGAGAGAACGACCGTGGCGTCTCCTTACCTTTGGAGCTGATGTGGTACGAA  
GTTCTGAACCGCCACGACCTGGACCTCATCTGCAGAGCCACCAGGTGGTAGAAGATGGTTACGAGTTCTTTGCCAA  
GCGGCAGCTGGTACTCTGTTCTCGGCTCCAAACTACTGTGGAGAGTTCGACAATGCAGGCGGCATGATGAGCGTGGA  
TGAAACCTGATGTGCTCCTTCCAGATCCTGAAGCCATCTGAGAAGAAAGCCAAGTACCAGTATGGAGGGATGAACTC  
TGGTTCGGCCCGTCACTCCTCCCGCACAGCCCAACCTCCAAGAAACGATGAAGGACGAGGGAGGAAGAGACAGAAC  
GAGAGAGAGATGGTTGTCAACAATTGTCTCCCGTTGGCTTTTCCACAACATAAGTAAAAGCAACAGTTGGCAGAGGAGA  
AAACAGATGAACACAACCTGTTTTAAAAGACACACCCACCCAAACCTGTCTTTCATTAATAAATTTTCTTTTATCTCC  
CTCTGAACGTGCTCACCCTCTTCTTTTTCATCAATGCTTTTTTTTTTCTCTGCATCTGTGTAACATTTTGAATAAC  
AAGCGTTAAAAGAAAAATGAAAAACATGAGGGTATCATTCTGTAGCATATTTGGAGTGTCTTTCTTTTTTGTGCTTTTTG  
TCCTTTGCCTTTTATTTTTGAAAAACAGAATGACAGCTAGTTTAGTTTTACCACATTTCTTACTTCCCTGCCTGTACAG  
ACACAACAGGTATTAATGACGACTGCTGGGTTTTCAATAAATAATACAGGGAATAAAAATACCAAAAAAAAAAAAAAAAA  
AACTAGAGAC

>Sequ21022SNP2

CCTGGAGTCCCTCGCTGCACGTTTGACACCTGAAAAACATATCGCCGCCACCGCGTCACTGTCTCTCGAAAAAGCTGC  
CCGGAGTTTGGTGAATCCGGTCCGGGGGCTCCTGCGGCTCCGGCTCGCGTCCGAGCGGACTTACGCCCGCGGTGC  
CGAAGCCAGGGCGGTTCTGAGAACGAGCTCGACGGTATCCGAGCCGCGGGACGTTGGAAGCGGAGAGGATCATCAC  
GTCCAAGCAGGTCCTCAAATCAACGTGGATGGCAGTCGTGGCAGCATAATGAATTTCTGTGCCAACAACTACCTCGG  
ACTGTCCAGTCACTCCAGAGGTGGTGCAGGCAGGGATTGATGCTCTAAAGTCGTACGGAGCCGGATTGAGCTCAGTCAG  
ATTCATCTCGGGACACAGGATCTGCACAAAAACCTGGAGCAGAAGCTCGCAGATTCACGAGAGGGAAGACTGCAT  
CCTCTACGCCAGCTGTTTTGACGCCAACCGCCGGCTGTTTGAGGTTCTGTTGGTCCGGATGACCGCGGTGCTGTGA  
CGAGCTGAACCATGCCTCCATCATCGATGGGATCCGTCTGTGTCGGGCGAAGAGGCTGCGCTACAAACACATGAACCT  
CGGTGACCTGGAGAACAAGCTCAAAGAGGCGCAGTCGTCTCGTATGCGCTGGTTGTGACGGATGGAGTCTTCTCCAT  
GGACGGAGACGTGGCTCCTTTACAGGGAATCTGTGAGCTGGCGGAACAGTATGGAGCCATGGTGTATATAGATGAATG  
TCACGCCACCGGCTTCTGGGGCCCCGGGGCAGAGGGACGGACGAGCTCCTGGGAGTGATGGACAGAGTTACATTTGT  
AACTCCACCCTGGGAAAGCAGCTGGGAGGAGCAGCTGGTGGCTACACGGTCCGCCCCAAGCCTCTCATCGACCTGCT  
GAGGCAGCGTTACGCCCTATCTGTTCTCCAACCTCCCTCCCCCTCCCGTGGTGGGCTGTGCCACCCGGCCGTGGA  
GCTGCTGCTCGCTCCAACGAGATCGCGCAGAGCATGACGGCCAAAACCATGAGGTTACAGGAACAACATGACGCAGGC  
TGTTTTACCATCTCAGGCTCAGCTCACCCCATCTGTCCCGTATGCTGGGCGACGCGCGGCTGGCCTCGCTGATGGC  
TGACGACATGCTGAAGCTCGGAGTGACGTGATTGGATTCTCATACCCGGTTCGTACCGAAGGGAAAAAGCCAGAATCCG  
CGTTAGATCTCAGCGGCGCACACGGACGAAGACATCGACCGCTGCGTCCGACCGCTTCGTCCAGACGGGCAGAAAAACA  
CGGAGTCATCTCCTGAGCGGGAACAACGGTCCGCAGATGACTGAACAACCTTGAAGTGTCTGCTCTTGGAGATCATG  
CTGCCTGTTACTAAAGACTATGAATGATTTTTGATGGATATACTAGTTACATTTTTAGGTCATCGGAGATTAATGTTA  
TTTTTGTGTTTGTGTTGTTGAATAAAGCACTTTTGCTAACAGGTGTAGGTGTGTATTTGAAAAAAGGGCTGTTTTAT  
TCCATATTTCCAACACTAATTTTCATGAGAAAAAGTCATATACTGTGTCTCAACATAACATCTCCTCAGTCAAAGAGCT  
GCTTTGCCTTTTTCTCAACAGATGCAACAGCAGATCTGCAATTTCTGGATAATAAAGAAAAAAGGGGAAACCGAAC  
TACCCTAAT

>Sequ21025EST2

GAAGCGAAAGTGAAGACCAGGTGGAGCAAAAGAGGAATCCAATGACCAGGGAGTGCAAAATGTCTGTGGGCTGGATG  
AGAGGCACCTTGACCCAAATCAATACTTCAAGATTGCTCACAGGCCATCCAGGACCTGAAGGGCACAGCCGGAGGACC  
CGTACCCACACAAGTACCATGTAGACTTGTGCTCATAGAGTTCATTGAGAAATTCATCATCTACAGCCTGGAGACC  
AGCTGACAGATGTTGTTCTCAATGTGTGTCAGGTGCGCTCCATGCCAAGAGGGCTTCTGGTGCCAAGCTGCTCTTCTATG  
ACCTGCGGGGTGAAGGCGTTAAGCTGCAAGTTATGGCGAECTCAAGGAGCTACAAGTCTGAGGAAGACTTTGTGGACC  
AATCAATAACAAACTGCGCCGTGGTGACATCATCGGTGTCGCGGTAACCCAGGGAAGACTAAAAAAGGGGAGTTGAG  
CATCATTTCCATTGAGATGACCCTGCTGTACCTTGTGTCACATGCTGCCCATCTCCACTTTGGCCTCAAAGACAA  
GGAAACACGATTCGCCAGCGCTACTTGGATCTGATTCTCAATGACTACGTGAGGCAAAAGTTTATAACACGCGCCAA  
AATCATCACCTACTCCGCAGCTTCCCTGGACCAGCTGGGGATTTTTGGAGATCGAGACGCCAATGATGAACATTATTC  
CTGGTGGAGCAGTGGCCGTCATTTGTTACTTACCATAATGAGCTGGATATGAACCTGTTTATGAGGATCGCCCTG  
AGCTTACCACAAGATGCTGTGGTCCGGTGAATAGACAGAGTTTATGAGATTGGTTCGTCAGTTCAGGAACGAAAGGCA  
TTGATCTTACTATAACTCTGAGTTCACCACCTGGAATTTACATAGGCAATATGCTGATTACCATGACCTGATGAAAA  
TCACAGAGAACTACTTTCAGGAATGGTGAACACATCACTGGAGGATACAAGGTGACGTATCACCTGATGGTCCGG  
AGGGACAAGCCTATGAGATTGACTTCACTCCACCATTCCAGAAGAGTGAGCATGACACACGACCTGGAGAAGATTATGG  
GAGTCAAATTTCCCTCCTACTGACAGCTACGACAGTGAAGAGACACGTAATTTCTTTGATGACCTCTGCACACAGAAAG  
GAGTTGAATGTCTCCACCCAGAACCCTGCCCCCTCCTTGACAAGCTGGTTGGAGATTTCTTTGAGGTTACCTGTA  
TCAACCCACATTCATCTGTGATCATCCTCAAATCATGAGTCCCTTAGCAAAATGGCACAGATCACAGAAAGGCCTGA  
CAGAGCGTTTTGAGCTCTTTGTGATGAAGAAGGAGTCTGCAATGTTTACTGAGTTGAATGATCCAATTAACAGAA

GAGAGCTTTTTGAGCAGCAAGCCAAGGCCAAAGCTGAGGGTGATGACGAAGCCATGTTTCATTGATGAGACCTTCTGCA  
CAGCACTGGAGTATGGTCTACCACTGCTGGCTGGGGAATGGGCATTGATCGTCTCAGCATGTTTCTGACCAACT  
CCAACAACATCAAGGAGGTGCTGCTCTTCCCAGCCATGAAGCCTGACGACAACAAAACATCAGCCGCCACAGAGGGTA  
CCTCTGTCTGATGACGTGACCTCTGCCCGTGCAGGAGTCAGTATGAAGTAGGAGCCTTTACCTCAGCTGTGGTCATCA  
GTGGAGTCTGCAGGATTTGTGTTTTATCAATGTCATTCTGTCAAAAAGTTGAATCCTTGCAGTTAAGGGAAATCATA TT  
GTCTCATTTCCAGTTGACTTTTCTTTGTTTTTCTTACACTTTTGTGCATCCTCATCAGAGACATTTTAATCCTCATT  
GTCATCCAGACAGTACATGGATGGTAGTAAATCAGGAAGTCGTGTGATCTGCTGTTGTATGCAGACCTGGATAAAATA  
TTTTCTGATTATACTTTGAGATACTACAAATGGTGTGTTGATTTGTGGCCTCCAAATAAACAGTTAATAGATCA

>Sequ21026EST2

ACATGGGGGCTCTTCTCTAGCCGGTGGGGACAGGAAGCGGACTTTGTTCCTAACTCTCCCTGTTTGGACACCAACTTGC  
GTTAGGGACAACGTTAAACCTCTGAAGTGTATTTTTTCCCCTTCCGACCCACGTCAACAGTTTAGGCTCTGAGAAGAG  
GCGTTCTTGGCGCCACCAGGTGACGATAGCCATGAAGTGGGGCTGGGTGTTTTTGGCGGTCTTCTCTCTTTGGGGAC  
CCTGTCTTGGGGGAGATGGGCTTGGAGATCCCGAGTATGACGGAAGAGACC CGCTCCATGCCCTCAGCGCCAAGAA  
CTACAAGTCCATCATGAAGAAGTATGATGTGATGGTGTACTACTACCACAAAAATGTGGACGGGAACCGCAGTGCAT  
GAAGCAGTTTTAGATAGAGGAGCTGGCTTTGGAGCTTGCAGCCCAAGTCC TGACGATCTTGTATGACGAGGACATTGG  
ATTCCGGCTGGTGGATGAAAAAAGGACACTGCTGTTGCCAAGAAGTTGGGTCTTGATGAGGTCGAGAGCATCTACAT  
CTTTGCCGAAAATGAGATAATTGAGTATGATGGAGAGCTGGCCGCCGATACCCTGGTTGAGTTCCTCTATGATGTGAT  
CGAAGAACCAGTGGAGATCATCGACAACGAGCGTGAGCTGAAGGGCTTCCAC AACACGATGAGGTCATCAAGCTGGT  
CGGCTACTTCAAGAGCGAGAGATCTCCTCACTTCATTGAGTACGATGATGCTGCTGAGGAGTTCCACCCATTCGTC AA  
ATTCATTGGCCACATTTGACCCCAAGATTGCCAAGAAGCTGAAGCTGAAGTGAATGAGGTTGATTTCTACGAGCCATT  
CATGGAGGAATCCGTCACCATTCCAGGAAAAGCCCTACATTGAGCTGAGCTGGTTGAATACATCGAACAGCACGACAG  
GCCACTCTGAGGAAGCTT GAGCCTCACAGCATGTATGAGATCTGGGAGGATGACATTGATGGAGAGCACATTGTTGC  
CTTTGCTGAGGAAGACGACCAGATGGTTTTGAATTCCTGGAATCCTGAAGGAGTGGCACGCGAGAACACTGATAA  
CCCCAACCTCAGCATCATCTGGATCGACCCTGACGATTTCCCCTTGTGTTCCATACTGGGAGAAGACCTTCCGCAT  
CGACCTCTCTTCTCCTCAGATCGGTGTGGTTGATGTTGAAGATGCCGACAGCGTCTGGATGGAAATGGATGACCAGGA  
TGACATGCCACATCTGATGAGCTGGAGCAGTGGATTGACGACGTTCTGTCTGGAAAGATTGACCAGATGATGATGA  
TGATGATGAGGATGACGATGATGATGACGATGATGATGATGATGATGATGATGATGATGATGATGATGATGATGATGATGA  
CGATGATGATGACGATGATGATGATGATGACGACGACGATGATGATGATGATGATGATGATGATGATGATGATGATGATGA  
TGATGACGACGACGATGAATAAATGTTACCACCATCTTTCACCTCACATAAATTTAGCCAGTAATGGCAAACCCAA  
AAGTAGTAGCAGTTTTTCTAACATCTCGCGGCGAACACACTGTGTTTTGTTTGCCTTCTGTATGGTTTTCTGTAAAGGA  
CAAACATAATGACCCATGAGAAAATTTTACTGTGAGTTAGGGAAGGAGATTTTCAAAGAAGCAGAGCATTTTGCATCT  
CTGTGATGAACAGCTCTCACCTCTGAGGTTTCAATGAATGTGAGCTAAGAGGCTAGCACAGGCTAACTTCCCTGAC  
ATTTTCTAACATAATGACAGACAGGGGTTACCCTCTCTGAGGAGTTACTTCCAAATTTACTGTAATCCTGTTTCAATGACA  
TGTTTTCTACCTGATGAAGAGAAGAAACGAACACTTTCTGTACTATTTCTAAAGAGATTA AACCTAAACTCACTGGA  
CAGTCTAAAATTAGTGCAATCTTGAAAGCTGCCAAATATCGGATAATAAATAAATTAACAATACAATTTGTTTTCTGC  
TCTCACATTAATAA

>Sequ21033SNP2

CCTGATAGGCCAAAAGGGATGCAGTCTCAAGATGCGGAGGGAAAGTGAAAATTTGCTTTCTGGTGGCAGTGTTCATG  
TCTGTGACAGAAATGTCTCGAACTCAACTGGGGCTACAGGGGAGATATTAAGGCACCAATGATATTTAGATGTTATT  
GCCCCGGAACATAAATGAATATACGTGGACACAATGTTTTCAGGGCCTTAAATGATTCAGATCTTATTGAATCTA  
ATCATCTCATCAATTACAGACTTAACTGAACCTCAACTAAAATTTCTCTCAATACATTTTTAATTTGTGTCCCCAAAGC  
CACTAGTCAATTATAACTCTGCAGGTTTGAATTTGCAATCTTATTTTTATTTTTTTAACTTGTCTTAGGTATGAATGC  
AGCCACTAGATGGAGTAGTCGGACACTTTCCCCTCCCATAGAGAGGGACAGCATTTTAGACCAGTCCGTTTTCAACAGA  
TCAGTATAAATCAATGACAGTGGTGTGGTGTGATGCTTCCCTCTGAGGAGTTACTGTGCTTCTTCTGCATTATAACTGTTTT  
GTAACATTTTTTTGTAGGGAAAAAACTACAGAAACAGAATGTGCCATTTCTTCTCCCTGAATGTGCAATACAAGCTG  
TTTTCTGTGAAGGTGCAACTACATTGCTGTCACTCTGTGGTCTGTAGCTCCACCTGCTCCGGTGTATAATGCCCTC  
TCCTGTGTGTGGGACTAGCACCACCTCACAGAGGTAGAGGGGCATCAGTTCAGACCTTCATCTGGATGTGGCGTGC  
TGTCTCTAGTTTTCTGGTCTGTTTTGTAATAGAATGTGCTCCTTGGCTGGCTGCAGGCTTTACAGCTCTGTGTTGTC  
TTTTTACTGTTTACTGCTATTTAACTGTCCAGTCTTCAAAGTAAAGAAAAATAATAAATAAATGAATAAAAAATCAAA  
AGAAACTGTAGCCTGCTTCTACAAAATCTTAAAGCTCTTCTGATTTGTCATATATCGTACTGTAATGTTTTATTTAAGA  
GTTTAGTGAAAAAATGTCTGCATTTAACTAAATTTAGGGAATTAATAATTAACAAAAGAT

>Sequ21053EST2, Sequ21053SNP2

GTGCAGAGAATCAAGGCCAGGGAGATCGTTCCC CGGCGAGTGTGGTGGAGGTTCCGTTGGTGACAAAAGTGCCAGCCGAC  
ATCAGGATCATCTCCATCAAAAATCTACAACCCCTGCGTGTGGACCAGTCCATTCCTCACTGGTGGAGTCCGTCAGCGTGA  
TCAAGCACACCCGATGCTGTCCCCAGACCCCGAGCTGTCAACCAGGACAAAAAGAACATGCTGTTCTCTGGCACCAAT  
ATCGCTGCTGGAAAAGCCACCCGATAGTGTAGTCAACTGGCGTCCACTGAGATCGGTAAGATTCTGTGACCAGATG  
GCTGCCACTGAGCAGGAGAGGACCCCTCTGCAGCAGAACTGGATGAGTTTGGAGAGCAGCTCTCTAAGGTCATCTCC  
CTCATCTGTGTGGCCGCTCTGGATAATCAACATTTGGTCATTTCAATGACCCCGTCCATGGAGGCTCCTGGATCCGCGGT  
GCTATCTACTATTTCAAGATTGCTGTGGCTCTGGCTGTGGCTGCCATTCCTGAAGGCCGTCAGCTGTCTCACCACC  
TGCCCTGGCTCTGGGAACGCGCCGCATGGCCAAGAGAACGCCATCGTCCAGAAGCTGCCCTCTGTGGAGACCCTGGGCT  
GCACCTCAGTCATCTGCTCCGACAAGACTGGCACCCCTCACCACCAACCAGATGTGTGTAAC TAAGATGTTTCATCATCG  
ATAAAGTGGAGGCCGACAATGTTTTCCCTCGGCGAGTTCGACATCTCTGGCTCAAAGTACACCCCTGAGGGGAGAAGTTA  
CAAAGAATAACTTGTCCGTGAAGTGCAGCAGTTTGCAGGACTGGTGGAGCTGGCTACCATCTGCGCTCTGTGCAATG  
ACTCTTCTCTGGACCACAATGAGTCCAAGGGTATTTATGAGAAAAGTGGGTGAGGCCACTGAGACAGCCCTGTGCTGTT  
TGGTGGAGAAGATGAACGTGTTCAACACTGAAGTGCCTGGTCTGTCCAAGGTGGAGAGGGCAAATACGTGCTGCACTG  
TGATCAAGCAGCTGATGAAGAAGGAATTCACCCTGGAGTTCTCCAGAGACAGGAAGTCCATGTCAGTCTACTGTTTCC

CTGCCAAGTCTGCCAAAGGCCCTGTGGGAAACAAGATGTTTGTCAAAGGTGCTCCAGAGGGTGTTCATCGAGCGCTGCG  
CCTACGTCCGCGTGGGCACCACCCGCTACCCCTGACTGGCCCGGTCAAAGACAACATCATGTCAATCATCAAGGAGT  
GGGGACAGGGCGCGACACCCTCCGCTGTTTGGCTCTGGCCACCCGTGACACACCTCTGAGGAAGGAGGAGATGAACC  
TGGAGACTCAACCAAGTTTGCAGACTATGAGACTGACTTAACCTTTGTGGGCTGTGTCCGCATGCTCGACCCTGGCT  
GTAAGGAGTTATGAGCTCCATCGAGCTGTGCAGGGCTGCTGGCATCCGTGTTCATCATGATCACTGGTGACAACAAGGG  
CACAGCTGTGGCCATCTGCCGTGCTATCGGCATCTTCAGCGAGGATGAGGATGTCACTGGCAAGGCCTACACTGGTCTG  
TGAGTTTGATGACCTCGCTCCATATGATCAGAAGAAGGCCGTGCGAAAGGCTTGTCTGCTTTGCCAGAGTGAACCGTC  
CCACAAGTCAAGATCGTTGAGTTTCTGCAAGGCTTTGATGAGATTACTGCCATGACCCGGTGTGAGTGAACGATGC  
CCCTGCCTTGA AAAAGGCGGAGATTGGCATCGCCATGGG

>Sequ21060EST2

TTTTCTTCTTTTCCGAAGACTCTGTTACTGCTAGCTCCTCCTCTTCTCCTTAGGTTCCCTCAGCTTCATCATCTGCTT  
TCTCTTCTTCTTTTCTTCTTGGGAGTCTCCTCCGCTGCTGCTGATGTTCCGCTTCTTCTCTTCTGTTACTGGT  
TCCTTTTTGGGCTTTTTTCATTTTTGACGACGGGCGTTACAGGCTCTTCTCCTCCTCCTCCTCCTTACCTCCTCAAAC  
TTCCTTTTTCTCGAGGTGGAGGGAATAGTGAATCGCCAGATGGATCGTACATTTCTTACTTCACTCTTGTGCTGGTAT  
TTGTCCGACTTCGCCATTGCTTTGCCCGTTCGCTGATTTCCGATTCCCTTCTCCTCCAGCTGCCCGCAGCCCTGGCC  
TCCAGCTTGGCCCGTCTCTGCTCCCATTTCTGCGTTTCGTGTCTCTCCTCCAGGGCGTCATAGCGAATAGCCAGGGAC  
GCTTTAGCTGCCAGCATCCTGGAGATCTTGCCTTGTCTTGGCAGTGGTCTGACCCACTAGAGAGGCGTGGTATATG  
AGACCGTACTTGGGCGTGTCTTTGCCGGTCTTCAGGGCTCTAAACAGAGCTTTTCTGACCCGAGGATCTGCACTGTG  
GAGGCTGGATGCTTCGCCAGATTGAGGAGAGAACCAGGCGATGTGAGATGAGACGGGCGCCGACCGACTCGCCACCATT  
ACTGTCAGGTTGGGGCGATCGCCATCATTCGGTTCTTCAGGTAGTCGTAGAGCTGAGCGCGGTAGTCTGTAATCTCAA  
TCACCTGATCACACAGGTGCCTGATGTTGCCGATGTCCTGCTCCGACACTTCTGTTCCCATGGAGATCTCAGCGGCCA  
GTTTGACCTCCGCTCGATTTCTCTGGGAGGAGGTCTGACAGATCAGAGCTGGACACGTTTCGTGCGGTACCAATCT  
TGCGGACGGTTTTGTCAGTAAGCCAAGTTGTCTGTGACGACTTTCGCGAGCTCAGGGAAGTGCAGCCGTACCACTCCC  
TGCAGCGCATAATGTAGTTGTTGAGCTCCTTATCCAGGTCGTCCAGAAGAGAAATGGCCTGCACAATCATAGTGTCCA  
CCTTGTCTGGACTGAACTTCAGCTTGTAGCTGTGATAAACTGTGAGCCAACCCCAACGACATGGCACTGATCTCCTGG  
GTGGAAGTCCAGTGATGAGACTCTCCATCTGGCTCCTGATGCATCTCATCAGTTCAGCCACAGCGGTGTTGTGGACAC  
AGTCCAGGTCAGCTTTTCTTTGATAACTCCGCCGAGTTTTGTCATCGCTGATTGCCAGCTGCTCATGAGCCCTCTTGG  
CAACGACCTTCTTCAGCGCTTTCTTCAAACCTCTTGCCAATTTTTTCCCTCAACAAGGGCAGTGGCAGCTGCTAAGGCCT  
CTGTTGTGTCTGAACTTCTCAAAGTGTCTCAGCTTCACAATCTTGTTCGCTTTTCAGGAGTTTCAAACCTCCTTGT  
ACAGGCTGTGACCTGTTGTCAGCTTGGATTTCATCGAGGACCTTGAATATCGCATAACCAGCGCGGTCTCAAATAACA  
CGAGCATTTTTGTCAGCGGCTCGGTTATCTGGTAAAGTTTAAAGTTGTCTCTACGTAGGGAGCGATCACGTCTCTCAA  
ACTCACACGCTTCTTCTCACTCTGTCTC

>Sequ21065EST2

CCACGGTGGCTGAACAAGTGAAGAAATCATGAATCATCAGTGAGGGCCTTAAGTCAAGCTTAGATTGTTTATAACAG  
ACGATTTGAATTTGTAGTGTGTTGCCACAGTAATTTCCCTTGGAAATAGCTATATTTGTAGTAAAATATTTAAGTTGTT  
TGAATTAACGTTGAAAAGCTGTTGGCCTATTTCTTGGGCTTTGACATTTAGCTAGCTAAACCTACCAAGCTCAGTTAAA  
TTGTTTAAACACTTTTGTGAAAGATGGCTGACAACGGGACACACCCGGCTGAAGAGGATCCAGCTGCAGCTTTCTTGGC  
TCAACAAGAGATGAGATAGCGGGGATAGAGAACGACGGC GAAGGATTTGGGGCGCTGGAAGGAGCGGACCGCCAGCA  
GCCGGCTCAACCGCAGTCCGCCAACTATGATGGTTTCGAGGACGAGTCTGCCACAGTGAATGGGGATATGTTTCAGGA  
GTCCAATGGCCCAACAGACAGCTATGCAGCCATAGCCAGGTGGATATTCAGAGACAAGAGCCAGAGAGTTTACGCAA  
GTGGAGGGAGGAGCAAAAGGCACGCCTTGAAGCATTAGATTCGGCATCCAAGCGCGCAGAGG CAGAGTGGAAAGAGAA  
AGCCAAAAGGAGCTGGAGGACTGGCATGTGCACCAGAATGAGCAGATGGAAAAGAACAAGGCCAACACAGAGCATC  
AGAGGAGGCTTTCCCTGGCAGAGAGTGTGGCGACAGCCAGGATCTGAATGGGAGAGAGTTGCCCGTCTGTGTGACTT  
CAATCCCAAAAACCAAAACAGGCAAAAGGATGTTTCTCGAATGCGTTTCTGCTCATCTCTCAAACAGACGCCTCT  
AGTTCGCTAAAGGAGGCCGAGGGAGAATTTCTGTTCTAGAAACATTTGCCCTTTTCAGTTTTAACCTCACGTACATCA  
GATGAGTTTGTATGACCTTTTCCATAATATTTCTGGTATGTTTATAACCTTTGAAAACCTCCCGCTTTCTTGTATGCC  
TGTTACAATTAATAATACACTTAACCTCACTTTCTTGTGAGAAGATGAAGGACTGCTCTATTGTTACGACATCCTTT  
AGCTGGTCAAACCTGACTGCTATACATAAGAAAATATTTGTTACTGTAAGTTAAACATATTTCTTCCCTTAACTTATA  
AATGTTATTTGGTCAACTTTATTGCATGCCTTTGGCAATATTTGGATGCACAATTTTGTAGTTGTTTTATAAATTAG  
CATTTTGGTCAATGTCAAACACTTCACATATGTTATGAGCACTGTTAAGGATTAGATTGAACCACTTATGCCTCTCA  
ATGTAATAATTCATAACAAATTTCTTTGTTTACATTTGTTGATTATAGCCCTAATGACCATATTTAAGGTAGCTAGC  
ATATTTTCTCTTTTCGCGCACATAAGCTTGTGGCCTTGTAAATCTCGCTTACTCCACTTTGAGTATTTAGCCAGAT  
GGATTTCTCTTCAATTAGGCACGATTTTCAGCAACAACAAAACGAAAATCACAACCAAAGATTTTCATCTAAATTTTCT  
GAGTTCACATGATTAACAGCTTGTGCAATTTCTCAATTTCACTGGTCTCTCAGCAAAATGTTTTATGCACCATTTTGTG  
TCACACTAAATGTGTTTTATATTTTTTAAAATGGCAATCAATAAGGTGTCAGTTTCAGCAATTAATGTCTGCACATTTG  
TCACATGTTGCCATATTTGGACATTAACGAATACTGCAAAAAGTGAATGTTAAAAGGGAAGTGGAAAATAAAAACAATGGA  
GTATGATCACCTAAATTAATTTGTCCTTAAATATTTACCAGGTAAGACTGTTGCCATCAAAAATACTCTGGAGATAATC  
ACTTGAATCCCAGTTTGTCCAGCTGATGTATGAGGAGCTAAAATTTATGCTGACCCAGTGCAGCATCCATCATTACA  
CTTTTAAATGCTACTGTTAGAGGATTTTACCCACAATTTTTATCATTCAAATGTTAAAACACAGATGAGCGTGGAAAGT  
CCATGAAGTAAGAATATGTTTGCAGGTACACAGTAGCAAAATAGTGTCTACTTCTTATTTCTATGAATGCATGATTCAGA  
TTTGTGTTTTACAAGTGTACCCTTAATGGGCGACCAAAAATGCCCTTGCATAGGCAAAGTGGTTTTACAAAAGTGTCTG  
TTCCAATCTGTAACCAACACTTTGAAGCCCTCCTTAATCAATGATTTTTAGGTGACATAAAAAGTCAGAGTTTTAAGGTG  
ACATTTGAGACTGGGTCAGTCTTTGTCTAAAATCCTCCTCCCATTTCAATCTACTCACCCAGCCATTAATATACAAAG  
TGTGTTCAATAAACTTCCCGGTGATTTTTTTTTAAATAACTTGTTTAATAAAGGTTGTAATAAGAAAAAAAAAAAAA  
CCGACTACCCTAT

>Sequ21069EST2

ATTCAGCGGACTGTCGCGGCATTTGAAACATCTACATCTCAAGCTGCAAAATACTGTCACTTTACGCCGAAATTACC

GCCTTTAGAGTGAAGTAAATGATCGATATGATCGAGAAGGAGGACCCGGTCATCAGCGAGGAAGAGGCGGCACAGTA  
CGACCGCCAGATTTCGACTATGGGGGCTTGATGCCAGAAAGAGGTTACGAGGATCCCCTGTTCTCTTGGCAGGTTTAGG  
TGGTCTTGGGGCTGAAGTAGCCAAAAACCTAATCTTGGCTGGGGTTAAAGGACTCACTTGTGATCATGAACAGGT  
GTCAGAGGAGTCAAGCCGAGCTCAATTCTTGGTTCAGTGGACTCAGGGTCAAGAACCGGGCCAGGCCTCTCTGGA  
GCGCGCACAGAACCTCAACCCGATGGTTGAGGTTTCATGCCGACACAGACAGAGTCAAGAACAAACAGATGACTTCTT  
TCTGCAGTTCGATGCAGTGTGTCTGACAGGCTGCTCCAGAGACCTGATGGTGCAGGTCGACCAGCTCTGTTCTCAGCG  
CAACATCAAGGCTTCTGTGGAGACGTCCATGGTTACTATGGTTACATGTTCTGCAACCTCGGACAAGAACAACACTA  
TGTGAGGAGAAACCCAAAGTAGTGAACCCGACTGGAGATTCCTAACGACGGCCAGAGGCAAAGAAAGCCAAAGTTGA  
CCCCAACGAGACCACCATGGTGAAGAACGACGACCAGTTTCTGCACCCTGAAGGAGGCTCTGGAGGTTGACTGGACAAG  
TGAGAAAGCCAAAGCTGGTCTGAAGCGAACACCAGTGGACTACTTCCCTGCTTACGTAAGTGTGAAAGTTTCGCACAGA  
CAAGGGCCGTGACCCCGACCCACAGTCTTTGACAGGAGACAGTCCAGTCTCTGAAACAGATCCGCGATGACGTCCTCGA  
GGCCTTGGCAGTCAAGTGCACCTCCTGAACGATGACTTCATCAGTACTGCTTCTCTGAGATGTCTCCAGTGTGCGC  
CGTCATGGGAGGAGTCTTGGGACAGGAAGTTGTCAAGGCTCTCTCCCAAAGAGACCCTCCCCACAGGAACCTTCTTCTT  
CTTCGATGGCCGTAAGGCAACGGCGTGGTGCAGTACTTTGGACCAAACCTAAACACCTGTGCGACCTGTTTTACACAC  
AAAGTCCAGAAAGCTTTTCTCTTTGCCTCAGTTTGTTCAGTCAAGTATTTATACCAGAACTTGTCTCCACTAGTCATA  
AAATCCATCTGTTGTTCTTCTTGTCTTTGTCATTTGATCATTTTCCACCAGTCAAACACTTTCTTGGGCAAACAGT  
GAGATTTTTTTTACATTTTGTCTAATAAAACATTGTTTAAAGTAAAAAACCAGAACCTCCCTA

>Sequ21083EST2

GAGTGTACAAGAAGTAAACATGAAATGAGTCTCGGCGGCGCAGTGAATTAAGGAACAAATTTGGTCTTATTATAGTAAA  
AATGGATCGTTTTTTCGTTGCTCAAAATGGGCTTTTGAATAAAATGAAACCTTTAGTGATCCAGCAACGAGGTGTGAGACT  
GTATGACGGAGATGATAAGGCTAAGCTGGATGTTGGAGTGTCTGTTGAGCACCCATCGGTTGATCTGGAGACAGT  
TAAAAATCATGAATGCTGCATAGCCATGCCCTGTACAGATCATCTTCTTTGAGGAGCAGGCTGCAGGAATAGGAAA  
GAGTGCAAAAAATCGTTATTACCTGCATCCAGTGCCTGCCAACAAGGAGCCTGGTCTCTACCAACACAGCAAATACTC  
CTACATTAACCTGCTTCAAAGAACATGGGCAGATAGAGTTTTACAGGAGGCTAACAGAAGAGATGACTCAGAAAAAG  
ATGGGAGAGTACACCAGTTTACAAACCCATCCCCACAGGAACCTGGCTCTCAGGCAGGAAAGACACGTTGCTGTGGGAT  
TGTGGCATCGAGAGAAAGATAGAGGAGAGGAGAAAAGAAACAGACAAAAACATTTAGAGGCCCTTTGAGGACCTCAG  
TAAACTGATGGTGAAGGCCAAAGAGATGGTGGAGTGTCCAGATCTATAGCCAACAAGATCAAAGACAAGCAGGGAGA  
TATAACAGAAGATGAGACAATCCGGTTTAAAGTCTACCTGCTGAGTATGGGTATTGCTAACCCAGTTACAAGGAAAC  
GCATGGATCAGGCACACATTACCACATGCAGCTGGCTAAGCAACTGGGAGATATGCTACAGGCCCTCTCGAGGAGCG  
TGGGGGTATGATGGCTCTGACTGAGGTGTACTGTCTCGTCAACCGTGTAGAGGGATGGAGCTTTTGTCTCCAGAAGA  
TTTGGTAAACGCATGCAAGATGTTTGAAGTCTGTTGAAAGTCCCCTGAGGCTGCGCGTGTTTGACAGTGGTGTGATGGT  
GGTCCAGTGCAGTCTCACAGCGAGGAGGAAATGATAGCTCAGCCTGGACAACGTTGCTCAGACAAAGGCTCCTTGAC  
AGCAGAGGAGTTTGCACAGCTCTTGGTCTCTCTGTTCTTCTGTCGAAAGAGCGGTTGTTGCTGGCTGAGAAGATGGG  
CCACCTGTGTAGAGATGACTCTGTTGAGGGCTTGCATTCTACCCAAACCTCTTTTACCTGTTTACACTCTTACACT  
TTACTCAGTATTTCTGAGATAGAGGAAAATAAACTGGGCCACACTGTCTCTTCCGCTAGACGGATGCATTAACCATG  
TTCTGACCTCTACATGTATATACTGTTGTACAGCAGTAGAGTGCATCCTGTAAGTTCGTTGCTATCCAGTGCATCATTGA  
ATGGTTAATGTTCTGGTGGTGGTACATCCTTCATCCACTGTACGTACCACCTGCTATTTTTCTATCTAGGTCTTTAAAA  
TGTGCTGCAGACTGCAAACTGTTTACGCAATAAAATGTTCCAGGTTTACTCAACTTAGTGTGTCAATTAGTAATA  
AATGGGTTTTGGGAAAATTGACTTAATGGGATGATAAAGAGTCTATTTTTTTCACGGCTTTTCAATTTGAAATTTGTTATGA  
AAATCCATAGCCACTAATCACATTTTTCCAAAGTAAATGTATATAATAAATGATTAAGGAATAAAGCTCTGCCCTGCT  
ATC

>Sequ21104EST2

GACGAACTTCAAAGCTCAGTCCACACTTTACAACCGTCGGATTTATGTCTTTATACCGAGTGATGCTGTGAGGGAAA  
GCAGCGCAGTGTCTGCGGGTGAACCTCTAAACCTTTGCGGGAAGATGAGCTTCAGTTCGTAGCCGACGGTTCGAAAC  
TAGAGCTTCTCTGTTCTCTGTTTGTGAAGTGCCTGTGAATTCAGTCAAGGCTCGCGGCTGCATCTGCTGCGTAAA  
TACATGCTCTTTCTCTCAACCTGCTCTTCTGGCTGGGTGGGTGCGGGTTGCTCGGTTGCTGGCTGTGCGGTT  
TCCCAGAGCAGCTCGCCACCCTGTGCCCCTCTTCCCGTGCCTCTCCGCCGCAACCTCATCATCACACTCGGCACC  
GTTGTATGGTGCAGGGCTTCTGGGCTGCCTGGGTGCCATCAAGGAGAACAAAGTGCCTGCTGCTGAGCTTCTTATC  
GTTCTGTTGATCATCTTGGCCGAACCTCCTCTCTCACTGTTTTCGTTCCACACCGCAAGGAGTGCAGGCAAAAC  
GCCAGCGGACTTGAAGAAAGGTTGGTCTGTACTACCGATAACAACCGCGGCTGAAGGATCGTGGAAACACC  
ATACAGGGAGAGTGGAGATGTTGTGGAGTGTGAACCAACGACTGGTACACCGCCCTGCAGGATCACGTTGTTCCC  
GACCGCTGCTGCCAGCAGATTTACCCGGGCTGCGGCCGCAACGCTCCAACGCTTCTGGACACGGGGTTGCTATGAG  
AAGGTGGAGGAGTGGCTGGATGACAACAACACCTCCTGGGAACCATCGTATGTGTGTGTTGGTGCATACAGCTCCTG  
GGTATGGCTTTTCCATGACGCTTTACCAACAGATCCACCGGGCAGGGAAGTACGAAGCCTGATGGTCTGTTTCAA  
ACTGTTTAAATCGGGTACATAAAATATAACCTCTGTCAATGCTTACTCTTACCTATTGTTTATAGTCAGAATA  
AGTCAGTTATCGTGTGTGTGCCACTACAGCCTTTTTTATAATGTTTTTTCATCAGTTATTGTTGTAATAGCATTGGAACT  
AGTTTTTCTTATGGTTAATTGTTTGTTTTTTTTT

>Sequ21110EST2

ACTTTAAATGTTTGTCTTGCAGAAATTTATCAGTACATTCGATGCCTCTGTTCCCTAGTATGGCTCCACGGACAATCTCA  
GCCAAATGGAGGCGAAAGCTCCTCAGCTAAATACTAACTTTGGTTAGAAGGTTCTGTGACATATTTTACCCCACTGC  
CATTCTGGAAGATAGCAGTGGTGCAGCATGGCGTTGAAGGAAATGAAAAGCACACCCTGTCTGACATCCCCAGCAAGC  
CTCCCTTACATACCCATGGACCTTTACAGCCTCTCACCCGGTGGAGCATTTGACAGTGGCAAACACAATCTGACGGCTG  
AAATGCCAGACTCAGATTCAGGAATCTCTTCAAACACAAGTCCGAATGCTAGTTCACCTGCAAAATCTGCATATGGAG  
ATGGGCTTTTTGTTTACAGTGAATTCAGACATGGAGGAGATGGACCACAACCTGGAAGTGCAGGAGTCTGAATACTCAG  
AGATGTTCTCGCTAAATTTCAAACCTGATGATCCAGTTTCTGATTCGGCACCAATAGGGCAGCAACAACGGCAACAGG  
GGAAGAAACCCAAACATCACAGGACGGACCCATCAGAGGAGAGTGGCCACAACAACGCTCCCTTACCAAGACAAGC  
AGAAGAGACGCTCCGCTTGCCTTCCCCAGAGACAGAGGGCTAAGGCCCTCAAAATCCCTTTCACTGTTGACA





GAGCATTATGGGAATTGGTCCCGTTCCAGCTATCACAGAAGCTCTAAAAAGCCGGCCTGACTCTCAACGACATGGA  
TGTAGTTGAGGTGAATGAGGCTTTTGCCTCTCAGTACCTGGCTGTTCGCTAAGGCCCTCGGACTGGACCCAGAGAAAAG  
CAACGTTAATGGTGGCGCTATTGCCATAGGACATCCTCTCGGTGCTTCTGGAGCACGCATCACTGCTCACCTGGTTCA  
TGAGTCCAGGCGACGAGGCAAGTACGCTGTTGGCTCTGCCTCGCATCGGCGGTGGTCAGGGTATCGCCATTGTTCT  
CGAGAAATACTGACTGAAGAACTGCCAGTATCGGATGAATTCCTGTGGAAGAAATGTCCACACTCACATGAAATAGA  
ATTAAGTTGACACGTGTTAAAAAGAGAATTTTTTCTGCTTACTCTTGTGCTTATTTTACAGCTATTTATACAAAAATA  
CACACTAAATGTTTCAAGGTTTGCCTTGGGAGCCCTGTTAAGATAAAGAGCTAACTCATGTTTCTGATCTTTGT  
CCCAGAGTACAGCAAGAGTCTGTTTCTGTGTGTGCCTGAAATACAGTGGTAGCTCCTTGGTACATTAACCCATGTAG  
CAAATTATTAACATATAAGTACAGTTTTTTGTGGGTTATAGCGAGGTTTACAGGAACTCTGAAATATGATGTTTGC  
CTTAAAATGCTCTCTATCACGCCTTATCAGGGATTAGTACTGTGATGGCTCCCGCAAAAGACTGATTTTGTATTTCT  
ATGTCAGAGAACTCAATAAATTTGCATATTTTAAACGTAAAAA

>Sequ21126SNP2

TTGACATCTGAATTAGCAATAATGATTTTTTTCATTGTTTCATTGTTGTGATCGTTGACAACGTTGGAAAACAGTCGTAA  
ACATTAGCAAAAAGAAATTAGTAATAGTTGTCACCTCACGTAGCTGTAAAGTGTTTTTTAAAGCCTCTTTTAGCTCCTCA  
ACAGTGTTTTTCTGCCCTTTTCTTATTAATCACATTAAGAGTCTGGTTAAGGTTGGCAGTTAAAGAGCTTAGGTT  
AGTTATTGTTTATTTTAGTAGGTAATAATAGTTTTCATGTTAGGTAACCGTCTTTCAGTAACTAACCAGTTGTTAGTTGG  
ACAATGAGACTAAATGTAAACAGTGTACAGACGTAGAAAAATCCCGATAAACAAAAGAAAATCTGAAAGAGCTGAAGAT  
AAAAGACAAGATAAAGTATTCCAAACTTTACCCTAAATCTGATAAAGAAATTCGTGTTGAGAGTTTTTATTTTTTAT  
TTCAGATATTTTCTATTTTATTTCCAGTTTCCAGGACAATATCTGACATTTTATCTTGAATCTTCTCAGTTTGGTGTCT  
GAGACTAAAAGTTTTTGTGATCGTTATTGAAAATATTGAAGCTGAAGCCGTGTCTGTGTTTCCCGCCAACTGAGC  
CACATGGTAACCTCATTTCATCCAGTGTACGTCAATTTTTATTGTAACCTGTGTCTCTATGACTTCTGTAAACCCGAGTC  
TTCCATCCATAACTGTAGATTAGACAATCGATTAGGTGATAAGTAGCTTAATGAACTAGTAGCTGTGTTAACGATAGT  
AACGACCCTCGGGGCCGACGTTAACGAGCCACCGGCCAAAGACTCTGCGGAGTCGATGATGAAAGAGTTAACTCTGG  
GCCCGATGATGTCGCTGTGTTTTCATTGACCTTTGACCCCTGCGAGGTTCTCCATGCTGTAAACCACTGTGATCACT  
GTGCTCGTTACCAACGACTAAACCAATGGCAATAAAACCAGCGTCATGAACAAAAACAAAAAACCAGAAC  
TACCT

>Sequ21147EST2

CACATTGACTCCGACACTGGCTTAGACGCGCTCTGGGTA AAAAGAGGCATAGGCGCAGGACCTCCAAGAAGAAGCGC  
AACTGGAAGCCTTATTACAAACTTCTGGGAGGAGAGGAAAGCCCTGGAAGAGAGAGACGGCCAGGGCTTCCCGAT  
TGAGAGAGGAGATGTTTGCCAAAGGGCTCCAGTGGCCCCCTATAACACCACACAGTTCTGATGGACGAGCATGACC  
GGGAGGAGCCGACCTGAACACCGAGACCGGGGTGAGGCGCCCTCGGGGTAGGACGTCGCATGGAGGACACTGGCA  
CGGAGGAGACCTCTTCGACAATGAAGAGGAGGACGATGATGACCGCAGCGCGGAGGCAGCGATGGTATCGGGAGGC  
CCGGAAACGCAGGTGGGAGTTTCTCCAGAGAGTACTTTCCGAGACCTACGAGATGTATCACGTAGAGAGCCTGCAG  
AATATGACCAAGCAGGAGCTGGTGCAGGAGTACCTGGAGCTGGAGAAGTGTATGTCGCGCTGGAGGAGGAAAACAAC  
CGGCTGAGGCGCGCTGGAGCCCGGGGTCTGACCGTGGAGAGCTCCCTGGTCCGGCTCAGAGAGCTGGAGAGGGAA  
CTGGAGAGACTGAGGGCCAAAACACGGAGCTCCTTCTGCAGAGCCAGCCGAGCAAGGACAGGGCCAGGTGCTTACC  
AATAGAGGACACCAGTCAAGTTGGGAAAACCCCTTTGAAAGAGGTA AAAACACGGGACTACTGCATTTTTAAAAA  
AATGTCATAAATTTTTTGTAAACCAGTTTGTATCTGGACGATGAAGTCCCTTGCATTGCAATGCAATACTTGACGTTTT  
TTTTCTATTTGGACTGTAAGGTTGTCTGTTCAATTTTTTTTCCAAGAAGAAATGTAATAATTTCAAATAAGATTCTT  
TTTATAAGAGAAATGATTTGACAAAACAAGAATATTTTGTTCCTGGTCAACTTCGTATGTGTCCATTTAAATAAT  
ACTGTTTAAATTTTGAATTTAAAAACAACATTGTATGTTGACCCCTCCCGCCCCCGAAGAAACAACCAACAA  
ACAAACAGAATGAATAACAAATTACCGTTAATTGGGGCAGCTTGCAAGACTGTTTTGCAGAAGTAAATTCAGAGT  
GAACATTTAACAGTTGTGTGTTAACATAAGTTCAAATAAATTTTGAAT

>Sequ21165SNP2

CAGCACGAAGCTCTCACACAAGAATTATTACTGATCCACTGCTTTATTTAATTAGCAGTGACGTTTGGACTTCATT  
TAAACTCGTGGTTTTCTGATGATTGTTTCTTCAATAAGACACATCAGGAATTA AACTGATGGTGTGTGATTTAAAT  
TATTTACTGTCGACGGTAATAGATGATATTTTCCAGCAGCAACCAGCTCATAAGGTTCTGTTTTATTTAATGAGGGA  
ATCAGTTACAAAGTGTGAATCCTACTGAAACACATGACGCTCTGAGTTCATCATATCTCAAGTGTACCACATGATCA  
GGCTGCTCCAGCTTTAATTTATTCTTTTCCATGATCCGCTCAGCAGCTCAAATATCAGGGTTTTTATTTCTAATA  
TCCTTTTTCTTGTGACACTTTTCCAGGCGTGTTCATGTTTTTATGTGTGTGCTCTAGTGTGAGTTTCAAGTAGGGAAA  
ATAACTAACTATGAAATGTTTACCTGCAAAAAGTGAACAAATAAAAGAAAAATAACTCATCAGCAGCTGGTAGAGACAC  
AGATTTACAATAAACACCTGATTTTAGGACAAATCACGGGTGAGTGGAGGACCACTGACTGACCTGAAAGTGT  
GAGTTTTGAGAATTCAGACGTTTTTCACTGCCTCGTTTTCTCGGCCTTTTTATGTGCAAAAATGATGTGTGTTTTTT  
CAGGCATGTGAGGATCTGCTGTTAACTCGTCTGTTCTGGCTTTTTCTCGTGTTTTGCACCTCGCCCTGTGTGAAGAATA  
TCTGCCTTAAAGTATGCAAGTGAAGTGCATACATATGTTTGGATGACTGATGTTTGCCTTTGAGTATTTTATTTTTGTT  
TGCTGTCTAAT

>Sequ21169EST2

ATGGGGAGAGTTGTTGTCGGAGAGGGAGGAGGAAGGCTCAGAGTAGACAGAAGGGAGAGCTAGAGTGGGAATTAATAG  
CACATTAAGTAGGAGGAAATATAAATTTAGCATGGCATCGGGGACACCCTGTACATAGAAACGGATGGGTGAGAAA  
TGCCAGCCGAAATAGTGAAGTGCACGAAATCGAAGTAGAGACAATCGAGACAACAGTTGTTGGAGACGACGGTGAAC  
ACCAGCCTATGATCGCTTTACAGCCTCTTGACACGGATGATCCGAACCTCGATTCACCCGACCCAGGAGGTGATATTGG  
TGCAAAAACAAGAGAAGAGGTTGGTGGGCGAGGATGACTCTGAACTGCACACAGATGACGGTTTTCGAGGACCAAATCCTC  
ATCCCAGTGCCCGCGTGGAAAGAGGACTATATCGAACAGACTCTGGTTACTGTCGCTGGGAAAAGCTCATCGACAGGC  
CGGATGAAGAAGGCTGGAAAGCGGAAAGAAAGCCGGCAAGAGCTACCTAAGCGGCGGAGGCTGGTGGAAAGAAAATGG  
GAACAGAAGCAGGTGCAATAAAGACACTGGAGGGGAGTTTTCTGTTACAATGTGGGCATCGGACATTGACCATGAG  
TCAGTGGTGGAAAGACGATCGTCGGGAGAACTCCCTCCAGATTACTCCGAGTACATGACAGGGAAGAAGTTGCC

CCTGGTGGCATCCCGGGGATCGACCTATCAGACCCCAAACAGCTGGCTGAATTTGCCAGAATGAAGCCCAGGAAAGTC  
AAAGAGGACGATGCTCCCCGGACGATAGCTTGCCTCGTAAAGGCTGCACAAAGATGTTTCAGGGATAACTCAGCCATG  
AGGAAGCATCTCCACACCCACGGACCCCGTGTTCACGTCTGCGCCGAATGCGGCAAGGCCCTTTGTGAGAGCTCC

>Sequ21193SNP2

ACTAGTAGGGTAGGTTCCGGTTTTTTTTTTTTTAATTATTATTATGGTTTTATTACTCATCACAAATGTCATTATCATCA  
TCAATTAATACATCAGTTGTAGATCCGAAGGAATGAATTCATTAGCTATGATTTTATTTTCACTTTTCGCCAGAGAG  
AACTGACATGTAAACTTAAAAACACAACAGACATTAACCGCATGGGAGGAAAGAAAACAGCTGAAATGCTTTTGTGAT  
GTTTGCATCAGTAGGGTCATTCCTAATCAACTGAAATCAAGAGCGATGATTTTCAGGATCAATGCAGAAATGCACTAAA  
GGACCTGATAGAAGTGGATTTCTTGATTCGTCTCAATATTGCAGAGCTAAGTGCCGATTCACAGGAGGAAATCACA  
AGCTAGCAGGAGATGAATTCGATCATCGCGACATCTCGAGCACCTCTGAACAATGAGAGAAATGATGTTATTTTCAAG  
ACATGAGCTGCGAGGACGATTTGCTCATAAAGTATTGTAGTCCACGGGCTGAAAGTGTGCTCAGAAGAAAAAAAAA  
ACCTAACCGAAGCAGAAATTCATTTTTCCCATGGTACCCATGTGATCATACAATCAGAGGAGAAATCAGTGCTGCT  
GTCACCACACACTATCAGTCATGATGGAGGAAGGTTTGCATAGATGTGTTTCAGATTTCCCTCACTAACACTACACT  
AATCTGTGCCATGAGATGCACTGGCGTCAAGATAGAGGAGGGAGTGAGTGTGATATTTATACATTTCAATGACAGC  
CATGTAAGACTTGAAATAAGTGA AAAACAGTACTATGGGAGGACATGTTGGCTACAATTACACGCAAGTCCCTCTA  
ATCCTTTAACTATGAAAACAGTACAGTTAAAGAGCATCAATGTTTTTTTTGCCATCAAAATAGTTTTACGCTAACTACT  
GGCACTATTCATCAT

>Sequ21204SNP2

GGTAGGTCGGTTTTTTTTTTTTTAGTTAGTAAGTAATTTATATTAATAAATGTAAGTACATGAACAGGTTTGGCTCCATAA  
TGAATCATCTCAAAATGAATCAAACAAACCACTTCTACACATCTGTTCTGTGCAAAAAGCCCACTGAAAACAAATCATA  
TTTTTATTTCCCTTCGCGTTTTAGAGATAGCAAATGAAGAAAGAGGTTTCATATGAATTAATAACAGGGTGTCTGGC  
AATAAATCTTTGACTTCATTGTTATGACTTCTCAAACAACAGCATTAAAGTGAAGATAACAGCACAAAAATGGAACC  
ACAAGCAGCAAATATCTTTACGTCGAATGAAAATATAGCTCACTCTTAATTTATGCAGTTTCATGTGAGTAGTTCTAG  
GGAACTAATACCAAATATGTTTAGAATAAACATACAGCGGTGAAGACATACAGCTGGAGCTATAACCTCAGAAGAGA  
CTCGTTTCACTTGATTCAGGACTTTAGGGAGCGGCACAGGTTTGAGATAGGCTACGTGCTCTTTTAACTCTCACTT  
AGGAGCTGATCACGTGGCGTGAGATCAACTTTTTGGTGGCACTCGTCTGCGAGGACGGGCTTCAAAGTCTTAATCACA  
GCAGTCAGGTTGGGTTTCTCATCCGTCATCTCTCGACTGCTTGCATCCTTCACTGGAAGTCTCCTCAGTTGGAAC  
CTTCTGGTCTCCTGTCATCCCTTGGGTCCAGATCCAGAAACGGGTCACGTTTCTTGGGCGTCTCCTCAGCTGGACG  
TCCCTTAGTGAATTTGTTGGTTCGGCACTGGATTGTTTGGGAATTCCTTTTGTGTTGAGCTGCATCTGAGGCTCTGGCT  
GCTCTGTCTGGTGTGCTGATTTTCAGGCAAGGCGCTCAGGTCGTTGAGGGTGGGACAAGCCCATGCTCCTGCAAGAGTT  
CTAGGGCGGTTATGTACCCAGCATCTGAAGTAAACAGGAGGACAGGTTTAGGGTGTCTCATACAGTCTGCATCAGC  
TCTTTTTGCTCCTTCAGTTTGTCTGTTTTTGTCTCCTCCTCCTCACCTGCTGACGCTGACAGATTCTGGTTAA  
AATATTGGTCAACCACATCCTGGGCCCTGGCAGCTCAAAGTGGTAGCCCATCTTCAAAAAGGGT

>Sequ21258SNP3

GCCAAATCAGAGCTGACCAGGAAGGAGTGCACCCATTGCAATAACACGAAAAGTTCTCTTCTTATAAATTCAGTGACC  
CGCTCAGAGCTCCTCGTCTCTTTTCCAGAATCTTGTGGGCGGAAACTTTAGGAACGTTTCAGAGTAAAAGATGGG  
ATACATGATGGTAGAGGAGCACAGCTCCACTCTGCTCCACCTGAAGAGGTCCTCCAGGTCCTCGGTCCTGGTCCCTCCT  
GGTCCGTTATAGTGTGACTTTGGGTTGGCAGCTGCGTACTACAGCTCAGACAGCGTCTGTGGAAACTCTTCTACGTCAC  
CGGCTGTCTGTTTGTGGCCATGCAGAACATGGAGGAATGGGAGGATGCCATCTTCGACAAGACCAGGAACCTGATCGA  
GCTCAAGACCATGAGTCTGTACGCTTCACTCCTGACTCTGTGGAGGAAGGGCCAGGAGAAAATCGTGTGACTTGAC  
TCAGTGTGTGACGCTCTGCGTCCAGGAGGAGAGGGTCCGGTACCTGGGGAAGGGTTACCTGCTGATGCTGCGTTTGGC  
CGCAGGCTTCTCTACCCCTCACTCAGAGCGCCACGCTGGGAGGACGCAGTGTGAGGCGGTGGCCGCTCTGCT  
GAAGCGTTTTCTGGGCTGGAGGAGCAGCATCTCAGGCAACAGGAGGAAAGACTATGGAGAGGAGGAAGACTCTCT  
GGACAACAGCAGCGATGAAGCTGATGAAGCTGATGAAGCTGATGAAGCTGATGAACCTGAGACCTGTAAGTGTAGCT  
GTGAGTGGATTGAGTTGAGGCATTATGACTGAGGCTTTAGAGGGCGTGGCTTCAGTGTGACTTCAATTACATGTTATA  
CAGAAAGCATGTGATGTGACACTGAGGGTGTAGGCTTTTTAAATGGCTCCTTACACACTTCTTCTGTTGTTTCTAT  
CTGAGTTCAAGTTATAACAATGAAACATTTTGAACAAGGATGAAACATCTCCTCTTACGATCTGGAGACAGAGACT  
GAAGCTCATCAGTCTAATGACTGTGTGAGGATCCAGATCCACATTAAGTATTAAGTGTGCTTTTACTCAACTAA  
TGACTGTTTATGTGAAGCTGTCCACGTTCTTGAGCCACCCCACTAGCTGACGCTCGTCTATTCTAGACTGTAA  
ACTGTTTTCAGACATGAAGGGCGAGATGAGACGAACCTTTCAGCTGCTCTGCTCTCAACATGTTAAATATGAACAAA  
GACCGAGTCTCAGAAAACACTTTGGTCCAAGTTTTATCCGTTTATGTAAGTGTGTTGTTGTTGTAAGTGAATCAGG  
CTGATGACAAATG

>Sequ21265EST2

CAACAGTACAGACTGATGAAAAGTGGCCGGAACCGCGTTTCAGTGGCTGGTGAAGTGTGTTGTCGATGCTTTGCCATAT  
TTTGACCAAGGTTATGATGCAGCAGGTGTGAGAGAAGCGGCTGCAGCGCTGGTTGAGGAGGAGACCAGAAGATATCGA  
CCAACCAAGAACTACTTGAGCTACCTGCCCACACCTGACTTCTCTACTTTTGTAGACAGAAATATGAGGAATGAATTT  
GAGCGGCTCGTGTCTGGCAGCCCATGGATCTCCTGAGCATGAAGAGATACGAGCTGCCCGCGCCGTGAGCTGGACAG  
AAGAACGACATCACAGCGTGGCAGGAGTGCCTCAACAACCTCGATGGCCAGCTAGAGCACCAGGCGGTCCGCATCGAG  
AACCTGGAGCTCATGTCACAATATGGAACCAACCGCTGGAAGTCTACAATGATAACTTGGCCTTCATGATCGAGATG  
GCACAAAAGAACTGCAGAAATTCAGGAAACAAATTCAGGATATGAACCTGAGGAGGAGGAGGAGGAGGAGGAGGAGG  
GGAGCTAAACCGAGAGACTGGAGTCAAACCTGGGTGTCTCTGGTCAAGAACTACGAGATCGAGCGGGCCATTGTC  
CAGCTGGAGAACGAAGTCAACCGACTCAGACAACAGCAGGGGGAAGAGAAACAAGGAGAATATCCGACAGGACTTCTAG  
AGCGGCAGCAGCTTTCATCAGGTATCATAAGACTTACAGGACTAAGGATGGAACGTTATCCATACGGAGGAGAGTTGA  
TGTGAACTGCATCATCCAATAACGTTGACATTCAGATGGAGCTGCCAGAGACCTCAGTGACAGCACACATTTTAC  
CAGACCTTATCTAGAGTAAAAACAGTGGTGGTTATGGTATAAAGCGGCTTTTGTGATGATTTTTATTATCTTCCAAG  
GATCACAGATGTTTAAAGCGAGACTATGTACAGTTTGTAAAGGATGGAACACGTTTCACCTTCTTACAAATGGAAGT

TGAATTGAAAAGCAACTAGAGATCATCTTGTGATGATGTTGACTTTCTGACTCAGGAGTAGTAAGTGGTCATTACTAC  
ATTAGTACATCAGAACTCTGTACTCATGGGTCGGACCACCCCATCTTCAAACCTAAGCCTTCATCTTGATCTCACGCT  
GGACTACACACCTGTAAAGTTTTGTGACT

>Sequ21289SNP2

GGCTCCTGCCTGTTCCAGACGTTTTTCACACGATGGAACCAAGAGGAGTAGGTTCTTTGCATGCATGTATTATGTGTCA  
AAAAAATATAATCTCTTACCTTTTTGCATCTTTAGGTGGTTGTAAAAAGAGAAACCCCTCCGAAAATTCATTTTTAGTATT  
GTTGCATGGGATGTACAGTATGTGACTCATCAGACCATTAGTTCACCTCCAGTAATGTGGGAGCATGCTTCCCTCCAT  
TTGGTACACGTGTATGTGTGACACTTGAGTTTTTGAAGATAGCATTGGGTTGCAGTTGGCTAATTACCGAGAAAGA  
CATAAACACCGTATTATGTTTTTGAAGACCAATATATTTACAGAGCATCATCCCCCTTATGATTTTTATTTGTACTGCT  
GCCACTTAATCTGGAGGAGAGGCCAAAAATTACCGCTGTAATTAGGCACAGTACTCATGCATTATTCCCCACAACGATC  
CCAAATTGGCTTCTTTTTTCAGGCTGCTTCTTTGATTTAGACTTAAATAACTTTACTCTGTACATATCAACATGTTTA  
CAGAAATGAAGAGTACTGCAAAATGACTACAGTCTTGGCTTTTTGACCCTGATGCTGGGAGCTCACTCTCTGGGCCGGG  
GACCTTGTGAGAGGGCTCCACTTCCAATGCAGCAAAAAAAGAGCAGGGGAAGAAAAAGCCTCATATATGTTTACT  
GGACACACTGCATTCTGAAACTTTTTTGTAAAGGAGAAAAACTTTTTATTGAACGGTCTCATCTTCTAGTTTGCAGCG  
ATCATTAAGATGCAGGACCCCTCAGGAGAGGTGCTTGATGAAGCTTTTGAAGAGCGTTTTGAAAGAGCGTTTTGAAAGAGCG  
CTGGTTGATGATGATAGGCTAAAGTTAATGCGGAAATTTCTTTTCAACAGTTTTGCTTCCCCATTTCTAGGCTATGCAA  
GCACGGACCGAGTGTCTGCTTGTAGTCCACTCACGGCAGTGGAGGTTGCAGAAGCTTTTCACTGTTGTTGTGCGATAAC  
ATAGCAGAAAACCAACCATCACATTATTAATGTCCATATTATTTATACATTTCACTCCAGTCACCATGTGAGATTCTT  
TGTCTAGTAAATGTTTATATCAAATACGAAAAATCATAATACAAGTGACTGTATTCTTTTATACATGTGGCATGTGTT  
GCACCAAACTTAATCTATAGTGATTAAATGAATAAACCATCAACAGGACTTTTTTACCTAAAAAATAAATAAATAA  
CCGACCTACCTAACTAAGT

>Sequ21305EST2

AAACTCGTCAAAGCTGGAGCTCAGATCGTGGGCATTAAGTCCACTTTGACCCGGAGACCTGTGTGAAGACTGTGAAG  
ATGATGAAGGAGGGCGTGGAGAAGGCCGGACTGAAGGCTCCTACATGAGCCAGCCGCTGGCCTACCACACTCCTGAC  
TGCAACCCGAGGGCTTCATTGATCTGCCAGAGTTCCCTTTCAGTCTGGAGCCGAGGATCCTGACCAGATGGGACATC  
CAGAAATACGCCCGGGAAGCGTACAACGCCCGCATTATTACATCGGAGTTGCTGTGGATTTGAACCCATACCACATC  
CGTGCCCTGGCTGAGGAGCTGGCAGCCGAGAGGGGCTTCATACCTGCTGGATCGGAGAAGCACGGCATCTGGGGCAGT  
GGCCTGGAGATGCACACGAAGCCTTGGGTTAGAGCAAGGGCTCGTCTGACTACTGGGAGAAGCTGAAGCCTGCGTCT  
GGCCGTCCTTCTGCCCTCCATGGCCACACCTGACGGCTGGGGCGTACCAGGACCCACGCGACCTGATGCAGCAG  
AAGGAGGCCACCTCCAGGAGCAGCTGAAGGCTCTCTTTGACAAGGCCAGCAAAAGTCACTGAGCTCCTCCTCCGATG  
TGCTGTTTGGAGAAGCAAAAGGGGTGGCGTGTGAGAGGCGAGCTCACACATCCCTTAAGTTTACATAACCAAAATAA  
AGATCGAAATGCTGAAGTTATTTCTGTCTCTTCTAAGGACATTTACACTCACATTTCAAATAAGCTTTAGCATTAGT  
GCCTGTTTAAAGTAGGATGATCACATCTGTGAGCCGTGTTACTGACTACAAAGCTCAAACAGAGCAGCTGTGAATGCAC  
CTGAGTGACGCTTAAACACTCCGAAAGTGTCTGTTGTCTTATAAAAGAACTGAATCATGTGTGGCAATAAACTTCCA  
GTTAGAAAACGAAAAAATAAATAAATAAATAAATAAATAAATAAATAAATAAATAAATAAATAAATAAATAAATAAATAA  
GTTAGAAAACGAAAAAATAAATAAATAAATAAATAAATAAATAAATAAATAAATAAATAAATAAATAAATAAATAAATAA

>Sequ21371SNP2

AAGTTCAGAGCCGAAATGTCTCTAAGAGCACTGTGCAGGTGCCCTGTGATCTTGACACCTGTTATGAATGGGAGACC  
TGCTCTGCATCAAGAAAGTGTGTCTGCAGATCTATCCGGGAGTGCCCCAGAGATCAACAGCACACGTTCTGTGTGAAG  
CTGAAAGGGATCCAGACGACTCGCAGTCTGGAACCTTGTCTTATGGCCTCTCTCAAATGTGCCAGCCGTGAGTTTGA  
GATTTGCAATGAAGCGCGTGTGTGTCCAGTTGATCTGTGCCATAACACTCAACACTCAAATAATGTTCCACCCTGC  
TGGAAAACTGAAAAATACTACACAGTTTTAAAATACATATGATTTCACTAAAAGGAGCTGCCTGCCTGTGTACTGG  
AAACACAGATTAAGACACTATAGACATATAGTACACCATGTTACTCTTTTAGAAAAACATTTATTTTATAAAGGCAA  
ACTGTACTGGAAAGCAGGTATACCAAAAATCCAAGCACCTGACACACTAAGAGCCAAAAGCACACTTAATGATGGGTG  
ATGGAAGCCAAAGTACATAACTGGGCCTTAAACAGGTTGTTTAAACATGTGGTACACAAAATTCATGAAAGCACACCA  
TCTTTAACTTGAAGATATTGTGGAAGCAAAACACCGTGACAGTGCTTTAAAAGGCTGTAGTTGATTTGCCAAGAAA  
GAGAAAAAACATGAATTTGATGATTGAGTAAATCTCCTAACTTTTTTGCCTGATCTGAGCCACTTTAGTCTGTGCA  
GTCTAATTATAGGAATAGAGTTGAATATTTACTTGGCTCAATGTTCTTCC

>Sequ21439EST2

TGCAGATCAACTCCAGTAATCCTACCTGGTCCAGACCCACACTCTCCAACATGTCGTTGAGCACCAGATCCTACGGCC  
AGAAGACCTTGAGCGTGTACGGCGGAGCAGGAGGCCGTGGCACCCGCATCTCTCATCCCAGATGAGCTATGCACCAT  
CACCTGCAAGCTTCAACCTGGCTGACGGCATAGACCTCCACGTCAGTGCCAACGAGAAGGCCACCATGCAGAACCTGA  
ACGACCGTCTGGCCTCTACCTGGAGAAGGTCGCGACCCCTGGAGAAGGAGAACGACCACCTGGACAAGCAGATCAGA  
GAGTGGTACCAGAACAAAACCGTCACTGCCATGACTACACACAGTACTTTGCCATCATCGATGACCTGAAGGACAAG  
ATTCGTATTGCTTCCAGGCTCAATGCCAAGACAGTCTGGACATTGACAACGCAAAACTGGCTGCTGATGATTTCAAG  
ATGAAGTATGAGAACGAGCTGGCCATGAGGATGGCTGTGGAGGCGGACATCTCTGGACTGAAGAGGGTGTGGATGAC  
ATGAACCTGGCCAGGATGGATCTGGAGAGTCAATGAGGCCCCGAAGGATGAGCTCATGCTCAAGAGGAACCAC  
GAAGAGGAGATGTTCTGCTGAGGAGTCAAATGGGCGGACAGGTTAATGTGGCCGTGGACGCTACTCCCTCTACAGAC  
CTGAACCAGGTCATGACAGAGATCAGAGATCACTACGAGGGAGTCACTCGCCAAGAACCAGCAAAAGAACTGGAGTCTGG  
TATCAGAACAAGATTTGAGCGGTGGAGCAGGAGTGTACACACACAGAGATTTCTGGTTACATCCCCTCACAGAGATT  
AAAGACCTGAAGAGCACCTCCAGAGGCTTCAAGATTGAACATGACAGTCCCATTTGAGCATGAAAGCGCTCTGGAGGGC  
ACCCTGGCAGAGACTCAGGCACGCTACGCCGACAGCTAGCAAGCCTCCAGAACATGGTCAACAAGCCTGGAGGCTCAG  
CTGTCCCAGCTCCACGCCAACATCTCCAGCAACAAGCAGGATTACGACATGCTGCTGGACCTGAAGACCCGGCTGGAG  
CTGGAGATCGCAGACTACAGGAGTTGCTGGATGGGGAGGATGACAGCTCAAACAAGTGGTCAACAAGGTCATCACA  
GTGGTGGAGACAGTTGTGGATGGAAAGGTTGGTGCAGAGCAGCAAGACTGTTGATGTGGATGTAGATCAGATTGAGTGA  
AAACATTTGAAGCGTTAGCAAAAATCAATAAAGATCATGCAGTTAGAAACAAAAAATAAATAAATAAATAAATAAATAA  
TAA

>Sequ21520EST2

GTGTATATACATGTTTTATTGTACAAAACATGTACCATTGCTCTCTACCTGTCAGATTAAGCATCAGGGCGGTAGAGT  
TTGAATTTTATCTGTATTAATTTTACTGGCCCTCAAGTAATTATCAGCTTATATTTCTGGAAAAAGGACAAATAAGAA  
AAGGAATGTGAAATAGGTCATGTCACTATTTGTGTCTTGCATCCCTGTTTACCACCATAATTGACTGAAGAGGCAGGA  
GTCTCCCACTGATCTTCCCAGATGAAAAGATTTTTCATTAATGTACTCCTTGTCTTGTCTTGTGTGTACAC  
GTATTATGGTTGTTTTACAGTATAGAAACCTGCTGCTACTGTGTGGTGGAAATATCAAAGCCTGTGGTTCAGTGTAGGT  
CACTAATTTACTCCTTGTACACTGTTCACTGTGTGTATGCTCTGTGTGTGAACTCGACGCCATCTCCACAGTCCTTT  
GACCTTCTCCGTGCATGGTGTAAACAATGACTGGAATTGAGTGGAGTGTCTCGTTCAAAGACGCTCACCTCAGGGTTT  
AAGAGCCACTATTAATTAAGCAGGACTACACAAATGGTATCCTGTCTGTTGAAGCCACTATTAATGACAAGTATGGGAA  
ACTCAAGAGGACATCTTAGCAATAAATTGATTTTCCGACAGGCTAGAAGTTTCAACAACCTGTGTTTACAATTGAG  
TGTCTTGTAAAACCTCATGAGCTTGAATTTTTTTTTTTTTTTAGTTGAGTCATGTAATATCATTCCATGTTACTGGAT  
TCAGTACATTTCCAGTTTGCCTGTGAACTAGAGATGTCTTTTTAGATGAAGGGTGGACTTTGTAAAAGGCTGGACGG  
CCGATGTATTTTCAACCCGCTCCTCACTGACTTGCAGTTCTTCCCATGTTAAGGAACAAACCCATCAACCCATTGTATC  
ATTAAGTGTCTACTTACCAAAAAAAAAAAAAAAAAAACCACCTACCTACTAAGT

>Sequ21581SNP2

TGTAGAGGAGAAGATGGATGCCCATCAGATGAGCATTTCAAACCCATCTGTCTTCGTACCCCCCCCCCTCTCTTTTT  
ATTCTTTTGCCTTGCCCTTCTCTTTTTCTCCCGCTGTCTTCCCTCTCATCTTCAACCTCTGCTTGTCCGCCCTT  
TTCAACTTTTTTCCACTTCTGTTTTTGGCTTCTCTTTATCAGTGGCGGGCTTGAACAAGGCCTTATATAAAACTGTGC  
TGCCGCTGAACGCCTTGTATTTAGCAGACATCTATACAGTACCAATGGTCTTGTCTATGATTAGTGTCTGTGACC  
TTTTCTTCTCACATGTAAAGAAAAAAAAAAAAAAAAATACAGCTTTTAATTTTCTGTCTGAGTCACTGCAGGGGTGAAAG  
AGTCTGTCCCCGCCATCCATTTAATTGTGGTTAAGAGACAATGAGCTGGTCTCAATGTTTCAAGATCGATCTCAGTCCAT  
CACAGTCTCATCCAATCAGCACTCGAATGACTCTTAAGTTCTCCGCTCTCCCTTCTCGCTTGTCCGACTTTCTCGC  
TTCCCTTCCCTTCTTCTCTGTCTCGTTTCCCGATGAAAATGCAATCAGAGGAGAGCATCTGAGGGGATGAAACTT  
TGAATTTATCTCTTTACAGTTTTTCCAGGAGGAGGCAAAGAAAGCAGGGGAAGAAATAGGGAATTGATGAGCTGAGGAA  
GTGCTGATCGAGTAAGTAATGAGGGAAATCGAGGAAGTGTTAGTGACCGAAGGCCCTCCTGTCTAAGCTGTGACA  
TCCTCTTAAACATATGATTGGTCCCTCTGGTGTGGTTGCATTATGACATTATCACCTCCTCACTGATGTTTGTGCAAG  
TTAATAGTTGTGTGCACTGGATATTATAGCCTGCTGTTTAACTGATCATGTTGATGTATATTTTTACATCTCTTTC  
TAGAAATCTGTGGTCTATTTCTTGTAGATGAAAATGTTTAAAAAGAAGTGTGTAATAAAAAGAATACATCTTTGTT  
TTGACTTTTGTATTTCTGCTCAAAAGATCTTGTATAGAAATATAATGAAAGGTGTTTTACTGTTCTGTACTGTTCTA  
CACAGATTTTGGTATTCACAGGACATGTGAACTGTCTGCTTACTCATTTTAAGAAATAAATATTATAAAGGAAAAC  
GAAAAAAAAAAAAAAAAAATAACGTAAGACGTA

>Sequ21587SNP2

TGTGTGAGTGAGTGAGAGAGAGTTAGTGTGAGTGTGATGTTGCTGTCCATCTCATCCCCCTTTTTCAGTCAAATGCT  
GAGGGCACCCGACCAAAATCACTCTCAACGTTTTCCAGTGGGAGAGGGAATGGACAGCATCCACTTTATTTATCCATC  
TTGAAAGGAGCTGCTGAAAAAGGCCTTTTACCATTTTGGAAATGAAATGTAATTCAGGGTAGTATGGTTTACTAACC  
CCCCCCCCCTTATAGATCTGACTCCTTGGCTTTGTAATCCATTTATTTTATGACTTAAATTTATCTGAAAAA  
AAAAAGTTTTACTTGAAAAAGATTCTTGAGAAAACATTCATGTTAATTTTGGCAAATTCAGCAAATAACGAAAAATGA  
GTACAAGTAAATGTGTATGTGTGTGTGTGGGCTTTGAGTATTTTATCATTTGACTGGAGTGTCTTGTGTGGGGAA  
GTGGGGCAAAGTGGATGATGATGTCTCACGTTGGTGAATGTATCATGTGAAAAAGAAACGGTTTATTGGCCCCAGCAC  
CTGGCTCTGCCATGCAGCCCAGAGGAAGGCTTGGAGCAGCTTCCCTCTGGACCGCCGGGTGGTGTTCAGAGTGTTCGT  
TTGTGTCCGGCTGATCGGCTGTCCAGCACCGAGTCCCTCCCACCTTCTTTTTATGAAGCTCTGCCTATTAACCCCG  
GCCAATGGGGCCAGGTGGAGTGGATGTTTGCCTTTGGATGGGGTGGACTGAGATTGCTGGAGGCCTAAAGCTGTGT  
TTGTAGATTTCCCTTTTCACAATCAATAAAACCATCATCAACTCAAGAAAAAAAAAAAAAAAAAACCGAACCTACCT  
A

>Sequ21636EST2

CAACATAACACTGTCCAGACAGAATTTAACGTGTTTTTTTTTGGCGTAGTTTGAAAACATATGACATAAATAGTTTGT  
AAAGTTTGTCTTGTAGTCTCGTGAATAATTTAAGTGTGACAAGGAGCGTTNTAAAACCTGTGGACTCAGTAAAGACTG  
TAGTCCACCGTGGTTTTGTCTTAAACCGTAGAACTACACCTGCTAGCCTCTCCGGCTCGTTTACAGATGAATGAAGAAG  
AGCTGGTGGAGTATTTTCAAGGCTCAGATGAGGAAAGATCCGGACATGGCCCTCCGCTGTGGCCGCTATCCGCACTCTGC  
TTGAATTTCTCAAGAGACAAAGGTGAAACTATCCTGGGCCGTGAGGGAGAGCCTGAAGTGGGCCACAAACTGCCTGA  
CAGGGGTGGACTCCTCTGTGGCCGTGTCTCAGGAGGAGAGCTCTTCCCTGCGTTTTCATCAGCCTCACATCACTGGAGC  
ACCAGGATCTGTCGCGCTGTAAGAAGGTGATGGAGGAGAGAGGAGAACATTTCTAGAGAAGATCTCAATGTCCAGGA  
CCAAAGTTGCTAAACTCTGTACACCTTTCATCAAAGATGGCACCAAAAATCCTGACTCACTCCTACTCCAGAGTCTGTC  
TCAGAGTGTGAAAAAGCTGCAGCGGAGAAGAAACGCTTCTCTGTCTATGTGACTGAATCGCAGCCTGACTCAGCTG  
GGCGACAAATGGCCGAAAGCCCTGAGAAAACCTCAATGTTCCAGTAACGGTGGTCTTGGATGCAGCTGTGGGGTATGTCT  
TGGAGAAGGTAGATCTAGTTATTATTGGTGCAGAGGGAGTCTGGAGAGCGGAGGAATCATCAACAAGATCGGCACTT  
ATCAGATGGCGTTTGTCTAAAAGCTCACAAACAGCCCTTCTACGTCGTGGCGGAGAGTTTCAAGTTCGTCCGTCTCT  
ATCCGCTCAACAGCAGGACGTGCCGGATAAAATCAAGTCAAAGCAGACACCCTGAAGACGGTCCATAACCTGTGAG  
AGGACATCCGATGATTGATTACACACCTCCCTCCCTCATACCCTCTCTTCAACGACCTGGGAGTCTCACCCCGT  
CCGCGCTCAGCGACGAACTCATCAAGCTTTATTATAACTCCGTGCCCTCAAAATCTCAAATAAAATTTTATAGAAAA  
AGACTGAAAAAAAAAAAAAAAAAACCAGAACCTACCCTAACT

>Sequ21644SNP2

GTAAGTGAATATCGGAGCCTAATCACAAAAAGAAGAAACAACTACAGTTTATTGTGAGTTACAACCTGCTTCCAC  
ATTGAAAGGTAGAGGAAAAAGCTGTTATATGTAACCTAGATGTATCTATAAAATCAATTTCAACCATGTTTGGCCAG  
TTTTAATCTATATCTTGTATGTCATTTTGTGACAGGTTAGAGGTTCTTGCCCTATTGGTTTATTTTCAAGAAATGCG



AGCGCCGACCTGGTGTCTCAGCTGAGAGCTGCTCACCAGGAGAACAAGACCACCTTTGGACTGGACATGTCTGAAGGC  
ACAGTGGGCAACATGGCAGAGCTGGGGATCACAGAGTCGTTCCAGGTGAAGCGTCAGGTGCTGCTGAGCGCCTCCGAG  
GCCGCAGAGATGATCCTGAGGGTCGACAACATCATCAAAGCTGCACCCAGGAAGAGAGTTCGCCACCATCATCCCTGC  
TAGAGGAAGAGGAGATGAAGAACGGGGGAGGGGATCAGTTTTGTTATTTATCACCTCTGTGTAGTTCAAATTTAAAG  
AAACGCTCCGCTGTTTTTTCTCTGTTGTTAAACTCACTGTGGAAGCACTGTACAGGCTAGCTGGCTAACGCTAGCTA  
ACCGTCAGACACAACCTAACCGCAGCGGCTCTGATGCTAATGCTAGCAGGACAAAAGTGGCTAAGTGTGAAACTTATG  
TAAAACGTTGGTCAGTACAGTTTTGTGATGCTAACATTAGCTGAGGTCGCAGCAAGTCTGGAGGCTGGCTATGCTAAC  
GTTAGCC

>Sequ21746SNP2

CTCTTATTAACCTCTAAGGGGAACAGGGTGTCTTGGATGTCTTTACAAGTACAATGATTGTGTGTTGTGCCTGTACAG  
TTGTTGTGTATTTACAGTATGCACAGATGTCATGACAGTCTGTATTTGGTCTCTTAGTAAATAAAAAACAACCTGACTAA  
TGTTTTGAATTTGTAATTCAGGGCCTCATTTATATAAAAAACGCTCCCTGTCTTTATCTTTATCCATTGTTTCGATCAT  
TTTCAAATAAGTTGATTAATTTCTTTTTACATTCAGTGTCTTTCTATAATGAGAAGACATTTTAACAGACTTTTTTTTA  
CTTTTATTCCTTATCAAGACCCCTACTGTGCATAAATGAGGCCTGAAAATGTTTCCACCTCAGAATTCAAATGCTGCA  
ACTTTGGCGTCATATGGCATCACAAAGTTCAGTCAAATCTGTACGATGCATCGCTTAAAATCTCAAGGAAGCTCAACAG  
TGCTGATATTTCTGACTCATGTACATAACTGCCTTGCTGCTCAAGGTTCCCTTATGAGCTGCAACCTCCACCTCCTGCT  
TTAATTCAGACCAAAAAGGCCCTTCAAAGCAGAGGAAATATAGTTTCCATGTTGGTGTATTAAGTCACTCCTTATATTG  
GCAATACATCATCGCATTACAATACACCGCCTGGTGGAGGATGTTTCAATCTCAATCATTTTGTGTGTAATTTAAGTTTG  
CCTTTTGCAGTCTACCTACCATACTGAGAGCCATTTTCACTGATATCTCTCAAACCTTGTGTCTATTTTTGTGTGTA  
AATGTAATGTACATATTTGGTGGTGTGTGTGGCAAGAATAAAAAATTTACAATAAAAAACGAAAAAAAACCGAAC  
CTACCTAAT

>Sequ21767EST2

GAGAAGTGCAGGACCCACTGACTATTTGACGTTAGCTTAAAATTC AACACTTCACTCCC GAATAAACTTTAATTT CGCT  
ACCATGAAAGATGTTACCGGGTACCTCAAGCAGCAGCAGAGCAACAGCTCAACACCCGGAGATGGCGGCGGAGTGGCAG  
AACCTGGAGGATTTGTATAACAAAAGATTGTGGCATCAGTTGACTCTGAAGCTGACAGACTTTGTTAAAGATCCCTTC  
TTCAAACAGGAGATGGCCTCATACAGCTCTATGAAAATTTCCCTCAGTACTTGAACACAGAATCAATCCTTTGTCC  
CTTGTGGAAATTA TACTGTATGTTGCCAGACAGATCTCAGAGCCTAAAGATGCCATCACTTTTCTCGAGAAGACCAAG  
GAAAAGGTGAAAAGCAGCGAAGAAGCCGTCATTCTCTGCAAGACAAC TATTGGCAGCCTGAAACTGGAGATCAGCGAT  
CATCCTGCCACAAAGAACTCATCGAAGAGGTTGAGGAAATGTTGAATAACTTGCCCGGGGTGACGTCAGTCCACGGC  
AGGTTTTATGACCTGTCCAGCAAATACTATCGCATCATCGGGAACCACGCCTCCTACTACAAGGACGCTCTGCGCTAC  
CTCGGGTGTGTGGACATTAAGACCTTCCAGAAACAGAGAAGCAGGAGAGGGCGTTCACACTCGGACTGGCTGGACTC  
TTGGGAAGAGGATTTACAACCTTTGGAGAGCTGTGATGCATCTCTGCTGGAGTCTCTGAGGAACACAGACAAACAG  
TGGCTCATTGATACACTTTATGCCTTCAATGGAGGCAATGTGGAGAAATTCAGGGCTTCAAGTCTGCCTGGGGCCAA  
CAGCCTGACCTTGCAGCACATGAAGCTAAACTGATGCAGAAGATCCAGCTGCTCTGTGTATGGAGATGACTTTTACA  
CGCCCTGCAAACCACAGACAGCTGACATTCAGTGCAGATCGCTCAGAGTGCCAAAATCCCTGTTAATGAGGTGGAGCTC  
CTGGTGTGAAGGCTCTGTCTGTCTGGCCTGATCAAAGGCAACATTTGATGAGGTGGACCAGAAGGTGCAGATGACCTGG  
GTGCAGCCAGAGTGTGGACCTGCAGCAGATCAAAGTATGAAGGAGCGGTTGACTTCTGGTGGGCTGATGTTAAG  
AACATGGCCATGCTGGTGGAGCAGCAGCTCACAGATCCTCAACCTAAACAGGTTTCAGTCCACAGAAGGAAATCTCA  
CTTCTTCCAGAGATTTGTTTTTTCTATTGTTTTCTTTTTTTT

>Sequ21786EST2

GCTCCTCAGAAACACCCCTTCCAAGATGGCAGCCAACAGCAGCAGCAGCGGGTAGCAAATCTAGCAGCAGCGCCGGAGGA  
AAACAGTCCGGCCCTCAGCCGAACAGGTGGTGGCAACATTTT CAGAGGATGCGGCAGGAACAACGCAGTATGGCTTCT  
AAAGCTGCTGAGTTGGAGATCAACGAGCACAGCTTAGTTATTGAAACGCTGAAAGATGTGGATCCTT CGAGG  
AAATGCTTTCTGCTAGTAGGAGGAGTGTGGTGGAGCGAACGGTAAAAGAAGTCTACCTGCCTTGAAAAACAACAAA  
GAACAGATCTCCAAAATAATCGAGTCCATCAACACACAGATGCAGACGAAAGGACGGAACTCACAGAGTACAGGGAA  
CGCTACAACATCCGTTGGTGGGAGAGGGCGAGGGAGAGGCACAAGGCCAGTCAGCGGCGTCTCCAGGGACAGCGAG  
GGAAGCGGGTCCAAAAGCGGTGCTGGTGTTTTGTGTCGTAATTTATAATAAAGGGCTACAGTAGGGCCTTATGATTT  
CCGAGTACTGAAAACAGTTGGAGTCAACAAATCTAAGTTCAAAAACGGAAACCCTACACAGGAAAACCTTTGGATTT  
GGAGATCATTTAAAATTTCTGCTAAATACACCTGGCATTTGAAGTAGTTTGC AACAGACACAAAATTCAAAGTGTACATAG  
TACTCTGCTTACGTATGTT CAGAGTGAATGCTAGTGTGTGTA AAAATACGAGTGTGTTGCTTATATTTGCCTTCATA  
TTGTGGCTTAAATTCACAATTAATTTCTGCCTTCTTGTCTCATTTACACACGAGTGAGTTAATGTTATTTTACTGT  
CTCAGATAAAACATTTTTTCTCCATGTAAGATATAATTAGGGAGTTCAAATAATTTAATAACACCTAGAACATACA  
AGACAACTAGATCACATTTGCATTTT GAGTAAACATGCTTTTGCATTTTTTAACTTAAGATTTTGGACTAACAACTT  
AAAAATGTGAACACATAAAAGCTGATTTTACATAGGCCCTTAAAGTAGGTTGAAAGTCAACCTTGTCAAGGCAGAACTGG  
TCCTAGAAGGCATTTGCCAACATGTGTTAGAGATTACTGTAAACATGTCACCTGTAGATCAAATGAATCCTTGTGAG  
CTTTATTCACCTTCCCTCTGTGACACATTTTATGTGCGTCTTCAAACATAAGCCATGCATTGAAAGACTGCTGGTTTG  
TATACATAACTGATGTGAGGTCAGTTTGTATT CAGTAGTTACTAAAGCTCAAACAGTGTGACCGGGAAATGC  
TACAGCACACCTTAATAATAAAGTCTGTTATTA AAAACACAACATAATGTTGTGATTTCTTTTTGATCTGTAGCGCA  
TGCTTGAGCGTGGAAATGGTTAAAATTAATTTGTTAAACAGTCTAAATCGAGGAAATGCCTCCTAGGACCTGATGGGTACT  
GTCACACTGTTTATGATGTTAGGGCAAAAATGTTTTGTAATGATCATCAATTA AAAAGAATGTCACAATTTGAACGA  
AAAAAAAACCCGACCTACCTAAT

>Sequ21811SNP2

GAGATGGATACTATTCAGTCACATGCACATTTT CATATTTATAGCACTGTGAAGAATGATGTCCTGCAGACTGTTGCCT  
TCTTAAGGTGTTTTATGCAATAGGGTACAATTTGATTACCTTCATATATTTATCAGACTAATGCATAACCTAACAGAGC  
ATTACCACCTGTGGCTCTCAGCACTATACGTGACTGTGGGACCTGGATCAGTGTGCCTTACGTTGAACGGTTCGCTAGA  
AGTAAGCTGTTGCAAAATGAAATTTGCTTAAACGTAGCGCTTTGTTGCTGATTTTTCACCCGAGTTTTCTTTCTTTT

TGTGAACCTTTTTGACCTTTACTGAACCACCTAAACATTCAAAGATGGTGTTCGATCACTTTCACAACATTTTTAC  
TCGTGCTCATGTTACTATGAAGCTATTACCTCAAAGAAATGCCTGACATTTTGTGACCATTTTTCTTCTAAACTTTA  
TGAGGTATGTTGTGATCCGTGTGAGGTAGAACTTAGTTAATGTCAGTGATGCCACTTTGTTGTCTTTGTTTCCTTCTC  
AAAAGTTCATAAAAACATTTCCAGTCCCTATGAGCATCACCTAAACCTCGGCTCTTTAGAGATCGGTACTGTAATCATT  
GTGACTTCATTTCCACCTACTTTATAAAAAGAGGAAATGTTTCACCTTTGCACCTGAAAAACAGGGGACGACATTGCTAAA  
CAAAGGTACTTGTACAGTAGATTTAATGTAATAACCATAATACTGATGATAGGTTTTGTAGTACGGAACACTGTTAGT  
TATATATTTTTTACCTCTGGATGAACCTAATCTGTAAAATATGGATTCCCTATAATCTTTTGTACGTATTTGTAATATT  
CACTGTGCTGTATAAATTTCTTTAATAAAACAAAACCTGACCAATAACCGAAAAAAAAAAAAAAAAACCGACTACCTAT

>Sequ21821SNP2

CCGACCAGAGCCTCATAGTTGAGCTGGTGGAGTACCAGGGGAGGTGGCAGACCAGGACTCCCCAGGTATCACTTTG  
AGGACATCGCGGGCAGTAACAAATCTCTGGAGCCAGGTGCTTTTGGAGGTACCAGCGTGTGGCTCTTCCCAAATCCG  
ATGTGTCCCTGTCAGAGTGCAGCTCAGCCTGGACGCTCACTGGCACACAGTGTGTATCCAAGTTCAACGAAGAGGCGA  
GGAACACAGTGACCCCTTACCTGGGGCTGTTCCGCCTGCCCCAGTTCTCCACAGAGGTCTGATCACTTCAATGA

>Sequ21826EST2

GTCCATTTCATGTTGGTGTGATCACTGATCACCCTGGACAGACAGGCGAGCTGTCCCTCTTCTCTCTTGTATCTG  
AGCAGCAGAGAAGCGACCATGCCTGGACTTCTGCTTGGAGACGAGTTCCCAACTTCGAGGCGGACACCACCATCGGC  
AAGATCAAGTTCACGACTTCCTGGGCAGCTCGTGGGGTGTCTGTTCTCCACCCAAGAGACTTCACTCCTGTCTGC  
ACCACTGAGTTGGCCTGCGCCGCTAAGATCAGTGATGAGTCAAGAAAACGAGGTGTGAAGATGATTGCTCTGTCCATT  
GACAGTGTGAGGATCACCGCAACTGGAGCAAGGATGTGATGGCATTAAACAATGAGGCTGACAGCACGCTGCCCTTC  
CCCATCATCGCTGATGACAAGAGAGAGCTGGCTGTCCAGCTGGGCATGCTGGACCCTGATGAGAGAGACAAGGATGGA  
CTGCCCTCACTGCTCGCTGTGTCTTTGTGATCGGCCCGACAAGAAGCTGAAGCTGTCCATCCTCTACCCCGCCACC  
ACAGGGAGGAACTTTGACGAACTGCTAAGAGTTATCGACTCTCTGCAGCTCACCGCACAGAAGAAGTTGCCACACCG  
GTCGACTGGAAGCCTGGCGACAAAGTCATGGTCATTTCCACACTCTCTGAGGCGGAAGCTGTGCTCTCTTCCCAAC  
GGTGTGACAACAAAAGAGGTACCGTCTGGGAAGAAATACTTGCCTACACCCAGCTCTGAAGACGCACTAAGGACTTC  
ATCCTGTTCTACTTTACTGCGCTTTGACCCAGAAGTCTTTGATAATTACGTTAGAGAAGTACCAAAAATCATAGAT  
TGCATTTCCAGGTTTGGGGACGAGTGTTCAGTCATGCCGCTGCACAGCAACAAACCAGGGATAAATTATAGTGTG  
AATGTACAGTGCCTTTATCCTCCCTCAATAAACACCCCTCTTAAACACAAAAAAAAAAAAAAAAAACTAACGTAGA

>Sequ21898EST2

GTGAGATCCAAAGTCTCATGACTTAATAAGGGTTTTGCAGTGTCCGCCATGACTGAGGTGAGCCATCAGCAGTGGGG  
AGAGGTGTCCGGCCAGGGCAGTGTGGACCTGTGGGTCCTCCAGTCCCTCCAGGTGCGGGTGGAGGTCTCACCTGGG  
CGCCATCATCAGTCTGTGTCCAGCAGGAGGAAGGACGGTTCAGATGGAGGACATAGTCTTGGGCTACGACAACCTGGA  
AGGTTATGTGTGATAGATAAGCGGTACCTGGGAGCTGTGGTGGGCGCGTGGCCAAACAGGATCGCACGGGGGCGCTTCGT  
CGTGGAGGGAAAAGAGTTCAGCTAGATATCAACAACGGGCTAACGCATGATGGAGGGCTGCGGGGCTTCAACAA  
GGCTGTCTGGCTTGTACAGCAGTGGGAAGTGGTGTACAGCTGAGTCTTACCAGTCCGGATGGAGACCAGGGTTATCC  
TGGAGAGGTTTCAAGTCTCTGTACCTACACCTACAGGGGAAACACTTACTGCTGAATACCAAGCCAGGTGACCAA  
AACACCCCATCAACCTGACCAACCACTCTACTTCAACCTGGCTGGACAGGGTGCAGCAGATATCTTTGACCATCAT  
GTGTCCATCAGTGTCTGAGTCCACTGCTGTGGATGACACATCGATTCCCTACAGGAGAGATCAGAGCAGTAGAGGGC  
ACGCCCTTTTGACCTCAGAAAAGCCTGTTCTGATTGGCTCTCGGCTGAAGGAAAGTTCAGGGCCAGGGTTTTGACCACAA  
CTTCTGTCTGTATCCCTGGAGACGGCTGGACAGAAAGACACGCTGCCAGAGTGTGTACCCAGCCAGTGGGCGTGT  
CCTGGAAGTTTTTACCAGCCAACAGGAGTCCAGTTCTACACCGCCAACCTTCTGGATGGCTCCATCAGGAAAGGG  
CGGGGCTAGGTATGGGAAGCACAGCTCCTTCTGCCTGGAGACACAGAATTGGCCTGACGCTGTCAACCAGGTTTTATT  
TCTGACTGTCTCCTGCGCCCCGGTGGAGAACTACCAACATGTCACCTCGCTTACCTTACCACGCTGTGATCTGACCT  
CCACCTGCAGGGGGACACAGAAGAAGAAAACCTGGTACCTTGAATAGAAAAGTGGAGTCCAGTAATTCATTTACTTTT  
TCAGGGCAATCTTACTTCTGTCTGTGTAACGTAAATGCTGATTATTTTTGAATGTGAAGAAGTTCTCGGTG  
CTGTGACGGTTTTGTGACGAGAATAATGGCAGCCTGTGCAGGGTTTTGGTGTGGGCAATGACACGATGCTCTCATGG  
GGATGATCTGTGATGTGATGATCCTCTGCCATATTTCTTACATTAACCAAAAAGTCATAAAGAGCCTCCTCATTCAA  
GCTGGTTATTGCCATTCCTGCTCCCTTCTACCTGAAATTTTTGTTTTCGGTTTTTAAAGTCGATTTATTTTCGGACTTT  
CTTAATGAGAAAACAAAAGTTTTATCTCCCAAGTTGAAATCTTACTGTTTTATAAGGCTTCTACTTCTGAGCAAT  
CAGCATTTAGAAAATGCACAAAGACACCTCTGTGAGTCCCTGCTGCTCAGTGCAGGCGGGGACAGGACGACGACA  
AGACAGGGAACTAAGTGGAGATGAGAAAATGTCCTGTAACACGAGGTCATAGGAACAAGAAGGACGGCAGTACAGAA  
TAAAGTTCAGTCTCTGTCAATTGTTTTAGATCTTGTGAGGAGTTTTATTTTCACTGTAACATGTTGGCACACGGGG  
CACCTAATGATTTAAAGGTAATTGAATAGTCTACATTTTAATTGATAGCTTCTTAATTGCACAATAAACCCAATTTTC  
AATTA AACAAAAAAAAAAAAAAAAAAAAAAAAAAAAAAAAAAAAAAAAAAAAAAAAACGAAAAAAAAACGAAAAAAAACT  
AAACCTAACTAAC

>Sequ22045SNP2

GCAATAAATAAAAATGTGTGGCCACGTATACAGCCCTCACTATAGACGTGTGGCTGTTTTCACTCATTTATTAATAATGGA  
CCAGTGCATTTACTTGTGATCCATTTATTTAGGTTACTTGGAAAGTTAAAATACTTTGTTCCAGACTTATATCTTGT  
GGGCACAGTAGCATTTGAATGGATCGACGTTAACTGTGGGCTCCCTTTTTTAAAGAGAAGCATGGGGTGGTAGTAAAGC  
AATGGGAGGAGAATTTTAATAGAAAAATAATACTGGCTATAACCCAGCGAGGTTTGTGGAATCATGTAGATAGCAC  
AATGGTCAGTTGATGCAAAAGAAAACATTTAAGTAAATGAAGCTTTTGAAGTAAATAGCTTGATAAATACATGACGATA  
GAGATGAAGGGAGGAATAAACCGATGGTTGTAACATCTAGTAGTCATTGATATTAATTTGTTTCTTACAGATGTAAT  
TTGCAGCGCAGACCTTTTTACAGGGTGAATCTAGTGACCAAGCGTAGATAACAGAGGACACAATCCCATAGTGGGAGC  
AGGTAGATAGACCTATGACACCTCTAAGAAAGGGACCATGTATATATGAAATGTACACGAACATCGTACATGGATTTT  
GTATTTATAAGTGGTATCCTTTGATCTATGTGCATTACCAGAACTATTTATGATGCTTGTCTTTTGTATTTTTAAT  
GACCATTATTCAGAGTACAACAGTAGGAAAGAAGATGCCAAATTTACAATGAGAGCTGATTGTCTATGTTTTTAAAG  
GAACAATGGAATTGCGCGTAATACACACTTTTTCTGTCCCTGTCCTTTGTGCTCTTTTCATTTCCCTCATGACTACGT

GATGAGCTGTTCCAACAAGGGTGGGACTTGCTGTTGTTTGCATCATAAAAAATGTAATAAATGTTT GCAATGAATAAA  
AAAACCGAAAACCTCCCTA

>Sequ22049SNP2

GTGTGTTGATTGTACAGAAAAGATAGTAATGCTTAAGAATGTCTGTGGGATTAATGTTTACTGAAAAGCACACAGTAG  
AGAGAGTTTGGAGTTTAAAAAATAAATGGGAGGGTGGAGACTGGATATACGACCCGATTTAAGGCAAAATATTAGGAA  
CCCATGGCATCAGAATGTTTGGAAAGTAGTCTGGTTTAAATATATTCTAAGGGCTAACCTCCAGCGCGCCGTGATTGAA  
ACGCCCTGAAAATTAAGTGACAGGCAAAAAAACGGACATGCAGCGCAAGAATCACAGTCTTGTATGGCACACCTT  
CCTTAGCTTACGGCCACTGCATTAATCAAGTGTCTGTGTTTACATTGTTGAGGATCGCAGAAGCTACTATACTTAC  
ATTGACCACCATAGTGCTTGTACTCAAACATTGGCTTAACACAGTCTCTCATTCATGTTTCAGTGCTTTTCCAGGA  
GCAAAACATAAATTCATAAATCATTCTCTCTTTGTCTCATGAATAGTTTAAATAGACTCGATGGTCCAAATATTTTCA  
GCTGGATACTAAAACAGATGTTTGTGTGAAAGCTATGAGCAAATTTGCTCTGCTGGGTATTCAAATAACTTGTTTTGGC  
TTTTATATAAATACCTTGGAAATAAAAAATAAATAAATAGATATCCATGTCTTTGATTGGATGGTTGTATGTATGCC  
ATCAGTTAAATGTTACCTTCATGTTTACTTATTTTAAACATAACCCTAATGTAGCCTATCTGTTTGTGAATGCAAGA  
GGTGAAGCTTACATTTCAATTCATTTTTTGTGAGGTATTTGGAAATGGCAAAATAAAGTGGATATTACTAATAATAAAA  
AAAAAAAACCGAGACTGCCAA

>Sequ22051EST2

ACATGGGGACTCTGACGGAGGAAAGTGAGCAGGGAGGGTTGGTCAACGTGGCACGAAGGGACCCCCCAACCCCTGTA  
TTTACCAACAACAGGCGCCTGTTTCCCAACACTGTACCGTCTTAGCGCACGACTCTCTCTGAAAAAAAAGCTTCCCTC  
TACCACGACTAATAAATGCCAAGAGAAACAAGACAAGCGCAACAGATAAGGATCGCTGCTCAGAAGTGGAGAGAAAG  
ACGAACAGTCGGACAAAACACGTAGAGAAAAAAAACAACCCAACAAAAGCGCACGGATCGTCCCGCTGCCTTTTCTC  
AATGCATACCCTTTGTGCCCGGGAAACGATGAAACCAGAGATCAACGCCCGCCGTCGGATTTCTGTGAGATTTCTGAG  
GGTAAAAGGACACGTAACGATCGACAGGTCCAAACATTCAGCCAAAGCTTACAGGACATTTTGGCAGAGCAATATAA  
GCACCCTGGTTCAGACAGGCCCTGCAAGGGTTCAGGTTACCGCTGCATCCGCATTAACCACAAGATGGACCCACT  
GGTGTGGCAGGACAGGCCAGCGCATTTGGCCTGACCATCCAGCAACTCTACCTGCTGCTGCCAGTGAGCTCACACTCTG  
GGTGGACCCTTTCAGAGTGTCTACCGCATCGGCGAGGACGGCTCCATCTGCGTCTGTACGAGTCCCAGCCCGGCC  
CGTAGGAATGCCGATGGCCCGCCACCGCCAGCTCCCCCTCAGGAAACAGCGGGTCCGGTGGAGCCCATGGTGGACAGTCA  
CATCAGCTGCAAGGAGGAACTGATGGTGTGGGCGAACCAGTCCCTCCAAAGCCTACAATATGATGACTGTGTCCAG  
TTAAAGAGGCACACCGTCAACCCGGCCTACTTTTGTTCAGGGTACGCCATGCTTGGTCCAGATCATGTGACCAGATCA  
GGGTGAGCCTTTTAAAGCTAAGAATATGAAATGAAATAGTGAAAGAAGAAAAAAGAAAAAATAAATAAATAA  
AACGAGAACGTACGTAC

>Sequ22180EST2

AGTCCAAGTATGCGTCTGTCTCAAGCTACTGGATGAGATGAAGGATAACCTCCTGTTGGACATGTACCTGGCCCCGC  
ACGTCAAGACCTTGTACAGCCAGATCAGGAACAGAGCCCTCATTCAGTATTTACGCCCTACGTGTGAGCAGACATGA  
CTAAAATGGCTCAGGCCCTTCAACACCACAGTAGCAGCTCTGGAGGACGAGCTCACACAGCTCATTCTGGAGGGGCTCA  
TCAATGCACCGGATCGACTCCCACAGCAAGATTCTCTATGCGAGGGATGTGGACCAGAGGAGCACAACGTTTGGAGAAGT  
CGCTCCACATGGGCAAGAGATTCCAGAGACGGGCCAAAGCCATGATCCCTCAGAGCTGCTGTGCTGCCAACCAGATCC  
ATGTCAAGTCTCCACCAGAGAAAGCAGCCAGGGTGAACACAGCCAACAGCCAGCCAGCCAGCCAGCCAGCCAGCCAA  
TGTGAGGAGGAAGTCTCTTATAGTCTGCACCCTGACTCCGCTGTGAGCCACAGACACACATCAACACCAACCCAAAC  
CCCAACCATCCCACCTACAATGTAAGACTCTGATGTTCTCTGATGATCTCTGTCGTCCTAAAGACGATGTGGGGAG  
TAAAACCTTTTGTAGTCTGATGGTTTGAACAGGATGAAAATGTTTTTTTGTATGATAGTGCAGCACTTATGCTGTAAG  
TTACTGGTAGGAGATGCACTTTGTTCTGCTTACACATGATGGAGGCCCTCATTAACAGAAAACAACTTTTAAAAATAAAA  
AAAACCTAACCGAAAAAATAAATAAATAAATAAATAAATAAATAAATAAATAAATAAATAAATAAATAAATAAATAAATAA

>Sequ22200EST2

CGCTCCAACATCGACGCCATGTTTCGAGGCTTACATTGCCAACCTGCGCAGACAGCTGGATGGGCTTGGCAATGAGAAG  
ATGAAGCTGGAGGGAGAGCTGAGGAACATGCAGGGACTGGTGGAGGACTTCAAGAACAATATGAAGATGAAATCAAC  
AAGCGCGCCACCGTGGAGAATGAGTTTGTGCTCCTCAAGAAGGATGTAGATGGCGCCTACATGAACAAAGTTGAGCTG  
GAGGCCAGGGTTGATGCCCTTCAGGATGAGATTAACCTTCCCTCAGGAGCTCTATGAGGCGGAAGTCCGCTGAACCTCCAG  
GGACAAATCAAGGACACCTCAGTCAATTGTGGAGATGGAAACAGCCGCAACCTGGACATGGACGCCATTGTGGCTGAA  
GTCAAGGCTCAGTATGAGGACATCGCCAACCGCAGCCGTGCTGATGCTGAGTCAATGGTATCAGCAGAAGTACCAGGAG  
ATGCAGGTCAACGCTGGCCAGGCTGGAGCTGACCTTACAGCACCAGAGTGAAATCGCTGAACTCAACCGTATGATC  
AGCCGTCTCCAGAAATGAGATCGAGTCAAGGGACAGCGTGCCAACCTTGAGGCCAGATCGCTGAGGCCGAGGAG  
CGCGGTGAGCTGGCTGTGAAGGACCCAAAGCTCCGCATCAGGGACCTGGAAGACGCCCTGCAGAGAGCCAAACAGGAC  
ATGGCCCGCCAGGTCCTGAGTACCAGGAGCTCATGAACGTCAAGCTGGCTCTGGACATTGAGATC GCCACCTACAGG  
AAGCTTCTGGAAGGAGAGGAATCCAGAATTTCTCCGGTGGTGGATCTGCAACCATCCACATAACAGAGCTCAAGCAGC  
GGCTTTGGAGGTGGCATGGGCGGCGCATGGGCGGCGGCATGGGCGGCGGC

>Sequ22211SNP2

GCCTGAGTGAGGGTGTGTTGCTTTAGTACTGGTGAGAAGATTTTTATTTACGTAATATTTTCTCGTGTTCGTACAAT  
CTATGAATCAGTTCTCCATAGTGAACACTACTTATAGAAACGAAGGACAAGACGACAGTTCTCTTTCTAAAATTCA  
GTGTAAGCTGATAGCAGTTAGCCAGATCAAGTGTGTATGCTTACGCTAGCTCGTGGCATGTGTGTCTGTTGGTTGAGT  
CTTTGGTTGAGTGCATGAAAGCCAAAGTTCCGCAAGTCCAATGGAAACAGAAATGAATCATGACATATATATATGAAGC  
ATGTGACTCGATGTCCACTGAAGTTTGTCTCTG

>Sequ22258EST2

AGAAGAAGAAGAGTCAGTATGGCGCACTCTGATTGCTCCTCTGTTAGCGAATGAAAGAAACTCTTGTACACGTGTG  
GTCTCTCCATGTGAGTGGTGCCTGCCTGCTGACTACTAGCTAAACAAAAGAACATGCTTCCGTCGAGAGGTGAGACTGA





GATGAAGTGAAGACATGGAATAGAACTCACCTGTAATCACACCTACATGACTTTAGGTGTGATTACAGGTGAAACCTT  
CAACCAGAGGAGCTCAGTAGAACAGTCTTTATCAGTCTGATGTTGTGTTACTCTGTCAAGATGCTGTTTCTTTAACTA  
TAGGTTCTGCTCTTAGGGGAACTGAGATTCAGAGGTTTACTTTTGGACAGGAGACTTGTGTCTGTGAAAAAACTGTA  
CTGCTAAGGAAGAAGAAATTGTGCCTACAAACAAACTTAACAGTTGCTTAGTTGTGTAACCTGACAAACCGAAGAATTCT  
GCATCTGCTTTGCACTATGTCCACTAAAAAGTAGAAATGCTGAAATGCAGAAAAATGCTGATGTTAACATATTCAATATT  
AAACATTTCTGTTTCTGTGAAATAAAATGAATGTTGATCTGCCTTCCTCTGCCTAATAAAATTCAGTTGTTACTGCA  
GAAAAAACTGTGTGAAGCCATTAAAGTGCTGTTGACGGAAAAACGAACTAAAAAATAAAACCGACCTACCCTA  
T

>Sequ22647SNP2

GCTTATAAATAAGCGTGACATACTGTATGTGGCCTTTCCATTTACATCGGAGCAAGTTTGTGCGCCGCTGCAGGTTTT  
GAATTCGGCTTGAATGTGTCTTGGTTATGCTTGTATTGAGTGCGAATCTGGTTACAGCACTTCAAGAAGCATAAAGTG  
GACTATATGGGACCAATGGTAATACATCTGATGACTTTTGGTCATGTGGTTTTGTGACGATTTTCAGGCTTTGAGACT  
CCCTGTTTTGTGAGGTGAGTAGGAAAAATCCCTCCTCTCATAACAGTATTCTTCACCTTTTAGTGTCTCGACACAAGAAC  
CGAAGCGCCGTCGATCAATAATCTGTATTCTGTCTGATCATATTACATTGGATAGGAAGCTGTGAATCTGTAAGCCTTT  
GACACAGTATGCCAGTATTTTCCCTTCCAACAGATGAAGAGAATATTCTTTGGAAAAATGATGTTAACCTGTTTAAATC  
TCCCTCTTAATTGAAGATCCTCTGAAAACAAAGACACATACGTCTCTTGGCTGTCTTTAAAAAGTTGTATGAATTACAC  
TTTGCTTCATCAACAGTCCAACTGGTAGCAAAAACAGAGAGAGAGAAAAAGCAATGATAGGAACTGTGCTTTCTGTG  
AGGACATCAAGCTAAGGATTAACCTCTGATGGGATTCTGCTCTGTCTTGTATCCAGGCGGATTAACCTGCCATTAACCG  
CTCATACGTTGAGAAATTTTTCAGTATCTCTATCTTATGGGTTGTGTTTAAATGAAAAGTAAAGTATTAATCACTTCAATC  
TTTTTATCACATAGGCCATATAGGACTTAGGATGGGCATAGGGCTGTACACTCTGTATATCAAGAAATAAAAGGGCAC  
AGTCTGACTTGGCAAG

>Sequ22843EST2

CGGAATACGAGCAACCTACACAAGATTCAACCATGGATCTTGTGCTGAATGTTGCCGACTACTACGTCCTCACCCCGT  
ATGTTTACCCTGCGTCGTGGCCTGAGGAATGGGCCCTGCGGCAGATTAACAGCTGCTGGTGTGACCAACCTCGGGG  
CTGCAATCCTCTACCTGGGCTGGGGGCCATCAGTACTTCTTCATCTCGACCACACTCTGATGAAACACCCGCACT  
TCTTAGAGAACCAGGTCCAGCGGGAGATCAAATATGCGATGACCTCTCTGCCCTGGATCAGCATTCACCCGTTGGCC  
TGTTCTTCGCTGAAGTTAGAGGATACAGCAAACTGTACGACAACGTCGGCGAATCTCCGCTGGGTTGGCCCGGCCTCC  
TCCTGAGTATGATCTCCTTCTGTTTTTACCAGCATGTGTATCTACTGGATTCATCGCTTCTACATCATAAGCTTA  
TTTATAAGCTGTTTACAAAACCACACCCTTGTGGAAGATCCCTCTCCCTTTTGGCTAGCCATGCCTTCCATCCAGT  
AGACGGCTTCATGCAAGGACTCCCGTACCACATCTACCCTTCTTTTTCCCGCTCCACAAGGTGCTCTACTTGGCCCT  
CTACGTTTTCGTCAACATCTGGACCATCTCCATCCACGACGGGACTACCAGCTCCCGGCGGTCTGACGAGCGTCA  
CAACGGCTCGGCTCACACACCACACCACCTCTTCTTCGACTACAATACGGCCAATACTCACACTGTGGGACCG  
CCTGGGAGGCTCCTACAGGCACCCGTCGGCTCTGATGGGGAAGGTTCCCCACGATCTGATCCGCAAACTTCAAGCAGA  
GGGAAAGCTGGGAGATGACAGAGTGAAGGCTAAAGGGCAAGTGAACGGACACGCCAGAGAGGAGTACATGTAAGGA  
GGAGTAACATTAGGGGAAATTACAATTAGCTGCTGAAAGCGATCCTACTTTTGTAAAGACAATGTGCTGCACCACA  
CTCAGCTAATTTGAGAGAGTGTACTTGCCTAATGAGATTTTGAATTTCTAGTGATAAGGCGCCTGACATCATCAGAG  
CGAGCTTTGGGACGCGACCTCCTCTGACGTACCAGTTATGCTGTATCAGTGACAGACTGACTAATGGGTCAACGCT  
AACTTTGCATTTCCACCCTCTGTTACGTCTCGAGCCTCGTATAAATACGAAATAAACTTGAATTTTACATAAAC  
GAGTCATATGAAAACAAACACAATAATTAGCCTCCTAGCTTACGCTGTTGTAGCTCACTGCATAAAGATTCACTTGT  
GAGCAACTAATGACAAATACCCAGGTGGAAAAACGCTGACATTTTCTTTTAAAGCTGCCTCCCATGCACAGGTAAG  
CTGGTGCAGTTTAGCATTTTCAAACCAGCATCTTTGTAGCTGCTCTGTTCCGGGGCTGAAGAAAGTTGAGTTACTGG  
GATAAATTTGGCTCCAGTAACCCAGTAACCTTTGTGTCAGCCACCGCTGCTGACACTAATTTGATATGGTGAGACAT  
ACAACTGTTCTGTATCTCAAGAAGTGACTGAAGTTTCTTGTCTTTGGTTTACAAGTTCTGATCATGTAGATATAA  
CACTGTGCATAAAGGACAAGACCATAAATAACAGATGATCTTATATTAGCATTTTATCAGTATGTTGTGCTGGTGACAG  
TGGAACATGCTTCTGTTAATTACATCACCTTTAGTTAGTTAATGTCCTTTCACTTTTAAACAGTGCACAGTTACACAC  
TGGAGGAACAGGGATGCAAACAGTGAAGATGAAACTTTTTTGGTTACATATTCATCACAGTTTATGCTTTCGCTCTG  
TCTGTAGAGGTGATGCATCATTACTATGAAAATAAAGCTAACCTTTAACCCCTAAAAAATAAAACCGACCTACC  
TA

>Sequ22852SNP3

CTGAAATCCGACCCAGTCTCTGGTGTGTGTCAGCCTGGAATGACAATGGCAGGGATGGCTATGTGGATCCTGGCAAG  
GCTAACCTGCTCTACCGGACAGACTTCTTTTCTGGCCTAGGGTGGATGCTACTCAGGGAGATGTGGGAGGAGTTGGAG  
CCAAAGTGGCCTGCTTCGTTCTGGGACGACTGGATGCGTCAGCCAGAGCAGCGCCGCAACCGTGCCTGTATCCGCCCA  
GAGATCTCACGGACTTTAACGTTTGGCCGGCAAGGTGTGAGTCTGGGTCAATTTTATGACAAGTACCTGCGTTATATT  
AAGCTGAATACCGAATTTGTGCCTTTCACCAAGTTAGACCTGAGTTACTTTGAAGGAGGAGACGTACAGAGAACTTTT  
CAGAAGGAAGTTTACAGTGCCTCCCGTTGTTACATATGAAGATGTTAAGCAGGGGAAGCTAAAAGGAGCCGGCCCTTC  
CGCCTTCAATACTCAAGTAAGGACAGTTTCAAAGTGATGGCCAAAACCTGGGAATCATGGATGACTTGAAGTCTGGA  
GTCCCAAGAACCGGATACAGAGGAGTTGTTAGTTTTCATCTCCAGAGGAAGGAGGATCTACTTAGCCCTCCTCCAGGA  
TGGACCCAGTATGATCCGACCTGGAGCTGATAATCCAGGAGAAAGCCTATGTACACTAGCCTTTTTGTAATCTCTAAA  
TATCAACTGGGGAGAGCATTCAGACCAAAGAGTGTCTTAAACTTTCTCTTGGTTTCAATGATATGACTCTAG  
TTCATTGTCTTTGATAATGCAGAATGGATTGTCCTCTTCTGTTGATAGGATCTTTGCCAATACTACTCAGGTCTTT  
TTCATTATTCCAAAACCTTTTCTTAAAGTGATAGGATGCACCTAAACAGATTGTTAGACAAAACCTGCTGTAATCCCA  
GAGATCTATTTTTATATATGCTAATTTGTGCACATGACATTCATTAATGCATTCATGCAATTACCTAATTTGCCACT  
TCTGATTAATATTTGCAATTTCTGGTAGCCTATATGAACTGTTTGTCTGGTATAAATATGAAATCATAATCTGTGGT  
ATGG

>Sequ22983EST2

AGGGGAACGATGCCAGGCTATCTGAGGCCTGAAACAGCTCAGGGAATCTTCTCAACTTCAAGCGTCTTCTGGAGTT

AACCAGGAAAAC TGCCTTTGCCGCTGCTCAGATAGGAACTCCTTCAGGAACGAAATCTCTCCTCGCTCTGGACTC  
ATCCGTGTGCGAGAGTTCACCATGGCTGAGATTGAGCACTTTGTGGATCCCAATGAGAAGGTACCCCCAAATTTCTA  
GTGTAGCTGACCTGGACATATTTATACTCCTCTAAGGCCAGACCAGTGGACAGTCTGCACAAATCATGAGGCTGG  
GAGATGCTGGAGCGGGAGTGATCAATAACTCCGCTGGGATATTTTCATCGGGAGGATCTACCTCTACCTTACTA  
AAGTTGGTATCGCCAAAAGCAAGCTGCGTTTTCCGACAGCACATGGACAACGAGATGGCTCACTACGCTGTGACTGCT  
GGGACGCTGAAGCCAAAACCTCCTATGGCTGGATCGAGATTGTGGGGTGTGCTGACAGGTCTTGCTTTGATCTGCTAT  
GCCATGCACGAGTACCAAGGTCCCTCTGGTTGCTGAGAAGCCTCTTAAAGAACCCAAAGTTGTAAATGTCGTCCAGT  
TTGAGCCCAACAAAGGAGCCATTGGAAAAGCGTATAAGAAGGATGCCAAGATAGCCATGGAGTATCTGTCTGTGTG  
ACGAGTCTTATTACAGAGCAGGAGCAGTACTTAACGAGTCCGGAGAGTTCACCATCGAGACGGAGGGCAAGACGT  
TCAAACTCACAAAGGACATGGTCAGTGTGAAGCGTTTTCCAGAAGACTCCGCACGTGGAAGAAGTTCGTTCCAAATGTAA  
TCGAGCCCTCCTTTGGCATCGGTAGGATCATGTACACCATCTTCGAGCACACATTCACATCAGAGAAGGTGACGAA C  
AAAGAACGTACTTTAGCTTCCCTGCTACTGTAGCTCCATACAAATGTTCCGTCCTGCTCTGAGTCAAAACCAGGAAT  
TCGTTCCCTTCGTGAAGGAATATCCGAGGCCATGACTAAGAATGGTGTGCTCACAAGGTGGACGACTCCTCAGGAT  
CCATCGGGAGGCGCTACGCCAGGACCGATGAAATCGGAGTGGCGTTTTGGCATCACCATCGACTTCGACACAGTGAACA  
AGACGCCACACACAGCCACTCTGAGAGACCGAGACTCAATGAGGCAGATCAGGGCCGAGGTGAGTGTGCTGTGTA  
TTGTTCCGGGATTTGGCCAACGGCACATTTGACCTGGGCTGAAGTGGAGAGCAAGTACCCCATCTTTGAAGGACAAGAGA  
CCAGCAAGAAGGACACGGTTGAAGAGTAAAAACTCACTCGTCTGCCAGCCACTCCGTGAAAAATCCACAGACTTGTTC  
GTATGCATCACCAGGAAAAGAAAATATTGCAACTGTATTGTAATAAGCTATAGTGGTGCACCGAGCCCTCCTTCTGTTC  
TCCACCCTGCAATCACTAAAAATGTCATGTATTATCATATCTAACAGTTGTGAAAAGCTTGCACAGGACTGTTGT  
TTCTTTGATGAGCAACATTTTCATCCATGTATGACCATGTGATGTTTTAAAAGGGAGAAAATGTAATCAGGTTGTTT  
TGAGTCGTGAGTGAAGGAGGCGTCCACCATTCCAGTTTTTCAGGCAGATTGGATTGAGATATTTAACAATTTCAATA  
AAACAGCCAGCACTTACTGGACACAGAAAACAAAAA

>Sequ22984SNP2

CAGAGTACGATGGGGAAGGAGGGGAGAGGCAAGTTAGCATGACAGAGCTGGAGGAGATGCTTGGAGTGCAGACATGT  
TCTCTGAAGGCTGTGGAAGAGCAGATGTGGAACCTGCTGGAGTTGGAGTAGGTCTTTCACAGTGGAGGGAACCAAGGAA  
ATATAGAAAAGATGGATTCAGAAGCTTCTAGTGAAGAAACGGATGATAAAGATGTGGATTGATGCTCCTAACGAA  
AGACGGATGATAAAGATGTGGATTGATGCTCCTAGCAGGAGGCGGATGATAAAGATGTGGATTGATGCTCCTAACGAA  
GTCAAGACAGTGAAGGGAACACTACTCTTGATGCCAGCCAGAGGAAGCTGATGAAGTAACACAGGAACTTCAGAAG  
ATGCGGTGAAATCAGCGAGCAGCAGTGAAGAGCAGGCTGATGTGAGGCGTTCAGGAGTGCAGGTGAGAATCTCCTG  
AGTCTTCAGCTGAATATGAGTCTGTGGATGAAGAACAATTTCCACCAGCACTCTGGTCTACATCCTCTCCACCACCA  
TGTCCATTATTAAGCTCCACTACGCCCTGTGGTCTCCAAGGTCACACAGTTACCTGGACAGGTGACCTATGTTCTTC  
AGGAAGACCTTGAGTCTCTCTGCTTGCCTGGAGATACCTACTACCTTCTCCACCTCTTGACCTCTGACCTCTTGT  
CCTGGATGGGCTCAGCTGCAGAACTGGTGTGCTGGGTGTCGGGGAAGCCTGCTTCTTCAGTGTTTACTACTGCACCTCAT  
CCATCCTGGGAGCCCTGATGAGCAGCTGCCACACTGGGGTCTCTGGCATGGGGACCCTGGCCGGTGACACAGTGGGG  
TATTTGGTGGTGTGCTAAATAGTACTTGGTGGGTGACCAAGTCTTTGGAGAGCGGCTGTGGGAGCAAAGCGAGGGTT  
ATGCAGAAAACGATGATGTCAGAGATGGGGGGTCAAGCCAAAGCTGTAGGTGGAGGGTTGGGTAAGCTGGCATGGAGAA  
GTGAAAATGCGTGGGTAATTTGTTTAGGCTGGGATGGGGGTTAATTTACTGGGATGGTGCATATGCTCACTGGTGC  
TGAGAGGAGGATATGGCAGGAGTCAAGTGAAGAAGGAAAGGACCAATCCCGATGAGGCCATCAGTAACAACACTT  
TTTCAAATGTTTTTCTCCAGTTTTGGTTTTGTAATTTGAGGTGAGAAAAAAGGAAAAACTATTTGAAGGACACTCA  
TTTGATATGCCTTAGTTGTTATAGAAGGATAGCCACAATCAAATTTGATATATGCAGGTCTTACACTTCACTGTGGA  
AAGCTGGCTGTCCAAATAATCTGCTGTACTTGGAGCTTCCCAACAGTGAATTTAAAAACACTGTCCACACTGTGCT  
TTTGGATGTAATGTTCAAGACTACTCTTGTATGATACTTTGGTTTTGTGTGCAAGTTTGAATAAAAAGAGACTGCTGGC  
TTGCCATTGTA AAAAGAACAAAAA

>Sequ22996EST2

ACAGTTGGACACATCCTCAGCGCAGCCAGGCGTTAGAGGCGCTGGTGCCCCGGAGAGGAGCAGGAAGACGGAGGACGA  
CTTCTTTCTGGTTTTCTCAGCAACAGGGGACGGGCGGAGAGAGGAGAAAGATGCCAAACCGATCAACGTGCGCGTAC  
CACCATGGACGCTGAGCTGGAGTTTGCCATCCAGCCAAACACGACAGGCAACAGCTCTTTGACCAGGTGGTGAAGAC  
GGTGGGTTTTAAGGAGGTTGTTCTTCGGCCTTTCAGTACACAGACAGCAAAAGGCTACGTGACGTGGCTCAAACTCA  
AACAAGAAGGTGACCCAGGATGTGAAGAAGGAGAATCCGCTGCAGTTCAAGTTGAGGCAAAAGTTCTTACCAGAG  
GATGTTTTGTTCTGAGGACTGATCCAGGATCACACAAGCTCTTCTTCCTGCAGGTGAAGGAGGCAATCTGAACGAT  
GAGAACTACTGTCCCCAGAGACCGCGTGTGCTGGCCTCGTACGCTGTCCAGGCCAAGTACGGAGATTACAGCAA  
GACATTCACAAGCCCGCTACCTGGCCTCCGACCGGCTGCTGCCACAAAGAGTCTGGAGCAACACAAGCTGACGAAG  
GAGCAGTGGGAGGACAGAATACAGACCTGGCATGAGGAGCACAGAAGCATGCTCAGGGAGGATGCAATGATGGAGTAT  
CTAAAGATCGCTCAGGACTGGAGATGTACGGCGTCAACTACTTTGAAATCAAAAACAAGAAGGGCACAGAGCTGTGG  
CTTGGGGTCGACGCCCTGGGCTCAACATCTATGAGCATGAAGACAAGTTGCTCCTCAAAGATCGGCTTCCCTGGAGC  
GAGATCAGGAACATCTCCTTCAACGACAAGAAGTTTGTATCAAGCCCATCGACAAGAAAGCTCCAGATTTTGTGTT  
TACGCCCTCGGTTGCGGATCAACAAGCGCATCCTGGCGTTGTGTAT

>Sequ23093EST2

CGAACAAGTTGCAGGACATGCTTGTATGGGTTTCATCAGAAAATTTGTGCTGTGTACCGAGTGTGACAACCTGAAACTG  
ATCTGCATGTCAATCCCAAGAAAACAAACCATTGGCACTTCTGTAAAGCCTGTGAAAACCGCGGCATGCTAGACACCA  
GACAAAACCTTCACCTTTCATCCTCAAAAACCCACCAGAGCAATGAGAGTGGATCTGCATCTGTAAAGAAAAGAGA  
AGGAGAAGAAGAACCGCAAGAAGGACAAGGAGAATGGACTCTGGCAGTGGCGAGGCTGGGAACCACGACAACCTTTGAC  
GCCCCCTCAGGCTGTGGACGGAGACGACGACGACGAGGACTGGGCAGAGGAGACCACAGAGGAGGCGCAGAGGCGGCGA  
ATGGAGGAGATCAGCGATCACGCCAAGAACCTGACGCTCAGCGAAGACCTGGAGAAACCCCTGGAGGAGAGGGTCAAC  
CTGTTCTACAACCTTTGTGAAAACAAAAGAAGGAGAGTGAACCATCGACGGGGCTGAAAAGGAGATCTTGGCGGAGGCG  
GAGCGTCTGGATGTGAAGGCCATGGGCCCCCTCATCCTCAGCAGCTGCTCTTCAACGAGAACATTCGCGACACAGATC  
AAGAAGTACAAGCGCCACTTCTCGGTTCTGCCACAACAACAAGAAAGCCAGAAGTATCTGTTGGGAGGCTTCGAG

TGTGTGCTGAAGCTGCATCAGGTCCAGCTCCTGCCGCGGGTTCCCATCATCCTCAAAGACCTGTACGACGCTGACCTG  
CTGGAGGAGGACGTCATATTCGCCTGGGCAGAGAAGGTTTCTAAGAAGTACGTCTCTAAGGAACTTGCAAAAAGAATC  
CACGCCAAGGCTGCTCCTTTTGTCAAATGGCTGAAGGAGGCGAGGAGGAGAGCGAGGGGACGAGGAAAGAGGAGGAG  
GAAGATGATGAGAAATGAGAGGTGGTGTACTCGTCTCTGCCCAGCTCAAAGTGGAGACTGTGAAACCAGACACG  
CCTGAAAAAGAAGAGGACATTGACATTGATGCGATCTGAGAGACTCGGATGATGATGATGATGATGATGATGCTT  
TTCTTGTGTTGTGGCTTTGACTCACGATGCCCTGTAAGACCTAAATGGCTGGCTTTCCCTCCTTTACTACCTGCCCC  
CACCACCTCATCCTTCTTCCCGCCCCAATCCTGCAGCCCTCCTCTGCTTTGTGGCATGACTTAACATAGCGCTTTAC  
TTGCTGCACATTAACCTCTGTAATTTTGGAGATCTATTCAGTTGATGAAATGAAGTCGCTTTGGGAGTTTTAATCATGGG  
TGTTTTGGGGGATCATTTTACTGCTACTTTTTCTTTTTTTCTTTTTTTTTTGGTCCCTTGTTATTTTTCCAGTCAATA  
AGATGAATGTTTGTATCC

>Sequ23165EST2

AAAACAAAAAACAAAAAAGATTCCCCACACATGGTCTCCAAAATGTTGGTTGCCTCTTCAACGGTGTAGTCTGGAT  
AGTGTACAGTATGACATTTGTGTCTGTCAAACCCTTCCCGGGAGGTGAAATTTGCCTGTGAAGCGTCCATGGTTGTGC  
AGATCAAATGGACTGATTGCCTTCTGATACCCAGCATGTTGCCCTGCGCTATCATCTTAAAGGTCCAGGGATTCTGG  
TTGTTCTGCTCCATATCCACCTGTTTCTTTTGCAGGGCTGCTAGACTCTCTCTGCTCATTACCTTGGCAGGGAAGGGT  
AGCTTCTTTGCCACTTCAGTCAAGATATGCTCAACCTCCCCAGCTCCACCTTTCTCCCACCTCCACGATGAAACGA  
CCATAGCGGACAGGTGTACATAGTGGTCGATGGCTCCCTTCCCCACCCATGCGCTGACCCAGGCCTTTACGTGTAA  
TTGGCTTATACGGGGCATTGATGCGCCAGCGGGCAAATGTAGTCCGGGAATCCATCTTGGCGTTGACGGTCAGACGCA  
TCATTTCTATGTGACCCCAATGGAGATAGCCTCCTCCCATGGCCACAATAGCATACTGTCTGTAGTGAAGGCATTTG  
CTGCCTTAGCTTGGCCTTGGATATCGCGCAGCTTCTTCAATTTCTTTCCAGCCCTTTAAGGTTAGGAACCTTTGTTCA  
TAAACTTCAGTTTGGGTTTCTCTGGCAGCACCATCACTGTAGTCTGGAGGGATTTTCATACGTTT TAAACCCAGCAG  
CTAGGACTTTCAAATGGTTGTACAAAGGACCTTGTGCGGTGACCGGGGGCTTTACAGATACCGGTCAATCCGCCGACAG  
CAGCCTTGACGAATGAAAAATCTTGTAACTTGAATGGGGCATAAAACAAAAACCGACACTTCGTGTGTTG  
ATATAGGAGCATTTTAGGTTGGTTAACTAATGAAATGTTGTGGACACCACGCTCTGTACAAGGTCG

>Sequ23258SNP2

TGGATGACAAGGTGAAGGAAGTGAAGGCTCAGAGAGGAAGAAGGCCAAGATCCTGTCTTCTGTCTCGAAGAGGGACT  
TCATCGACGTGCTGAGGAGGACCGGAGGAGGCGGAGGCTCCGCCAAGGCGCAGAGGGAGGAGGCTGCAGCAGATGA  
GAAGCCTGCCTGGAGCGTCTCAGAGACGACTACATGATGGGGCCACCATGAAGGACTGGGACAAAGACAGTGACGG  
AGAAGATGCTGATCCTCACACAGGAGGGGGGGCGGAGGAAAGCGATTTCAGACTGACACCATCCATACTCACTGAAGGGA  
CTGTGTGGTGCCTTCAGGGACAGTCTGGGCAACACAAACCCTGACCTGCAGAGACCAGCAGCTCAGAGAGGACGGAGA  
AAGTGTGAAATGCTCCTGACTGATAAACACATAGGACAAGCTTCTCTCGCCGGTTCGAGTACGATGTGTTCTGTTA  
CCGTCTCCACTCCGACCAGGTACATGTGGAGACGGGATGTAACAGATGAGACTGGAGGAAGTGAAGAGGGCTCC  
TCCAGGTTTGTCTCCTGCTCCATCTTGGAGTCAGAGTCCATCTGCTCCTGTTTCACTCTGCAAAATGTTTTCTGAGTG  
AACGACCTGTAACTCTGTAAATAGACATGTTTTCTACTATAATGGTTGAATAAACAGCCAGTTCATGTATCACATAA  
ACGAAAAAAAAAAAAACCGACCTACCCTAATAGT

>Sequ23460SNP2

ATAGGGAGGTGCTTTTTTTTTTTTTTAGGTTCTAGCAGGTCTTTTTATTTTCATAGGAACAAGAAAAGATGCCGGTCCA  
GACCTGCTTATCACTCACCTGTGTGTGACCTACAGTGAACATTAGAACTCTAGGAACTGGGACAGTCCATTCTTTTG  
GGAACAGTAGTTTACTTACTTAGGTACTTCCCGCAGCTTTCAACCACACCTCAAGGCTTTCATCAGCACTTTGCTCAGT  
TTTCTGGGGTTAGTTTAGACATCATCATGCGACCTACAGTAAATATGGAACCTGGGTACAGTGCCAACACGCAGTTG  
TATGGTTGGCTCTGTTTCAAGATGGTTGTCCACTTATCCCGCCCCATGACCTGTAACCTTAATCCTGATTTGGTTAG  
AGGACTAGGACGGTCAAAGTCAATGGTGTCTGGGGACGCTGGAAGGAAAATCTTACAGTGGCTGACAAAAGGCCAAC  
GCGCTGCAACGTTCCAAAACACCTCCACTAGGAGAAAACAGCTGCAACCCAGAAAAGATGCAGATTCAAAACACACA  
CGAAAACACAAAACCAACACAACAACAGAAAACATGCTACAAATGAGACAATGTGCTGCAGGGAGACAAAACCAACACA  
TGAACAGCAAAACAGCTGCAAAACACAGAAAAGAACACAAAACAGAAAACCAACTGCATATTGACAACAGAA  
GAGCTACCAAACTCTAGGGAACACCCTGAACACCTTGAACAACAAGCTTAGAAGCTTCGACTGAGAGGCCAGACCTA  
CGACTGGACCTTTTACCCTTTTACCAAGCAAGAGAATATGAGGGAAGAAAAGATGAGATGACTTCAAAGGGGTTGTGTT  
CTTTTTTACATTTGGCCATAGTTTTTACAATATTATAAAAAGAGCAACAGAAAACATAGCAAGTGTAGCGTTAGCTTA  
TACACAGTCCATGGGTTTTTCCACGTAGCGCTCCCCCAGAGGCTGGAGCACCTCTGTTGTGTTGTCTTTTTCTCTGT

>Sequ23511EST2

ACGGAACGTGTTCCGGTTGGTGTATGTCGGTTAAGTGTGCATGCCGCGGAGTGTAGCCTCTGTTAAAGTTGTAGCTGGA  
GCAACACCTGAAACGCCGCATGGGGATCCTGGAGAAAATCGCGGAAATAGAGAAAAGAAATTTCTCGGACACGAAAA  
ACAAAGCCACTGATACCATCTGGGTTTGGCTAAAGGCCAAGCTAGCCAAATACAGAGCTCAGCTTCTGGAGCCCTCCA  
AGTCAGCGCGCCAAAAGGCGAGGGCTTCGATGTATGAAATCAGGAGATGCTCGTGTGCACTCATCGGTTTCCCCT  
CTGTGGGTAAGTCCACTTTCTCAGTCTGATGACATCAACAGCCAGTGAAGCTGCTTCTATGAATTCAGCACCTCA  
CCTGCATACCTGGCTCATAGAGTACAAAGGGGCCAACATCCAGCTGCTAGATCTGCCAGGAATCATTGAGGGTGTG  
CTCAAGGTAAGGGCAGAGGTGCGGCAGGTCAATTGCTGTTGCCAGGACAGCAGATGTTGTATCATGATGTTGAATGCTA  
CCAAAGGAGAAGTTTCAAGAAAACACTTCTAGAAAAGAGTTGGAGTCCGTTGGGGATCAGACTCAACAGGACGAAACCCA  
ATATTTATTTCAAGCCCCAAGGATAGGCGGCTACTTCAACTCCACAGTTCCTCTCACCCACTGCTCAGAGA  
AGCTCGTTTCACTCCTTTCACGAATACAAAATCTTTAATGCAGAAGTGTGTTTCAAGGAGGACAGCAGCTCCAGACG  
AGTTCATCGACGTATCGTTGGGAACAGAGTTTACATGCCTTGCCATATATGTGTACAATAAGGTGGATCAAATCTCCA  
TCGAAGAAGTGGACCGCTGGCTCGCAGACCTCACAGTGTGGTCATCAGCTGTGGAATGAAGCTGAACCTGGACTACC  
TTTTGGAGACGCTGTGGGAATACCTGTGCTGATTTGCATTTATACCAAGAAAAGAGGAGAGCGCCAGACTTTAATG  
ATGCCATCATCATGAGAAGAGGAGCAAGTGTAGAACATGTGTGCCATCGAATCCACAGAACCTTAGCCAGCCAGTTCA  
AATATGCCCTCGTTTGGGGAACAGCACCAAGTACAGCCCACAGAGGGTCGGACTGACGCACATCATGGAGCACGAGG  
ACGTCATCCAGATCGTTAAGAAGTAAAACAAGCTTCTGATTGGACGAAGGACAGGCTGACGAGGAAGAGCTTAACTGG

GGTCGGGGGGTAAAGTACTGTACAGTAGATATACAGCAGTGGAAAATAGCCGCATTCTTATTTTGTATATGATCATAA  
ACAAAAGCAAAACTGAAGAGAGACCAGATCTTATGGTTCTGGACGGAACTGGTTTATTTTACCTTTTAAAGATAAAG  
AAGATGCATTGATTCTAAAAAAGAGAAAAACGGGGGAAAATAAAAGTCCAATAAAAAACAAGTAAAAAATAAAAAACA  
AAAACCGCTACCTA

>Sequ23896EST2

GGTTTTAAATAGCAGGCGAGAGCTGCAACTCCTCACTCTCCTCTCTGAGCAGAAACAGCATCCATCATGACCAGCTA  
CTCTTCCCTCCAGGTCGGTGAGGACCAGCACCAGCAGCTCCGGCGGCTCCATGGTCGGCATGGGCGGCAGCAGGCGGGT  
GTCCTCCATGAAGCTCGGCAGCGTGTACGGCGGAGCGGGAGGCTCTGGCGTCCGCATCTCCTCCGCCTCCATGGGTGG  
ACGCCCTCGGCGCCGGCTGAGCGGAGGGTACTCGTCCCTCATGAGCTACAGCGGGTCCGGCATGGAGGACAGCCTCAT  
CGGCAACGAGAAGTTCACCATGCAGAACCTGAACGCCGCTGGCCACCTACCTGGCCAAGGTGCGCTCCCTGGAGAAG  
GCCAACGCCGAGCTGGAGCTGAAGATCAGGCAGTTTGTGGAGAGCAAGGTGCGCCCCACCACCAGAGACTACAGCGCC  
TACTTCCGCCACCATCTCTGACATCACCGGCAAGATCCAGAACGCCATCAGGCTGAACGGAGCCGTCCACCTCAGCATC  
GACAACGCCCGGCTGGCAGCAGACGACTTCAGGACCAAGTTCGAGAACGAGCTGGCCATGCGTCAGTCGGTGGAGGCG  
GACATCGCCGGGCTGAGGAGGGTCTGGACGAGCTGACTCTGGCCAGGACCGACCTGGAGATGCAGATCGAGGGTCTG  
AAGGAGGACTGATCTTCCCTCAAGAAGAACCACGAGGAGGAGCTGCTCGCGTGCCTCTCAGATGAGCGGTGAGGTC  
CACGTGGAGGTGGACCGGCTCCAGGAGATGACCTCACCAAGGTTCATGGCTGAGATCAGAGAACACTACGAGGCCATC  
ACCGCAAGAACCAGAGAGAGCTGGAGAACTGGTTCCAGACCAAGTCGGAGGCTCTGAACAAAGAGGTCTGCTCACTCAG  
ACCGCCACCTTACAGACGTCCAGGTGAGAGGTCACAGAGGTCAAACGTACGCTGCGAGTCGCTGGAGATCGAGCTGCAG  
TCCATGTTGGGCATGAAAGCGTCACTGGAGGGAACCTGGCCGAGACACAGAACCCTACGCCATGCAGCTCTCAGGA  
TACCAGATGCAGGTGTCGTCTATGGAGGAGCAGCTGGTGCAGCTGAGGGCCGACCTGGAGCGGCAGGGACAGGAGTAC  
AAGATGCTGCTGGACATTAAGACGCGACTGGAGCTGGAGATCGCCGAGTACAGGAGGCTGCTGGACGGAGAGGCGAGC  
AGCAGCATCCGCTCCTCCTCCTCGAGCACGAAGACCACACGGGTGGTGACGGTGGTGAAGAGGTGGTTG

>Sequ24343SNP2

CAGAGAAGAAGAAGCTCCGGAAGCAGGCGGTGGTAGCAGCTAACGTTAGCATCAGATGTTCCGGCGGAATAAATTTGGT  
CAAATATTCGTTATCTGAGGTTCTGATGTTTAGAACTACACACCTTAAAAATGCGCGGAACCATACCCGCCACCTG  
TTACCTGCTAACGGGACAGGGAATACACTGACGGGTCCTCAGTCCCTGGTTCGTCAGTCCCTGGTGCCTCTGATGATAT  
GAGCAGCTCTGCTCATAGGAGGAGGAGGACCGCAGGAAGTCTCTGGTTTCCAGACCTAGCAGCAAGAACAGCAGAGC  
AGCTAACGCTAACAGAGTGGCTAGCAGGACGGCTGGCAGGACGGCTGGCAGGACAGTTAGAAGTACAGCTGCAGGAT  
GGCTAACGTTAGCAGGATGGCTGATGGTGACCTTGCCCCCCCCACAGAGACCATTGATGTGATGGACAACACTGAGGA  
CATTGTGGAGGAGGTGGTTGATTTGACCTGTGAAGGATCAGAAGCTGCTGTGGTTCGACCTCACAAACAACGACTCAGT  
GCTGCTGCTGGATGAAGTCTCAGAACAGAAGAGTCCCCACAGGTGAGAGCTACATCGTCAGCAGTGTGAAGATGA  
GGACACGCTCCTGTCTTAAACGCTGCCATAGTGTCTCTGTTCACACTTCCAGGTCAACTCCGGGACGATCAGCTG  
TCCCGTTTTGTTGGACTCGTACTCTGAGATCGTCGACAGCGCCGATTGGTTGTATCCACTAAATGTGGTTCACGTATT  
TTGCAGTCAGTGTCTGAGAGACGCTCTGACATCATCACACACCTGTCTTAACTGCAGGAAGAGACTCACCCATCGCCA  
GTACCACCCCTCTACATTTGACATCACTCTGACATCACACACATTTGCTGCTGTTGGACAACATATTTCCAGTG  
ACATCATCAGTGACATTTATCGGATGTTTTTGTGCTGAATTTTATTTTAAATTTTTTGTGTTTTATCAGAAACA  
TGAACCTTCAGTCAGAGCTGATTGATTATTGATATTTGATTGATGTCATTCCTCAGTTTTCCAGTTCATTCTTTG  
TTTTCATCTGTTAAATGTTTATTTTTCATGTGTAAAAGTAGAAATTAATAAAATACATTTATTGACTGTG

>Sequ25437EST2, Sequ25437SNP2

AAGAAGAAGAAGAAGGAAAACCTGAACATAATCTGATCTACTTGTAAACAAAGAAAATGGACACACGGTTCCTCGAGGG  
AAATCCAACATCTTGAGCGGTGCGTGACCCGACCCAAGACTGAGGTGAGCGTGCAGCGCTTTGGCCTGCTGTTCTCA  
GAGATGGTCCAGTACTGTGAGCCGCTGTGTACTCTGTGTGAGCTGCAGACACGCTGGCCGACATGGGCCAGAGT  
GTAGGAGCCAGCATGCTGGATGTGCTGGTGTCTGAGAGAGAAGAACCAGGGAAGAGGGAGACCAAAAGTCTGAACATGCTG  
CTCTTCATCAAAGTTAACGTGTGGAAGTCTTTATTTGGGAAGGAGGCTGACAAGCTGGAGCAGGCCAACGATGACGAC  
AAGACTTATTACATCATAGAAAAGGAGCCGCTTATCAACGCGTACATCTCTGTTCCAAAGAGAACAGCAGCTTGAAC  
TGTGCTGCCTTCACTGCTGGCATCGTGGAAAGCCATCCTCACACACAGTGGCTTCCCTGCCAAGGTCACTGCCACTGG  
CACAAAGGCACACTCATGATAAAGTTTAATGAGTCGGTCATTGCCAGGGACAAGGTCTTTGGATGGCAGATAAAT  
AAGACTGGGAAAAGTGGCTGGTTATGTTAATCAATACAGGATGATGGTAAATCATCCAGGTCAGGCTGTGTTGTT  
CCTGAAGTGTGGGTGACTGACTGAATTTCTTGTGGTAACTGATGAGATAGCAACTTCATGAATGGATAACCAACG  
TACTGAGCCACATTTAGAGCTGAAAAGGTGCAGCTAACTGGTTCAATCCCAGGGTTTTGTGGATCATCTCACTCGTG  
TTGTACCTCATGAAGGGACACAAACTTGTTTAGCTGTAGATCACTTAAAATTTGTAGCTTCATGTACATTTTTTACAT  
CACAGATCATTCAGAAAAGATCAATATGTT

>Sequ25975EST2

GCTATCTCGACAAGACTTCGTTTCGTCATTTTTGAAAAGAACAAGACGGAGCAGATACAGAGTCTCTAAATGGCTGCGAGG  
AAGTCTGGATCAGATGCATACAACAATGGACCCATCAGCTACCTTGATGATGTTCCCTTCAAATTAATGAAAAATTC  
CGCTGCCAGCCAAAGTGGGGGTGCCTGTTGGCTTCTGCCTGCCTGACTGTGGCTCTTTGCTTCTGGACACACAGTAT  
GACTTTTTCTTTGGAGAGGCGAAGTGTGCGTTGGGGGTTGAACCTGGCTGAGGCCAGAGCAGCAGAGGCCAGAGCAGAAG  
AGGCAGCAGCCAAGCAGGAGGCAGAGAATAGAGAGTGTGGCTCAGGCCAGGACATTTGATGGTGGTGGAGGGGAAGA  
TACCCCGTCTGCTGCAGACGACAGGACCTTACCACAGCATTGAACCCGTCCTGGCAGGCTGAGCCATAATG  
CCATCCTCACCCACTGCTGCCCAAGCCTTGGCCCCAGAAAACCCAGCCGAGCACTCCTCAGCCACACAGCCTCA  
ACCTAGCTGACTTTGAGCGGGAAGAGGACCCATTTGACAAGTTGGAGCTCAAAACTTTGGACGATAAGGAGGAGCTCA  
GGAACATCCTCCAGAGCCAGCCCCAAACCTCAAACATCCTCCTTCTGTATCCCCAACAGAGGTCTCCAGATGGGGTC  
AGTGTACGTTGAAACAGCCCATCTCCTCCCAGCATCAACACCAGCCTCCCGGCCAAACCAGGCTTTACCCACAAACC  
CAATGGGTTGGTTGCTTGGTGGACATGGACAGAGTTGGGCATCCCTGGGAGAGTGGGGTTTTGACACGGATGACCCAG  
CATGTAACATCCGCTCTCTGACTTTTTCCCAAGCTCTGACTCTGGTGACCCAGAGCCAGTGAAGTACTGCCACTCC  
CTGCACCCATCTCTGCTCCAGCAGACAACCTACCCAATGGCAGTCCGCGGCAATACCCAAGACCAAGTTATTGTTG

CCCCTGAGCCACAACCACCCAGCCACACTAAGAGTGGCACACTGAAACTGGCCAACCCAGGGTCAGGATCTGCTGGTT  
TGCCGTGTGGCGGAGCCCTGCTCAGCATGACCCCGAGCGAACGTCAGTGTGTGGAAACCCTTGTAGGCATGGGCTACT  
CTTACGAGGGTGTGCTACGGGCCATGCAAAGACAAGGGCAGAACGTTGGAGCAGGTGCGACTCCCTCTCACACCAATGC  
ACAGAAATCTGGATTCTCAGCTACTTACTGTCCGACATGTGAAACAGTTCATTATTTGTGTGGTTGTGCAATTGTGT  
TCAGTGACGCATCAATGCATCTGT

>Sequ26609SNP2

AAATATACTTTTAGTTTTATTTGTAGGACGTTTCTCCACGCAGCAAACAGAACACAGCAGGACGGTAACAGCATGAAC  
ACCGATCAATAGATCAGCCAATAAATCAACCAATCAGTCTGAATGATCGGGCGTGTTCGCTCGGAGGATTTAAGGATC  
GTTGGGTGAAATCATTCAGTTCTGCAGCAGCTGGTTTGTAGCAGCACAGACTCTTTTATTACTAACATCACCGTTCTG  
TCAGTTTGTCTCTTTACATTCAGATTTCAGATTTCAGTTTTTGGACAGAGTTGTTGAGTGACAGGGTGCCTTCATTTAT  
CCATGTCAGCGTGCCGCTTGTTTTACGAAGCCGCAAGAGAAGAAACATGAAGATAATCAAAGCGCTGCATTCACCTTCA  
CTGTGTTTGTCTCAGTGATCAACCTGTGGTGAACCGATCTGATTGGACAGGGTTCAGAGACACACCTGTGACTCTCTG  
TGGTAAATGATTCAATCAATATAAAAACACAGTGGGATAAAAAAAGTTCTGAACTGGTATGTTTTGTTTCAGGTGCCACA  
TTGAGACATTAGTTTCAGTCTGACATAAGCAGCACTTCTGTGATAACGTGAAAACAGGGTTCAGGTTACCTGTCTGA  
GTCCAGCACTGAGACCGACAGGTGTGCAGAAAAACAGTGACAAAAAACGTTCTAGTAGAAAAAGCTAGTTTGTGTT  
TTTATATGAGTAAAAAGTTTTGTTTTGTGTTGAAGCAGAATTATCATATAATCACATAATCACATCGTCTGTAATAATG  
GATAAATTCCTTCAACGTGAAGCAGAGAAAATCTTCCAGCATCTTAAATCCACCTGGTTTCAGTCGTGTTGTTTCGTC  
CGGCTCGTCTTTGGCGTAACGTTATAAACAGCTGGCGTTTCAGTCTCAGCTGTCTGACAGAGATCACTCAAGGCGGGT  
TAGAAAATAAAAACTGATCCAGCAGAGACAGACACGGTCACTGGGACAGAACCAGGCGCACAGTTCACTTTGAGCCA  
GCAGAGTCCCGTAAAGACCCGATCCTCAGAGAGTCTGTT

>Sequ28107SNP2

GAGAACACGGTGTCTTTTATTTGTATTATGTCTTCCAAGTTCTAATTAAGGATTAACAACAGTGTGTTGTTGTTAGTCT  
AATATCTTTAAAAATCACAGCACAGCATATATATATATATATTGATTAAGAGGGGTAAGTGAATTGTAGAGTTTCTCA  
ACACCACAATTTAATTGAATGTTTTATTATCCCTTATTT

>Sequ28112EST2

TTTAACTTTTTTAAATGGCATTTCATTTTACACTGCACGGAAAAGTTGCCACAAGCACCTTTTGAAAAACACGTCTAC  
ACCTTAAATATACATCACAGCAGCCATATGGTGAGTTTCCAAAACAGGTTTAACTACCACAATGAAATCGCTGTACTG  
TCTGAAAGCACGAGCAGGAGTCTGAACTGTGCAAAATTAACAAACCGTTGATGTGCTTTTAAACAGATGTTTACAGTC  
AGCAATTCAGCGATGACATTTTTCTTTGTGAATGTACAAACATGTGCCATTGCGATGTGAACATGAGGTTCATGCTTAA  
ACAAAACAACACACTTAATATCATGCTTTCCGCTCTTTATAACACTTCAGTAGCATTCATTTCCCTATAGTGCACCTGG  
ATTTGTAGAGTGAAGCTAGATTCCACAACATAAAAACATAGGTTGACTGGTGTGACAGATGAAAAGCCTCAGTGTTTTAG  
TGTGTTTTAGTGTGTGTGTGCGTGTGTGTTGTGTGTATATATTCATCCTATACACCCTTGTGTGATAAAGGGTACAAG  
GTACTGGTTGCTAACAGATAGTACACCGTGGTTCAGTGTCTGCTTGCATGAGTACAGGTGATGGTCTTCCACATGT  
GGGCAGCTGCTCCTCATGAACTGGGCCAGGCGGAGCAGGTACTCCAGGTTGTGGCCGCTTCCCACTGGACACAGCG  
ATCTGGGCGCCGATCGCCGCTGGGCTGGCCCTCCCCAGATACAGGGGGTGTGCAAGTGGCAATGTACACCTCAGTGGC  
TGAACCTGGTACTGTTCTCCCTGGGGGAAAACCTCCACCATTTGGTGTGATGTAGCCACCGCAGACTGCTCGCCG  
ACGTCGAGTACTTCAGGGACTCCTGAACTTGAGTGCCTGTACCTCGAATGCCACACCCCAAGTGTCTCGCGTCATCA  
TCTTCAATCAGCGTCACCACCTTCCGGGCAACTCGTCTGTTCCCGGATGGAAGTTGTCTCCGTGCCAGAAACGTCTC  
TTGTAGCCTTGAATGTAACCGACCTGGCTCCTCTTGTACCTAAAGTCCAGGCTTCCACACCAGTGACCCGTACCCGAAG  
ATCCACAGGCTGTTCTTCCCGCGGTGATGTCTTGAGGCTTCATTTTCGATCGGTAGTTTTGATGACGTTTCAGATGAAT  
CGATGGCTCACTCTTCACTTGTACTAGCTAAGATGACTAGCTTGCATGCGTTAGCTTCCCTCCGGTCCAGGAGC  
AGAGGCACCGGCTGGCTCGCAGGTATACCGCAACGGTATTTGAGCCCACTGCTTGGCAGTTGCGAAGATGGAATTA  
CGCAGTTGATTTTGCCTTGCACGATGACCTGCGGTTGATGAGGTTGCCGATTTATGCCTTAAAAATCCATGGCAGC  
CGCTTCGGCTTCAGATCAGTGGACGAAAAAAA

>Sequ28119EST2

TACTTAGTTAGGGTAGGTTTTTCGGTTTTTTTTTTTTTTTTTTTTTTTTTTTTTCTACTATTTTATTTCTTTTCATTCTCATA  
AATGTTTCCCAATAACTGTAAATGTACATGACGATTAATAAATTAAGATGTACAAGTTCTTCTTGCAAAAGAAGAGAACA  
CATTGTGTTAGAAAGCTGGTTTTCTTTACGATTCACCTGTTTAAAGAGTTGCTGTGTAACAAATTTAGAAAGGTTTT  
CTACATCATAATAAAGATGAGTTTTAATGGGGCGTATTTTGTAGTGTGTTTACTCAGTCTTCAGGCCCTCCTTGATGAG  
GTTGAGCTCATAGCACAGGGTCTCATAGCGATATGCCATACGGATCTGGGCCAGCTGGTCTTACGGATGTGCTGGCC  
CTCTGGACCTCCTTCAGGTAGTCGTGACCCAGGACAGTGCAGCTTCTCCTCATGAGACATGGCACTCTGCAGCACACT  
GTTCTGGAGATCTCACACATGTCGACAGGTGCTGAGCTGAAGACCTGGGCTGCAATGGCGTACTCTTCCATGAGGGG  
TTCTTGGTGTAGTGAACATGCAATGGGTCGTCGGTGGACAGAGACAGACCAGGCCTTTCTTGTGGAACCTCCAGCAG  
CGGTTCTTGGGCTACTCCAGGAACAGGCTGTTGTTGCTGAGGGGGGACATGGCGATTGGGATCTGGGTCAGGAAGTA  
CAGGTACTGCAGCACAGGGCTCTTCTTGTAGGTTTCAGGCCGTGAGAGATGTTGTCAGCGGTTCATGAAAGGAAGCCAGCAG  
ATGGGTGACGGCACCGGCTCGCCGAGTGAAGCCTGAACATGAACGTTTCATCCCTCTGTTTGGCGAGCTGGTT  
GAGCACAGCGATGTTGCATACATGTAGTAAATGTAGTAGGTGTAGGAGGGTTCTTGACGATGTCCCACTCCTCTGG  
CTTGGGGCTCTTAGTGCAGAACATGTGGCCGCTGTGCTTGGACTCATCGTCCCACTGTGCAAACTGTACATGCTT  
GAGGAAGATGTGAGCTCTGGGTTGGACAGTGGGTCGATGGTGGCCTGGAACACGGGAAGGAAAATGTTCTCCAGCAT  
CTTGCCGAAGTGGGGCAGGAAGTTCTGCTGCTGAAAGATGTCGTAGATCCTGGGTACTTGAATCATCCATTTGAGGTT  
AGGGGAGAAGACTCTGTGCTTGCAGAACAGCCGAGAGCTTGGTCCACTCATTTGGGGTTCAGCCATAGATGGAGAG  
ACGAGGCTCAGCGTACTGGTACTTAGCATCCTCCAGGTCAGTGGCTACTTCCCTGATAATGGTGGCAAAGTACTCTCC  
GTTGATGTGGTTCTCTGCTTTCAGGTACAGGTGCGCAGCTCGCTGGCTCCACGGGGTGTACTTGGCATTGAACTT  
ATCAAACGCTGGAAGGTTTGTGCGCCAGCGTGCACATCCAGTGTGACAGTCCAGTTCAGGTCATAGGGGTGCAGGTTGAG  
CGTCTGAAACAGCTCCCTCATGGTGCCTCCCGACCTTAAAGTTGTGCACGACGCGGTTCAGCGTCCACGCGGTAAGA  
CTTCTTGATGAAGCCAGCAGGTGCTTCTGGTTTCATGCAGGCGGACGCTGGATGTGGGTGTCGACCTTCTACAGTT

GTAAAAGTCCCTGTGGGGTTCATCTTCAGCTCCTTCATCTCCTCCATCTCATTTCAGCATCTCATGCACGTTGAACTT  
GGATGTGAGGAACCTTGAGACGGCGGTGGGTGTAAGTCTTAGTTGGGCCCTGTGCAATGAGAGCAATGAGGAAGTTCAT  
ATCATCGATGAAGGTGTTGTAGTCAGGGCAGGGCAGGCTTTGGGCTGATGTTTGTGAGCAGCTGCAGCGTCTGTGTA  
CACATAGATGACCCATCTTCTCATAACGACGACGAGTCCAGATTTCTTTGGCAGGTCCTTGGTGTCAAAGGGGTCTTC  
TCCATTTCTTTGGAGGAATTGTGAAGACTGGCTGCAGCTGATCCTCAGCTTTATAGCTCTCTCCCTCGATCTCACGCAG  
GTACTGGGAGGCCGTGTGTGGGAAGCGCTGATAGG

>Sequ28138EST2

CGGTACGTAGTTCGTCGGTTTTTTTTTTTTTTTTTACGTTAGTTATATGCTTTTTATTATAAATTTTAGCAGCCACTT  
CTTCAGACGAAGCTGAAGTATAACAGCTTGAACATGTAAAACAAACATTAATTACACAAGTGACTCATTATTTTCCTGG  
ACCCTTTCCCTCAAACACTCATCTTGGTTGCTCCTGGTGTCTCGTAGCTGTGTGAGGGATGTGAGCACCTCCTCTATCGG  
CCTCCTGCCAGCTGTTACCCCGTCTGCTCCTCACATTCAGTGTCCACTTTCACCTCTCCTTATCCCCCACCACAAA  
TATGTAGTTGTACTGCGCCAGTTGAGCAGAGCGAATCTTCTTATTTAAGGTAGCTCCCTGATCGTCTGCTCAAATCAGC  
CATGAAGAAAGCTTCACGGAACCTGCTGGACCACCTGCTTGGCGTATGACTCACTGTTGCCCCCCACAGGAATAACCAT  
GACCTGCGCTGGAGACAACCACAGTGGCCATTTCCCTCCAAAGTTTTCGGCCTGTATAGCGATCATTCTCTCCAGTGA  
TCCCAGCACTGCTCTGTGGATCATCACTGGCCTGTGCAACTGTCCTGCTCGCCCGACATACTGAAGATCAAATCTGAT  
TGGCAGCTGAAAGTCCAACCTGGATTGTGGCACACTGGTGTGTCTGCCAATAGCATCTTTGATCTGGATGTCAATCTT  
TGGTCCATAGAAGGCCCGTCTCCTGGGTTCAACTCCCAACGTTACCAAAGTGTGCAGACTCCTCTCCAACCTGCTG  
CTCAGCATTATCCCACTGTTTACAGGCTCCCCTAGACCATGGTGTAGGACGTGTAGACAGTTGGCAGTGAAGGAAAACC  
CAAACACTTGATACACACTCCTCACAAAGTCCAACAAGCCACAATCTCTTCTTCCAGCTGCT

>Sequ28144EST2

AGTACTTTCAGTTTCACTTTATTGGGTTGTGTTTACTGTACACCAAATGTAGCCGGGGTACTTTTTATCTTCTGTATT  
TTATTGAACTGTCATGATTTTTCTTGTGACTAATAAACACCTCAACCTCCCAATGTCGACTATCACAAAGACAGTATCT  
TTTTCTTCACTTTCTGTACCCTTGCCAAGAATTGCATGTCACCATAGCGATGTCCGTAACAGATCAATTTATTGTTA  
ACAATCACTGTTTTGGTATAGCGTACTTCAGCAAATGGAGTAAAGAAAACACAGATTAATAAAGCTAGCTAACAAATC  
GCAATAAAAAGAAAATAAATAGAAAATAATCCGATTAAGGTCTAGTAATCCATGTTCAATGAATACATAACATCTAC  
AGTATAAGTTAATAAATTTGAAGCTACTGTATAAATAACACTACCAGCATGCACAATATTGTATTATGGAGAATATTGGA  
GCAGTTATCATCTTACACTGAAGAAACAGTATAATAGGCAAGTGCATTTCTTGACCAAGAAGAAACTGAAGACAAAGT  
AAATCCACAAACCTCAAATCTGCTTTTAGAGCTTCCACTTGACATTGCATGTGCTCTATCCACAAATTTGACTTAGTT  
GACTAATCAAGTCTGTGGCTCCGGATGCCGTTTTCTCAGATCCCCTGCTCGTTATGAAGATAGCATAAATTGGACAAT  
AAGGGTGGACTCACTTATTGTTTTCATCATTTTTTTCATCGGTTAAAATTTCCATTCATTTTAATTTTGTCTATCTGGATTTT  
TGTGAATCAAATTTGTTCCCTATAAAGCGTAAGGACCCAATAGAAGTTGTTATGGACAACAACAATACTGACAATAAAG  
TTAGGTGTCCAAAAACAGTTAATTTATTCAATAAAGCACATCAGCACATGAGAGGGACAAGCTGACTCAACTTTACTT  
TATGAATCTGTATTTTGTAGTTACAGTATGACTGTGTGACTGAGCTGGACACATACCTGACACAAAGCAAAAAAATTT  
TTTTTTATGTCATCTTCAATAACAGAGACAACCTGCTTCTCACTCAAGAGATCGTAGTGTGGTGAACCTTAAGATGTC  
GGGTACGTTTGAAGTTACGCGATGAAGTTCGACACCCCTAAAAGCCCGTCTTCACTCCCGTCTGTAACCCGCTGCT  
CTCTCACTCATTCTCTCTCTCTGTCTGTCTGTCTGTCTTCTCTCTCACTAAGCAAGGCCATGACATTCAG  
GTTACTTTAATTTCTTGTGTCTCAAGCATCGAACTCAATTTCTGAATGCTCCTCCCTCACCAATAACAATAAGAC  
AGCTCAGCTTCAATTTGCGCGATAAAGACCAGTCTGCCAGTGTGAAGTATCGTTACCCAATAGTGCACACTGTGATGA  
ATGACATACCTCTTGCTTCTAAAGTGGTATTTTGGCAAATGCTGCAGAGGCTATCAAGGAGGGGGTTTCATTGTTTTTA  
TTATTTTTTTTTAATGTAGGTTATTTCTCAAACAAAATCGTCTTCTCCTCCTACATTTTTTTTCACTTTTAATTGTG  
GAAAATAAGAACAGCAGCCGCGTTAGTACCATCAGCTAAATTTGGCCGCGATGTTCCACTGCCCCCTCCACCCCTCCC  
TTTTTTTTAAATTTCTAAGAATTTTTTTAACTATTATTTATTTTGTGTCATTTTGTGAGCGCGCGTGTGTGTTGT  
TTTGGCAGATGAGGTTTGGACTCTTTAATTTGTTGCCCTCTCCTCCCTCGTCTGCTGCTGCTGCTGCTGCTGCTGCTG  
GTCAGTTGCTCTCGTAGCAGCTGCATGATGAGAGTGGAGTCTTTGAGGAGTCTCCTGTTGAGGGGTCTCAGCTCGCGC  
ATGGCGTCTCGAAGGCGGCTTTGGCCAGGTGGCACGGCCTGCTCGGGGGCGTCTGGGATCTCGTAGTAGAAGACGG  
AGTAGTTGAGAGCCAAGCCCA

>Sequ28145SNP2

AATGGTTTTAATGATGTTTACAACAAAAGAGAAGTGTACAGTTACAGTAAAAGATTATCTTTATATGTGTATAAAAAACA  
AAACAAAAAATACAGCAGACAAATGCATCAAAATCTACTATGTATCCTGATTCACATACTAAAAC TCCACACAA  
TCTTTCAGTTCATGCCGCCACAAGTGGAGGTCTTTTTTTTTTTTTTCTTTCTTTTTTTTTTGTCTTGTAGTCAGATCG  
GAGCAGTGTCCCTCAGTGTGTAGTCCATAATGGAACCAAAACCTCCTTACATTAGAGTCCCTGGAAAGTCAACTCTTG  
TCAGACTGCAGATAAAGAAAAAGGGAAATAAAACGGGGACACATTCCTTTAGATGAGCCCAAGCTTCCAAGGTGAGT  
AGTAAATGTTTTACAGAATGCATTTCTTGAGATACACAGACTTAATATGTACATGGTTGGCGTTTTTTTTTCTTTTTT  
TTATTTTTCTCTCTTGTGAAAGCCATGGTCACTTGGGCTGTGAACCTGATAAATCACACACAAACACCCAAAAACA  
TACAAAAATACTATATCTTTAACTACCAAGAGTAAGACAGTTTTTGCAATTAGTCCATGCTGTGACAGAAAAAGGAG  
ATTACAACAAACAAATGAGAAACAGACGCTTTTTCAGCAAGTTTATCTCAGAAATATACCAAAATATACATCTAAGCT  
TTGGAATTACTGAGGCTAGGACTAAAGCCAGTGTGGGTTTGTCTCTTAATACACATGCTGCAGGGTGAAGGGGAGAG  
AAAACAGAGAGAGACAGGACAGAGAGATATCTTTGGTATCTGCATTTGTCAAAGTTAAATATTTGGATTTTTTGC  
TTTGGGATAGCGCTGTGAGGTCCTACAACCTCACCTAGAGTAAAGCATTAACAAAAGTGTCACTGAAGCCCGTGGCC  
AGAGGCTGAGCCGAGGGACACAGTCCATGCAGAGTGAAGGACCATGATGCATAGTGTACAGCTGATCAGAGTCTG  
TAGTGAAGAGACAAATGTCAAAGGAGAGAGCTGAAGAGGGAGGTTAGGAGGGAGGAGGGGGGGGACAC

>Sequ28147EST2, Sequ28147SNP2

TAGGTTCCGTTTTTTTTTTTTTTTTTTAGTTTTGGAATCTTCTTTAATTCGATTGTGAAAACATTCACATCGACACATCAGG  
ATAACTTCAATACCAGTGGTAATACAGGATTGTAGATTGGCGCTTCCAGTAAATGCGTCAGCAGCAGTTCATTTTTTCCG  
AAAACACACTCCAGATCAAATTAGACCAGTCTTGAATGAAACTAGGCCAAACTTGCACACTAATCTCAGATTTCTGC  
TGCATGCTACAAACCATACCATCAAGTCTTGTGTGTGATTGAACTTTTTTTTCTTCATCTTCTTTGGCTGGAACAT

ACATGAAAGTAGCTTTTTTGGATCTGGATTAAATCTTCTGAAAGTAGCCTGCTCTCAGTTTCATATCCAACAGCAACA  
AAACACCGAAACCCATGCAGGATTTAATGGCTGGAATGTGAAAGAGATGAAGTACAGCCACAGATGGGGAGGGGGTG  
AATAAGATGGAGAGAGATGAATTTGGAAATTTACTTGTGAGACCCAACATGGGGCACACACACCTTTAATGCAAA  
CAGCAGTACTACAGGAAAAACACTGAAGTTTGAGAATGTTTTCCGTAATGATTAGAATACAGTACACACAAAACTCCC  
ACTCCACCAGCAACATACTAAAGGCAATCTTAATTATTAACCATGAATTACATCCAGAGGAATTTCAACCACTTATC  
ACAATTAACCCACAGTGCATTAATCTATCTATATAGATATTTATATGTCTGTATATATATATGTATAATATATCTCG  
GGGAATTAAGACTTTTGTCTGCATTAACAGTTCAATGAACAATTTCTTATAAATAAAATCAGTGGAAAAAATCTGA  
AGTCCATACACATTTCTCTTTACAAATAGATCCTCAAGATTAATGCAGAAATTTGTGTCAACTCCCAGGTGCATATGGG  
AGGAGAAAAAGCTGTGTGGCCCTTTGGTCAGCTCTCTAAGACCAGAGGCCAAGCTGCCTCAGCTGGCCTCAAGGCCTG  
AAATAAGTGGAGGGAAAAAAGGAATCTTCATCATACAGTTGTTTTGAAACACACACACGCACACACAAGACAGACAAA  
TCACTACATTTGCGCATTTACAAGTTGACTATCAAAATTTGGGACGACTGTACACATTTGTTGAGATAAGACCATATTTATG  
GAGCCGTTTTAATTCATTTTTTCTCGCCTTCACTTCTTTTTCATCTTGTGTGGCAGAAATTTTTACAATTTTTTCCCCTG  
TATACACTTTTTTCTCCAGCAGCAACATAAAGGACAGATCTTGTAGTGGAGATGTTTGGATGTTTATTTCTGTTGGAGAGA  
ATGAGGGCAACGATGAGCCCGTAGAGACCCAAGACCTCAGCAAAAATCAAGATGAGGATCATGCCACAAAAAGCCTT  
GGCTGTTGAGCTGTGCCTCTCACGCCTGCGTCCGCCACGATGCCAATTGCGAAGCCTGCTGCCAGCCCACTGAGGCC  
ACACTAAGCCCAAGTCCAGATGAAGGAAGCTCTTGTAGAGAGGTGACCTTCTCTGAGATGTTGTTGGCAATCAGCACT  
GCTACTACCAGACCGTAGATGGCTATGATACCCGCCATGACCACGGGGATGATAGACTTCATGATGAGCTCCGGCCTC  
ATCACAGACATGGCGCAATCCCTGTACCGCTCTTAGCTGTGCCATAGGCTGCTCCCAAGGCCTGAACACCATAGCC  
GCAGAGGCACCCATCACTGCGAAGAACGGAGAGTATTCGGGGCTTTTCGGCCGACATTTCTCTCACACAGTATAAAAA  
TAACTAAATATACAAAAATTAATCAGCAATGACGGATCAAAAATCGCACTTGGCGAAACCTATCGAAGGCCACAGTCT  
TGAATGCGAACTGAGTACACCAGGAACAGTCTGACCACCTAAGTAGCAATGTAAACGGGATAGTCACGACTCTTCT  
GATAAATACCCGGCGCAGCAGCC

>Sequ28148EST2

AATGTGAAGTCTTTAATTTATCCATCAGAATAATAAGGGAAAGTCTAATGCCACTTCATTCAGTCTACTCACAGCAG  
CTGACACAGACACATTTGAGATCAAACTTCCAGAGCTTTATTGATGCCATGTGAGCTGAACAAGAGCAGGTCTCGTCA  
GTA AAAACCCCTTTAACTGGAAGAGAAACAGCACAAAATCAAGTCACTCTGACTGGTGTAGAGACAGACAAGCCTAT  
GCGTTTTCCCATAAATCCAATCACATCCAGTACCCAGTCCAGGAGGTGACCTTCTCTGAGATGTTGTTGGCAATCGGCCTT  
AAAGCAAGACGCAAGTGAAGGCCACTGCTTGTAAACAGCTTTTGTGTTTTAGAGTTATTTATTTCAAAATTTGGTGT  
ACTTAAAAATAGAACTATATTGGTGTGTAATTTGTAATTTAACGTTTCTTGTGTCCATGTCTGGATAAGAAGACAG  
TATTTTGGAGTACCATCCTCAGGCAAAATCCTGCTAATGAACAAACCTGAATGTTGCCAATGAACATTTAACGCCAGT  
TAATGTTTGAATGTGAAAGTTAACATCTGTTGGACTGAGCGACTGGCCAGGTCTGTCCACATTTTCTCTTCTGATGT  
TTTTCCCTCCATCCTTATTCGGAGGACTGACTCTAATCCTCTGCTTTGGCCTCCATCTCCTCGGCGTCACTCGTCTCCA  
TCCACCTCAGCGTCTCTCGCTCTAACCTCTCCAGTCCCGGGCGAGCTCTGTCTCATCCGTTGTCTGTCCACCTTTG  
GGCTCCATCTGGATGTTAAAGACGCCTCTCTTCTTCAATCTTCTCCTTGATAGCAGCCATGGCCTGATTGAGGACA  
GACAGACCCCTCTGTGCGCTCCAGAGTGGTTGTTGTCTCACGTAGCGAGGGGAGCGATCAGGTTGATCTTGATGGGC  
ATGGCCTCTGTGGAACAGCCCAGCCAGCCCTCAGAGCTTCCCTTCACTGCATCAATGCCCTCATAACCCGTAGCATGCC  
ACTTCAATGCTGCTCTGATTTTGGACAGCCTGTGGAGTGTGAGTGCCTGTTGATGTTATCAATCAGCACACTCCTCTCT  
TCTCTGTATTAGTCCAGACATCCAGAATGGCGGGATCTGATACAGCCTGTTTGAAGACATCATAAGCTCCGTTACT  
GGCCGCTTATATTTTTCATCAAAGACCCAGGCAGTGCCTGGTGAAGCTTCTAGCTGCTCATCCTTACTGTAATCC  
AGCACTTCTGCCACGTGTGCGCAGGATGCTGTACACAGTTTTGGATTTGGTGAACCTATCTTACACTTTGATGGCCTCC  
TCTGGGGAAACTCTTCTTTTTGATAAATCAATGTATCCCTTTTCTTTGTCTACTCGGATGACGACCACGCACTCATTG  
CGGCCTATGCGGATGAGCTTGTGATGGAGCGGATACGTCGACGCGACAGCTCGCTCAGAAGGATCATGCCCTCGATG  
TTGCTGTACTCCAAGAGGCTGACATAGGCGCCATCTCAGCAATGGACCTCACGTTACCATCACAACATCCTCCACC  
TCTGGAAACCGGTGCTGGTAAATCGACAGCTGAGCCCGGCATTTGCTGTGTCATATGGTTACAGAACGATACACTGG  
AATGTTGTAAGTCTGCGGTTTAAATGTCCGATTGTTTTCTTTCCGGGTTTTTTAAATGAAGAACTCGGGCCCGC  
TAGCTCACATTCATGGGTGTGCTAATTTTTTCGACC

>Sequ28162EST2

GGGTAGGTCGGTTTTTTTTTTTTTTAGTTAAGTAGTATTTTATTTTACATCTGTGCTTTGAAAGGGTCAACCAAC  
AAACTGAACAGCACATGACATTTACACATTTTCAATTTAGTTTCACTTCAACAAACCATTTAACACTGGAATGTTATCA  
AAAGGCAAGTTTTTAACTACAAGTGTAAACTACAACCTTCTCAACAAGTTGTAGCTGTAAACTCTAAGACCAAGACA  
GACAAGCTATATTAGACACTCTTCAATGTGTTAAGTGTTCAGATACTGAATGTTATCCCAGCACTGTGCATGTTTAA  
ATGGTGAGCTGTGCGCCCTCCTTAACCAAAGGCTTCAAGGCACCGAGGCTCTCGCAGGAGGGAGGACACCCCCACACAA  
TACCACAGATCCCCAGTGCCTGTGAGGGAGCACTGAAAGACTCAATCTCCACTCCCTCTCCGACCAGCAGTCCAGCC  
ACTGAGGACAGGAGCTGAGGACTCGCAGAGGCTTTGAGGAACAGCAGATTTCCAGTGTGAGAGAGACGGGTTGTCTGAAC  
ACGCTGTCAATTCAGTCCAGCAGGACTGGCACACCTTCTGAACGAACCACGTCCTTTGTAGCTGCAACCACTGGCC  
ACGATCTCCACCCCTACACACACACATCAGTTGTCCCGTCAGATGCACAGTGGCCCTGGTTTACCATGATTTCCAGACTCC  
TTGGCGAGGCTCAGTGCCTTGTGAGGTTCCGGGAGCAGCCTGATTCATCATTCATCAGTCCAACCAGGACTGCTGAA  
GTCATGTAACCAGTGGAGGACTTCATGCAGTCACTTGTAGTGGTTATTTTAACTTGGCTGAATGGTTTCTTAGAAGTA  
GTGCATGACTGCAACACAGCTCCAACGGCTTCTCCGAGTTTAAATCAGTGTGAGATTCTGGGAGAAGGTGCTGGCC  
AGAACCTGTGCATTCCTGCTCCAACAAATTTTGGCCTTCCACATGTCCACAATCTGCAGGCGGATGCTCTCCCCA  
CAGCGCGGCTGAGCTCCTTGGTACTGGCTCCAGGTGAGGACAGTGTGATGACATTTGGATGGTCCACCAGTGGAGCA  
TTCTTAGGTGGCTCCTCAACAAAGACGTCAGTCCGCTGCTCCTCCACACTGTCCGGACTCCAAGCTCTGACCAGGGCA  
GCCTCATCAATGATGCCCCCTCGTGACAGTTTACAACCTTCACTCCTTTCTTGCATTTAGCAAATGTTTCGTCGTTA  
AGCAGCCCCACAGTAGAGGGCATTAGGGGAGTGTGGACAGTAATATAGTCACACTGGGGCCAAAAGCTGCTCCAGAAG  
CATCTGCTCCACCCAGCTGGCTGACACCTCAGGTGGAGTATTGGATCATAGCCAATAGTCTTCATGCCAAATGAT  
TGCATTTCTGAGGCGACTTCTTTTCTTCTTCCAAGTCCAACGATTTCCAAGCACTTTGCCAAACAGCTCTGCACCC  
ATGAACTTTTTGCATCCAGTTCCTTGTTTTTCATCGACATTTGAGCTTGGGACATTTCTTGGAGGCTCATCAGC  
AGGCACATGTCAGCTCTGACAGACTGATCGTGTACCAGCTTGGTGTGTTTATGACAATAATACCCTTTCTGGTAGCA



GCATCAACATCCACATTGTCCACACCGGTGCCAGCTCTCCCAATGAGTCTGAGATTATTAGCAGCATTTACAACATCA  
GCTGTTACCTTGGTTGCAGATCTAACACCACAGGCCGTCAATAGTCCCTTTATTTCCGCGAGTAATTCATCCTTTTTTCATG  
TTCTGCTTCTCCGTAACCGGATGCCATTTTCTCCAGAACTCGCTCGCAGCGAGGGTCCACACTTTCACTGATCAGG  
ACAGTTTTGATGGAGATCGGGGCCATCTTGGAGTTTGTCTCCGGCTTTGCTATTTTGGTGGGTAACCTTGTGTTCCGAA  
TCGGTTGATGCCTTGGTGAGGTGATGGACACGGGGAGTAGCTTTTCCCTCTGTTGGTTTTG

>Sequ28178EST2, Sequ28178SNP2

TGACAAGTCTTTATTTTTTTTTCATTTAATGTTGAACCACATTGAAACAGCAACACCAAAGTAACACGTTGGCTCAGTG  
TGTTAGTAGATGCTTCATGCGATACGTACGAATGTTCTCTATAAACTGGGTCATATACAACAGTCGGCTGGATAACAAT  
ATTTAATGATGATTTTAGACATTTTACCACATAGCCAGGTTTCAGGTGACAGATGGTAGTAGTGTGTTGTGCTGTCAG  
ACTACAAACGAATCAACAGACTAACAGACTCGCTGGCAGATCAGATCATTATATCACTGTGACATCTCTACTGGGG  
CTTTCAGATGCTGAGGTAAGACGAAACAGTGTTCAGAAGCTACTGAAACGTCCTGCAGTGTGAAAACAAACAAATG  
TAACACTCATCTCCCTAGCGTCTTTACATGGCTGCGGGGTTGTTGATCTTGCCCATGAAGAGGATGCTCTTAGTGGAA  
TGCTCCAGGATGAAGACCAGGAAGGGCCTGTTGAGAGTCAATGGTGTGCGGGCATACTCATGGGCATGACTTCAAGGGTG  
GTGCTGCTGCTGCTCTGTTCTGTTTCATCCAGCTCAGCAGCGCTGGTGGGACACCTTTGAGACTTTGAGCTTTGAGCTTG  
ACCTCATCAGACATTCAGAGAAATCAGCGTTGCTGAAAAAGCGTTTGTATTCCTAATCTTTAAGCGTGTCTGCTC  
AGGGAGGCGTCAGCGGAGATCGAAAACCTTTGGCAGGAACAGATCCACAGAATTCCTGAAGAGCTTGTGATGCCAGTTT  
TGAATGTAGTCTTGTGATGTAGCCCTCCACCTCTGCCATCTTGCCCTCATCAGGCAGGACGATCATCATGGAGGTG  
TTGCCCTTGTAGGGCAGCATGATGACGGTTGTGTGGTTGTGACGCTCCTGATAGAAGTCGTAGCGTCCCATCCTCCTC  
ATCATGTCCACCTGGACTTTGGTGGTTTTCGTCCACCTGGAAGTCTGCCTTGTGTGTCTGGTTACTATCGAAGGGTTTC  
TCCCACCTCTCTGAAGTAGACAAAAGTTGATCAGCACCATGAGCCATTTTCAGGGTCCAAGTCTTACCACATATCTTTA  
ATCTTGTCTGTGTTTTGCGGCAATGAATCTGTTGATCTCAGCTGCAGCTCAACGGGTTTGGTAAAGTCGACGCTT  
AAGCTCTCACCGGAGTAGAAAAGCTTGGACATCTTTCAGGAACCTTCCAGAGGAGTGAAGCCGGAGCGCACTGCCACA  
GCGTTGCCGACATCCAGCTGCTGGTCTCTGGCTGTGGCCAAGCATGTGAAAAAGATGCTGATATGCTTCGTTGATC  
TGTGCCCTGGTCATGACCGCTGTAGCCCAAGGAGGAGAAGAGCTGGCTTTGGGTTTACCACGGGCCCCCTGTGGACAGC  
ATGGACAGGGCTGTGGAGATGCCAGCGGTGAGTAGAAGATGTTCTTCCAGCTGCAGCCTTGGCATTTCAGACTTTTG  
TAGAGTGCAAAGCCAAAGTCGGCATTGGGAGCGGACAGCTTGTGGCAGCTCATCTCCTCCTCACTGCTGTGGCTATGG  
TGGTGTGGTGGTTCATGGTGGTTCATGGTGGTCTGCCAGGTT

>Sequ28205SNP2

CCTGAAGGATTATTTATTTTTAAACCTTTTAAATAGAAGTTGTTATGAGCATAAATGAAAGCTGGAATGTGGTGTCTTT  
TTGGCTTCCAGATAACTGGACCAAAGAATAAATGTCAAACGACACTAAGGCACTGTTTTGAAAAGAAAACGTAGCCAC  
TTTATTTCAAGCAAACCTACTCTGTCTACATATAAGAAGGTTGAGCGGTTGTGTTTAGCCAAATCCATTTGTTGGCTC  
ATCTTAAGGAAATGAGAATACCAAGTTACATATGACAGGAAAGTCAAAAATCATTGTCATTGTCATCCTGTCTC  
CTATTTCAAATAGCAATCTGTTAAAATGTCTAAAATCACAAAAATTCAAAAAGGACACTGACATATCAAACATAACAAA  
GTGTCAACATCACACAACATCTGTACATCACAACTGAGCTTGAATCCTTCTCCATTACGGTACTGTTGTAACGCT  
AATAACCGCAGTGAATTTATCTAAACAGCCAAAAATGAATTCCTAAAAAGGAGGACCCACGTGAAAACCTATTAA  
CGTCACCTGACTATCATTTGCACATAATAAACTCATTAACCTCTGCTTTTCAAGTGCATTTAACATCACAGATAAAAACAG  
ATGACAAAACAAGTTAAAAACAATAACACAGTCCGCTCTCGGTTCTCGGTGTCCTTTTTCGTTCAATTTCTCTAAAAA  
CTCAGCGGCTGCTCCAGCACCCTCCCATCTGCAGTAAGGCTGCACAGTCCGGCCTTCAGCGCTGAGTAGCCGGGC  
TGCTCACTGTACTGCAGAGCCATCACTGCAGTCAAGTGTGTTTGAATGCACTGGAAAACCTTTCATCTTCCAAAGCAG  
TGAGTCAACAGTGCAGGAACATCCTCCATGTACCTCTGTTTCTGTGTGGCTACCTGGTCCGGTTGAGTGGAGACGGTC  
CACGGCAGCGTCCCTGTGTGCCATCGCAGCATGCAGTAACCCAGAGACTGCAAGTCACTGCGTCCGGATGGAGCTGCT  
CCCTTATGTGCATCCAGGCTGGATGAACTCTATGGTCCGCTCGTGTGGTGTCTGCTGGCTTACCGTACTCAACAT  
GTTGGCCCTCTGGACGTAACCTGAAAGCATGGCAGTACTTACAGGTTAGACCTGTGAAGTCTGCTGCTGTTGATGT  
AGATGTTTTCTGCAGTAATATCAGCATGAACATATTCTGTTGAATGGATATACTCCAGAACATCCAATGATCCAGG  
CAAGCTGAAGAACAGCTTTCTCAGTCAGAAAATCATCCTCATCCTCAATGATGGACTGGAGAGACTGGCCCA

>Sequ28217EST2

AAAAGTGTGAGTCAAGGCTATCTGTTGAGTGTGAGCATGGTAACCATGGTTCACACTCAGCAGCCACAGACACACAC  
AGGCTCCAGGACACCTGACAGAGCTGTGAAGCCAGCTGGAACCAGGCTCAGGATCTGGACCCACCAGGCCCTCTCTC  
TGTTCCAGGTCAGCATAAATAGTTTTTTCATGCTCAGGATGTGGTCTGATATAAGCCGAATGAGGAAGGTAGCTGGT  
GCAGTACAGATGCTGCAATCTAGCTGTTACACATGATGAAGGCCAACAAACAAAGAGGTG CAGGCTGCAGCAGCCCC  
CCCCCCTTCAAGTCTGACTGAATGCTGTGCTCTAAATGCGTCTTACATCCTGGATGTAAGCAGGTTGTTAGTACAAC  
ATTAAGTTTACTACAGCAGCCAGGACAATACTCTAAACTGCGCTGTTAACACAATGTTCTCCACAATGCACTGCGC  
ACAGGAAACGGGAGGAGCTGCTCACATCTGGTAAACATCCAGATGAACGTGTGTTGGATTTAATGTTGAAGCTGTGTGAA  
CAGACAGGAGGTTTTGTGCTGCACAGACTGGTTAAATGAAGCTGGTGGCTTTGAGCTCTGCAGCTCCCGCTCAGTCCC  
AGTCTCAGACCCCTGATGGGCTGCAGAAACAATAAAACATTCAGATGTAAGTTAGGATCAATGATGAAGACCTGGTCT  
TTATGTTCTGGGCTGACTGCTGTTTTTCTATTAGTTTGGGTTAGAGCCAGTTAACACAGTCTTGTCTTTCAGCAATA  
CTGTGCTGATTAATGTTAGTAAACACACTACTGGGGTCCAGACCAGGCTGTGTGTAATACTTACATCGGGACTAAC  
TTCCTGGTCTGTACTCTGGATCCTGGAGCACCACATTCACACCGACACAGACCCCTCTGTATCATCACTTTAATACATG  
GCTATTTTTGGTCTGAACAGGGCTGAAGGTGTCTGGCGACAGCTTCTGTCACTTACATACAGTTTGTATTAACACGAG  
GAGGAGGAGGCTGGTGGCTGGGCCCCGATAGGACACACTAAGGCCAAAGTGAATGGACAGTAACACACACACACAC  
AGACATGTGAGTGGGGCCGTGAGCTCATATCTGGATGGATCTCACACATGCAGAAAGGACAGAAAGAAACCCAGGAAG  
ATGTTGGACACAAACACCAGGCACATGTCAAACATACATTTTGTGAGTACTACTGCACAATGAAATCACACGGCA  
ACACACTTTGACCCAAAGATGTGAAAACCTTTTAAATACTGTTACTGTTGATACAAGAATGAAAGGAAACAAAAA  
ACGACAGTCTTTAAAATGTTGCTGCAGGGGAGCGTCAAACATAGAACAGACTCCAGTCAACAGCTCACCTGTCTCT  
ACTACAGACACACTAACAGGAGGAGACACTAACGCATCCTGTACTCTGCAGCTCTCGACATCTCACACAGCTGACCC  
TTGAAGTCGATGTCTACGGTGAAGTCCAGGTCCTATTGTTCTTACGCTTTGGCTTCATGCTGATGGTGGCCGAAGATC  
TCCTCTCCAGTCTTCACAGTCAGGTAATCATCCAGGTAGAACACAGTCTGCTTCCAGTGGGTGATGGGAGACTCTGGG

CTGGTGGAGAAGCCGGTCTCTTGTGACAGCGGGTGAACCTCAATGTTGAAGTAGGTGACCAGAGCGTGGATGTAGTCG  
TTCTCTTACCTGCAGGCAGAACCGGGGAGGTGAAGGTGAGGTCTCCGCCTTCACTGTGTAGATATCCACCTCCTTG  
ATGAGACAGGCGCTGCTGACCAGCTGCTTCGGGTCCACCACATCAACCAGGGGCTCCTTGATTGCCACCTCCTTGATG  
CATGACATGTCAAACCCATACACGTTCTCCACCAGTGGATTTTGTAGTCTTGTACTGCCTGTCTCGATGGCAGTG  
ACATAGAGCGTGCCTGTCTGGGAAGATGAGTCCATCTGGTTTCAGCCATTTATCCCTGGCGTAAATGACTGTGTTG  
AGCATGGACTCATAGAAGAGGCAGTAACCCATCCACTCTGATATGATGATGTCTACTCCTTCCACAGGCAGCTCCACC  
TCTCCACCTTCCCCTTGATAATGGTCACCACGTCATCCAGCTTGTGGCCTTGACTATCTTCCACAGCGTAGTCTGAG  
ATGCTGCTGCACTCGATCCCTATAACCTTCTTGGCCCCGGCTTGGCTGCAAACATGCAGAGGATACCCGTCCCCTG  
CCCACGTCAGCACCACCTTGTCTTGAACAGGTGCTTGTGTGGAACATGGAGTTGCGGTATGTGAGAGTGCGAACC  
TCGTCTTTTCAGCATCTCCTCGTGGATGCCGAAGTGGGCGTATGAGTCAAAGTAGTAGCTTTGACGTCATATCCTCA  
GCTGCAGGCTTGGCTGAGCTCTCCCCCTGAGAAACCTCCATCCTCTCTGCTGGCGCCGCAATTCGATCTTCTGCCTG  
GCTGCC

>Sequ28224EST2

CCTACGCTCAGTTATGGAAGTGGCGTGGACAAAATAATAGACACATCTGGTGGTATAATAACCCCCACAACCCTCTTT  
AGTACTTATTAGCAATATATAAACATATGTGCTTGATGGACTGGCTATTTAAATCACAGACGATAAGTCTGATGACCT  
TGGTGTATCCCCGACTTTTCATCTAATGCCACCAAAACATTTTGATTGAAATATCACATCATAATACCAACTGCTGGC  
TGGATTAACATCAGATTTTCTCTCAGACATTCGTGGTGTGCAGAGGAATATTTAAAAAAAACCTTCAATACCTTGA  
CTTTTCATCTATTGCCATAAACTAAGATAATAAGCGTTATACTGAACCGTCTAAACATTAACACAGTAGCATGATCAC  
TGTAAGCGCGTTAGCATGCTGTGCTTCCGTACGTCCTCACAGAGAAGAGAGACACTCAGTCTTATCAGCTGGTACCTT  
GGTGTATTTCCTACTGTGCTTCTCATCTCAGTATGTTCCACAATATGTTCTTAGGAAATGTAGTCCATCGTTA  
TTTATGTCGGTCTGTCTTCCAGATGTCACCTCAGGAATTAAAAACA TGACTGTTTCTATCTTTCAATGCTATCCTCTTCC  
TTCCGTTCTTTCTTTCTTTCTTTCTTTCTTTGAGACTCTTCTCTCAACATGTTGAATGATAAAATGTATCTTGTACTGT  
AACGATATGGTGCAGGATTTTAACTACTTTTCTAACCTATAAATGGCTTTAACTGCTTCATGAGACATTTTAAATAT  
TTATAGAAAAAGAGTTTGAATCAAATCAAGTATTAACACAAACCTAAACAGGGTTTAAATCAAAA TACTCATGAGT  
GCACAACACTTTTAAACCAATTTAATTTTATTAAGAAAAAAGAAAGACACTAGGTTGATTCTGATTGGCTGGAAAC  
CGAAGTGATATCACAGCTCATCTTTAGATGTTGTGTTGGTGCAGACTCGTCACTGTTTCTTGTGTCATCACCAGTGT  
CGTCACCGTCTTAGCATCATCATCTTCTTCTTCTTCTTCTTCTTCTTCTTCTTCTTCTTCTTCTTCTTCTTCTTCTTCT  
TTTCTTCTTCTTCTTCTTCTTCTTCTTCTTCTTCTTCTTCTTCTTCTTCTTCTTCTTCTTCTTCTTCTTCTTCTTCTTCT  
AACGATATGGTGCAGGATTTTAACTACTTTTCTAACCTATAAATGGCTTTAACTGCTTCATGAGACATTTTAAATAT  
TTATAGAAAAAGAGTTTGAATCAAATCAAGTATTAACACAAACCTAAACAGGGTTTAAATCAAAA TACTCATGAGT  
GCACAACACTTTTAAACCAATTTAATTTTATTAAGAAAAAAGAAAGACACTAGGTTGATTCTGATTGGCTGGAAAC  
CGAAGTGATATCACAGCTCATCTTTAGATGTTGTGTTGGTGCAGACTCGTCACTGTTTCTTGTGTCATCACCAGTGT  
CGTCACCGTCTTAGCATCATCATCTTCTTCTTCTTCTTCTTCTTCTTCTTCTTCTTCTTCTTCTTCTTCTTCTTCTTCT  
TTTCTTCTTCTTCTTCTTCTTCTTCTTCTTCTTCTTCTTCTTCTTCTTCTTCTTCTTCTTCTTCTTCTTCTTCTTCTTCT  
CCACCTCTTTGCCAGCAGTTGGGAAATATTTGAGCGTGGGGAATCCACGAATATCGAGAGACTCCACTTCCGTTGGCTG  
TGGCATCCATCTTGGCTATGATAATGTCATCATGGTCTGAGTACTTTTACCAGCTGATCCAGATGGGAGCCAGTT  
CCTTACAATGTCCACACCATGGAGCATAAAAACCTCCACAAGACGTTTTTTGGTGGGTCCAGAGCCACAGACTCAAAGT  
TCTTCCCACCAGGACTTTGACTGGTCTTTGTTCCAGTCTTGGGATCTTCTTGTGCGTAAGTAGGGCTTGGCAG  
TGCCATCGACAACCTCCTGGCACATCTGTGCGAGAGAATCTGCTGTGAGATCCCCGGCGGATGTTGAACCTTTTTTC  
CTGTATCCATGTTTATGATGCGTGCAGTGGGGTCTCGTTCTCGGACACACCGAAAGTATGTCAGCACATGAGACACGG  
CTGTTGTCAGTCAATTACAATGAACAACATCTTGGCCTTGAACCTTTGGCAACAGGCCTGGATTTTTCCACCAGGG  
CTGCTGACTCTCCACTGTGGAGTTGATGAATAGCAGGCTGTGCAGGTGGATGCTAGAGGAGAAGATCTTTTCTGCAG  
TCTCCTGTTTGAATGGGATGATCAGTCCAGGCTGTTTTCTTGGATGAACGTGGTGCAGATTACTTTTTGTCCAGCTTC  
CTTCTTGTGACAATGTAAAGTCTGCTCTGCTGCTGCAAACTTTTTGAAGAGGACCAGTGGCTTTTACTTCTCAT  
ACTTCTGGAAAACCTCAGGAGTCTGTTGTCGTTGGCAAACCTGTGTGTCAGTCTGATATCGAAGGCAACTTCTTGAACACCT  
TAGCCGCTCACTCTCCAGACTATCGAAGAATCCGACAACAGTGTGCTATGGGCATCGATGAACGAGCTGCAGACT  
GTGCAGAGTGCAGGACTGCAGCTCCAGGGCTGTACGCCCTTCCAGCCACTGGATGATTCCCTCTGCTGACCTCTTAC  
CAGTGTAGTGCATGGCTGCTCGCGGTCTCCATTGATGAAGAGTTTCCAGAGAGGGGAAGCCTCCGATCTCAAACCTTT  
CAGCCAGCTCCCCTCTCCTCGGTGGCGTCCACTTTGGCCAAACGCATCGCAGACTCCTCCGCTTCCAGGTTCCAGCAG  
CCTTCTGCATCTGCTCCAGCTGTTTACAGTGACCACACAGGAGCATAGAATCCACAGCAGCTACTGATTCT  
CGTTGAGACTCTGGCAAAGTTGTTGATGTGCAGAACCATCACATCTCCCTCCTCTCTATCTCTGTTGTTTTTTCTT  
CTTTGGTGCCTCTTCGGTTTCTCCTCCTCCTCTACTGACTCTGCTGAAGTCTCCTCTGCTGTCTCCTTTTTGATGTCT  
CCTCTGACCTGTCTGGTTTTTCTGCTCTGCTGCTGCGCTGGGCGCAGGAGCCACAGCAGCAGGCCAGCAGGGTT  
ATGGACAAAAGCGTGCATGTCTCATGTTGAGCTAC

>Sequ28237EST2

ATTTTGTCTTTTTTTTATTATTAACAAGTCTGAAAAAATGACATGGGAGACAACAGTGCAAAATCTGTACATAAATTC  
AGTTGCAGGTATCTTATATACATGAGTACTGAACAGGAACGTGAATACACTCTTACTGTGATGCATGTAACAGAGTTC  
ACAACACAGCAAAAAGACATGGTGTAAAGATGTCCGATTTAGTTGTAGTCCGTGATGCTCAGGCTGCTCATTCTCCCAA  
GGAAAGGTGGGGTGTACACTGGAGCCCAGACAACTTAACAGAACAGATCAGGGGCACAACAGAAGAGGATCCATG  
ACTTCATTGATACACCTCCAAGACATTTAACATAATTAGTCAATGGGGAGTTATTACAGCAAGTTAGAACACACCAGA  
ATTTTGGGTAATGGCCACAAGTCCATATTGACAAAAACATCAAGGCAAGATTCAGCACAGTCCCCTGATGGACTGG  
AAAAGGGGATAGTATAGAAAAAATAAATCCCTCCTGGCGGGTAAAAAATAAATAAATCTATGAAAGGAAGTTG  
AAGGTAAGTGCATAAAAAGCTTAAAAATCAAAAAGGTTGGGGGGCCCAAAAATTAAGAGGTAATCCACTAAAACCTGC  
AGCACACACAGCTTTACAATGGAGAGAGCAGCTATCATGATTGTCAGGTCAACTGTCTCTCCAGCTTTGTTCTACGAT  
GGCGGACACACGCTTCTCGTACTCCCGCTTGTCTCCTGGTAGAGCTGGGCTGCCTGACTGTTGGCTGGACTGTTGGG  
GTTTGGTTTCAAGCAGAGACTGGATTGATGTAAGAATAGAGGAGACATCATAGGTGGGACTCCAACGATTTCTGTAG  
GATCCAGACATACTTCCATCTGCATAGACATTTGGATGAAACATCTTTGACACAAATCGTACTGTGGGGGTTT  
GTTGGGTTATCTTCTGTGAACCTTACAATTAGTTTTAATGTACCATCCTCAAAGGGTGTTCCTTCCAGCCAAATAT  
GACTGCATTTCCACACCATGATGTTGTTTTAGATGGGGCACCACCTAACACCAGCTGGAGGATCCTCTTGTAGCCGTTT  
AAAATCTCTCATAAGCTCCTTCTGGCGGGAGTTGACATGGTTAACTTGTGAAACACGTAATAACAACACCGATACG  
TTTACAGGG

>Sequ28258EST2

CACACACACACAGTGACACACACTCACTCTGTGGTCTGTGTGTGTTTCAGAGCGACCTGTCTCTCTCTGCC

TGTCGTGTTTACTACAGGTAACGATGTCATCAATCACATGATCTAACATGATGAGGTCTGACATCATCAACCACATG  
ACGTCGGACAGCTTTGAATCAGGTAGTTCAAGATGTCTATCAGCTCCTCTGACCTCTGATAAAAATCAATGATTAAAGT  
TGATCAGCTGTCAGTTGATTTGGTCACTGCTGTGAGCTGGATGTTAGTTCGGCTCCACACTCAGGATGAACGAAATAA  
ACTGTGTGTTATGGTTCAGTGTCCGACCTCTGACCTTTGACTCAGTATCACACATCCGGCTGAATCACAGGAGCTGT  
TACCTGCTTGTCACTGAACATCACATCTGACTCCTCATCAGTCAACCAACCTACGTTTCCATGGAGACAGAAAATGGC  
TGGTAGCTAGACGCCCTTAACTTTCATCCTCATTGTCTCACCTATCTCACACCTGTCCCTCTCTTCTCCTCTTATC  
TGCTTACAATCAGCTGGAACAGGAAGTGCCAGAGGACCTACACCTGTGTGAAGCCACCCCTCGTCTCCTCTGGTC  
AGCTGTGCGAGGACCTCCTCTTCACTCTCACCTGTTTTAACTAGTCTGACCTCTGAAACACACACACCTACCTGTCT  
CTCTCTTAACACACTCTCTCTCTCTCATCCAGCTGCAGCTCGTATCTCTACTCGTGTGCTCTCCTCTTTCATC  
TTCGTCTCTCCTCGTGTCTCCTCTCCTCCTCCTGAGCTGAAGAGCCGGGTTCTGGCATATGTGCCGCC  
GCCGCGGTACGCCACCATGTCCCGGTGCTATTTCTCTCGTAGCTTCTGGGCTTCTCTTCTGACGGCTGTTTTTCAGA  
CTGGGACAGTTTGTCCACATCTCTCCAGTTTCTTGGCACAGTCTCCTATAGACAGACCAGGATACTGCTGCTTCCAC  
ACTGGGACGGTACTCGTGCAGAACACGAAGAACGCAGACGGGGTCTTTTGGGTGCGTTGGGGTCTTTCCTCTTGGC  
GCCCTCTTTCCGAAGCCCTTTGGTGGGACGTAGTCTCTCATCTCCTGTTGTAACGCACCTTGTGGCCTTGGCCAT  
GTCCTCGAAACACTTCTTATCACTGGGAGACAGAGCTTCCATCTCTCAGAGCATTTCTTGGAGAACTCCGCGAAGTT  
GACCGACTGCTCAGGATTTTTCTTTCGGTGTCTCTCTGACACGTCTGGACGAAGAAGGCGTACGCCACCTCTTCCC  
TTCGGTTTTGTTGACGCTTTTACGCATCATAATGGCGGCTCGTACAGGAGGGCCGGCTACAGGCGGAGGCAGACTTCGAA  
CCGGTTTTCCGGATTTGGGTCTGGGGTCTTGTGTTGTTGTTGGAGGCTGAAGCAGCGACTGGAGGCC

>Sequ28315SNP2

AAAAGAAAAAACAACAAGACTGACGGGTTGATTGACAAAAATTACTAAAGTTAAATCATCGAGGGAATTTTACT  
GTCGATTGTGCCGCGAGGCTGAATAATGTGTGAAAAATGAGATGAAAGTTCTTTTTCACATTAGACAGAAAAGGCAC  
TTTTTGAATAAAAAATAAAGAGGTCTAAATAAAACAAAACACAGACTTGTGGAGGTAGGATGACATGGATGGAAGGGCA  
AGATGAGAAACAATACATAAATATTTTTGGAAGAAGAAAAGAAGCTGGAAGTGTGTTTCTGAACTCCTCAAACGCTCAT  
TACCATCCGGACGAGTTCTTCATAGTTAATGCAGCCATTGGCATCTTCATGCTCTGCTAAAAGAGTCTCCACCTCCTC  
CTCTGTCAATTTTTTACCTAGTGTAGTGAGGACATGACGTAGCTCTGCTCCCATCACCGTACCATTTCCCTCTTGTG  
AAAGACTCGCAGGCCCTTACAATGTCTCAAAGGAGCCCTGGTCTTGTCTTAGTAATGGCCTGAAGCATGGGCAG  
GAACGTGTTCAAAAATCCAGCAACTTGTGGTTCATCTCTTCTAATTTGGGGTTTCCAGGACTTTGAGCACCTCAGCATT  
GACAGGGTCTGTCCAACGGCCCGCATAACATCACACACTGGCTGTAGGTTATCTTCCCCTCACCCGTCCGGTCAAAA  
CAGAAGGAAGGCTTCTTGTACTCCATGATCTGGTCTCAGTGAAGTCAGACATGTCTGTTTTTGGATATAAGACACA  
GACAGGAGGAGAAGGCTTGTATCTTAAGCTGTTAAGAC

>Sequ28317EST2

TTTTAGACAATATAGGTTTATTTTTACATTATTTTGCTTCCACAATGACAAAATGTCAGCTGTGATGTCAGACTGAA  
ACAAGTGCAACAGATAAACTGATGGTCTGATCAAAGACATCATCATCCGGTGTGACGAGCTGTGTTAACTTTAACATA  
CAGCACCAGGAGAAATAAAAACAACGCTTGTATTCTTCAGACAACAGAAAACCCAGAATAAAGTCCAACACTGAGAGT  
CAGCAGCAGGTTGAAGATGGTGGTGGGGAGTGTGAGTGGGTGGTTAGTGGGTTTCAGCTGGCAGCAGGGGGGTTGTCTTGC  
TGCAGAGTGCACCCAGCAGACCCGGCATCTGCAGCAGGGAGTTCACGCCCTTCAGCCACCCGCATGTGAGTGTAAACCGA  
TCTCCTGATGAACTCCAGTTTGAAGTACTCGGCCATCTGGTAGGTTCTTGAGACTTTCAGACCCCTGAAGATGTTTCCGATAATGT  
CCTCTGGAGAGTAGCCAGCGCCACAGCTCTCCACCACCTTGTAGGCCCTGGTTCGATGTTCCCGTCCACACAGTGTCT  
CCAGCATGCTTTTTACCATCAGAGGGTGTGAGGCTCGTGCACACCTTGAAGACATTTCTCGCTGTTGATGTAGCCGAAGC  
CAGAGTTTGTGACTGCAGGTTGTTCAACGCCTGTCTCATGTCTCCTGTGCGGTGAAAATGACTGCCTCCAGCCCGT  
CGTCAGACACAGACAGACGCTCCTTCTCCACCACCTCCTGCAGCCGGGAGAGGATCTGTCCGTCCGTCAACTTGGAGT  
AACGCAGCAGGGCGCAGCGGGACTGGATTGGTCTGATGATCTTATCTGAGGCGTTGAGGCGAGAGCGAAGCGCGTCTG  
TCTTTGATGATCTCCATGATCCTCCTCAAAGCTGTGACTGAGCTCCATCCGTCATGCTGACTTTCATCCAAGATGATG  
TGATCTTGTGTCTCTTTTGGGAGTGTGACTTTCTGCTTCCGCAAAACATCTTGATCTTGTCTCTACCACCAATT  
CCTCTGTCAATTTGAAGCGTTGAGCTCCAGCACGGCGTCTTTCATGGAGGCACCCAGCAGCGCTCGGGCCAAAACAAG  
ATGCTGGTGGTCTTTCTGTGCCGGGAGGACCTGCGATGATGATGTTGGGACGTTTCCCTCTCTTGCGAACACCTCC  
AGCCGGCTCACTGCTCCTCGTTCCTACGATCTCGCTCAGCTTTCAGTGGACGGTATTTCTCCACCCAGGGCAGCTCG  
TAGGGCCCGCCGGAGCTTTTAGACGAACTCTCCCAGCCTCCGTGCCCGTCTTTGGCCCGCTTTCTGTGCGTTTTCTGC  
ACAGCTCAGGCTCCGCCATCTCCACGTCATGTTGATGGCTGTCTCTACTCTGTCA

>Sequ28339SNP2

GACAGGAGGAGTACAGCCGAAGTTGAGTTGAGGCAGACGGGAAAATCATTCAATCCGCTGAATCAACCAGAGGCAACA  
TCCACCGGCTGAACACAGGAAACCGTTTACATCATGGAGCAGAAACAAACCATCAACTTTGGCGCTGGACCTGCAAAA  
CTCCCCAGTCCGTGCTGCTACAAGCACAGAAGGAGCTCCTCAACTACAGTGGCGTTGGCATTAGTGTCTTTGAAATG  
AGTACCAGATCATCAGACTTCAACAAAATCCTCAACAAAACAGAGAGTCTCCTGCGAGAGTTGTTAAATATCCCAGAC  
AACTATAAGGTGATGTTTTCTGCAAGGTGGCGGCTCTGGACAGTTTCAGCGCCGTTCTCTCAACCTGATTGGCCTCAAA  
GAGGACAAGTGCGCCGATTACCTGGTACTGGCACGTGGTGTCAAAAAGCGGCAAAAAGAAGCAGAGAAATATGGCAAA  
GTCAACATTGTCCACCCGAAGCTGGATAGTTACACAAAATCCCTGACTCCAGCAGCTGGACCCTGAACCCCTCAGCC  
TCCTACGTGTACTACTGCTGCAACGAGACAGTCCACGGCGTGGAAATACAACCTTACACCTGAAACAAACGGGGTGGTC  
CTCGTCAGTGACATGTCTTCAACTTCTGTCCGACCTGTGGATGTGTGCAAGTTTGGGCTGATTTTTCGCCGGAGCT  
CAGAAGAAGTGGGCTGTGCCGGGTAACGTGTGGTATTGTGCGAGAGGACTTGTAGGCCACGCTCTGAAAGAGTGT  
CCCATTGCTTGGACTACAAGGTGCAGGCAGAGAAATAACTCCCTTACAACACACCCGATGTTTCAGTATCTACATC  
ATGGGTCTGGTGTGGAGTGGATTAAGAACAACGGTGGCAGCGCTGCCATGGAAACGCTCAACAAGCAGAAATCCTCC  
ATGATTTATGACATCATCAATGCTGCTAATGGTTTTCTATTCTGTCTCTGTGGATCAGGGTTGTGCAAGCCGCATGAAT  
GTAACATTTCCGCTGGGGAAGAAAGAGGGAGATGACGCCTTGGAAAAGGAGTTTCTGGACGGAGCATCTAAACGTGGA  
ATGATATCACTGAAAGGACACAGGTGAGTTGGGGGAATTCGTGCATCTCTGTACAACGCTGTAACACTGGAGGACACT  
GAAGCCCTGGCTGCTATATGAAAGAATTCCTCAAAGAGCACCAATAAAAACAGGCCAATGTCTCACACAGTGGCATGTC  
ATTACTTGGTGCAGTTTAAAAAAGTTTTACCTTAGTTGAGATCCATGTTGGATCTGGAAGGTGTGCCTTTAGACACCT



CAAGAACATCAAGCACAGTGGAAAGTGTGACCTTCGATGAGATTGTCGGCATCGCTCGTGTGCATGAGGCCTCGCTCCAT  
CGCCAGGGAGCTCTCTGGAACCATCAAGGAGATCCTGGGCACCGCTCAGTCTGTTGGATGCACCATTGATGGCCGTCT  
TCCCATTGATGTCAATCGATGACATCAACAGCGGCAAGTTCGAGTCCCATCTGATTAATGGAGTCCAAAACAGTAAC  
GGTGTGATCACCACTCCACCCCGGTTCAGTACTTCTACAACCGGGGCATCACCGATGAGCAGGAGGGGTTTCGAGAG  
GGTTTTGTAAGCCCTGGACGAGCTGCACAAGATGAACCAGATGCCCTCCTAACGTGTCCATCGGTGCCGGTGGGA  
GTTACGACGTGTTACGCGGCGCCTCTAGTGTCTTCGGCTCCGCTTGCAGCCGGAGCCTCCTATCTACACAACACTG  
AACGCCACTGCCCAGACAGGCTCTCTTCCGCATCCAGCTACCCACAGCCACCATCAGCTACCTGCCGCCACAC  
CAGCAGAGCCACCCGAGACCTCGACGCACGGCAGCACCCGTTCCAGCACTCGCTCCCTGCCTCCGGACTCCATCCG  
CAGCGGCTCGTCGCTCTGAAAGAGGAACCTCAGACGGTGCCTGACCTCCTGAGCAGCGACGGCTCGCTCCGATGTCT  
CCCATCGACTTGGAGACCCAGGAGAGGATCAAGGCGGAGCGCAAGAGGCTGAGGAACCGACTAGCGGCCACCAATGC  
CGGAGGCGCAAGCTGGAGCGCATCGCCCGCTGGAGGAGAAGGTGAAAGTTTTGAAAGAACGACAACCGGGGCTCTCC  
AACACAGCGTCGGTCTCCGGGACCAGGTCCGCCAGCTCAAACAGAAGTCTGACACATGTGAGCAGCGGCCGTGAG  
CTGATGCTTACAAGCAAGATGGAGGCGTTTTAAACAACAGAGACTTATTAACGACTGAAAAGTAATAACACTGGAGT  
CATGTTCTGCATGCCAGCACTAGAATACCGGTGATGCATTGTCAGCACTGGCAGCATCACAGGGCCGGGGGTATG  
TGTAGACAACCTATAGGCTATTTAGGGTGAATGACTGATTGAAATGGTACTTCCGGATGCTGGACACCGCTCAAAG  
GACCATGTAACCCAGAACCCAGGGCAGCATCCAGACTGAGAAAACACAATGTCGGCCACTGGCCCATGAGTCGGGTT  
TACTAATGGTAGCCTAGAAAATGGGAATGATTATTTGTACTTTTGCAACTGATATTGTCATGCAACATGCTACATTTA  
TTCTTGTGTAATAATTTTTGTTTTGTCGGTTGATCCAGACAAACGTATGATGTCCAATGTTTACAATGTCTTTTTT  
ATTTGTTATGTGATTTAAGTAAAGTGTCTTCACATG

>Sequ28372EST2

GGAGGAATGAACAACAATAGACACCTTCACAGCGACCCTTATCTGGAGACGCTTTTCAGCTTTTAATTTTTTCTACA  
CTTAACATAAGGTCTTGGGGTCAAGAAAATGGCCACCTCAGCAAGTTCAAAACCTGAACAAAAGCTGTAAAGCAGCAGTA  
CATGGACCTCCCTCAGGGGACAAGGTCCAAGCCATGTACATTTGGATAGATGGCTCTGGAGAGGGACTACGCTGCAA  
GACCAGAATTTGGATTCTGAACCGAAGACGATTGAGGATCTTCTGAGTGGAACTTTGACGGCTCCAGCACCTACCA  
ATCGGAAGGCTCCAACAGCGACATGTTCTGGTCCCTTCAGCTATGTTTCAGGGACCCGTTTCAGGAAGGACCCCAACA  
GCTGGTGTCTGTGAAGTGTCAAGTACAACGGGAAGCCAGCAGAAACCAACCTGCGTCACACCTGCAACAGATCAT  
GAGTATGGTGGAGATAACCCACCCATGGTTCCGTTATGGAGCAGAGATACACCTCCTGGGCACAGATGGACATCCCTT  
CGGCTGGCCCTCAACGGCTTCCAGGTCCACAAGGGCCGTATTACTGTGGAGTGGGAGCAGATAAGGCATACGGACGA  
GACGTAGTGGAGGCGCACTACAGAGCCTGCCTGTATGCTGGAGTTCAGATCTGTGGAACCAATGCTGAAGTCATGCCA  
GCTCAGTGGGAGTTCAGGTCCGGCCGTGTGAAGGTATCAACATGGGGGACCATCTGTGGGTCCGCCGCTTCATCCTT  
CACAGGTTGTGTGAGGATTTCCGGCTGGTGGTGTCTTTTACCCCAAGCCTATCACAGGGAACCTGGAATGGCGCCGGC  
TGCCACACCAACTTCAGCAGCAAGGAAATGCCAGAGGATGGTGGACTGAAGTTCATCGAAGAGTCGATCGAAGGGCTG  
TCAAAGAGACACAGGTATCACATCGGGCCCTACGATCCCAAGGCGGGCTGGACAACGCCAGACCCCTCAGCTGGTCAT  
CACGAAACCTCAAACATCGAGGAGTTCAGCGGGCGTGGCCAATCGGGGCGCCAGCATCCGCATCCCTCGCTCTGTG  
GGGCAGGACAAGAAGGGCTACTTCGAGGACCCCGTCCGTCCGCCAACGCGACCTTACATCGTCACGGAGGCTCTG  
GTGCGCACGTGTTTACTGAAAAGAAGAAGGAGAAGAGCCACAGATTACAGCAATGAACAATGCGAAAACAAACAGTCA  
TTTCCAGTACTGTATTTAGCCTCGTGTCTAGTTTCAGGAGCATGGATTTAATTTTTTTTATTATTTTTTTACTTTGACGGA  
TGAACAATGAGGTGTTCTGCATTTCTGTGGATTTCAGTTGTATGATGAGAAGTCTTTGATAACATAAACACTGCCTT  
TCTGTACAGCAAGCGTTCGTGCACGGTAGCTGATCATTGTTGATGAGTACATTTATTGTAATGATTTTTAACTTTGACT  
AATAAAGTGTCCAAGTGCAGCAGGAGGTTGCTGTAGATCTTGTACCTTGACACAACAACGATCCCAAGGCATCTGA  
ATGTTTTTTAGCAGTCTTGGCCTCTGTATGTGTAGATAGTTAAGGTCATTTGTGTAAGCAATCTACTTTTCTATGTT  
TTTTTTTTTTTTAATAGCATGTCTTGTGTTTTTTTTTCACTTGTAAATGTGACTTGAAGAAGTCTTTAATAAACAG  
CTAAACAAAAATTTTTTAAAAAAAAAANAAAAAACCGAAAAAACCTACCTAACTAAGTAGTAAGTACGTAGG

>Sequ28393EST2

GAAGAGCGGGAACGCAACAACACGAGCTCAAACCCACCTGTACTTACCTGAAAGCTACTACACAAGATCAGCATGGC  
AAACAAAGTCTGCTATGGTCTGAGCCGTGAGGTTTCAGAGCAAGATTGATAAGAAAATACGACCCGGAACCTGGAGGA  
AAGGCTGGTGGACTGGATCGTGCCAGTGTGAGCCTGGTGTGGGCCACCCGAGCCAGGAAAGACTGGCTTCCAAAAC  
TGGCTCAAGGATGGATGTGTGCTGTGTGAACATCAACAGCCTGTGCGGAGCCAACAAGCTGGTCAAGACCATCAAG  
ACCTCCGGCATGGCATTAAAGCAGATGGAGCAAACTCCATTTCTCAAAGCTGCAGAAAAGCTATGGAGTCAACAAA  
ACTGACATGTTCCAGTCTGATCTCTTTGAAGGCAAAAGACTGGCTGCCGTCCAGAGGACCCCTGATGGCTCTGGGT  
AGTTTTGGCAGTCAAAAAGGATGATGGGAATTACAAAGGAGACCCCAACCTGGTTCATAAGAAAAGCCCAAGAGAACAGG  
AGAGACTTCTCAGAGGAACAGCTGAGCGAAGGCAGAAATGTCATCGGCCGCAAAATGGGCACAAATAAAGGAGTATCT  
CAAGCCGGCATGACAGGTTACGGAAGACCCAGGCAGATTATCAACAACCCCTGAGGCCAAGCAGTGTAAACGCTCC  
TCCAATACCCCTCCTCTCTGTCTCTGAAAGGCCAGTACGCGAGGAAGGAGAACTCTTACTCTTACCTTGGCCATT  
AGTGGAATGTGACCTGACTGCTCTCAAGACAAAACCTGGACCAAAACAGGACCAACAGGAACATGTGCACATACACA  
ACACACACTCCATGTTGAGGAAAACACACAGAGATAAAGACTTTTTAAGTGATTACACAATTAGACAGAGAATTTTACA  
TAGTATTTTTTACAGCAACACACTTCTAGGCCACCTTGTAAATAATACTTTTTTCATAAAGAATCATTCCAGATGTTTT  
GCATGTCTTAACTACTACCTTAAAATCAGATGTACTTTTTATTTCAACCATAAGAGTTTAGATTTCTTACCTTCCAG  
ACATCCACTGGTCCAGTTCACTTCAGTACACTATAAAAATCAACAGGTAGTACTTGTAACTCGCTTGGAGAGAAGTA  
ATCCATCACATTAACATTAAGTTTTCTACATTAATGCAACATGGTAATGCATTCAGGAACCTCTTTCATAACTCTTC  
CTGCATTCAGGGCCTGACATCTGAGATTTTTAGACTTTTTAATGGAAAGAAAACCAAAATCCATATTTATTTTCA  
TGGTGCCCTGTTTGTGTTTCGTCAATCTCCAGTTTTGCTGTTTCTGACAGAGTAGCTGCAATTTCTTGAACGTCAGG  
ATGTCCTTGAATGCACCACGGAGGACAGTTTTGAAAAGTTCCTGCTCATACTGCGAACAACAGCATAGCATAAC  
TGTAATGTTGCGTTAAACAAACATGAATGATTAAGAGTAAACTGAGCAGAGTGTTCAGTGTGATAGATTACCTGTCTCA  
AACAATTTCAAGTCTGTGCTGATTCATTGATTACTGGAATGAACTGAAACAAGTGGCAGCCTGGAAGGTAAGAAGTG  
TCTGGAGTGTGTTGTTTACAATAATGTTAAGTACATAATTTGAAGTATACATAGATCCACCTGTATAATTTAGAAAG  
TGAATTCCTAAAAAGTTTTCATGAAAACATAAAAATACAGTTGTGCGTGTTTTACCTGCTTACATAACACAGTCTGTTA  
ACTAATTTCTAATCGATGTTGGACCTTCTTTTTAGAGTTGAATGGACGATGTTGAAATAAAAGTTTGATTTAACTGAAC

AAAAAAAAAAAAACCG

>Sequ28408EST2, Sequ28408SNP2

AACGTTTCAGGTCGGCTCACGTTTTACTCTGGAAGTGTGGCTCTCGGCTTTAAGATGTACGGATCCTTTCCGGGT  
GCTGCTGCAGGTGCTGTGGGCCAGCTGCTCTGTGGGTGGTGTGGGCTCAGAGCAACTTTTTGAGCTGCCAGACAAC  
GCCAAGCAGTGTCTACGAGGACATCATCATCGGCACTAAGTGCACACTGGAGTTTCAGGTGGTGACCGGTGGCCAT  
TATGATGTGGACTGTCGTTTGGAGGACCCAGATGGAATAACACTCTACAAGGAGATGAAGAAGCAATATGACAGCTTT  
ACCTTCACAGCATCCAAGAATGGCACCTACAAGTTCTGCTTCAGTAATGAGTTCTCCACTTTACAGCACAAGACGGTT  
TATTTGACTTTTCAGGTCGGTGATGATCCTCCACTCTTCCCCAATGAGAACAGAGTCACTGCTCTACCCAGATGGAA  
TCAGCTTGTGTCCATCCATGAGGCCCTGAAATCAGTCATCGACTACCAGACACATTTCCGCCTCCGTGAGGCTCAG  
GGACGCAGTCGGGCGGAGGACCTCAACACCCGTGTTGCGTTCCTGGTCCATTGGAGAAGCCATTATCCTTCTGGTGGTC  
AGCATTAGCCAAGTGGTCTGCTGAGAAGCTTCTTTTCTGACAAGAAAACCACTACAACACGTGTGGATCATAACAG  
TCTCTGAGCTCTAGATCTGATTCATCACTTTCTTTATTTTTTACCTGGGCTTGTGTGCATAGAGTCTGTTTAGAACAGC  
AGTGCAGATCTGAAATTCGATCATATCAAACCTGCCAGGTCTACAATCTGACATGTCTATCCCATTCAGCACTGCTGT  
TCTTATAAACCTTATGCAACTGAGTCTTGAGCAAAAAGGTTGTGTGTGTATAAAAATGTTTTTGGGGGGTTAAAGAAAA  
AACCTGAAGAAAGGCTTGTATGGTGTGGCTTGGAACCTATGAATGTCTTGTGTTTGAAGCAGTTCAAGCAGCTGGTCAATATAGTTAA  
AGCAAACCTTATGTAATTTGAAATAATTTCTGAATGTGTTCTTATTTTATTTGTGTCTCGGGCCCCATC  
ATCCCATACCCCTCTCTCCAAGATCTGATGCATTTTTTGGCCCCGATTGTGCACTGAAATAACCAAGGGAGTGGAAAGT  
TGTAACATAATGTAATATAAAGGATGGTCTGGTATTTTTCTTCCCTTATCTGCAGAGCATTTGGTCAAAAAAAC  
ACACTGGCAAGGCAAAGATTGCATTTGGTTATGAAAAACATCTGTTTTTTTTTTTTT

>Sequ28411EST2

ACATGGGACCTTCAGCCATTTTGACCATGTTAGGAGCTGTGGGACGCTGCTGCACCGGGGCTCTGCAGGCTCTCAAGC  
CTGGGGTCCAGCCCTGAAGGCTCTTGTGGATCCCCAGCCGCTCTTTACGCAGAGACTATGTGCGACCTGCCGCCG  
CTGCCAGCGTCGCCAACGGGCGTATTGTGGCTGTCATCGGTGCCGTGCTCGACGTCCAGTTCGACGAGGGCCTTCCTC  
CCATCCCTCAACGCTCTGGAAGTCTCCGGCCGCGAGTCCAGGCTAGTCTGGAGGTGGCACAGCATCTTGGGGAGAACA  
CAGTGCCTACCATTGCTATGGATGGTACTGAAGTCTGGTCCGTGGACAGAAAGTGTGGACACCGGTGCCCCATCA  
GAATCCCGAGTGGTCCCGAAACCTGGGCAGGATTATGAATGTCTTGTGTTTTCATCGACAACATCTTCGCTTCACACAGGCTG  
CCACCAAACAGACTGCACCCATCCACGCTGAGGCCCTGAATTCACTGACATGAGTGTGGAGCAGGAGATTCTGGTCA  
CTGGCATTAAAGGTTGTGGACCTGCTGGCCCCCTACGCCAAGGGAGGCAAGATTGGTCTGTTCCGTTGGTGTGTCG  
GCAAGACTGTATTGATCATGGAGCTGATCAACAACGTGGCTAAGGCCCATGGTGGTACTCTGTGTTTCCGGTGTGG  
GAGAGCGTACCCGTGAGGGAAATGACTTGTACCATAAAATGATGAGTCTGGTGTCACTCAACCTGAAGGACACCACCT  
CAAAGGTGGCGTGGTGTACGGACAGATGAACGAGCCCCCGTGGTCCCGTGCAGAGTGGCTCTGACTGGACTGACAG  
TGGCTGAGTACTTCCGTGACCAGGAGGCTCAGGATGTGCTGCTTTTTTCATCGACAACATCTTCGCTTCACACAGGCTG  
GCTCTGAGGTGTCTGCCCTGCTGGGTGCTATCCCTCTGCTGTGGGTTATCAGCCCACTCTGGCCACTGACATGGGTA  
CCATGCAGGAGAGAATCACCACCACCAAGAAGGGCTCAATCACATCTGTGCAGGCCATCTATGTGCCCGCTGATGATT  
TGACTGACCCCGCCCCGCCACCACCTTCGCTCACTTGGATGCCACCACCTGTGTGTCCCGTGCATCGCTGAGCTGG  
GTATCTACCCCTGCTGTGACACCCCTTGGACTCAACCTCCCGTATCATGGACCCCAACATCGTCCGATCCGAGCATACG  
ACGTCGCCCGTGGTGTGCAGAAAATCCTCCAGGACTACAAATCTCTGCAGGATATCATTGCATCCTGGGTATGGATG  
AGTTGTCTGAGGAGGACAAGCTGACTGTGGCCCCGCGCAAGATCCAGCGTTCCTGTCCAGCCCTTCCAGGTGG  
CCGAGGTTTTCACTGGCCACATGGGAAAGCTGGTGGCCCTCAAAGAGACCATCAAGGGCTTCAAGAGCATCCTGGGTG  
GTGAGTACGATCCTCTGCCGAGCAGGCTTTCTACATGGTGGCCCCATCGAGGAAGTGTTCAGAAGGCCGAGAAGC  
TGGCTGAGGAGCACTATAAACATTAATCAATCTCAGTTCTGTGGAGAAGAAAATCAAAGAGAAGGGGGGGTCTTT  
GGTTAAGGAGCACTTGGTTTGTAAAACATGTCAAAAATGCAAAATGTACCTGTCTGTCACTTCTGAGAGAAAGTTCTAT  
TTAATGTTTCCAATGAAAGATGGAATAAAAACACTGTCTTTACACAAAACCTGTCACTGTATATTTCTATTATAGGC  
TTTCATATTTGTAGTTGAAAATTTTGTTCCTAATGGGAAGTTTCATGAAAATGGCTGTCACTACTCTGACCACAAAG  
TGGTGTCTTGGAGCCATGTAAGCTACTTGAACCTGTGTTGCAGCTTGTACGTATTTGAAAATAAACGGCGGACAAAAC  
AAAAAAAAAAAAAAAAACGAACGACTA

>Sequ28458EST2

GACGGCAACATGGCAGCCTGCTAACAAGAGCTGTGATTCCCTCCGCTCTGACGGTCAGACTCTTAAACTTCATCATGG  
AGCCAGACACCGACAGCAGCAGACCGGCTGGTCCGTAACGGAGGGCTCGGGAAGGTGATGACGATGATGATGTGTTTT  
CGGAGGATTGCTAATGTTTCGCTCTCTGGTGTGCGCCGATCTGCGGGTGTGTGCTGGCTCGAGCCTGCGTCATGGCGG  
CACAGACAAACACCTGTCACTGAGTGCAGGAGGCTAAAGCGGTCTCAGGTGAGCGGCTCGTGGCTCGTCAAGCTCAA  
GGGACGGACAGCCGCTCGGGTGTGGAGTGGGATCCTCCCGCAGGTAACCCGACAGGCTGGCACGAGCAAGGTAAT  
GTGTTTCTGTACCGGGGAGGTACAGAGAGGTACAGCGGCTAGCTTCCGGTCTCTGCTGTACCCAAATGCTCGTGGGCTT  
TGCAGCGGAAAAGCAGGAGACACCGGACAGCTCCCCCGCAGCGCCGCTGAAGCCGGTGCAGTACCTGGACAA  
GGACTGTTCAAGTTCAAAAGAGCTGTATGAGAACCATGGACAATCCCCAACGTGTTGTGTGTTTCCCGGATTTTGTCT  
GCTCCATTTCTGGGTCACTGATCATCCAGCAAGCACTTTACCTCAGTCTGGCTCTGTTTGCATTTGCTGGCGCTAC  
TGACCTGTTGGATGGTTACATTGCCAGAACGTGGCCAACCCAGAAGTCCGCGTGGGCAGCGCTCTCGACCCCTTTGGC  
TGACAAAATTTCTGTCAGTATTTTATATGTCACTCTACCTATGCTGAATCATACCAGCTCCGCTGACGGCTCTAGT  
GATTTTCAAGACATTTGGTTTGTATAGCTGTCTTCTGGTTCAGATACAAGACCGTACCTCCACCGGTGACACTCAG  
TAAATTTTTTAAACCCCTGCTACACCACAGCTCAGCTCAAACCCACACTGTTTCAAGCAAGGTAACACAGCCATCCAGCT  
CTTTCTGGTTCGACCTCTCTAGCTGCTCCAGTCTTCCAGTATACAGACAGTGTCTGCTGCTGATGATGATGATGATG  
AACAGCGGTGACAACCTGCGGCGTCAAGGCTATAGCTACTGGCACTACGGGCGCAAGACTGTCCAGGTAAGTGAACACCAG  
ATCGCCATGACAGCCACACCAGGAAACACCCAGAGGCCAGAACAAAAGCCGGAATAGCCGCCGAGAGACTCTGATC  
GTCCGTGGCAAAAGTCCGACGGACAGATGGACGATCGCCAGGAGCATTGAAACCAAGTAGCTGTGACAACCGTTCTGTG  
AGTACCCGTGGCAATGACACGTAGAAAACCAACCAAGGCCGAGATGGTGTACTGCGAAAACACTACAGAGACGCCTAAC  
AACAGCTCTGCTGACTGGCTGTGGACAACACACAGATAGAAACAGCTAACACACACATACACACACAACCTATACAC  
ACACATGTCAGGTATATGTCAAGT

>Sequ28469SNP2

GTCTCTGGATAACAACAACACAGCTGCCTGCACTAACCCCTGAGGTGAAAAGACAGGTGACGATGACTGACCTGGAGAC  
CTCGATGGCCACCACATTGCAGTATTTTTCAGAAAGTATTCAGAGAGAGAAGGAGACAAAACACAAGCTGAAGAAGAGCGA  
GCTGAAGGACCTGCTTCACGATGAGCTGCCGGAGCTGATGGCGCATGTGAAAGACCAGGCCACGCTGGACAGCCTGAT  
GGAAAGCCTGGACACTGACGGCGACGCCGAGTGTGACTTCCAGGAGTTCATGACATTCATCTCCGTGGTTACCGTCTG  
TTGCCACGAGTTTTTCGAGCATGAGGACGAGTAAGGGGGGAGCTACAGTAAATATAAAGAAGCAGTTAAGCCTAGCAA  
CCTGCCGATGATGCCCTTCAGAGCAGCGCAGGGTGGGAAAACACAACCTCCAGCCAGCAGCCAAAAGACTATGGGTGAGG  
TTGGCTGGTGGCTGACAAAACAGTCCAGTCTCGTCCCTCAGCTTAGTCGTAGCGATCTTACCATTTTCTATTCTTCATCA  
ATATCTACATCACTTTGAAAGCTGAGATTTGGCATCGCCACGAAGCTCGTTACAGACCAAGCCACTGATTTCTAAAAG  
TCTACCCTTAATTAAGTAGTTGAAATTCCTTAACAACATTTTCACACGTCAGACAGATGTTTAGAGCTCCAGTTGGC  
TGCAGAAGTTCAGCTGTAACTTTTTTATTTATGTGCTTTTTAAAAGCGGAGTGGCTAACTAGCTACTTGGCTGTAGCG  
GCCGCACGAATCAATCCACTATCTAGAGGGGACTGTTTGGAAAGTTTGACATAACATAGCTGACTCAAACCTTTAAAAG  
TTAGTTCTTATATTAATAAATAGATTGGCTAGTGAAGATTCAAAAATGGCTTCTGAGTTTCAGCCACTTACTTTG  
GAAACGGCCAAACAGTTCGCTCGCCCTCCACTCATCCCGTGGCGATCAACCAGCTAATTAGCAACACCTGTGCGAGA  
AACAGTTTTAGAAATGACTTTGAGTTTTAGTTAATCTAGCTGCCACTTTGGAGGCCACAATTTAGGGGTTTACCAACTG  
TTATATTTTAAAGAAATGGCAGATTTTTAAAAATAATGAAATAAAAGCAACTGGCTGGTAGGTTTTGGATGTGGCT  
GGAAAGTTCCTACTGGCTTGTAAAATAATTTAAGTGGTTGATAATTGCCCTTTGCTCTGTGTTTTGCTTTATTTCTTGC  
CCAGAGGCTCTTTTTGGAAAATCTTTTACTTTCATACTTAGGTAATAAATAACGACAACCTATTTGAGACATGAGAC  
CTTCCAAACGCTAGTCTGCTGTTGCTGTAGACGAGTTTCCCTCCCTGCTTCTGCTGCAGGTTTGATCCTGTTAGAT  
TCAGTAGAAAACAATCTAGAAAACAATCTAAGGAACATGTACATGCAAAAAA

>Sequ28503SNP2

ACAGGGACTGGGTGGTGGCTTTAGACAGACAGTGGAGCCCAGCCCTCTGACCCTCCACCCCGGGTAGCCATGTAATGC  
CAGTCACCTGCCCTTCTCATGCTGTATAAAAAACACACACATATATCTGTGTATTTGTAACCTGAATCTTCTTGTGT  
CTGTCCATGCAGACAATAAAAAACTGTACAGTAGGTCTAGTTGCATGTAATCTGTAATAATTATTGACAATGGCATT  
TAAAATGCAATAAAATACTTATTACACTGCCAAAAAAGAAGAAACAAGAGATTTTATTGATATTCCTCAAACA  
TTTTTTACACAGACATAAATATGACAGACCAACTACAAGTGAGTATGTTAGTTTTCATTTATTTCTGTTCAAGCAA  
TTACTTCTTTGTACAGTGAAGTGTGGATGAATTGGTCTAAGCAGCAGGTAACAGGCCGCCGATCTATCTAGACTAC  
ATCAAGATCAGAGCATTACCAGCAGAGGGGAGGGGGTTCGCGGATGACATGTTACGCCATGCATATACTGCAAAAGGT  
GTGTGCAGTGAATTTCCCGTTCGAGCCTCGCCGTCTGTACGGTGAACAGTGTACAGCGCAGCATCCATAGGCCGTC  
TGCAATCAGACGAGCTGGGTTTGGGGAACAGTGTAGCCAGCCAGCCAGCCCGCCCGGGTGCCTAGCTGTCTG  
TTGAGGATGACTATGAGGATGGAGAACAGAGGCGGTGAACCAGGTGGACAGGAGAGAGGAGGAGGAGGAAGAGT  
CTGGGGGGGTAGTTGAGGACGTCATGGGGAGTC

>Sequ28542EST2

AACCAATTCACATTTTATTAGATCTTTTTTTCATTAACAAACTGGTCCAGAGTCATGGAAAACAAAAAGGTCCC  
TCCTGACTTGAGATACCCTGTGGCTTTCACATAGACTACAGTTTTTACAATGAACAGATACGCACAACAGTGCAGTCT  
CAAGTGAGGACTCTGCCCTGACATTTGTGTTTGTAGTGGAGCAGTGTTCACAGATGCAGTCCAAACCACTGTGCAG  
CATCAGCAGCTCCACAGCAGCGCTGTTTACTCAGCTCTGCTGTACAGTTCGAGTTCGAGTTCGAGTTCGAGTTCGAG  
TTTGACCTGTGCAACAGCTGTTTACTGAGTGGTCTGAGAGGTGGCTTCTCTCTGCTGCATGAGATCAGCATGGCCCTTA  
GTAACACCCAGCCATCGGGGACAGCCATGGAGGGACACTGGGGCCGACCGGAAGCTGGCTTCAGGTTCTCCAGTAG  
TCACGGCGGGTCTGGCTCTGACCCAGGGCTTGGTGTGCATCTCCAGACCAGCACCAGTTCGCGTGTCTCTGAT  
GCAGCTGGGAGGAAGCTCTCTCAGGGGCCAGCTCCTTGCCACAGCCCTGATGTGATAAGGCTCAAATCCACAGCAG  
CCACCAATGAAGTGAATGCCAGCATTGTAGGCCTCCCTGGCGTACTTTGTGCATGTCCAGCGGCTCAGAATCCTGGGC  
TCCAGACCGAAGGGGAACCTCTGGCAGATCGATGAATCCCTGACAGTTCGAGTTCGAGTTCGAGTTCGAGTTCGAG  
ACCATGTAGTGAGCCTTGAGCCAGCCTTCTCCACTCCCTCCTTTCATCATCTTGACAGCCTTCACACAGGTTCATGGG  
TCAAAGTGGCAGTTGATTCCAACAATCTGGGCACCAGCTTTGACCAGCCTGACAGCGCACTCTGCAGGAGAGATAACCG  
TGATGTCTCCGTCTGGTCCGATACACAGAGAAGCAGC CACGGGCTTCCCGTCTCCTTCAGCACCTCCACAGCCAC  
ACGGCCTCTTCAACATGCTCAAAGTACTCAGCAATCAGGAAGTCCACGTCCTTTCTTGTGTAACACATCCAACCTGTTT  
TTGAAGATGGCCTTACGCTCTTTCTCAGCTCTGACAGTTCAGTGGAGTTCGAGACTCCTCCGGCAACCCAGA  
CGCTCGCCCTCATTTGGCAACCTCACGGCCAGATCGCAGGCGCCCTATTGATCTGAGCACCAGTGAAGGTGAGCTT  
TTGCCCTGTTCTCCAGTTTGTATCACTGGCATAGAAGGTGAAGTCTGCATAACGTTGGCCCCGGCCCTCAGGAAC  
TCCCTGTGCAGCTGTGCGAC

>Sequ28622SNP2

TACTTAGTTAGGTAGGTTTTTCGGTTTTTTTTGTTTTTAAATCTTTTTTATTGTTTAAATTTTTTATTATTTT  
AAAGTTATCCATTCCAGTGTGAGGACTTAGTGCATCACTGACTATATGTAACAACCATCCATTCACCTACCCCCAG  
AGAAAAATTTGGAAAATAGCTGGTAACAGATCTGGTGTACCTCCAGTATATACTGTATACTTAAGGTAGAGTTATA  
CTTGTGCGTCACAATGTACAGCAACCTTGTCAAGGGGTCTCTGGTGTACTGAAACAGGAGAATATAATACCATGTAG  
TCATTCATAGCCAAAGCAAACCTGCTTACGTTCTTTTCACTTTGCAATAGACAGTGGCAATAAGAATGAGTAGGTTT  
TAACAGAAAGAGCTTTGCTACATCACAGAATATGTACGGTGAATCAGTCAATTTAAGATTTAAGCTTTAATAACTCAC  
TTAATGTCGCTTCACTATCGACACCACTGCCACTTCCAGCAGGTTGGAAACTTGTGAAAGAAAACACAAGAACA  
AGCTCGCCAACTACTGTCTAGCTGCTGATATTTTTAAGAGGGTGCACGTTAGTGTAAAGTGGCTGTGTGATAGG  
CTCTATGTTTTTACTGCACAGCCTCCCAACACACAAGTATAAATCCAACCTTACTCATAAAACTGACTCACTCTC  
TCTCTCACACACACAGTAATGCAGGGGTTTTGTGGAGTGTCTTTATTACAGGCGTCTTCTGGAGTTTTGGGGCTGTCTA  
AGTGTGGTAGGAGGACCTGCAGGGTTTTAGTCATACACCAGGAAAGACACAGCTGTGTCCCTCTCTTCTTCCAGCT  
CCGCTGCTGTGGCGTCCATCTTCAATCGGGAAAA

>Sequ28651EST2

GTGGGTCTGCCTCTGTGACTGAGACAATATATGACAATGGTTTAGTTGCTGACATATAGTAGAATCCAGGAAACACAA  
AGAAATGTTAAATGATCTTGCTATTAAGTTACCTTTAATGTAATAATGCAATACACATGGGTTGCCTCAAATGTA  
ATCATACATTAATGGAAATGCTATACAGTGTGAAAGAAGTGGAGCGGGAGAGACCATATATAGAGTAGAGCAACACA  
ATGCACCAAGGCCAGGAGAGAGCAAAATGCCAAATATTGTGCACATATCTTGAGTACTGAATGACAATGAAACAC  
ATCAATCCATATCTCTTCACTCACATATTACGTTTAACTTCTTTAGATTACCCCTCAAAAATAAGGGACAAACTTAG  
TAAGTTGAAATCTTGCTCTTCCAAGGCGTGTGACCATCTGGTGAATCTAAGAGGAGGAGTTGGGAGCTCCAGCAGCTG  
AACCCACCGTGTGGTGAAGTACAAGATGATCCCAGCCTACGGTCGTACAGGTGTTAGAGCCCCCGTGGAGCCAGGATA  
CACCTTTGACAAAGTCTGGTGTGCGCCGATCTCTCAGTATTTCTTGCAGTTCGGAGTCCATAACAGCAAGGGAGCAGT  
CATCGCTGACAGTAGCTAGCAAGGGGGCACTATGTGTGGAGAAGGCGAGCCCACTAACTCTGCGGCTGTGGACGTTCT  
CAACTTGGGCGGGCTCCGTTCCAAGGAAATCTTTCACTGTCACTCTGCCGAGCTCATCAAAAAGCAATGGTGCTTC  
TGTGGTGGGGGTGCCACGCTACAGTGGTAGGTGAGCAGCTGGGGGCTCTATATCTATTCTTGATGCTGGTTTGTGTTG  
GCTTCTCCTGTCCCACATCAGCACACGGCCATCTTGACCACAGGAGATGAAGAGAGACTCGTCTGTGGGGACTGCAG  
GCAACACATCTGTACCGGCTGTGTGTGCACATTGTAGGTAGTGAACCTGTCTCCTGACTGAGATCCCATACTTTAACT  
CTGCAGTCCATGCCGCCAGTGACGGCACTGCTTGTCTCCAGTTATGGGGTCACTGTAGTGACAATGTGGTCTATGCTCA  
TGTTTGGTGAAGCAATTCACAAGCAGGCGTTCATCTCCGCCAGTTCAGAGCTCCAAGGCACCTGAGTCTGATGCA  
ACAACAACACCCTTTCTGACACCCATTTACACATCTGTGACACTAGCCTCAGTCTGCACACCAGCTTTGCAGAAACCC  
TCATTGGGGGCTTGTCTCAGGGTCACTGTAGATCCACACTGACCCCTGCCAGTCTCCTGCCAGTGAGGCTAGAGGCCA  
AGCAGCAGGGTGCATCTGCTCTGTATTGCGCCGAGCACAGATGCTTCTCCATGCACGCTGGGGCATTGGGGGTATG  
TTCCATCGTTTTCTTGTATCATGCTGGTGTCTACTGCACTTTTTCATTACAGGTATCGCAGTAGACTTCTGTGATTTT  
GCAGGCAACTTAAGCGCAATTTCA

>Sequ28656SNP2

CTACTCCCTGTGTCGTCGTTGACAGTCTCTAGTTTTTTTTTTTTTTTTTTTGGACAAGAGAATCTTTATAAGAACAATTTAT  
TAAAACAAGTACATTTTCAATATTTAAATCATAGTGTGAAAAATAAAGAACTTTCTTCTGACTGATTTTTAGCAACA  
AACAGTCTCAAAAACAACCATCACCGGTGGCTGATGCCTTACAGGCTGAGGCACTGATGGCAAATGGATGCTTGCTG  
CCCTTCTGGTGTTCAGCGCAATAACACATTCAGTGTCCGAGTCCAGAGAGAAGGGCAAGTTCAACCTTTTCCCTTCC  
TCTGTTGAATCCTTGTCTCACTCCAGCACCTTTCTGAAGCCCGCTTGCCCTTCTGACCTTTAGATTTGAATGTTT  
TGTCTTATTTTTCTTCCACCAAAATTTTTTTTTTCCCTTCAAATTTCTTCTCCACCAAAATTTATTTCTCTATCGC  
CAGGTTTTCTTGCCTCTGAATGTCTTTTCCCTCCAGGATTCATTTTTCTTCCAAATGCTTTCTCCCTGTCCCGGATTTCT  
TCCATCCTTTTCCATTTTGTCTCTGTGCTGTCTCCTCCTGGACCGTTTTCTTCTTGGCGATTTAGTATCACTGTCTTTTC  
TCGACATCTTCTCTTCTTGGCAGGTCCGTGAGACTTTTTCTGAGCTCCGCCCTCTTCTTGGCACTAGGGAACATGTCTT  
CGTCTGGCTCCATTCCTACAGCTTGTCTGTAGTACTCCACCTCATCATCAGATTCAGCGACAACCTTCTGATCGTCT  
GCATGCCGGGATCCTCCACCTCACTGTCTCTTACGTTCTCAGCATGTTTCCGCTTGATGCCCTCCAGGCTGTTTTTCT  
TGTGCTTCTCGTTTTCTCTTTTTTCTGAGCAACATTCGCGCCTGTTTTTTTTCCGCCGATCCTCCTCTCTTTAACT  
GAGCCTCCTTCTGTTCAGGATCTCCTGTATTTCTCCTCTGTCTTTGAGACGAGAGCATGATAAAGGATGTTCCCTT  
CTCCCATGCCCTTCTGGATCTTCTGTGCTGCAGAGTGCAGAGTGCAGGACCAATCTCGGTCAAACGAACCCGCACTCTGTT  
GGGACGCCATGTTGCTCTCCAGAGTAGACCTGCGGCAGCTCGGTGATGTTGTGCTCCCATCTTGTCTGCTTCC  
TTTCTGAGAGGTTCCGCCCTTTCATCAGCAGCTCACTGATGTCTCAAACCTTGTCTATGTTGGGGAACCTTCTCTGCA  
TCAGTCTTACTCCACGGCTCATGCCGACAGGACAGCTTCCAGACTGTAATGTGAAATCTATCTCTCTGAGACG  
CTGGTTGTAATTCAGCAGCACACACCTCTTTGATGTTGTTGAGGTTACCTTCTGCACATTAATGGAAGGAAACATG  
TTTTGGAACATGGTGGCCATGAGTTTTATGTGCATGCCATCAGATCCAAAGTTATTGAGGATGAGTAGTGGATGGTGT  
GTGAACCTGCTGCTGTCATCCTGTGCTTCTTCCAGAGATGAAACCACGCTTTGATGAGCGAGTACTTGGAGACTCTG  
AAATGAAGCATGGACCTTTGGGAAGTCGAGCAAGTCTCATGTTGATACTGCTGGTGGTCTTGTGGAAGATCATGAAG  
TGTGTCACTCCAGTGGTCTGCAATGGCCACAAAGTCTTTCAGCACATTTCTTTTCTTAACTTCCAGAGACTCTGCG  
GTGATGGGCTCCATGACTCTCCGACGTCAGGATCAGTCACTGACCCAGTTTTTCCCAATCTGACCCCGATGAAAGACG  
AAGGATGGGGACAGCTCCGTAGATCTGCTCGGCCACATGGTTGGCTGTTGCTCGGGATTTCTTCTGGTTCTGGT  
TTTGATTTCCCATAAATTCAGCGCGCTGGAGAGAAGGTGAACAAATCAACATTAATGTTACTACACTATATTATTC  
TGCAAAGAGAAATAACGTTCAATAATGACGGCAAAACGTGTGTCTACAACC

>Sequ28666EST2

TTTTTTTTTTGGTTTTTCTACTGCTCAGCTTTATTTTCCAGAGAATATTACATTGAACCTGCCTCCAAAACACAGTTGTT  
TAAATACAGTCTCTTATTTACAGTGTGTGGACGTGTACGCGCGCTGTGACTTGTCTGCGCTGGTCCGCTGACTGACC  
TTCGACAGATCCCCGAAAGATGCTGTGGCCGAGCCTCGCTTCCGCGGGTCTGGACTGTGACTCGTGAGGCTTCCAGCCA  
ATCATGTAGAGGATCTCGAAGGTGGCGGGAACGGACCCGCTCCTCGTACCATAACATCTCTTTATAAATGGCTGCTGCT  
GCCAACACGCTGTCTGTGTCAGCAGCGACCTCCTGTTCCACGCACAGTTGCTCTCGCCCATTCCTTGTAAAGTCAGTC  
ATGACCTCGATGATTCCTGGATATTGAACCTGAACCTTCAATATCCACAGTGAGCATGTTGAAGCCCGCTGGCCC  
AGCAGTTGCCAGGTCCGTGACGGCGGTGTAGGGGGAGACGTTGGGGGAGAATCCCCCTCCTCTCAGTCTCGGC  
GAGCTGGAGGGAACACCTGAGCTCGTAGAGCTCTCCCCGCCACCATCGCCCCGATGAAGACCCCTGCTCCGCTTCCAG  
CACCTGGTGGATCTGTTTTGAGAGCACCTGGCAGGTGCTTGTATCCAGTGCAGGCTCAGGCTGCTCACCACCAGGTGCA  
AGGTGTTTTCTTTAAACGGCAGAACTCCTCATCAGCCAGGACGCAGGTGGTGGGATCTCCGCTCCGTCTGCTCTGCT  
TCAGAGTCTTCTGAGACGTCGGTGAGGAACAGACGCTCCACGACGCTTTGTTTTAAATGCTCTGCAATGTGACTTT  
TTCCACCGCCGATGTCCAACGCGAGGGGAAACCTGCTCGCAATGTCTATAGACCCGATCAGCCACTCGACTGCCACCT  
CGTCCCTCAGTGTGCTGTTGACCGTCTGTCAGCAGCAGCGCCAGTTCTTCTGCTCTTCTCATCTCCCTGT  
TGAACACATTCATGGGCCCCCTGCCCTCACTGCCAGTCTCTGCTGGGGGGCTCAGACCTCGGGCCAGCCCGGAGTC  
TGCAGGAGGGGGACGAGATCCGGCTCCAGCTGCCCGAGGGGGCCGAGCAGGAGCGGATCCGGGTGTGTGCAGCCTCT  
GCAGGACTCTCCACACACTCTGCTGCTCATGGTGTGTTCCGAGCTCCAGGTCAGAACTACAGACGGAGACACTCTC  
GCATCAGAGCACTGAACAACATCCGAGGTGACTTCTCCTGTCTCCACACGTCCTCCATCGTACTCTGTCTGACTAC  
CAC

>Sequ28722EST2



GGGAGAGCTTCTGCAGCAGAGGTTGAGTTTTTTTACAGTTTACTTAGCTAAACTTAACTTTAAGTTTTACATCTTACA  
CAACCAACGTCACATCGTCCACTGACACATATGGATTAAGAGACTTCATTTGAGCCTTTTTTTTTTTGTTTTACTGA  
TCATAAAGAAAAGAACTTTAGTTCTAGTTATGCGTCATCGTGAACACTCATCTCTGTGTGGCGACTAAAATTTGCACA  
TTTACAAAATACGAGATTACAACATGGGTAAAAAAGAAAAAATGTTTTAAATGATATCAGGAAGACATTTAGTTTTT  
CGTTTTAAACAACACAGTCCAAGTAGCAGCTGTGAACAACAACAAACTATCATTCCAATACACGAGGCGGGATCGAG  
GCTGTGTGGATTATATTTGGCTGTACAGAAGAGTGGTCACATACTTCTTTTTGTATCGGTGTGTGCACTGAGAACCA  
TCACCCCGTCTTGTATGGAGAGGGCGTACAGGTGATTAAGCATCACATGGTTAGGCTCCGGAAGTAGCGTCCGGGTCAC  
AAGAGACACCTGTGTCTTGTGAGCAGCACTTGCAGCAGGTGGGGAGGTAAGATAGGAGGGTGTGATCTTGTCTT  
CTGATCTGGTCACATACGCGTCTGTGATAGGGGCGGGTGGGGAACGGACAAGTCTGAGATATCTGCAGAATCTT  
GCGAGTCAATTTGAGGGCGTCAAAGACTTCAAAGTCAGTCGTTTTTACCTGGATAATGTTATTGACTGTTCCGGTTTT  
TAGACGTCATCACAGCCCCAGTCCGATCCAGAGTCCACTGACCGTCCACACAGAACTTGTACTGGTGTCTCCCTCCG  
GCAGGTCCACTATAGCCACAAAGTTCTTCTGACTTCTGTTGAGCGGGATCTTTGTGGCCAGTTGTTAAAGGAGCCGG  
ACACGAAGACTTCTTTGGCGGCCCCCTGACCATCTGAACACGGTTGGCCTGGCCTGAGTTGGACTCTTGCTGTCACTCT  
CCAGGTCTGTGCCAGGCCAGAACTCCTGTATTTCTGCGGAGCCTTTTGAATCGTCTCTCTGGAAAAGATCGGCGT  
CCTCTGTGCTGTCCATCAGGATGTTGGGACGAGCCTCTTCCCTCCCTGCTGTCCATCCCTGTATGACCTCTCACCT  
GACCCCGCTGGATCTGTCTGCTGCTGTTCCCATCCCTGGAGGCATCAACCACTGTTTCTGTCTTTAGGCTCCTGT  
TGTCAGCCGCGCTGCGTTTTTCGCCATTTAGTGAAACTTCAGTCTG

>Sequ28786SNP2

ATACATCAACCATAAAAATGGATTTATTTTTACCAGAGGTCCAAACATATTTCTGTGTTGCCCGAGGATGCATAGAAGAT  
GTCATTTGTGTCATAGGAATTCAACTTCCACTACTACAAACCAGAGTTTACAATCTATATCTTTTGTGTTGACCATT  
GGTTTTGACAATAAAGCCATGTGTAGCTGTTATGTTACACAATATCAAAGTGTGTAACGGGACAATCTTACAATCTGT  
AAAGGAAAAAAGAAAGGAGAAAAAAGGCAGCTTAAAAAATAAATCCATCTTGATTTGAACAAAGGGAAGAGTGTGT  
TAGTGGAGGTCGATAAAGGAGAGTAAGGCTACTGGTATAGGTTGGTTTTGGAGAAAAAACCCTCAGTGTGTTTGTGA  
TACTGTTTTCACTTGTCTCTCCAAGAATAGTATGGGAGAGAAAAGGAAACTTACAAAACCACACTATTGTCTGTACTT  
CTAATTTAATAAGACAAGTATTCCTAATGTGGTTATGGTTTTGTGCTGCTGAGGCAGAAAACAACTGGGAATCTGCCGC  
TGGTCTAGCGAGGCTCCAGCATCTGATAGTAAACGTAGCTAAGAGGCCAAATGAAGGTCAATAGAAAAGGAAAATGG  
GGACCAAGTTAATGAAAAATAGAGCCAGGTTTGTAGTGCATCTCTGCAACCCCAACTGCTCGTCAGAAAAGCTGGACTGC  
TGCTGTGTTTTTGGGTTAAACCATCTCCTGCTGTGTCAGGTAACACGTCACCCCATCAACAACCGCAATCCAACAGCATCT  
GCAGCTTACAGAACTCTGAGAGAACTCTGCTCCATTTTGAAGTA

>Sequ28807SNP2

ACATGTAACAAAAGTTGTTTTTATAATCCATCAAATTTTATTGTAATCGTCTAGTTTTATGACAGGATGCTCGTGTATGA  
AACTAGTAGTCAATGTTTTGTGCTAGCAGTACTTTCTGCTAGAAAACCTTGGAAATTTTAAATGTAATACAAAAGAAATG  
GAGATTTCTGACAGGATTAAGCTTAAATGTAATGTAATAGAGACTGGAGCTACAGTGGGAGAAAAAATAAACACCT  
AAAAACAGCAAAGGCCTGTAGCAATACTGAATAATTAAGACAAGTCTGTTTTCAAAGTGTGGTATAAGGTGTGTGTCC  
ATGCCTGCTGTGAAGTCATAAGAAGTGTCTTGAATTTGAGGAGTGATACATTCACAGTTATACGCTCAAATATACACA  
TGAACAACACACCATCAAAAATTTGGCATGATAATGTTTGTGTAATCATCCGTCCAGCAGCCTCAGTGTGTTACAGCTC  
GGTAGGCCAGGCATGGGGAACCTGGCCGGCAGAAAGCTTCCACCTCAGCCCTGATCTCCGCCACTCGTCTGTTGAACTT  
CTCTCCCTGCGACGCGCTGAATGAACCTCCTTCAAGTGGCCTTAGGATCCAGGCTCCTCTGCACCTCCAAGGCCAG  
CTGAATACCTCTGTGAATGAACCTCCGCCACCTTCTGAAAGTCACTCCATCAAGCCTCTGGAGGTGAGAGCTGGAGA  
GCCAAACCTTAGACCACTAGGGCGCAAAGCAGCTTATCCCTGGACAGGTGTTCTTATTGCAAGCAATGGCACAGGC  
TTCCAGAACCTTCTCAGCTCGTCCCTCCGTGAGTTCCCTTGTGCGCAGGTCCAGCAGGATCAGATGGTTGTGAGAGCC  
GCCAGTGACGATCTTGTAGTCATGGTCAATAAGGGCACTGGACAGAGCTTTCAGTTAGCAAGAACCTGAATCTGGTA  
GGCCTTGAACCTCCGGTGTGATGGCTTGTGTTGAGAGCGACAGCAACCTGCAATAGCGTGGTTGTGTGGTCCCTCCCTG  
CAGCCAGGAAACACAGCACTGATTGATCAAAGACTCAAAGTTGTACATCGTCTCTTTCCCTTGGCGTCCACACTCCG  
CACACCTTT

>Sequ28865EST2

ATTAGGGAGGTCGGTTTTTTTTTTTTTCTAAAAGTTAGAATGGCTTTATTTGATGTTTTGAAGGCGAGGATGTTTTG  
TACTTGTATCAAAGGATCAACAGTCTTTTTCAAATGAAGGACCTGAGCTTCGGTTATTGGATAGTTACATGGACGTTGG  
AAAAGCTATGGAGCCTTGTGTTTTACACTACATCGCTACACATCTCAAACCTAAGACCAGTAAACATCAGATGGAACC  
ACTCAGTGAATTTACTCTGTCTGTTATGATTCAGATCTTGTGAAAGCAGCCACGTCCACGGACTGAACATACTCCTC  
AAAGGCGGTGATGGCTTCTCCAGGAGATCCGTACCCACTTTTTCGTCTCCACTACACATCCTATCTGGAGCTTCTT  
GATGCCGTAGCCCACTGGGACCAGCTTGGACTGCCCCACAGCAGCCCTCCATGCTGACGCTGCGGACGCACTCCTC  
CAGCTTGGCCATGTCCGTCTCGTCTGCCAGGGCTTGACCTCCAGCAGGATGGAGGACTTGGCGACGAGAGCTGGCTT  
CTTGGACTTCTTGGCGGTGTACTCGGCGAGTCTGCTTCTGATTTCTGCGCCCTCTGCGCTCTCTGCCTCTGCTGCTC  
CGAGCCAAATAGGTGATGTCGTCGTCGCTGGCCTTGTGTTGTTGGAGGCGGACAGGGGCGGCTGGGAGGACAAACTGACT  
CTTGGCTGACGCCAGGCTAGCTCTTTCCCTCTGGAAGGACTTGATGTGCTTGTACCAGCGCAGGAGGTGGCAGAAGGT  
CAGCGACGGAGCAGAAGGGATGGCATCAAACACTGCTATGTCAGCTTGTGATGCTGCAAAGCCCTCCACGTAGCTTTT  
GTCTGCCAGAACTCATCGAGAGCTTTGAGACCGGCTGGCGAGCTCATGTCAACAAACACAGTCTTTGTAGAGGTCGG  
GCGGGAAGCCGGGCTGACAGGAGTTCGCTTAC

>Sequ28896SNP2

TGATGACGACTTCACTATGCACAGACAACAGAGCAGGTTTATACAAAGTGATCTGGACCTGATATATTCACATAGTTT  
ATTAACAATTTCAATGAATGATTTGATTTTCTTTAATTCTGAGAGTTGTTTTCAAAAAAAGTTAATTTCTGGGTAAAA  
TGAACAACAAAGTGGCATCACTCAGTGAGCAGGAATGGAGATGGGAACAAAGTCATAATTTTCTATTATGAACTCCAGC  
TGCAGGTGAACGTGTGTACACAGAGGAAACACGCAGTACAGTATTACCACAGCTCCATCAGAGGTACTTATACACAA  
CTTTCTCGTACAGCTTGGATCTTAACCTTACAGGGACATTTGTAGAGGTGCGACAGTATCGACTCCGTGTAACCTA  
TTAAGAAGTAAAACCTAACAGGAGGGAGTTTCTGTATCATCAGAGCGCACACGATGAGCATGTTGCCGCGCCTTTTTGA

TCACAATCTCATTGGCCAAGCAATTGTGGAAGGTCCCGAACATGAATCTCCTGATGAACACGTCTCTACGGTCCGCT  
CAGCCGCCCTCTCTCTCTTTTTCAGGTTACTGGTATGCTGTGAAAGCCATCCTTTGCGGTGGCCAATGTGATGAGGGT  
GAAGTGTCTGCTCATAGGTCAAAGGTCGGTACCTTTCCCACTCGGATACGAGCTGCTCGATTCTGCAGCACACTG  
CAGTACGTTGGCGCTCTGCTTCCAGAGGAGCTGCACAATGACCCGGCCCTGGGTAAGACACTCAGTAGCCTCACCA  
CACCAGCGTTGCTCAAGGACACCGCCATGTTTTCTGAATGTTTGTAGCGCACTATGCTACAAGAGCTAACGCTAATC  
TCTAATTTGTTTTATTTTCCAGTGCCGTCGTAGTTTTTAAATATAATTAACCTTTTTGAGCATTGCGATGATTTATCA  
CCCACAAAATGACAGAAAGTTTAATTTTTTTCATGAAACTGCGTCTATAAACTGGGACTGTTTGTTCGGTAATG

>Sequ29016EST2

AAGCTGCTGTAATCATGAATGAAAATATAAGAGAATGTCTTTGTGTTAAAGTCTGAATAAACACTTCACGTCTTTCTG  
TCTGCGTCAGTCTGTTGAAGGTCATGAGTCTGATGTTCTGCTCATTAAGGGGAAAACACAGTAAAGTGACACTTACAA  
CAGTTGTCACCGTTTTAATCTGTTGCTATGACGACTCATAAACGACTGGAGCGTTTTCTTCTGACTGATTTCTCT  
GCAGCATCAGTGACATGAAACCTTTCAACAGGATCTGAAGTTTTACCTGATTCGTTAAAAACAAACAGGAAGTTGAT  
CCTGCGTCATCAGGATAAAGTCTCAGTCCGAAGCTACACGAGCTTCTGTTTCTTCCGAGCCTGAAAAGTCTCCGTTTT  
GCTCTTGATGGACTTGACGAGCAGAGACAGGCCGGGTTCCATCGGCTTCCCGCCGAGCGCCAGAGTCATTTTT  
CCGTGTGGCGCCGAGGTCGACTCGGTGCGCCAGCGGCGAGGACGTCGTCCTTCTGCGCCGCTCCTGTTTTCTCTGACT  
GCGCTGCTTCTCGGCCAGGAGGCTCTGAGTGGCTTTAGTCTTCTTGTAGCTGGGGTTCGAGGGGTCCAGGTTGAACAG  
GTGGGAGGTGAACATGGCCTGAAAACGAGGGTCTTGAACGTCCACCTGGAATTCGTCGTCCTCCGACGGCTCCGCCCC  
CTTCTTCAGCAGCTTCTTCTCTTCTTCTGCTCAGGTTCTGCTGCTCCACGATCTGTGCTAGTTAAAGTGTGTTG  
TTTGGCCTCGCCGGCGTCGTCCTCCATCAGCAGCGCCATCTCAGCCTTTTGCCTCTCCAGTTCCTCTTCTCTCAGC  
CGTCCGCTCCTCTTCTCTCTGCTTCTTCTTCTTCTTCTTCTGTTTCTTCTTCTTCTTCTTCTTCTTCTTCTTCT  
GAAGAAGGGTCACTGAGGTCGACGTCGAGGGGAGCTCGTCATCGTTCGAGGTCGTCCTCCTGTTTTCTCTGAGACT  
TCTTCTGCTTCTTCTCTTCTTCTTCTTCTTCTTCTTCTTCTTCTTCTTCTTCTTCTTCTTCTTCTTCTTCTTCT  
CTTACCAGCTGCTCCGTCGTCCTTTCAGCCCTGGCACCAGGTCATCTCCATCTGCATGCTTTTGTCTCTCTGAG  
CTTCTTCTCTCTGCTCTGACAGCTCTCAGCAGCTCTCTGTACTTGGAGATCTGCTCCTCACTCTTCTTCTTCTTCT  
CATCTTCGTCCTTCTCTCTTCTCTCAGGTTTTCTCTCTTCTCTTCTTCTTCTTCTTCTTCTTCTTCTTCTTCT  
GAACGCAACCTCTCCGTCCTCTCTCTCTCTCTCTCTCTCTCTCTCTCTCTCTCTCTCTCTCTCTCTCTCTCTCT  
GTCCTTATTGAACTTCTGTTGAGGGCGGTACCCCGCTCGTTCGTTTCGTCCTCCACGTCAGTGCACCTCCGGATG  
TGGCCGCGGCAGATGAGGTGAAGAGTTTGGGCGTGTACGCCGTGAGGTTACGTCGTCGTCGTCGTCGTCGTCGTC  
CGGAAACGTCATGTCATCAGGAATAACCGGAGGTCATGACGGAGCAGCTGCTCTGTCGTCGTCGTCGTCGTCGTC  
CTCGTAGATCTTGGCGCCGTCGTCGACCGAGTCACACTCCACCACGGCGTAGTAATACTTGAAGCAGCTTGAAGTGGTA  
GTGCGCTTCTTCTCCTGTAAACCTCTCTCTCTCAGTGTCTGTCCTCCGAGTCGTCGCGGACGCGCCCTCAGTCCAT  
CGTCCCTGACTCTCTTCCACTTACGCTCTCTTCTTCTTCTTCTTCTTCTTCTTCTTCTTCTTCTTCTTCTTCTTCT  
TCTTCTTCTTCTTCTTCTTCTTCTTCTTCTTCTTCTTCTTCTTCTTCTTCTTCTTCTTCTTCTTCTTCTTCTTCT  
CAGCCGACAGACACCTCGTCACGTCGCGGCGCTCTTGTACAGTTCCTCCAGTCGTCGTCGTCGTCGTCGTCGTC  
TTTTCTCAAGATGGCGTCCACGTCGTCATCGTCGTCGTCGTCGTCGTCGTCGTCGTCGTCGTCGTCGTCGTCGTC

>Sequ29158EST2

GGACTCTTCAGGAATTGAAGGGGGTCACTGTTACCAAGTGTCTTAGTGCTGCAGCTGAAACTGGGAAAAAGAGATGGCA  
CCTGTCAAGAAGGTATCCTTGAACGGCTGAGCGCTGGAGAGGTGGTGATGCGGATGGAGGTTTTGTGTTTGTCTTA  
GAGAAGAGGGGGTACGTAAGGCTGGGCCATGGACTCCTGAGGCGACTGTCACCCATCCTGAGGCTGTGCGACAGCTG  
CACAGGGAGTTCTGAGGCGAGGATCTAATGTTCATGCAGGCATTCACCTTCTACGCCAGTGATGACAAACTGGAGAAC  
AGGGGTCAGACACTGAGAATCACTGGAGCACAAGTCAACGAGGCAGCCTGTGACCTGGCAAGGGAAGTCGCCAGTGAG  
GGCGACGCTCTGGTAGCTGGTGGAGTGTCTCAGACTCCATCTACCTGAGCTGCAAGAGTGAGACAGAGGTGAAGGCC  
ATCTTCAAGAAGCAGCTGGAAGTGTTCATGAAGAAGATGTGGATTTCTTCTATCGTCGACTTTGAGCAGCTTGGAG  
GAGGCGAGTGGCCGTCGCAAGTGTGAAGACAGCGGAAACCTGTAGCTGCTTCTCTGTCATCGGACAGGAGGGA  
GACATGCATGGCATCTCACCCGAGAGTGTGCTGTGAGGCTGGTGAAGGCTGGTGGCCAGATTGTTGGAGTCAACTGC  
CACTTTGACCTATGACCTGTGTGAAGGTGTTAAGATGATGAAGGAGGAGTGGAGAAGGCTGGGC TCAAGGCTCACT  
ACATGGTGCAGCCCTGGCATAACCACACCCCGACTGCAACTGTCAGGATTCATCGACCTGCCAGAGTTCCTTCTG  
GCCTGGAGCCAGGATCCTGACCCGCTGGGACATGCACAAGTACGCCAGAGAGGCTACAAGGCTGGCATCAGATTCA  
TTGGCGGTGCTGTGGGTTTGAACCTTACACATCAGGCTGTGGCAGAGGAGTGGCCTCTGAGAGAGGGATAATCC  
CTCTGGCTCAGAGAAACATGGAATGTGGGTTCTGTTCTGGATGACAGCACCACAAACCTGGGTGAGAGAGGCCCC  
GTCGTGACTACTGGGAGCAACTCATGCCTGCATCTGGTCTGCCACATGCCCATCTTTTCCACACCAGAAGGCTGGG  
GTGTGACCAAGGGCCACGTCACCTGCTGCAGCACAAAGAGGCCACCAGCACCAGGAGATGAAGCATGTGCTGGAGA  
TGCAGAAGAAGTCAAGACATCAGCATGAGCGAGAAAACCGTTGTCAACAACAGCGGGACAAAGAGGAAGGAGTGAAG  
TCTTTCCAGTTCAGTTTGGAGAGAAAAAGCACTTGTAAACAGCGATGCTCCAGTGTGGAGTATTACTTTGTAACCC  
CAAAACAATAAACCTGACTTTAATAAACTAAAAAACCCTGAAACCT

>Sequ29769EST2

TAAAAAGAACNTAAAAAACAAGCTGTGATGTGAGGACAAGCTCAATGACATGAGGAAGGAGCGGGGTTTCAGGG  
CGGCAGCAGTCTGTTTTAGCCAATCAGGGGGAGGACTGGGGGACAGCTAAACCAAAGAGCTGTCTGTGAGAATGTTG  
CCTAGCAACAGCAGTCTCCAGCCAACTCAGGGGAGGGGTGTGGACTTTGAGCAGGGGAGCAGGTTTTGGGGGGTGGTTA  
AAGGACATCACTCTCAGCCGTGTGGAGCTGCGTGTCTGTCAGAGTCCGTCATGATGCTGTCTGCTTACTGTCTGCT  
CACCTCCGTCGTCGTCCTGTCGAGGATCTCTTATCGATGGCCTTTTGTATCTGGTTGCTCTCTTCTTCTTCTTCT  
CAGATCCATTGCCAGCTGAAGTTCATCAGAGCCAGGTGAGTCTGACCCAGCTTCTTATACACTTTCTTATCAGGAA  
GTAAACCAGAGACTCTTTGGGAACAATCTGTTTTCAACTCCTCCAACCTCTGAAGAGCTGCCTTGTACTTGTCTTGGC  
GAACAGTATAGATGCTCGGTGGAACCTGTCAGAGCGGTTTTTAGGTCGATCCCGATCGCTCTGTTTCAGAGTTTTCTAAG  
CTGCATCAGACTTCTTTCAGCGCATGCTGCACCACTCCGATGTGGCAGAGCAGCACAGAGCTCTGAGGGTTGATGCTCA  
GAGCTTTCTTGAAGTGGATTTCTGCCAAATTTGAACCTTCTCTGTTTGTAGTAAAATCATCCCCAGACCGTACCATGCA  
TTGTAGTGTGCGTTGTTGACTCTGATGGCGTTGCGGAAGCAAGTGTCTGGTCCAGCTCCTCTGTGAGAACAAAC

TCATGACCCAACAGAGTGTACGCATATGCAAAGCCTGGGTCCACCTGGATGGCTCTCTGGAAGAACTTTATGGCAATG  
TCATGCTCCTCTGCAGACTGAAACAGTTTTCTGCTACACACCAGGCCTCAGGACAGTTCTTGTCCATGTGGTCCAGGT  
CTTTGGACAGGGCTGACAGAGCCACGTCTTTCTGCAGGTGCCA

>Sequ30450EST2

ATGGTGTGGTGTATGCCCGATGCCAACAAAGGAGAATACTCTGAACCAGCTCGTGGGTGCAGCGTTTGGGGCAGCTGGAC  
AGCGCTGTATGGCTCTGTCCACAGCCATCCTAGTAGGCGAGGCACGGAGCTGGCTGCCGGAGCTGGTGGAGCGTTCCA  
AGGCTCTGCGCGTGAATGCAGGAGACCAGCCTGGTGCAGATGTGGGGCCTCTGATCTCTCCCCAGGCCAAAGAGAGAG  
TCTGCAGTCTGATCCAGAGTGGCGTGGACGAGGGAGCCAAGCTGCTCCTTGATGGCCGAAATGTTAAAGTTAAGGGTT  
ACGAGAACGGCAACTTTGTGGCTCCCACCATCATTGGCGGTGTCACATCTGAGATGAAGTGCTACACTGAAGAGATCT  
TCGGGCCTGTGTTGGTGTCTCAGAGCAGACACTCTGGATGATGCCATCAGCTTGGTTAACAGGAACCCCTATGGCA  
ACGGTACAGCTATCTTACCACAAATGGCGCCACTGCACGCAAATTCACCTCACGAGGTGGACGTGGGCCAGATTGGAG  
TCAATGTTCCCATCCTGTTCGCTGCCAATGTTCTCCTTTACTGGTTCAAGAGGCTCCTTCAGAGGGGACATGAACT  
TCTATGGAAAACAAGGCATCCAGTTCTACACACAGATCAAACCTGTAACCTCGCAATGGAAAAGCTGAAGATGCCACCT  
TGAAAAGTCTGCTGTTACCATGCCTACTATGGGACGCTAAATACTCCATACAAATGCTACTGTTTCACTGTGATAAAC  
CAGAACACCTTAAATAACCCCTTTTACAATGCACAAAATCGACTAATGTTCACTGTGAATAGTTTCAATAGTTTCA  
TGAATACTAAATACTCCCTTTTGGAAAGATTTTATATTAGATGTGTGTATATATAGATATTCTTATATGTAAACCACT  
GTGGCCAAGATTTCAACAATGCAAAGATCTGTACAGATTAGGCAATGTTTGTACGGATCCAAGTCACTTCTCAAAAT  
ACAATATTGTCAAGGACTTAAAAAAAAAAAAAACCGACCTACCCTAACTA

>Sequ36281SNP3

AGTCATTTAATTCCTCACCTATTTTTGCCTGCATTTATTTAGTTTCATCACCAGTTATGGTCTATGTTTTATTTCTAATT  
ATTAATAAATAAATACTTAGTTGTTGTTAGTAAACGTAGCTAGGAACCTTTTTTTCATTGGTTGATAACTAGGAAGTTATT  
AGAATAATTTTAGGGGCGGAAACTAAAGAGCAGATTCTGTTATCGTTTTTCTCTGGAGCTACTTGAACCTTTTGAAGA  
GGCTCGTTATTTTGGGGTTTTGCTGCCTTTTTTGTCCGCCATGTGTGAAAAGATAACGAAGGTGAACAGCTGGCTCAG  
CGCGGTGTTTTGGGGATCAACCGGTGCCGCAGTTCGAGGTCAACACCAGAACAGTGGACGCTCTGTACCAGCTGGCTCA  
TGCCAGTGAAGCCCGGTGCAGTGCACCGCTCTCCTTATAGAAGACCTCAAGCAGAAAGCATCAGAGTATCAGGCTGA  
TGGTGCACATCTCCAGGATGTCTTCTACAAAAGTGTGGCTGTCTGTCCTGTGCAAGCCTGTGCAAGCCCGCTGCTGACTA  
CCTGTCTGCTTTAGTGGACAACGCTATGGTGTCTGGAGTGAGAGACACATCACTGGGCAGCTTTATGCCAGCAGTGAA  
CAACCTCACCACGAACCTTCTGGAAGCAGAGAAGTCCAACAGAAGACTTGAGAGGGAACCTCAGGGCCCTCAGAAAGAG  
ACTCGGAGCTACTCTGGTGCTGCGGAGCAACTTACAAGAGGATATCAACAAAACCTGTTAAAGCTCAGGCAGTGGAGAG  
CGCTAAAGCGGAGGAGAAAAGTCTCAACATGGATTTTGTGACGGCGAAGGGTAAAGAGCTCAGCAACAGACGGGAGAG  
GGCAGAGGCTCAGCTGTGTCCAGGAACATGGACAAGTCTATCACCACCAGGCTATTGTGCAGCTCTCTGAGGAAGT  
CACTACACTGAAAACAAGAAAATAATCCCCTTGAAAAGAACTGGAGCCTTACATGGACCTGAGCCAAAACCCGCTCTTT  
GCTAAAGTGAAAATAGAAAGAGCAAAAAGAGAAATGGCTGCCCTTGATGCACAGTTTGAAATGAATGTGAATTTCAAG  
TGAAGATGTT

>Sequ36290SNP3

TCTCCAAAAGATGTGAATGGCTTTTTGCTTCCGAAAAATCAAGACTTAGGTCAATACGCGCTGCATGAACAACAAGA  
GGATGGAATTTTTTTCCCACTGCATTGTTTCCAGCGTTTACTTACTGCTCATGTGAGCTGATGCATGTACATGTGTGACA  
CACAGACGTGCACAGCAGGGTGTGTCTTCCCTGTGACTCCTCTGCATTACTCGCTCTAGTCATCGCACAAAGGATTACCA  
TTAAAATGCGTGAAAATTTTCCACCCTTGTGTGACCCACAATGCGGCATCGTGTGTTGTCAGGCTGCCCCATGAG  
AACAGAATGTTTTTTTTTTCTCTTCTCTTTGGGTTGCTATGGGGAAAACATATGAAGCGGTGCTAGTACTTTTTCCC  
ACTCTGTATGCCAGCCTTATAAGTTTTTTTTTTTTTTAGTAGTTTCTCATCTCTGCAGTGAAGCAACTTAAAGTTA  
AGTTTTACAAAAGAGGTGCACTAGCATCCAGGAGCTACCTGACAGCACCCCTCTGACTTCAACAGCTCTCCCTAAG  
TAAGAAGTAAAAAAGAAAAGAACTGGGGACCCATGGCAGAAGGCTATGACTTTGCTGTGTCAGTGGCAA GAAAAGC  
TGGAGCGGAAATTAGGAAAAGCTGGGGAGAGTGAATAAGGGTTCATGACAAAAAGCTCCACTGTAGACCTTGTCAAAA  
GACTGATGAGAGGGTGGAGAAAATCATCATCGGGTCTCTTAAAGAGGAATTCGGAGAAGGCACACACTGCTTCAATTGG  
GGAGGAGTCGGTGGCGAAGGGGGAGCCGTGTGTCTTAAACCGACAAAACCCACGTGGATCATTGACCCGGTGGACGGCAC  
CACAAACTTTGTACCGGATTTCCATTTGTGGCTGTGTCAATTGCTTTTGGCGTCAATAAGGAGTTGGAGTTCGGTGT  
GGTGTACAGCTGCTTGGAAAGACAAGATGTATAAAGCAAGGAAGGGGAAAGGAGCTTCTGCGACAGCAAGCAATTCA  
GGTGTCCGATGTAGCAGAAATCAAGAAGTCCATTATCATTCTGAGCATGGAACCGACAGGACCCGAAAAGTAAC  
CAAGATCTTCTTACCATGCAGAAGATCCTCTGCATCCCCGTGCACGGGCTCCGTGGATCAGGGACAGCTGCCACCAA  
CATGTGTCTGGTGGCGTCCGGGGCAGTGGAGGCCTTCTTTGAGATCGGCATCCACTGCTGGGACATCGCTGCTGGTGC  
GGTGTAGTCAAAGAAGCTGGAGGAATATTACTGGATGTTGATGGCGGACCATTCGATTTGATGTCCCGAAGGATGGT  
TTCAGCAAAACAACGATGTTATTGCTAAGCGCATCATCAAAGAAATGAGGCGTTCCAGTGGTGGAGGGACGATGCTCC  
TGTGCAGAAGAAAATGAGAAATTTCTCAAACGCTGTTTACACTGTGCACAAGTGCAGTCTGCCGCTATTTGTGTCTGAA  
TAAAAGTTACTGTCTGTAACTACCACCTGATAATCTTAAATTTGCATGTGAATGTGTTTTCATTGCTGCACCTTTTTT  
ATTCAAAGGAAAAATTTACAGTCAACTGAAGCGACCTTGAGGTCCAATTTGATGACTCTTCATGTGATTTGTCTGTCA  
AAAAATATTGATTGAAGTGGGGAAAACAGCTGTAATTTTGAACCTCGGCATTTTTGTACATCAACATAATTTGCACAGTT  
TGTCTTTGGTCTGTGGCTGTCCATGTTTTTCACTCGATCTTTCAATACACATCAAATACTCCGCTTGTGAATCCGCT

>Sequ42205SNP3

TGAAAAGACTAATCATTCATCAATGAAAACAGACCTCAGACGTTCTCTGAGTGACACAGGAGTATCATGTGACCAA  
TCTCTATGCTGGCTATGAAAAGGATTCATTCAAGCTAATGGGGACTGTTCTGTGGGAAATATAAATGTATCTGGTTAT  
GTCTTATGGAGCTAGAAGCAGCTAATTACTGGCTTCTTTTCAATTTCCAAGGTTAAGAATGTCGTTAGGCTTTTTGGGTTT  
AGATGAAACAGCTCTCCGGTCAACAAACGAGCACCCTGAACACAGAAACACTGATACCTAAAGGAGCCTGCAGACTGT  
ACACAGACTATAAGTTTACTGCAGGTCACACTGTGCAACATGGGCTAATAAAACATGGCTGCCATGGTCTCCATCAAG  
GCAGAGAAAGATGAGGTTATCCGGCCCTGTCCACCCAGCTGCAGATCCCCAGCCAAAGAGCCTCTTGTATATGGGG  
ATGAAGAGGACAGCTCAAATCTGAGGCTGCTCAGCCGACCTCCACCAAACCCCTAGAGCAACTGGACCAATGTGTGG

CCATCTTGAACAACCTGAGTTGGGGCCTCGTTTCTGAGTGATGCTGAGGTGATGCTGCTGGTCAACTCCAAACACA  
TCCCAGCGTACAACTGGAGGCCACCATGGAGAGGCCACAGAGAGAGGAGTGGCCATCCGGAGACAGATGATCTCTTCGA  
AGTGCCCTTCTCCTTCTGCGCTTTCTCTCTGCCCACACACACTACGACTACTCCAAGGTTATGGGCACCTGCTGTG  
AGAATGTAATTGCTACTGACCCCGTACCAGTGGCGTGGCTGGACCGTGCATCTGGATGGGAAGCATTTCCAGGTT  
CCATGGCAACTACAGAGGGCTGCTTGGTTGCCAGCACCAACCGCGTTGTCGAGCAATTGCTCTGGGAGGTGGAGCCA  
GCAGTCGATTCTGGCTGACAGCATGACTCGAGGACCCGTGGTGGGCTGCCCTCCGCCTGCCAGGCTGCAGAGGTCA  
AGGCTGGCTGGAGAGCACAGACGGTTTTTCATGCCATCAAAGAAGCCTTTGACAACACGAGCAGGTTTCTCGGCTGC  
AGAAGATGCTGGTTGGTCTGGCTGGAAGAAATCTGTACATCCGCTTCCATTTCCAAGACTGGAGATGCCATGGGGATGA  
ATATGATCTCTAAGGGTACAGAGCAGGCTCTGAGCAGACTGCAGCAGAATTTCCAGACCTGCAGGTGGTGGCTGTCA  
GCGGAAACTACTGCACTGACAAGAAACAGCCGCCATCAACTGGATCGAGGGCAGGGCAAGTCTGCCGCTGTGTAAG  
CCACCATCCCCGCTAAAAGTGGTCAGAGAGGTTTTGAAGACGACAACACAAGCTCTGGTGGAGGTGAACATCAGTAAGA  
ACCTGGTGGGCTCCGCCATGGCAGGGAGCATCGGTGGATTCAACGCTCACGCAGCCAACCTGGTGGCTGCCATCTACA  
TCGCTTGTGGACAGATCCAGCCAGTCAGTGGGCAGCAGTAACATGCATCACCTGATGGAGGCATCAGGACCAACAG  
GAGAGGATCTGTACATCAGCTGCACCATGCCTTCTATAGAGCTGGGCACTGTGGGAGGGGGCACCAACCTGCCCCC  
AGCAAGCTGCCTCCAGATGCTGGGTGTGCAGGGAGCCAGTCAGGACTGTCCAGGGGAGAACGCCCCGAGCTGGCCA  
GGTGTGAACACAGAAACACTGATACCTAAAAGGAGCCTGCAGACTGTACACAGACTATAAGTTTACTGCAGGTCAC  
ACATGACACACAACAGGTCCAAGGTGAATCTCCAGGAGACTCCAGGAACCTGCAGCAGGAAAGCGTCTGAGAGCAGT  
GTGGCTCCTGCAGGGGCAGTAACCTCAGGAATCATATGGACAATCTGAAAAAGACTAATCATTCATCAATGAAAAA  
CAGACCTCAGAAGTCTCTGAGTGACACAGGAGTATCATGTGACCAATCTCTATGCTGGCTATGAAAAGGATTCATTC  
AAGCTAATGGGACTGTCTGTGGGAAATATAAATGTATCTGGTTATGTCTTATGGAGCTAGAAGCAGCTAATTAAGT  
GCTTCTTTCATTTCCAAGGTTAAGAATGTCTGTAGGCTTTTGGGTTTCAGATGAAACAGCTCTCCGGTCACCAACAG  
CACCGTGAACACAGAAACACTGATACCTAAAAGGAGCCTGCAGACTGTACACAGACTATAAGTTTACTGCAGGTCAC  
TGTGCAACATGGGCTAATAAACATGGCTACAACATCAAGGCTGATGTATGTGGAATGTAGGATGATTAACCCCTGAA  
TCAGCAGCTATGGCACAAGTCAATAGACAAGATTAATGTTTATATCAGTGAGCGTCATCCATCTGAATCGCTATGGTG  
GTAAACAATGAAGCTTAGCACAAATCGATTAGATTGGATTAATAGTGATTTTTATGTATGGAAAAAAATCCCAAAA  
TAAGCGGAGGAGAACTTGGACCCGGGTGTGGTGGGAAAAAGAGGGCAACCGTAGGACCTAGAGATGGGTTAGGGG  
TTGGTTAGGAGAAGTATTTATAATTTCACTCTATTGGTTGGTTGTAGACGTAGGTCACAGCAGCATCTTTGAAT  
TCTCTCAGTGTGACCTGGACCACGACCAACATATCACCCAAGTTTGTTCACATCATCTTTGGTCTGGGCGGCC  
AAAGTCGCACAGTGTGTGCCTGCCTTAAAAAGTGAAGGTGTCTGTTGAATGTGTGTGAAAACTGAAGATCATTGCTGC  
TCACTACAGATTCTGCATCACTGGACCGACATCAGGAAAGAATAAATACGTGAACGATTATCACTTTAAAACAGACTG  
CAATTCAGAGGCTGAGTTCATCTGCAGGTACAGAACAGGTGAGATAATCTCAGGACTGTGTCTGTACTGCTGATAGGA  
CATAACAACAAATCATTAGGCTGGCCATTTCCAGACTTTCCAGAATGCCACAGCCCAATTTAAATACGCTCATCTTCTG  
TGGCCACCCAAACCTTTAATGACAACAACACTCACGAACTAAGATTAAGTGTTCCTGATACATATTTTTGTTTTA  
TAAACAGAACAATTTCTGCAGGTTAATAATCCATCTATATACACATAACAATTAGTTAAGTAACTAATTAATCACAGT  
GAATTTGTTGAGCCTGTATCCCGGCTGTTTTGACGCTGGATAATAAAACACTTATAAATACAGTTTCAACAATATCCAACA  
TAACATCAGCATGAAGCAAAGAGATAATATGACAGTCACCGCTCCATTTGAACTGTTTTCCACCAATGACAAGATAT  
AAGAAACAGGGCCAGATCAATGATTTACTTCCATAACTTTGTTTTACTTTTTCTTATTTAAATATTGACTCATGGATA  
TTTTATGGGCATTTCAAACCTAATTAACAAATTAATTAAGAAAACAAATTTATTTATTTATTTGATAAATGACCTC  
TGCCACCTGCAGTACTGCTACGACCCAGCTTACAACCTGCATGTGCGTGTGTGTGTGTGTGTGTGTGTGTGTGTGT  
AGATGAAGTACTAAACGCTGCTTGAGTTGCATCTGTAATTCATTAATAATGTCTGCTTCAATCAACACAAGGTTG  
TGTTGTCACTGTGTGTGTGTGTGTGTGTGTGTGTGTGTGTGTGTGTGTGTGTGTGTGTGTGTGTGTGTGTGTGT  
TTCAAGAGTAAATGCTGCAGACGTGTGAAATGAATTCAGTGTGAGTTTTCTGTTGAACCAGCAGACAGCCGG  
AGGTTCTGGATATATTTTGTAATAAACACAAAAGGACTTTA

>Sequ42207SNP3

AATTGCATATGCGTGTGCAGTGTCTGTGTGCGCCGCCACCGTTACGTCATCCATGTTTCGCCGGATGATTGTCCACAAC  
GTGTTGAAGGAAGATTCACGTGTGATATTTTTTGTATCTTCCACCGTACAGCCAGACGTTGGAACAAAAAGTGACAGAT  
TAATCGGGTATCTGTGTAGCTCGGAGTCATGGGTCCGAAGTTGGATCCCACCAACAAGGTGAAGAGAGGGCCAGGGAA  
AAAATCCAGGAAACAACAGGGAGCAGAGACCGAGTTGGCCAAGTTTATAACTGATGAGGAAACTGGACAAAACGCTCT  
CTCAAGTAGAGGCAGGAAAAAGAGCTGCAAAAGAGAGTCCAGAATTTGAAAAAGCCAAAAGATGTAACAGAGGAACAGCC  
CAAGAAAGGATTCATGATGAGAACAGTAAATGGTTGAAACCAGCAAAAGAGGAAGCGCAAAATGAATGAGCCTGAAAG  
TGAGGATGACAGTAAAGAGCAGTGGGAGGAAGAGGAGGATGAGGAGGAGGAACAGGAGCTGCAGAGCAGCAGAAAGG  
AGGAAAAGACCAAGGAAAAGAGGTTGCAAAATCAGGAGTGAACAGGTTGAGGAGGAGGAGGATGATGATGATGATGA  
CGGTGATGGTGTGATGATGACGACGACGATGATGATGATGATGAGGAAGAAATGGTTGATGACTACGGCACACTTGATGA  
TGGCAGTGCAGATGAAGCAGCAGAAGAAGAAAGTGAAGGAGAGGAACTCCTTCTTATTGAGCGAGCAGCAAGAAAGA  
GAAAAGCTGAAAGAAAACCATGGCTCTAGGGAGTGTGACGATGACGATGATGAGGAGGAAGACGACGAAGGTGATGA  
TGATGAAGAGAAAATCAGATGCTGACATGGAGGAAGAACACAGTACAAAACAATAGATGAAATGGACATATTTAG  
GCTACCTGGGGCAGAGGAGACTGAGAAGGAAGGTGTCTGCCTTAGACCTGAAGACAATTTATCAGAGGATAAAGGA  
CAATATTGATGTCTTTGTAATTTCTCAACAAAAAGGGAGGAGGGCAAAGAGAGAGCAGAGTATATCTCGCTCCTGAA  
GAAAGATCTCTGCACCTACTACAGCTACAACAACCTTCCCTCATTTGAGAAATTAATAGACCTCTTCCCTCTCTCAGAGCT  
GGTTGATTTCTTGGAGCCAATGAAATTCAGAGACCTGTTACTATTCCGACCAACACACTTAAAACGAGGAGGCGGGA  
CCTTGCACAGGCCCCATCAACAGAGGAGTGAACCTTGATCCACTGGGAAAAATGGTCTAAAAGTGGGTTTGGTGTATCTA  
TGACTCCTCAGTACTGTAGGTGCAACTCCAGAGTACCTGGCTGGTATTACATGCTGCAAGGAGCCTCCAGTTTCT  
GCCCGTCAATGGCGCTTCTCCACAGGAGGAGGTTAGTGTGGATGAGCTCAGCTCAGCTCCAGGAGGCAAGACCTCCTA  
TATTGCTCAGCTGATGAGAAAACAGGCACGATCGTGGCTAATGACGCTAACGCTGAAAAGATTGAAGAGTGTGGTGGG  
AAACATCCACCGTCTGGGCGTCACCAACACTGTGGTCTGCAACTACGATGGCAGGCAGTTCCCAAAGGTAATGGGTGG  
GTTTGTAGAGTACTGCTTGTATGCTCCATGCTCAGGCACAGGAGTCATCGCTAAAGATCCAGCTGTGAAGACCAGCAA  
GGACGAGGCAGACATCCAGCGCTCTGCTCACCTGCAGAAAGAGCTGATTCATCTGCCATAGACTCTGTCAATGCTGA  
GTCACCTTCAAGGAGATATCTGGTCTACTGCACATGTTCAATAATGATGGAGGAGAATGAATGGTGGTGGACTATGC  
CTTAAAGAAAAGGAACGCTCAAATTAGTTCCACAGGACTGTACTTTGGCAAGGAAGGCTTCCAGGTTCAAAGAACC

CAGGTTCCATCCTTCTCTGCGACTCACTCGGCGATTTTACCCTCATTCCCACAATATGGATGGGTTTTTTGTGGCCAA  
ACTGAAGAAGTTCTCCAATGTAATTCCAACCCGACCAGCAGGGAAAGAAGAAGAGAATTTCTGAAGCTCCTGAAGCTGT  
GGAGTTCGTTGCAGAAATCTCCTCAGGAGAAACCGTCCAAAAGTGACAAGACGAACAAGACCGTCCCCGGTAAGGCAGG  
CAGCTCAAAGAAAAGCCAAACCAATGGAACAGCAGCCAAAGGAAAAAGCAACATCAAGTCAAAGGCCAAAAGAAC  
TTACCCACTGGACAAAAAGGCAAAGATCGCCAAGATGGATGGAAGACTGTGAAAGGGGCGGAGGCCAAGAAGCCCG  
CAGTGAAGACGACTGAGGAGACTAAAGCATCAAAGGCTGGCAAAAAGGAGGGAGCAGATTTGAGAAAAAGCAGGCCAA  
AAAGATAAAATCACCATGAAGGCCAAGAACAGAATTGGAAAGAATAAAATTCAGAAAGTTGAAGCACATGCTGCAACA  
ACAAGACACAGAGTGACATTTGTACACAGTTTTAAATGTACTAGGTAATGTAAGAGCTTTGTAGAATTCATTACAGAC  
CCAAATCCTCATCCCTTCAGTCGAAGTTGGTGTGCTGTGTTCTTTCAGAGCAACAATACTGTATGTGTCAAATATGAT  
TGTAACACGGCCATGTACAGGTGGATTGGACTGGTCAATGATGTTTACATTTAAGTTTAGTCCCTCCCTTTTGTATTG  
TATTACAGAATATTCATTGTGTTTGTGATGATTTAATTGCAGGTTGGGACAACTTTAAGAAATCTGTGAGACAATT

>Sequ42422SNP3

TAAACACAGACCTTATCCAGGGAAGTTCTCTGCTGACCTCCTCAAATCACTCCACACTGGGAGTTTCACTGGCCAGC  
GTTTGATCATCTCGCCTCTTGTGTTTTCTGGAGAAATGTTGGAAAAGATCATTTTCTGCTTTGTTTGTGCTGCGTTG  
GCAGAACAGCTCTGTGCTCCAGATGCTTCAGATGGATACCAAGTTTCGACTCAGCATCAGGACTGCTCTGGGAGATCAA  
GCTTACGTCTGGAATGAAAATGAAATGTTCTTTTTCCGAGCGACTCTGGCTTTTGCATGAGGAATCACATGAGCGGG  
GAGGAGTTTGGAGTGTCAAACATCATTGTGTGCAATGAGACTCCCAGAGTGTCTTCTGGTTTGTGGTGACGTTTCT  
CTGAACCTTTCACGCTTGTGATAAAGAAGCTGTGGAGGAGGCCATCAGGAATTTCCCGGGTTCGGATCAACAGTGCC  
TTCTGCTGACTGATAAAACCTGGAGTTTATCGGCATCCTCCACCCTGGCAGCACCAGTCAACCCTGACACCCCT  
CCATGGCTCATTTGTGTTTGGGGTGGTCAATGGGTCTCGTGGGTGCTGGCATCATTTGTCTGCTTGTGCTCTCTGTTG  
AAGAAACGCAAAAGGGGAGAAGCAAAACCGCGCGATGACATCGAAGAAGAAACACGGGTGAAACCGGTGAAAAATGGC  
GGCACAATGAGGGAGTTTACAACATGTCAATTTCTCAGATGATGAGCGATTAACGCAGATGTAAAACAAAAAATCTTCC  
ATGTAACAATAAGATGGGGAAAAAGTTATTGATGCTGCTGTGCTGCACGTGAAAAATCGGATCTTTTTGAAGATTAT  
AGATTTATAGTTTTGTGATTATAGATGTTTCTCATTTAAATGATTCAAATTTTTTTTAAATCTATATATTTGTACTGC  
GTCATACAAAGAAAACAAGCAGTGCACAGTGTGTTTTCAATTTCCACATGAATGTAACCTTTTTTGTGTCGATGGATCAA  
CATCTGTGCAGCAGTCTATCTGTGATCTGCTCTTTGGAAGAACAATACTCTCTATACGGATCATATTTACCATTGT  
ACCATATACTTATTTTTTTGGCAAAACAGAATGAGATGGAACAAGAAATGAAACTGGTCTCATTTAAGATTTTAAGAC  
AGATGCTAATCATGTGTGTGTAGTGCTGGAATTTATGAAAAAAACTGAAATCTTGATGTTTGTAAAGACATTGATACA  
CAGTATATATGTATATCTAGATGTATATCTATATTTTTCTAATTGGAGACAGTTGAAGGCATTGACTAGTTGCTTAT  
TATATTTAACCACATTTTTTGTCTAAATGTACTTGATCCTTTTGCTTTACATTTGTTTGTGTCATCATCTGTCTTTTAGCA  
GACTGGAGTGACAGTGAACCCCCCCCCCTGAACTTAGCGATTGGGTTTAGCTGCAGTATTTCAAGCAGTGTCTCGAGCTCA  
TTATCACCATGGTTGGCAAAAATGTTACTAGACACAATTTACATCACTGTGCATGACAGTCAGAGCAGAGCAGCATCTT  
TGTACGTCGTGCTCTGTGTTGTTTAAATCGAGTCCCTGACAGTGTGCTGTGGTGTGAAAGTGAAGGCCTCTGTAC  
TATTACGCTGCAGTGAAACATACAGCTTCACTTCTCACTTCTAGGCCACTGAAACACGCTTAGAAACACGATGTCTTTC  
ATTGTTCCAGATGAAACATGCTCACATGATCTGTGTTTCCAGCAACTAAAAGTTTGTGAGTTTCAAACCTGACTTTACTG  
CCTCCGCTGGACACTTTGGGGAAAGGATAGGTTTCAATATCTTTTTCTTTTT

>Sequ42551SNP3

GGTACGAAGAGCACGCCCTAGTGACACAATGGAGAGAAGAGCCAATAGGAGACGATTGAACTTAGAGTAACACGTCAT  
TCTAGTAAAGTGCAGAAGCCGGCTGATAGGGAGCGATCCCCTCAACGTCGCTTTCTGTGCCCTGAACACCCGTTGG  
CTTATTACCTCAAATGCTGTAACCTTTTTGAATACAAAGTACTCTTGTGTAACCTGAGGCGAACCTGACATAAAA  
GCTTGGTGATGGCGACCTACCAAGAGTTCATCCAACAGAACGAAGACAGGGATGGGGTGAAGTTTCAGCTGGAACCTGT  
GGCCTTCCAGCCGCTCGGAAGCCACCAGGCTCGTGGTCCCCGTCTTTCGCTCTTTCACACCCATCAAGGAGAGGCCTG  
ACCTCCGCGGGTCCAATACGAACAGTTCCTGTGACGCGCCCACTGCAAGGCGGTGCTTAATCCACTATGTCAAG  
TCGACTTTCAGAGCAAAAATATGGGCATGCAACTTTTTGCTTTTCAGAGAAACCCATTCCCTCCCTCTTACGACAGCAT  
CTGAAGTGAACAGCCAGCTGAACTCATGCCACAGTTTTCTACTATTGAGTACATAGTACAGCGTGGACCTTTCAGCTC  
CTCTGATCTTCTCTACGTGGTGGACACATGTTTGGAAAGAGGAGGACCTTTCAGGCTCTCAAGGAGTCCCTGCAGATGT  
CCCTGAGCCTGTGCCACCAACGCCCTGGTGGGTCTAATCACATTCGGACGCATGGTTTCAGGTTTCACGAGCTCAGT  
GTGAGGGGATGCGCAAGAGCTACGTGTTTCAGGGGCACTAAGGCACTGTCTCCAAAACAGATCCAGGAGATGCTGGGT  
TAATGAAACAGCAGCATCCGACAGCAAGTTCGCCCCAATGGCCCTCAGGATCTGACAGCTCCTGACAGTTCTCTC  
AGCCCGTGCACCGATCGATGAATCTGACGGACTTGGTGGTGTGAGCTTCAGAGAGACCCGTGGCCTGTCCCTCAGG  
GCAAACGTCGCTACGCTCCACTGGTGTGGCACTGTCTGTGCTGTTGGTCTGCTGGAGGGTACATTTCCAAAACACAG  
GGGCTCGTGTGATGCTGTTTATCGGAGGGCCCCCACCAGGGCCCTGGTATGTTGGTGGGCGATGAGCTGAAAACCC  
CCATCCGCTCCTGGCATGACATACAGAAGGACAACGCTCGCCACCTGAAGAAAGCCACTAAGTATTATGAAGCCTTGG  
CCAACCGTTACGCTGTAACCGCCACAGTATTGACATCTACGCTGTGCCCTGGACCAGACTGGACTGCTGGAGATGA  
AGTGTCTTATCTAATCTCACCGGGGCCACATTTGTGATGGGAGATTCCTCAATACCTCCCTGTTCAAGCAAACTTCC  
AGAGAGTCTTTTAGTAAAGACTACAATGGAGACTTCCGCATGGCCTTTGGAGGTGTCTTGGAAAGTCAAGACATCAAGGG  
AGCTAAAGGTTTTCGGGGCCATTGGACCGTGTGTTTTCGCTCAACTCCAAGGGTTCCTGCGTTTTCAGAGAATGAGATGG  
GTATCGGTGGCACCACCCAGTGGAAAGTGTGCAGTCTCAACCCCTCCACCCTTGGGCATGTTTTTTGAAGTGGTGA  
ATCAGCACAAATGACCAGTCCCACAGGGTGGCCGAGGGGCAATCCAGTTTGTAAACCAGTACCAGCACTCCAACACAC  
AGAGGAGGATACGGGTCAACAACATAGCCAGGAATGGGCAGATGCGCAGTCCCAGATTCAGCACATCGAGTCTGTCAT  
TCGAAAGAAGCGGCTGCCGTGCTCATGGCTCGTCTGGGAGTCTTCAGAGCCGAATCAGAGAGGGACCCGATGCTC  
TGCCTTGGCTCGACAGGCTCATCCGCTGTGTCAAAGTTTGGCCAGTTCAATAAAGATGATCCTTTCATCCTTCA  
AACTGTCAGAGTCTCTGTCCTGTACCCACAGTTTTATGTTCCACCTGCGGCGGTGCGCCTTCTGACGGTGTTCACA  
ACAGCCCAGATGAGTCTGCTATTACAGGCACCCTTTCGTCAGGCAGGACCTCACCCAGTCCCTGATCATGGTCCAGC  
CCATCCTTACTCATATTCCTTCCATGGACCACCAGAGCCTGTGCTCCTGGACAGCAGCAGTATCCTGCCAGATCGAA  
TCCTGCTGATGGACACCTTCTTCCAGCTGGTCACTTACCATGGAGAGACCATAGCCAGTGGCGAAAGGCAGGCTACAC  
AGGAGATGGCAGAGTATGAGAATTCAAACAGCTGCTGAGGCTCCTTTGGACGACGCCACAGGAGATCCTTTCAGACAC  
GCTTCCCATGCCACGCTACATCGACACAGAGCACGGAGGCTCACAGGCTCGCTTCCCTCCTCTCCAAGGTCAACCCAT

CACAGACCCACAACCTCTACGCCTGGGGACAGGAGACAGGAGCCCGATCCTTACTGATGACGTCAGCCTGCAGG  
TCTTTATGGACCACTTGAAGAAACTGGCAGTTTTCCAGCTCTGCATAGATGTCCTATTTTACCACAACGAAAGGAGTG  
ATATGACATTCCTGTCTTGACATTTGGGATCCATTAACATTTCCCTGTTTTTGTAAAGGAGCCAAACCCAGAGAGTCT  
ACTGTATGTGCTTGTCTGATTTTTATACAGTGCTCTTTTCATATGTGACATTTCCATGACGTAAAAGGAGCAGAAAAAG  
GGAGAGAATATCACATTCCTAATAAGAAAAACAAGTGTCACTTCCACTCGTGTCTTTAACCTGTTATTTATAAGAAGT  
GGCTCCAATACTCTGGAACCAGACTGTCTCATGAAAGCAATATCATCTCTATTTTACTATGTATTTGATATCACCT  
CTGACTTGCAGATGATTAGACTAATAATTTAATTTGTTTTCTTTTTGTTTGTATCCTAAAATGTGTATCTACTGCA  
TCAGACTTGGTTGAAGGTGCTGTTTAATAGGACACTTACACGTATTTGCTTTGTCTATAGCTAAAAGATGACATGTCTA  
GACTTTTTCTCGTAAATAAATATAATAGTGGACCTCCTAATGCTGGTTGAGAAATGTTACACACACAGGGCTTATCGA  
TCTTCACACTGTATGCTTTGTTAATCACAGTTTGACAAAAAATCCTTCATGGATTATAAGTTAAGTGTTCCTCAAGAA  
AATTCCTCTGAATAATGAGGATTAATGTTCTGAAGAATGGAAGTCAATCACATCAACTCAACTGAGACTGACACTGA  
TTTCGATGACGAACATTTGACATTTATTTTTAACCTAACTTCACAGGGCGGTCTATAGTTTAGTCCACTGATCCCGTC  
TTGTTACCATCTGTTATTTTGCACCTGATGACTGCCAAGTGTCTTTGTAATCAAACCTTTAATATACTGTGCTACT

>Sequ42615SNP3

GAGACGACAGGGGATGAGGGGAGAGGCTTCAGGCTGCAGCCTTACCCAACCTCAAATAACCGAGTGCTCCATCTTACC  
AGCGTAGGCGATCTTCGGCGGAGCTAGCCGGCTAACAGCTAACGCGTAGAGACGCCATTAGTTGGGTGAAAACAGGC  
GTTCCGATCAGGTTGAAAGGGGATTTATTTCCACAGTTTAGACCCATTTGTCTCACATCTGTTGGTGCATATTCATAAA  
CGTCCGATTCCTGATGCTGTGAGGTTGTTTTCTACTGATTTTTAGCTGTTTTTAAAGTCGGAAGCCGATGTGAGC  
TACGCAGGACTTCAGTTCGACGGGGGTTAGCATTAGCAGGGCTAGCTTGACATCGCTTGTTTTTGATAAACGCTGATA  
AATTAGTTAATAAATAACTTCCAGCCATGGCGGCGGAGGGGCGGGCCAAACAGCGCAAGACCTACTCTTCAAGGT  
GGTGTCTGGGGGAAAGGCTGCGTGGGGAAGACGCTGCTGGTGTCTCCGATCTGCGAAAACAATACTCAACGACAAA  
CATCACAACCTCACAGGCGTCTTCCCTCACAAAAGAAGCTCAACATCACGGGAAAGAGAGTGAACCTGGCCATATGGGA  
CACAGCAGGTCAGGAGCGTTTCCACGCGTTAGGTCCCATCTACTACAGAGACTCCAATGGAGCCGCTACTAGTGTACGA  
CATCACAGACGAAGACTCCTTCCAGAAGGTGAAGAAGTGGGTGAAGGAGTTGAGGAAAATGTTGGGCAACGAGATTTG  
TTTATGTATAGTAGGTAATAAGATTGATTTGGACAAAGACAGACATGTTTCAGTGGAAAGAGGCTGAGAGTTACGCGGA  
GTCGGTGGGAGCCAAACACTACCACACATCAGCCAAGTTAAACAAGGCATCGAGGAGCTCTTCTGGATCTCTGTAA  
AAGGATGATGGAGACGGCTCAGGCCGAGGAGAGGTTGAAGGGCAACGGAGCCAGCCAATCAGCTTCGAGTAGGCGGGG  
CGTACAGATCGTCGACGACGAACCACAGGCCACACCTGCCGGAGGATGCTGCTCTTCTGGCTAACACACACACACACA  
CACTTTTACACAAACACACACACACACACACTCTCTGTCTATACATGCTTGCAGACATTATACTCACACAC  
ACATTTATCAGTGTCTGTGCTCCGGTTGGTCCGCTCTGAAATAATCTGCTGTGTTTTCATTTCAGCAACGCCTCTGCCG  
CTAAGGAGCATGGGAAATCATATTTAAATGACTTTGTTTTCAGTGTACCCCTTCAAAGTAAAAGTAACTGAAGTCTCAT  
GATTGAAATCAGTGTCTTTAGTTACAAAATTCAAAAAAAATCAGTTTTTAGCACTTTATTTACTGTCAATTTCTTAT  
AAAAACAGACGATAACTCGACAGTAATCCGAAAACAAGCAGCGCAATAATACAGAAAACATTTGAAGCCCTCTCCCT  
CCCTCCTCCAGCTGCCTCCGTGTGTTTCTACTAAAAAATTAATAAAAACAGTAAAAATAAGTTTGAAGACACAAA  
AAAGCGGCTCAAGCTTCAGCAGAGATTTGTTTAGTTTTGTTTTTGGGGGTGGAGGGCTCTTAAATGGTTAAACAT  
GCAATCCGCACACAAAAGACACACTGTACAAACCGCCATTAATCTTCATGTTGATCAGTTTGTGGTGAACAGCGTC  
GCCTGTGGACGAAAGTGAAGTGCAGGGAGACGATGAAAGTTAAATCCCGCCGCGGAGTTCTTCACAGGTCCGGAC  
GACTGAATCTCTCTGCTTCTTATTATTATTCATTCATCATATTTACTGTTGCTGCAGTGAATCCTCCAGCTCATGTTTT  
CTCATGTTGCATTTAGTCCAAAATCTTTCCCCCGAATTTTCATGATTGAACACTGGTGTCTGATCAATACATACATCCC  
ATAAAAACCTTAAACATCCCTTACAGTCAAACATGGAGGTGCAGACGTTCCGACCTGTGAGGAACCAGCAGCAGCTAC  
AAACAGACTCCAGGTCGATGCACAAACATCATCAGATAAAAGCTGCAGTCACTTGTCTACAAAACAACATAAATAA  
AATCATTCTTCTCATTTGTTGAAGCCAAATGTAATAAAAAAAAAAAGCTGATTTAATAAATAAATAAACAACATTT  
TGCAACAACCAGAAAAGAAAACCTTAAACTCTAAAATGAGAAAAATAAAAAATTTACAGTTATAAATAAATAAATAA  
AAGAAAAGAAAACAATGAATCAGTTTGAATAATTCAGCAAAAATCAAGGTAATTAATAAATAAATAAATAAATAA  
TTGTTAATTCATAAATAAGTTAAAAATATCCCAATATTTGGTTTTCTAAATGAAAAATATTGTTAAAAATAAAAAA  
TTGTAGATAAAAAATAAACATGAGCAGCGAATACAAACG

>Sequ42920SNP3

TGTAGACTTTGAGCAGAGTGGGCTGGTTCCGGGGAAACGACGCCTCTTGGTCCGGAACCGCGGATGTTTTCTGCAGCTTAT  
ATAGCAGAGCTGAGCGCACACATCTGGGCGGAAAACCTGAGAGAGCAGCAGTTTACCTTCTTCACATCAACATCT  
GTCTTCTGTCCGACAGGCCCTTTAGCACTTATGGCGTACCACAAAGAGTTCGAGGCTGCAGGGAAGAAGCCCGCCT  
GCAGGTGTGGCGGGTGGAGAAAATTGGATTTGAAACCTGTCCCTCTCAACTCCATGGAAAACCTTCTTACCAGGAGACTC  
TTACATAGTGTCTTACACCACCCCTGCTCCTTCTTACAACATCCACTCGTGGATTGGCAACGAAGCTTCCCAGGATGA  
GAGGGGCGCTGCCGCCATCTTTATGACCCAGCTGGACGATTTCTGCGAGGAGCCCCAAGACAGTTCTCTGAGTATCA  
AAACCAAGAGTCACTACCTTTTCCAGGGCTACTTCCAGGTCCGGCATCAAATACAAGAAAAGGGGGAATAGCTTCCAGGCTT  
CCAGCATGTGGTGACCAACGCGTAAATGTCAAGCGCTGCTGCAGTTAAAGGTCGCCGATGATCAGAGCCACAGAG  
GTGGACTTGTCTTGACCAGCTTCAACAAGGAGACTGCTTCATCATCGACTTGGGAAAGGACATCTACCCTGGTCT  
GGCAGTGAAGCAATCGCTTTGAGCGCCTGAAAACCACTGAGCTGGCCATAGATATCCGTGACAATGAGCGAAAAGGC  
CGTGTGAAGTACACATGATTGAAGAAGGCTCTGAGCCGGAAGATGTCATTAAGTGTCTGGAGCTATGCCAACCTC  
CCACCAGGAAGCTCAGATGATGATCTGTTGATAAGAAGAACAAGGGCCAGGCATCTCTCCATTTGATTTCTGATGCC  
GCTGGCTCCATGAAGACAACATATGGTGGCTGATAAAAACCCCATTTCAAACAAGACATGCTCTCCAGCAGCGACTGTAC  
ATCTTGGCAACCGGAGGAGCAATAAGATATTTGTCTGGAAGGAAAGGATGCAAAATGCTGATGAGCGCAGAGCAGCT  
TTGACTGCTGCAACAAGTTCATTAAGACAAAGAACTACCCAAAAATACTCAGATCCAGGTGATGCCAGCGGGGT  
GAGACCACCTGTTTAAAGCAGTTCTTCTTCAACTGGCTGGACAAGGATGAGACTACAGGCCCAAGCAAGGCCTACACC  
ATCGGTGCGATCGCCAGGTGGAGCAGATTTCCCTTCGATTTCTCCAGCTCCACAGCAACAAGATCATGGCTGCCCG  
CATGGCATGGTGGACGATGGCTCCGGGAAAGTCCAGATTTGGCGTGTGGAAGGAGGTGACAAAGTACCTGTGGACCCA  
TCAACTTATGGACAGTTCTTTGGAGGCGACTGTTACCTGGTGTGTACTCTTACAACACAGGAGGCAGAGAGAAGCAT  
ATCATCTACACTGGCAGGGGCGAAGTGCACCTAAGATGAGCTGACGGCTTCGGCTTTCTCACCGCTCAAGCTGGAC  
GACTCCATGGTGGAGTAGCTACACAGGTTTCGTGTTACTCAGGGCAAGAACCCTCATCTTGTGAGACTGTTCAAG

GACAAACCTTTGGTCATCCACCTGGGTGGGACATGCCGCCATGGCGGTGAGAGCAAGCCTGCCACTACACGGCTCTTC  
CATATCCGCCAGAGCTCCACCAAAGCCACACGGGCTGTAGAGGTGGAGCCCACTGCCTCCTCTCTGAACACTAATGAT  
ATTTTCGTGCTGAAGTCACCCAAGTCCCTGATCCTGTGGATGGGGAAGGGAGCAAAATCCAGGGGAGATGGCAGCAGCT  
AAGCATGTTGCCCGCTGCTTGGAGAACTGCCACTGAGGTGGAGGAGACCAAGGAGCCGGCTGATTTCTGGGCTGCG  
CTTGGTGGGAAGAAGGACTACCAGACCTCCAGGACCCTGCAGAAAACAGTTAGGCCCTCCTCGACTGTTTGGCTGCTCC  
AACAAGACAGGCAGGCTGATAGCAGAGGAGGTGCCAGGTGATTTACACAGATGGATCTGGCAATCGATGATGTCATG  
GTTTTGGACACCTGGGATCAGATCTTCGTTTTGGGTGCGGTGCGGAGGCCAATGAGACTGAGAAAAGTGGATCTCTCAAG  
ATTGCCCAAGACTATGTGAATTTCTGACCCCTCTGGCCGTCGTGGTACCCCATCACCACCATTAAGCAGGGGGAGAGC  
CATTCTCCTTACCAGGCTGGTCCACGCCTGGGACCCCAAGATGTGGGACAAAAGATGTCTGCAGCGCATAACAGGACC  
GTATCAAGAAGCATTAGTAGAAAACCACAAAGCAGTAGCTTCAGCACAAACATCAGGAAAGATTGAATCCTCATGGTGG  
GTTTTGGAATTTCAAAGTTCTGTGTGGGTGGACGGCAGCTTGGAGATACACGGAGCTTTAGAAGATTTGTTCATCCATT  
TTGCAAAACAGGTGTAATTAGCATCTCAAAGGCTGTATTTGAAATTACACGGCAAAGTCTGAAATAACATTACACTG  
TCATATAAGAACACAGACAGGATCTTATTATTGCACCCTCACAGAAATTTTAAATATATTAATTTGAACCTTTGCTGGA  
AAAGTTTCTGGGATTTTTCTTTGAGCTTGTTTTTCATTTCTTTCATGTGCATTAATAAAGGATAAAATGGTAAACTGTTTAC  
GATCCAGTTGAAAAAACCTGATGCATTATGTTTCATATGAGGTGCTGGAAATTTAGACAACACAAATTTCTTGTGAC  
GAAATAATGTATATTTTACTAAATTTGCACCTTTACAGCCTCT

>Sequ42953SNP3

TCGCCCTGCTGTCGGTGCTTGTGAGCAGCGAGCAGCACAGCAGCCACACGGAGCAACTGAGGAACAGACAGAGCGAC  
AGAAACTCAACACGTAGTCCTCCACGCCAGACATCACCAGCCTCCTCGCATCACCCTCCCGGTTTTCAGGTTCCCAACA  
TGGCCGCCACCCCGCGCAGATCTCTCCAGAGGAACCTGGAGGAACCTTAGAGAAGCTTTCGCAAAGATCGATGTGGACA  
ACAATGGATTTCTCAGCAAAGCCGAGCTGACCGAGCTCTTCAGAGCCGCTAACCTGGCGCTGCCCGGATACAGGTTCC  
GAGAGATCGTCCAGGAGCTGACCAAGACCAGCGACCAGCTCTCCTTCGACGAGTTCACTCAGATCGTCCACAGCCTGA  
AGAGCAGCGAGGTGGCGAAGACCTTCAGGAAGGCCATCAACAAGAAGGAGGGAATCTGTAGCGTGGCAGGAACCTCAG  
AGCAGTCCGGCACCAGCAGCTCCTACTCAGAGGAGGAGAAAGTGGCCTTTGTGAATGGATCAATAAAGCTCTGGAGA  
AGGACGGGACTGTAACACGTTCTGCCGATGGATCCCAACAACAACGACCTGTTTACCAGCCATGGGAGACGGGATCG  
TCCTCTGTAAAGATGATCAACCTGTCCGTCCCGACACCCTGCAGCAGAGAACCAATCAACAAGAAGAAGCTCACACCTTT  
CACCATCCAGGAGAACCTGAACCTGGCTCTGAACTCGGCGTCGGCCATCGGCTGCCACGTGGTGAAACATCGGAGCTGA  
GGACCTGAAGGAGGGCAGGCAGCACCTGGTCTGGGTCTGCTGTGGCAGGTCAATCAAGATCGGACTGTTTGGCGACAT  
CGAGCTGAGCAGGAACGAAGCTCTGATCGCTCTGCTGCGTGATGGAGAGAGTCTGGAGGATCTGATGAAACTGTCCCC  
TGAGGAGCTGCTGCTGCGTTGGGCCAACTATCACCCTGGAGCAGGCCGGCTGCGGCAAGATCAACAACCTTCAGCTCCGA  
CATCAAGGACTCGAGGGCGTACTACAACCTCCTGGACCAGGTGGCACCTAAAGGAGACGAGGAGGGAATCCCCCCCGA  
TCGCCATCGACACGTGAGGACTCAGGGAGAAAGAAGACTGAAGCGCGCTGAGTGCATGCTGGACCAGGCCGAGCCGGC  
TCGGCTGCAGACAGTTTCGTATGCGCGCGGACGTCGTCCGGGAAACCCGAAGCTCAACTGGCTTTTGTGGCGAATC  
TGTTCAACAAGTACCAGGCTCTGAAGAAACCAAGAAACCAGGACATCGACTGGAGCTCCATCGAAGGTGAAACCAGGG  
AGGAGCGAACCTTCAGGAACCTGGATGAACTCACTGGGGGTCAACCCCTCGAGTCAACCACCTCTACGTAGACATTGATG  
ACGCCCTGGTGATCTCCAGTTGTACGAGAAGATCAAGGTTCCAGTGGACTGGGACCGAGTCAACAAGCCTCCCTACT  
CCAAACTGGGCAGCAACATGAAGAAGCTGGAGAAGCTGTAACATGCAAGTGGAGCTGGGGAAAGAAGGAGGCCAAGTTCT  
CCCTGGTGGGCTCGCGGCTCAGGACCTGAACGACAGGAACTGAAGCACCCTCACCCTTGCCTGCTGTGGCAGCTCATGA  
GACGGTACACCTGAACATCTGGAGGACCTGGGCGACGGTCCAGGAGTGAAGGAGTACCAGCAGCAGCACCATCGTGTCC  
ATGACGTGCTCACGCAGGCTGGAAAACCCACCATCTCCAGCTTCAAGGACGGGTCAATCGGCAGCAGCATGCCGGTCC  
TGGACCTGATCGATGCCATCCAGCCCGGATCAATCAGATACGACCTGCTGAAGACAGAAGACCTGACTGACGAGGAGA  
AACTCAACAACGCAAAGTACGCCATCTCCATGGCGAGGAAGATAGGCGCCCGGATACGCTCTGCCCGAGGACTTGG  
TGGAGGTCAAACCAAGATGGTGATGACGGTGTTCGCCTGCCTGATGGCGCGGGCATGAAGAGAGCCTAAAGACCAA  
GAGCACACCCCGTCACTAACTGGACGAACATGAACCTGAAGCACCCTCAGGAAAGTGAAGGGGGAGGGGTCAAGTTG  
TATCTTGTGACTTAACATTTAGAGGGAAAAAACTCTGTACAGTCTCACTAACTGAAATATGGAGACGACAAGGTT  
CAAATAATGTGAACCTCATTTCAAATAAGTGGGGTGACAGAAACAAAGTAATATATATATGCAGAAATCCACTGCAG  
ACTGTTATATTTCTCTGTTTTAACTCAGGATCAGCTTCAAGTAAACATCATCATTAATAATAAAGTACATAATC  
ACATCTGCAGGCTTCCACTCTCTGCTGCACTGTTGTTGGTTTTATCTGATGCTGTATCATCATGAAGGACCTGCGTA  
ATGTCCTGTGTATTTCTGTGGCACACATTCAGCCAAGGTCTCACTTTTTTACCTGATTACAAACATTTCAAATAAGA  
AACTTTATGACAAAAATATGCAACGAATAAACGGACTT

>Sequ43398EST3

TTTATTGAATTGAGCAGTTTTTTTTTCTTGTTTTTATTTTGTTTTTTGGATTGTGTGTCGGTCACATTTGCCTTTTGTAT  
TCCAAATATAGTGATTTTGAACCTCTGTCAATGGAGTAACATGTACAACCTGTAATCAAAAAGAACAACAAAAAGAAGC  
TACGATTTGTTACGTGCAATACTTTGTAGAATACTTTTATTTTTCATGCTGTTTTTCCAAAAGGTGGTACTGACCTTTG  
AAGTAAGATGATGATGATTATAATGATGATGATAGCCTGTGAAATCTTGAAGAAGACAATTTGAATCTTTCAGGCT  
CCATTTGAGTGAAGCGCTCTGCAGTGTGGAACATAAACCATAAATGAACCACTATTCCATCAGAGATCGTGTGGTTTTG  
AAATGCACTGAGAATAAAGTATGACGAAACTTTTTGTACATCAAACCTGAACTTCTTAGCAAAAACGCTGTTTTTTTTAA  
AATTTTATTTGTGTGACAGACTGCGAGTTGTAGTGAGTTTATGAGGGGAATGAAACTCAGTAACACTGCCACTCACCC  
CCCTGCCGCCACCCCAACCCCAACCCCAACCCATCTTTCCGAAAAGCACGAAGCCACCAAGCTTACCCTTAAAGCGA  
TATCTGGGAAATCAAACCATTTCTGCTGTTTCTTAATTTGCTTGTAAATGGAACAAAAAAACTTCTCGGCTGCTTTTGG  
GGGGGGCTGCCCTCAGTGACAGCAGCAGTAGATCCAAATAAATCCAGATTACATCATATCAAACCTTATTTATGC  
AATTTTACATTTCTGCTGATCTGAACCCGACTCCACCGAACCTTCCGACCTTAGTGTCTTATCAGACAAACCTGAACC  
ACATCGACACAGGAACAGATTTTAAATTCACGCTGCCGACATTTGTGTTTCAATGTGAAAACGTCACCACATCTGCAGGAA  
TCTGTCTGTTTCTGTGACGTAGATGCAACATTAACCCGACGGCTGACGTCATCTGTGCGGTGCGAAAGGTAGAAAA  
GTAGGGCTCCGTATCCCGCAACATCCTTAACGCAAAGATCATCTTTGTTCTTTAAATTTGAAAAAGATTTTGTCTT  
AAATTTGAATTTTTTGTCAATTTTAACTTTGAGTCAAGATTGATAAAGAATACTTAAACGATGGCGATCTCGGCGC  
TAAGACTTCTGGGAAACGGAGTCTGCTGCTCCTTCCCGCTCCTCTCTGTTCTGAGCATGGTCTCCAATGACAAACGC  
CTCCGCTTTTTCTGCATTAACCTGAATACCAGCCTTCCCTCTTTTTCAGAAATGTACATGGGAAAAATGTTTTTAA

>Sequ43412SNP3

ATATAACCGGTAAGTCATTAGCTCAAGTCGACACACCTGCCTTGAACCTAACGAAAGAAGCACGCGAGGTGCCCGTGAA  
AGCGCTTTGTTGTAATCTCGTCTGGAATGACTCTATTTAAAAGTGTGGATTGTAAACATTGGAAACATGATCGACTT  
TAAATATGCGATGTGGCCTGATGAGAGGTGCATTTTCATTGGTTATTTTCACTCTGATGTTGAGCTCCAAACCCACGGA  
TGCTTTTCCACGCTCTGGACTTGACTTGAGAGGTAGCAGAACCCAGCGGGATGTCCCTGCTCAGCCAGCCTGGAGTA  
TCGGCACGGCAACATCTGCTGTCTAAACTGTCCAGCTGGTACACGTGTGGAAATCACCTGCACCGGAACACGAGAGAA  
GGGGAGGTGTGAAGAATGCGAGCATGGGCACACATACACTGAGCACAGCAATGGGCTGAACATGTGTTTCAA GTGCAC  
ACGGTGTGCTCAGATCAGGAAATGGTAACCGAATGTAATCAAACCTATAACTGAATGTGGTGCATTAACAGGAA  
ATTCGTGCTCCTGACCAGGCATGTGAGGTGTGCAAGAAATGTTCAAGTTGTGAGAAAGATGAAGAGATAGTGAGGAA  
CTGCACCTCTACCATCAACACAGAGTGCAAGAAATCCAGTCCAGCTCTGGCACTTCCCAAGCAAATGCAGCAATAGT  
GGTGCCATTCATACTCTTGGCTAGTGGGCTCATTATCCTGGGAGCAGTTTGTGTTGGAAGAAGAGAAACAAAGCAAC  
AGACTCTCAGAGACCAACGGCAAAGCTGGACAGCGTTATCCTGCTAACTTTCCCACTGAGGAAAGGAAGACCGGAGA  
AACAAAAGCCAGCTGGCAACTGGTGAGACCTAAATCCTCAGCCGGCACGGAGGATGAACGTAAAGTGTGTGCGCA  
AGCCTCAACAGCTCAGCCAGTAACCTCCAGCACAGCCTAACAGCCTGCCCTCCCTCTGCCTTCCCGTACCTCCCCC  
CAAGTCAGTGTCTGGTCCCGGCGAGCCCAACAGGAGGAAGACTGGCAATTTCCCAAACCTAGTTTCTCTGAAAGGT  
GAAGATTCTCTGAGGAAATGCTTTGACTTCTTCAAGAAGAATTGGAGGTGACTACCACAAGAAATTTCTCCGTCAC  
CTTGGGCTTAAACGACAATGTGATCAAAAGCAAAGAGAACCTTCACTATGAAGACAGGGTCCATGAGTTGCTGAACATT  
TGTTGGAGAAAGTGGGCAGAGAAGCTAACTTAAATTACCTGCTGAGGGCATTAATTGATCTGAATCAGAGGCGAACA  
GCTGAGAATATCAGGGACAGAGCTATTGTCAATGATCATTACATCTATGAGAATCAAAATAGAGGTGAACTCCGTCTGA  
AATGATGCATTTTTAATATAGTATTTACGTTGTGAGGTCTTCCATCCGATACTGGTTGGAGTGGCATCGCACAGGGC  
TTACGATCTGTAGTGTCTTTCAGCCAGTCAAAAATTAAGCTATTTTTGCCAAAACGTTTATACTGCAGAGAAAGTGTAGTA  
ATGCTCTCATTAATATCATGTTTGGTGTGAGGTCTAAGCTTGTGTGTTGCCAGCAAGCATCACACGAGGCCGCCACCC  
ATAGTGGTCTGCAGGCTGTGATGAGAGAAAGCATGAGTAATGATGTCTCATGAATCTTATGGCATGAAGTCGTGCTC  
TGTGAAAGCTTCTCCCTGTCCCGTGTGGCCAGTGGAGTAGCAATGCACAAAGCTTCCACCCATAGTGGTGGTATGT  
TGAGTAGTCAATCTATTTCAGCCAAAAAAAAAAAAACGGTGCACAAAGTGGCTATTTTACTGACACTGCCGGTCTGCCG  
ATTCAGTAAGGCATGTTACTACTAACCTGTAGAGAAATGACAGGACTTGTGAGTTAAACAGGCTGAATATCT  
GCCTACTTAAACCATACTAGACTCCAAAATTAACAAGTTGATTGAGTTGTTTTTTTACTGATGACTGAAAATGTTT  
CAGCTCTACACGGAGGGTTGATAAAGTATTTAAATACAAAAGTGTGTTGCTGTCTGTATACTACGTGTACAGACTGC  
TGTTTACTTCCACACATCTCAAGACAAGTTGATTGTTTCTCATAGCGAGTGTCAATAGACCTTATTGATGTCTT  
AATCCTTGAAGATGTGCCTTATTTATGTAATGTCTCAGGAATTAATGTCTATATGGTTGCAGTATTGAGCAACAGA  
ACAGTGAAGCATCATATAAATGTCTAGAGAGCAAAAGTATGTTGAACTATTTATGGTGGAGAGCAGTCAAGTTAATA  
ATTTAATTAAGTACTATGGTCTCTGCCTGACTGTGTCTTTTATACTTGTGATTGACAGTGTAAATGATCGTGGTTCTC  
ATGGATCATGATATTTAATCTTCTGTCCCGTGGTTCCGGTCAAGTTGTTTACACTTTTGTGATGACTGATCACAAC  
GCAACATAAAAATGACAGTAGGTGCTCCTGGGTACCGCTGATGGGATAAATATGGCTTTGCCAAAAGCACCTGAGAG  
AAAGTGAATTTGATCTTAATGAATTATGTGCTGTACAATATGAGGGTCTCTTGCATTGAGCTTTATGGCTCTCAG  
TGGAAGTCGTGTATACATAGAGTCGGTGAATAAAGTTAAAAACCAACATAGGGTGTCTTAGTAAGGTGTTAACCA  
CCAGAACAGCTCAATGTCCCTTAATATCGATTCTACATATTTCTGTAACCTGCTGGAGGATGATCACTATTCTTCAA  
AACATCCCTCACTTGGTGTTTGATGATGGTAGTGGAGTCCAAGTCTCTCATAGGTGTTGAGCTGGGTTGAGATCT  
GGTACTGAAGCCACAGCATATGATTTACGTCATTTTCAAACCTGATTTTTTTTTTTTATCAGGTTTTCTTTGTCA  
CCATCTCTCTTCTGCTTTATACAAGTTTAAATCACAATGTTACATAATGCTTTTCTGTTTTGTTTACATTTGTTGC  
CACTTTTGGAGTCGTGTGTGTGTATATATCTATCTATTTATCTATATATAAATATATATATCAGCCTGTTGCGCT  
GATGTTTTCTTTTACTAATCTGACAACCTACTTGGAGTTTTTTTCATAGTAATTCAGCTTAATTAAGGAC  
T

>Sequ43602SNP3

AGCACCTTTATTTAACATTGCACTCACTTCTAGTCGCCGTGGATACCAACAGCAGCTGGACGACCACAGTGTAGAAAA  
GTACATGCAAAATGTTCTGCAGGATGAAAACATGAAAACACCGTCTCTCCAAACGTCCCGGTCTCTTTAAACGCCGC  
TTCTGTTTCCCTGCATTGTGATCAACAGAAACATCTTCCCTGAGAGGATTCGTCTGACACAAAGACCTGGTCCAGGATCT  
GCTGGTTTACTGAAACAAACTGGTCTTTGGGATCTTTTGGGATCCATTCTAAAAACTTGACTGCTCCATGCTGGAGAG  
TGAGGAGGATTTAAAAAGCCTGCTTAGAAAAATTTTAGTTCTGGAACACTGAGCACACAAACACTGCGGTGTAATTT  
TGAATGTGAAACTTAGTTTGCACAAAAAACTACTTAAGTTACACTGTGTTTTTTTTTTTATAGATGATACCAACACTCT  
TGATGACAACCTGAGCCAACAACCTAATATTTAATGAAGACTGAGATTGTTTGGAAAAGCTCTGGAAAATGTTTGTAAAGT  
GGATGTATTCAACACCCATTTAAGTAAATTTTTGACAAAATGTTTAAATAAAAACATCGGCCATGTCATGATTTATCAT  
TGCGAGTTATTTAACTGAATTTTACAGACTGAATCATCGTTTTGCATATGCACGCTCAGGAGCGAAGTTCAAGTTCT  
GCATTGATTCGTAACAAGAGCTACAGTCGTGTCCATGTCAATATGGATAAATACTTTGTTTCTTTGTGTAATGTGAA  
GGCACCTATGTAGCACATAACTTTTACACACTTAGTCTAGAAGTTACCAAAAAGGCTAATAGCCTGAGGTAGTGAAGA  
CTGATTTTACAGACATCTTCATTTCTTTAATTTAGGATTTGTGTGACTGTGTTCCAGAACCTTCAAGACCTTCAGA  
ACCCTGCAGGCCCTGTGTTCTCGTATCTGGGTTCTAGCAGAGCTCACAGGTCTGGCTGATCTAGAACATTGTGGACT  
TGATGTCTTGGCTGAAGAAAGTTCCAAAGTTCAGGTCTCTGGACATCAGCTCCTCCTCTACGTTCTCCAGTGCCCACT  
TGTGTTCCACGATCTCCAGCGCTCCCACTCGCTCTTAAAAGCCTTGTGGGGTTCAGGGGGCATCGCCATGGCAGC  
CTGTCTATCTGGTCTGCATGATCCGTGACTGGTCAAGCAGCTTGTCTGTCCAGTATGAGGCTGTACATGCTCTCTCA  
GTCCAAACAGCTTGAGGAAGTACCAGGACGCTGAGCTCACCCAGGAAGCATCCAGTGCAGCAGGTGCGATCCCTCGCT  
GTAACATCGCTTGAACCTCAGAGTCAGAGGGAACCGCACCTTGGTTATGACGAATCCAGAGAAAGCCAGTTTATCC  
ATCCACCAATCACAATCATGGGCAGGACGTTGGTCAAGTTTTCCCTTCACTCATGTCCGTCAACATGCTGGTGTCTGTCA  
TGGGTTCTTGGGACGACCTTCTCTTGACCTTCTTGAAGAAGCCAGTTTCTGCGTTGTTGAAATAATGTTTCTCTCA  
TGGCGAAAGACTGTCCGGGAATATACTTTCCATTCTCTGAGGATGCGGCTGCGCAGGAGCACCTGGCTGTGAGAGA  
CCTGCTCCAGGTGACCTTTTTGTGCTGTGGAGCAGCTGGGTGACATAGTGACGGATGATGCCGACAAAGAAGGTGA  
TGAACAATGGGACGACCAACACAGACGAATACTGGAGTCCAACAAGAGCTCTGGACCGCCATCGCTCTCTGT  
CAACCAGCCAATCGAAACAGACGAGGACGCTCACATTTTATGAACTTTTGAGAATCAGCAGCGCACAAACACGTTCC



GCAGTTTAAAAAAGACGAAGAAGAAGCAGCTGTTTTCGCGGTTTCATCGTTAAGTTTACAGTCACGGAGGTTTTTTTATCA  
GGTCTGGACCTGCCGCTGCTGATCCACAGACCAGTTTAGCTCCTGAGCTAACTAACTACACGACTTGGTTCCGGTTCG  
GTTCCGGTTCGGTTCGGTTCAGACAGCAGCTGAACCAGGACCACAGGCTCCGCCACATCTGTGATTATTTTACAGGGC  
TAACGTCGCCCAACAAGACTAGTTTAAAGTGTCTGTAACCTCAGAAGACTCCCTGTGTTTGTGTGGGTGCAGCAGCAG  
GATGGACATATCCAGCAGACTGGAGGTTTGGCAACAGCTGGCTGAGAAGTGTGGTCTCATCACGGTCCAGCAGGGTCT  
CCAGCAGGTCTGGACTCTACTGCTGCTCTGCCTGATCTGCAGACTCTGCTTTAGACTGGGAGGTGTGTCCACCCTGAA  
GCATGTAGTGTGCTGCTGGCTGGGATGTACAGCCTCTTCTGTTCTTTGAGTTGCAGATGCTGTGGGTGCTGTTGTT  
CAGTGCTCTCTGTTACCTCGTCTCTGCTGCTCACTCAACACTCCAGTACCAGAGGCCCTCTTCTTTCCGGCTGTTATCCT  
CGTCTACCTCCTAGTTGGAGAGTTGCATTTAATTGACATGGTGACCTGGCATAAAAATAGAGGCTCTCAGATGGTGGT  
GCAATGAAGGCCATCTCTCTGGCCTTTGACCTGGACAGAGCAGCAGTGGCAGGCCTGCCCT

>Sequ44862SNP3

GTCAGCTGAGGACAGACCGACGTACTCCAAAATGGCGAACAGCAGAAAGGACGTAGAAGAGGAGATTTACGACAAGGT  
CGTGGACCTGACAGAAATATGCCAAAACGTCAGCGATGGTGGAAACCGTCTTTTCGGAACCAACTCCGGGCCAGTAGCAGA  
GAAATACTCCGTGGCCACACAGATAGCCATAGGAGGAGCGAGCGGATGGTGTGCAGGATATCTTCCAGAAGGTTGG  
GAAAGTTGCTGCTACAGCTGTAGGGGGCGGTCTTCTGCTGTTGCAGATAGCTAACAAATAGTGGCTACATCCAAGTGA  
CTGGAAGAGAGTAGAGAAGGATGTCAACAAAAGCGAAGAAGCAGTTAAAGAAGAGCACCAATCAAGCAGGCCCAGAGCT  
AAACACATTTGTTGAGAAGTCCACAGAGTTTGTGAAGAAAACATTTGTTGTCACAAGTGGTTTCATTGGAGGATTCCCT  
GCTCGGCCCTGGCCTCTTAGGGCAGAAGCGTCTCTTTTTCTTCGATGTCATGATGAGCTGTAGGTAAAAAGTAAATCAT  
TGCTGGATGGTTTTAAGTATTTTGACAGCAAGAAAACCTATTTTACAGATTAGCCTGTGGCTATGTGTCTTTACATAAGT  
GCACATCTACTACTTCAATACTGTACCTCCATGTGACAAGTAAATACGAATGTGGGACATCTGGTTAGACCTGAATGG  
CCTTCGTAACCCTCCACGTTCCAGGCCAAAATAATGACACATGATGCAAAAATTAATTAAGTTTATCAGAATGTTGTA  
ATTTTTGTGTATTTATTTATACCACACCGACATTGTAAGAGGGATAAAATATGCACTGTTGTGCACAATGGAGCCA  
AACACAGTGAAGCCAAGTGAAGTAATAATGATAATACAAATTCACCTTCACACGGCAGATGGTGGCCATAGGAATCT  
ATCAATACCAGTGTGTGTTTTCAACTCCAGACTTCATAAGCAATCATGTTTCAGGATTAACACTGGAATTTTATTCTG  
AAGTGCTGATGGATATGAGATTGTTATGCCTTTTTAGAGGTGCTCCATGTTTGATGGGTTATGTTAGCCTCCCCTTCC  
CAGTGA

>Sequ45876SNP3

ACCGACTCGCTCTCTTAGTGAAGTGCTCATGGAGTCCACAGAGAGCAGGTACGCTCACCTGCTGCAGCCCATCCGAGA  
ACTCACCAAGAACTGGGAGATCGATGTGGCTTCAGAGTTAAACGACTATTTAGAAGAGTTGGATGAGATGTGCATCAC  
GTTTGATGGAGGAGAAATAGACTGAACTTTGCAGAAGCAGCGCTGCTGATCCAGGGCTCAGCCTGCATCTACAGCAA  
GAAGGTGGAGCTGCTGCACAGTCTCGTTTACCAAACCTCTGGAGTACATCAATGACAGAAACAAGAAACGTAACAACA  
GGCGGCAGAGTCTCAGGAGGGCGACGCAGACGCAGCAGCGCCACGACGCTGAGGATGTGGCCTGTTCACTTC  
CCTGGACATCAACGCTCTCAGAGAAGTCCACAGAGAGGTGACTCCAACACGACTGTGAATGTGGCTCCTCTTCCCTCCCGA  
GTCTCTGATTCCTCTGAAACCCACGAGAAGCACAACCTTCTCTCATCAGCTTGAAGGTGAGGTGCTGTGCAGTCA  
GAAGGACTTCAGGATCAACATGTTTCTCCAGGAGACGAGGATCTGATCCTCCTCAGCTCAGATCAGGGTCCAGGTT  
TCTACAGGACAGTGAGTCTCTGCAGCAGCAGGAAGGTGCTGTGGCTCGGGTTCACAGGTGAGGCTGCAGCGGGTCCGGC  
TGATGTGGGAGACGATGGAGGTGACGCTGCAGACAACCTTCTGCGCTTAGACGACAACAACATGGAGCTGGACCAGGA  
GCCAGAGGAGCACATCGACAGGCAGCAGGCTCCAGGTGAAGGCCGGATGATTCGAGAGAGACGACAGGTGGAACCTGA  
GGAGGAGGGCGCCCTGCTGTGAACCTGTGGATGTTTTCATGACCCGTACTCTGTGCTCGGGGAGGACAAACCGTTTTAA  
ATCAGGGAAATGTTACAAGGTTTCTGATGGTCTGGATGACGGAGGGAAAGAGGAAAAGGAAAAGCAGCGCTCGTCACTTCA  
GGACTTCAGGAGCTGGTTTCAGAGGAACCTACGATCCTCCTGAACACAAGCTGAAGAATGGACCCACATTTACAGACCT  
GAACTACATTTATCTGAGCAGCATGAAAGACAACCTGAAGACCAGGAAGAGGATCTTCAGGAAAGCAGGCGTGGTGGT  
TTCTGATGACGAGCTGAGGAGAACCTTCTGACGCTGGAGGAGGGGCCACAGCAGCAGGGGGAGGAGCCTCTGGAAGG  
ATTCAGACACCCGACCTGCTGGGTGGAGACGACGCTCAACTCAGACAACGAAATATGAAGCGTTTCTGATGACCTTCC  
AGCTGAGTTTGGACCAGACGTCATATCACCAGAAGCTCCGAGAGACGAGCTGAGTTATGAAGATCTGGTGAAGCTGCG  
TGTGGAGCAGCTGGTGGTGAACCTGTCAAGGTTTACTCAGGAACTGCTCTGTCCGACGGGTAAAGACTGGGAGGA  
CATGATCCGACCTCAGCTGGTCTGCAAGGAGGAGCGTCTGGCGTTCGACATCCAGACTACGGAGACCGGGTCTGCGG  
AGCGTTGAACGGCGTCCGGTTCAGCGCAGACCGTCTCTCTATCGTTTACGGTCTGGACAACCTTTGAAGCCTGTAATA  
TCTGCTGGCTTCACTGCAGCTGGCCAAACGACTACACGGTGGAGATCGACAGTCCGAGGGTCTGGAGGACAGCTGGA  
CTCCATGGGACTGACCTGCTCAGCAGCTCAGAGCCACAGCAGATTCAGACATGACCGCTTTGACCTGAAAGCAG  
CTGAGTTCACACTGATGCTCACACACATTGAGCTTCACTCTCTTCTGCTGCTCCTCTTCTCTGACTCCTCTCTCT  
CTGCATCATGTGTTGAATCTCATATGAGACTGTAATGTCCCTCTCTCCCTCTCTCCGGGAAAATGTGCTGACGTTG  
TTTGCTTTTTTGAATATGAATCTTTGTAATAAATAAAATGAGCATGTTGTAAAAACTG

>Sequ54786SNP3

AGCCGCCATGTTTCATTCACCGCAGGTTCATCGTACAGTTCTGCTTCTTCCAGGACGAAGACGTCGCAGCAGGATGAA  
GCTCCTTTCCAGCCGACTGTCCGAAATGTTTCTGCTGATTCTTTGTGCTTAGTTTCTTGTATCGTGCAGCTGTCTGTC  
TCTGTTGTGACAGCTTCTTGTCTCAGGTCTCTACTTGGAAAAGAGATTTTAAACCTGATGAAATAAAGATTTCAATAA  
AAGATAAATCTCGTGATAGATCTGATAATAAAAGCTAAGGACTGTGAACCAGGCAGTTTTTTACAGTGTGGAGGTGTT  
TTCATCCTCTTCCCTCTCTGCATCATGACGTGGCTCTCAGGATCTGAAGTCCATCTCATCTCCTCCTGCTCAGACTC  
TTGGCAGAGCATCACATCAGCGTTTTATTTAAAGTGGAGGTTGAAATGAAACCTCCCGCACTCACCTTCCACTGCGT  
TTGTCCGGAGACGACGACGAGGAGACGACTCAAGAAAAGACTGTTTCAGCATTTTAAATTTTAAACAATTTCC  
ATTTCACTGTGGTTAAAGATCAGGAAGTGCTTGTGTGCTTTGTATGTGATTAATACGAAGGTCCACAGCACAGGTCT  
CCACGGCAACACTCCAGCGTGTCTGAGGTTGAAAATGAGGTGTGATCCTAATCCAGCAGCAGGGTGTCTCCTCACTG  
CGGGGAACAACCTGGAAGAAACCTTGAAGAGGGTGGTGTCTGCAAGGACGCTGGAGGTGCAGCAGCATCTCCTGATGG  
AGTGCATGGACAGCTGCGGAGCGCGATGTCCACCACGGGACGCCGAGGCGGGCGCCAGGATGGGTCCGATGGTGG  
TTCACACGGGCTGTGTTACGGACCATCACATCTGCAGGGGCACGCCAACCTGGCTGGCAGCTCCTGACGATGG  
CGCGGTGACGGCCGTGGTGGCTAGCGTGGTTGCTGTTGAACTTGATCACTGGCCCTTGTGAAAGCGGGCCGGT

GGTTTTCTTCGTGCTTCTCCTGGTAGTTGGGGTGGATGGCGTGGCCATGTCAGCGCTGATCATGAAGGAGAGCGGCG  
CCGCCTGCTGGAAGGCCGTGAGGTTGGAGGCGGAGGCGGAGAGGGCGGTTGAGGATGAGCTCCGTGAGGTTGGACTGAG  
CACCTTGAGCGCTCTCTGACCCACCTCTTCTGTTGTCGTACAGAGTGTATCATGCGGACGTTGGGATCTTTGGTCAGAG  
AGTCTCCGGAGCAGGACGCCATCAGGCCCTGCAGGGCGCAGTAGCAGCTGTGAAGGTTGTCCAGACGAGGAGAGTAGA  
TGAACTCCTCGTACACACCTCCCAGAGCCGCGGGCTGAGTGTGGTTCAGGCACAGCTCAAAGTCCATCAGCGCCTCCG  
GCTCCACGCCCAGCTCCGAACACAGCACCTTACCAGCGCCGGGTGGTGTCTCCGCGTGTGGCGGCGGCGGAGG  
CGTCTCCAGAGGACGCACAGCCCCTCTCCAGCTCCTCCTGGACGACCGTGGCGATGACGGGAACCAGGTGGTTCTCCT  
TGTGGGGCCGAAGGAGTGTGACGTCCCGCTGCAGGTGGATGGCCAGGTGAGGGATCCTGAGCAGAGGCCTGGGGA  
CGTGAACCAGACGGTGGAGCAGCCGCGCCACTCTTGACCATGACACGGCCGGCGATGGTCAAGGTACCGTCAACCC  
AGGTGTTCCAGATGCCGCCCGCTAGCACTCCACCCCCACCTGCAGACAGCCCTGCTTCGTCTCTTAGACCTCGGCT  
TCACCCTGAGGACGGGGCTGTCTGTGTGGGCGCCGATCATGGAGAAGCCATTTCCCGGAGGTAGCCTCCGCCACAG  
CGAAGGCGATGAGGCTGGAGAAGTTCCTGGTCAAAAGTACTTGTGGCCGGCTTGATGTCCACTGCTCCGACTCCT  
TCAGCTCGATGAATCCCGCCTCCAGCAGCCGCGCTTGCATTCTTCCACCACGTGATACGGAGACACCCCTCTGTTGA  
CAAATGCAGGAACCTTTGGCAGCGGACTGCACGGCCTCTTTGGTGTCTTTCATGATCAAAAACT

>Sequ54874SNP3

AAATGCACAATTTACTCTTGTGTTGAGTCTGTTTGCCTGGTGTGTTAAGGAAATTCAACTTTTAAAGAAGTGGGACAGC  
GCTGGGAGGCGGACAGACAGCGCTGGTTTTGGCCTTTTCATGCAATTTGCTGACAATATGAAAAATATAGAACATTACC  
AGCCACAGCCATGACCTTTAAATGCTAACATTTAGTAGCATTAGCATGCAAAGTGAAATTCAAAAATGGGACTGCA  
AGTGTCCAATAAACAGCTATTTCCCTCCTTGTGTTGTCAACTGAAGCAATATGACCCACTGACATTTACTAAAGCCATT  
CTGCATACACAATAAACTCCAACAATAAGAAACCGAAGGCAAAATGATGCTCCAACAATATATTCAGTGGCATAAAT  
TTATATGGGTCAGGTGAATCCTATACACTGTATATCTGCTATTCCATATTTATCTATGTACAAAAATAAACAACTGGC  
TCCTTGACCAACCCTGATAATTCAGTACTTCCAGCTAAATGACATTTATCAAATGCACTGCAGACATTTGTTTAGAC  
TTTTCCCCCAAAAATAAAAATTAATTAATTAATAAACAATCACAAATGATGCTATTAGGAGTTAATCCAACAACAG  
TAAATGATAACAAAATGTTGTCATGCTGGGACGGGCTACAGTTTATATCAATTTACAGTAAAATGAATAAAAATGTA  
TGTTTCCAATTTATGAAAAATAATCAGCAGTCAGTTCTGTTAGTACTGAAGAAATTCATACAGCATGTTTTTCAGATA  
ATCGTGTGTGATTATAACCTGCACTTGTACTATCCTATTATTTGATAAGATTAACACAATGGCAATTTTTCTAGAAG  
CTCATATCAAGTCGACTCTCACTTCACTACGCCCTCTGAATTCATGCCACCCTCACTCCACTCTAACACACTCCTT  
GCTCAACTCAGAGATACTGTGGCCAAACTTAGTAGATCCTGTTTCAGAGCCTCCACGCAGTCGGCCCTCTGGCTAGT  
CTGCGAAGGCAATCCCAGCAAGGGAGGAGGATAAGAAGGGGCGAGGACAGTCTGACAGCCAGCAGCAGAGACAGG  
CAGGCTCGACCCAGTGCCGGGTAAGTGTAGTGTGGGAAAACAGTATACCTGCGGGAGGAGCACAGCCAGTAGCCCA  
CC

>Sequ55413SNP3

AGTTCCTGATGATGTTAGCCCTTTTCACTCTTGACACATAAGGCTAAACTATCTGAAAAAAACCAAAAAACAGGCCTCA  
GTTGTTTTGCTTTAACTGCTCACCAGCTTTGAGTTAAACACTGTAACATGGCTCCATTCATGTTTAAATATTATCCTA  
TTGTAATAATAAAATAAAACAACCTCTCAAGATTCTTTAAACTCCCAAAATCCACAGAAATACATGGCAAATGATAA  
ATACTGAGAACCCTGTTACATAAAAACATGCAGCAGCATGAGTGAATGTAACAGTCTAAACATGGCTGGCTGGAAGTT  
AGGAAGGTTAAAGATGTCAGCAGCAAAAGAGGCTTAAAGTATCATCTTCCAGTCCATGTGCAAGGGGAGATCATC  
AGGTTGCTCCGAGTAAAAAATGAGGGGGTGGGTGGTGTGGAGTGGGTGGAATGTGTCATCTTGTGGGATTTG  
CGCCAGGCCATTAAGATGCAGCCGCATGCGGATCCTCTCTGGCGGATACAGCAGAACGTTCTTAGCTGCTTTGATAG  
TGTTCTTCATGAGCATCGCCACAGTCATGGGTCCCACACCTCCAGGCAGTGGAGTGAAGCCTGCCTTCTGTCTCA  
CGCCTTCAAAATCCACGTCTCCAACCAGTCTGTTCTTTCCACTGACCGGGTCTGCACTCTGTTTATTCCAACATCAA  
TCACTGCTGCGCCCTCTTTGATCATGTCCGCAGTGTAGGTTTGGAAATCCCTGCAGCAGCCACGATGATATCAGCGA  
TTTTAGTGTGTTGGCAAAGTTGCTCCTTTGGAGTGTAAACGGTGAAGAAATGGTACCCTGCACTCACCCTCCGGCCCTCT  
CGTGACGGCCCTGTGATGCAGTAACATGGCGATGGGCATGCCACATTTCTTGGAGCGTCTGCAACCACGACATCTCT  
TCCCAAGAGTAGGAATACCTGTGCGTTAATCATTTCCAGACTCCCCAGGGAGTGGCGGGGAGCATGGTGGACTGAT  
CCAGGCACATGCGACCCACATTGACTACATGGAAACCGTCCACGTCTTGGTAGGGGAAACTGCATTACAGACTGTGC  
GCTCATCGATGTGCTTGGCAGAGGCAGTTGGACCAGCAGGCCGTCCACACGATGGTCTGTGTTGAGTTTGTAGATCA  
GGTCCAATAACTCCTCCTCGGTGATGTCTGAATGCTTGAAGATCGTCTCACTAGAGATTCCAACATCCGCTGCAGCGC  
GTGCTTGTTCAGGAGTGGAGTGGCTGGCTGGGTTGTCTCTCAAGAATCACACTCAGATGGGCTCTCCTGTGGC  
CGGCTAAGACCCATTTCTCCACGTGCGCCCGGCTCTCCCAATCTGCGGCTGCTAGTTTCTTCTGAGATGACCA  
CCGCCTCCTGTCTCAGGGCGGACGTGTGCAGTTTACAGACTTGTGCTGGGAGTGTGGCACAGTTTCTGTGAGAGTCC  
TGAGCGCTGCCATTTCTGCGGCTGAGAGAAGCAGGGACACCACGGCCGATTACGATTACGAAATACTACCACACCAC  
CACCACCACCACCCGGGCTGACAGAGAGATGTCTGTGAGAACTG

>Sequ55559SNP3

AGTTCCTAGTGAATGTTTGTGTCAATTTGAAGAAGTTTTCATCAAGGTGTTGCTGAGATATCGTGTCCACGAGTACGGGA  
CGGACTGACGGACAACCTGAAAAACAATATGCCACCGGCTCTGACTGTCGCCGGTGCAGAGGATAAAAAAAGTTGTTT  
TGTTAGATATAATGTTGATGATCATTTTAATATTTGTGATATAGGATCATGAATGTGCAGTCATTCATAAAAAACACC  
AGGAAAAAACGAATACACATGATATGTCTCTTATGGTTTTCTACAGGAAGAGATTTAACAGCAGACTGTGAGCTGAGT  
CTTTACCCAAATTAGAAAAACAATTAAGTATTTATTACAATGCGAGTTCACAACTGCAGCTTTAACAGCTTTTAAAT  
ACCTGGAAGCTGGTTAAATGATTTTATAACAAACGTGAAGAGGATAAAAGTACCATAACAACAGAAATGAAAAACA  
ATCCACAACGATGTTGACGTGACGACAGCTGTTGTTAAACGTCCTCACTTGAAGAAGCTTCTGAAACTTTGGTTGAG  
CATCTCCAGCTCTGTGTTGTTCTGCATCATCTGCGGCAGACTGCTCACGTTTCATGATCGTCTTGTGAGCTTCGTCAA  
CAGCTTCTCTCAAACCTCCTTCGTCACTCGCGCTCTCCAGGTGAGGAGCTTCGGCCGCCCTTCGAACCGCTCCACACC  
GGCTCCAACAGGTGCATGATCTCAACTATAGCCACCAGATCAGCCAGAGAGATTTTGTCTCCGATGATGAACGGTTT  
GTTCTGCAGGAATTTCTCCTCCAGCATGTGAGTGTGCTTCCAGTCTCGATCGCAGCGTCCATCTTCTCCTTTGG  
GACCTCAGAGCCCATGATGACAGGAACAGAGTCTGAGCAGGAAGACCTTTGACCCGTGAGCTCTGAGGTTTCATGTG  
CTGCCAGGACAGGTATTCATTAACGCGAGCTCGTGTGAGGTCAGCTGGAACACAGTACTGCCACTAACGTTGA

ATATTTCTGCACCATGTACTTCAGGATCGCAGTGCTTTTCAGTCAGAATGAAGCTTCCATCCTTCATCACAGGGACTTT  
CCTGATCATGCTGATTTTACCAAACCTCCTCGCTGTGCTGCTGACCTGTAGAGAGGTCGACGCGCTTGAACCTCAAAGGG  
AATCCCAGATCGCTTTGGCAAACAGGAAGACGGAGCGGCAGGGCTGGGAGAACAGGTCCAGATAGAGCTCCATTATGTC  
AAGAGTGTGAATGCTGCAGATGCTTCGTTTTCCACCGCGGTTTTCCGCCTCTGTGTCCTCAGTCTCTCCTGCCGCGCCT  
CTTGTCCTCAGCCTGCGCAGGACTCCGCTCTCCTCGCTGTAAAGGCTCATTGATTTCTAAACGGCGGCGACAGTTCA  
CAGTGAGCAGGCCGTCGTGGTTGAGCGGTCTGACCTTTGGCCTCGGCCCTGTCCAACCTTTTGTAAACAACAGCTGATA  
TTATCACGTTTTTATCTTGCAACGGTTCCGGTCTGTATTTGTGCATGCCTGTATTCTTGGTGCAGCAGGTACTGAGGG  
GCGGAGACGCCGTTGGTGGACTCACCTGGGCCCGCGGCTTGTCCAACCCGTAACCCCGCCTTCCGCTCTCTTTAT  
TTTCATATATTCATAGGTATTTGGTGAATAAATGTATTTTATTTCAGGGGGGCTTGTCCAGTTTTTTGGCTTCACTA  
CCTTGTAGTTTTAATTGGCTGATTTTTGCTTGGTTTTCGTTGCATTGCTTTGTTTCGCCTCACC

>Sequ56035SNP3

ACAATGGTGATTAAAGAAATGCACATCTCCATCTTTGTTTTCTGGCCTTTAATCATGTTTAAATCGTGCTTATCACAGTGA  
GCAGCTGCCAAGGAAAGATCATCACTTGTGCAACCGTTGCTATATGATGCAATCGAAAAGAAATGAAAAGAAAATGCCA  
AGGTAATCGCCTCAACAAAATAAAAGTGCCTTTTTAAGATCATGTAGAGTAAGTACATACACTAAGTACATTACCCGTT  
GACTTAATTTATTCATTAAGCAGATATTATAGGAGTTTTACTTAGACTACTTATGGGCCAAATCATTCTAAAAATGTAAG  
AGTGGTTGCAGCAGAGGTGAATAGAGGTGTTACTGAAGGTCCTCCACTTGGGTGTCAACAACAGAGGACACCACCTTT  
CCATCGACAATCTCCTCCAGATGGTCTTCACTCTCCTCTCGATGTGAGGTTTATGCTCCTCCACTTTTTCCACCACC  
TTGCTGATGACAAATAGCCTTTTTCTCAACTTGTCTCCTCCAGCAGCCTCCTGTAAGTCCGCGATCTCCAGTTCCAGC  
CTCATCTTGATGTCCAGCAGCAGCTTGTAGTCAGCTTGTGCTGCTCGATGGAGGCTATCAGCTGCTGCAGCTCTACC  
TCCAGCATGTTAATGGTGTATGTCAGCTGGCTGAGCTGAGAGCCGTATCGACTCTTCACTTCTTCCAGATTCTGTCTGC  
AGGCATGAAGCTCTGTGCGGACACTTTGCCGATTTATCTCCAAACTCTGGTAGGTCTCTCAGCTCTGACAGCTCA  
GAGTGAGATGTCTTACCTCTACTGTCCAAGAGGTGATGTCCGACTGGAGAGAAGTAACCTTAGACTGGAACCATTTG  
TCGAGTTCCAGCTTGTCTTCCACAACCACAGCTTCCATACTGCTCCCTGACTTCTTGCAGGACCTTGGTCAGATCAACA  
GACTCGGCCTGTCCACATCCACATTCACAGCACCAGACTGCTGGACCTCACCTGACTCATCTCCTCCTTGTGGGTG  
CTCTTATGTACACGAGCTCCTCTTTTCAGGCTTTCTATCTGCAGCTCCAGGTCAGTGTAAAGAGTCAAGCTGTCA  
CGGACTCCTCGGAGACGAAGCACATCGGCCTCCACCGTCTGACGCATAGTCATCTCCATCTGATATTTTATCTTAAAG  
TCATCAGATGCCAGTTGAGCGTTGTCCATCTGCAGAAGGACTCCTTGATTCTCTAGGCATCTCCTGGAGATCTTAGCT  
TGGAGGTCAGAGATGGTGGCGAAGTAGGCGCTGTAGTCTCTGGAAGCAGTCGGAGATCTCTTCTCATAAAAACCTCTCTG  
ATCTGCAGCTCCAGCTTCTGTTGGCTGACTCCAGGCAGCGCACCTTCTCCAGGTAAGAGGCCAGGCGGTCTGTTGAGA  
TTCTGCATGGTCACTTCTCGTTGGTGTACTGAAGTGTGCTCGTAGGACCTAAGCCAGACAACATGGTGGACTGA  
GAGATGCGGGTCCCGAAAACCCCGCGCCCCATACACGCTGGGCGTGGCGGTTCTGGAAGGTGCCCGCGGTGGAGATG  
CGTGTATGCCGCTCCGACGAGCTGCCTCCCTCCACTCAGGCTGAATGCCCCAGAGCTGGAGCTGCTGAACGAGCTG  
TAGCTCCTGGACTAACCGCATGGTCTCA

>Sequ89765SNP2

GTTGAAGGGTCCACAAATTTATTTGGAGGAAGTTGAAGGACAGATCTAATAGGCTTATGACTTTAGTAGTACCTTCTTA  
AAATGGGGAGGGGGGACATACCAGGAAAGCTGGTAGCCTGGGTTCAATGCCTGATACAACCTTTGAGGTTTGTCTGTTG  
ATTTTAGCATCAAGCTGTGAGCTACAATCTGAAATGTTTTAGTCTTCGTTACTATACACATACAGATCAATACAGTGG  
CCGCTGTATGAAATGATCATGTTTAGTAACAGAACATTTTTCAAGTATTATGTTTCATGTCCAGGCAAAAGTGCTTCGC  
TTGTTTTCTGCCAAAGAGATTTTATCTGTTTCACTACTTAAACCTTCTTGACTGTGTTCTCTGGTTGTTTTCATCTGTGT  
CTGCTAGTTACAAAACTACAGTCTGAAAAAGCACACACACTAGAAGATACACCAAATATCACTTACAATGTGCCACA  
CCACTTGGCTTCTTATAAAGTAGTATGCTCTGTAAATACAAATTGCTAATGACACTGGTATTACTAAAAGAGCAGG  
GATGTAATGCTGTTGGAGCGTGTCTATAACTGGACTTACATACATCTATGGTGGCATTTGTGAATAAAGCCTCATTGT  
TATTCAGATTTATCAGACCTCAGACTGTACTATATACACAAAACAGATTTTACATTTTAAATTACCTTGTTCAGTTTA  
CCTCCTGTGTTGTTCTGTGCCATCTAAATAAATAATCATGTGCTGCACTTCTGCGGCTGAAGCTTGCCTTATTGCCTGTG  
TTATGTGGTGTACTGTTAATGTCAAATGCGTTTTCTTTTTATGAGTCAAGTATGAGGAATGGGTCTGTAGGGCTGCTGCA  
GGAGGGGAGCTGCAGAGCCAGG

>Sequox9bEST

GTCAACAAAGAACCACCCAGATCAAGACAGAGCAGCTGAGCCCCGAGTCACTACAGCGAGCAACAAGGCTCCCCACAGC  
ACATCACCTATGGGTCTTCAACCTGCAGCACTACAGCCCCCTCCTTACCCTCCATCACAAGAGCACAGTATGACT  
ATTCAGACCACCAAGGTGGTGCCAACTCCTACTACAGCCACGCGGCTGGCCAAGGCTCCGGCCTATACTCCACCTTCA  
GCTACATGAGCCCCAGCCAGAGGCCGATGTACACCCCGATCGCCGACACCACCGGGGTGCCCTCTGTGCCCCAGACCC  
ACAGTCCGACGACTGGGACCAGCAGCCATTTACACACAGCTGTCCA
